# Supplementary material for: Metabolome and Transcriptome Profiling Reveal Carbon Metabolic Flux Changes in Yarrowia lipolytica Cells to Rapamycin
Source: MDPI journal article supplement (doi:10.3390/jof8090939), 2022-09-06
Supplement: s1 [file s1]

Table S8: Enzymes and genes related to amino acid and lipids metabolism.

| Enzymes | Genes                | Annotation                                                          |
|---------|----------------------|---------------------------------------------------------------------|
| HK1     | <i>YALI0_B22308g</i> | Hexokinase                                                          |
| HK2     | <i>YALI0_E20207g</i> | Hexokinase                                                          |
| HK3     | <i>YALI0_E15488g</i> | Hexokinase                                                          |
| ACL1    | <i>YALI0_E34793g</i> | ATP citrate lyase subunit 1                                         |
| ACL2    | <i>YALI0_D24431g</i> | ATP citrate lyase subunit 2                                         |
| FUM     | <i>YALI0_C06776g</i> | Fumarate hydratase                                                  |
| SDH     | <i>YALI0_D23397g</i> | Succinate dehydrogenase                                             |
| PCK     | <i>YALI0_C16995g</i> | phosphoenolpyruvate carboxykinase (ATP)                             |
| PRPS    | <i>YALI0_B00836g</i> | ribose-phosphate pyrophosphokinase                                  |
| HISG    | <i>YALI0_C05170g</i> | ATP phosphoribosyltransferase                                       |
| AROF    | <i>YALI0_B20020g</i> | 3-deoxy-7-phosphoheptulonate synthase                               |
| ARO8    | <i>YALI0_E20977g</i> | aromatic amino acid aminotransferase I/2-amino adipate transaminase |
| ARO9    | <i>YALI0_C05258g</i> | aromatic amino acid aminotransferase II                             |
| TRP3    | <i>YALI0_E14751g</i> | anthranilate synthase / indole-3-glycerol phosphate synthase        |
| GOT1    | <i>YALI0_F29337g</i> | aspartate aminotransferase, cytoplasmic                             |
| ILVE    | <i>YALI0_D01265g</i> | branched-chain amino acid aminotransferase                          |
| ILVD    | <i>YALI0_C23408g</i> | dihydroxy-acid dehydratase                                          |
| ILVB    | <i>YALI0_C00253g</i> | acetolactate synthase I/II/III large subunit                        |
| ILVC    | <i>YALI0_D03135g</i> | ketol-acid reductoisomerase                                         |
| ALT     | <i>YALI0_D06325g</i> | alanine transaminase                                                |
| GDHA    | <i>YALI0_F17820g</i> | glutamate dehydrogenase (NADP+)                                     |
| GUDB    | <i>YALI0_E09603g</i> | glutamate dehydrogenase                                             |
| GLNA1   | <i>YALI0_D13024g</i> | glutamine synthetase                                                |
| GLNA2   | <i>YALI0_F00506g</i> | glutamine synthetase                                                |
| ARG1    | <i>YALI0_E07535g</i> | arginase                                                            |
| OTC     | <i>YALI0_D14894g</i> | ornithine carbamoyltransferase                                      |
| ACC     | <i>YALI0_C11407g</i> | acetyl-CoA carboxylase                                              |
| FABF    | <i>YALI0_F30679g</i> | 3-oxoacyl-[acyl-carrier-protein] synthase II                        |
| FAS2    | <i>YALI0_B19382g</i> | fatty acid synthase subunit alpha,                                  |
| FAS1    | <i>YALI0_B15059g</i> | fatty acid synthase subunit beta                                    |
| ACOX3   | <i>YALI0_C23859g</i> | acyl-CoA oxidase                                                    |
| ACOX1   | <i>YALI0_D24750g</i> | acyl-CoA oxidase                                                    |
| ACOX2   | <i>YALI0_F10857g</i> | acyl-CoA oxidase                                                    |
| ACOX4   | <i>YALI0_E32835g</i> | acyl-CoA oxidase                                                    |
| ECHS1   | <i>YALI0_B10406g</i> | enoyl-CoA hydratase                                                 |
| ACAA1   | <i>YALI0_E18568g</i> | acetyl-CoA acyltransferase 1                                        |
| ACAT1   | <i>YALI0_E11099g</i> | acetyl-CoA C-acetyltransferase                                      |
| ACAT2   | <i>YALI0_B08536g</i> | acetyl-CoA C-acetyltransferase                                      |
| DGAT1   | <i>YALI0_D07986g</i> | diacylglycerol O-acyltransferase 1                                  |
| ATG15   | <i>YALI0_F06358g</i> | lipase ATG15                                                        |
| TGL3    | <i>YALI0_D17534g</i> | TAG lipase                                                          |

|       |                      |                                                   |
|-------|----------------------|---------------------------------------------------|
| TGL2  | <i>YALI0_E31515g</i> | triacylglycerol lipase                            |
| ERG25 | <i>YALI0_F11297g</i> | methylsterol monooxygenase                        |
| ERG2a | <i>YALI0_E32065g</i> | C-8 sterol isomerase                              |
| ERG24 | <i>YALI0_B23298g</i> | Delta14-sterol reductase                          |
| CYP51 | <i>YALI0_B05126g</i> | sterol 14alpha-demethylase                        |
| SOAT  | <i>YALI0_F06578g</i> | sterol O-acyltransferase                          |
| ERG2b | <i>YALI0_B17204g</i> | C-8 sterol isomerase                              |
| LIPA  | <i>YALI0_E32035g</i> | lysosomal acid lipase/cholesteryl ester hydrolase |
| FAD2  | <i>YALI0_B10153g</i> | omega-6 fatty acid desaturase                     |
| PROB  | <i>YALI0_A19206g</i> | glutamate 5-kinase                                |
| PCDH  | <i>YALI0_B09647g</i> | 1-pyrroline-5-carboxylate dehydrogenase           |
| PRODH | <i>YALI0_B09625g</i> | proline dehydrogenase                             |

---
