# Supplementary material for: Metabolome and Transcriptome Profiling Reveal Carbon Metabolic Flux Changes in Yarrowia lipolytica Cells to Rapamycin
Source: MDPI journal article supplement (doi:10.3390/jof8090939), 2022-09-06
Supplement: s1 [file s1]

Table S9: Abbreviations for metabolites.

| Abbreviation | Annotation                          |
|--------------|-------------------------------------|
| G6P          | Glucose 6-phosphate                 |
| GA3P         | D-Glyceraldehyde 3-phosphate        |
| $\alpha$ KG  | alpha-Ketoglutaric acid             |
| OAA          | Oxaloacetic acid                    |
| 6PG          | 6-Phospho-D-gluconate               |
| E4P          | Erythrose 4-phosphate               |
| Shi          | Shikimate;Shikimic acid             |
| Cho          | Chorismate                          |
| G3P          | Glycerate 3-phosphate               |
| ASH          | L-Aspartate 4-semialdehyde          |
| TH           | L-2,3,4,5-Tetrahydrodipicolinate    |
| DAP          | LL-2,6-Diaminopimelate              |
| DMP          | 2,3-Dihydroxy-3-methylpentanoate    |
| AcGlu        | N-Acetyl-L-glutamic acid            |
| AcGSA        | N-Acetyl-L-glutamate 5-semialdehyde |
| AcCit        | N-Acetyl-L-citrulline               |
| Cit          | Citrulline                          |
| AS           | L-Argininosuccinate;                |
| Orn          | L-Ornithine;                        |
| CA           | Citric acid                         |
| PalACP       | Palmitoyl-acyl-carrier protein      |
| TAG          | Triacylglycerol                     |
| FA           | Fatty acid                          |
| PrePP        | Presqualene diphosphate             |
| SE           | Squalene 2,3-epoxide                |
| Zym          | Zymosterol                          |
| Erg          | Ergosterol                          |
| GSA          | L-Glutamic gamma-semialdehyde       |
| CE           | Cholesterol ester                   |
| Cam          | Campesterol                         |
| Chol         | Cholesterol                         |
