# Supplementary material for: Metabolome and Transcriptome Profiling Reveal Carbon Metabolic Flux Changes in Yarrowia lipolytica Cells to Rapamycin
Source: MDPI journal article supplement (doi:10.3390/jof8090939), 2022-09-06
Supplement: s1 [file s1]

Table S1: The primers used in this study.

| Name            | Sequence                 |
|-----------------|--------------------------|
| YALI0_B04202g-F | CAACATTCTGGTGACTCTGA     |
| YALI0_B04202g-R | TAGCGTAGGTGGTGAAGG       |
| YALI0_B05654g-F | TCTTCGGTATCGGTGTGA       |
| YALI0_B05654g-R | GCCATCCTCCAGAGTAGT       |
| YALI0_B08899g-F | GCCTACCAGTCCTTCTACA      |
| YALI0_B08899g-R | CCAGAATCAGCGTGTGA        |
| YALI0_B10494g-F | CCTCATACGAAGAACATTGTG    |
| YALI0_B10494g-R | CGGAGCAGGTAGTGAAGT       |
| YALI0_B20328g-F | ACTCAGAGCCAGTCAACT       |
| YALI0_B20328g-R | GTGTGCCAGTAGGTCCTC       |
| YALI0_B21846g-F | TTCTCTGCTGCTGTCAAG       |
| YALI0_B21846g-R | CGTTATCCATCTCGTTCCA      |
| YALI0_C13706g-F | CCAAGAACATCAAGAAGAAGG    |
| YALI0_C13706g-R | CAGAGTGTAGTCCGAGG        |
| YALI0_D07326g-F | CAAGGAGATTCACGAGGTT      |
| YALI0_D07326g-R | CAGACACAGCACAGACAA       |
| YALI0_E33935g-F | CGTCGTGGTCATCTATCG       |
| YALI0_E33935g-R | GGTTGGAGTCGGTCATTG       |
| YALI0_F19866g-F | ATCAAGACCACCTCCAAGT      |
| YALI0_F19866g-R | GAAGAGAAGAGAACCGACAA     |
| YALI0_F24255g-F | TTGGTGACGACTGTGGTA       |
| YALI0_F24255g-R | GAAGAAGCAGCAGAAGAGG      |
| 26S 5           | GGGAAGGAAATGAGTGGAGAGTGG |
| 26S 3           | GTGGATTATGTCGTCGGTGGCA   |
