# Supplementary material for: Metabolome and Transcriptome Profiling Reveal Carbon Metabolic Flux Changes in Yarrowia lipolytica Cells to Rapamycin
Source: J Fungi (Basel). 2022 Sep 6;8(9):939. doi: 10.3390/jof8090939 (PMC9504542; doi:10.3390/jof8090939)
Supplement: Supplementary file 1 [file jof-08-00939-s001.zip]

Archive with 10 entries (10 files):
- Figure S1.pdf
- Table S1.pdf
- Table S2.xlsx
- Table S3.xlsx
- Table S4.xlsx
- Table S5.xlsx
- Table S6.xlsx
- Table S7.xlsx
- Table S8.pdf
- Table S9.pdf
