# Supplementary material for: Metabolome and Transcriptome Profiling Reveal Carbon Metabolic Flux Changes in Yarrowia lipolytica Cells to Rapamycin
Source: J Fungi (Basel). 2022 Sep 6;8(9):939. doi: 10.3390/jof8090939 (PMC9504542; doi:10.3390/jof8090939)
Supplement: Supplementary file 1 [file jof-08-00939-s001.zip › Table S2.xlsx]

## Sheet: RAP vs CK
Table S2: The differentially accumulated metabolites.
	VIP	mean_RAP	sd_RAP	mean_CK	sd_CK	Fold Change_RAP/CK	log2(FC_RAP/CK)	p.value	FDR	sub_class	class
L-Methionine S-oxide	1.25948	3.91199e+08	4.71914e+06	2.11261e+07	2.50857e+06	18.517	4.2108	2.89848e-08	4.05778e-05	NULL	NULL
Betaine	1.25896	1.50756e+09	6.35033e+07	2.24013e+10	6.01118e+08	0.067298	-3.8933	4.66138e-07	7.76093e-05	Amino acids, peptides, and analogues	Carboxylic acids and derivatives
Uridine	1.25876	1.05524e+08	3.04176e+06	1.14714e+07	437282	9.1989	3.2015	7.57992e-07	8.83598e-05	NULL	Pyrimidine nucleosides
Phosphorylcholine	1.25864	1.30507e+09	7.60213e+07	1.22237e+10	3.73642e+08	0.10677	-3.2275	9.88831e-07	0.000100776	Quaternary ammonium salts	Organonitrogen compounds
L-Glutamic gamma-semialdehyde	1.25779	3.66999e+08	1.23791e+07	7.9043e+07	5.6358e+06	4.643	2.2151	3.30231e-06	0.000161025	Amino acids, peptides, and analogues	Carboxylic acids and derivatives
S-Adenosylmethionine	1.25767	1688.85	0	1.13958e+09	5.55134e+07	1.482e-06	-19.364	3.73452e-06	0.000167974	5'-deoxy-5'-thionucleosides	5'-deoxyribonucleosides
Ophthalmate	1.25762	6.0115e+09	1.84929e+08	2.10147e+09	5.51075e+07	2.8606	1.5163	3.9333e-06	0.000171744	NULL	NULL
Tryptophanol	1.25758	8.56563e+07	3.16184e+06	2.14986e+07	439697	3.9843	1.9943	4.06373e-06	0.000173519	Indoles	Indoles and derivatives
L-Glutamine	1.25749	1.30193e+10	6.341e+08	5.42811e+08	2.68275e+07	23.985	4.5841	4.43849e-06	0.000181316	Amino acids, peptides, and analogues	Carboxylic acids and derivatives
N2-Succinyl-L-glutamic acid 5-semialdehyde	1.25708	1.0213e+08	4.75222e+06	1.09543e+07	1.74853e+06	9.3233	3.2208	6.29918e-06	0.000213446	Amino acids, peptides, and analogues	Carboxylic acids and derivatives
Linatine	1.25652	3.75102e+08	1.97852e+07	3.19507e+07	7.11972e+06	11.74	3.5534	9.32132e-06	0.000253535	Amino acids, peptides, and analogues	Carboxylic acids and derivatives
N-Acetyl-L-phenylalanine	1.256	1.02904e+07	422081	3.55138e+07	1.61348e+06	0.28976	-1.7871	1.26193e-05	0.000297011	Amino acids, peptides, and analogues	Carboxylic acids and derivatives
Saccharopine	1.25559	3.40484e+08	2.24136e+07	1.82985e+07	1.87916e+06	18.607	4.2178	1.5665e-05	0.000333878	Amino acids, peptides, and analogues	Carboxylic acids and derivatives
Nicotinamide ribotide	1.25525	1.51933e+08	3.45161e+07	9.98867e+08	5.09289e+07	0.15211	-2.7169	1.83482e-05	0.000358982	Nicotinamide nucleotides	Pyridine nucleotides
Tyrosol	1.25522	1688.85	0	7.2678e+07	5.29441e+06	2.3237e-05	-15.393	1.85568e-05	0.000361385	Tyrosols and derivatives	Phenols
Pyridoxamine	1.25521	9.6446e+07	1.95138e+06	1.79545e+08	5.74092e+06	0.53717	-0.89656	1.86762e-05	0.000361569	Pyridoxamines	Pyridines and derivatives
L-Glutamic acid	1.25466	2.0675e+10	8.61888e+08	6.71048e+09	6.52477e+08	3.081	1.6234	2.36244e-05	0.000399496	Amino acids, peptides, and analogues	Carboxylic acids and derivatives
3-Methylindole	1.25412	2.40991e+08	1.00403e+07	8.15335e+07	8.24908e+06	2.9557	1.5635	2.89718e-05	0.000439512	Indoles	Indoles and derivatives
Cysteinylglycine	1.25376	1.24821e+08	3.37585e+06	6.11963e+08	4.08401e+07	0.20397	-2.2936	3.28662e-05	0.000463838	Amino acids, peptides, and analogues	Carboxylic acids and derivatives
Uracil	1.25345	7.87736e+08	5.15097e+07	1.77071e+08	1.10945e+07	4.4487	2.1534	3.63487e-05	0.000495055	Pyrimidines and pyrimidine derivatives	Diazines
(2R,3R)-3-Methylglutamyl-5-semialdehyde-N6-lysine	1.25284	6.88855e+07	6.13626e+06	1.05596e+06	133336	65.235	6.0276	4.38932e-05	0.000541236	NULL	NULL
Ureidopropionic acid	1.2512	4.17778e+07	2.91073e+06	9.36976e+06	1.48711e+06	4.4588	2.1567	6.7453e-05	0.000679314	Ureas	Organic carbonic acids and derivatives
Kynurenic acid	1.25064	7.19673e+07	8.39881e+06	2.01802e+08	1.0604e+07	0.35662	-1.4875	7.66958e-05	0.000728232	Quinoline carboxylic acids	Quinolines and derivatives
Cytosine	1.25019	5.25094e+07	2.53726e+06	9.5307e+06	3.82486e+06	5.5095	2.4619	8.45642e-05	0.000767369	Pyrimidines and pyrimidine derivatives	Diazines
D-Octopine	1.24974	6.34072e+08	6.60382e+07	2.87649e+07	4.4218e+06	22.043	4.4623	9.28154e-05	0.000810707	NULL	NULL
Indole	1.24857	4.16397e+08	1.40825e+07	2.70439e+08	9.31975e+06	1.5397	0.62266	0.000115986	0.000917366	Indoles	Indoles and derivatives
N2-Succinyl-L-arginine	1.24856	2.65274e+08	1.31179e+07	1.38298e+08	6.62714e+06	1.9181	0.9397	0.000116172	0.000918092	NULL	NULL
L-Tyrosine	1.24827	1.59613e+07	1.07426e+06	4.83093e+07	3.63757e+06	0.3304	-1.5977	0.000122249	0.000946806	Amino acids, peptides, and analogues	Carboxylic acids and derivatives
Dethiobiotin	1.24782	6.18653e+07	4.26578e+06	2.54951e+07	844795	2.4266	1.2789	0.000132028	0.000992058	Fatty acids and conjugates	Fatty Acyls
S-Adenosylhomocysteine	1.24732	1.12505e+09	1.06809e+08	2.90776e+09	1.89638e+08	0.38691	-1.3699	0.000143335	0.00104386	5'-deoxy-5'-thionucleosides	5'-deoxyribonucleosides
Choline sulfate	1.24504	3.32885e+08	9.38081e+07	1.32573e+09	9.30498e+07	0.2511	-1.9937	0.000201129	0.00129236	NULL	NULL
Riboflavin	1.24421	1.84446e+08	1.5851e+07	4.63346e+07	1.03001e+07	3.9807	1.993	0.00022454	0.00139321	Alloxazines and isoalloxazines	Pteridines and derivatives
Thiamine	1.24385	1.86438e+09	1.90722e+08	4.76818e+08	2.38998e+07	3.91	1.9672	0.000235367	0.00143521	Pyrimidines and pyrimidine derivatives	Diazines
2-Hydroxybutyric acid	1.2434	7.62478e+08	7.98021e+07	1.56392e+08	2.97476e+07	4.8754	2.2855	0.000248899	0.0014888	Alpha hydroxy acids and derivatives	Hydroxy acids and derivatives
N-Acetyl-L-glutamate 5-semialdehyde	1.24252	5.0697e+08	4.72822e+07	1.71326e+08	1.05545e+07	2.9591	1.5652	0.000276424	0.00160116	Amino acids, peptides, and analogues	Carboxylic acids and derivatives
Pantothenic acid	1.24122	2.50307e+08	1.85716e+07	2.05918e+09	2.70375e+08	0.12156	-3.0403	0.000319794	0.00174973	Polyols	Alcohols and polyols
Diaminopimelic acid	1.24033	8.69414e+06	5.26915e+06	1.09699e+08	1.45777e+07	0.079255	-3.6574	0.000351206	0.00186744	Amino acids, peptides, and analogues	Carboxylic acids and derivatives
2-Dehydropantoate	1.23938	6.40441e+07	3.61614e+06	3.24991e+07	3.39701e+06	1.9706	0.97867	0.000386473	0.00200108	NULL	NULL
1-Methylnicotinamide	1.23904	5.2711e+06	1.27219e+06	1.95513e+07	1.87453e+06	0.2696	-1.8911	0.000399664	0.00204508	Pyridinecarboxylic acids and derivatives	Pyridines and derivatives
Indoleacetaldehyde	1.23842	5.94075e+07	4.40488e+06	2.70482e+07	2.78646e+06	2.1964	1.1351	0.000424008	0.00211235	Indoles	Indoles and derivatives
4a-Carbinolamine tetrahydrobiopterin	1.23743	2.45596e+07	2.81421e+06	4.10722e+06	1.85803e+06	5.9796	2.5801	0.000464321	0.00225627	NULL	NULL
2-trans,6-trans-Farnesal	1.23728	3.50215e+06	419445	845391	131507	4.1426	2.0506	0.000470621	0.002279	Sesquiterpenoids	Prenol lipids
3-AMP	1.23658	1.29349e+09	1.51859e+07	5.0016e+09	6.23083e+08	0.25861	-1.9511	0.000500274	0.00236726	NULL	Ribonucleoside 3'-phosphates
Dehypoxanthine futalosine	1.2365	5.96572e+08	4.99873e+07	2.1021e+09	2.4854e+08	0.2838	-1.8171	0.000503851	0.0023824	NULL	NULL
Argininosuccinic acid	1.23115	3.61894e+09	6.23913e+08	2.90164e+08	6.39483e+06	12.472	3.6406	0.00076241	0.00323902	Amino acids, peptides, and analogues	Carboxylic acids and derivatives
(2R,3R)-3-Methylornithinyl-N6-lysine	1.22991	1.30417e+08	1.81157e+07	3.4221e+07	3.41414e+06	3.811	1.9302	0.000830199	0.00345161	NULL	NULL
N-Acetylhistamine	1.22942	8.10124e+07	5.60003e+06	2.08904e+08	2.40712e+07	0.3878	-1.3666	0.000857259	0.00354545	Carboxylic acid derivatives	Carboxylic acids and derivatives
gamma-Glutamylalanine	1.22939	5.99399e+08	6.21922e+07	1.66908e+08	5.58952e+07	3.5912	1.8445	0.000858973	0.00355138	Amino acids, peptides, and analogues	Carboxylic acids and derivatives
5-(2-Hydroxyethyl)-4-methylthiazole	1.22847	2.91032e+08	2.04076e+07	4.71546e+08	2.89894e+07	0.61719	-0.69622	0.000912214	0.00371798	Thiazoles	Azoles
S-Lactoylglutathione	1.22783	4.20551e+06	739604	1.70494e+07	2.43924e+06	0.24667	-2.0194	0.00094941	0.00383987	Amino acids, peptides, and analogues	Carboxylic acids and derivatives
Tetrahydrodipicolinate	1.22772	5.47528e+06	969839	585026	69111.8	9.359	3.2264	0.000956229	0.00386239	Amino acids, peptides, and analogues	Carboxylic acids and derivatives
N-a-Acetylcitrulline	1.22536	1.06965e+08	1.83682e+07	1.58128e+07	4.03908e+06	6.7644	2.758	0.00110186	0.00428503	Amino acids, peptides, and analogues	Carboxylic acids and derivatives
2-Phenylacetamide	1.22512	6.01869e+09	4.63322e+08	9.86286e+09	6.47366e+08	0.61024	-0.71256	0.00111748	0.00432979	Phenylacetamides	Benzene and substituted derivatives
L-Dopa	1.22259	3.13945e+07	3.66006e+06	1.30701e+07	1.45194e+06	2.402	1.2642	0.00128642	0.00480946	Amino acids, peptides, and analogues	Carboxylic acids and derivatives
Dihydrouracil	1.21685	4.20079e+07	3.56324e+06	9.7864e+06	6.5614e+06	4.2925	2.1018	0.00171266	0.00599122	Pyrimidines and pyrimidine derivatives	Diazines
L-Homocysteine	1.20962	2.63772e+08	6.45954e+07	6.91141e+06	2.38327e+06	38.165	5.2542	0.00233525	0.00766827	NULL	NULL
p-Aminobenzoic acid	1.20954	2.56003e+08	2.63749e+07	1.31872e+08	1.67891e+07	1.9413	0.95702	0.00234292	0.00768547	Benzoic acids and derivatives	Benzene and substituted derivatives
GMP	1.20822	3.2547e+06	363960	4.47561e+07	1.05924e+07	0.072721	-3.7815	0.00246717	0.00798937	Purine ribonucleotides	Purine nucleotides
gamma-Aminobutyric acid	1.2046	8.90615e+09	3.75968e+08	1.48782e+10	1.53614e+09	0.59861	-0.74032	0.00282397	0.00888971	Amino acids, peptides, and analogues	Carboxylic acids and derivatives
Metanephrine	1.20243	4.39508e+06	406971	2.84232e+06	102945	1.5463	0.62882	0.00304916	0.00945725	Methoxyphenols	Phenols
N6-Acetyl-N6-hydroxy-L-lysine	1.201	1.27313e+07	661752	8.17805e+06	1.05733e+06	1.5568	0.63854	0.00320194	0.00982981	NULL	NULL
Nicotinamide riboside	1.20043	1.74209e+07	4.47168e+06	1.15956e+06	239342	15.024	3.9092	0.0032643	0.00998245	Carbohydrates and carbohydrate conjugates	Organooxygen compounds
UMP	1.19961	4.48633e+08	3.20568e+07	2.07913e+08	5.85872e+07	2.1578	1.1096	0.00335501	0.0102105	Pyrimidine ribonucleotides	Pyrimidine nucleotides
1-Pyrroline-2-carboxylic acid	1.19622	2.55962e+08	6.43656e+07	2.50197e+07	1.45623e+07	10.23	3.3548	0.0037403	0.0111131	NULL	Pyrrolines
Prostaglandin I2	1.19618	4.16458e+06	286895	2.69609e+06	306413	1.5447	0.6273	0.00374468	0.0111205	Eicosanoids	Fatty Acyls
Pipecolic acid	1.19516	5.79422e+07	4.2178e+06	3.79355e+07	3.93506e+06	1.5274	0.61107	0.00386522	0.0114032	Amino acids, peptides, and analogues	Carboxylic acids and derivatives
gamma-Glutamyl-beta-aminopropiononitrile	1.19092	1.18757e+08	4.9479e+06	7.06337e+07	1.34838e+07	1.6813	0.74959	0.00438559	0.012658	Amino acids, peptides, and analogues	Carboxylic acids and derivatives
1-Aminocyclopropanecarboxylic acid	1.18557	2.1549e+09	8.84158e+07	1.54736e+09	1.66924e+08	1.3926	0.47781	0.00508756	0.0143466	Amino acids, peptides, and analogues	Carboxylic acids and derivatives
L-Lactic acid	1.17603	1.59243e+09	2.89269e+08	6.36817e+08	1.31126e+08	2.5006	1.3223	0.00646512	0.0174562	Alpha hydroxy acids and derivatives	Hydroxy acids and derivatives
(R) 2,3-Dihydroxy-3-methylvalerate	1.17162	7.40705e+08	9.96539e+07	1.15301e+09	9.9752e+07	0.64241	-0.63844	0.00715651	0.0189826	Fatty acids and conjugates	Fatty Acyls
beta-Alanyl-L-lysine	1.16917	2.69027e+07	1.28955e+06	9.36032e+06	5.95352e+06	2.8741	1.5231	0.00755485	0.0198556	Hybrid peptides	Peptidomimetics
2-Aminoacrylic acid	1.16795	1.43413e+08	2.2277e+07	7.61914e+07	7.54112e+06	1.8823	0.91247	0.00775819	0.0202972	Amino acids, peptides, and analogues	Carboxylic acids and derivatives
meso-2,6-Diaminoheptanedioate	1.1668	1.23513e+08	4.12569e+07	6.0418e+06	3.27319e+06	20.443	4.3535	0.00795092	0.0206773	NULL	NULL
4-Acetamidobutanoic acid	1.1629	8.64472e+07	1.1225e+07	1.23119e+08	6.98713e+06	0.70214	-0.51016	0.00862333	0.0221795	Amino acids, peptides, and analogues	Carboxylic acids and derivatives
L-Histidine	1.16188	9.39022e+09	3.62491e+08	4.46963e+09	1.74742e+09	2.1009	1.071	0.00880366	0.0225561	Amino acids, peptides, and analogues	Carboxylic acids and derivatives
5-Amino-2-oxopentanoic acid	1.16102	3.66595e+06	1.41677e+06	1.43483e+07	3.62668e+06	0.2555	-1.9686	0.00895753	0.0228762	Short-chain keto acids and derivatives	Keto acids and derivatives
11-Dehydro-thromboxane B2	1.15614	1.69057e+06	207031	644782	332571	2.6219	1.3906	0.00985301	0.0246794	Eicosanoids	Fatty Acyls
Glycerophosphocholine	1.15512	5.36935e+09	2.53774e+08	6.65758e+09	4.136e+08	0.8065	-0.31025	0.0100443	0.025079	Glycerophosphocholines	Glycerophospholipids
Chitobiose	1.15497	1.4068e+07	1.124e+06	3.69462e+07	8.55123e+06	0.38077	-1.393	0.0100729	0.0251255	Carbohydrates and carbohydrate conjugates	Organooxygen compounds
Acetylcholine	1.15295	9.03112e+08	9.00937e+07	6.63959e+08	1.38031e+07	1.3602	0.44381	0.0104598	0.0259574	Quaternary ammonium salts	Organonitrogen compounds
L-Isoleucine	1.15194	2.37122e+10	1.80088e+09	9.20818e+09	5.25768e+09	2.5751	1.3646	0.0106559	0.0263202	Amino acids, peptides, and analogues	Carboxylic acids and derivatives
Presqualene diphosphate	1.15145	1.32288e+07	594793	1.00928e+07	1.04764e+06	1.3107	0.39035	0.0107511	0.0265137	NULL	NULL
Phenol	1.14847	7.82953e+07	1.02938e+07	1.11936e+08	8.14521e+06	0.69947	-0.51567	0.0113439	0.0276146	NULL	NULL
NAD	1.14844	8.56843e+07	2.47247e+07	2.86472e+08	7.43558e+07	0.2991	-1.7413	0.0113495	0.0276229	Alcohols and polyols	Organooxygen compounds
L-Threonine	1.14764	1.80248e+09	1.4304e+08	2.3684e+09	1.69468e+08	0.76105	-0.39393	0.0115107	0.0279453	Amino acids, peptides, and analogues	Carboxylic acids and derivatives
N-Acetyl-L-aspartic acid	1.14464	5.72146e+06	3.05507e+06	1.80852e+07	3.85549e+06	0.31636	-1.6604	0.0121256	0.0291193	Amino acids, peptides, and analogues	Carboxylic acids and derivatives
Bovinocidin	1.13659	5.49138e+06	1.23539e+06	9.21625e+06	921528	0.59584	-0.74701	0.0138507	0.0324183	NULL	NULL
Niacinamide	1.11551	4.47724e+08	5.78165e+07	2.94652e+08	3.86319e+07	1.5195	0.6036	0.0188935	0.0420488	Pyridinecarboxylic acids and derivatives	Pyridines and derivatives
gamma-Glutamylcysteine	1.11425	7.21614e+08	9.48812e+06	8.77876e+08	7.07234e+07	0.822	-0.28279	0.0192199	0.0426776	Amino acids, peptides, and analogues	Carboxylic acids and derivatives
myo-Inositol	1.11327	5.36441e+07	1.90906e+07	1.14617e+07	3.09791e+06	4.6803	2.2266	0.0194745	0.0431518	Alcohols and polyols	Organooxygen compounds
3-Dehydrosphinganine	1.1098	1.01024e+07	2.45844e+06	4.80541e+06	150701	2.1023	1.072	0.0203868	0.0448276	Carbonyl compounds	Organooxygen compounds
(3S,5S)-3,5-Diaminohexanoate	1.09284	1.18198e+08	3.83243e+07	3.53929e+07	1.48674e+07	3.3396	1.7397	0.0251461	0.0532543	Amino acids, peptides, and analogues	Carboxylic acids and derivatives
Glycerol 3-phosphate	1.08701	1.38024e+06	190657	2.55647e+08	1.28943e+08	0.005399	-7.5331	0.0268913	0.0562342	NULL	NULL
Diacetyl	1.08284	4.74808e+07	2.1592e+06	1.80429e+07	1.49973e+07	2.6315	1.3959	0.0281715	0.0584183	Carbonyl compounds	Organooxygen compounds
Adenine	1.07278	1.595e+09	3.97498e+08	2.81266e+09	5.12991e+08	0.56708	-0.81838	0.0313808	0.0638272	Purines and purine derivatives	Imidazopyrimidines
Adenylsuccinic acid	1.07265	4.38871e+08	4.40922e+07	9.83838e+08	2.87214e+08	0.44608	-1.1646	0.0314237	0.0639041	Purine ribonucleotides	Purine nucleotides
4-Hydroxycinnamic acid	1.07113	4.54072e+06	2.71902e+06	1.13071e+07	2.39955e+06	0.40158	-1.3162	0.0319223	0.0647099	Hydroxycinnamic acids and derivatives	Cinnamic acids and derivatives
L-Homophenylalanine	1.06847	1.40915e+07	2.20416e+06	1.91813e+07	1.64839e+06	0.73465	-0.44487	0.0328073	0.0661749	NULL	NULL
Adenosine diphosphate ribose	1.05385	1.01022e+07	6.03136e+06	2.92637e+07	9.03781e+06	0.34521	-1.5344	0.0378613	0.0741477	Purine nucleotide sugars	Purine nucleotides
sn-Glycerol 1-phosphate	1.05071	1.28185e+06	482818	3.30954e+07	1.82124e+07	0.038732	-4.6903	0.038991	0.0758399	NULL	NULL
Phenylacetic acid	1.04446	3.42142e+07	1.72702e+07	4.61188e+06	683997	7.4187	2.8912	0.041286	0.0792669	NULL	Benzene and substituted derivatives
7,8-Dihydromonapterin	1.03954	1.05461e+07	5.62998e+06	4.46805e+07	1.94312e+07	0.23603	-2.0829	0.0431372	0.0820536	NULL	NULL
O-Acetyl-L-homoserine	1.03943	3.18304e+07	1.72058e+06	2.61014e+07	2.92845e+06	1.2195	0.28628	0.0431783	0.0820893	NULL	NULL
Cyclic AMP	1.03848	5.6584e+06	3.8483e+06	2.87894e+07	1.32033e+07	0.19654	-2.3471	0.0435398	0.0826275	Cyclic purine nucleotides	Purine nucleotides
N-Acetylputrescine	1.03708	1.72702e+08	2.73411e+07	3.34057e+08	9.23765e+07	0.51698	-0.95181	0.0440742	0.0833789	Carboximidic acids	Carboximidic acids and derivatives
Stearidonic acid	1.03221	2.86028e+07	7.58177e+06	1.27812e+07	5.86248e+06	2.2379	1.1621	0.0459602	0.0863009	Lineolic acids and derivatives	Fatty Acyls
4-Hydroxyphenylpyruvic acid	1.28413	1.48824e+07	1.57597e+06	8.06575e+07	2.38757e+06	0.18451	-2.4382	2.37568e-06	0.000208085	Phenylpyruvic acid derivatives	Benzene and substituted derivatives
D-Lysopine	1.28324	1.56518e+08	6.0331e+06	3.21159e+07	2.98156e+06	4.8735	2.285	5.67209e-06	0.000302901	NULL	NULL
Citric acid	1.28289	1.07577e+08	3.13503e+07	2.1072e+09	1.11222e+08	0.051052	-4.2919	7.3803e-06	0.00033815	Tricarboxylic acids and derivatives	Carboxylic acids and derivatives
Sucrose	1.2783	6.87464e+07	3.13102e+06	2.87243e+07	2.0576e+06	2.3933	1.259	5.0217e-05	0.000860135	NULL	NULL
Hypoxanthine	1.27798	2.34361e+09	1.10882e+08	9.92879e+08	6.61454e+07	2.3604	1.239	5.45435e-05	0.000898834	Purines and purine derivatives	Imidazopyrimidines
6-Phosphogluconic acid	1.27768	7.89948e+08	6.68758e+07	9.95537e+07	7.39985e+06	7.9349	2.9882	5.8892e-05	0.000934248	Carbohydrates and carbohydrate conjugates	Organooxygen compounds
(R)-3-(4-Hydroxyphenyl)lactate	1.27753	2.44688e+07	3.80416e+06	5.51883e+08	5.17397e+07	0.044337	-4.4953	6.10942e-05	0.000953273	NULL	NULL
L-Aspartic acid	1.27729	1.05625e+09	7.49769e+07	3.85936e+09	2.69567e+08	0.27368	-1.8694	6.47416e-05	0.000983883	Amino acids, peptides, and analogues	Carboxylic acids and derivatives
L-Arginine	1.27476	4.73088e+09	4.89658e+08	4.32732e+08	1.02925e+07	10.933	3.4506	0.000109222	0.00131174	Amino acids, peptides, and analogues	Carboxylic acids and derivatives
L-Tryptophan	1.27311	1.41987e+09	1.08089e+08	3.93018e+08	6.40028e+07	3.6127	1.8531	0.000144463	0.00154324	Indolyl carboxylic acids and derivatives	Indoles and derivatives
D-Phenylalanine	1.27272	124032	43304.1	564129	33371.5	0.21986	-2.1853	0.000153459	0.00158696	NULL	NULL
Pyroglutamic acid	1.27034	5.31179e+08	2.65994e+07	9.47259e+07	5.2718e+07	5.6075	2.4874	0.000214551	0.00193311	Amino acids, peptides, and analogues	Carboxylic acids and derivatives
Maleic acid	1.26969	1.05513e+09	3.79853e+07	5.45418e+08	5.92943e+07	1.9345	0.95198	0.000232894	0.00203231	NULL	NULL
L-Lysine	1.26896	3.28156e+09	1.87868e+08	1.43359e+09	1.8137e+08	2.2891	1.1948	0.000254407	0.00215905	Amino acids, peptides, and analogues	Carboxylic acids and derivatives
L-Serine	1.2686	6.16296e+08	4.22353e+07	2.81048e+08	2.25889e+07	2.1929	1.1328	0.000265591	0.00220904	Amino acids, peptides, and analogues	Carboxylic acids and derivatives
L-Malic acid	1.2683	8.77628e+09	6.37442e+08	3.86022e+09	3.09126e+08	2.2735	1.1849	0.000274713	0.00225532	Beta hydroxy acids and derivatives	Hydroxy acids and derivatives
L-Proline	1.26804	4.03346e+08	3.80116e+07	1.38408e+08	5.93181e+06	2.9142	1.5431	0.000283015	0.00229848	Amino acids, peptides, and analogues	Carboxylic acids and derivatives
L-3-Phenyllactic acid	1.266	3.01735e+07	8.58877e+06	1.69741e+08	1.96344e+07	0.17776	-2.492	0.000351964	0.00265194	NULL	Phenylpropanoic acids
Protocatechuic acid	1.26494	8.44726e+06	736816	3.66444e+06	161306	2.3052	1.2049	0.000390519	0.00281666	Benzoic acids and derivatives	Benzene and substituted derivatives
D-Galactose	1.26355	1.88947e+08	2.53278e+07	3.09429e+07	4.68733e+06	6.1063	2.6103	0.000444278	0.00307293	NULL	NULL
Pyrrole-2-carboxylic acid	1.2619	1.67968e+07	1.61573e+06	5.76078e+06	934993	2.9157	1.5439	0.000512725	0.00338676	Pyrrole carboxylic acids and derivatives	Pyrroles
D-Myo-inositol 4-phosphate	1.26016	7.34343e+08	2.46707e+07	5.18065e+08	2.8816e+07	1.4175	0.50332	0.000590009	0.00370139	Alcohols and polyols	Organooxygen compounds
L-4-Hydroxyphenylglycine	1.25843	1.03317e+06	248229	2.37756e+07	4.11843e+06	0.043455	-4.5243	0.000672238	0.00401611	NULL	NULL
Stachyose	1.25745	9.75807e+07	9.06785e+06	4.45695e+07	3.69795e+06	2.1894	1.1305	0.000720852	0.00420754	NULL	NULL
Inosine	1.25358	1.48092e+08	1.46173e+07	5.10334e+07	1.2393e+07	2.9019	1.537	0.000931086	0.00497657	NULL	Purine nucleosides
DL-Glutamate	1.25235	3.53322e+07	2.74759e+06	1.99001e+07	1.4505e+06	1.7755	0.82821	0.00100325	0.00522628	Amino acids, peptides, and analogues	Carboxylic acids and derivatives
5-Hydroxyindoleacetylglycine	1.2518	1.92051e+07	1.42412e+06	3.99663e+07	3.96718e+06	0.48053	-1.0573	0.00103596	0.00534782	NULL	NULL
4,5-Dihydroorotic acid	1.25175	5.57183e+06	2.08788e+06	4.4558e+09	9.04283e+08	0.0012505	-9.6433	0.00103936	0.00536053	Amino acids, peptides, and analogues	Carboxylic acids and derivatives
Adenosine	1.24918	2.774e+08	8.36285e+06	4.37277e+08	3.26938e+07	0.63438	-0.65658	0.00120187	0.00594803	NULL	Purine nucleosides
2-Isopropylmalic acid	1.24765	5.85442e+08	6.19467e+07	2.97185e+08	5.08446e+06	1.97	0.97817	0.00130347	0.00629039	Fatty acids and conjugates	Fatty Acyls
Nicotinic acid adenine dinucleotide	1.2476	91.8611	0	6.93076e+06	1.49544e+06	1.3254e-05	-16.203	0.00130688	0.0063011	NULL	NULL
(R)-2-Methylmalate	1.24675	91.8611	0	9.001e+07	1.9647e+07	1.0206e-06	-19.902	0.0013655	0.00650068	NULL	NULL
Succinic acid	1.24614	1.04713e+09	2.20865e+08	3.34845e+09	4.55759e+08	0.31272	-1.677	0.00140869	0.00664246	Dicarboxylic acids and derivatives	Carboxylic acids and derivatives
Cytidine	1.24562	2.66354e+07	1.29818e+06	8.74992e+06	3.74425e+06	3.0441	1.606	0.00144546	0.00676955	NULL	NULL
Salicylic acid	1.24097	730238	134559	89622.6	67130.5	8.1479	3.0264	0.00179817	0.00789868	Benzoic acids and derivatives	Benzene and substituted derivatives
Citrulline	1.23859	6.03003e+07	5.88627e+07	3.35131e+08	3.05066e+07	0.17993	-2.4745	0.0019929	0.00851347	Amino acids, peptides, and analogues	Carboxylic acids and derivatives
dGMP	1.23319	1.95756e+08	4.31957e+07	1.25754e+09	2.67846e+08	0.15567	-2.6835	0.00247224	0.00997009	Purine deoxyribonucleotides	Purine nucleotides
5-Hydroxy-L-tryptophan	1.23134	2.76907e+07	2.8002e+06	1.11917e+07	3.25536e+06	2.4742	1.307	0.00264745	0.0104899	Tryptamines and derivatives	Indoles and derivatives
N6-Acetyl-LL-2,6-diaminoheptanedioate	1.22958	1.95953e+08	4.6392e+07	1.84893e+07	7.40507e+06	10.598	3.4057	0.00282041	0.0109829	NULL	NULL
Fructose 1,6-bisphosphate	1.22205	1.02201e+08	2.2334e+07	2.25951e+07	3.08177e+06	4.5231	2.1773	0.00361977	0.0131983	Carbohydrates and carbohydrate conjugates	Organooxygen compounds
Imidazoleacetic acid	1.22149	1.19341e+08	4.14634e+06	5.84097e+07	1.68366e+07	2.0432	1.0308	0.00368412	0.0133692	Imidazoles	Azoles
Prunasin	1.21797	2.48922e+07	1.34711e+06	6.79796e+07	1.25482e+07	0.36617	-1.4494	0.00409462	0.0144538	NULL	NULL
Phosphoribosyl pyrophosphate	1.21614	40436.5	27526.5	1.91879e+06	557511	0.021074	-5.5684	0.00431686	0.0150341	Carbohydrates and carbohydrate conjugates	Organooxygen compounds
Phenylpyruvic acid	1.21078	3.07669e+07	2.54056e+06	5.1421e+07	5.86416e+06	0.59833	-0.74098	0.00499966	0.0168319	Phenylpyruvic acid derivatives	Benzene and substituted derivatives
3,4-Dihydroxybenzeneacetic acid	1.20734	2.3216e+06	708891	5.57841e+06	751149	0.41617	-1.2647	0.00546434	0.0180096	Benzenediols	Phenols
Sorbitol	1.20466	1.81688e+07	5.79499e+06	9.06204e+07	2.26773e+07	0.20049	-2.3184	0.0058407	0.0189264	Carbohydrates and carbohydrate conjugates	Organooxygen compounds
trans-Cinnamate	1.20189	2.1096e+07	5.66006e+06	5.0164e+07	7.71178e+06	0.42054	-1.2497	0.00624111	0.0198915	NULL	NULL
L-Arabitol	1.19716	2.56995e+06	1.59204e+06	3.22718e+07	9.94995e+06	0.079634	-3.6505	0.00695616	0.0215678	Carbohydrates and carbohydrate conjugates	Organooxygen compounds
dAMP	1.19616	1.40627e+06	53692.5	5.1129e+06	1.26426e+06	0.27504	-1.8623	0.0071127	0.021933	Purine deoxyribonucleotides	Purine nucleotides
Glutathione	1.19053	1.18441e+09	2.20491e+08	4.039e+09	9.83888e+08	0.29324	-1.7698	0.00802294	0.0240658	NULL	NULL
D-Glyceraldehyde 3-phosphate	1.18918	2.74512e+08	8.80387e+07	2.7005e+07	3.65455e+06	10.165	3.3456	0.00824827	0.0245743	NULL	NULL
Gluconic acid	1.1884	7.43459e+08	1.42269e+08	2.45408e+08	1.07177e+08	3.0295	1.5991	0.00838166	0.0248875	Carbohydrates and carbohydrate conjugates	Organooxygen compounds
Oxidized glutathione	1.17696	6.66045e+07	760693	9.36367e+07	1.02671e+07	0.71131	-0.49145	0.0104347	0.0295025	Amino acids, peptides, and analogues	Carboxylic acids and derivatives
Stearic acid	1.17567	1.39302e+07	9.70609e+06	1.62577e+08	5.61619e+07	0.085683	-3.5448	0.0106798	0.0299925	Fatty acids and conjugates	Fatty Acyls
Carbamoylaspartate	1.17034	3.77282e+06	241566	3.81129e+09	1.49997e+09	0.00098991	-9.9804	0.011722	0.032262	NULL	NULL
Shikimic acid	1.16511	91.8611	0	1.84591e+07	7.46062e+06	4.9765e-06	-17.616	0.0127924	0.0345189	Alcohols and polyols	Organooxygen compounds
Nicotinic acid	1.16282	3.68968e+08	2.81883e+07	2.96222e+08	9.4309e+06	1.2456	0.31682	0.0132747	0.0354999	Pyridinecarboxylic acids and derivatives	Pyridines and derivatives
6-Hydroxynicotinic acid	1.15728	1.7275e+07	1.02699e+06	1.43267e+07	687711	1.2058	0.26998	0.0144744	0.0380095	Pyridinecarboxylic acids and derivatives	Pyridines and derivatives
L-Cystathionine	1.15366	1.82697e+08	2.35903e+07	8.52259e+07	3.41829e+07	2.1437	1.1001	0.0152875	0.039678	Amino acids, peptides, and analogues	Carboxylic acids and derivatives
D-Myo-inositol 3,4,5,6-tetrakisphosphate	1.13283	4.5195e+06	1.84979e+06	533737	109557	8.4677	3.082	0.020376	0.0493133	Alcohols and polyols	Organooxygen compounds
Orotidylic acid	1.12154	3.96555e+06	689962	1.34941e+09	6.53198e+08	0.0029387	-8.4106	0.0234249	0.0548367	Pyrimidine ribonucleotides	Pyrimidine nucleotides
alpha-Ketoisovaleric acid	1.12123	91.8611	0	1.97921e+06	961915	4.6413e-05	-14.395	0.0235091	0.0549771	Short-chain keto acids and derivatives	Keto acids and derivatives
Traumatic Acid	1.10979	4.82618e+06	545173	5.90855e+06	59118.9	0.81681	-0.29192	0.0268118	0.0608428	NULL	NULL
N-Acetylglutamic acid	1.10865	2.60129e+07	2.49079e+06	1.83435e+07	3.0025e+06	1.4181	0.50396	0.0271498	0.0614132	Amino acids, peptides, and analogues	Carboxylic acids and derivatives
Thymidine	1.09814	1.14831e+08	1.10337e+06	1.24639e+08	5.05407e+06	0.9213	-0.11825	0.0303818	0.0669598	Pyrimidine 2'-deoxyribonucleosides	Pyrimidine nucleosides
(3S)-3,6-Diaminohexanoate	1.09546	3.00027e+06	1.8976e+06	6.66328e+06	445899	0.45027	-1.1511	0.031234	0.0683913	NULL	NULL
Trehalose	1.08485	5.59095e+08	6.26085e+07	4.33149e+08	2.99055e+07	1.2908	0.36823	0.0347127	0.0740347	Carbohydrates and carbohydrate conjugates	Organooxygen compounds
Uridine diphosphate glucose	1.05972	9.27094e+07	2.33746e+07	4.88641e+07	1.15875e+07	1.8973	0.92394	0.0436398	0.0880068	Pyrimidine nucleotide sugars	Pyrimidine nucleotides
Pseudouridine	1.05324	2.87888e+08	1.40811e+08	5.54371e+07	6.23688e+06	5.1931	2.3766	0.0460931	0.0917291	NULL	Nucleoside and nucleotide analogues
3-Hydroxyanthranilic acid	1.0437	2.08516e+07	1.25912e+07	641888	121900	32.485	5.0217	0.0498222	0.0973059	Benzoic acids and derivatives	Benzene and substituted derivatives
