# Supplementary material for: Metabolome and Transcriptome Profiling Reveal Carbon Metabolic Flux Changes in Yarrowia lipolytica Cells to Rapamycin
Source: J Fungi (Basel). 2022 Sep 6;8(9):939. doi: 10.3390/jof8090939 (PMC9504542; doi:10.3390/jof8090939)
Supplement: Supplementary file 1 [file jof-08-00939-s001.zip › Table S3.xlsx]

## Sheet: Table S3
Table S3: The metabolic pathways obtained from MetPA analysis.
	Total	Hits	Raw p	=-LOG(p)	Holm adjust	FDR	Impact	compounds	pathway	links
Nicotinate and nicotinamide metabolism	9	6	0.0033778	5.6905	0.21956	0.21956	0.69354	C00857;C00153;C00455;C03150;C00253;C00003	sce00760	http://www.kegg.jp/pathway/sce00760+C00857+C00153+C00455+C03150+C00253+C00003
Arginine and proline metabolism	37	13	0.025697	3.6614	1	0.77149	0.51715	C00327;C00049;C03406;C00062;C00025;C00624;C01250;C00148;C01165;C00019;C00064;C00334;C02946	sce00330	http://www.kegg.jp/pathway/sce00330+C00327+C00049+C03406+C00062+C00025+C00624+C01250+C00148+C01165+C00019+C00064+C00334+C02946
Alanine, aspartate and glutamate metabolism	20	8	0.035607	3.3352	1	0.77149	0.90686	C00049;C03406;C03794;C00064;C00025;C00334;C00438;C00042	sce00250	http://www.kegg.jp/pathway/sce00250+C00049+C03406+C03794+C00064+C00025+C00334+C00438+C00042
Nitrogen metabolism	8	4	0.060684	2.8021	1	0.98612	0	C00025;C00064;C02291;C00049	sce00910	http://www.kegg.jp/pathway/sce00910+C00025+C00064+C02291+C00049
Phenylalanine, tyrosine and tryptophan biosynthesis	22	7	0.14564	1.9266	1	1	0.13731	C00463;C00166;C00493;C00082;C00078;C00119;C01179	sce00400	http://www.kegg.jp/pathway/sce00400+C00463+C00166+C00493+C00082+C00078+C00119+C01179
Phenylalanine metabolism	7	3	0.15702	1.8514	1	1	0.6	C00166;C02505;C07086	sce00360	http://www.kegg.jp/pathway/sce00360+C00166+C02505+C07086
Pyrimidine metabolism	35	10	0.16179	1.8214	1	1	0.41063	C00064;C00337;C01103;C00105;C00299;C00475;C00380;C00106;C00438;C00119	sce00240	http://www.kegg.jp/pathway/sce00240+C00064+C00337+C01103+C00105+C00299+C00475+C00380+C00106+C00438+C00119
Glutathione metabolism	23	6	0.32876	1.1124	1	1	0.83334	C00051;C00127;C00669;C00025;C01419;C03740	sce00480	http://www.kegg.jp/pathway/sce00480+C00051+C00127+C00669+C00025+C01419+C03740
Cyanoamino acid metabolism	10	3	0.33892	1.082	1	1	0	C00049;C06114;C00065	sce00460	http://www.kegg.jp/pathway/sce00460+C00049+C06114+C00065
Cysteine and methionine metabolism	33	8	0.36332	1.0125	1	1	0.44666	C00019;C02291;C00155;C00065;C00021;C01077;C00049;C02218	sce00270	http://www.kegg.jp/pathway/sce00270+C00019+C02291+C00155+C00065+C00021+C01077+C00049+C02218
beta-Alanine metabolism	7	2	0.43904	0.82318	1	1	0	C00049;C00864	sce00410	http://www.kegg.jp/pathway/sce00410+C00049+C00864
Galactose metabolism	17	4	0.47522	0.74398	1	1	0.17949	C01613;C00089;C00124;C00029	sce00052	http://www.kegg.jp/pathway/sce00052+C01613+C00089+C00124+C00029
Pentose phosphate pathway	18	4	0.52418	0.64591	1	1	0.17996	C00118;C00345;C00257;C00119	sce00030	http://www.kegg.jp/pathway/sce00030+C00118+C00345+C00257+C00119
Valine, leucine and isoleucine biosynthesis	24	5	0.56937	0.56323	1	1	0.22879	C00188;C06007;C02504;C00141;C00407	sce00290	http://www.kegg.jp/pathway/sce00290+C00188+C06007+C02504+C00141+C00407
Tyrosine metabolism	19	4	0.57088	0.56057	1	1	0	C00082;C01161;C01179;C00042	sce00350	http://www.kegg.jp/pathway/sce00350+C00082+C01161+C01179+C00042
Lysine biosynthesis	19	4	0.57088	0.56057	1	1	0.03929	C00049;C00449;C04390;C00047	sce00300	http://www.kegg.jp/pathway/sce00300+C00049+C00449+C04390+C00047
Glyoxylate and dicarboxylate metabolism	14	3	0.57422	0.55475	1	1	0.22464	C00158;C00149;C00042	sce00630	http://www.kegg.jp/pathway/sce00630+C00158+C00149+C00042
Purine metabolism	60	12	0.59884	0.51276	1	1	0.09092	C00119;C00064;C00575;C03794;C00212;C00294;C00144;C00362;C00301;C00147;C00360;C00262	sce00230	http://www.kegg.jp/pathway/sce00230+C00119+C00064+C00575+C03794+C00212+C00294+C00144+C00362+C00301+C00147+C00360+C00262
Glycine, serine and threonine metabolism	26	5	0.64656	0.43609	1	1	0.32448	C00065;C02291;C00049;C00188;C00078	sce00260	http://www.kegg.jp/pathway/sce00260+C00065+C02291+C00049+C00188+C00078
Histidine metabolism	16	3	0.67079	0.39931	1	1	0.0708	C00135;C02835;C00119	sce00340	http://www.kegg.jp/pathway/sce00340+C00135+C02835+C00119
Pantothenate and CoA biosynthesis	16	3	0.67079	0.39931	1	1	0.59183	C00864;C00141;C00966	sce00770	http://www.kegg.jp/pathway/sce00770+C00864+C00141+C00966
Thiamine metabolism	11	2	0.69591	0.36253	1	1	0	C00378;C04294	sce00730	http://www.kegg.jp/pathway/sce00730+C00378+C04294
Vitamin B6 metabolism	11	2	0.69591	0.36253	1	1	0.01923	C00118;C00534	sce00750	http://www.kegg.jp/pathway/sce00750+C00118+C00534
Sphingolipid metabolism	11	2	0.69591	0.36253	1	1	0.1619	C00065;C02934	sce00600	http://www.kegg.jp/pathway/sce00600+C00065+C02934
Butanoate metabolism	17	3	0.71269	0.3387	1	1	0.28571	C00334;C00025;C00042	sce00650	http://www.kegg.jp/pathway/sce00650+C00334+C00025+C00042
Pyruvate metabolism	23	4	0.72931	0.31566	1	1	0.32001	C03451;C00256;C00149;C02504	sce00620	http://www.kegg.jp/pathway/sce00620+C03451+C00256+C00149+C02504
Pentose and glucuronate interconversions	12	2	0.7427	0.29746	1	1	0	C00532;C00029	sce00040	http://www.kegg.jp/pathway/sce00040+C00532+C00029
Starch and sucrose metabolism	18	3	0.75039	0.28716	1	1	0.15497	C00089;C00029;C01083	sce00500	http://www.kegg.jp/pathway/sce00500+C00089+C00029+C01083
Aminoacyl-tRNA biosynthesis	67	12	0.75903	0.27571	1	1	0.09302	C00135;C00062;C00064;C00049;C00065;C00047;C00407;C00188;C00078;C00082;C00148;C00025	sce00970	http://www.kegg.jp/pathway/sce00970+C00135+C00062+C00064+C00049+C00065+C00047+C00407+C00188+C00078+C00082+C00148+C00025
Sulfur metabolism	13	2	0.78322	0.24435	1	1	0	C01077;C00155	sce00920	http://www.kegg.jp/pathway/sce00920+C01077+C00155
Inositol phosphate metabolism	19	3	0.78405	0.24328	1	1	0.16364	C03546;C00137;C00118	sce00562	http://www.kegg.jp/pathway/sce00562+C03546+C00137+C00118
Biotin metabolism	7	1	0.80163	0.22111	1	1	0.22857	C01909	sce00780	http://www.kegg.jp/pathway/sce00780+C01909
Citrate cycle (TCA cycle)	20	3	0.8139	0.20592	1	1	0.1752	C00042;C00149;C00158	sce00020	http://www.kegg.jp/pathway/sce00020+C00042+C00149+C00158
Tryptophan metabolism	27	4	0.83985	0.17454	1	1	0.42307	C00078;C00643;C00632;C00637	sce00380	http://www.kegg.jp/pathway/sce00380+C00078+C00643+C00632+C00637
Valine, leucine and isoleucine degradation	16	2	0.8731	0.13571	1	1	0	C00407;C00141	sce00280	http://www.kegg.jp/pathway/sce00280+C00407+C00141
Lysine degradation	16	2	0.8731	0.13571	1	1	0.13333	C00449;C00047	sce00310	http://www.kegg.jp/pathway/sce00310+C00449+C00047
Fructose and mannose metabolism	17	2	0.89449	0.11151	1	1	0.16727	C00794;C00118	sce00051	http://www.kegg.jp/pathway/sce00051+C00794+C00118
Methane metabolism	11	1	0.92182	0.081406	1	1	0.16667	C00065	sce00680	http://www.kegg.jp/pathway/sce00680+C00065
Riboflavin metabolism	11	1	0.92182	0.081406	1	1	0.27586	C00255	sce00740	http://www.kegg.jp/pathway/sce00740+C00255
Glycerophospholipid metabolism	26	3	0.92879	0.073876	1	1	0.11999	C00588;C00093;C00670	sce00564	http://www.kegg.jp/pathway/sce00564+C00588+C00093+C00670
Propanoate metabolism	14	1	0.96124	0.039533	1	1	0	C00042	sce00640	http://www.kegg.jp/pathway/sce00640+C00042
Glycerolipid metabolism	15	1	0.96934	0.031139	1	1	0.28125	C00093	sce00561	http://www.kegg.jp/pathway/sce00561+C00093
Amino sugar and nucleotide sugar metabolism	24	2	0.97279	0.02759	1	1	0	C00029;C00124	sce00520	http://www.kegg.jp/pathway/sce00520+C00029+C00124
Folate biosynthesis	18	1	0.98486	0.015259	1	1	0	C00568	sce00790	http://www.kegg.jp/pathway/sce00790+C00568
Porphyrin and chlorophyll metabolism	20	1	0.99055	0.0094924	1	1	0	C00025	sce00860	http://www.kegg.jp/pathway/sce00860+C00025
Steroid biosynthesis	23	1	0.99536	0.004655	1	1	0.05674	C03428	sce00100	http://www.kegg.jp/pathway/sce00100+C03428
Glycolysis or Gluconeogenesis	24	1	0.99634	0.0036697	1	1	0.09422	C00118	sce00010	http://www.kegg.jp/pathway/sce00010+C00118
Biosynthesis of unsaturated fatty acids	42	1	0.99995	4.83e-05	1	1	0	C01530	sce01040	http://www.kegg.jp/pathway/sce01040+C01530
