# Supplementary material for: Metabolome and Transcriptome Profiling Reveal Carbon Metabolic Flux Changes in Yarrowia lipolytica Cells to Rapamycin
Source: J Fungi (Basel). 2022 Sep 6;8(9):939. doi: 10.3390/jof8090939 (PMC9504542; doi:10.3390/jof8090939)
Supplement: Supplementary file 1 [file jof-08-00939-s001.zip › Table S4.xlsx]

## Sheet: Sheet1
Table S4: The up-regulated genes.
id	baseMean	baseMeanA	baseMeanB	foldChange	log2FoldChange	pval	padj	Chromosome	Start Site	End Site	Direction	Length	Name	GO	KEGG	EC	Description	locus_tag	old_locus_tag	Dbxref_GeneID
gene1019	11622.7	21.2179	23224.2	1094.55	10.0961	0	0	NC_006068.1	557357	559573	+	2217	YALI0_B04202g	GO:0005886;GO:0015204;GO:0015489;GO:0015606;GO:0015840;GO:0015847;GO:0015848;GO:0016020;GO:0016021;GO:0022857;GO:0055085;GO:0071918;GO:1903711	K20989	-	YALI0B04202p [Yarrowia lipolytica CLIB122]	YALI0_B04202g	YALI0B04202g	2907479
gene1033	1929.7	462.799	3396.61	7.33928	2.87564	0	0	NC_006068.1	606429	607418	-	990	YALI0_B04510g	GO:0000981;GO:0005634;GO:0006355;GO:0006357;GO:0008270	K21632	-	YALI0B04510p [Yarrowia lipolytica CLIB122]	YALI0_B04510g	YALI0B04510g	2907563
gene1045	3054.59	540.703	5568.48	10.2986	3.36438	0	0	NC_006068.1	656274	657451	-	855	YALI0_B04796g	-	-	-	YALI0B04796p [Yarrowia lipolytica CLIB122]	YALI0_B04796g	YALI0B04796g	2906918
gene105	1671.68	95.8982	3247.47	33.8637	5.08167	0	0	NC_006067.1	323454	324740	-	1287	YALI0_A02607g	GO:0016787;GO:0016813	-	-	YALI0A02607p [Yarrowia lipolytica CLIB122]	YALI0_A02607g	YALI0A02607g	2906436
gene1080	22286.9	92.0613	44481.7	483.175	8.9164	0	0	NC_006068.1	766032	767225	+	1194	YALI0_B05654g	GO:0004190;GO:0005576;GO:0006508;GO:0008233;GO:0009277;GO:0016787;GO:0030163;GO:0031505	-	-	YALI0B05654p [Yarrowia lipolytica CLIB122]	YALI0_B05654g	YALI0B05654g	2907455
gene1112	55781.6	15018.5	96544.8	6.42839	2.68446	0	0	NC_006068.1	862630	863781	+	1152	YALI0_B06413g	GO:0003824;GO:0003959;GO:0010181;GO:0016491;GO:0055114	-	-	YALI0B06413p [Yarrowia lipolytica CLIB122]	YALI0_B06413g	YALI0B06413g	2907588
gene1215	8860.66	2552.44	15168.9	5.9429	2.57117	0	0	NC_006068.1	1226312	1226984	-	615	YALI0_B08965g	GO:0005758;GO:0005829;GO:0008686;GO:0009060;GO:0009231;GO:0016829;GO:0046872	K02858	[EC:4.1.99.12]	YALI0B08965p [Yarrowia lipolytica CLIB122]	YALI0_B08965g	YALI0B08965g	2906813
gene1244	22059.9	4205.94	39913.8	9.48988	3.24639	0	0	NC_006068.1	1317745	1319253	-	1509	YALI0_B09625g	GO:0004657;GO:0005739;GO:0006560;GO:0006562;GO:0010133;GO:0016491;GO:0055114;GO:0071949	K00318	[EC:1.5.5.2]	YALI0B09625p [Yarrowia lipolytica CLIB122]	YALI0_B09625g	YALI0B09625g	2907162
gene1382	1369.35	263.868	2474.82	9.37902	3.22944	0	0	NC_006068.1	1714798	1715481	+	684	YALI0_B12760g	-	-	-	YALI0B12760p [Yarrowia lipolytica CLIB122]	YALI0_B12760g	YALI0B12760g	2906726
gene1537	17981.4	301.046	35661.8	118.46	6.88825	0	0	NC_006068.1	2136845	2137939	-	1095	YALI0_B16214g	GO:0003941;GO:0004794;GO:0006520;GO:0006565;GO:0006567;GO:0030170	K17989	-	YALI0B16214p [Yarrowia lipolytica CLIB122]	YALI0_B16214g	YALI0B16214g	2906629
gene1689	14939.5	4751.4	25127.5	5.28844	2.40284	0	0	NC_006068.1	2581895	2583916	+	2022	YALI0_B19580g	GO:0004177;GO:0005737;GO:0006508;GO:0008233;GO:0008237;GO:0008239;GO:0016787;GO:0046872	K01277	[EC:3.4.14.4]	YALI0B19580p [Yarrowia lipolytica CLIB122]	YALI0_B19580g	YALI0B19580g	2907247
gene170	1863.53	21.1794	3705.89	174.976	7.45101	0	0	NC_006067.1	465608	466456	-	849	YALI0_A04323g	GO:0005634	-	-	YALI0A04323p [Yarrowia lipolytica CLIB122]	YALI0_A04323g	YALI0A04323g	2906273
gene1706	1642.66	254.571	3030.75	11.9053	3.57353	0	0	NC_006068.1	2626287	2633187	-	6360	YALI0_B19998g	GO:0003824;GO:0005506;GO:0006537;GO:0006807;GO:0010181;GO:0015930;GO:0016040;GO:0016491;GO:0016638;GO:0016639;GO:0019676;GO:0050660;GO:0051536;GO:0051538;GO:0055114	K00264	[EC:1.4.1.14]	YALI0B19998p [Yarrowia lipolytica CLIB122]	YALI0_B19998g	YALI0B19998g	2907005
gene1720	13557.1	103.374	27010.7	261.292	8.02952	0	0	NC_006068.1	2684937	2685389	-	453	YALI0_B20328g	GO:0006473;GO:0008080;GO:0016746	K18852	[EC:2.3.1.36]	YALI0B20328p [Yarrowia lipolytica CLIB122]	YALI0_B20328g	YALI0B20328g	2906694
gene1767	8448.56	1289	15608.1	12.1087	3.59797	0	0	NC_006068.1	2792141	2793751	-	1611	YALI0_B21318g	-	-	-	YALI0B21318p [Yarrowia lipolytica CLIB122]	YALI0_B21318g	YALI0B21318g	2906862
gene1775	2417.66	134.486	4700.84	34.9542	5.12739	0	0	NC_006068.1	2819896	2821347	+	1452	YALI0_B21494g	GO:0003676;GO:0004523;GO:0043137;GO:0090502	-	-	YALI0B21494p [Yarrowia lipolytica CLIB122]	YALI0_B21494g	YALI0B21494g	2907429
gene1793	37954.8	1586.36	74323.2	46.8513	5.55002	0	0	NC_006068.1	2865746	2866930	-	1185	YALI0_B21846g	GO:0003868;GO:0006559;GO:0006572;GO:0009072;GO:0016491;GO:0016701;GO:0046872;GO:0051213;GO:0055114	K00457	[EC:1.13.11.27]	YALI0B21846p [Yarrowia lipolytica CLIB122]	YALI0_B21846g	YALI0B21846g	2907146
gene1794	4993.07	1045.23	8940.91	8.55404	3.09661	0	0	NC_006068.1	2867979	2868650	-	672	YALI0_B21868g	GO:0005515;GO:0060271	-	-	YALI0B21868p [Yarrowia lipolytica CLIB122]	YALI0_B21868g	YALI0B21868g	2907147
gene1866	4445.59	3.57031	8887.61	2489.31	11.2815	0	0	NC_006068.1	3050828	3051673	+	846	YALI0_B23452g	-	-	-	YALI0B23452p [Yarrowia lipolytica CLIB122]	YALI0_B23452g	YALI0B23452g	2906728
gene1895	8061.64	1922.08	14201.2	7.38846	2.88527	0	0	NC_006069.1	83482	84180	+	699	YALI0_C00649g	-	-	-	YALI0C00649p [Yarrowia lipolytica CLIB122]	YALI0_C00649g	YALI0C00649g	2909182
gene2014	21872.3	9460.29	34284.4	3.62403	1.85759	0	0	NC_006069.1	457607	458086	+	480	YALI0_C03465g	GO:0000302;GO:0006457;GO:0009408;GO:0009651;GO:0043621;GO:0051082;GO:0051259	-	-	YALI0C03465p [Yarrowia lipolytica CLIB122]	YALI0_C03465g	YALI0C03465g	2909288
gene2019	1797.45	102.685	3492.22	34.0091	5.08785	0	0	NC_006069.1	471116	472597	-	1482	YALI0_C03564g	GO:0046983	-	-	YALI0C03564p [Yarrowia lipolytica CLIB122]	YALI0_C03564g	YALI0C03564g	2909907
gene2030	2558.19	89.7485	5026.63	56.008	5.80756	0	0	NC_006069.1	502377	502787	-	411	YALI0_C03806g	-	-	-	YALI0C03806p [Yarrowia lipolytica CLIB122]	YALI0_C03806g	YALI0C03806g	2909918
gene2058	10206.2	1064.02	19348.3	18.1843	4.18462	0	0	NC_006069.1	592922	593707	-	786	YALI0_C04455g	GO:0016020;GO:0016021	-	-	YALI0C04455p [Yarrowia lipolytica CLIB122]	YALI0_C04455g	YALI0C04455g	2909647
gene2088	7542.61	735.53	14349.7	19.5093	4.28609	0	0	NC_006069.1	667043	668641	-	1599	YALI0_C05258g	GO:0003824;GO:0006571;GO:0008483;GO:0008793;GO:0009058;GO:0009073;GO:0030170;GO:0047536;GO:1901605	K05821	-	YALI0C05258p [Yarrowia lipolytica CLIB122]	YALI0_C05258g	YALI0C05258g	2909373
gene2108	7450.72	2582.23	12319.2	4.77076	2.25422	0	0	NC_006069.1	729326	729994	-	669	YALI0_C05687g	-	-	-	YALI0C05687p [Yarrowia lipolytica CLIB122]	YALI0_C05687g	YALI0C05687g	2910106
gene2138	3600.38	754.053	6446.71	8.54942	3.09583	0	0	NC_006069.1	823060	824691	-	1632	YALI0_C06347g	GO:0000329;GO:0005768;GO:0005773;GO:0005774;GO:0006623;GO:0006914;GO:0015031;GO:0016020;GO:0031902;GO:0032585;GO:0035658	K20195	-	YALI0C06347p [Yarrowia lipolytica CLIB122]	YALI0_C06347g	YALI0C06347g	2909308
gene2147	987.959	172.891	1803.03	10.4287	3.38249	0	0	NC_006069.1	875910	876224	-	315	YALI0_C06534g	-	-	-	YALI0C06534p [Yarrowia lipolytica CLIB122]	YALI0_C06534g	YALI0C06534g	2909318
gene2267	4092.07	1225.76	6958.37	5.67678	2.50507	0	0	NC_006069.1	1264080	1265654	+	1575	YALI0_C09232g	GO:0000432;GO:0005634;GO:0043565	-	-	YALI0C09232p [Yarrowia lipolytica CLIB122]	YALI0_C09232g	YALI0C09232g	2909715
gene228	1521.99	214.71	2829.28	13.1772	3.71997	0	0	NC_006067.1	585645	586796	-	1152	YALI0_A05885g	-	-	-	YALI0A05885p [Yarrowia lipolytica CLIB122]	YALI0_A05885g	YALI0A05885g	2906006
gene2348	7707.25	32.5866	15381.9	472.031	8.88274	0	0	NC_006069.1	1536684	1540028	-	3345	YALI0_C11165g	-	-	-	YALI0C11165p [Yarrowia lipolytica CLIB122]	YALI0_C11165g	YALI0C11165g	2909144
gene2412	1840.53	189.161	3491.91	18.46	4.20633	0	0	NC_006069.1	1755997	1757271	-	1275	YALI0_C12595g	-	-	-	YALI0C12595p [Yarrowia lipolytica CLIB122]	YALI0_C12595g	YALI0C12595g	2909506
gene2443	11439.4	4689.32	18189.6	3.87894	1.95566	0	0	NC_006069.1	1857868	1858809	+	942	YALI0_C13508g	GO:0004032;GO:0005829;GO:0008106;GO:0016491;GO:0055114	-	-	YALI0C13508p [Yarrowia lipolytica CLIB122]	YALI0_C13508g	YALI0C13508g	2909202
gene2504	1088.93	10.4795	2167.38	206.822	7.69224	0	0	NC_006069.1	2076144	2076689	-	546	YALI0_C15004g	-	-	-	YALI0C15004p [Yarrowia lipolytica CLIB122]	YALI0_C15004g	YALI0C15004g	2909345
gene2517	1993.84	406.356	3581.32	8.81325	3.13967	0	0	NC_006069.1	2129492	2130460	-	969	YALI0_C15246g	-	-	-	YALI0C15246p [Yarrowia lipolytica CLIB122]	YALI0_C15246g	YALI0C15246g	2909354
gene2598	7487.24	717.309	14257.2	19.8759	4.31295	0	0	NC_006069.1	2426341	2428221	+	1881	YALI0_C17237g	GO:0003333;GO:0006865;GO:0015171;GO:0016020;GO:0016021;GO:0022857;GO:0055085	K16261	-	YALI0C17237p [Yarrowia lipolytica CLIB122]	YALI0_C17237g	YALI0C17237g	2910090
gene273	99692.2	4750.46	194634	40.9715	5.35655	0	0	NC_006067.1	677040	678158	+	1119	YALI0_A06974g	GO:0016491;GO:0055114	K23516	[EC:1.14.11.48]	YALI0A06974p [Yarrowia lipolytica CLIB122]	YALI0_A06974g	YALI0A06974g	2906404
gene2745	2194.99	276.594	4113.39	14.8716	3.89449	0	0	NC_006069.1	2771304	2773022	+	1719	YALI0_C20669g	-	K00681	-	YALI0C20669p [Yarrowia lipolytica CLIB122]	YALI0_C20669g	YALI0C20669g	2909890
gene2762	10274	1960.44	18587.6	9.4813	3.24508	0	0	NC_006069.1	2815693	2816364	+	672	YALI0_C21021g	GO:0005515	K00799	[EC:2.5.1.18]	YALI0C21021p [Yarrowia lipolytica CLIB122]	YALI0_C21021g	YALI0C21021g	2909874
gene2839	2673.49	310.064	5036.91	16.2447	4.0219	0	0	NC_006069.1	3049823	3051010	+	1188	YALI0_C22748g	-	-	-	YALI0C22748p [Yarrowia lipolytica CLIB122]	YALI0_C22748g	YALI0C22748g	2909672
gene2844	1616.09	301.735	2930.45	9.71201	3.27977	0	0	NC_006069.1	3063710	3063910	-	201	YALI0_C22836g	GO:0005199;GO:0005618;GO:0016020;GO:0016021	-	-	YALI0C22836p [Yarrowia lipolytica CLIB122]	YALI0_C22836g	YALI0C22836g	2909636
gene2935	31562.1	11625.9	51498.3	4.4296	2.14718	0	0	NC_006070.1	45642	47396	-	1755	YALI0_D00451g	-	-	-	YALI0D00451p [Yarrowia lipolytica CLIB122]	YALI0_D00451g	YALI0D00451g	2910390
gene2971	4731.83	1550.47	7913.2	5.10375	2.35156	0	0	NC_006070.1	140413	141537	+	1125	YALI0_D01243g	GO:0003824;GO:0003959;GO:0010181;GO:0016491;GO:0055114	-	-	YALI0D01243p [Yarrowia lipolytica CLIB122]	YALI0_D01243g	YALI0D01243g	2910450
gene2972	12756.3	5171.05	20341.5	3.93372	1.9759	0	0	NC_006070.1	141921	143087	-	1167	YALI0_D01265g	GO:0003824;GO:0004084;GO:0005739;GO:0008483;GO:0008652;GO:0009081;GO:0009082;GO:0009098;GO:0009099;GO:0016740;GO:0052654;GO:0052655;GO:0052656	K00826	[EC:2.6.1.42]	YALI0D01265p [Yarrowia lipolytica CLIB122]	YALI0_D01265g	YALI0D01265g	2910451
gene2990	2307.36	52.8857	4561.84	86.2584	6.43059	0	0	NC_006070.1	200491	201228	-	738	YALI0_D01716g	-	-	-	YALI0D01716p [Yarrowia lipolytica CLIB122]	YALI0_D01716g	YALI0D01716g	2910471
gene2991	3854.7	331.629	7377.78	22.2471	4.47554	0	0	NC_006070.1	203102	204118	-	1017	YALI0_D01738g	GO:0016491;GO:0055114	-	-	YALI0D01738p [Yarrowia lipolytica CLIB122]	YALI0_D01738g	YALI0D01738g	2910472
gene3054	2175.41	567.697	3783.12	6.66398	2.73638	0	0	NC_006070.1	412681	413340	+	660	YALI0_D03245g	-	-	-	YALI0D03245p [Yarrowia lipolytica CLIB122]	YALI0_D03245g	YALI0D03245g	2910567
gene32	10952.9	2497.05	19408.7	7.77268	2.95841	0	0	NC_006067.1	108301	109344	-	1044	YALI0_A00847g	-	-	-	YALI0A00847p [Yarrowia lipolytica CLIB122]	YALI0_A00847g	YALI0A00847g	2906327
gene3215	51711.9	5961.12	97462.7	16.3497	4.0312	0	0	NC_006070.1	886445	888247	-	1803	YALI0_D06930g	GO:0000287;GO:0003824;GO:0005829;GO:0016831;GO:0030976;GO:0046872	K01568	[EC:4.1.1.1]	YALI0D06930p [Yarrowia lipolytica CLIB122]	YALI0_D06930g	YALI0D06930g	2910787
gene3221	22173.6	7684.42	36662.8	4.77105	2.25431	0	0	NC_006070.1	902205	903239	-	1035	YALI0_D07062g	GO:0003824;GO:0016491;GO:0016616;GO:0050662;GO:0055114	-	-	YALI0D07062p [Yarrowia lipolytica CLIB122]	YALI0_D07062g	YALI0D07062g	2910793
gene3266	22505.6	8477.2	36533.9	4.30967	2.10758	0	0	NC_006070.1	1028756	1030162	-	1407	YALI0_D08052g	GO:0000324;GO:0004180;GO:0004185;GO:0006508;GO:0008233;GO:0016787;GO:0046938;GO:0051603	K13289	[EC:3.4.16.5]	YALI0D08052p [Yarrowia lipolytica CLIB122]	YALI0_D08052g	YALI0D08052g	2910952
gene3274	6077.37	81.9219	12072.8	147.37	7.2033	0	0	NC_006070.1	1056275	1057753	+	1479	YALI0_D08250g	GO:0003935;GO:0009231	-	-	YALI0D08250p [Yarrowia lipolytica CLIB122]	YALI0_D08250g	YALI0D08250g	2910697
gene3278	18859.8	1144.7	36575	31.9517	4.99782	0	0	NC_006070.1	1069078	1070409	+	1332	YALI0_D08338g	GO:0005509;GO:0005544	K17095	-	YALI0D08338p [Yarrowia lipolytica CLIB122]	YALI0_D08338g	YALI0D08338g	2910700
gene3293	2832.17	892.258	4772.07	5.34831	2.41908	0	0	NC_006070.1	1111385	1112704	+	1320	YALI0_D08646g	GO:0003676	-	-	YALI0D08646p [Yarrowia lipolytica CLIB122]	YALI0_D08646g	YALI0D08646g	2910714
gene3295	7975.94	1356.17	14595.7	10.7624	3.42793	0	0	NC_006070.1	1115714	1117105	+	1392	YALI0_D08690g	GO:0003826;GO:0003863;GO:0005947;GO:0009083;GO:0016491;GO:0016624;GO:0055114	K00166	[EC:1.2.4.4]	YALI0D08690p [Yarrowia lipolytica CLIB122]	YALI0_D08690g	YALI0D08690g	2910670
gene3452	8684.74	1196.82	16172.7	13.513	3.75627	0	0	NC_006070.1	1498324	1499523	+	1200	YALI0_D12078g	GO:0003677;GO:0003682;GO:0003713;GO:0004402;GO:0005515;GO:0005634;GO:0006338;GO:0006357;GO:0016573;GO:0035066;GO:0070461;GO:1903508	-	-	YALI0D12078p [Yarrowia lipolytica CLIB122]	YALI0_D12078g	YALI0D12078g	2910611
gene3573	1549.31	317.44	2781.17	8.76125	3.13114	0	0	NC_006070.1	1822765	1824588	-	1824	YALI0_D15026g	GO:0005887;GO:0016020;GO:0016021;GO:0055085	-	-	YALI0D15026p [Yarrowia lipolytica CLIB122]	YALI0_D15026g	YALI0D15026g	2911336
gene3579	10038.3	3492.64	16583.9	4.74824	2.24739	0	0	NC_006070.1	1845033	1847069	-	2037	YALI0_D15158g	-	-	-	YALI0D15158p [Yarrowia lipolytica CLIB122]	YALI0_D15158g	YALI0D15158g	2910748
gene3589	3098.54	298.783	5898.29	19.7411	4.30313	0	0	NC_006070.1	1884100	1885254	+	1155	YALI0_D15400g	GO:0003824;GO:0004076;GO:0009102;GO:0046872;GO:0051536;GO:0051537;GO:0051539	K01012	[EC:2.8.1.6]	YALI0D15400p [Yarrowia lipolytica CLIB122]	YALI0_D15400g	YALI0D15400g	2910759
gene3619	9677.13	1081.21	18273.1	16.9006	4.079	0	0	NC_006070.1	2005787	2006893	-	1107	YALI0_D16247g	GO:0003824;GO:0003959;GO:0010181;GO:0016491;GO:0055114	K00354	[EC:1.6.99.1]	YALI0D16247p [Yarrowia lipolytica CLIB122]	YALI0_D16247g	YALI0D16247g	2911288
gene3707	5326.29	1737.13	8915.46	5.1323	2.35961	0	0	NC_006070.1	2276016	2277866	-	1851	YALI0_D18194g	GO:0006511	-	-	YALI0D18194p [Yarrowia lipolytica CLIB122]	YALI0_D18194g	YALI0D18194g	2911105
gene3712	10688	2004.91	19371.1	9.66184	3.2723	0	0	NC_006070.1	2291415	2292449	-	1035	YALI0_D18337g	GO:0000256;GO:0004037	K01477	[EC:3.5.3.4]	YALI0D18337p [Yarrowia lipolytica CLIB122]	YALI0_D18337g	YALI0D18337g	2911112
gene3905	1962.73	269.943	3655.51	13.5418	3.75935	0	0	NC_006070.1	2966472	2968406	-	1935	YALI0_D22913g	GO:0005887;GO:0016020;GO:0016021;GO:0055085	-	-	YALI0D22913p [Yarrowia lipolytica CLIB122]	YALI0_D22913g	YALI0D22913g	2911246
gene3940	13016.5	4127.91	21905.1	5.30659	2.40779	0	0	NC_006070.1	3086706	3089595	+	2418	YALI0_D23727g	-	-	-	YALI0D23727p [Yarrowia lipolytica CLIB122]	YALI0_D23727g	YALI0D23727g	2910882
gene3945	6077.3	1086.97	11067.6	10.1821	3.34796	0	0	NC_006070.1	3102789	3104189	+	1401	YALI0_D23815g	GO:0005737;GO:0005739;GO:0016407;GO:0016740;GO:0016746;GO:0031405	K09699	[EC:2.3.1.168]	YALI0D23815p [Yarrowia lipolytica CLIB122]	YALI0_D23815g	YALI0D23815g	2910886
gene3957	2875.77	720.201	5031.33	6.98601	2.80447	0	0	NC_006070.1	3162426	3164219	-	1794	YALI0_D24101g	-	-	-	YALI0D24101p [Yarrowia lipolytica CLIB122]	YALI0_D24101g	YALI0D24101g	2911014
gene4007	3008.9	222.412	5795.4	26.057	4.7036	0	0	NC_006070.1	3376338	3377816	-	1479	YALI0_D25322g	GO:0005739;GO:0016020;GO:0016021	-	-	YALI0D25322p [Yarrowia lipolytica CLIB122]	YALI0_D25322g	YALI0D25322g	2910936
gene4196	15976.1	4014.16	27938	6.95987	2.79906	0	0	NC_006071.1	255377	255883	+	507	YALI0_E02310g	GO:0004601;GO:0004602;GO:0006979;GO:0016491;GO:0055114;GO:0098869	K23856	[EC:1.11.1.15]	YALI0E02310p [Yarrowia lipolytica CLIB122]	YALI0_E02310g	YALI0E02310g	2912093
gene4274	2509.86	725.101	4294.63	5.9228	2.56628	0	0	NC_006071.1	450025	451005	-	981	YALI0_E04070g	GO:0016491;GO:0046872;GO:0051213;GO:0055114	-	-	YALI0E04070p [Yarrowia lipolytica CLIB122]	YALI0_E04070g	YALI0E04070g	2912178
gene434	8285.63	491.316	16079.9	32.7283	5.03247	0	0	NC_006067.1	1147178	1147651	+	474	YALI0_A10967g	-	-	-	YALI0A10967p [Yarrowia lipolytica CLIB122]	YALI0_A10967g	YALI0A10967g	2905804
gene4340	30555.9	2502.4	58609.3	23.4212	4.54975	0	0	NC_006071.1	610610	611788	+	1179	YALI0_E05533g	GO:0004468;GO:0016740;GO:0016746;GO:0019473	K18854	[EC:2.3.1.32]	YALI0E05533p [Yarrowia lipolytica CLIB122]	YALI0_E05533g	YALI0E05533g	2911519
gene4353	1239	193.778	2284.22	11.7878	3.55922	0	0	NC_006071.1	661034	666206	+	4176	YALI0_E05819g	GO:0003723;GO:0005634;GO:0010494;GO:0016973	-	-	YALI0E05819p [Yarrowia lipolytica CLIB122]	YALI0_E05819g	YALI0E05819g	2912334
gene4354	3307.24	721.108	5893.37	8.17265	3.0308	0	0	NC_006071.1	668333	669431	+	1029	YALI0_E05841g	GO:0016020;GO:0016021	-	-	YALI0E05841p [Yarrowia lipolytica CLIB122]	YALI0_E05841g	YALI0E05841g	2912336
gene4412	1308.46	64.4423	2552.47	39.6086	5.30774	0	0	NC_006071.1	822368	823969	-	1602	YALI0_E07205g	GO:0006865;GO:0016020;GO:0016021;GO:0022857;GO:0055085	-	-	YALI0E07205p [Yarrowia lipolytica CLIB122]	YALI0_E07205g	YALI0E07205g	2912431
gene4414	67742.2	10333.5	125151	12.1112	3.59827	0	0	NC_006071.1	828503	834223	+	5463	YALI0_E07271g	GO:0000166;GO:0005524;GO:0016874;GO:0046872	K14541	-	YALI0E07271p [Yarrowia lipolytica CLIB122]	YALI0_E07271g	YALI0E07271g	2912433
gene4425	37025.9	3899.3	70152.6	17.9911	4.16921	0	0	NC_006071.1	858959	859891	-	933	YALI0_E07535g	GO:0004053;GO:0005737;GO:0005829;GO:0006525;GO:0016787;GO:0016813;GO:0019547;GO:0030145;GO:0046872	K01476	[EC:3.5.3.1]	YALI0E07535p [Yarrowia lipolytica CLIB122]	YALI0_E07535g	YALI0E07535g	2912445
gene4499	3243.05	756.906	5729.2	7.56924	2.92015	0	0	NC_006071.1	1104303	1105562	-	1260	YALI0_E09262g	GO:0003824	K20247	[EC:4.4.1.36]	YALI0E09262p [Yarrowia lipolytica CLIB122]	YALI0_E09262g	YALI0E09262g	2912527
gene4533	25106.3	1630.17	48582.5	29.8021	4.89734	0	0	NC_006071.1	1236217	1237011	+	795	YALI0_E10043g	GO:0005737;GO:0008597;GO:0019722;GO:0043666;GO:0070884	-	-	YALI0E10043p [Yarrowia lipolytica CLIB122]	YALI0_E10043g	YALI0E10043g	2912582
gene4555	8727.89	1023.55	16432.2	16.0541	4.00487	0	0	NC_006071.1	1303088	1304254	-	1167	YALI0_E10505g	-	-	-	YALI0E10505p [Yarrowia lipolytica CLIB122]	YALI0_E10505g	YALI0E10505g	2912631
gene4589	950.094	43.5243	1856.66	42.6581	5.41475	0	0	NC_006071.1	1382459	1383268	+	810	YALI0_E11319g	-	-	-	YALI0E11319p [Yarrowia lipolytica CLIB122]	YALI0_E11319g	YALI0E11319g	2912747
gene4601	20761.4	4181.98	37340.8	8.92897	3.15849	0	0	NC_006071.1	1409924	1410598	-	675	YALI0_E11517g	-	-	-	YALI0E11517p [Yarrowia lipolytica CLIB122]	YALI0_E11517g	YALI0E11517g	2912782
gene4650	4812.6	902.282	8722.92	9.66762	3.27316	0	0	NC_006071.1	1529941	1531194	-	1254	YALI0_E12573g	GO:0003995;GO:0005739;GO:0008470;GO:0016491;GO:0016627;GO:0050660;GO:0055114	K00253	[EC:1.3.8.4]	YALI0E12573p [Yarrowia lipolytica CLIB122]	YALI0_E12573g	YALI0E12573g	2912840
gene4651	4655.74	729.906	8581.57	11.7571	3.55546	0	0	NC_006071.1	1531621	1533324	+	1704	YALI0_E12595g	GO:0004485;GO:0005739;GO:0006552;GO:0016874;GO:1905202	-	-	YALI0E12595p [Yarrowia lipolytica CLIB122]	YALI0_E12595g	YALI0E12595g	2912841
gene4891	69370.8	6284.12	132458	21.0781	4.39768	0	0	NC_006071.1	2178334	2179830	-	1497	YALI0_E18238g	GO:0003824;GO:0003867;GO:0005739;GO:0008483;GO:0009448;GO:0009450;GO:0030170	K13524	-	YALI0E18238p [Yarrowia lipolytica CLIB122]	YALI0_E18238g	YALI0E18238g	2911709
gene4902	2954.23	885.834	5022.64	5.66995	2.50334	0	0	NC_006071.1	2203246	2204193	-	948	YALI0_E18502g	GO:0010181;GO:0048037	-	-	YALI0E18502p [Yarrowia lipolytica CLIB122]	YALI0_E18502g	YALI0E18502g	2911720
gene4997	8055.49	2109.05	14001.9	6.63898	2.73096	0	0	NC_006071.1	2442474	2443163	-	690	YALI0_E20625g	GO:0009116	K00761	[EC:2.4.2.9]	YALI0E20625p [Yarrowia lipolytica CLIB122]	YALI0_E20625g	YALI0E20625g	2911826
gene4998	11800.8	1168.06	22433.5	19.2058	4.26347	0	0	NC_006071.1	2443947	2445170	+	1224	YALI0_E20647g	-	-	-	YALI0E20647p [Yarrowia lipolytica CLIB122]	YALI0_E20647g	YALI0E20647g	2911825
gene5093	2028.29	505.524	3551.06	7.02451	2.8124	0	0	NC_006071.1	2690502	2691704	-	1203	YALI0_E22803g	GO:0016020;GO:0016021	K15289	-	YALI0E22803p [Yarrowia lipolytica CLIB122]	YALI0_E22803g	YALI0E22803g	2912912
gene5198	2437.35	639.059	4235.64	6.62794	2.72856	0	0	NC_006071.1	2992924	2993349	+	426	YALI0_E25003g	-	-	-	YALI0E25003p [Yarrowia lipolytica CLIB122]	YALI0_E25003g	YALI0E25003g	2912673
gene5207	3979.91	584.039	7375.77	12.6289	3.65866	0	0	NC_006071.1	3016632	3020699	-	4068	YALI0_E25201g	GO:0000166;GO:0005524;GO:0005886;GO:0008559;GO:0016020;GO:0016021;GO:0016887;GO:0042626;GO:0042908;GO:0055085	-	-	YALI0E25201p [Yarrowia lipolytica CLIB122]	YALI0_E25201g	YALI0E25201g	2912710
gene5227	8930.21	1750.53	16109.9	9.20289	3.20209	0	0	NC_006071.1	3051691	3053046	-	1356	YALI0_E25740g	GO:0006147;GO:0008270;GO:0008892;GO:0016787;GO:0016810;GO:0046098;GO:0046872	K01487	[EC:3.5.4.3]	YALI0E25740p [Yarrowia lipolytica CLIB122]	YALI0_E25740g	YALI0E25740g	2912608
gene5243	5492.39	1829.58	9155.2	5.00399	2.32308	0	0	NC_006071.1	3099216	3101036	+	1821	YALI0_E26081g	GO:0004843;GO:0030433;GO:0036266;GO:0071630;GO:0072671	-	-	YALI0E26081p [Yarrowia lipolytica CLIB122]	YALI0_E26081g	YALI0E26081g	2912624
gene5263	1262.85	19.3039	2506.39	129.839	7.02058	0	0	NC_006071.1	3147924	3148490	+	567	YALI0_E26499g	-	-	-	YALI0E26499p [Yarrowia lipolytica CLIB122]	YALI0_E26499g	YALI0E26499g	2912379
gene5514	6115.78	352.263	11879.3	33.7229	5.07565	0	0	NC_006071.1	3790464	3792200	-	1737	YALI0_E31889g	GO:0016020;GO:0016021	-	-	YALI0E31889p [Yarrowia lipolytica CLIB122]	YALI0_E31889g	YALI0E31889g	2911881
gene5625	1933.65	29.2541	3838.04	131.197	7.03559	0	0	NC_006071.1	4066136	4067017	-	882	YALI0_E34221g	GO:0008080	-	-	YALI0E34221p [Yarrowia lipolytica CLIB122]	YALI0_E34221g	YALI0E34221g	2912904
gene5649	1104.48	95.5543	2113.41	22.1174	4.46711	0	0	NC_006071.1	4143827	4145446	+	1620	YALI0_E34771g	-	K01426	[EC:3.5.1.4]	YALI0E34771p [Yarrowia lipolytica CLIB122]	YALI0_E34771g	YALI0E34771g	2912052
gene5655	4126.78	1299.41	6954.16	5.35177	2.42002	0	0	NC_006071.1	4157013	4158272	-	1260	YALI0_E34881g	GO:0004623;GO:0005743;GO:0035965;GO:0052689;GO:0055088	K13535	[EC:3.1.1.-]	YALI0E34881p [Yarrowia lipolytica CLIB122]	YALI0_E34881g	YALI0E34881g	2912143
gene5704	866.238	63.6539	1668.82	26.2171	4.71244	0	0	NC_006072.1	148667	149608	+	942	YALI0_F00946g	GO:0016020;GO:0016021	-	-	YALI0F00946p [Yarrowia lipolytica CLIB122]	YALI0_F00946g	YALI0F00946g	2908205
gene5778	2083.87	290.603	3877.14	13.3417	3.73787	0	0	NC_006072.1	387315	388319	-	1005	YALI0_F02607g	GO:0006574;GO:0008442;GO:0016491;GO:0050661;GO:0051287;GO:0055114	K00020	[EC:1.1.1.31]	YALI0F02607p [Yarrowia lipolytica CLIB122]	YALI0_F02607g	YALI0F02607g	2907781
gene5789	17620	6242.32	28997.7	4.64533	2.21578	0	0	NC_006072.1	408290	409510	+	1221	YALI0_F02849g	GO:0004047;GO:0005515;GO:0005739;GO:0006546;GO:0008483;GO:0016740;GO:0019464;GO:0032259	K00605	[EC:2.1.2.10]	YALI0F02849p [Yarrowia lipolytica CLIB122]	YALI0_F02849g	YALI0F02849g	2907779
gene5862	30083	6776.88	53389.1	7.87812	2.97785	0	0	NC_006072.1	685789	687336	+	1548	YALI0_F04444g	GO:0016491;GO:0016620;GO:0055114	K00129	[EC:1.2.1.5]	YALI0F04444p [Yarrowia lipolytica CLIB122]	YALI0_F04444g	YALI0F04444g	2908884
gene5886	5467.4	1852.37	9082.43	4.90314	2.29371	0	0	NC_006072.1	761808	763004	-	1197	YALI0_F05038g	GO:0003824;GO:0003826;GO:0005739;GO:0005947;GO:0007584;GO:0009083;GO:0055114	K00167	[EC:1.2.4.4]	YALI0F05038p [Yarrowia lipolytica CLIB122]	YALI0_F05038g	YALI0F05038g	2908627
gene5929	6808.87	437.447	13180.3	30.13	4.91313	0	0	NC_006072.1	878373	879902	+	1530	YALI0_F05940g	GO:0004197;GO:0005737;GO:0006508;GO:0008234;GO:0009636;GO:0043418	K01372	[EC:3.4.22.40]	YALI0F05940p [Yarrowia lipolytica CLIB122]	YALI0_F05940g	YALI0F05940g	2908459
gene5950	2057.49	423.896	3691.08	8.70751	3.12226	0	0	NC_006072.1	941548	943197	-	1650	YALI0_F06358g	GO:0000139;GO:0004620;GO:0004806;GO:0005768;GO:0005783;GO:0005789;GO:0005794;GO:0006629;GO:0006914;GO:0016020;GO:0016021;GO:0016042;GO:0016236;GO:0016787;GO:0031902;GO:0032585;GO:0034496;GO:0034727;GO:0046461	K17900	[EC:3.1.1.3]	YALI0F06358p [Yarrowia lipolytica CLIB122]	YALI0_F06358g	YALI0F06358g	2908407
gene6010	9958.08	2698.67	17217.5	6.37999	2.67356	0	0	NC_006072.1	1099063	1101096	+	2034	YALI0_F07667g	GO:0004222;GO:0005758;GO:0006508;GO:0006518;GO:0008233;GO:0008237;GO:0016787;GO:0046872	K01405	[EC:3.4.24.37]	YALI0F07667p [Yarrowia lipolytica CLIB122]	YALI0_F07667g	YALI0F07667g	2908392
gene6040	20108.7	4922.75	35294.7	7.16972	2.84192	0	0	NC_006072.1	1168356	1169817	-	420	YALI0_F08327g	-	-	-	YALI0F08327p [Yarrowia lipolytica CLIB122]	YALI0_F08327g	YALI0F08327g	2908514
gene6079	16480	2181.58	30778.5	14.1084	3.81848	0	0	NC_006072.1	1289302	1290237	+	936	YALI0_F09251g	GO:0004846;GO:0005777;GO:0006144;GO:0016491;GO:0019628;GO:0055114	K00365	[EC:1.7.3.3]	YALI0F09251p [Yarrowia lipolytica CLIB122]	YALI0_F09251g	YALI0F09251g	2908329
gene6099	4905.69	27.1158	9784.27	360.833	8.49519	0	0	NC_006072.1	1326607	1329246	+	2640	YALI0_F09691g	GO:0005887;GO:0016020;GO:0016021;GO:0035672;GO:0035673;GO:0055085	-	-	YALI0F09691p [Yarrowia lipolytica CLIB122]	YALI0_F09691g	YALI0F09691g	2908974
gene6121	12302	4926.05	19677.9	3.99467	1.99808	0	0	NC_006072.1	1386334	1387961	-	1011	YALI0_F10197g	GO:0003884;GO:0016491;GO:0046416;GO:0055114;GO:0071949	-	-	YALI0F10197p [Yarrowia lipolytica CLIB122]	YALI0_F10197g	YALI0F10197g	2909003
gene6240	8519.04	305.065	16733	54.8506	5.77744	0	0	NC_006072.1	1747490	1748551	-	1062	YALI0_F13013g	GO:0005886;GO:0016020	-	-	YALI0F13013p [Yarrowia lipolytica CLIB122]	YALI0_F13013g	YALI0F13013g	2909009
gene6269	1173.93	49.8542	2298	46.0944	5.52652	0	0	NC_006072.1	1820246	1822048	+	1803	YALI0_F13607g	GO:0005887;GO:0016020;GO:0016021;GO:0022857;GO:0031224;GO:0055085	-	-	YALI0F13607p [Yarrowia lipolytica CLIB122]	YALI0_F13607g	YALI0F13607g	2908315
gene6399	1565.66	103.912	3027.41	29.1345	4.86465	0	0	NC_006072.1	2212878	2214473	+	1596	YALI0_F16511g	GO:0000083;GO:0000790;GO:0003677;GO:0030907;GO:0033309;GO:0071931	-	-	YALI0F16511p [Yarrowia lipolytica CLIB122]	YALI0_F16511g	YALI0F16511g	2908904
gene6465	24005	8313.28	39696.7	4.77509	2.25553	0	0	NC_006072.1	2390836	2392221	-	1386	YALI0_F17974g	GO:0004197;GO:0005737;GO:0006508;GO:0008234;GO:0009636;GO:0043418	K01372	[EC:3.4.22.40]	YALI0F17974p [Yarrowia lipolytica CLIB122]	YALI0_F17974g	YALI0F17974g	2908365
gene6505	2552.77	706.136	4399.41	6.23026	2.63929	0	0	NC_006072.1	2507846	2509480	-	1446	YALI0_F18788g	GO:0000977;GO:0003677;GO:0005634;GO:0007275;GO:0008134;GO:0043565;GO:0044212;GO:0045944;GO:0046983	K09265	-	YALI0F18788p [Yarrowia lipolytica CLIB122]	YALI0_F18788g	YALI0F18788g	2907863
gene6511	4077.53	7.46448	8147.6	1091.52	10.0921	0	0	NC_006072.1	2525451	2526935	-	1485	YALI0_F18920g	-	-	-	YALI0F18920p [Yarrowia lipolytica CLIB122]	YALI0_F18920g	YALI0F18920g	2908002
gene6603	14339.4	5701.11	22977.7	4.0304	2.01092	0	0	NC_006072.1	2790817	2793090	-	2274	YALI0_F20988g	GO:0004222;GO:0005758;GO:0006508;GO:0006518;GO:0008233;GO:0008237;GO:0016787;GO:0046872	K01405	[EC:3.4.24.37]	YALI0F20988p [Yarrowia lipolytica CLIB122]	YALI0_F20988g	YALI0F20988g	2908940
gene6653	2178.1	341.352	4014.85	11.7616	3.55601	0	0	NC_006072.1	2931379	2932257	+	879	YALI0_F22121g	GO:0003824;GO:0004300;GO:0005739;GO:0006635	K05607	[EC:4.2.1.18]	YALI0F22121p [Yarrowia lipolytica CLIB122]	YALI0_F22121g	YALI0F22121g	2908832
gene6685	3760.71	1167.34	6354.09	5.44323	2.44446	0	0	NC_006072.1	3006798	3007379	-	582	YALI0_F22847g	-	-	-	YALI0F22847p [Yarrowia lipolytica CLIB122]	YALI0_F22847g	YALI0F22847g	2908795
gene6722	12688.6	1006.21	24371.1	24.2206	4.59816	0	0	NC_006072.1	3115629	3116882	-	1254	YALI0_F23749g	GO:0005739;GO:0016491;GO:0016627;GO:0050660;GO:0055114	K00252	[EC:1.3.8.6]	YALI0F23749p [Yarrowia lipolytica CLIB122]	YALI0_F23749g	YALI0F23749g	2908755
gene6782	39241.9	4608.44	73875.4	16.0304	4.00274	0	0	NC_006072.1	3244230	3244940	-	711	YALI0_F25113g	GO:0048037	K07734	-	YALI0F25113p [Yarrowia lipolytica CLIB122]	YALI0_F25113g	YALI0F25113g	2908440
gene6803	861.199	30.4607	1691.94	55.5449	5.79558	0	0	NC_006072.1	3291858	3293534	+	1677	YALI0_F25597g	GO:0005887;GO:0006855;GO:0016020;GO:0016021;GO:0055085	K08158	-	YALI0F25597p [Yarrowia lipolytica CLIB122]	YALI0_F25597g	YALI0F25597g	2908359
gene6831	10569.1	1665.62	19472.6	11.6909	3.54732	0	0	NC_006072.1	3368968	3370515	+	1548	YALI0_F26191g	GO:0004777;GO:0009013;GO:0009450;GO:0016491;GO:0016620;GO:0055114	K00135	-	YALI0F26191p [Yarrowia lipolytica CLIB122]	YALI0_F26191g	YALI0F26191g	2908948
gene6848	3228.05	1081.1	5375.01	4.97181	2.31377	0	0	NC_006072.1	3402258	3403796	-	1539	YALI0_F26587g	GO:0005739;GO:0008260;GO:0008410;GO:0016740;GO:0046952	K01027	[EC:2.8.3.5]	YALI0F26587p [Yarrowia lipolytica CLIB122]	YALI0_F26587g	YALI0F26587g	2908340
gene6876	2598.87	496.476	4701.27	9.46928	3.24325	0	0	NC_006072.1	3454593	3456464	-	1872	YALI0_F27203g	-	-	-	YALI0F27203p [Yarrowia lipolytica CLIB122]	YALI0_F27203g	YALI0F27203g	2908010
gene6900	2636.35	360.589	4912.1	13.6224	3.76791	0	0	NC_006072.1	3527180	3528223	-	1044	YALI0_F27731g	-	-	-	YALI0F27731p [Yarrowia lipolytica CLIB122]	YALI0_F27731g	YALI0F27731g	2907900
gene691	49846.2	17774.9	81917.5	4.60861	2.20433	0	0	NC_006067.1	1841205	1841810	+	606	YALI0_A17831g	GO:0019867	-	-	YALI0A17831p [Yarrowia lipolytica CLIB122]	YALI0_A17831g	YALI0A17831g	2905726
gene7001	2349.37	731.603	3967.13	5.42252	2.43896	0	0	NC_006072.1	3783542	3787603	+	4062	YALI0_F30261g	GO:0005524;GO:0005737	K15710	-	YALI0F30261p [Yarrowia lipolytica CLIB122]	YALI0_F30261g	YALI0F30261g	2908958
gene7016	13424.4	37.4381	26811.3	716.151	9.48412	0	0	NC_006072.1	3821322	3822752	-	1431	YALI0_F30569g	GO:0005215;GO:0005886;GO:0015205;GO:0015856;GO:0016020;GO:0016021;GO:0022857;GO:0055085	-	-	YALI0F30569p [Yarrowia lipolytica CLIB122]	YALI0_F30569g	YALI0F30569g	2907646
gene7017	791.641	8.69487	1574.59	181.094	7.50059	0	0	NC_006072.1	3824353	3825483	-	1131	YALI0_F30591g	GO:0003884;GO:0016491;GO:0046416;GO:0055114;GO:0071949	-	-	YALI0F30591p [Yarrowia lipolytica CLIB122]	YALI0_F30591g	YALI0F30591g	2907652
gene762	4144	1103.36	7184.63	6.51159	2.70301	0	0	NC_006067.1	2088186	2089586	-	1401	YALI0_A19448g	GO:0004029;GO:0016491;GO:0016620;GO:0055114	-	-	YALI0A19448p [Yarrowia lipolytica CLIB122]	YALI0_A19448g	YALI0A19448g	2906069
gene842	33112.3	1053.83	65170.7	61.842	5.95051	0	0	NC_006067.1	2288713	2289906	-	1194	YALI0_A21373g	-	-	-	YALI0A21373p [Yarrowia lipolytica CLIB122]	YALI0_A21373g	YALI0A21373g	2906408
gene844	9821.44	2237.93	17405	7.77726	2.95926	0	0	NC_006067.1	2294548	2295618	+	1071	YALI0_A21417g	GO:0003824;GO:0005829;GO:0006520;GO:0006545;GO:0006567;GO:0008732;GO:0016829	K01620	[EC:4.1.2.48]	YALI0A21417p [Yarrowia lipolytica CLIB122]	YALI0_A21417g	YALI0A21417g	2906427
gene1792	3428.41	413.288	6443.53	15.5909	3.96263	0	0	NC_006068.1	2862781	2864478	-	1698	YALI0_B21824g	GO:0004497;GO:0005506;GO:0016020;GO:0016021;GO:0016491;GO:0016705;GO:0020037;GO:0046872;GO:0055114	-	-	YALI0B21824p [Yarrowia lipolytica CLIB122]	YALI0_B21824g	YALI0B21824g	2907183
gene2071	2568.41	831.496	4305.33	5.17781	2.37234	0	0	NC_006069.1	628618	630402	-	1785	YALI0_C04796g	GO:0005215;GO:0005887;GO:0016020;GO:0016021;GO:0022857;GO:0055085	-	-	YALI0C04796p [Yarrowia lipolytica CLIB122]	YALI0_C04796g	YALI0C04796g	2909542
gene5968	1355.31	320.899	2389.72	7.44695	2.89665	0	0	NC_006072.1	985572	986186	+	615	YALI0_F06710g	GO:0000256;GO:0004848;GO:0050385	K01483	[EC:4.3.2.3]	YALI0F06710p [Yarrowia lipolytica CLIB122]	YALI0_F06710g	YALI0F06710g	2908518
gene1247	1135.71	75.4921	2195.93	29.0882	4.86236	0	0	NC_006068.1	1329593	1331851	+	2259	YALI0_B09713g	GO:0000981;GO:0003677;GO:0005634;GO:0006351;GO:0006355;GO:0008270;GO:0043565;GO:0045944;GO:0046872	-	-	YALI0B09713p [Yarrowia lipolytica CLIB122]	YALI0_B09713g	YALI0B09713g	2907471
gene5323	1261.98	6.81314	2517.15	369.456	8.52926	0	0	NC_006071.1	3292679	3294400	+	1722	YALI0_E27852g	GO:0005215;GO:0005887;GO:0016020;GO:0016021;GO:0022857;GO:0042906;GO:0042907;GO:0055085	K03458	-	YALI0E27852p [Yarrowia lipolytica CLIB122]	YALI0_E27852g	YALI0E27852g	2912222
gene5018	6282.84	2549.91	10015.8	3.92789	1.97376	3e-305	9e-304	NC_006071.1	2508412	2509257	+	846	YALI0_E21087g	GO:0000079;GO:0019901	K21197	-	YALI0E21087p [Yarrowia lipolytica CLIB122]	YALI0_E21087g	YALI0E21087g	2911852
gene6198	4412.12	1694.77	7129.47	4.20675	2.07271	1e-303	2e-302	NC_006072.1	1581174	1582499	-	1326	YALI0_F11979g	GO:0046983	-	-	YALI0F11979p [Yarrowia lipolytica CLIB122]	YALI0_F11979g	YALI0F11979g	2908187
gene2092	2800.01	740.424	4859.6	6.56327	2.71441	5e-297	1e-295	NC_006069.1	676238	677590	-	1353	YALI0_C05324g	GO:0003676;GO:0003723;GO:0005634	-	-	YALI0C05324p [Yarrowia lipolytica CLIB122]	YALI0_C05324g	YALI0C05324g	2909374
gene1865	1855.43	559.78	3151.09	5.62915	2.49292	2e-295	6.76999e-294	NC_006068.1	3047634	3048953	-	1320	YALI0_B23430g	GO:0000122;GO:0000790;GO:0003682;GO:0005634;GO:0008134;GO:0016491;GO:0034648;GO:0034720;GO:0045944;GO:0050660;GO:0055114	K13367	[EC:1.5.3.17]	YALI0B23430p [Yarrowia lipolytica CLIB122]	YALI0_B23430g	YALI0B23430g	2906855
gene1464	4987.03	731.791	9242.26	12.6296	3.65874	4.7807e-290	1.27294e-288	NC_006068.1	1944241	1946418	+	2178	YALI0_B14619g	GO:0000166;GO:0005524;GO:0016874;GO:0046872	K01968	[EC:6.4.1.4]	YALI0B14619p [Yarrowia lipolytica CLIB122]	YALI0_B14619g	YALI0B14619g	2907262
gene6807	1334.58	345.036	2324.13	6.7359	2.75187	2.85199e-289	7.5625e-288	NC_006072.1	3301701	3302840	+	1140	YALI0_F25685g	GO:0016020;GO:0016021;GO:0055085	-	-	YALI0F25685p [Yarrowia lipolytica CLIB122]	YALI0_F25685g	YALI0F25685g	2908234
gene3804	1118.65	66.382	2170.91	32.7033	5.03136	1.4783e-284	3.85621e-283	NC_006070.1	2598215	2598931	-	717	YALI0_D20482g	GO:0000978;GO:0000981;GO:0003700;GO:0005634;GO:0006355;GO:0006357;GO:0008270;GO:0043565;GO:0046872	-	-	YALI0D20482p [Yarrowia lipolytica CLIB122]	YALI0_D20482g	YALI0D20482g	2910161
gene4030	3158.96	647.448	5670.48	8.7582	3.13063	4.22736e-284	1.09826e-282	NC_006070.1	3440546	3441424	-	879	YALI0_D25872g	GO:0000149;GO:0005484;GO:0005886;GO:0006886;GO:0006887;GO:0006906;GO:0012505;GO:0016020;GO:0016021;GO:0016192;GO:0031201;GO:0048278	K08486	-	YALI0D25872p [Yarrowia lipolytica CLIB122]	YALI0_D25872g	YALI0D25872g	2910129
gene858	1688.4	5.40228	3371.4	624.069	9.28556	2.53975e-283	6.51904e-282	NC_006068.1	27715	28884	-	1170	YALI0_B00374g	GO:0004190;GO:0005576;GO:0006508;GO:0008233;GO:0009277;GO:0016787;GO:0030163;GO:0031505	-	-	YALI0B00374p [Yarrowia lipolytica CLIB122]	YALI0_B00374g	YALI0B00374g	2907315
gene389	28042.2	6032.77	50051.7	8.29663	3.05253	1.08918e-282	2.78456e-281	NC_006067.1	993092	996076	+	2985	YALI0_A09856g	GO:0003824;GO:0004375;GO:0005739;GO:0005960;GO:0006544;GO:0006546;GO:0016491;GO:0016594;GO:0019464;GO:0030170;GO:0055114	K00281	[EC:1.4.4.2]	YALI0A09856p [Yarrowia lipolytica CLIB122]	YALI0_A09856g	YALI0A09856g	2905991
gene2137	15546.1	7141.95	23950.3	3.35347	1.74565	1.63967e-281	4.17531e-280	NC_006069.1	821571	822359	-	789	YALI0_C06325g	-	-	-	YALI0C06325p [Yarrowia lipolytica CLIB122]	YALI0_C06325g	YALI0C06325g	2909307
gene1540	3770.04	1472.63	6067.45	4.12015	2.0427	2.06589e-281	5.23986e-280	NC_006068.1	2146918	2147683	-	645	YALI0_B16280g	GO:0000786;GO:0003677;GO:0003690;GO:0005634;GO:0005694;GO:0006334;GO:0006355;GO:0016584;GO:0030261;GO:0031492;GO:0031936;GO:0045910	K11275	-	YALI0B16280p [Yarrowia lipolytica CLIB122]	YALI0_B16280g	YALI0B16280g	2907544
gene633	1824.36	92.8062	3555.92	38.3156	5.25986	6.49051e-281	1.63975e-279	NC_006067.1	1675359	1676408	+	1050	YALI0_A16379g	GO:0004022;GO:0005737;GO:0008270;GO:0016491;GO:0046872;GO:0055114	K13953	[EC:1.1.1.1]	YALI0A16379p [Yarrowia lipolytica CLIB122]	YALI0_A16379g	YALI0A16379g	2906568
gene3662	1811.8	569.584	3054.02	5.36184	2.42273	2.63179e-278	6.57128e-277	NC_006070.1	2118086	2118721	-	636	YALI0_D17182g	GO:0005829;GO:0009691;GO:0016799	-	-	YALI0D17182p [Yarrowia lipolytica CLIB122]	YALI0_D17182g	YALI0D17182g	2911226
gene3907	721.518	113.475	1329.56	11.7168	3.55051	3.5154e-278	8.74353e-277	NC_006070.1	2977496	2978863	-	1368	YALI0_D22957g	GO:0000324;GO:0004190;GO:0006508;GO:0008233;GO:0016787;GO:0030163;GO:0051603	-	-	YALI0D22957p [Yarrowia lipolytica CLIB122]	YALI0_D22957g	YALI0D22957g	2911248
gene4346	2492.63	884.02	4101.23	4.6393	2.21391	5.87323e-277	1.45515e-275	NC_006071.1	632880	634037	+	1158	YALI0_E05665g	GO:0015267;GO:0016020;GO:0016021;GO:0055085	K03441	-	YALI0E05665p [Yarrowia lipolytica CLIB122]	YALI0_E05665g	YALI0E05665g	2912325
gene5812	11384.8	4532.37	18237.3	4.02379	2.00855	1.28561e-276	3.17298e-275	NC_006072.1	476345	477949	+	1605	YALI0_F03388g	GO:0003700;GO:0006355	K09043	-	YALI0F03388p [Yarrowia lipolytica CLIB122]	YALI0_F03388g	YALI0F03388g	2907736
gene3493	4606	1193.05	8018.94	6.72138	2.74876	9.04115e-276	2.22288e-274	NC_006070.1	1614808	1616184	+	1377	YALI0_D13024g	GO:0003824;GO:0004356;GO:0006542;GO:0006598;GO:0006807;GO:0008134	K01915	[EC:6.3.1.2]	YALI0D13024p [Yarrowia lipolytica CLIB122]	YALI0_D13024g	YALI0D13024g	2911272
gene4809	25834.3	12151.8	39516.8	3.25193	1.7013	1.57344e-274	3.85373e-273	NC_006071.1	1942061	1943822	-	1416	YALI0_E16346g	GO:0003824;GO:0004372;GO:0006544;GO:0006565;GO:0006730;GO:0008270;GO:0016597;GO:0016740;GO:0019264;GO:0030170;GO:0035999;GO:0046653;GO:0046655;GO:0050897;GO:0070905;GO:1904482	K00600	[EC:2.1.2.1]	YALI0E16346p [Yarrowia lipolytica CLIB122]	YALI0_E16346g	YALI0E16346g	2911591
gene1472	25949.6	12405	39494.3	3.18375	1.67073	2.11326e-271	5.11728e-270	NC_006068.1	1964918	1965415	-	498	YALI0_B14795g	-	-	-	YALI0B14795p [Yarrowia lipolytica CLIB122]	YALI0_B14795g	YALI0B14795g	2907121
gene793	4237.75	974.735	7500.76	7.69518	2.94396	6.41508e-271	1.54758e-269	NC_006067.1	2173531	2175933	+	2403	YALI0_A20174g	-	-	-	YALI0A20174p [Yarrowia lipolytica CLIB122]	YALI0_A20174g	YALI0A20174g	2906020
gene3326	3326.74	1301.27	5352.21	4.11308	2.04022	5.66855e-269	1.36236e-267	NC_006070.1	1193593	1194678	+	1086	YALI0_D09339g	-	-	-	YALI0D09339p [Yarrowia lipolytica CLIB122]	YALI0_D09339g	YALI0D09339g	2910841
gene3747	4136.36	211.976	8060.75	38.0266	5.24894	1.09826e-267	2.61991e-266	NC_006070.1	2419780	2421375	+	1596	YALI0_D19140g	GO:0003824;GO:0004474;GO:0005737;GO:0005782;GO:0006097;GO:0006099;GO:0016740	K01638	[EC:2.3.3.9]	YALI0D19140p [Yarrowia lipolytica CLIB122]	YALI0_D19140g	YALI0D19140g	2911154
gene1353	10947.7	5051.2	16844.2	3.3347	1.73756	3.01192e-267	7.15833e-266	NC_006068.1	1614429	1615406	-	978	YALI0_B12078g	GO:0004487;GO:0004488;GO:0005829;GO:0009113;GO:0055114	K00295	[EC:1.5.1.15]	YALI0B12078p [Yarrowia lipolytica CLIB122]	YALI0_B12078g	YALI0B12078g	2907081
gene2351	3167.33	97.3454	6237.32	64.0741	6.00167	4.63563e-267	1.09767e-265	NC_006069.1	1546049	1546390	-	342	YALI0_C11209g	-	-	-	YALI0C11209p [Yarrowia lipolytica CLIB122]	YALI0_C11209g	YALI0C11209g	2909146
gene1566	344.211	8.0336	680.389	84.6929	6.40417	5.97728e-265	1.39986e-263	NC_006068.1	2215978	2216916	+	939	YALI0_B16852g	GO:0016020;GO:0016021	-	-	YALI0B16852p [Yarrowia lipolytica CLIB122]	YALI0_B16852g	YALI0B16852g	2907136
gene4615	9967.57	4600.71	15334.4	3.33305	1.73684	2.38169e-263	5.51744e-262	NC_006071.1	1437511	1439133	+	1623	YALI0_E11847g	-	K01426	[EC:3.5.1.4]	YALI0E11847p [Yarrowia lipolytica CLIB122]	YALI0_E11847g	YALI0E11847g	2912800
gene5494	1600.99	499.441	2702.54	5.41112	2.43593	8.37857e-263	1.92707e-261	NC_006071.1	3721637	3721942	+	306	YALI0_E31537g	-	K20316	-	YALI0E31537p [Yarrowia lipolytica CLIB122]	YALI0_E31537g	YALI0E31537g	2911986
gene6153	3027.04	1183.79	4870.29	4.11416	2.0406	9.2881e-260	2.12106e-258	NC_006072.1	1463499	1464779	-	1281	YALI0_F11011g	GO:0003676	-	-	YALI0F11011p [Yarrowia lipolytica CLIB122]	YALI0_F11011g	YALI0F11011g	2907805
gene3189	1003.51	245.132	1761.88	7.18746	2.84548	6.27951e-255	1.41388e-253	NC_006070.1	817886	818437	-	552	YALI0_D06391g	GO:0008080	-	-	YALI0D06391p [Yarrowia lipolytica CLIB122]	YALI0_D06391g	YALI0D06391g	2910872
gene3397	4441.35	1235.16	7647.54	6.19153	2.6303	2.94739e-254	6.61308e-253	NC_006070.1	1357090	1359450	+	2361	YALI0_D10857g	GO:0005515;GO:0008270	-	-	YALI0D10857p [Yarrowia lipolytica CLIB122]	YALI0_D10857g	YALI0D10857g	2910443
gene3352	30989.5	7658.97	54320.1	7.09235	2.82626	1.71052e-253	3.81124e-252	NC_006070.1	1255379	1256428	-	1050	YALI0_D09933g	GO:0005739;GO:0009916;GO:0010230;GO:0016020;GO:0016021;GO:0016491;GO:0046872;GO:0055114;GO:0070469	-	-	YALI0D09933p [Yarrowia lipolytica CLIB122]	YALI0_D09933g	YALI0D09933g	2910928
gene6815	21166.1	7406.32	34925.8	4.71568	2.23746	1.28355e-251	2.85001e-250	NC_006072.1	3329594	3330979	-	1386	YALI0_F25861g	GO:0003676	K03034	-	YALI0F25861p [Yarrowia lipolytica CLIB122]	YALI0_F25861g	YALI0F25861g	2907690
gene3893	11220.6	5340.75	17100.4	3.20188	1.67892	1.58091e-251	3.49818e-250	NC_006070.1	2908080	2909621	-	1542	YALI0_D22638g	GO:0016020;GO:0016021;GO:0055085	-	-	YALI0D22638p [Yarrowia lipolytica CLIB122]	YALI0_D22638g	YALI0D22638g	2910190
gene2811	570.146	77.7949	1062.5	13.6577	3.77164	1.89012e-251	4.168e-250	NC_006069.1	2954244	2955018	-	618	YALI0_C22121g	GO:0047617	-	-	YALI0C22121p [Yarrowia lipolytica CLIB122]	YALI0_C22121g	YALI0C22121g	2909822
gene1635	4478.25	1931.28	7025.23	3.63761	1.86299	2.24685e-251	4.93769e-250	NC_006068.1	2403621	2404889	-	1269	YALI0_B18348g	GO:0000032;GO:0004476;GO:0005829;GO:0005975;GO:0006486;GO:0008270;GO:0009298;GO:0016853;GO:0031505;GO:0046872	K01809	[EC:5.3.1.8]	YALI0B18348p [Yarrowia lipolytica CLIB122]	YALI0_B18348g	YALI0B18348g	2907547
gene6995	11057.9	5266.05	16849.8	3.19971	1.67794	1.00012e-250	2.19036e-249	NC_006072.1	3772106	3773002	+	897	YALI0_F30129g	GO:0003824;GO:0004731;GO:0005737;GO:0006139;GO:0009116;GO:0016740;GO:0016757;GO:0016763	K03783	[EC:2.4.2.1]	YALI0F30129p [Yarrowia lipolytica CLIB122]	YALI0_F30129g	YALI0F30129g	2908714
gene5686	1217.21	343.322	2091.09	6.09075	2.60662	1.32178e-250	2.88499e-249	NC_006072.1	86203	86709	-	507	YALI0_F00528g	-	-	-	YALI0F00528p [Yarrowia lipolytica CLIB122]	YALI0_F00528g	YALI0F00528g	2908249
gene5863	1579.14	184.133	2974.15	16.1522	4.01366	2.17724e-250	4.72004e-249	NC_006072.1	688857	689552	-	696	YALI0_F04466g	GO:0005737;GO:0006044	-	-	YALI0F04466p [Yarrowia lipolytica CLIB122]	YALI0_F04466g	YALI0F04466g	2908885
gene7000	895.993	207.659	1584.33	7.62945	2.93158	4.96706e-247	1.06958e-245	NC_006072.1	3781958	3782419	+	462	YALI0_F30239g	GO:0016020;GO:0016021	-	-	YALI0F30239p [Yarrowia lipolytica CLIB122]	YALI0_F30239g	YALI0F30239g	2908957
gene0	478.09	7.99994	948.181	118.524	6.88903	1.31153e-245	2.81475e-244	NC_006067.1	2659	5277	+	2619	YALI0_A00110g	GO:0005887;GO:0016020;GO:0016021;GO:0035672;GO:0035673;GO:0055085	-	-		YALI0_A00110g	YALI0A00110g	2906259
gene4446	8061.71	1450.24	14673.2	10.1178	3.33882	3.60474e-245	7.68493e-244	NC_006071.1	947212	947487	-	276	YALI0_E08085g	-	-	-	YALI0E08085p [Yarrowia lipolytica CLIB122]	YALI0_E08085g	YALI0E08085g	7009541
gene1180	1932.33	688.98	3175.68	4.60925	2.20453	1.34421e-244	2.85621e-243	NC_006068.1	1086172	1086939	+	768	YALI0_B08140g	GO:0003824;GO:0004604;GO:0019379;GO:0055114	K00390	-	YALI0B08140p [Yarrowia lipolytica CLIB122]	YALI0_B08140g	YALI0B08140g	2906800
gene1358	7261.94	1356.07	13167.8	9.71029	3.27951	1.45145e-244	3.0739e-243	NC_006068.1	1624812	1628726	+	3915	YALI0_B12188g	GO:0000166;GO:0005524;GO:0016020;GO:0016021;GO:0016887;GO:0042626;GO:0055085	K05658	[EC:7.6.2.2]	YALI0B12188p [Yarrowia lipolytica CLIB122]	YALI0_B12188g	YALI0B12188g	2907177
gene3578	760.118	97.1396	1423.1	14.65	3.87283	7.23019e-244	1.52118e-242	NC_006070.1	1843763	1844305	+	543	YALI0_D15136g	-	-	-	YALI0D15136p [Yarrowia lipolytica CLIB122]	YALI0_D15136g	YALI0D15136g	2910747
gene1041	1418.14	367.412	2468.86	6.7196	2.74837	5.16048e-242	1.08218e-240	NC_006068.1	639194	641113	-	1920	YALI0_B04708g	-	-	-	YALI0B04708p [Yarrowia lipolytica CLIB122]	YALI0_B04708g	YALI0B04708g	2906921
gene136	436.476	11.6839	861.269	73.7144	6.20388	2.42211e-241	5.06275e-240	NC_006067.1	381782	382300	-	519	YALI0_A03421g	-	-	-	YALI0A03421p [Yarrowia lipolytica CLIB122]	YALI0_A03421g	YALI0A03421g	2905992
gene4896	1591.66	386.192	2797.13	7.24283	2.85655	2.76357e-241	5.75773e-240	NC_006071.1	2191612	2192541	-	930	YALI0_E18348g	GO:0004032;GO:0005829;GO:0008106;GO:0016491;GO:0055114	-	-	YALI0E18348p [Yarrowia lipolytica CLIB122]	YALI0_E18348g	YALI0E18348g	2911714
gene5685	56999.7	29337.8	84661.5	2.88575	1.52894	8.12952e-238	1.6774e-236	NC_006072.1	82750	83947	+	1095	YALI0_F00506g	GO:0000166;GO:0003824;GO:0004356;GO:0005524;GO:0005737;GO:0006542;GO:0006807;GO:0016874	K01915	[EC:6.3.1.2]	YALI0F00506p [Yarrowia lipolytica CLIB122]	YALI0_F00506g	YALI0F00506g	2908248
gene1494	6120.5	2146.08	10094.9	4.70389	2.23386	6.56313e-235	1.34986e-233	NC_006068.1	2033246	2034154	+	909	YALI0_B15268g	GO:0004032;GO:0005829;GO:0008106;GO:0016491;GO:0055114	-	-	YALI0B15268p [Yarrowia lipolytica CLIB122]	YALI0_B15268g	YALI0B15268g	2907329
gene2057	21649.5	10280.4	33018.5	3.21178	1.68337	1.39485e-230	2.85056e-229	NC_006069.1	591369	592667	+	1299	YALI0_C04433g	GO:0003824;GO:0004587;GO:0005737;GO:0008483;GO:0010121;GO:0016740;GO:0019544;GO:0030170;GO:0055129	K00819	[EC:2.6.1.13]	YALI0C04433p [Yarrowia lipolytica CLIB122]	YALI0_C04433g	YALI0C04433g	2909646
gene5984	4362.37	1153.14	7571.61	6.5661	2.71504	5.63913e-230	1.14877e-228	NC_006072.1	1032419	1034119	-	1701	YALI0_F07062g	GO:0000329;GO:0005887;GO:0006855;GO:0016020;GO:0016021;GO:0055085	K08157	-	YALI0F07062p [Yarrowia lipolytica CLIB122]	YALI0_F07062g	YALI0F07062g	2908462
gene2942	4582.1	2084.81	7079.39	3.3957	1.76371	7.25212e-229	1.46804e-227	NC_006070.1	60023	61327	-	1305	YALI0_D00605g	GO:0003824;GO:0004121;GO:0004123;GO:0005737;GO:0016846;GO:0019343;GO:0019346;GO:0030170;GO:0071266	K01760	[EC:4.4.1.13]	YALI0D00605p [Yarrowia lipolytica CLIB122]	YALI0_D00605g	YALI0D00605g	2910397
gene4325	647.044	91.8941	1202.19	13.0824	3.70955	3.6155e-228	7.2958e-227	NC_006071.1	570275	572083	-	1809	YALI0_E05203g	GO:0000324;GO:0003824;GO:0004339;GO:0005976	K01178	[EC:3.2.1.3]	YALI0E05203p [Yarrowia lipolytica CLIB122]	YALI0_E05203g	YALI0E05203g	2912279
gene3497	43999.1	22958.6	65039.7	2.83292	1.50229	7.77059e-228	1.55339e-226	NC_006070.1	1624914	1625579	+	666	YALI0_D13104g	GO:0000027;GO:0003735;GO:0005622;GO:0005840;GO:0006412;GO:0022625	K02866	-	60S ribosomal protein L10 [Yarrowia lipolytica CLIB122]	YALI0_D13104g	YALI0D13104g	2910810
gene6683	18147.9	9260.88	27035	2.91927	1.54561	2.22829e-227	4.44067e-226	NC_006072.1	3001700	3003217	+	1518	YALI0_F22803g	GO:0005634;GO:0005737;GO:0008270	K06874	-	YALI0F22803p [Yarrowia lipolytica CLIB122]	YALI0_F22803g	YALI0F22803g	2908803
gene4513	35683.4	18574.1	52792.7	2.84228	1.50705	3.10111e-227	6.16094e-226	NC_006071.1	1166202	1169165	-	2964	YALI0_E09603g	GO:0004352;GO:0006520;GO:0016491;GO:0019551;GO:0055114	K15371	[EC:1.4.1.2]	YALI0E09603p [Yarrowia lipolytica CLIB122]	YALI0_E09603g	YALI0E09603g	2912559
gene2087	245.787	0	491.575	Inf	Inf	4.07585e-227	8.07245e-226	NC_006069.1	665580	666089	-	510	YALI0_C05236g	-	-	-	YALI0C05236p [Yarrowia lipolytica CLIB122]	YALI0_C05236g	YALI0C05236g	2909372
gene2571	910.578	234.953	1586.2	6.75113	2.75513	6.09429e-227	1.20329e-225	NC_006069.1	2342810	2343704	-	621	YALI0_C16621g	GO:0004784;GO:0005739;GO:0006801;GO:0016491;GO:0019430;GO:0030145;GO:0046872;GO:0055114	K04564	[EC:1.15.1.1]	YALI0C16621p [Yarrowia lipolytica CLIB122]	YALI0_C16621g	YALI0C16621g	2909290
gene3961	15968.6	2221.27	29715.9	13.3779	3.74178	1.99249e-226	3.91004e-225	NC_006070.1	3188962	3193098	+	4137	YALI0_D24189g	GO:0000166;GO:0005524;GO:0005886;GO:0008559;GO:0016020;GO:0016021;GO:0016887;GO:0042626;GO:0042908;GO:0055085	-	-	YALI0D24189p [Yarrowia lipolytica CLIB122]	YALI0_D24189g	YALI0D24189g	2911018
gene217	914.176	212.174	1616.18	7.61723	2.92927	2.20082e-225	4.2796e-224	NC_006067.1	565839	568877	+	3039	YALI0_A05533g	GO:0004252;GO:0005515;GO:0006508	-	-	YALI0A05533p [Yarrowia lipolytica CLIB122]	YALI0_A05533g	YALI0A05533g	2905930
gene3277	8125.95	1287.19	14964.7	11.6258	3.53926	3.94808e-225	7.65403e-224	NC_006070.1	1065570	1066538	-	969	YALI0_D08316g	GO:0097367;GO:1901135	-	-	YALI0D08316p [Yarrowia lipolytica CLIB122]	YALI0_D08316g	YALI0D08316g	2910699
gene3242	32746	17103.9	48388	2.82906	1.50032	3.28916e-224	6.3383e-223	NC_006070.1	970707	970976	-	270	YALI0_D07535g	GO:0016020;GO:0016021	-	-	YALI0D07535p [Yarrowia lipolytica CLIB122]	YALI0_D07535g	YALI0D07535g	7009497
gene558	1130.98	339.618	1922.35	5.66034	2.50089	5.36392e-224	1.03055e-222	NC_006067.1	1460887	1461945	-	1059	YALI0_A14476g	-	-	-	YALI0A14476p [Yarrowia lipolytica CLIB122]	YALI0_A14476g	YALI0A14476g	2906444
gene3683	1523.48	529.666	2517.3	4.75261	2.24872	1.90526e-223	3.64957e-222	NC_006070.1	2165181	2166382	+	1155	YALI0_D17666g	GO:0005802;GO:0043001	-	-	YALI0D17666p [Yarrowia lipolytica CLIB122]	YALI0_D17666g	YALI0D17666g	2911309
gene5701	40247.4	21212.2	59282.5	2.79473	1.48271	2.2005e-221	4.16537e-220	NC_006072.1	139058	140735	-	1254	YALI0_F00880g	GO:0005524;GO:0005829;GO:0006457;GO:0009408;GO:0031072;GO:0046872;GO:0051082	K09503	-	YALI0F00880p [Yarrowia lipolytica CLIB122]	YALI0_F00880g	YALI0F00880g	2908222
gene5125	420.904	44.3423	797.466	17.9843	4.16867	9.86849e-221	1.85707e-219	NC_006071.1	2759468	2761009	+	1542	YALI0_E23474g	GO:0004497;GO:0005506;GO:0016020;GO:0016021;GO:0016491;GO:0016705;GO:0016712;GO:0020037;GO:0046872;GO:0055114	-	-	YALI0E23474p [Yarrowia lipolytica CLIB122]	YALI0_E23474g	YALI0E23474g	2912418
gene799	448.807	53.7074	843.907	15.713	3.97389	1.21694e-220	2.27671e-219	NC_006067.1	2187026	2188030	+	1005	YALI0_A20350g	GO:0006629;GO:0016042;GO:0016787	-	-	YALI0A20350p [Yarrowia lipolytica CLIB122]	YALI0_A20350g	YALI0A20350g	2905927
gene1280	7029.03	3440.26	10617.8	3.08633	1.62589	1.39012e-218	2.57814e-217	NC_006068.1	1427011	1428386	+	1041	YALI0_B10406g	GO:0003824;GO:0004300;GO:0005739;GO:0006635;GO:0016853	K07511	[EC:4.2.1.17]	YALI0B10406p [Yarrowia lipolytica CLIB122]	YALI0_B10406g	YALI0B10406g	2906871
gene43	32656.9	11014	54299.9	4.93006	2.30161	2.10005e-217	3.87241e-216	NC_006067.1	151111	153015	+	1905	YALI0_A01089g	-	-	-	YALI0A01089p [Yarrowia lipolytica CLIB122]	YALI0_A01089g	YALI0A01089g	2906591
gene4940	742.803	83.8183	1401.79	16.7241	4.06386	1.13787e-216	2.09219e-215	NC_006071.1	2301251	2304415	-	3165	YALI0_E19338g	GO:0000166;GO:0005524;GO:0006812;GO:0008553;GO:0016020;GO:0016021;GO:0019829;GO:0098655;GO:1902600	K01536	-	YALI0E19338p [Yarrowia lipolytica CLIB122]	YALI0_E19338g	YALI0E19338g	2911758
gene3520	528.952	85.096	972.807	11.4319	3.51499	2.5873e-216	4.74362e-215	NC_006070.1	1688736	1689131	+	396	YALI0_D13662g	-	-	-	YALI0D13662p [Yarrowia lipolytica CLIB122]	YALI0_D13662g	YALI0D13662g	2910256
gene6100	9335.59	4709.6	13961.6	2.96449	1.56778	2.2413e-215	4.09755e-214	NC_006072.1	1330254	1334071	-	3759	YALI0_F09746g	GO:0000166;GO:0004672;GO:0004674;GO:0004697;GO:0005524;GO:0006468;GO:0007165;GO:0009272;GO:0016301;GO:0016310;GO:0016740;GO:0018105;GO:0035556;GO:0046872	K02677	[EC:2.7.11.13]	YALI0F09746p [Yarrowia lipolytica CLIB122]	YALI0_F09746g	YALI0F09746g	2908975
gene875	2077.56	827.176	3327.94	4.02326	2.00836	4.94399e-215	8.98742e-214	NC_006068.1	105982	107881	+	414	YALI0_B00770g	-	-	-	YALI0B00770p [Yarrowia lipolytica CLIB122]	YALI0_B00770g	YALI0B00770g	2907550
gene5658	750.961	181.297	1320.63	7.28433	2.8648	1.39808e-210	2.51302e-209	NC_006071.1	4172072	4173097	-	1026	YALI0_E34947g	GO:0016020;GO:0016021;GO:0016787	-	-	YALI0E34947p [Yarrowia lipolytica CLIB122]	YALI0_E34947g	YALI0E34947g	2912146
gene3609	4279.3	1734.92	6823.69	3.93314	1.97568	2.0437e-209	3.66324e-208	NC_006070.1	1951027	1953009	+	1983	YALI0_D15862g	-	-	-	YALI0D15862p [Yarrowia lipolytica CLIB122]	YALI0_D15862g	YALI0D15862g	2910181
gene524	1219.33	53.6015	2385.06	44.4962	5.47561	2.52895e-208	4.50785e-207	NC_006067.1	1386125	1386640	-	516	YALI0_A13497g	-	-	-	YALI0A13497p [Yarrowia lipolytica CLIB122]	YALI0_A13497g	YALI0A13497g	2906176
gene4924	15552	6397.62	24706.4	3.86181	1.94928	6.93211e-208	1.23223e-206	NC_006071.1	2264336	2265808	+	1374	YALI0_E18986g	GO:0005515;GO:0005634;GO:0005737;GO:0016567;GO:0019941;GO:0031386;GO:0031625	K08770	-	YALI0E18986p [Yarrowia lipolytica CLIB122]	YALI0_E18986g	YALI0E18986g	2911740
gene5294	395.79	18.1719	773.408	42.5606	5.41145	1.35862e-205	2.40836e-204	NC_006071.1	3223879	3225339	+	1461	YALI0_E27203g	GO:0005887;GO:0008519;GO:0015696;GO:0016020;GO:0016021;GO:0019740;GO:0072488	K03320	-	YALI0E27203p [Yarrowia lipolytica CLIB122]	YALI0_E27203g	YALI0E27203g	2912240
gene1945	9551.63	2298.15	16805.1	7.31245	2.87035	1.82617e-205	3.22825e-204	NC_006069.1	254003	255592	-	1590	YALI0_C01859g	GO:0004491;GO:0005739;GO:0006210;GO:0006573;GO:0006574;GO:0016020;GO:0016021;GO:0016491;GO:0016620;GO:0018478;GO:0055114	K00140	-	YALI0C01859p [Yarrowia lipolytica CLIB122]	YALI0_C01859g	YALI0C01859g	2909116
gene4212	4214.52	2000.17	6428.87	3.21417	1.68444	3.29305e-205	5.80536e-204	NC_006071.1	291082	291631	+	375	YALI0_E02662g	GO:0000329;GO:0000421;GO:0005773;GO:0005774;GO:0005776;GO:0005829;GO:0006914;GO:0006995;GO:0008429;GO:0015031;GO:0016020;GO:0016236;GO:0031410;GO:0033110	K08341	-	YALI0E02662p [Yarrowia lipolytica CLIB122]	YALI0_E02662g	YALI0E02662g	2912110
gene4191	1037.2	280.427	1793.97	6.39728	2.67746	2.70587e-204	4.75713e-203	NC_006071.1	241292	242911	+	1620	YALI0_E02200g	GO:0016020;GO:0016021	-	-	YALI0E02200p [Yarrowia lipolytica CLIB122]	YALI0_E02200g	YALI0E02200g	2912085
gene1523	2293.3	963.581	3623.02	3.75996	1.91072	2.82961e-204	4.9611e-203	NC_006068.1	2107255	2109435	-	2181	YALI0_B15906g	GO:0000165;GO:0000187;GO:0004672;GO:0004674;GO:0004708;GO:0005524;GO:0005737;GO:0006468;GO:0023014;GO:0032147	K11227	[EC:2.7.12.2]	YALI0B15906p [Yarrowia lipolytica CLIB122]	YALI0_B15906g	YALI0B15906g	2907026
gene5672	1353.51	478.658	2228.37	4.65545	2.21892	4.70343e-204	8.22395e-203	NC_006072.1	26182	27876	+	1695	YALI0_F00220g	GO:0005515;GO:0016020;GO:0016021	-	-	YALI0F00220p [Yarrowia lipolytica CLIB122]	YALI0_F00220g	YALI0F00220g	2908545
gene2321	8085.58	4138.5	12032.6	2.90749	1.53977	4.90948e-203	8.5377e-202	NC_006069.1	1457686	1459167	+	1482	YALI0_C10494g	GO:0000324;GO:0004177;GO:0005737;GO:0006508;GO:0008233;GO:0008237;GO:0008270;GO:0016787;GO:0046872;GO:0070006	K01268	[EC:3.4.11.22]	YALI0C10494p [Yarrowia lipolytica CLIB122]	YALI0_C10494g	YALI0C10494g	2909472
gene3728	2185.23	915.371	3455.09	3.77453	1.9163	1.43955e-202	2.48322e-201	NC_006070.1	2363899	2364560	+	357	YALI0_D18722g	-	-	-	YALI0D18722p [Yarrowia lipolytica CLIB122]	YALI0_D18722g	YALI0D18722g	2911135
gene1366	3511.08	1629.54	5392.63	3.30929	1.72652	1.64345e-202	2.82735e-201	NC_006068.1	1652565	1653578	-	1014	YALI0_B12386g	GO:0016491;GO:0055114	-	-	YALI0B12386p [Yarrowia lipolytica CLIB122]	YALI0_B12386g	YALI0B12386g	2907014
gene4199	4092.82	1947.31	6238.34	3.20357	1.67968	2.98514e-202	5.12183e-201	NC_006071.1	261158	262180	+	1023	YALI0_E02354g	GO:0000166;GO:0005524;GO:0005634;GO:0005737;GO:0005829;GO:0016226;GO:0046872;GO:0051536;GO:0051539	-	-	YALI0E02354p [Yarrowia lipolytica CLIB122]	YALI0_E02354g	YALI0E02354g	2912096
gene5814	2097.9	605.439	3590.36	5.93018	2.56808	6.54551e-198	1.11413e-196	NC_006072.1	482706	484853	-	2148	YALI0_F03432g	GO:0000045;GO:0000407;GO:0000422;GO:0000423;GO:0005737;GO:0005829;GO:0006914;GO:0015031;GO:0016236;GO:0019887;GO:0019898;GO:0019901;GO:0032147;GO:0034497;GO:0034727;GO:1990316	K08331	-	YALI0F03432p [Yarrowia lipolytica CLIB122]	YALI0_F03432g	YALI0F03432g	2907738
gene1790	2550.88	637.971	4463.79	6.99686	2.80671	1.44309e-196	2.44981e-195	NC_006068.1	2859968	2860897	-	930	YALI0_B21780g	GO:0004032;GO:0005829;GO:0008106;GO:0016491;GO:0055114	-	-	YALI0B21780p [Yarrowia lipolytica CLIB122]	YALI0_B21780g	YALI0B21780g	2907181
gene6036	1604.76	623.773	2585.74	4.14533	2.05149	6.38536e-196	1.08113e-194	NC_006072.1	1160445	1161371	+	927	YALI0_F08217g	GO:0006629;GO:0006644;GO:0008081;GO:0034479;GO:0046475	K18694	[EC:3.1.4.-]	YALI0F08217p [Yarrowia lipolytica CLIB122]	YALI0_F08217g	YALI0F08217g	2908510
gene4015	1933.36	800.272	3066.45	3.83175	1.93801	6.87188e-195	1.16044e-193	NC_006070.1	3404912	3406273	-	1362	YALI0_D25542g	GO:0003824;GO:0008410	K18703	[EC:2.8.3.13]	YALI0D25542p [Yarrowia lipolytica CLIB122]	YALI0_D25542g	YALI0D25542g	2910910
gene5900	2966.05	1365.35	4566.74	3.34473	1.74189	2.17369e-193	3.64193e-192	NC_006072.1	798995	801207	+	1425	YALI0_F05346g	GO:0006355;GO:0008270;GO:0043565;GO:0046872	-	-	YALI0F05346p [Yarrowia lipolytica CLIB122]	YALI0_F05346g	YALI0F05346g	2908194
gene5926	14934.4	8096.27	21772.5	2.6892	1.42718	6.20978e-192	1.03771e-190	NC_006072.1	870417	871601	+	1185	YALI0_F05874g	GO:0003824;GO:0004123;GO:0005737;GO:0016846;GO:0019343;GO:0019346;GO:0030170	K01758	[EC:4.4.1.1]	YALI0F05874p [Yarrowia lipolytica CLIB122]	YALI0_F05874g	YALI0F05874g	2908468
gene6204	17504.2	9557.34	25451.1	2.663	1.41305	2.47763e-191	4.11891e-190	NC_006072.1	1597373	1598803	-	1431	YALI0_F12111g	GO:0005829;GO:0016558	-	-	YALI0F12111p [Yarrowia lipolytica CLIB122]	YALI0_F12111g	YALI0F12111g	2907956
gene1057	4028.93	1647.59	6410.27	3.8907	1.96003	3.21556e-191	5.33185e-190	NC_006068.1	689156	691504	+	2349	YALI0_B05038g	GO:0000981;GO:0005634;GO:0006355;GO:0006357;GO:0008270	-	-	YALI0B05038p [Yarrowia lipolytica CLIB122]	YALI0_B05038g	YALI0B05038g	2906663
gene6753	31670.9	17060.1	46281.6	2.71285	1.43981	5.44774e-191	8.98667e-190	NC_006072.1	3182424	3183032	-	609	YALI0_F24431g	GO:0016020;GO:0016021;GO:0031305;GO:0033617	-	-	YALI0F24431p [Yarrowia lipolytica CLIB122]	YALI0_F24431g	YALI0F24431g	2908718
gene1594	1287.93	471.15	2104.71	4.46719	2.15937	2.33248e-189	3.82802e-188	NC_006068.1	2287011	2287502	+	492	YALI0_B17446g	-	-	-	YALI0B17446p [Yarrowia lipolytica CLIB122]	YALI0_B17446g	YALI0B17446g	2907513
gene4293	456.271	75.4222	837.12	11.0991	3.47237	6.76098e-189	1.10677e-187	NC_006071.1	508130	509113	+	984	YALI0_E04488g	GO:0006725;GO:0008198;GO:0008270;GO:0016491;GO:0016701;GO:0055114	-	-	YALI0E04488p [Yarrowia lipolytica CLIB122]	YALI0_E04488g	YALI0E04488g	2912199
gene4761	3724.89	1732.7	5717.08	3.29952	1.72226	1.83435e-188	2.99517e-187	NC_006071.1	1812150	1812722	+	573	YALI0_E15180g	GO:0005509	K19932	-	YALI0E15180p [Yarrowia lipolytica CLIB122]	YALI0_E15180g	YALI0E15180g	2911990
gene6275	1232.11	444.321	2019.9	4.54604	2.18461	3.10747e-188	5.06108e-187	NC_006072.1	1847948	1849552	+	1605	YALI0_F13739g	GO:0005887;GO:0006855;GO:0016020;GO:0016021;GO:0055085	-	-	YALI0F13739p [Yarrowia lipolytica CLIB122]	YALI0_F13739g	YALI0F13739g	2908680
gene7018	9161.81	4882.43	13441.2	2.75297	1.46099	6.8028e-188	1.10515e-186	NC_006072.1	3826140	3827036	-	897	YALI0_F30613g	GO:0005856;GO:0030507;GO:0044853;GO:0051015;GO:0051016;GO:0051017	-	-	YALI0F30613p [Yarrowia lipolytica CLIB122]	YALI0_F30613g	YALI0F30613g	2907653
gene304	1128.08	391.12	1865.04	4.76846	2.25352	7.35254e-188	1.19144e-186	NC_006067.1	748278	749111	+	834	YALI0_A07733g	GO:0003824;GO:0005739;GO:0051750	K12663	[EC:5.3.3.21]	YALI0A07733p [Yarrowia lipolytica CLIB122]	YALI0_A07733g	YALI0A07733g	2906089
gene5512	8940.31	1703	16177.6	9.49945	3.24784	9.89189e-188	1.5989e-186	NC_006071.1	3787123	3788313	+	1191	YALI0_E31845g	GO:0000977;GO:0000981;GO:0003676;GO:0005634;GO:0006357	-	-	YALI0E31845p [Yarrowia lipolytica CLIB122]	YALI0_E31845g	YALI0E31845g	2911879
gene2289	14287	7835.01	20739.1	2.64697	1.40434	3.2967e-185	5.27555e-184	NC_006069.1	1331677	1333057	+	546	YALI0_C09735g	-	-	-	YALI0C09735p [Yarrowia lipolytica CLIB122]	YALI0_C09735g	YALI0C09735g	2909793
gene5661	38480.6	21785.3	55175.9	2.53272	1.34069	8.28049e-182	1.31524e-180	NC_006071.1	4188366	4190297	-	1932	YALI0_E35046g	GO:0000166;GO:0005524;GO:0005634;GO:0005737;GO:0005829;GO:0005886;GO:0006616;GO:0006986;GO:0016192;GO:0016887;GO:0031072;GO:0034605;GO:0034620;GO:0042026;GO:0042623;GO:0044183;GO:0051082;GO:0051085;GO:0051787	K03283	-	YALI0E35046p [Yarrowia lipolytica CLIB122]	YALI0_E35046g	YALI0E35046g	2912280
gene6069	3117.77	1044.99	5190.55	4.96709	2.3124	8.94691e-182	1.41466e-180	NC_006072.1	1257657	1259795	+	2139	YALI0_F09009g	GO:0000166;GO:0000915;GO:0000917;GO:0003924;GO:0005525;GO:0005940;GO:0015630;GO:0031105;GO:0032186;GO:0061640;GO:0097271	-	-	YALI0F09009p [Yarrowia lipolytica CLIB122]	YALI0_F09009g	YALI0F09009g	2908099
gene5485	2634.38	1220.12	4048.63	3.31822	1.73041	1.20438e-181	1.89889e-180	NC_006071.1	3692879	3694525	-	1647	YALI0_E31339g	GO:0006511;GO:0030433;GO:0030968;GO:0030970;GO:0036513;GO:0051082;GO:0061630;GO:0070936;GO:1990381	-	-	YALI0E31339p [Yarrowia lipolytica CLIB122]	YALI0_E31339g	YALI0E31339g	2911464
gene3262	2116.8	937.394	3296.2	3.51634	1.81408	4.9564e-181	7.7954e-180	NC_006070.1	1019302	1021067	+	1476	YALI0_D07942g	GO:0016491;GO:0016620;GO:0055114	K00129	[EC:1.2.1.5]	YALI0D07942p [Yarrowia lipolytica CLIB122]	YALI0_D07942g	YALI0D07942g	2910948
gene6658	5498.16	2501.6	8494.72	3.39572	1.76372	8.48439e-180	1.31826e-178	NC_006072.1	2949656	2950543	+	888	YALI0_F22231g	GO:0000079;GO:0019901;GO:0051726	-	-	YALI0F22231p [Yarrowia lipolytica CLIB122]	YALI0_F22231g	YALI0F22231g	2908824
gene7072	3466.65	1700.79	5232.51	3.07652	1.6213	1.55933e-179	2.41696e-178	NC_006072.1	3939078	3943524	-	4392	YALI0_F31845g	GO:0000166;GO:0000324;GO:0005524;GO:0015127;GO:0015723;GO:0016020;GO:0016021;GO:0016887;GO:0042626;GO:0055085	-	-	YALI0F31845p [Yarrowia lipolytica CLIB122]	YALI0_F31845g	YALI0F31845g	2908091
gene7035	4733.69	1993.66	7473.72	3.74875	1.90641	4.06211e-178	6.23602e-177	NC_006072.1	3862638	3864342	-	1479	YALI0_F30987g	GO:0004096;GO:0004601;GO:0005777;GO:0006979;GO:0016491;GO:0020037;GO:0042542;GO:0042744;GO:0046872;GO:0055114;GO:0098869	K03781	[EC:1.11.1.6]	YALI0F30987p [Yarrowia lipolytica CLIB122]	YALI0_F30987g	YALI0F30987g	2907657
gene1805	2258.33	1023.92	3492.74	3.41114	1.77025	4.86748e-178	7.45456e-177	NC_006068.1	2900390	2901412	+	1023	YALI0_B22132g	GO:0070628	-	-	YALI0B22132p [Yarrowia lipolytica CLIB122]	YALI0_B22132g	YALI0B22132g	2906697
gene3770	205.409	2.41477	408.404	169.128	7.40197	1.18963e-177	1.81327e-176	NC_006070.1	2490213	2491886	+	1674	YALI0_D19646g	GO:0015179;GO:0016020;GO:0016021;GO:0022857;GO:0055085;GO:1902475	-	-	YALI0D19646p [Yarrowia lipolytica CLIB122]	YALI0_D19646g	YALI0D19646g	2911180
gene6596	840.852	260.684	1421.02	5.45111	2.44655	1.25294e-177	1.90524e-176	NC_006072.1	2776477	2777583	-	1107	YALI0_F20834g	GO:0005634;GO:0005737;GO:0005770;GO:0005794;GO:0006511;GO:0016020;GO:0016021;GO:0016567;GO:0051788;GO:0061630	-	-	YALI0F20834p [Yarrowia lipolytica CLIB122]	YALI0_F20834g	YALI0F20834g	2908952
gene2074	694.272	189.796	1198.75	6.31598	2.65901	2.67155e-177	4.04324e-176	NC_006069.1	637397	638221	+	825	YALI0_C04884g	GO:0016020;GO:0016021	-	-	YALI0C04884p [Yarrowia lipolytica CLIB122]	YALI0_C04884g	YALI0C04884g	2909545
gene1939	2581.05	1208.44	3953.66	3.2717	1.71004	4.88651e-177	7.37805e-176	NC_006069.1	240891	242201	+	1311	YALI0_C01738g	GO:0005515	K14818	-	YALI0C01738p [Yarrowia lipolytica CLIB122]	YALI0_C01738g	YALI0C01738g	2909111
gene5492	3196.9	1037.4	5356.41	5.16331	2.3683	8.58262e-177	1.28679e-175	NC_006071.1	3715362	3716432	+	1071	YALI0_E31493g	-	-	-	YALI0E31493p [Yarrowia lipolytica CLIB122]	YALI0_E31493g	YALI0E31493g	2911552
gene6711	860.598	274.035	1447.16	5.28092	2.40079	2.34749e-175	3.487e-174	NC_006072.1	3082929	3084992	-	2064	YALI0_F23507g	GO:0016020;GO:0016021	-	-	YALI0F23507p [Yarrowia lipolytica CLIB122]	YALI0_F23507g	YALI0F23507g	2908764
gene2841	1248.91	303.175	2194.66	7.23891	2.85577	3.68746e-175	5.45217e-174	NC_006069.1	3060086	3062176	+	2091	YALI0_C22792g	GO:0005507;GO:0008131;GO:0009308;GO:0016491;GO:0046872;GO:0048038;GO:0055114	K00276	[EC:1.4.3.21]	YALI0C22792p [Yarrowia lipolytica CLIB122]	YALI0_C22792g	YALI0C22792g	2909633
gene2149	7900.4	1681.8	14119	8.39518	3.06956	3.82681e-175	5.6452e-174	NC_006069.1	881681	883540	-	1860	YALI0_C06578g	GO:0005337;GO:0005887;GO:0016020;GO:0016021;GO:1901642	K03317	-	YALI0C06578p [Yarrowia lipolytica CLIB122]	YALI0_C06578g	YALI0C06578g	2909320
gene4901	10030	5524.61	14535.5	2.63104	1.39563	1.15755e-174	1.70368e-173	NC_006071.1	2200955	2202364	+	1410	YALI0_E18480g	GO:0005737;GO:0006457;GO:0019901;GO:0031072;GO:0050821;GO:0051082;GO:0051087	K09554	-	YALI0E18480p [Yarrowia lipolytica CLIB122]	YALI0_E18480g	YALI0E18480g	2911719
gene2196	2506.18	1175.92	3836.43	3.26248	1.70597	3.49228e-174	5.11643e-173	NC_006069.1	1007128	1008153	+	1026	YALI0_C07612g	-	-	-	YALI0C07612p [Yarrowia lipolytica CLIB122]	YALI0_C07612g	YALI0C07612g	2910034
gene5567	13257.1	3143.69	23370.5	7.43411	2.89416	3.76708e-172	5.42004e-171	NC_006071.1	3922949	3923878	+	930	YALI0_E32967g	-	-	-	YALI0E32967p [Yarrowia lipolytica CLIB122]	YALI0_E32967g	YALI0E32967g	2912553
gene1901	2362.8	528.467	4197.14	7.9421	2.98952	6.5734e-172	9.41552e-171	NC_006069.1	106453	108015	+	1563	YALI0_C00803g	GO:0000324;GO:0004180;GO:0004185;GO:0006508;GO:0008233;GO:0016787;GO:0046938;GO:0051603	K13289	[EC:3.4.16.5]	YALI0C00803p [Yarrowia lipolytica CLIB122]	YALI0_C00803g	YALI0C00803g	2909165
gene7020	1536.32	641.207	2431.42	3.79195	1.92294	1.15613e-170	1.64499e-169	NC_006072.1	3829004	3830308	-	1305	YALI0_F30657g	-	-	-	YALI0F30657p [Yarrowia lipolytica CLIB122]	YALI0_F30657g	YALI0F30657g	2907655
gene5817	685.67	117.488	1253.85	10.6722	3.41578	1.56929e-170	2.22791e-169	NC_006072.1	493975	495564	+	1590	YALI0_F03498g	GO:0015179;GO:0016020;GO:0016021;GO:0022857;GO:0055085;GO:1902475	-	-	YALI0F03498p [Yarrowia lipolytica CLIB122]	YALI0_F03498g	YALI0F03498g	2907741
gene976	7193.82	3926.75	10460.9	2.66401	1.4136	1.14038e-168	1.60127e-167	NC_006068.1	455269	456042	+	774	YALI0_B03124g	GO:0008171;GO:0032259	K00545	[EC:2.1.1.6]	YALI0B03124p [Yarrowia lipolytica CLIB122]	YALI0_B03124g	YALI0B03124g	2906895
gene5312	3826.5	1957.91	5695.08	2.90875	1.5404	1.18777e-168	1.66418e-167	NC_006071.1	3261479	3262669	-	1191	YALI0_E27632g	GO:0000166;GO:0004672;GO:0004674;GO:0004683;GO:0005516;GO:0005524;GO:0006468;GO:0034599	K08794	[EC:2.7.11.17]	YALI0E27632p [Yarrowia lipolytica CLIB122]	YALI0_E27632g	YALI0E27632g	2911794
gene4977	2950.99	378.477	5523.51	14.5941	3.86731	1.08119e-167	1.51155e-166	NC_006071.1	2392824	2394050	-	1227	YALI0_E20163g	GO:0005975;GO:0006044;GO:0006046;GO:0008448;GO:0016787;GO:0016810;GO:0046872;GO:0047419	K01443	[EC:3.5.1.25]	YALI0E20163p [Yarrowia lipolytica CLIB122]	YALI0_E20163g	YALI0E20163g	2911804
gene4531	1672.01	727.998	2616.02	3.59345	1.84537	2.91897e-166	4.05433e-165	NC_006071.1	1230257	1230910	-	654	YALI0_E09999g	GO:0008080	K22842	[EC:2.3.1.271]	YALI0E09999p [Yarrowia lipolytica CLIB122]	YALI0_E09999g	YALI0E09999g	2912580
gene6212	7860.39	4171.33	11549.4	2.76876	1.46924	3.29001e-166	4.55983e-165	NC_006072.1	1647760	1648569	+	729	YALI0_F12331g	GO:0005886;GO:0005938;GO:0006897;GO:0016020;GO:0016021;GO:0030866;GO:0031505;GO:0032185;GO:0045121	-	-	YALI0F12331p [Yarrowia lipolytica CLIB122]	YALI0_F12331g	YALI0F12331g	2907955
gene4679	48072	28171.9	67972.1	2.41276	1.27069	3.36956e-166	4.66002e-165	NC_006071.1	1595877	1597934	+	2058	YALI0_E13255g	GO:0000166;GO:0005524;GO:0005634;GO:0005829	K09485	-	YALI0E13255p [Yarrowia lipolytica CLIB122]	YALI0_E13255g	YALI0E13255g	2912024
gene6913	810.494	262.169	1358.82	5.18298	2.37378	7.71671e-165	1.05808e-163	NC_006072.1	3569816	3571642	+	1827	YALI0_F28017g	GO:0005887;GO:0016020;GO:0016021;GO:0055085	-	-	YALI0F28017p [Yarrowia lipolytica CLIB122]	YALI0_F28017g	YALI0F28017g	2908350
gene6604	8612.07	4802.41	12421.7	2.58656	1.37103	9.95862e-165	1.36257e-163	NC_006072.1	2794053	2796419	-	2367	YALI0_F21010g	GO:0000166;GO:0003824;GO:0004637;GO:0004641;GO:0005524;GO:0005829;GO:0006164;GO:0006189;GO:0008152;GO:0009113;GO:0016874;GO:0046872	K11788	-	YALI0F21010p [Yarrowia lipolytica CLIB122]	YALI0_F21010g	YALI0F21010g	2907698
gene1023	510.807	109.166	912.448	8.35835	3.06322	5.29463e-164	7.16786e-163	NC_006068.1	570065	572650	-	2586	YALI0_B04290g	GO:0004725;GO:0005634;GO:0006470;GO:0008138;GO:0016311;GO:0016787;GO:0016791;GO:0033260;GO:0035335	K04459	-	YALI0B04290p [Yarrowia lipolytica CLIB122]	YALI0_B04290g	YALI0B04290g	2906755
gene4938	750.419	73.7164	1427.12	19.3596	4.27498	5.48682e-163	7.31994e-162	NC_006071.1	2294957	2297587	+	2631	YALI0_E19294g	GO:0005887;GO:0016020;GO:0016021;GO:0035672;GO:0035673;GO:0055085	-	-	YALI0E19294p [Yarrowia lipolytica CLIB122]	YALI0_E19294g	YALI0E19294g	2911756
gene5186	899.226	311.373	1487.08	4.77587	2.25576	7.71722e-163	1.02742e-161	NC_006071.1	2959076	2961613	+	2538	YALI0_E24739g	-	-	-	YALI0E24739p [Yarrowia lipolytica CLIB122]	YALI0_E24739g	YALI0E24739g	2912663
gene13	10523.8	3482.63	17564.9	5.04358	2.33445	4.95587e-162	6.57063e-161	NC_006067.1	45641	47158	-	1518	YALI0_A00396g	-	-	-	YALI0A00396p [Yarrowia lipolytica CLIB122]	YALI0_A00396g	YALI0A00396g	2905829
gene722	1452.37	288.791	2615.94	9.05826	3.17923	9.08325e-161	1.19197e-159	NC_006067.1	1966025	1967554	-	1530	YALI0_A18469g	GO:0000122;GO:0000977;GO:0001227;GO:0003677;GO:0005634;GO:0006355;GO:0030154;GO:0043565	-	-	YALI0A18469p [Yarrowia lipolytica CLIB122]	YALI0_A18469g	YALI0A18469g	2906050
gene903	26379.3	8460.68	44297.9	5.23574	2.38839	2.15629e-158	2.81239e-157	NC_006068.1	236387	238051	-	1665	YALI0_B01408g	GO:0000324;GO:0004180;GO:0004185;GO:0006508;GO:0008233;GO:0016787;GO:0046938;GO:0051603	K13289	[EC:3.4.16.5]	YALI0B01408p [Yarrowia lipolytica CLIB122]	YALI0_B01408g	YALI0B01408g	2907575
gene317	2357.54	1144.5	3570.57	3.11976	1.64143	2.77493e-158	3.61191e-157	NC_006067.1	780423	781736	-	1314	YALI0_A08063g	GO:0000166;GO:0000289;GO:0000932;GO:0003723;GO:0003729;GO:0005515;GO:0005737;GO:0015031;GO:0017148;GO:0030371;GO:0043488	-	-	YALI0A08063p [Yarrowia lipolytica CLIB122]	YALI0_A08063g	YALI0A08063g	2906106
gene4895	1795.32	821.498	2769.15	3.37085	1.75311	8.25511e-157	1.06801e-155	NC_006071.1	2189937	2191304	-	1368	YALI0_E18326g	GO:0005634;GO:0006355;GO:0008270	-	-	YALI0E18326p [Yarrowia lipolytica CLIB122]	YALI0_E18326g	YALI0E18326g	2911713
gene24	2154.47	1036.02	3272.91	3.15911	1.65952	5.66967e-155	7.29104e-154	NC_006067.1	79377	80057	-	681	YALI0_A00660g	-	-	-	YALI0A00660p [Yarrowia lipolytica CLIB122]	YALI0_A00660g	YALI0A00660g	2905993
gene6398	17960.8	8482.55	27439.1	3.23477	1.69366	7.94662e-155	1.01987e-153	NC_006072.1	2204481	2206223	+	1743	YALI0_F16489g	GO:0000328;GO:0004180;GO:0004181;GO:0006807;GO:0016787;GO:0046872;GO:0051603	K01293	[EC:3.4.17.4]	YALI0F16489p [Yarrowia lipolytica CLIB122]	YALI0_F16489g	YALI0F16489g	2908881
gene2526	3423.45	1790.07	5056.83	2.82493	1.49822	1.48521e-154	1.90231e-153	NC_006069.1	2151479	2153833	+	2355	YALI0_C15400g	GO:0000398;GO:0003676;GO:0003723;GO:0010494	-	-	YALI0C15400p [Yarrowia lipolytica CLIB122]	YALI0_C15400g	YALI0C15400g	2909406
gene2227	344.001	54.1434	633.859	11.707	3.5493	6.37708e-154	8.15174e-153	NC_006069.1	1142297	1144324	+	2028	YALI0_C08393g	GO:0005615;GO:0008081;GO:0016787	-	-	YALI0C08393p [Yarrowia lipolytica CLIB122]	YALI0_C08393g	YALI0C08393g	2909324
gene4887	621.648	150.059	1093.24	7.28538	2.865	2.6535e-153	3.37848e-152	NC_006071.1	2141986	2143617	-	1632	YALI0_E18139g	GO:0016020;GO:0016021;GO:0022857;GO:0055085	-	-	YALI0E18139p [Yarrowia lipolytica CLIB122]	YALI0_E18139g	YALI0E18139g	2911701
gene4692	11521.1	4228.45	18813.8	4.44934	2.15359	4.99578e-153	6.34811e-152	NC_006071.1	1640604	1641653	+	1050	YALI0_E13574g	-	-	-	YALI0E13574p [Yarrowia lipolytica CLIB122]	YALI0_E13574g	YALI0E13574g	2911477
gene4687	11097.3	6460.37	15734.2	2.43549	1.28421	2.38003e-151	3.00643e-150	NC_006071.1	1626924	1628288	-	1365	YALI0_E13464g	GO:0004177;GO:0006508;GO:0016787;GO:0030145;GO:0046872	K14213	[EC:3.4.13.9]	YALI0E13464p [Yarrowia lipolytica CLIB122]	YALI0_E13464g	YALI0E13464g	2912030
gene1142	2006.05	189.372	3822.73	20.1864	4.33531	2.90189e-151	3.65126e-150	NC_006068.1	943872	944885	+	1014	YALI0_B07117g	GO:0004032;GO:0005829;GO:0008106;GO:0016491;GO:0055114	K18097	[EC:1.1.1.156]	YALI0B07117p [Yarrowia lipolytica CLIB122]	YALI0_B07117g	YALI0B07117g	2907198
gene4138	13665.7	8027.19	19304.2	2.40485	1.26595	3.761e-151	4.70455e-150	NC_006071.1	120740	123553	-	2814	YALI0_E01056g	GO:0003824;GO:0004329;GO:0004477;GO:0004488;GO:0005524;GO:0005737;GO:0009113;GO:0009257;GO:0055114	K00288	-	YALI0E01056p [Yarrowia lipolytica CLIB122]	YALI0_E01056g	YALI0E01056g	2912574
gene3411	6114.54	3434.4	8794.67	2.56076	1.35657	7.94094e-151	9.89457e-150	NC_006070.1	1397934	1400108	-	2175	YALI0_D11132g	GO:0005515;GO:0005634;GO:0005737;GO:0010992;GO:0043130;GO:0043161	K14018	-	YALI0D11132p [Yarrowia lipolytica CLIB122]	YALI0_D11132g	YALI0D11132g	2910727
gene2547	9856.17	2723.67	16988.7	6.23741	2.64095	8.54418e-151	1.06256e-149	NC_006069.1	2269188	2270321	-	1134	YALI0_C15939g	-	-	-	YALI0C15939p [Yarrowia lipolytica CLIB122]	YALI0_C15939g	YALI0C15939g	2909444
gene6394	6052.02	649.09	11455	17.6477	4.14141	9.87937e-151	1.22623e-149	NC_006072.1	2192338	2193996	+	1659	YALI0_F16401g	-	K01426	[EC:3.5.1.4]	YALI0F16401p [Yarrowia lipolytica CLIB122]	YALI0_F16401g	YALI0F16401g	2908878
gene2881	283.231	33.4311	533.031	15.9442	3.99496	3.99951e-150	4.93555e-149	NC_006069.1	3175730	3177106	+	1377	YALI0_C23661g	GO:0000324;GO:0004180;GO:0004185;GO:0006508;GO:0008233;GO:0016787;GO:0046938;GO:0051603	K13289	[EC:3.4.16.5]	YALI0C23661p [Yarrowia lipolytica CLIB122]	YALI0_C23661g	YALI0C23661g	2909590
gene3569	4398.75	1871.71	6925.79	3.70025	1.88762	1.00581e-149	1.23883e-148	NC_006070.1	1813602	1816252	-	2394	YALI0_D14916g	GO:0003972;GO:0005524;GO:0005637;GO:0006388;GO:0008033;GO:0008081;GO:0016310;GO:0016874;GO:0051730	K14679	[EC:6.5.1.3]	YALI0D14916p [Yarrowia lipolytica CLIB122]	YALI0_D14916g	YALI0D14916g	2911332
gene1927	1074.15	119.029	2029.26	17.0485	4.09157	2.54326e-149	3.11453e-148	NC_006069.1	197136	197957	+	822	YALI0_C01419g	GO:0004342;GO:0005737;GO:0005975;GO:0006043;GO:0006044;GO:0006046;GO:0006048;GO:0016787;GO:0019262;GO:0042802	K02564	[EC:3.5.99.6]	YALI0C01419p [Yarrowia lipolytica CLIB122]	YALI0_C01419g	YALI0C01419g	2909122
gene1887	2205.48	987.133	3423.83	3.46846	1.7943	4.11244e-149	5.01702e-148	NC_006069.1	64272	69708	-	5307	YALI0_C00495g	GO:0000166;GO:0000287;GO:0005524;GO:0005886;GO:0015914;GO:0016020;GO:0016021;GO:0045332;GO:0140326	K01530	[EC:7.6.2.1]	YALI0C00495p [Yarrowia lipolytica CLIB122]	YALI0_C00495g	YALI0C00495g	2909174
gene730	1364.14	593.075	2135.21	3.60024	1.84809	6.79169e-149	8.26988e-148	NC_006067.1	2004083	2004685	-	603	YALI0_A18678g	-	-	-	YALI0A18678p [Yarrowia lipolytica CLIB122]	YALI0_A18678g	YALI0A18678g	2906237
gene2787	8644	4999.24	12288.8	2.45813	1.29756	1.3517e-148	1.64278e-147	NC_006069.1	2897517	2899286	-	1770	YALI0_C21604g	GO:0000324;GO:0004180;GO:0004185;GO:0006508;GO:0008233;GO:0016787;GO:0046938;GO:0051603	K13289	[EC:3.4.16.5]	YALI0C21604p [Yarrowia lipolytica CLIB122]	YALI0_C21604g	YALI0C21604g	2909825
gene3983	924.854	348.95	1500.76	4.30079	2.1046	3.74072e-147	4.49517e-146	NC_006070.1	3284310	3285563	-	1254	YALI0_D24728g	-	-	-	YALI0D24728p [Yarrowia lipolytica CLIB122]	YALI0_D24728g	YALI0D24728g	2910556
gene4128	1773.38	836.488	2710.28	3.24007	1.69603	7.51011e-147	8.99111e-146	NC_006071.1	84740	86191	-	1452	YALI0_E00836g	GO:0004414;GO:0009058;GO:0009086;GO:0009092;GO:0016747	K00641	-	YALI0E00836p [Yarrowia lipolytica CLIB122]	YALI0_E00836g	YALI0E00836g	2912900
gene3343	2782.06	1440.78	4123.34	2.86188	1.51696	2.60614e-146	3.10847e-145	NC_006070.1	1231205	1232629	+	1425	YALI0_D09735g	GO:0005634;GO:0005737;GO:0005770;GO:0005794;GO:0006511;GO:0008270;GO:0016020;GO:0016021;GO:0016567;GO:0046872;GO:0051788;GO:0061630	-	-	YALI0D09735p [Yarrowia lipolytica CLIB122]	YALI0_D09735g	YALI0D09735g	2910919
gene921	6051.73	3433.96	8669.5	2.52464	1.33608	4.30326e-146	5.1232e-145	NC_006068.1	274591	275445	+	855	YALI0_B01804g	GO:0016020;GO:0016021	-	-	YALI0B01804p [Yarrowia lipolytica CLIB122]	YALI0_B01804g	YALI0B01804g	2907133
gene4105	14829.9	8837.61	20822.2	2.35609	1.23639	5.11196e-146	6.07472e-145	NC_006071.1	29203	30618	-	1416	YALI0_E00330g	GO:0016755;GO:0055091	-	-	YALI0E00330p [Yarrowia lipolytica CLIB122]	YALI0_E00330g	YALI0E00330g	2912868
gene3870	3416.4	1728.57	5104.23	2.95285	1.56211	8.44796e-146	1.0002e-144	NC_006070.1	2805783	2807468	-	1686	YALI0_D22110g	-	-	-	YALI0D22110p [Yarrowia lipolytica CLIB122]	YALI0_D22110g	YALI0D22110g	2910155
gene1258	1176.17	492.227	1860.1	3.77895	1.91799	1.0382e-145	1.22691e-144	NC_006068.1	1358179	1360551	+	2175	YALI0_B09977g	GO:0005515;GO:0005634;GO:0008380	K10259	-	YALI0B09977p [Yarrowia lipolytica CLIB122]	YALI0_B09977g	YALI0B09977g	2907587
gene3603	10994.7	6482.75	15506.7	2.39199	1.25821	1.98224e-145	2.33824e-144	NC_006070.1	1923548	1924813	-	1266	YALI0_D15708g	GO:0003995;GO:0016491;GO:0016627;GO:0050660;GO:0055114	-	-	YALI0D15708p [Yarrowia lipolytica CLIB122]	YALI0_D15708g	YALI0D15708g	2910175
gene6797	956.661	371.286	1542.04	4.15323	2.05423	2.95062e-144	3.44884e-143	NC_006072.1	3272428	3273888	+	1461	YALI0_F25465g	GO:0016020;GO:0016021	-	-	YALI0F25465p [Yarrowia lipolytica CLIB122]	YALI0_F25465g	YALI0F25465g	2908502
gene1262	4549.59	2528.32	6570.87	2.59891	1.37791	4.21376e-144	4.91631e-143	NC_006068.1	1376262	1377956	+	1695	YALI0_B10021g	GO:0000055;GO:0005634;GO:0005737;GO:0015031;GO:0043023	K07562	-	YALI0B10021p [Yarrowia lipolytica CLIB122]	YALI0_B10021g	YALI0B10021g	2907242
gene2274	853.79	315.539	1392.04	4.41163	2.14131	6.02447e-144	7.00344e-143	NC_006069.1	1283325	1284098	+	774	YALI0_C09394g	-	-	-	YALI0C09394p [Yarrowia lipolytica CLIB122]	YALI0_C09394g	YALI0C09394g	2909763
gene5718	3325.78	960.322	5691.23	5.92638	2.56715	1.20963e-143	1.40112e-142	NC_006072.1	202194	204728	-	2535	YALI0_F01232g	GO:0005524;GO:0046872	K15083	-	YALI0F01232p [Yarrowia lipolytica CLIB122]	YALI0_F01232g	YALI0F01232g	2908216
gene3121	9927.17	671.355	19183	28.5735	4.83661	1.21287e-143	1.40234e-142	NC_006070.1	615654	619565	-	3765	YALI0_D04873g	GO:0000166;GO:0005388;GO:0005524;GO:0005623;GO:0006811;GO:0006816;GO:0006874;GO:0016020;GO:0016021;GO:0070588	K01537	[EC:7.2.2.10]	YALI0D04873p [Yarrowia lipolytica CLIB122]	YALI0_D04873g	YALI0D04873g	2910658
gene4856	1197.02	509.004	1885.03	3.70337	1.88884	2.77888e-143	3.20721e-142	NC_006071.1	2060910	2061827	+	918	YALI0_E17457g	GO:0000064;GO:0016020;GO:0016021;GO:1990575	K15109	-	YALI0E17457p [Yarrowia lipolytica CLIB122]	YALI0_E17457g	YALI0E17457g	2911671
gene6534	5897.02	1914.23	9879.81	5.16126	2.36772	4.05914e-143	4.67639e-142	NC_006072.1	2598118	2599299	+	1182	YALI0_F19470g	GO:0004325;GO:0005739;GO:0006779;GO:0006783;GO:0016829	K01772	-	YALI0F19470p [Yarrowia lipolytica CLIB122]	YALI0_F19470g	YALI0F19470g	2907673
gene40	6124.88	1022.83	11226.9	10.9763	3.45632	4.29323e-143	4.93722e-142	NC_006067.1	136940	140176	+	3237	YALI0_A01023g	GO:0000166;GO:0005524;GO:0006812;GO:0008553;GO:0016020;GO:0016021;GO:0019829;GO:0098655;GO:1902600	K01536	-	YALI0A01023p [Yarrowia lipolytica CLIB122]	YALI0_A01023g	YALI0A01023g	2906594
gene6516	584.287	175.386	993.187	5.66286	2.50153	1.66906e-141	1.90575e-140	NC_006072.1	2550150	2551007	+	858	YALI0_F19052g	GO:0004143;GO:0006654;GO:0016020;GO:0016021;GO:0016310;GO:0030176	K16368	[EC:2.7.1.174]	YALI0F19052p [Yarrowia lipolytica CLIB122]	YALI0_F19052g	YALI0F19052g	2909033
gene6339	1578.28	738.094	2418.46	3.27663	1.71221	1.01453e-140	1.15635e-139	NC_006072.1	2047545	2049317	+	1773	YALI0_F15191g	-	-	-	YALI0F15191p [Yarrowia lipolytica CLIB122]	YALI0_F15191g	YALI0F15191g	2908927
gene1903	2280.72	617.686	3943.75	6.38472	2.67462	2.31873e-140	2.62885e-139	NC_006069.1	112133	113668	+	1536	YALI0_C00847g	GO:0005887;GO:0006855;GO:0016020;GO:0016021;GO:0055085	-	-	YALI0C00847p [Yarrowia lipolytica CLIB122]	YALI0_C00847g	YALI0C00847g	2909170
gene6820	155.283	1.19551	309.37	258.776	8.01556	2.78172e-140	3.1482e-139	NC_006072.1	3338925	3340139	+	1215	YALI0_F25993g	GO:0016020;GO:0016021	-	-	YALI0F25993p [Yarrowia lipolytica CLIB122]	YALI0_F25993g	YALI0F25993g	2907686
gene4382	3245.39	1750.41	4740.37	2.70815	1.43731	2.79892e-140	3.16209e-139	NC_006071.1	743613	746037	-	1890	YALI0_E06501g	GO:0000166;GO:0004672;GO:0004674;GO:0005524;GO:0006468;GO:0016301;GO:0016310;GO:0016740;GO:0018105;GO:0035556	K13303	[EC:2.7.11.1]	YALI0E06501p [Yarrowia lipolytica CLIB122]	YALI0_E06501g	YALI0E06501g	2912396
gene4581	6085.43	2566.04	9604.81	3.74305	1.90421	2.91526e-140	3.28773e-139	NC_006071.1	1357785	1358978	-	1194	YALI0_E11099g	GO:0003824;GO:0003985;GO:0003988;GO:0005739;GO:0005777;GO:0006635;GO:0016740;GO:0016746;GO:0016747;GO:0046872	K00626	[EC:2.3.1.9]	YALI0E11099p [Yarrowia lipolytica CLIB122]	YALI0_E11099g	YALI0E11099g	2911520
gene5013	17763.5	10790.6	24736.4	2.2924	1.19686	1.70768e-139	1.91912e-138	NC_006071.1	2485879	2487366	-	1488	YALI0_E20977g	GO:0003824;GO:0006571;GO:0008483;GO:0008793;GO:0009058;GO:0009073;GO:0030170;GO:0047536;GO:1901605	K00838	-	YALI0E20977p [Yarrowia lipolytica CLIB122]	YALI0_E20977g	YALI0E20977g	2911847
gene6076	194.649	8.04608	381.252	47.3836	5.56632	2.96174e-139	3.31684e-138	NC_006072.1	1280874	1282040	+	1167	YALI0_F09163g	GO:0004190;GO:0005576;GO:0006508;GO:0008233;GO:0009277;GO:0016787;GO:0030163;GO:0031505	-	-	YALI0F09163p [Yarrowia lipolytica CLIB122]	YALI0_F09163g	YALI0F09163g	2908338
gene956	17841.5	8334.16	27348.9	3.28154	1.71437	4.76619e-139	5.32833e-138	NC_006068.1	399623	401599	+	1977	YALI0_B02662g	-	-	-	YALI0B02662p [Yarrowia lipolytica CLIB122]	YALI0_B02662g	YALI0B02662g	2907201
gene6027	377.793	75.5415	680.044	9.00226	3.17029	7.83636e-139	8.74538e-138	NC_006072.1	1138063	1139556	-	1494	YALI0_F08063g	GO:0000329;GO:0005887;GO:0006855;GO:0016020;GO:0016021;GO:0055085	-	-	YALI0F08063p [Yarrowia lipolytica CLIB122]	YALI0_F08063g	YALI0F08063g	2908986
gene621	3117.31	1678.99	4555.63	2.71331	1.44005	1.05189e-138	1.17187e-137	NC_006067.1	1638624	1640084	+	1461	YALI0_A16060g	GO:0005773;GO:0005774;GO:0005887;GO:0016020;GO:0016021;GO:0055085	-	-	YALI0A16060p [Yarrowia lipolytica CLIB122]	YALI0_A16060g	YALI0A16060g	2906009
gene5318	8173.71	3782.44	12565	3.32193	1.73202	2.38739e-138	2.65049e-137	NC_006071.1	3277236	3278081	-	846	YALI0_E27742g	GO:0000122;GO:0000790;GO:0000978;GO:0000981;GO:0001080;GO:0003700;GO:0005654;GO:0005667;GO:0006355;GO:0010033;GO:0045944;GO:1903833	K09464	-	YALI0E27742p [Yarrowia lipolytica CLIB122]	YALI0_E27742g	YALI0E27742g	2912217
gene4700	2532.35	1323.41	3741.29	2.82702	1.49928	4.61518e-138	5.11496e-137	NC_006071.1	1661051	1663518	-	1716	YALI0_E13750g	GO:0004672;GO:0004674;GO:0005524;GO:0005634;GO:0005737;GO:0006468;GO:0042770;GO:0044773	K23785	[EC:2.7.11.1]	YALI0E13750p [Yarrowia lipolytica CLIB122]	YALI0_E13750g	YALI0E13750g	2911484
gene4435	166972	84564.1	249379	2.94899	1.56022	6.20442e-138	6.84085e-137	NC_006071.1	908935	909591	-	657	YALI0_E07832g	GO:0005199;GO:0009277;GO:0031505	-	-	YALI0E07832p [Yarrowia lipolytica CLIB122]	YALI0_E07832g	YALI0E07832g	2912461
gene814	2720.57	1439.41	4001.73	2.78012	1.47515	1.00862e-137	1.10638e-136	NC_006067.1	2218061	2219491	-	1431	YALI0_A20658g	-	-	-	YALI0A20658p [Yarrowia lipolytica CLIB122]	YALI0_A20658g	YALI0A20658g	2905807
gene2701	4641.97	2628.69	6655.25	2.53177	1.34015	1.30991e-137	1.43441e-136	NC_006069.1	2667055	2668128	+	1074	YALI0_C19668g	GO:0003955;GO:0010181;GO:0016491;GO:0055114	-	-	YALI0C19668p [Yarrowia lipolytica CLIB122]	YALI0_C19668g	YALI0C19668g	2909923
gene6068	929.169	367.691	1490.65	4.05408	2.01937	3.04518e-137	3.32328e-136	NC_006072.1	1254029	1256059	-	2031	YALI0_F08987g	-	-	-	YALI0F08987p [Yarrowia lipolytica CLIB122]	YALI0_F08987g	YALI0F08987g	2908098
gene5427	6567.24	3838.6	9295.87	2.42168	1.27601	1.49298e-136	1.62106e-135	NC_006071.1	3557902	3559785	+	1884	YALI0_E30129g	GO:0003824;GO:0004357;GO:0006750	K11204	[EC:6.3.2.2]	YALI0E30129p [Yarrowia lipolytica CLIB122]	YALI0_E30129g	YALI0E30129g	2911465
gene690	2067.45	1045.44	3089.46	2.95519	1.56325	2.41244e-136	2.61497e-135	NC_006067.1	1835614	1838250	-	2637	YALI0_A17809g	-	K17491	-	YALI0A17809p [Yarrowia lipolytica CLIB122]	YALI0_A17809g	YALI0A17809g	2906320
gene1905	8931.29	4557.26	13305.3	2.91959	1.54577	1.46629e-135	1.58671e-134	NC_006069.1	122841	124829	+	1989	YALI0_C00891g	GO:0004672;GO:0004674;GO:0005524;GO:0005634;GO:0005737;GO:0006468;GO:0030003;GO:0035556	K08286	[EC:2.7.11.-]	YALI0C00891p [Yarrowia lipolytica CLIB122]	YALI0_C00891g	YALI0C00891g	2909169
gene5559	959.98	278.634	1641.33	5.89063	2.55842	2.58996e-134	2.79324e-133	NC_006071.1	3886857	3888401	+	1545	YALI0_E32769g	GO:0016020;GO:0016021;GO:0016747	-	-	YALI0E32769p [Yarrowia lipolytica CLIB122]	YALI0_E32769g	YALI0E32769g	2911905
gene6135	1701.96	830.03	2573.9	3.10097	1.63272	2.8649e-134	3.08458e-133	NC_006072.1	1421083	1422488	+	900	YALI0_F10541g	GO:0000994;GO:0001030;GO:0001031;GO:0001032;GO:0005634;GO:0005737;GO:0016480	-	-	YALI0F10541p [Yarrowia lipolytica CLIB122]	YALI0_F10541g	YALI0F10541g	2908964
gene992	471.01	126.53	815.49	6.44505	2.68819	4.28896e-134	4.61009e-133	NC_006068.1	496400	497136	-	648	YALI0_B03542g	-	-	-	YALI0B03542p [Yarrowia lipolytica CLIB122]	YALI0_B03542g	YALI0B03542g	2906831
gene2025	963.59	388.207	1538.97	3.96431	1.98707	4.81155e-134	5.16317e-133	NC_006069.1	492782	493687	-	417	YALI0_C03696g	GO:0000151;GO:0046872	-	-	YALI0C03696p [Yarrowia lipolytica CLIB122]	YALI0_C03696g	YALI0C03696g	2909913
gene848	208.76	16.1183	401.401	24.9034	4.63827	9.66407e-134	1.03185e-132	NC_006068.1	1930	3360	-	1431	YALI0_B00132g	GO:0004190;GO:0005576;GO:0006508;GO:0008233;GO:0009277;GO:0016787;GO:0030163;GO:0031505	-	-	YALI0B00132p [Yarrowia lipolytica CLIB122]	YALI0_B00132g	YALI0B00132g	2906607
gene898	1877.81	418.612	3337.01	7.9716	2.99487	2.26772e-133	2.40926e-132	NC_006068.1	215862	217451	+	1590	YALI0_B01298g	GO:0004028;GO:0006081;GO:0016491;GO:0016620;GO:0055114	K00128	[EC:1.2.1.3]	YALI0B01298p [Yarrowia lipolytica CLIB122]	YALI0_B01298g	YALI0B01298g	2906667
gene7074	4702.33	2699.07	6705.59	2.48441	1.3129	7.64732e-133	8.09783e-132	NC_006072.1	3951130	3953322	-	2193	YALI0_F31911g	GO:0005096;GO:0005623;GO:0006886;GO:0017137;GO:0090630	K20168	-	YALI0F31911p [Yarrowia lipolytica CLIB122]	YALI0_F31911g	YALI0F31911g	2907695
gene3388	2251.88	1178.61	3325.15	2.82125	1.49633	8.2029e-131	8.55902e-130	NC_006070.1	1328446	1329988	-	1038	YALI0_D10659g	GO:0006740;GO:0016491	-	-	YALI0D10659p [Yarrowia lipolytica CLIB122]	YALI0_D10659g	YALI0D10659g	2910434
gene4817	772.697	291.253	1254.14	4.30601	2.10635	1.83179e-130	1.90512e-129	NC_006071.1	1960511	1961260	-	750	YALI0_E16555g	-	-	-	YALI0E16555p [Yarrowia lipolytica CLIB122]	YALI0_E16555g	YALI0E16555g	2911601
gene6458	43533.1	27447.2	59619	2.17213	1.11911	1.00945e-129	1.0431e-128	NC_006072.1	2372007	2373383	+	1377	YALI0_F17820g	GO:0000166;GO:0004354;GO:0005829;GO:0006520;GO:0006537;GO:0016491;GO:0016639;GO:0055114	K00262	[EC:1.4.1.4]	YALI0F17820p [Yarrowia lipolytica CLIB122]	YALI0_F17820g	YALI0F17820g	2908646
gene2238	4588.6	1945.46	7231.75	3.71725	1.89424	2.02483e-129	2.0856e-128	NC_006069.1	1176117	1176893	+	777	YALI0_C08635g	GO:0003676	-	-	YALI0C08635p [Yarrowia lipolytica CLIB122]	YALI0_C08635g	YALI0C08635g	2909335
gene6824	2115.06	1098.43	3131.7	2.85106	1.5115	2.65713e-129	2.7325e-128	NC_006072.1	3353269	3354594	+	1326	YALI0_F26081g	-	-	-	YALI0F26081p [Yarrowia lipolytica CLIB122]	YALI0_F26081g	YALI0F26081g	2909040
gene1296	3174.76	1759.79	4589.74	2.60811	1.383	2.72059e-129	2.79328e-128	NC_006068.1	1465820	1467123	-	975	YALI0_B10780g	GO:0000149;GO:0005484;GO:0005886;GO:0006886;GO:0006887;GO:0006906;GO:0012505;GO:0016020;GO:0016021;GO:0016192;GO:0031201;GO:0048278	K08486	-	YALI0B10780p [Yarrowia lipolytica CLIB122]	YALI0_B10780g	YALI0B10780g	2907524
gene4335	705.117	170.645	1239.59	7.26416	2.8608	4.88003e-129	5.00242e-128	NC_006071.1	595511	598129	-	2619	YALI0_E05423g	GO:0004222;GO:0006508;GO:0008237;GO:0016020;GO:0016021	-	-	YALI0E05423p [Yarrowia lipolytica CLIB122]	YALI0_E05423g	YALI0E05423g	2912315
gene2700	485.421	18.4893	952.353	51.5082	5.68673	5.15072e-129	5.27147e-128	NC_006069.1	2664858	2665463	-	606	YALI0_C19646g	GO:0003955;GO:0010181;GO:0016491;GO:0055114	K03809	[EC:1.6.5.2]	YALI0C19646p [Yarrowia lipolytica CLIB122]	YALI0_C19646g	YALI0C19646g	2909922
gene4258	15013	6775.74	23250.2	3.43139	1.77879	1.25185e-128	1.27916e-127	NC_006071.1	416379	418016	+	1638	YALI0_E03718g	-	-	-	YALI0E03718p [Yarrowia lipolytica CLIB122]	YALI0_E03718g	YALI0E03718g	2912162
gene6217	51528.4	32622.4	70434.4	2.15908	1.11042	1.52376e-128	1.55206e-127	NC_006072.1	1665482	1667830	+	2349	YALI0_F12463g	GO:0000166;GO:0005524	-	-	YALI0F12463p [Yarrowia lipolytica CLIB122]	YALI0_F12463g	YALI0F12463g	2908070
gene3052	1549.59	558.778	2540.41	4.54637	2.18471	1.91341e-128	1.94585e-127	NC_006070.1	404000	407578	+	3156	YALI0_D03179g	GO:0004100;GO:0006031;GO:0016020;GO:0016021;GO:0016758;GO:0030428	K00698	[EC:2.4.1.16]	YALI0D03179p [Yarrowia lipolytica CLIB122]	YALI0_D03179g	YALI0D03179g	2910565
gene46	766.988	291.176	1242.8	4.2682	2.09363	2.48038e-128	2.51447e-127	NC_006067.1	160621	161847	+	1227	YALI0_A01155g	-	-	-	YALI0A01155p [Yarrowia lipolytica CLIB122]	YALI0_A01155g	YALI0A01155g	2905732
gene2096	5837.16	3453.06	8221.25	2.38086	1.25148	2.78155e-128	2.8109e-127	NC_006069.1	695390	695707	-	318	YALI0_C05467g	GO:0004362;GO:0005634;GO:0009055;GO:0015035;GO:0022900;GO:0034599;GO:0045454;GO:0055114;GO:0098869	-	-	YALI0C05467p [Yarrowia lipolytica CLIB122]	YALI0_C05467g	YALI0C05467g	2910096
gene4844	461.73	37.1954	886.264	23.8273	4.57454	7.31574e-128	7.36972e-127	NC_006071.1	2033848	2034297	-	450	YALI0_E17171g	-	-	-	YALI0E17171p [Yarrowia lipolytica CLIB122]	YALI0_E17171g	YALI0E17171g	2911657
gene3882	5606.44	2889.31	8323.58	2.88082	1.52648	2.34884e-127	2.35508e-126	NC_006070.1	2848351	2851290	-	2940	YALI0_D22396g	GO:0005576;GO:0005975	K01183	[EC:3.2.1.14]	YALI0D22396p [Yarrowia lipolytica CLIB122]	YALI0_D22396g	YALI0D22396g	2910328
gene2593	308.132	17.2641	598.999	34.6963	5.11671	2.68375e-127	2.68668e-126	NC_006069.1	2418418	2420019	+	1602	YALI0_C17105g	GO:0005887;GO:0006855;GO:0016020;GO:0016021;GO:0055085	-	-	YALI0C17105p [Yarrowia lipolytica CLIB122]	YALI0_C17105g	YALI0C17105g	2910085
gene3011	296.832	51.7896	541.874	10.463	3.38722	2.73055e-127	2.72927e-126	NC_006070.1	249293	249889	-	597	YALI0_D02189g	-	-	-	YALI0D02189p [Yarrowia lipolytica CLIB122]	YALI0_D02189g	YALI0D02189g	2910517
gene4347	4530.63	2633.75	6427.51	2.44045	1.28714	1.09974e-126	1.09752e-125	NC_006071.1	635125	636192	-	1068	YALI0_E05687g	GO:0016020;GO:0016021	-	-	YALI0E05687p [Yarrowia lipolytica CLIB122]	YALI0_E05687g	YALI0E05687g	2912326
gene4512	476.861	136.954	816.767	5.9638	2.57623	1.39499e-126	1.39e-125	NC_006071.1	1162297	1162902	+	606	YALI0_E09581g	-	-	-	YALI0E09581p [Yarrowia lipolytica CLIB122]	YALI0_E09581g	YALI0E09581g	2912558
gene2937	183.26	11.3239	355.195	31.3668	4.97117	2.38274e-126	2.35231e-125	NC_006070.1	49795	51426	-	1632	YALI0_D00495g	GO:0006865;GO:0016020;GO:0016021;GO:0022857;GO:0055085	-	-	YALI0D00495p [Yarrowia lipolytica CLIB122]	YALI0_D00495g	YALI0D00495g	2910392
gene4996	5898.13	3509.28	8286.98	2.36145	1.23967	4.58112e-126	4.51568e-125	NC_006071.1	2440649	2441371	-	723	YALI0_E20603g	GO:0004359;GO:0005829;GO:0008614;GO:0042819;GO:0042823;GO:1903600	K08681	[EC:4.3.3.6]	YALI0E20603p [Yarrowia lipolytica CLIB122]	YALI0_E20603g	YALI0E20603g	2911822
gene1245	13108.2	2725.92	23490.5	8.61749	3.10727	1.14685e-125	1.12528e-124	NC_006068.1	1321966	1323684	+	1719	YALI0_B09647g	GO:0003842;GO:0005759;GO:0006560;GO:0010133;GO:0016491;GO:0016620;GO:0055114	K00294	[EC:1.2.1.88]	YALI0B09647p [Yarrowia lipolytica CLIB122]	YALI0_B09647g	YALI0B09647g	2907124
gene1696	2271.82	1210.99	3332.66	2.752	1.46048	1.98043e-125	1.94022e-124	NC_006068.1	2604832	2605758	+	927	YALI0_B19756g	GO:0016020;GO:0016021	-	-	YALI0B19756p [Yarrowia lipolytica CLIB122]	YALI0_B19756g	YALI0B19756g	2907131
gene1813	4808	1984.54	7631.46	3.84546	1.94316	8.55453e-125	8.34262e-124	NC_006068.1	2934434	2936474	+	1605	YALI0_B22308g	GO:0000166;GO:0001678;GO:0004340;GO:0004396;GO:0005524;GO:0005536;GO:0005829;GO:0005975;GO:0006096;GO:0008865;GO:0016301;GO:0016310;GO:0016740;GO:0016773;GO:0019158;GO:0046835;GO:0051156	K00844	[EC:2.7.1.1]	YALI0B22308p [Yarrowia lipolytica CLIB122]	YALI0_B22308g	YALI0B22308g	2906865
gene6790	89480.5	57351.8	121609	2.1204	1.08434	1.17549e-124	1.14463e-123	NC_006072.1	3258579	3260540	-	1962	YALI0_F25289g	GO:0000166;GO:0005524;GO:0005634;GO:0005737;GO:0005829;GO:0005886;GO:0006616;GO:0006986;GO:0016192;GO:0016887;GO:0031072;GO:0034605;GO:0034620;GO:0042026;GO:0042623;GO:0044183;GO:0051082;GO:0051085;GO:0051787	K03283	-	YALI0F25289p [Yarrowia lipolytica CLIB122]	YALI0_F25289g	YALI0F25289g	2908034
gene6867	388.298	92.0516	684.545	7.43653	2.89463	2.45377e-124	2.37853e-123	NC_006072.1	3433276	3434769	+	1494	YALI0_F26983g	GO:0004499;GO:0050660;GO:0050661;GO:0055114	-	-	YALI0F26983p [Yarrowia lipolytica CLIB122]	YALI0_F26983g	YALI0F26983g	2908347
gene2609	980.207	422.264	1538.15	3.64263	1.86498	6.42629e-124	6.21047e-123	NC_006069.1	2457888	2458676	-	789	YALI0_C17567g	-	-	-	YALI0C17567p [Yarrowia lipolytica CLIB122]	YALI0_C17567g	YALI0C17567g	2910075
gene6674	610.459	211.985	1008.93	4.75947	2.2508	4.36116e-123	4.19574e-122	NC_006072.1	2984987	2985400	+	414	YALI0_F22605g	GO:0006144;GO:0016787;GO:0033971	K07127	[EC:3.5.2.17]	YALI0F22605p [Yarrowia lipolytica CLIB122]	YALI0_F22605g	YALI0F22605g	2908816
gene6103	1005.87	440.259	1571.49	3.56947	1.83571	2.56306e-122	2.44749e-121	NC_006072.1	1337790	1338263	-	474	YALI0_F09812g	-	K22762	[EC:3.4.-.-]	YALI0F09812p [Yarrowia lipolytica CLIB122]	YALI0_F09812g	YALI0F09812g	2908978
gene4898	8432.62	4629.31	12235.9	2.64314	1.40225	5.34546e-122	5.08175e-121	NC_006071.1	2193960	2195786	-	1827	YALI0_E18414g	GO:0005484;GO:0005886;GO:0006887;GO:0006906;GO:0015031;GO:0019905;GO:0031201	K19950	-	YALI0E18414p [Yarrowia lipolytica CLIB122]	YALI0_E18414g	YALI0E18414g	2911716
gene4000	5235	3122.97	7347.02	2.35258	1.23424	1.52359e-121	1.44415e-120	NC_006070.1	3354718	3355995	-	1278	YALI0_D25168g	GO:0003824;GO:0006520;GO:0016765;GO:0019346;GO:0030170	K17069	-	YALI0D25168p [Yarrowia lipolytica CLIB122]	YALI0_D25168g	YALI0D25168g	2910781
gene3272	924.354	394.311	1454.4	3.68845	1.88301	2.51902e-121	2.38064e-120	NC_006070.1	1047586	1049295	-	1710	YALI0_D08206g	GO:0004620;GO:0004622;GO:0004623;GO:0005737;GO:0006629;GO:0009395;GO:0016042;GO:0016787;GO:0046475	-	-	YALI0D08206p [Yarrowia lipolytica CLIB122]	YALI0_D08206g	YALI0D08206g	2910696
gene5202	12283.7	7694.13	16873.2	2.193	1.13291	9.46638e-121	8.92008e-120	NC_006071.1	3006177	3006767	+	591	YALI0_E25091g	GO:0004601;GO:0005737;GO:0005739;GO:0005777;GO:0008379;GO:0016209;GO:0016491;GO:0034599;GO:0042744;GO:0045454;GO:0051920;GO:0055114;GO:0098869	K14171	[EC:1.11.1.15]	YALI0E25091p [Yarrowia lipolytica CLIB122]	YALI0_E25091g	YALI0E25091g	2912705
gene1850	730.479	282.435	1178.52	4.17273	2.06099	1.21444e-120	1.14268e-119	NC_006068.1	3024560	3025003	-	444	YALI0_B23111g	-	-	-	YALI0B23111p [Yarrowia lipolytica CLIB122]	YALI0_B23111g	YALI0B23111g	7009427
gene1550	16150.1	7187.46	25112.7	3.49396	1.80486	1.82101e-120	1.7109e-119	NC_006068.1	2171818	2173368	+	1551	YALI0_B16500g	GO:0004252;GO:0005615;GO:0006508;GO:0008233;GO:0008236;GO:0016787	K01336	[EC:3.4.21.48]	YALI0B16500p [Yarrowia lipolytica CLIB122]	YALI0_B16500g	YALI0B16500g	2907445
gene6207	1678.98	861.182	2496.78	2.89925	1.53568	4.21664e-119	3.9386e-118	NC_006072.1	1604278	1605315	+	1038	YALI0_F12177g	GO:0004439;GO:0016020;GO:0016021;GO:0046855;GO:0046856	-	-	YALI0F12177p [Yarrowia lipolytica CLIB122]	YALI0_F12177g	YALI0F12177g	2907959
gene1743	4114.32	2422.58	5806.07	2.39664	1.26102	1.54789e-118	1.44372e-117	NC_006068.1	2740275	2744686	-	3153	YALI0_B20834g	GO:0000166;GO:0005524;GO:0005634;GO:0008568;GO:0016887;GO:0031122;GO:0051013	K22766	[EC:3.6.4.-]	YALI0B20834p [Yarrowia lipolytica CLIB122]	YALI0_B20834g	YALI0B20834g	2907326
gene1681	1994.83	1062.48	2927.19	2.75507	1.46209	1.87152e-118	1.74304e-117	NC_006068.1	2560981	2561952	+	972	YALI0_B19360g	GO:0000287;GO:0003941;GO:0005524;GO:0006520;GO:0006563;GO:0008721;GO:0018114;GO:0030170;GO:0030378;GO:0042866;GO:0070179	-	-	YALI0B19360p [Yarrowia lipolytica CLIB122]	YALI0_B19360g	YALI0B19360g	2907426
gene2130	71562.8	46474.6	96651	2.07965	1.05634	7.14121e-118	6.60305e-117	NC_006069.1	802296	803318	+	1023	YALI0_C06171g	GO:0016491;GO:0055114	-	-	YALI0C06171p [Yarrowia lipolytica CLIB122]	YALI0_C06171g	YALI0C06171g	2909238
gene316	8209.27	2955.88	13462.7	4.55454	2.18731	1.2751e-117	1.17562e-116	NC_006067.1	776896	778776	+	1881	YALI0_A08041g	GO:0004114;GO:0004115;GO:0007165;GO:0008081;GO:0016787;GO:0019933;GO:0019934;GO:0046069;GO:0046872;GO:0047555	K01120	[EC:3.1.4.17]	YALI0A08041p [Yarrowia lipolytica CLIB122]	YALI0_A08041g	YALI0A08041g	2906114
gene833	155.98	6.8955	305.064	44.241	5.46731	2.05057e-117	1.88517e-116	NC_006067.1	2260945	2262576	+	1632	YALI0_A21131g	-	-	-	YALI0A21131p [Yarrowia lipolytica CLIB122]	YALI0_A21131g	YALI0A21131g	2906443
gene1075	3842.66	2253.89	5431.42	2.40979	1.26891	2.31661e-117	2.12367e-116	NC_006068.1	751318	752748	+	1431	YALI0_B05522g	GO:0000324;GO:0004177;GO:0005737;GO:0006508;GO:0008233;GO:0008237;GO:0008270;GO:0016787;GO:0046872;GO:0070006	K01267	[EC:3.4.11.21]	YALI0B05522p [Yarrowia lipolytica CLIB122]	YALI0_B05522g	YALI0B05522g	2907621
gene3104	6311.98	3509.13	9114.83	2.59746	1.3771	3.25874e-117	2.97882e-116	NC_006070.1	559233	560222	+	990	YALI0_D04466g	GO:0000977;GO:0000981;GO:0003700;GO:0005634;GO:0006355;GO:0006357	-	-	YALI0D04466p [Yarrowia lipolytica CLIB122]	YALI0_D04466g	YALI0D04466g	2910640
gene2641	2019.9	901.931	3137.88	3.47907	1.7987	6.84122e-117	6.23581e-116	NC_006069.1	2518710	2520725	-	2016	YALI0_C18315g	GO:0005507;GO:0008131;GO:0009308;GO:0016491;GO:0046872;GO:0048038;GO:0055114	K00276	[EC:1.4.3.21]	YALI0C18315p [Yarrowia lipolytica CLIB122]	YALI0_C18315g	YALI0C18315g	2909556
gene3324	597.552	215.403	979.702	4.54823	2.1853	3.30244e-115	2.97637e-114	NC_006070.1	1184119	1185471	+	1353	YALI0_D09317g	GO:0015095;GO:0015693;GO:0016020;GO:0016021;GO:1903830	-	-	YALI0D09317p [Yarrowia lipolytica CLIB122]	YALI0_D09317g	YALI0D09317g	2910840
gene4663	2469.19	1110.5	3827.88	3.44699	1.78534	1.9973e-114	1.78505e-113	NC_006071.1	1557363	1559114	-	1752	YALI0_E12859g	GO:0003824	K22133	[EC:6.2.1.8]	YALI0E12859p [Yarrowia lipolytica CLIB122]	YALI0_E12859g	YALI0E12859g	2912850
gene4979	666.331	255.732	1076.93	4.21117	2.07422	5.26186e-114	4.68313e-113	NC_006071.1	2398147	2399541	+	1395	YALI0_E20207g	GO:0000166;GO:0001678;GO:0004340;GO:0004396;GO:0005524;GO:0005536;GO:0005829;GO:0005975;GO:0006096;GO:0008865;GO:0016301;GO:0016310;GO:0016740;GO:0016773;GO:0019158;GO:0046835;GO:0051156	K00844	[EC:2.7.1.1]	YALI0E20207p [Yarrowia lipolytica CLIB122]	YALI0_E20207g	YALI0E20207g	2911808
gene957	240.038	37.0601	443.016	11.954	3.57942	7.76728e-114	6.88434e-113	NC_006068.1	403234	406863	+	3630	YALI0_B02684g	GO:0000166;GO:0005507;GO:0005524;GO:0006812;GO:0016020;GO:0016021;GO:0019829;GO:0030001;GO:0035434;GO:0043682;GO:0046872;GO:0072511;GO:0098655	-	-	YALI0B02684p [Yarrowia lipolytica CLIB122]	YALI0_B02684g	YALI0B02684g	2906896
gene2687	653.524	251.243	1055.81	4.20232	2.07119	2.06135e-112	1.81699e-111	NC_006069.1	2642147	2642869	+	723	YALI0_C19338g	GO:0005515	-	-	YALI0C19338p [Yarrowia lipolytica CLIB122]	YALI0_C19338g	YALI0C19338g	2909956
gene708	1107.13	523.875	1690.39	3.22672	1.69007	2.64286e-112	2.32637e-111	NC_006067.1	1888231	1889388	-	1158	YALI0_A18161g	GO:0003676;GO:0003723	K18738	-	YALI0A18161p [Yarrowia lipolytica CLIB122]	YALI0_A18161g	YALI0A18161g	2906276
gene2141	245.849	40.3452	451.354	11.1873	3.48379	2.89374e-112	2.54372e-111	NC_006069.1	852842	854389	+	1548	YALI0_C06424g	GO:0005215;GO:0005351;GO:0005887;GO:0010255;GO:0016020;GO:0016021;GO:0022857;GO:0034219;GO:0051594;GO:0055085;GO:1902600	-	-	YALI0C06424p [Yarrowia lipolytica CLIB122]	YALI0_C06424g	YALI0C06424g	2909312
gene187	4051.68	2328.89	5774.47	2.4795	1.31005	8.68682e-111	7.60482e-110	NC_006067.1	495546	497903	-	2358	YALI0_A04697g	GO:0000166;GO:0004672;GO:0004674;GO:0005524;GO:0005634;GO:0005737;GO:0005886;GO:0006468;GO:0016301;GO:0016310;GO:0016740	K08286	[EC:2.7.11.-]	YALI0A04697p [Yarrowia lipolytica CLIB122]	YALI0_A04697g	YALI0A04697g	2906596
gene5019	796.204	248.915	1343.49	5.3974	2.43226	1.18234e-110	1.03366e-109	NC_006071.1	2510568	2511743	-	1176	YALI0_E21109g	GO:0004553;GO:0005576;GO:0005975;GO:0009277;GO:0009986;GO:0042124;GO:0042973	-	-	YALI0E21109p [Yarrowia lipolytica CLIB122]	YALI0_E21109g	YALI0E21109g	2911882
gene6814	156.544	9.2204	303.868	32.9561	5.04247	1.51657e-110	1.32226e-109	NC_006072.1	3327323	3328195	-	873	YALI0_F25839g	GO:0003723;GO:0004521;GO:0005576;GO:0006401;GO:0033897;GO:0090502	K01166	[EC:4.6.1.19]	YALI0F25839p [Yarrowia lipolytica CLIB122]	YALI0_F25839g	YALI0F25839g	2907689
gene2393	4633.53	2821.32	6445.74	2.28466	1.19198	3.43927e-110	2.99454e-109	NC_006069.1	1686460	1686846	-	387	YALI0_C12166g	-	-	-	YALI0C12166p [Yarrowia lipolytica CLIB122]	YALI0_C12166g	YALI0C12166g	2910117
gene1036	2261.47	791.058	3731.88	4.71759	2.23805	1.66502e-109	1.44384e-108	NC_006068.1	625164	627938	-	2775	YALI0_B04598g	GO:0000045;GO:0000422;GO:0001934;GO:0005773;GO:0005774;GO:0006914;GO:0015031;GO:0016020;GO:0019898;GO:0019901;GO:0030242;GO:0034045;GO:0034727;GO:0061709;GO:0061723;GO:1990316	K08330	-	YALI0B04598p [Yarrowia lipolytica CLIB122]	YALI0_B04598g	YALI0B04598g	2906710
gene3184	3234.94	1904.84	4565.05	2.39655	1.26096	1.71652e-109	1.48649e-108	NC_006070.1	805693	806346	+	654	YALI0_D06281g	GO:0004582;GO:0005783;GO:0005789;GO:0006486;GO:0006506;GO:0016740;GO:0016757;GO:0019348;GO:0035269	K00721	[EC:2.4.1.83]	YALI0D06281p [Yarrowia lipolytica CLIB122]	YALI0_D06281g	YALI0D06281g	2910867
gene5765	6804.92	4267.61	9342.23	2.1891	1.13034	3.75897e-109	3.25085e-108	NC_006072.1	348798	349190	-	393	YALI0_F02277g	GO:0005768;GO:0016020;GO:0016021;GO:0032511;GO:2000009	-	-	YALI0F02277p [Yarrowia lipolytica CLIB122]	YALI0_F02277g	YALI0F02277g	2908127
gene4958	33448.3	22013.9	44882.8	2.03884	1.02775	6.25875e-109	5.39817e-108	NC_006071.1	2356906	2357364	-	459	YALI0_E19745g	GO:0004364;GO:0004602;GO:0005635;GO:0005783;GO:0016020;GO:0016021;GO:0098869	K00799	[EC:2.5.1.18]	YALI0E19745p [Yarrowia lipolytica CLIB122]	YALI0_E19745g	YALI0E19745g	2911780
gene3016	3747.62	1601.11	5894.12	3.68126	1.8802	1.36522e-108	1.17435e-107	NC_006070.1	276587	278050	-	1464	YALI0_D02321g	GO:0003979;GO:0005634;GO:0005829;GO:0006024;GO:0016491;GO:0016616;GO:0051287;GO:0055114	K00012	[EC:1.1.1.22]	YALI0D02321p [Yarrowia lipolytica CLIB122]	YALI0_D02321g	YALI0D02321g	2910522
gene1518	9756	6246.66	13265.3	2.12359	1.08651	7.00387e-108	5.98453e-107	NC_006068.1	2095443	2097177	+	1677	YALI0_B15774g	GO:0000166;GO:0005524;GO:0005737;GO:0005832;GO:0006457;GO:0051082	K09493	-	YALI0B15774p [Yarrowia lipolytica CLIB122]	YALI0_B15774g	YALI0B15774g	2906924
gene6206	31454.5	20731.5	42177.6	2.03447	1.02466	8.62409e-108	7.35915e-107	NC_006072.1	1600855	1603417	-	2445	YALI0_F12155g	GO:0000166;GO:0005524;GO:0005634;GO:0005737;GO:0005829;GO:0016236;GO:0016787;GO:0016887;GO:0030433;GO:0030970;GO:0031593;GO:0034098;GO:0051228;GO:0071712;GO:0097352	K13525	-	YALI0F12155p [Yarrowia lipolytica CLIB122]	YALI0_F12155g	YALI0F12155g	2907958
gene6203	2751.53	389.414	5113.66	13.1317	3.71498	4.78996e-107	4.07655e-106	NC_006072.1	1591647	1596350	-	4629	YALI0_F12089g	GO:0000166;GO:0000324;GO:0005524;GO:0015127;GO:0015723;GO:0016020;GO:0016021;GO:0016887;GO:0042626;GO:0055085	-	-	YALI0F12089p [Yarrowia lipolytica CLIB122]	YALI0_F12089g	YALI0F12089g	2908192
gene3025	3614.04	2171.13	5056.95	2.32918	1.21982	8.51674e-107	7.22909e-106	NC_006070.1	308972	310369	+	1398	YALI0_D02563g	GO:0003824;GO:0007117;GO:0008152;GO:0008496;GO:0009272;GO:0016020;GO:0016021;GO:0016052;GO:0016787;GO:0016798	K08257	[EC:3.2.1.101]	YALI0D02563p [Yarrowia lipolytica CLIB122]	YALI0_D02563g	YALI0D02563g	2910532
gene1772	15472.6	7606.96	23338.3	3.06802	1.61731	1.82035e-106	1.54105e-105	NC_006068.1	2808908	2811557	+	2085	YALI0_B21428g	GO:0004360;GO:0006002;GO:0006047;GO:0006487;GO:0034221;GO:0097367;GO:1901135;GO:1901137	K00820	[EC:2.6.1.16]	YALI0B21428p [Yarrowia lipolytica CLIB122]	YALI0_B21428g	YALI0B21428g	2907464
gene695	7772.48	4613.93	10931	2.36914	1.24436	3.77961e-106	3.19549e-105	NC_006067.1	1858786	1860526	+	1398	YALI0_A17919g	GO:0009277	-	-	YALI0A17919p [Yarrowia lipolytica CLIB122]	YALI0_A17919g	YALI0A17919g	2906300
gene4656	56167.7	29188.3	83147.1	2.84864	1.51027	6.12428e-106	5.17099e-105	NC_006071.1	1541636	1543906	+	2271	YALI0_E12683g	GO:0003871;GO:0008270;GO:0008652;GO:0009086;GO:0032259	K00549	[EC:2.1.1.14]	YALI0E12683p [Yarrowia lipolytica CLIB122]	YALI0_E12683g	YALI0E12683g	2912845
gene5001	1010.66	180.416	1840.9	10.2037	3.35101	1.75282e-105	1.4761e-104	NC_006071.1	2450230	2451909	-	1680	YALI0_E20713g	GO:0003333;GO:0006865;GO:0015171;GO:0016020;GO:0016021;GO:0022857;GO:0055085	K16261	-	YALI0E20713p [Yarrowia lipolytica CLIB122]	YALI0_E20713g	YALI0E20713g	2911831
gene4163	339.46	88.9406	589.98	6.63341	2.72975	5.83602e-105	4.88263e-104	NC_006071.1	180821	181855	+	1035	YALI0_E01584g	GO:0016491;GO:0046872;GO:0051213;GO:0055114	-	-	YALI0E01584p [Yarrowia lipolytica CLIB122]	YALI0_E01584g	YALI0E01584g	2912044
gene3467	3545.61	1669.8	5421.43	3.24676	1.699	6.29703e-105	5.26146e-104	NC_006070.1	1545473	1546083	+	423	YALI0_D12408g	GO:0005094;GO:0005737;GO:0005829;GO:0007266;GO:0016020;GO:0048365;GO:0050790	K12462	-	YALI0D12408p [Yarrowia lipolytica CLIB122]	YALI0_D12408g	YALI0D12408g	2910138
gene3670	605.396	234.798	975.994	4.15675	2.05546	8.7098e-105	7.25854e-104	NC_006070.1	2142327	2142686	-	360	YALI0_D17380g	GO:0008794;GO:0055114	-	-	YALI0D17380p [Yarrowia lipolytica CLIB122]	YALI0_D17380g	YALI0D17380g	2911235
gene5150	4376.4	2479.6	6273.19	2.52992	1.33909	2.96277e-104	2.45952e-103	NC_006071.1	2842397	2843512	-	1116	YALI0_E23969g	GO:0016020;GO:0016021	-	-	YALI0E23969p [Yarrowia lipolytica CLIB122]	YALI0_E23969g	YALI0E23969g	2912692
gene6710	5286.64	3308.66	7264.63	2.19564	1.13464	6.04909e-104	5.00219e-103	NC_006072.1	3077792	3079840	-	2049	YALI0_F23485g	GO:0016020;GO:0016263;GO:0016267;GO:0016757	-	-	YALI0F23485p [Yarrowia lipolytica CLIB122]	YALI0_F23485g	YALI0F23485g	2908763
gene886	543.981	200.588	887.374	4.42387	2.14531	6.67323e-104	5.51122e-103	NC_006068.1	167700	168263	+	564	YALI0_B01012g	GO:0003713;GO:0005634;GO:0031490;GO:1903508	-	-	YALI0B01012p [Yarrowia lipolytica CLIB122]	YALI0_B01012g	YALI0B01012g	2907302
gene1087	518.383	186.339	850.428	4.56387	2.19026	1.21216e-103	9.97235e-103	NC_006068.1	781153	781659	-	507	YALI0_B05808g	GO:0006620;GO:0072380	-	-	YALI0B05808p [Yarrowia lipolytica CLIB122]	YALI0_B05808g	YALI0B05808g	2907207
gene5200	9178.3	5935.03	12421.6	2.09292	1.06552	5.50702e-103	4.52478e-102	NC_006071.1	2998566	2999327	-	762	YALI0_E25047g	GO:0016020;GO:0016021	-	-	YALI0E25047p [Yarrowia lipolytica CLIB122]	YALI0_E25047g	YALI0E25047g	2912675
gene4027	545.993	203.438	888.548	4.36765	2.12686	1.0755e-102	8.81417e-102	NC_006070.1	3430132	3431304	+	1173	YALI0_D25806g	GO:0005515	-	-	YALI0D25806p [Yarrowia lipolytica CLIB122]	YALI0_D25806g	YALI0D25806g	2910126
gene5611	2647.81	619.811	4675.81	7.54393	2.91532	1.5375e-102	1.25844e-101	NC_006071.1	4031855	4033621	+	1767	YALI0_E33913g	-	-	-	YALI0E33913p [Yarrowia lipolytica CLIB122]	YALI0_E33913g	YALI0E33913g	2911474
gene6657	1488.17	791.653	2184.69	2.75965	1.46449	2.24241e-102	1.83306e-101	NC_006072.1	2943754	2944659	+	906	YALI0_F22209g	-	-	-	YALI0F22209p [Yarrowia lipolytica CLIB122]	YALI0_F22209g	YALI0F22209g	2908823
gene2684	223.357	37.1867	409.527	11.0127	3.4611	4.81557e-102	3.92151e-101	NC_006069.1	2632008	2632436	-	429	YALI0_C19283g	GO:0016020;GO:0016021	-	-	YALI0C19283p [Yarrowia lipolytica CLIB122]	YALI0_C19283g	YALI0C19283g	2909955
gene99	1137.02	569.082	1704.96	2.99599	1.58303	2.73584e-101	2.21945e-100	NC_006067.1	308324	310612	-	2289	YALI0_A02453g	GO:0000166;GO:0000329;GO:0004430;GO:0005524;GO:0005768;GO:0005802;GO:0005886;GO:0007030;GO:0007032;GO:0016301;GO:0046854	K13711	[EC:2.7.1.67]	YALI0A02453p [Yarrowia lipolytica CLIB122]	YALI0_A02453g	YALI0A02453g	2906394
gene1824	2466.79	1440.3	3493.28	2.42537	1.27821	2.93327e-101	2.37661e-100	NC_006068.1	2968800	2969756	-	957	YALI0_B22550g	GO:0003824;GO:0004419;GO:0005829;GO:0006552;GO:0006629;GO:0046951	K01640	[EC:4.1.3.4]	YALI0B22550p [Yarrowia lipolytica CLIB122]	YALI0_B22550g	YALI0B22550g	2907421
gene2228	123.437	3.5691	243.305	68.1699	6.09106	5.11402e-101	4.13308e-100	NC_006069.1	1144534	1145373	-	840	YALI0_C08415g	-	-	-	YALI0C08415p [Yarrowia lipolytica CLIB122]	YALI0_C08415g	YALI0C08415g	2909325
gene845	2770.03	1644.94	3895.12	2.36794	1.24363	8.95185e-101	7.22566e-100	NC_006067.1	2296008	2297126	+	1119	YALI0_A21439g	GO:0000907;GO:0000908;GO:0005737;GO:0016491;GO:0044273;GO:0055114	-	-	YALI0A21439p [Yarrowia lipolytica CLIB122]	YALI0_A21439g	YALI0A21439g	2906426
gene6221	1005.09	366.616	1643.56	4.48306	2.16449	1.67022e-100	1.34477e-99	NC_006072.1	1671631	1672779	+	1149	YALI0_F12529g	GO:0005829;GO:0006152;GO:0008477	-	-	YALI0F12529p [Yarrowia lipolytica CLIB122]	YALI0_F12529g	YALI0F12529g	2908073
gene3288	4645.04	2664.02	6626.06	2.48724	1.31455	2.47125e-100	1.98225e-99	NC_006070.1	1099406	1101313	-	1908	YALI0_D08558g	GO:0004377;GO:0005783;GO:0005789;GO:0006486;GO:0006487;GO:0006490;GO:0016020;GO:0016021;GO:0016740;GO:0016757;GO:0097502	K03844	[EC:2.4.1.131]	YALI0D08558p [Yarrowia lipolytica CLIB122]	YALI0_D08558g	YALI0D08558g	2910710
gene3671	2556.38	1503.47	3609.29	2.40064	1.26342	2.51619e-100	2.01578e-99	NC_006070.1	2143388	2145037	-	1650	YALI0_D17402g	GO:0003824;GO:0003962;GO:0019346;GO:0030170	K01739	[EC:2.5.1.48]	YALI0D17402p [Yarrowia lipolytica CLIB122]	YALI0_D17402g	YALI0D17402g	2911236
gene852	2409.72	1409.85	3409.59	2.41841	1.27406	9.68529e-100	7.71098e-99	NC_006068.1	15486	16730	-	1245	YALI0_B00220g	GO:0004514;GO:0004516;GO:0005829;GO:0009435;GO:0016874;GO:0019357;GO:0019363;GO:0034355	K00763	[EC:6.3.4.21]	YALI0B00220p [Yarrowia lipolytica CLIB122]	YALI0_B00220g	YALI0B00220g	2907065
gene3004	1037.18	126.231	1948.13	15.433	3.94795	1.47263e-99	1.16809e-98	NC_006070.1	231548	232522	+	975	YALI0_D02046g	GO:0015174;GO:0016020;GO:0016021;GO:0034488;GO:0071627	-	-	YALI0D02046p [Yarrowia lipolytica CLIB122]	YALI0_D02046g	YALI0D02046g	2910485
gene3921	7096.34	4211.81	9980.87	2.36974	1.24473	1.59629e-99	1.26462e-98	NC_006070.1	3032298	3035205	+	2574	YALI0_D23309g	GO:0004177;GO:0005737;GO:0006508;GO:0008233;GO:0008237;GO:0008270;GO:0016787;GO:0042277;GO:0043171;GO:0046872;GO:0070006	-	-	YALI0D23309p [Yarrowia lipolytica CLIB122]	YALI0_D23309g	YALI0D23309g	2910273
gene6150	2069.22	1183.88	2954.57	2.49567	1.31943	2.27367e-99	1.7946e-98	NC_006072.1	1456459	1458081	-	1623	YALI0_F10923g	GO:0004856;GO:0005829;GO:0005975;GO:0005997;GO:0016310;GO:0016773;GO:0042732;GO:0046835	K00854	[EC:2.7.1.17]	YALI0F10923p [Yarrowia lipolytica CLIB122]	YALI0_F10923g	YALI0F10923g	2907802
gene916	522.022	194.729	849.314	4.36153	2.12483	4.1738e-99	3.29033e-98	NC_006068.1	263729	264403	+	675	YALI0_B01716g	GO:0008080;GO:0008999;GO:0017198;GO:1990189	-	-	YALI0B01716p [Yarrowia lipolytica CLIB122]	YALI0_B01716g	YALI0B01716g	2906905
gene2246	5252.38	3328.51	7176.26	2.156	1.10836	4.28669e-99	3.37518e-98	NC_006069.1	1192369	1193292	+	924	YALI0_C08811g	GO:0003857;GO:0006631;GO:0016491;GO:0055114;GO:0070403	K00074	[EC:1.1.1.157]	YALI0C08811p [Yarrowia lipolytica CLIB122]	YALI0_C08811g	YALI0C08811g	2910017
gene5831	875.384	254.582	1496.19	5.87704	2.55509	4.42382e-99	3.47888e-98	NC_006072.1	555185	557434	-	2250	YALI0_F03795g	GO:0005887;GO:0006855;GO:0016020;GO:0016021;GO:0055085	-	-	YALI0F03795p [Yarrowia lipolytica CLIB122]	YALI0_F03795g	YALI0F03795g	2907713
gene5261	20601.2	13203.2	27999.2	2.12064	1.0845	9.66726e-99	7.58372e-98	NC_006071.1	3141851	3142270	-	420	YALI0_E26455g	GO:0000786;GO:0003677;GO:0005634;GO:0005694;GO:0006334;GO:0046982	K11252	-	YALI0E26455p [Yarrowia lipolytica CLIB122]	YALI0_E26455g	YALI0E26455g	2912377
gene2177	432.938	44.1794	821.697	18.5991	4.21716	1.09337e-98	8.56674e-98	NC_006069.1	960499	962902	+	1623	YALI0_C07194g	GO:0016020;GO:0016021	-	-	YALI0C07194p [Yarrowia lipolytica CLIB122]	YALI0_C07194g	YALI0C07194g	2910046
gene3794	983.547	478.372	1488.72	3.11206	1.63787	2.96015e-98	2.31368e-97	NC_006070.1	2560492	2563839	+	3348	YALI0_D20240g	GO:0003677;GO:0003697;GO:0003824;GO:0004518;GO:0004519;GO:0005634;GO:0006281;GO:0006289;GO:0008821;GO:0016788;GO:0017108;GO:0048256;GO:0090305	K10846	-	YALI0D20240p [Yarrowia lipolytica CLIB122]	YALI0_D20240g	YALI0D20240g	2911203
gene4993	2866.87	1723.86	4009.87	2.3261	1.21791	4.23708e-98	3.3077e-97	NC_006071.1	2434352	2436313	+	1962	YALI0_E20537g	GO:0005515	K11684	-	YALI0E20537p [Yarrowia lipolytica CLIB122]	YALI0_E20537g	YALI0E20537g	2911820
gene2288	9419.04	2562.46	16275.6	6.35158	2.66711	4.77321e-98	3.71719e-97	NC_006069.1	1323203	1324750	-	1548	YALI0_C09680g	GO:0004553;GO:0005618;GO:0005975;GO:0006037;GO:0009277;GO:0016020;GO:0016757;GO:0016787;GO:0016798;GO:0031505;GO:0071555	-	-	YALI0C09680p [Yarrowia lipolytica CLIB122]	YALI0_C09680g	YALI0C09680g	2909790
gene2720	555.789	215.897	895.681	4.14865	2.05264	5.29164e-98	4.11095e-97	NC_006069.1	2713064	2713228	+	165	YALI0_C20066g	GO:0005507	-	-	YALI0C20066p [Yarrowia lipolytica CLIB122]	YALI0_C20066g	YALI0C20066g	7009471
gene4597	1803.79	1014.68	2592.89	2.55538	1.35354	8.3326e-98	6.46558e-97	NC_006071.1	1399046	1400389	+	1344	YALI0_E11451g	-	-	-	YALI0E11451p [Yarrowia lipolytica CLIB122]	YALI0_E11451g	YALI0E11451g	2912779
gene6706	4462.31	2806.16	6118.47	2.18037	1.12457	1.56574e-97	1.21199e-96	NC_006072.1	3063334	3065007	-	1674	YALI0_F23375g	GO:0003924;GO:0005047;GO:0005525;GO:0005785;GO:0005789;GO:0006605;GO:0006614;GO:0006886;GO:0016020;GO:0045047	K13431	-	YALI0F23375p [Yarrowia lipolytica CLIB122]	YALI0_F23375g	YALI0F23375g	2908962
gene5325	10095.7	4608.76	15582.6	3.38109	1.75749	1.67961e-97	1.29856e-96	NC_006071.1	3300475	3301197	+	723	YALI0_E27896g	GO:0008080	-	-	YALI0E27896p [Yarrowia lipolytica CLIB122]	YALI0_E27896g	YALI0E27896g	2912224
gene5025	439.824	150.73	728.917	4.83591	2.27379	3.6225e-97	2.78724e-96	NC_006071.1	2531576	2533483	+	1908	YALI0_E21241g	GO:0000329;GO:0005215;GO:0005887;GO:0006855;GO:0016020;GO:0016021;GO:0022857;GO:0055085	-	-	YALI0E21241p [Yarrowia lipolytica CLIB122]	YALI0_E21241g	YALI0E21241g	2911888
gene4298	2540.69	1509.92	3571.45	2.36533	1.24204	4.80438e-97	3.69218e-96	NC_006071.1	524863	525615	+	753	YALI0_E04598g	-	-	-	YALI0E04598p [Yarrowia lipolytica CLIB122]	YALI0_E04598g	YALI0E04598g	2912204
gene4	155.046	14.1047	295.987	20.985	4.39129	8.10356e-97	6.21273e-96	NC_006067.1	20087	20857	-	771	YALI0_A00198g	GO:0016020;GO:0016021	-	-	YALI0A00198p [Yarrowia lipolytica CLIB122]	YALI0_A00198g	YALI0A00198g	2906334
gene172	912.358	437.556	1387.16	3.17024	1.66459	2.07789e-96	1.58736e-95	NC_006067.1	470101	470730	-	630	YALI0_A04367g	GO:0000166;GO:0003924;GO:0005525;GO:0005886;GO:0006886;GO:0007264;GO:0015031;GO:0016020;GO:0032482	-	-	YALI0A04367p [Yarrowia lipolytica CLIB122]	YALI0_A04367g	YALI0A04367g	2906287
gene7005	2699.1	1625.33	3772.87	2.32129	1.21492	1.62423e-95	1.23638e-94	NC_006072.1	3791339	3792328	-	990	YALI0_F30349g	GO:0003877;GO:0004780;GO:0005524;GO:0008796;GO:0009117;GO:0009164;GO:0009165	K00988	-	YALI0F30349p [Yarrowia lipolytica CLIB122]	YALI0_F30349g	YALI0F30349g	2908556
gene5133	2762.99	930.12	4595.87	4.94115	2.30485	3.56615e-95	2.71137e-94	NC_006071.1	2788497	2790362	-	1866	YALI0_E23628g	GO:0003676;GO:0003723;GO:0005634;GO:0006397;GO:1990904	K13091	-	YALI0E23628p [Yarrowia lipolytica CLIB122]	YALI0_E23628g	YALI0E23628g	2912677
gene6893	2312.14	1367.68	3256.59	2.38111	1.25163	8.1678e-95	6.18805e-94	NC_006072.1	3497137	3498528	+	1392	YALI0_F27577g	GO:0001965;GO:0005085;GO:0005096;GO:0005737;GO:0007186;GO:0043547	-	-	YALI0F27577p [Yarrowia lipolytica CLIB122]	YALI0_F27577g	YALI0F27577g	2908705
gene2064	2264.4	756.273	3772.53	4.98832	2.31855	1.53205e-94	1.15661e-93	NC_006069.1	609248	611224	-	1977	YALI0_C04587g	GO:0004672;GO:0005524;GO:0006468	K08287	[EC:2.7.12.1]	YALI0C04587p [Yarrowia lipolytica CLIB122]	YALI0_C04587g	YALI0C04587g	2909653
gene2864	1723.3	802.025	2644.57	3.29737	1.72132	1.58482e-94	1.19504e-93	NC_006069.1	3117816	3119576	-	1761	YALI0_C23276g	GO:0005515	-	-	YALI0C23276p [Yarrowia lipolytica CLIB122]	YALI0_C23276g	YALI0C23276g	2909631
gene6120	834.792	393.319	1276.27	3.24486	1.69816	3.29001e-94	2.47503e-93	NC_006072.1	1379109	1379831	+	723	YALI0_F10175g	-	-	-	YALI0F10175p [Yarrowia lipolytica CLIB122]	YALI0_F10175g	YALI0F10175g	2909002
gene1140	1209.17	635.451	1782.9	2.80572	1.48837	6.55551e-94	4.92585e-93	NC_006068.1	937235	937949	-	666	YALI0_B07073g	GO:0000045;GO:0000407;GO:0006914	-	-	YALI0B07073p [Yarrowia lipolytica CLIB122]	YALI0_B07073g	YALI0B07073g	2907586
gene6742	5509.5	1891.56	9127.44	4.82536	2.27064	1.85886e-93	1.39349e-92	NC_006072.1	3158395	3159450	-	1056	YALI0_F24167g	-	K12772	-	YALI0F24167p [Yarrowia lipolytica CLIB122]	YALI0_F24167g	YALI0F24167g	2908726
gene4842	2218.13	1168.12	3268.15	2.79779	1.48429	2.30544e-93	1.72625e-92	NC_006071.1	2030281	2030802	+	522	YALI0_E17127g	GO:0016020;GO:0016021;GO:0016192	-	-	YALI0E17127p [Yarrowia lipolytica CLIB122]	YALI0_E17127g	YALI0E17127g	2911654
gene2639	446.598	50.8047	842.392	16.581	4.05146	5.24478e-93	3.91801e-92	NC_006069.1	2508684	2510776	+	1824	YALI0_C18263g	-	-	-	YALI0C18263p [Yarrowia lipolytica CLIB122]	YALI0_C18263g	YALI0C18263g	2909996
gene4830	1977.88	666.246	3289.51	4.93739	2.30375	1.06972e-92	7.98189e-92	NC_006071.1	1997895	1999829	+	1503	YALI0_E16841g	-	-	-	YALI0E16841p [Yarrowia lipolytica CLIB122]	YALI0_E16841g	YALI0E16841g	2911639
gene6211	6813.66	4469.57	9157.75	2.04891	1.03486	2.98598e-92	2.22029e-91	NC_006072.1	1625425	1626750	-	1326	YALI0_F12287g	-	-	-	YALI0F12287p [Yarrowia lipolytica CLIB122]	YALI0_F12287g	YALI0F12287g	2907950
gene2562	3665.83	2305.6	5026.06	2.17994	1.12429	6.75273e-92	5.00373e-91	NC_006069.1	2319026	2320063	-	1038	YALI0_C16412g	GO:0000149;GO:0005484;GO:0006886;GO:0006906;GO:0012505;GO:0016021;GO:0031201;GO:0035091;GO:0048278	K08502	-	YALI0C16412p [Yarrowia lipolytica CLIB122]	YALI0_C16412g	YALI0C16412g	2909746
gene5473	1458.65	288.234	2629.07	9.12131	3.18924	1.60987e-91	1.19015e-90	NC_006071.1	3666986	3667696	-	711	YALI0_E31108g	GO:0005199;GO:0005618	-	-	YALI0E31108p [Yarrowia lipolytica CLIB122]	YALI0_E31108g	YALI0E31108g	2911437
gene6294	2010.47	1178.25	2842.68	2.41262	1.2706	1.74712e-91	1.29014e-90	NC_006072.1	1910787	1911464	+	678	YALI0_F14201g	GO:0047429	K06287	-	YALI0F14201p [Yarrowia lipolytica CLIB122]	YALI0_F14201g	YALI0F14201g	2908580
gene1602	15864.9	7575.95	24153.8	3.18822	1.67275	3.95997e-91	2.91078e-90	NC_006068.1	2300028	2302006	-	1872	YALI0_B17622g	GO:0003779;GO:0005509;GO:0005515;GO:0005737;GO:0005884;GO:0032432;GO:0051015;GO:0051017;GO:0051639	K17275	-	YALI0B17622p [Yarrowia lipolytica CLIB122]	YALI0_B17622g	YALI0B17622g	2907230
gene6715	7322.24	3868.17	10776.3	2.7859	1.47814	1.71373e-90	1.24824e-89	NC_006072.1	3097578	3100436	-	2859	YALI0_F23595g	GO:0000166;GO:0004176;GO:0004252;GO:0005524;GO:0005777;GO:0005782;GO:0006508;GO:0006515;GO:0006625;GO:0008233;GO:0008236;GO:0016485;GO:0016558;GO:0016787;GO:0016887;GO:0030163	K01338	[EC:3.4.21.53]	YALI0F23595p [Yarrowia lipolytica CLIB122]	YALI0_F23595g	YALI0F23595g	2908759
gene4066	623.858	268.983	978.733	3.63865	1.8634	1.91675e-90	1.39453e-89	NC_006070.1	3551617	3553419	-	1803	YALI0_D26730g	GO:0006855;GO:0015297;GO:0016020;GO:0016021;GO:0022857;GO:0042908;GO:0042910;GO:0055085	K03327	-	YALI0D26730p [Yarrowia lipolytica CLIB122]	YALI0_D26730g	YALI0D26730g	2911174
gene3886	8419.14	3414.93	13423.3	3.93078	1.97482	7.06332e-90	5.1273e-89	NC_006070.1	2873107	2874552	+	1446	YALI0_D22484g	GO:0003824;GO:0004372;GO:0006544;GO:0006565;GO:0006730;GO:0008270;GO:0016597;GO:0016740;GO:0019264;GO:0030170;GO:0035999;GO:0046653;GO:0046655;GO:0050897;GO:0070905;GO:1904482	K00600	[EC:2.1.2.1]	YALI0D22484p [Yarrowia lipolytica CLIB122]	YALI0_D22484g	YALI0D22484g	2910775
gene1163	2188.69	874.656	3502.72	4.00468	2.00169	1.16635e-89	8.43795e-89	NC_006068.1	1021177	1022037	-	861	YALI0_B07601g	GO:0005886;GO:0016020;GO:0016021;GO:0031505;GO:0045121;GO:0051285	-	-	YALI0B07601p [Yarrowia lipolytica CLIB122]	YALI0_B07601g	YALI0B07601g	2906721
gene1204	3408.93	2145.09	4672.77	2.17836	1.12324	1.39736e-89	1.00978e-88	NC_006068.1	1193126	1194175	-	1050	YALI0_B08712g	GO:0005794;GO:0015165;GO:0015297;GO:0016020;GO:0016021;GO:0022857;GO:0055085;GO:0090481	-	-	YALI0B08712p [Yarrowia lipolytica CLIB122]	YALI0_B08712g	YALI0B08712g	2906788
gene4859	479.54	183.538	775.541	4.2255	2.07912	1.75349e-89	1.26571e-88	NC_006071.1	2064661	2065842	+	1182	YALI0_E17545g	GO:0003824;GO:0009058;GO:0030170	K00652	[EC:2.3.1.47]	YALI0E17545p [Yarrowia lipolytica CLIB122]	YALI0_E17545g	YALI0E17545g	2911674
gene5855	1188.54	633.952	1743.14	2.74963	1.45924	1.86154e-89	1.34219e-88	NC_006072.1	657756	658868	+	1113	YALI0_F04290g	GO:0004177;GO:0006508	-	-	YALI0F04290p [Yarrowia lipolytica CLIB122]	YALI0_F04290g	YALI0F04290g	2909024
gene2497	8873.82	5706.93	12040.7	2.10984	1.07713	3.81302e-89	2.74307e-88	NC_006069.1	2035391	2037331	+	1941	YALI0_C14806g	GO:0004174;GO:0009055;GO:0022900;GO:0022904;GO:0031305;GO:0048039;GO:0051539	K00311	[EC:1.5.5.1]	YALI0C14806p [Yarrowia lipolytica CLIB122]	YALI0_C14806g	YALI0C14806g	2909742
gene5754	22122.8	12600.8	31644.7	2.51132	1.32844	5.63038e-89	4.04141e-88	NC_006072.1	321273	321545	-	273	YALI0_F02046g	-	-	-	YALI0F02046p [Yarrowia lipolytica CLIB122]	YALI0_F02046g	YALI0F02046g	7009603
gene4783	8103.57	2617.17	13590	5.19263	2.37646	7.42972e-89	5.32698e-88	NC_006071.1	1880043	1882011	+	1644	YALI0_E15708g	GO:0003824;GO:0004474;GO:0005737;GO:0005782;GO:0006097;GO:0006099;GO:0016740	K01638	[EC:2.3.3.9]	YALI0E15708p [Yarrowia lipolytica CLIB122]	YALI0_E15708g	YALI0E15708g	2911562
gene6817	28555.7	16303.6	40807.7	2.50298	1.32365	8.34728e-89	5.97818e-88	NC_006072.1	3335365	3335784	+	420	YALI0_F25905g	GO:0000786;GO:0003677;GO:0005634;GO:0005694;GO:0009303;GO:0046982	K11253	-	YALI0F25905p [Yarrowia lipolytica CLIB122]	YALI0_F25905g	YALI0F25905g	2907691
gene4773	6533.45	4317.53	8749.37	2.02648	1.01897	8.98127e-89	6.42506e-88	NC_006071.1	1841513	1842952	+	1440	YALI0_E15488g	GO:0000166;GO:0001678;GO:0004340;GO:0004396;GO:0005524;GO:0005536;GO:0005829;GO:0005975;GO:0006096;GO:0008865;GO:0016301;GO:0016310;GO:0016740;GO:0016773;GO:0019158;GO:0046835;GO:0051156	K00844	[EC:2.7.1.1]	YALI0E15488p [Yarrowia lipolytica CLIB122]	YALI0_E15488g	YALI0E15488g	2912006
gene91	1093.08	413.892	1772.26	4.28194	2.09827	1.74125e-88	1.24428e-87	NC_006067.1	286025	288514	+	2490	YALI0_A02288g	GO:0016020;GO:0016021;GO:0055085	-	-	YALI0A02288p [Yarrowia lipolytica CLIB122]	YALI0_A02288g	YALI0A02288g	2906376
gene5588	552.13	228.88	875.38	3.82462	1.93532	2.52466e-88	1.80209e-87	NC_006071.1	3961726	3962934	-	1209	YALI0_E33407g	GO:0016787	-	-	YALI0E33407p [Yarrowia lipolytica CLIB122]	YALI0_E33407g	YALI0E33407g	2911985
gene3122	1452.01	813.59	2090.44	2.5694	1.36143	2.77068e-88	1.9755e-87	NC_006070.1	622859	623074	-	216	YALI0_D04884g	-	-	-	YALI0D04884p [Yarrowia lipolytica CLIB122]	YALI0_D04884g	YALI0D04884g	7009489
gene3898	3564.51	2176.07	4952.96	2.27611	1.18657	3.41933e-88	2.43528e-87	NC_006070.1	2944154	2947104	+	2607	YALI0_D22770g	GO:0000166;GO:0004672;GO:0004674;GO:0005524;GO:0005634;GO:0005737;GO:0005886;GO:0006468;GO:0016301;GO:0016310;GO:0016740;GO:0035556	K19852	[EC:2.7.11.1]	YALI0D22770p [Yarrowia lipolytica CLIB122]	YALI0_D22770g	YALI0D22770g	2910160
gene1064	2614.41	1607.14	3621.68	2.2535	1.17217	4.37918e-88	3.11543e-87	NC_006068.1	721233	723509	-	2277	YALI0_B05258g	GO:0004180;GO:0006508;GO:0016020;GO:0016021	K01301	[EC:3.4.17.21]	YALI0B05258p [Yarrowia lipolytica CLIB122]	YALI0_B05258g	YALI0B05258g	2907559
gene6963	12086.5	7206.58	16966.5	2.35431	1.2353	5.03149e-88	3.57158e-87	NC_006072.1	3697136	3698630	+	1296	YALI0_F29337g	GO:0003824;GO:0004069;GO:0005829;GO:0006520;GO:0006532;GO:0008483;GO:0009058;GO:0016740;GO:0030170	K14454	[EC:2.6.1.1]	YALI0F29337p [Yarrowia lipolytica CLIB122]	YALI0_F29337g	YALI0F29337g	2908742
gene6472	6459.09	4275.8	8642.38	2.02123	1.01523	5.13835e-88	3.6434e-87	NC_006072.1	2411373	2413562	-	2091	YALI0_F18106g	GO:0005096;GO:0005623;GO:0006886;GO:0017137;GO:0043087;GO:0090630	-	-	YALI0F18106p [Yarrowia lipolytica CLIB122]	YALI0_F18106g	YALI0F18106g	2908665
gene4070	5317.44	2976.49	7658.39	2.57296	1.36343	1.99698e-87	1.40975e-86	NC_006070.1	3570674	3572587	+	1914	YALI0_D26818g	GO:0005384;GO:0005886;GO:0006826;GO:0015086;GO:0016020;GO:0016021;GO:0030001;GO:0030026;GO:0046873;GO:0070574;GO:0071421	K12346	-	YALI0D26818p [Yarrowia lipolytica CLIB122]	YALI0_D26818g	YALI0D26818g	2911176
gene5903	1740.4	785.665	2695.14	3.4304	1.77838	2.02897e-87	1.43076e-86	NC_006072.1	807522	808787	+	1266	YALI0_F05390g	GO:0004338;GO:0004553;GO:0005576;GO:0005975;GO:0006073;GO:0008152;GO:0016787;GO:0016798;GO:0071555	K01210	[EC:3.2.1.58]	YALI0F05390p [Yarrowia lipolytica CLIB122]	YALI0_F05390g	YALI0F05390g	2908269
gene1153	4716.13	3068.49	6363.76	2.07391	1.05235	2.09216e-87	1.4737e-86	NC_006068.1	958634	959494	-	861	YALI0_B07359g	GO:0006107;GO:0006528;GO:0006541;GO:0006807;GO:0050152	K13566	[EC:3.5.1.3]	YALI0B07359p [Yarrowia lipolytica CLIB122]	YALI0_B07359g	YALI0B07359g	2907167
gene4276	4385.84	1557.98	7213.71	4.63017	2.21107	2.58318e-87	1.81558e-86	NC_006071.1	455192	457441	-	2250	YALI0_E04114g	GO:0006511;GO:0046872;GO:1990304	-	-	YALI0E04114p [Yarrowia lipolytica CLIB122]	YALI0_E04114g	YALI0E04114g	2912180
gene4183	28133.8	8367.69	47899.9	5.72439	2.51712	2.69492e-87	1.89205e-86	NC_006071.1	212727	216101	+	3375	YALI0_E02024g	-	-	-	YALI0E02024p [Yarrowia lipolytica CLIB122]	YALI0_E02024g	YALI0E02024g	2912077
gene753	1446.32	818.566	2074.08	2.53379	1.3413	9.69358e-86	6.75393e-85	NC_006067.1	2066070	2067772	-	1272	YALI0_A19206g	GO:0003723;GO:0004349;GO:0005737;GO:0005829;GO:0006561;GO:0016310	K00931	[EC:2.7.2.11]	YALI0A19206p [Yarrowia lipolytica CLIB122]	YALI0_A19206g	YALI0A19206g	2906058
gene6794	402.704	144.129	661.278	4.5881	2.1979	1.14204e-85	7.93985e-85	NC_006072.1	3266500	3267163	-	393	YALI0_F25399g	GO:0003735;GO:0005840;GO:0006412;GO:0022627	K02957	-	40S ribosomal protein S22 [Yarrowia lipolytica CLIB122]	YALI0_F25399g	YALI0F25399g	2908988
gene3062	2901.39	1160.08	4642.71	4.00206	2.00074	1.24265e-85	8.62998e-85	NC_006070.1	439518	443632	-	3573	YALI0_D03480g	GO:0000139;GO:0004609;GO:0005768;GO:0005794;GO:0005795;GO:0006629;GO:0006646;GO:0008654;GO:0010008;GO:0016020;GO:0016540;GO:0016829;GO:0016831	K01613	[EC:4.1.1.65]	YALI0D03480p [Yarrowia lipolytica CLIB122]	YALI0_D03480g	YALI0D03480g	2910575
gene2729	1370.96	291.325	2450.59	8.41186	3.07242	2.54207e-85	1.7597e-84	NC_006069.1	2740103	2744739	+	4410	YALI0_C20265g	GO:0000166;GO:0005524;GO:0005886;GO:0016020;GO:0016021;GO:0016887;GO:0042626;GO:0055085	-	-	YALI0C20265p [Yarrowia lipolytica CLIB122]	YALI0_C20265g	YALI0C20265g	2909904
gene2042	2842.91	1781.03	3904.79	2.19243	1.13253	2.59222e-85	1.79056e-84	NC_006069.1	538442	539143	-	702	YALI0_C04092g	GO:0005778;GO:0005779;GO:0016020;GO:0016021;GO:0016559;GO:0044375	-	-	YALI0C04092p [Yarrowia lipolytica CLIB122]	YALI0_C04092g	YALI0C04092g	2909682
gene3255	926.831	473.661	1380	2.91348	1.54274	3.71951e-85	2.5637e-84	NC_006070.1	1004193	1006535	-	2343	YALI0_D07810g	GO:0005623;GO:1903474	-	-	YALI0D07810p [Yarrowia lipolytica CLIB122]	YALI0_D07810g	YALI0D07810g	2910941
gene4161	2453.16	1397.75	3508.57	2.51015	1.32777	4.28758e-85	2.94892e-84	NC_006071.1	176245	176682	-	438	YALI0_E01540g	-	-	-	YALI0E01540p [Yarrowia lipolytica CLIB122]	YALI0_E01540g	YALI0E01540g	2912042
gene5622	4065.11	2634.36	5495.86	2.08622	1.06089	4.67304e-85	3.21059e-84	NC_006071.1	4056932	4058965	+	2034	YALI0_E34155g	GO:0005576;GO:0006073;GO:0046557	-	-	YALI0E34155p [Yarrowia lipolytica CLIB122]	YALI0_E34155g	YALI0E34155g	2911952
gene2929	3352.12	2136.51	4567.72	2.13794	1.09622	5.09002e-85	3.49333e-84	NC_006070.1	32523	34340	+	1818	YALI0_D00319g	GO:0005886;GO:0010961;GO:0015095;GO:0016020;GO:0016021;GO:0030001;GO:0046873;GO:0055085;GO:1903830	K16073	-	YALI0D00319p [Yarrowia lipolytica CLIB122]	YALI0_D00319g	YALI0D00319g	2910384
gene4345	4866.55	3196.84	6536.25	2.04459	1.03181	7.28399e-85	4.98841e-84	NC_006071.1	628082	628957	+	876	YALI0_E05643g	GO:0016491;GO:0016616;GO:0055114	-	-	YALI0E05643p [Yarrowia lipolytica CLIB122]	YALI0_E05643g	YALI0E05643g	2912324
gene2217	1085.75	579.563	1591.95	2.74681	1.45776	8.85309e-85	6.04365e-84	NC_006069.1	1088176	1089252	+	1077	YALI0_C08140g	-	-	-	YALI0C08140p [Yarrowia lipolytica CLIB122]	YALI0_C08140g	YALI0C08140g	2909484
gene1073	3239.15	2061.21	4417.09	2.14296	1.0996	1.46729e-84	9.99533e-84	NC_006068.1	745387	746442	-	1056	YALI0_B05478g	GO:0003676;GO:0003700;GO:0005634;GO:0006355	-	-	YALI0B05478p [Yarrowia lipolytica CLIB122]	YALI0_B05478g	YALI0B05478g	2907318
gene6875	2806.9	1762.68	3851.12	2.18481	1.12751	3.5797e-84	2.43336e-83	NC_006072.1	3452427	3453233	-	624	YALI0_F27181g	GO:0003924;GO:0005525;GO:0005768;GO:0005769;GO:0006886;GO:0030139;GO:0032482	K07889	-	YALI0F27181p [Yarrowia lipolytica CLIB122]	YALI0_F27181g	YALI0F27181g	2908009
gene4278	857.281	430.587	1283.98	2.98192	1.57624	2.25706e-83	1.53103e-82	NC_006071.1	466913	469097	+	2133	YALI0_E04158g	GO:0000166;GO:0000287;GO:0004012;GO:0005524;GO:0005886;GO:0015914;GO:0016020;GO:0016021;GO:0045332;GO:0140326	-	-	YALI0E04158p [Yarrowia lipolytica CLIB122]	YALI0_E04158g	YALI0E04158g	2912182
gene1392	593.433	151.43	1035.44	6.83772	2.77352	2.92726e-83	1.97937e-82	NC_006068.1	1738171	1742671	+	4419	YALI0_B12980g	GO:0000166;GO:0005524;GO:0005886;GO:0016020;GO:0016021;GO:0016887;GO:0042626;GO:0055085	-	-	YALI0B12980p [Yarrowia lipolytica CLIB122]	YALI0_B12980g	YALI0B12980g	2906860
gene5511	531.613	193.885	869.341	4.4838	2.16472	3.44511e-83	2.32463e-82	NC_006071.1	3784047	3785084	-	1038	YALI0_E31823g	GO:0000124;GO:0006357;GO:0030958;GO:0031048;GO:1904802	K11365	-	YALI0E31823p [Yarrowia lipolytica CLIB122]	YALI0_E31823g	YALI0E31823g	2911828
gene6202	8535.95	4348.93	12723	2.92554	1.5487	6.08118e-83	4.09474e-82	NC_006072.1	1589247	1590245	-	999	YALI0_F12067g	-	-	-	YALI0F12067p [Yarrowia lipolytica CLIB122]	YALI0_F12067g	YALI0F12067g	2908191
gene1745	2250.4	1382.03	3118.77	2.25666	1.17419	7.37948e-83	4.96374e-82	NC_006068.1	2749453	2750394	+	894	YALI0_B20878g	GO:0000139;GO:0004175;GO:0004252;GO:0005794;GO:0006508;GO:0008233;GO:0008236;GO:0016020;GO:0016021;GO:0016787	-	-	YALI0B20878p [Yarrowia lipolytica CLIB122]	YALI0_B20878g	YALI0B20878g	2907094
gene5823	184.746	21.5544	347.938	16.1423	4.01278	1.62238e-82	1.089e-81	NC_006072.1	523884	525353	-	1470	YALI0_F03619g	-	-	-	YALI0F03619p [Yarrowia lipolytica CLIB122]	YALI0_F03619g	YALI0F03619g	2907734
gene5937	2740.5	485.332	4995.67	10.2933	3.36363	3.43504e-82	2.2985e-81	NC_006072.1	907737	909581	-	1845	YALI0_F06094g	GO:0005515;GO:0008360;GO:0051285	-	-	YALI0F06094p [Yarrowia lipolytica CLIB122]	YALI0_F06094g	YALI0F06094g	2908446
gene2197	114.663	7.19052	222.136	30.8929	4.9492	1.34682e-81	8.96532e-81	NC_006069.1	1012355	1012615	+	261	YALI0_C07634g	-	-	-	YALI0C07634p [Yarrowia lipolytica CLIB122]	YALI0_C07634g	YALI0C07634g	2910035
gene3021	153.741	20.8928	286.589	13.7171	3.7779	2.7783e-81	1.83608e-80	NC_006070.1	293954	294313	-	360	YALI0_D02453g	-	-	-	YALI0D02453p [Yarrowia lipolytica CLIB122]	YALI0_D02453g	YALI0D02453g	2910528
gene6765	2976.86	1899.88	4053.83	2.13373	1.09337	3.58482e-81	2.36422e-80	NC_006072.1	3207583	3208575	+	993	YALI0_F24717g	GO:0003676;GO:0003723;GO:0003729;GO:0005634;GO:0005737;GO:0016973;GO:0071014;GO:0071028;GO:1990904;GO:2000815	-	-	YALI0F24717p [Yarrowia lipolytica CLIB122]	YALI0_F24717g	YALI0F24717g	2908422
gene3594	2082	1274.64	2889.36	2.26681	1.18067	7.14139e-81	4.70014e-80	NC_006070.1	1901372	1902166	+	795	YALI0_D15510g	GO:0046872	-	-	YALI0D15510p [Yarrowia lipolytica CLIB122]	YALI0_D15510g	YALI0D15510g	2910166
gene3777	637.092	295.283	978.902	3.31513	1.72907	1.73565e-80	1.13882e-79	NC_006070.1	2512692	2514206	+	1515	YALI0_D19866g	GO:0016020;GO:0016021;GO:0022857;GO:0055085	-	-	YALI0D19866p [Yarrowia lipolytica CLIB122]	YALI0_D19866g	YALI0D19866g	2911187
gene4599	2258.27	1400.24	3116.3	2.22555	1.15416	1.96187e-80	1.28462e-79	NC_006071.1	1404519	1407128	-	2610	YALI0_E11495g	GO:0003876;GO:0005829;GO:0006188;GO:0009168;GO:0019239;GO:0032264;GO:0046033	K01490	[EC:3.5.4.6]	YALI0E11495p [Yarrowia lipolytica CLIB122]	YALI0_E11495g	YALI0E11495g	2912781
gene2888	463.103	186.887	739.32	3.95598	1.98403	2.40616e-80	1.57234e-79	NC_006069.1	3191299	3191907	+	609	YALI0_C23815g	GO:0005737;GO:0005739;GO:0005743;GO:0016020;GO:0016021	K13348	-	YALI0C23815p [Yarrowia lipolytica CLIB122]	YALI0_C23815g	YALI0C23815g	2909597
gene5160	8302.77	1939.98	14665.6	7.55963	2.91832	3.54978e-80	2.31024e-79	NC_006071.1	2871121	2872407	-	1287	YALI0_E24167g	GO:0000316;GO:0000319;GO:0005886;GO:0016020;GO:0016021;GO:0055085	-	-	YALI0E24167p [Yarrowia lipolytica CLIB122]	YALI0_E24167g	YALI0E24167g	2912540
gene1175	780.124	145.96	1414.29	9.68952	3.27643	1.07591e-79	6.95281e-79	NC_006068.1	1068905	1070401	-	1497	YALI0_B08030g	GO:0004806;GO:0006629;GO:0016042;GO:0016787	-	-	YALI0B08030p [Yarrowia lipolytica CLIB122]	YALI0_B08030g	YALI0B08030g	2907630
gene4289	2491.03	1405.52	3576.54	2.54464	1.34746	7.96907e-79	5.09846e-78	NC_006071.1	499399	501432	+	2034	YALI0_E04400g	GO:0005886;GO:0016020	-	-	YALI0E04400p [Yarrowia lipolytica CLIB122]	YALI0_E04400g	YALI0E04400g	2911795
gene5925	1801.42	1090.03	2512.8	2.30527	1.20493	1.2237e-78	7.80562e-78	NC_006072.1	866513	868249	-	1737	YALI0_F05852g	GO:0004679;GO:0005634;GO:0005737;GO:0006468;GO:0019901;GO:0031588	-	-	YALI0F05852p [Yarrowia lipolytica CLIB122]	YALI0_F05852g	YALI0F05852g	2908467
gene4236	756.499	376.63	1136.37	3.0172	1.59321	1.63655e-78	1.04288e-77	NC_006071.1	349874	351610	-	1737	YALI0_E03212g	GO:0003824;GO:0004458;GO:0005739;GO:0008720;GO:0016491;GO:0050660;GO:0055114;GO:0071949;GO:1903457	K00102	[EC:1.1.2.4]	YALI0E03212p [Yarrowia lipolytica CLIB122]	YALI0_E03212g	YALI0E03212g	2912134
gene3790	2391.24	1411.4	3371.07	2.38846	1.25608	1.74805e-78	1.11282e-77	NC_006070.1	2539207	2539722	-	516	YALI0_D20152g	GO:0004343;GO:0005783;GO:0005793;GO:0005794;GO:0006048;GO:0008080;GO:0016740;GO:0016746;GO:0048029	K00621	[EC:2.3.1.4]	YALI0D20152p [Yarrowia lipolytica CLIB122]	YALI0_D20152g	YALI0D20152g	2911199
gene3347	1442.38	672.585	2212.18	3.28907	1.71768	2.39517e-78	1.52327e-77	NC_006070.1	1244431	1246590	+	2160	YALI0_D09823g	GO:0005515;GO:0007049;GO:0051301;GO:0071555	-	-	YALI0D09823p [Yarrowia lipolytica CLIB122]	YALI0_D09823g	YALI0D09823g	2910923
gene3303	4047.72	2680.14	5415.3	2.02053	1.01474	5.46795e-78	3.47061e-77	NC_006070.1	1133041	1134036	-	996	YALI0_D08844g	GO:0003824;GO:0016491;GO:0016616;GO:0050662;GO:0055114	-	-	YALI0D08844p [Yarrowia lipolytica CLIB122]	YALI0_D08844g	YALI0D08844g	2910677
gene3807	1471.93	709.87	2233.99	3.14703	1.65399	1.44708e-77	9.17581e-77	NC_006070.1	2607998	2609338	+	1341	YALI0_D20548g	-	-	-	YALI0D20548p [Yarrowia lipolytica CLIB122]	YALI0_D20548g	YALI0D20548g	2910778
gene2973	1515	898.942	2131.05	2.37063	1.24527	1.64725e-76	1.03428e-75	NC_006070.1	146433	147209	-	777	YALI0_D01287g	GO:0016020;GO:0016021	-	-	YALI0D01287p [Yarrowia lipolytica CLIB122]	YALI0_D01287g	YALI0D01287g	2910452
gene3195	2575.31	1053.08	4097.54	3.89102	1.96015	1.67447e-76	1.05035e-75	NC_006070.1	832977	833729	-	753	YALI0_D06501g	GO:0008703;GO:0009231;GO:0055114	K14654	[EC:1.1.1.302]	YALI0D06501p [Yarrowia lipolytica CLIB122]	YALI0_D06501g	YALI0D06501g	2910491
gene1773	4833.7	1769.06	7898.34	4.4647	2.15856	2.63703e-76	1.64769e-75	NC_006068.1	2813894	2814337	-	444	YALI0_B21450g	-	-	-	YALI0B21450p [Yarrowia lipolytica CLIB122]	YALI0_B21450g	YALI0B21450g	2907465
gene3858	503.582	218.311	788.852	3.61343	1.85337	3.84707e-76	2.39909e-75	NC_006070.1	2763590	2767999	-	3849	YALI0_D21802g	-	-	-	YALI0D21802p [Yarrowia lipolytica CLIB122]	YALI0_D21802g	YALI0D21802g	2910694
gene7011	4590.15	2062.75	7117.55	3.45052	1.78681	6.5848e-76	4.09445e-75	NC_006072.1	3807419	3809527	-	2109	YALI0_F30459g	-	-	-	YALI0F30459p [Yarrowia lipolytica CLIB122]	YALI0_F30459g	YALI0F30459g	2907919
gene3153	743.688	374.397	1112.98	2.97272	1.57178	1.00348e-75	6.21556e-75	NC_006070.1	716029	717871	+	1020	YALI0_D05547g	GO:0003676;GO:0003723	K14651	-	YALI0D05547p [Yarrowia lipolytica CLIB122]	YALI0_D05547g	YALI0D05547g	2911029
gene3209	969.237	484.142	1454.33	3.00393	1.58685	1.04867e-75	6.48924e-75	NC_006070.1	873159	874109	+	951	YALI0_D06798g	GO:0000064;GO:0016020;GO:0016021;GO:0022857;GO:0055085;GO:1990575	K15114	-	YALI0D06798p [Yarrowia lipolytica CLIB122]	YALI0_D06798g	YALI0D06798g	2910505
gene5004	5038.29	3304.85	6771.73	2.04903	1.03494	1.70011e-75	1.049e-74	NC_006071.1	2462889	2463221	-	333	YALI0_E20779g	GO:0016020;GO:0016021	-	-	YALI0E20779p [Yarrowia lipolytica CLIB122]	YALI0_E20779g	YALI0E20779g	2911834
gene3370	1866.91	914.409	2819.4	3.08331	1.62448	2.04748e-75	1.26212e-74	NC_006070.1	1296113	1298569	+	2457	YALI0_D10285g	GO:0000977;GO:0000981;GO:0003676;GO:0003700;GO:0005634;GO:0006355;GO:0006357;GO:0008270	K12236	-	YALI0D10285p [Yarrowia lipolytica CLIB122]	YALI0_D10285g	YALI0D10285g	2911003
gene3091	1032.89	570.524	1495.26	2.62085	1.39003	3.51078e-75	2.15174e-74	NC_006070.1	524215	525168	+	954	YALI0_D04180g	-	-	-	YALI0D04180p [Yarrowia lipolytica CLIB122]	YALI0_D04180g	YALI0D04180g	2910628
gene5162	1161.37	658.852	1663.89	2.52544	1.33653	4.25564e-75	2.60577e-74	NC_006071.1	2877313	2879295	+	1983	YALI0_E24211g	GO:0005216;GO:0005262;GO:0005887;GO:0006811;GO:0016020;GO:0016021;GO:0034220;GO:0070588	-	-	YALI0E24211p [Yarrowia lipolytica CLIB122]	YALI0_E24211g	YALI0E24211g	2912539
gene4437	1953.81	1044	2863.61	2.74291	1.45571	6.25745e-75	3.82784e-74	NC_006071.1	918463	919701	-	1239	YALI0_E07898g	GO:0000079;GO:0019901	-	-	YALI0E07898p [Yarrowia lipolytica CLIB122]	YALI0_E07898g	YALI0E07898g	2912464
gene5	239.747	65.6537	413.84	6.30338	2.65612	8.5971e-75	5.25406e-74	NC_006067.1	21944	23305	+	1023	YALI0_A00212g	GO:0005515	-	-	YALI0A00212p [Yarrowia lipolytica CLIB122]	YALI0_A00212g	YALI0A00212g	2905847
gene1653	943.343	511.585	1375.1	2.68792	1.42649	1.75756e-74	1.07005e-73	NC_006068.1	2455741	2456598	-	858	YALI0_B18744g	-	-	-	YALI0B18744p [Yarrowia lipolytica CLIB122]	YALI0_B18744g	YALI0B18744g	2907023
gene2962	3652.41	2426.64	4878.18	2.01027	1.00739	1.97504e-74	1.20017e-73	NC_006070.1	109397	110011	+	615	YALI0_D01045g	GO:0000166;GO:0003924;GO:0005525;GO:0005622;GO:0005737;GO:0005886;GO:0005938;GO:0007015;GO:0007264;GO:0007266;GO:0008360;GO:0019901;GO:0030334;GO:0030950;GO:0032153;GO:0032956;GO:0043231;GO:0051017	K07975	-	YALI0D01045p [Yarrowia lipolytica CLIB122]	YALI0_D01045g	YALI0D01045g	2910309
gene5367	631.778	303.474	960.082	3.16364	1.66159	2.07763e-74	1.26013e-73	NC_006071.1	3417493	3419643	+	2151	YALI0_E28809g	-	-	-	YALI0E28809p [Yarrowia lipolytica CLIB122]	YALI0_E28809g	YALI0E28809g	2911864
gene5029	563.551	260.066	867.036	3.33391	1.73722	3.17503e-74	1.92391e-73	NC_006071.1	2538766	2539518	-	753	YALI0_E21351g	GO:0000166;GO:0004788;GO:0005524;GO:0006772;GO:0009229;GO:0016301;GO:0016310;GO:0016740;GO:0030975	K00949	[EC:2.7.6.2]	YALI0E21351p [Yarrowia lipolytica CLIB122]	YALI0_E21351g	YALI0E21351g	2911892
gene3960	3470.57	1965.94	4975.21	2.5307	1.33953	4.06141e-74	2.45175e-73	NC_006070.1	3183316	3184278	+	963	YALI0_D24167g	GO:0046983	K22484	-	YALI0D24167p [Yarrowia lipolytica CLIB122]	YALI0_D24167g	YALI0D24167g	2911017
gene1199	245.115	69.3167	420.914	6.07233	2.60225	6.0379e-74	3.63805e-73	NC_006068.1	1183476	1184726	+	1251	YALI0_B08558g	GO:0000166;GO:0004672;GO:0004674;GO:0005524;GO:0005634;GO:0005737;GO:0006468;GO:0035556	-	-	YALI0B08558p [Yarrowia lipolytica CLIB122]	YALI0_B08558g	YALI0B08558g	2907245
gene5598	911.795	346.99	1476.6	4.25545	2.08931	1.43374e-73	8.5904e-73	NC_006071.1	3994480	3996654	+	2175	YALI0_E33627g	GO:0005886	-	-	YALI0E33627p [Yarrowia lipolytica CLIB122]	YALI0_E33627g	YALI0E33627g	2911587
gene4764	2777.2	1807.14	3747.25	2.07358	1.05213	1.55841e-73	9.32863e-73	NC_006071.1	1815296	1815979	-	684	YALI0_E15246g	GO:0005515	-	-	YALI0E15246p [Yarrowia lipolytica CLIB122]	YALI0_E15246g	YALI0E15246g	2911993
gene2580	2485.85	1602.93	3368.77	2.10164	1.07151	1.00983e-72	5.98896e-72	NC_006069.1	2368456	2369376	+	921	YALI0_C16819g	GO:0000139;GO:0000149;GO:0005484;GO:0006886;GO:0006888;GO:0006906;GO:0012505;GO:0016020;GO:0016021;GO:0016192;GO:0031201;GO:0048278	K08490	-	YALI0C16819p [Yarrowia lipolytica CLIB122]	YALI0_C16819g	YALI0C16819g	2909299
gene4639	2171.26	1133.44	3209.09	2.83128	1.50146	5.89409e-72	3.45726e-71	NC_006071.1	1501304	1502821	+	1518	YALI0_E12331g	-	-	-	YALI0E12331p [Yarrowia lipolytica CLIB122]	YALI0_E12331g	YALI0E12331g	2912823
gene3116	2784.98	1365.49	4204.47	3.0791	1.62251	1.96169e-71	1.14646e-70	NC_006070.1	593632	595443	-	1812	YALI0_D04785g	GO:0000978;GO:0003677;GO:0003700;GO:0005634;GO:0006355;GO:0034605;GO:0043565;GO:0061408	-	-	YALI0D04785p [Yarrowia lipolytica CLIB122]	YALI0_D04785g	YALI0D04785g	2910654
gene4189	662.779	171.456	1154.1	6.73118	2.75086	2.05401e-71	1.19932e-70	NC_006071.1	230799	232346	-	1548	YALI0_E02156g	GO:0005886;GO:0006812;GO:0015299;GO:0015385;GO:0016020;GO:0016021;GO:0030007;GO:0035725;GO:0055085;GO:1902600	-	-	YALI0E02156p [Yarrowia lipolytica CLIB122]	YALI0_E02156g	YALI0E02156g	2912083
gene5148	1353.91	752.987	1954.84	2.59611	1.37635	5.8496e-71	3.40316e-70	NC_006071.1	2837282	2838349	+	1068	YALI0_E23925g	-	-	-	YALI0E23925p [Yarrowia lipolytica CLIB122]	YALI0_E23925g	YALI0E23925g	2912690
gene6816	12094.3	4902.88	19285.7	3.93354	1.97583	6.64669e-71	3.85989e-70	NC_006072.1	3333682	3333993	-	312	YALI0_F25883g	GO:0000786;GO:0003677;GO:0005634;GO:0005694;GO:0006334;GO:0006352;GO:0046982	K11254	-	YALI0F25883p [Yarrowia lipolytica CLIB122]	YALI0_F25883g	YALI0F25883g	2908704
gene5852	2785.91	1328.45	4243.38	3.19423	1.67547	1.40657e-70	8.12419e-70	NC_006072.1	646551	647936	+	1386	YALI0_F04213g	GO:0016020;GO:0016021	-	-	YALI0F04213p [Yarrowia lipolytica CLIB122]	YALI0_F04213g	YALI0F04213g	2907927
gene1977	2416.3	760.24	4072.36	5.35668	2.42134	2.31506e-70	1.33116e-69	NC_006069.1	367990	369660	+	1671	YALI0_C02629g	GO:0003677	-	-	YALI0C02629p [Yarrowia lipolytica CLIB122]	YALI0_C02629g	YALI0C02629g	2909092
gene2824	9511.26	5845.3	13177.2	2.25433	1.1727	2.4168e-70	1.38841e-69	NC_006069.1	2989405	2989587	-	183	YALI0_C22394g	-	-	-	YALI0C22394p [Yarrowia lipolytica CLIB122]	YALI0_C22394g	YALI0C22394g	7009476
gene5962	5368.8	2889.01	7848.58	2.7167	1.44186	9.28199e-70	5.29916e-69	NC_006072.1	974607	976238	+	1632	YALI0_F06578g	GO:0005783;GO:0005789;GO:0008204;GO:0008374;GO:0016020;GO:0016021;GO:0016740;GO:0016746;GO:0034737	K00637	[EC:2.3.1.26]	YALI0F06578p [Yarrowia lipolytica CLIB122]	YALI0_F06578g	YALI0F06578g	2908079
gene2070	498.739	226.347	771.131	3.40685	1.76844	1.5073e-69	8.59764e-69	NC_006069.1	625342	627255	-	1128	YALI0_C04774g	GO:0000166;GO:0000915;GO:0000917;GO:0003924;GO:0005525;GO:0005940;GO:0015630;GO:0031105;GO:0032186;GO:0061640;GO:0097271	K16945	-	YALI0C04774p [Yarrowia lipolytica CLIB122]	YALI0_C04774g	YALI0C04774g	2909541
gene4532	465.989	205.713	726.266	3.53048	1.81987	1.66939e-69	9.51373e-69	NC_006071.1	1231405	1233510	-	2106	YALI0_E10021g	GO:0000506;GO:0006506;GO:0016020;GO:0016021;GO:0017176	K03860	-	YALI0E10021p [Yarrowia lipolytica CLIB122]	YALI0_E10021g	YALI0E10021g	2912581
gene193	859.718	444.797	1274.64	2.86566	1.51887	2.1114e-69	1.20114e-68	NC_006067.1	509325	510677	-	1353	YALI0_A04873g	-	-	-	YALI0A04873p [Yarrowia lipolytica CLIB122]	YALI0_A04873g	YALI0A04873g	2905902
gene2294	2960.79	1967.1	3954.48	2.01031	1.00742	2.48957e-69	1.41502e-68	NC_006069.1	1351600	1351944	-	345	YALI0_C09845g	-	-	-	YALI0C09845p [Yarrowia lipolytica CLIB122]	YALI0_C09845g	YALI0C09845g	2909446
gene2591	222.164	61.3013	383.026	6.24825	2.64345	2.89676e-69	1.645e-68	NC_006069.1	2412984	2414786	+	1803	YALI0_C17061g	GO:0003950;GO:0005634;GO:0005730;GO:0006302;GO:0016740;GO:0016757;GO:0070212;GO:1990404	K10798	[EC:2.4.2.30]	YALI0C17061p [Yarrowia lipolytica CLIB122]	YALI0_C17061g	YALI0C17061g	2910083
gene4135	6075.8	2376.96	9774.65	4.11224	2.03993	4.29533e-69	2.43061e-68	NC_006071.1	108979	109602	+	624	YALI0_E00990g	GO:0016020;GO:0016021	-	-	YALI0E00990p [Yarrowia lipolytica CLIB122]	YALI0_E00990g	YALI0E00990g	2912934
gene1575	536.983	235.584	838.381	3.55874	1.83137	1.11823e-68	6.30001e-68	NC_006068.1	2247415	2248341	-	927	YALI0_B17050g	GO:0005978;GO:0008466;GO:0016740;GO:0016757	-	-	YALI0B17050p [Yarrowia lipolytica CLIB122]	YALI0_B17050g	YALI0B17050g	2906780
gene4841	2758.78	1827.74	3689.83	2.01879	1.01349	2.61621e-68	1.46879e-67	NC_006071.1	2024135	2029109	+	4464	YALI0_E17105g	GO:0000166;GO:0000287;GO:0005524;GO:0005886;GO:0015914;GO:0016020;GO:0016021;GO:0045332;GO:0140326	-	-	YALI0E17105p [Yarrowia lipolytica CLIB122]	YALI0_E17105g	YALI0E17105g	2911650
gene5079	1178.74	693.384	1664.09	2.39996	1.26301	4.03018e-68	2.25866e-67	NC_006071.1	2646973	2647701	-	729	YALI0_E22484g	GO:0005829;GO:0006541	-	-	YALI0E22484p [Yarrowia lipolytica CLIB122]	YALI0_E22484g	YALI0E22484g	2912986
gene1645	3190.63	2054.63	4326.63	2.1058	1.07437	4.26329e-68	2.38722e-67	NC_006068.1	2440054	2441865	+	1812	YALI0_B18568g	GO:0005886;GO:0072659	-	-	YALI0B18568p [Yarrowia lipolytica CLIB122]	YALI0_B18568g	YALI0B18568g	2907192
gene1661	1813.94	1146.38	2481.49	2.16463	1.11412	5.89718e-68	3.29062e-67	NC_006068.1	2484339	2485280	-	942	YALI0_B18898g	GO:0000287;GO:0003824;GO:0003864;GO:0005739;GO:0015940;GO:0016740	K00606	[EC:2.1.2.11]	YALI0B18898p [Yarrowia lipolytica CLIB122]	YALI0_B18898g	YALI0B18898g	2907032
gene4787	546.922	116.536	977.309	8.38635	3.06804	1.05834e-67	5.89017e-67	NC_006071.1	1887434	1888912	-	1479	YALI0_E15818g	GO:0004022;GO:0005739;GO:0016491;GO:0046872;GO:0055114	K11173	[EC:1.1.99.24]	YALI0E15818p [Yarrowia lipolytica CLIB122]	YALI0_E15818g	YALI0E15818g	2911563
gene5728	613.247	305.315	921.178	3.01713	1.59318	1.28878e-67	7.16029e-67	NC_006072.1	229416	229988	-	573	YALI0_F01474g	GO:0003676;GO:0003723;GO:0005634;GO:0005654;GO:1990904	-	-	YALI0F01474p [Yarrowia lipolytica CLIB122]	YALI0_F01474g	YALI0F01474g	2908017
gene2635	1149.78	676.217	1623.35	2.40063	1.26341	2.47473e-67	1.37254e-66	NC_006069.1	2501361	2503187	-	1827	YALI0_C18183g	GO:0016020;GO:0016021	-	-	YALI0C18183p [Yarrowia lipolytica CLIB122]	YALI0_C18183g	YALI0C18183g	2909991
gene4357	855.353	470.675	1240.03	2.63458	1.39757	4.35707e-67	2.41237e-66	NC_006071.1	676394	677533	+	1140	YALI0_E05907g	GO:0016020	-	-	YALI0E05907p [Yarrowia lipolytica CLIB122]	YALI0_E05907g	YALI0E05907g	2912337
gene1752	469.481	212.268	726.694	3.42347	1.77546	4.6188e-67	2.55507e-66	NC_006068.1	2761852	2762640	+	789	YALI0_B20988g	GO:0000245;GO:0000387;GO:0003700;GO:0005634;GO:0005681;GO:0005737;GO:0006355;GO:0032797	K13130	-	YALI0B20988p [Yarrowia lipolytica CLIB122]	YALI0_B20988g	YALI0B20988g	2906971
gene5870	5197.06	3346.62	7047.51	2.10586	1.07441	4.72435e-67	2.61121e-66	NC_006072.1	708580	709260	-	681	YALI0_F04620g	-	-	-	YALI0F04620p [Yarrowia lipolytica CLIB122]	YALI0_F04620g	YALI0F04620g	2908900
gene3917	2453.84	1614.71	3292.98	2.03937	1.02812	5.43461e-67	2.99862e-66	NC_006070.1	3012864	3014126	+	1263	YALI0_D23221g	-	-	-	YALI0D23221p [Yarrowia lipolytica CLIB122]	YALI0_D23221g	YALI0D23221g	2911024
gene3186	6262.24	3745.01	8779.47	2.34431	1.22916	5.67207e-67	3.12695e-66	NC_006070.1	812280	813770	+	1491	YALI0_D06325g	GO:0003824;GO:0004021;GO:0009058;GO:0030170	K00814	[EC:2.6.1.2]	YALI0D06325p [Yarrowia lipolytica CLIB122]	YALI0_D06325g	YALI0D06325g	2910869
gene58	2489.83	1644.11	3335.56	2.0288	1.02063	1.81863e-66	9.98304e-66	NC_006067.1	183955	184263	-	309	YALI0_A01452g	GO:0004866;GO:0010951;GO:0042144	-	-	YALI0A01452p [Yarrowia lipolytica CLIB122]	YALI0_A01452g	YALI0A01452g	7009333
gene1933	468.566	212.713	724.42	3.40563	1.76792	2.74012e-66	1.50029e-65	NC_006069.1	213910	215832	-	1923	YALI0_C01573g	GO:0003684;GO:0003887;GO:0005634;GO:0005657;GO:0006281;GO:0009314;GO:0035861;GO:0042276	K03509	[EC:2.7.7.7]	YALI0C01573p [Yarrowia lipolytica CLIB122]	YALI0_C01573g	YALI0C01573g	2909127
gene4124	657.015	339.487	974.543	2.87064	1.52137	1.56608e-65	8.51655e-65	NC_006071.1	75969	77336	+	1368	YALI0_E00748g	GO:0005385;GO:0005886;GO:0016020;GO:0016021;GO:0030001;GO:0046873;GO:0055085;GO:0071577	-	-	YALI0E00748p [Yarrowia lipolytica CLIB122]	YALI0_E00748g	YALI0E00748g	2912892
gene1795	321.344	121.913	520.775	4.27169	2.09481	1.69542e-65	9.20435e-65	NC_006068.1	2871401	2872576	+	1176	YALI0_B21890g	GO:0005829;GO:1902531;GO:1903577	-	-	YALI0B21890p [Yarrowia lipolytica CLIB122]	YALI0_B21890g	YALI0B21890g	2907050
gene2324	1410.73	869.571	1951.9	2.24467	1.1665	4.05777e-65	2.18997e-64	NC_006069.1	1466301	1467449	-	1149	YALI0_C10604g	GO:0005506;GO:0005739;GO:0016491;GO:0045329;GO:0050353;GO:0055114	K00474	[EC:1.14.11.8]	YALI0C10604p [Yarrowia lipolytica CLIB122]	YALI0_C10604g	YALI0C10604g	2909477
gene3325	356.638	139.582	573.693	4.11009	2.03917	4.28567e-65	2.30908e-64	NC_006070.1	1193180	1193470	+	291	YALI0_D09333g	-	-	-	YALI0D09333p [Yarrowia lipolytica CLIB122]	YALI0_D09333g	YALI0D09333g	7009500
gene6792	523.738	251.666	795.809	3.16216	1.66091	8.66249e-65	4.65555e-64	NC_006072.1	3262962	3264704	-	1743	YALI0_F25333g	GO:0000328;GO:0004180;GO:0004181;GO:0006807;GO:0016787;GO:0046872;GO:0051603	K01293	[EC:3.4.17.4]	YALI0F25333p [Yarrowia lipolytica CLIB122]	YALI0_F25333g	YALI0F25333g	2907890
gene2734	182.483	44.9153	320.05	7.12563	2.83302	1.43632e-64	7.69998e-64	NC_006069.1	2752948	2754684	-	1737	YALI0_C20361g	GO:0016020;GO:0016021	-	-	YALI0C20361p [Yarrowia lipolytica CLIB122]	YALI0_C20361g	YALI0C20361g	2909879
gene293	108.135	11.8367	204.433	17.2711	4.11029	2.06556e-64	1.10364e-63	NC_006067.1	718992	720782	-	1791	YALI0_A07447g	GO:0005887;GO:0006855;GO:0016020;GO:0016021;GO:0055085	-	-	YALI0A07447p [Yarrowia lipolytica CLIB122]	YALI0_A07447g	YALI0A07447g	2906101
gene2551	1480.69	923.039	2038.34	2.20829	1.14293	2.07444e-64	1.10746e-63	NC_006069.1	2278141	2278794	+	654	YALI0_C16049g	GO:0005515;GO:0005634;GO:0005737;GO:0006414	-	-	YALI0C16049p [Yarrowia lipolytica CLIB122]	YALI0_C16049g	YALI0C16049g	2909245
gene4614	1203.29	644.555	1762.02	2.7337	1.45085	3.57896e-64	1.90908e-63	NC_006071.1	1435236	1436015	-	780	YALI0_E11825g	GO:0000149;GO:0005484;GO:0006886;GO:0006896;GO:0006906;GO:0012505;GO:0016020;GO:0016021;GO:0016192;GO:0031201;GO:0048278	-	-	YALI0E11825p [Yarrowia lipolytica CLIB122]	YALI0_E11825g	YALI0E11825g	2912799
gene5498	509.562	129.783	889.34	6.85251	2.77663	3.90476e-64	2.08113e-63	NC_006071.1	3737079	3738431	-	1353	YALI0_E31603g	GO:0009395;GO:0016788	-	-	YALI0E31603p [Yarrowia lipolytica CLIB122]	YALI0_E31603g	YALI0E31603g	2912965
gene4508	4234.5	1680.55	6788.45	4.03943	2.01415	3.95515e-64	2.10624e-63	NC_006071.1	1139464	1142250	-	2787	YALI0_E09471g	GO:0000139;GO:0000166;GO:0005388;GO:0005524;GO:0005794;GO:0006811;GO:0006816;GO:0006874;GO:0008553;GO:0015410;GO:0016020;GO:0016021;GO:0070588;GO:0071421;GO:1902600	K01537	[EC:7.2.2.10]	YALI0E09471p [Yarrowia lipolytica CLIB122]	YALI0_E09471g	YALI0E09471g	2911589
gene3521	2109.12	1380.49	2837.75	2.05561	1.03957	4.57434e-64	2.42993e-63	NC_006070.1	1689863	1693037	-	3129	YALI0_D13684g	GO:0007165	K19845	-	YALI0D13684p [Yarrowia lipolytica CLIB122]	YALI0_D13684g	YALI0D13684g	2910257
gene4582	1000.65	581.916	1419.38	2.43915	1.28638	5.72101e-64	3.03654e-63	NC_006071.1	1361654	1363354	+	1701	YALI0_E11121g	GO:0016020;GO:0016021	-	-	YALI0E11121p [Yarrowia lipolytica CLIB122]	YALI0_E11121g	YALI0E11121g	2912740
gene1711	2528.33	1637.21	3419.44	2.08857	1.06252	7.73468e-64	4.10194e-63	NC_006068.1	2647260	2649374	-	1449	YALI0_B20108g	GO:0005737	-	-	YALI0B20108p [Yarrowia lipolytica CLIB122]	YALI0_B20108g	YALI0B20108g	2906893
gene5206	330.199	48.5004	611.897	12.6163	3.65722	9.22338e-64	4.8874e-63	NC_006071.1	3012359	3014170	-	1812	YALI0_E25179g	GO:0005887;GO:0016020;GO:0016021;GO:0055085	-	-	YALI0E25179p [Yarrowia lipolytica CLIB122]	YALI0_E25179g	YALI0E25179g	2912709
gene4458	1185.92	569.684	1802.15	3.16342	1.66149	1.38904e-63	7.32415e-63	NC_006071.1	986512	987807	+	1296	YALI0_E08360g	GO:0003824;GO:0005044;GO:0006897;GO:0009058;GO:0016020;GO:0030170;GO:0047536	-	-	YALI0E08360p [Yarrowia lipolytica CLIB122]	YALI0_E08360g	YALI0E08360g	2912486
gene2390	13684.6	8555.45	18813.8	2.19904	1.13688	1.43335e-63	7.54537e-63	NC_006069.1	1673180	1675084	-	1905	YALI0_C12100g	GO:0000329;GO:0003333;GO:0005290;GO:0005302;GO:0005313;GO:0015171;GO:0015189;GO:0015194;GO:0015813;GO:0015825;GO:0015828;GO:0016020;GO:0016021;GO:0061459;GO:0089709;GO:1903400;GO:1903401	-	-	YALI0C12100p [Yarrowia lipolytica CLIB122]	YALI0_C12100g	YALI0C12100g	2910115
gene344	426.635	158.167	695.102	4.39473	2.13577	4.22565e-63	2.20994e-62	NC_006067.1	859076	860422	+	1347	YALI0_A08734g	GO:0003824;GO:0008483;GO:0030170	-	-	YALI0A08734p [Yarrowia lipolytica CLIB122]	YALI0_A08734g	YALI0A08734g	2905862
gene6741	1724.59	1107.23	2341.95	2.11514	1.08075	1.0981e-62	5.70565e-62	NC_006072.1	3156936	3157637	-	702	YALI0_F24145g	GO:0016020;GO:0016021;GO:0055114	-	-	YALI0F24145p [Yarrowia lipolytica CLIB122]	YALI0_F24145g	YALI0F24145g	2908725
gene4720	6049.38	3740.23	8358.53	2.23477	1.16012	3.44972e-62	1.78092e-61	NC_006071.1	1708099	1713012	+	4914	YALI0_E14234g	GO:0000166;GO:0000329;GO:0005524;GO:0016020;GO:0016021;GO:0016887;GO:0042626;GO:0055085	-	-	YALI0E14234p [Yarrowia lipolytica CLIB122]	YALI0_E14234g	YALI0E14234g	2911505
gene671	1049	621.807	1476.2	2.37405	1.24735	4.30984e-62	2.22139e-61	NC_006067.1	1792518	1793090	-	573	YALI0_A17336g	-	-	-	YALI0A17336p [Yarrowia lipolytica CLIB122]	YALI0_A17336g	YALI0A17336g	2906190
gene4540	5003.54	2889.72	7117.37	2.463	1.30042	6.97142e-62	3.58171e-61	NC_006071.1	1254162	1255766	+	1605	YALI0_E10175g	GO:0004190;GO:0005576;GO:0006508;GO:0008233;GO:0009277;GO:0016787;GO:0030163;GO:0031505	-	-	YALI0E10175p [Yarrowia lipolytica CLIB122]	YALI0_E10175g	YALI0E10175g	2912589
gene5873	698.777	377.298	1020.26	2.70411	1.43515	1.68834e-61	8.64649e-61	NC_006072.1	724547	727954	+	3408	YALI0_F04686g	-	-	-	YALI0F04686p [Yarrowia lipolytica CLIB122]	YALI0_F04686g	YALI0F04686g	2908903
gene2202	243.23	81.96	404.499	4.93532	2.30314	1.73534e-60	8.77517e-60	NC_006069.1	1025159	1026760	-	1602	YALI0_C07744g	GO:0016020;GO:0016021	-	-	YALI0C07744p [Yarrowia lipolytica CLIB122]	YALI0_C07744g	YALI0C07744g	2909774
gene3620	820.311	465.953	1174.67	2.521	1.334	4.15286e-60	2.09339e-59	NC_006070.1	2008032	2008955	+	924	YALI0_D16269g	GO:0003824;GO:0004084;GO:0005829	K02619	[EC:4.1.3.38]	YALI0D16269p [Yarrowia lipolytica CLIB122]	YALI0_D16269g	YALI0D16269g	2911289
gene2224	968.402	571.701	1365.1	2.38779	1.25568	6.89241e-60	3.46077e-59	NC_006069.1	1128117	1130060	+	1944	YALI0_C08327g	GO:0003677	K21631	-	YALI0C08327p [Yarrowia lipolytica CLIB122]	YALI0_C08327g	YALI0C08327g	2909321
gene2922	826.288	470.742	1181.83	2.51058	1.32802	7.25519e-60	3.64007e-59	NC_006070.1	15943	17295	-	1353	YALI0_D00176g	GO:0003824;GO:0003985;GO:0003988;GO:0006635;GO:0016740;GO:0016746;GO:0016747	K08764	[EC:2.3.1.176]	YALI0D00176p [Yarrowia lipolytica CLIB122]	YALI0_D00176g	YALI0D00176g	2910372
gene4705	1719.92	1117.5	2322.34	2.07815	1.0553	7.92153e-60	3.97128e-59	NC_006071.1	1674133	1675443	+	1311	YALI0_E13904g	GO:0000407;GO:0032258;GO:0035091	K17919	-	YALI0E13904p [Yarrowia lipolytica CLIB122]	YALI0_E13904g	YALI0E13904g	2911490
gene5849	1074.92	634.628	1515.21	2.38755	1.25553	8.86954e-60	4.43615e-59	NC_006072.1	629994	631750	-	1302	YALI0_F04147g	GO:0005634;GO:0005737;GO:0008641;GO:0019781;GO:0032446;GO:0045116	K10686	[EC:6.2.1.45]	YALI0F04147p [Yarrowia lipolytica CLIB122]	YALI0_F04147g	YALI0F04147g	2907705
gene2023	1202.98	737.286	1668.68	2.26327	1.17841	1.39444e-59	6.95268e-59	NC_006069.1	484276	485916	-	1641	YALI0_C03652g	GO:0006508;GO:0008234	K08597	[EC:3.4.22.68]	YALI0C03652p [Yarrowia lipolytica CLIB122]	YALI0_C03652g	YALI0C03652g	2909911
gene5382	1230.86	763.354	1698.36	2.22487	1.15372	3.50885e-59	1.74275e-58	NC_006071.1	3444129	3445628	-	1500	YALI0_E29117g	-	-	-	YALI0E29117p [Yarrowia lipolytica CLIB122]	YALI0_E29117g	YALI0E29117g	2911853
gene748	286.177	109.669	462.685	4.21891	2.07687	9.40666e-59	4.64684e-58	NC_006067.1	2058778	2059719	+	942	YALI0_A19096g	GO:0005739;GO:0006633;GO:0019171	-	-	YALI0A19096p [Yarrowia lipolytica CLIB122]	YALI0_A19096g	YALI0A19096g	2906490
gene4795	3262.07	604.151	5919.99	9.79886	3.29261	1.16264e-58	5.73014e-58	NC_006071.1	1902673	1904811	-	2139	YALI0_E16016g	GO:0000038;GO:0001676;GO:0003824;GO:0004467;GO:0005324;GO:0005777;GO:0005811;GO:0006633;GO:0031235;GO:0031957;GO:0044539	-	-	YALI0E16016p [Yarrowia lipolytica CLIB122]	YALI0_E16016g	YALI0E16016g	2911572
gene1072	453.253	78.6992	827.807	10.5186	3.39487	1.48686e-58	7.30565e-58	NC_006068.1	738595	740820	-	2226	YALI0_B05456g	GO:0003824	-	-	YALI0B05456p [Yarrowia lipolytica CLIB122]	YALI0_B05456g	YALI0B05456g	2907314
gene4647	774.516	360.04	1188.99	3.30238	1.72351	1.85084e-58	9.06628e-58	NC_006071.1	1523978	1524907	-	930	YALI0_E12507g	-	-	-	YALI0E12507p [Yarrowia lipolytica CLIB122]	YALI0_E12507g	YALI0E12507g	2912837
gene1680	3254.61	479.698	6029.52	12.5694	3.65184	3.94912e-58	1.93152e-57	NC_006068.1	2557513	2559231	+	1719	YALI0_B19338g	GO:0003333;GO:0006865;GO:0015171;GO:0016020;GO:0016021;GO:0022857;GO:0055085	K16261	-	YALI0B19338p [Yarrowia lipolytica CLIB122]	YALI0_B19338g	YALI0B19338g	2907425
gene2300	6854.73	3953.77	9755.69	2.46744	1.30301	7.51751e-58	3.66286e-57	NC_006069.1	1376577	1378166	+	1590	YALI0_C10010g	GO:0003677;GO:0003700;GO:0006281;GO:0006355;GO:0008168;GO:0008270;GO:0032259;GO:0043565	-	-	YALI0C10010p [Yarrowia lipolytica CLIB122]	YALI0_C10010g	YALI0C10010g	2909453
gene3087	698.704	229.858	1167.55	5.07945	2.34467	1.24479e-57	6.05597e-57	NC_006070.1	510953	511882	+	930	YALI0_D04092g	GO:0004032;GO:0005829;GO:0008106;GO:0016491;GO:0055114	-	-	YALI0D04092p [Yarrowia lipolytica CLIB122]	YALI0_D04092g	YALI0D04092g	2910624
gene4911	91.6042	9.52937	173.679	18.2256	4.1879	2.05716e-56	9.87344e-56	NC_006071.1	2226611	2228014	+	1404	YALI0_E18700g	-	-	-	YALI0E18700p [Yarrowia lipolytica CLIB122]	YALI0_E18700g	YALI0E18700g	2911728
gene3264	1232.65	533.92	1931.37	3.61735	1.85493	2.10292e-56	1.00855e-55	NC_006070.1	1026155	1027735	+	1581	YALI0_D07986g	GO:0004144;GO:0005783;GO:0005789;GO:0008374;GO:0016020;GO:0016021;GO:0016740;GO:0016746;GO:0019432	K11155	-	YALI0D07986p [Yarrowia lipolytica CLIB122]	YALI0_D07986g	YALI0D07986g	2910950
gene1260	5234.16	2380.13	8088.18	3.39822	1.76478	3.16933e-56	1.5166e-55	NC_006068.1	1366507	1370348	+	3390	YALI0_B09991g	GO:0005515	-	-	YALI0B09991p [Yarrowia lipolytica CLIB122]	YALI0_B09991g	YALI0B09991g	2906975
gene1902	661.064	201.36	1120.77	5.566	2.47664	3.49143e-56	1.66949e-55	NC_006069.1	109863	111284	+	1422	YALI0_C00825g	GO:0005887;GO:0016020;GO:0016021;GO:0055085;GO:0071627	-	-	YALI0C00825p [Yarrowia lipolytica CLIB122]	YALI0_C00825g	YALI0C00825g	2909168
gene1751	1734.57	1147.31	2321.84	2.02372	1.01701	4.66751e-56	2.22522e-55	NC_006068.1	2760967	2761347	-	381	YALI0_B20966g	GO:0016020;GO:0016021	-	-	YALI0B20966p [Yarrowia lipolytica CLIB122]	YALI0_B20966g	YALI0B20966g	2906970
gene4361	2385.5	1501.74	3269.27	2.17699	1.12233	5.25248e-56	2.50224e-55	NC_006071.1	688464	689894	-	1431	YALI0_E05995g	GO:0016787	-	-	YALI0E05995p [Yarrowia lipolytica CLIB122]	YALI0_E05995g	YALI0E05995g	2912343
gene5768	20401	10980.1	29821.9	2.71599	1.44148	5.68468e-56	2.70613e-55	NC_006072.1	356477	357325	-	849	YALI0_F02343g	-	-	-	YALI0F02343p [Yarrowia lipolytica CLIB122]	YALI0_F02343g	YALI0F02343g	2908130
gene952	542.949	282.651	803.247	2.84183	1.50682	5.93893e-56	2.82506e-55	NC_006068.1	391012	392721	-	1710	YALI0_B02552g	GO:0006812;GO:0008324;GO:0016020;GO:0016021;GO:0055085;GO:0098655	-	-	YALI0B02552p [Yarrowia lipolytica CLIB122]	YALI0_B02552g	YALI0B02552g	2906687
gene6861	1035.18	633.686	1436.68	2.26719	1.1809	8.71347e-56	4.13262e-55	NC_006072.1	3424495	3426154	+	1518	YALI0_F26873g	GO:0000166;GO:0003924;GO:0005525;GO:0005940;GO:0015630;GO:0031105;GO:0061640	-	-	YALI0F26873p [Yarrowia lipolytica CLIB122]	YALI0_F26873g	YALI0F26873g	2909015
gene1103	539.614	19.0535	1060.17	55.6419	5.7981	1.02759e-55	4.86647e-55	NC_006068.1	822218	822748	-	531	YALI0_B06160g	-	-	-	YALI0B06160p [Yarrowia lipolytica CLIB122]	YALI0_B06160g	YALI0B06160g	2907611
gene6812	642.607	353.29	931.923	2.63784	1.39936	2.93593e-55	1.38122e-54	NC_006072.1	3319758	3321482	+	1725	YALI0_F25795g	GO:0015179;GO:0016020;GO:0016021;GO:0022857;GO:0055085;GO:1902475	-	-	YALI0F25795p [Yarrowia lipolytica CLIB122]	YALI0_F25795g	YALI0F25795g	2907688
gene6490	6115.83	2406.26	9825.4	4.08327	2.02972	1.31606e-54	6.13301e-54	NC_006072.1	2462113	2463315	+	1203	YALI0_F18458g	GO:0003677	-	-	YALI0F18458p [Yarrowia lipolytica CLIB122]	YALI0_F18458g	YALI0F18458g	2907834
gene4095	1323.03	765.077	1880.99	2.45856	1.29781	1.77851e-54	8.27009e-54	NC_006071.1	435	1553	-	1119	YALI0_E00110g	GO:0009395;GO:0016788	-	-	YALI0E00110p [Yarrowia lipolytica CLIB122]	YALI0_E00110g	YALI0E00110g	2912858
gene1931	443.254	217.9	668.608	3.06841	1.61749	2.6989e-54	1.25227e-53	NC_006069.1	210887	212377	-	1491	YALI0_C01507g	GO:0005515	-	-	YALI0C01507p [Yarrowia lipolytica CLIB122]	YALI0_C01507g	YALI0C01507g	2909129
gene4134	806.81	457.362	1156.26	2.52811	1.33806	3.54987e-54	1.64592e-53	NC_006071.1	102773	104830	-	2058	YALI0_E00968g	GO:0016020;GO:0016021;GO:0055085	-	-	YALI0E00968p [Yarrowia lipolytica CLIB122]	YALI0_E00968g	YALI0E00968g	2912933
gene494	114.982	20.4124	209.551	10.2659	3.35978	5.24067e-54	2.42461e-53	NC_006067.1	1310948	1311658	-	711	YALI0_A12705g	GO:0000287;GO:0003676;GO:0004523;GO:0043137;GO:0090502	K03469	[EC:3.1.26.4]	YALI0A12705p [Yarrowia lipolytica CLIB122]	YALI0_A12705g	YALI0A12705g	2906169
gene6384	6030.99	2748.67	9313.3	3.38829	1.76056	1.16464e-53	5.35736e-53	NC_006072.1	2167442	2169577	-	2136	YALI0_F16159g	GO:0004672;GO:0005524;GO:0006468	-	-	YALI0F16159p [Yarrowia lipolytica CLIB122]	YALI0_F16159g	YALI0F16159g	2908588
gene5262	24256.7	15519.9	32993.6	2.12589	1.08806	5.19761e-53	2.38066e-52	NC_006071.1	3142987	3143394	+	408	YALI0_E26477g	GO:0000786;GO:0000790;GO:0003677;GO:0005634;GO:0005694;GO:0006281;GO:0006325;GO:0006974;GO:0046982	K11251	-	YALI0E26477p [Yarrowia lipolytica CLIB122]	YALI0_E26477g	YALI0E26477g	2912378
gene5320	1063.21	664.693	1461.72	2.19909	1.13691	1.04669e-52	4.78052e-52	NC_006071.1	3283412	3284488	+	1077	YALI0_E27786g	GO:0000324;GO:0005886;GO:0016020;GO:0016021	-	-	YALI0E27786p [Yarrowia lipolytica CLIB122]	YALI0_E27786g	YALI0E27786g	2912219
gene1630	473.926	242.243	705.608	2.9128	1.54241	1.07078e-52	4.88705e-52	NC_006068.1	2383740	2385176	+	1437	YALI0_B18260g	GO:0016020;GO:0016021	-	-	YALI0B18260p [Yarrowia lipolytica CLIB122]	YALI0_B18260g	YALI0B18260g	2906672
gene1243	2848.6	1594.26	4102.95	2.57358	1.36377	2.35452e-52	1.0708e-51	NC_006068.1	1313254	1316376	+	2124	YALI0_B09603g	GO:0000149;GO:0005543;GO:0005545;GO:0005546;GO:0005886;GO:0005905;GO:0006897;GO:0006900;GO:0030136;GO:0030276;GO:0032050;GO:0048268;GO:0072583	K20044	-	YALI0B09603p [Yarrowia lipolytica CLIB122]	YALI0_B09603g	YALI0B09603g	2906984
gene308	617.785	250.623	984.947	3.92999	1.97453	2.73815e-52	1.24263e-51	NC_006067.1	752808	754259	-	1452	YALI0_A07821g	GO:0008047;GO:0043085	-	-	YALI0A07821p [Yarrowia lipolytica CLIB122]	YALI0_A07821g	YALI0A07821g	2906115
gene4506	159.736	43.8596	275.613	6.28398	2.65168	4.42194e-52	1.99969e-51	NC_006071.1	1136746	1137141	+	396	YALI0_E09427g	GO:0005623;GO:0045454	-	-	YALI0E09427p [Yarrowia lipolytica CLIB122]	YALI0_E09427g	YALI0E09427g	2912533
gene2467	605.271	335.151	875.391	2.61193	1.38512	4.88643e-52	2.20663e-51	NC_006069.1	1959565	1960674	+	1110	YALI0_C14058g	GO:0000124;GO:0003713;GO:0004402;GO:0006357;GO:0043966;GO:0070461;GO:1903508	K11362	-	YALI0C14058p [Yarrowia lipolytica CLIB122]	YALI0_C14058g	YALI0C14058g	2909727
gene3225	1245.95	504.184	1987.72	3.94246	1.97909	5.73379e-52	2.58746e-51	NC_006070.1	911614	913827	-	2214	YALI0_D07150g	GO:0004672;GO:0004674;GO:0005524;GO:0005634;GO:0005737;GO:0006468;GO:0035556	K08286	[EC:2.7.11.-]	YALI0D07150p [Yarrowia lipolytica CLIB122]	YALI0_D07150g	YALI0D07150g	2910797
gene5035	500.316	261.946	738.686	2.82	1.49569	6.48642e-52	2.92504e-51	NC_006071.1	2547882	2548708	-	465	YALI0_E21472g	GO:0047617	K17362	[EC:3.1.2.-]	YALI0E21472p [Yarrowia lipolytica CLIB122]	YALI0_E21472g	YALI0E21472g	7009566
gene6066	1543.27	813.028	2273.51	2.79635	1.48355	6.95157e-52	3.1326e-51	NC_006072.1	1249034	1250143	-	1110	YALI0_F08943g	GO:0003676;GO:0003723;GO:0003729;GO:0005634;GO:0005737;GO:0016973;GO:0071014;GO:0071028;GO:1990904;GO:2000815	-	-	YALI0F08943p [Yarrowia lipolytica CLIB122]	YALI0_F08943g	YALI0F08943g	2908096
gene5938	2173.45	1386.76	2960.15	2.13458	1.09395	9.11486e-52	4.09308e-51	NC_006072.1	917668	919368	+	1701	YALI0_F06116g	GO:0005092;GO:0005634;GO:0005737;GO:0005829;GO:0005968;GO:0007264;GO:0016192;GO:0017137;GO:0018344;GO:0050790	K23460	-	YALI0F06116p [Yarrowia lipolytica CLIB122]	YALI0_F06116g	YALI0F06116g	2908428
gene4010	1374.24	816.503	1931.98	2.36616	1.24255	1.04048e-51	4.66906e-51	NC_006070.1	3385452	3387584	-	2133	YALI0_D25388g	GO:0000166;GO:0004672;GO:0004674;GO:0005524;GO:0005737;GO:0006468;GO:0006914;GO:0015031;GO:0016020;GO:0016301;GO:0016310;GO:0016740;GO:0034045	K08269	[EC:2.7.11.1]	YALI0D25388p [Yarrowia lipolytica CLIB122]	YALI0_D25388g	YALI0D25388g	2910666
gene5426	878.832	533.426	1224.24	2.29505	1.19852	1.40618e-51	6.29252e-51	NC_006071.1	3554469	3556202	-	1734	YALI0_E30107g	GO:0000139;GO:0006487;GO:0016021;GO:0016757	-	-	YALI0E30107p [Yarrowia lipolytica CLIB122]	YALI0_E30107g	YALI0E30107g	2911458
gene5619	1564.95	794.055	2335.84	2.94166	1.55663	2.72878e-51	1.21686e-50	NC_006071.1	4050017	4052068	+	2052	YALI0_E34089g	GO:0016020;GO:0016021	-	-	YALI0E34089p [Yarrowia lipolytica CLIB122]	YALI0_E34089g	YALI0E34089g	2911706
gene2356	454.697	202.279	707.116	3.49574	1.8056	3.05182e-51	1.35997e-50	NC_006069.1	1558601	1559230	-	630	YALI0_C11319g	-	-	-	YALI0C11319p [Yarrowia lipolytica CLIB122]	YALI0_C11319g	YALI0C11319g	2909420
gene3698	583.388	321.774	845.002	2.62608	1.39291	3.57573e-51	1.59123e-50	NC_006070.1	2230540	2233188	-	2649	YALI0_D17988g	GO:0000981;GO:0003677;GO:0005634;GO:0006351;GO:0006355;GO:0006357;GO:0008270;GO:0046872	-	-	YALI0D17988p [Yarrowia lipolytica CLIB122]	YALI0_D17988g	YALI0D17988g	2911095
gene3035	484.305	252.265	716.344	2.83965	1.50571	4.37054e-51	1.9382e-50	NC_006070.1	353421	355997	-	2577	YALI0_D02783g	GO:0000981;GO:0001080;GO:0003677;GO:0005634;GO:0006351;GO:0006355;GO:0008270;GO:0046872	-	-	YALI0D02783p [Yarrowia lipolytica CLIB122]	YALI0_D02783g	YALI0D02783g	2910542
gene4529	1180.67	555.007	1806.33	3.25461	1.70249	5.04593e-51	2.23463e-50	NC_006071.1	1224407	1227058	+	2652	YALI0_E09955g	GO:0070822	-	-	YALI0E09955p [Yarrowia lipolytica CLIB122]	YALI0_E09955g	YALI0E09955g	2912578
gene840	12429.9	7495.92	17364	2.31646	1.21192	1.0812e-50	4.77169e-50	NC_006067.1	2276341	2278068	-	1728	YALI0_A21307g	GO:0005215;GO:0005315;GO:0006817;GO:0016020;GO:0016021;GO:0022857;GO:0055085	K08176	-	YALI0A21307p [Yarrowia lipolytica CLIB122]	YALI0_A21307g	YALI0A21307g	2906409
gene5248	776.799	462.003	1091.6	2.36274	1.24046	1.37966e-50	6.08057e-50	NC_006071.1	3108416	3109996	+	1581	YALI0_E26191g	GO:0005515	-	-	YALI0E26191p [Yarrowia lipolytica CLIB122]	YALI0_E26191g	YALI0E26191g	2912363
gene5706	179.012	56.2343	301.79	5.36664	2.42402	2.45628e-50	1.07885e-49	NC_006072.1	157346	161458	-	4113	YALI0_F00990g	-	-	-	YALI0F00990p [Yarrowia lipolytica CLIB122]	YALI0_F00990g	YALI0F00990g	2908207
gene3724	1648.27	361.59	2934.95	8.1168	3.02091	3.04283e-50	1.33282e-49	NC_006070.1	2335672	2337696	+	2025	YALI0_D18634g	-	-	-	YALI0D18634p [Yarrowia lipolytica CLIB122]	YALI0_D18634g	YALI0D18634g	2911126
gene4683	1433.51	951.256	1915.76	2.01392	1.01001	3.20576e-50	1.40227e-49	NC_006071.1	1607056	1608051	-	996	YALI0_E13343g	GO:0016706;GO:0055114	K19219	-	YALI0E13343p [Yarrowia lipolytica CLIB122]	YALI0_E13343g	YALI0E13343g	2912027
gene2710	415.787	207.265	624.308	3.01212	1.59078	3.69584e-50	1.61445e-49	NC_006069.1	2690334	2691284	+	951	YALI0_C19844g	-	-	-	YALI0C19844p [Yarrowia lipolytica CLIB122]	YALI0_C19844g	YALI0C19844g	2909930
gene3061	81.4171	8.68133	154.153	17.7568	4.1503	4.14362e-50	1.80636e-49	NC_006070.1	435674	436750	-	1077	YALI0_D03465g	GO:0003993;GO:0005576;GO:0016311;GO:0016787;GO:0046872	-	-	YALI0D03465p [Yarrowia lipolytica CLIB122]	YALI0_D03465g	YALI0D03465g	2910307
gene4520	1204.22	759.303	1649.14	2.17191	1.11896	6.53675e-50	2.84768e-49	NC_006071.1	1184098	1185057	-	960	YALI0_E09757g	-	-	-	YALI0E09757p [Yarrowia lipolytica CLIB122]	YALI0_E09757g	YALI0E09757g	2912566
gene4611	715.817	408.81	1022.82	2.50195	1.32306	7.92245e-50	3.44667e-49	NC_006071.1	1431742	1432653	+	912	YALI0_E11737g	-	-	-	YALI0E11737p [Yarrowia lipolytica CLIB122]	YALI0_E11737g	YALI0E11737g	2912796
gene3586	37493.3	20166.9	54819.6	2.7183	1.4427	1.0112e-49	4.39032e-49	NC_006070.1	1869677	1872241	-	2565	YALI0_D15334g	GO:0032933;GO:0045944;GO:0046983	-	-	YALI0D15334p [Yarrowia lipolytica CLIB122]	YALI0_D15334g	YALI0D15334g	2910756
gene2034	1323.59	863.583	1783.6	2.06535	1.04638	1.04896e-49	4.55115e-49	NC_006069.1	516586	518424	-	1839	YALI0_C03894g	GO:0016020;GO:0016021	-	-	YALI0C03894p [Yarrowia lipolytica CLIB122]	YALI0_C03894g	YALI0C03894g	2909674
gene5752	1151.66	733.726	1569.59	2.1392	1.09707	1.45026e-49	6.27533e-49	NC_006072.1	313651	314640	+	990	YALI0_F02013g	-	K05275	[EC:1.1.1.65]	YALI0F02013p [Yarrowia lipolytica CLIB122]	YALI0_F02013g	YALI0F02013g	2908144
gene4272	107.234	19.7173	194.75	9.87711	3.30409	1.92643e-49	8.31333e-49	NC_006071.1	446785	447234	-	450	YALI0_E04026g	GO:0016020;GO:0016021	-	-	YALI0E04026p [Yarrowia lipolytica CLIB122]	YALI0_E04026g	YALI0E04026g	2912176
gene3248	142.817	37.3775	248.257	6.64187	2.73159	2.64921e-49	1.14171e-48	NC_006070.1	988913	989515	-	603	YALI0_D07656g	-	-	-	YALI0D07656p [Yarrowia lipolytica CLIB122]	YALI0_D07656g	YALI0D07656g	2910904
gene4770	7731.43	4283.14	11179.7	2.61017	1.38414	4.28878e-49	1.84211e-48	NC_006071.1	1829460	1832239	-	2706	YALI0_E15378g	GO:0016491;GO:0055114	K14729	-	YALI0E15378p [Yarrowia lipolytica CLIB122]	YALI0_E15378g	YALI0E15378g	2911997
gene4557	1348.25	896.24	1800.26	2.00868	1.00625	2.57137e-48	1.0971e-47	NC_006071.1	1309106	1311064	-	1959	YALI0_E10549g	-	-	-	YALI0E10549p [Yarrowia lipolytica CLIB122]	YALI0_E10549g	YALI0E10549g	2912635
gene4812	1046.07	642.827	1449.3	2.25458	1.17286	3.03314e-48	1.29155e-47	NC_006071.1	1952360	1953652	+	1293	YALI0_E16434g	GO:0006673;GO:0016020;GO:0016021;GO:0030148;GO:0045140;GO:0070916	K22723	[EC:2.7.1.-]	YALI0E16434p [Yarrowia lipolytica CLIB122]	YALI0_E16434g	YALI0E16434g	2911595
gene3677	1708.06	1098.15	2317.97	2.11079	1.07778	4.22733e-48	1.79529e-47	NC_006070.1	2155291	2157291	+	2001	YALI0_D17534g	GO:0004806;GO:0006629	K14675	-	YALI0D17534p [Yarrowia lipolytica CLIB122]	YALI0_D17534g	YALI0D17534g	2911303
gene4951	32769.3	16428.8	49109.9	2.98925	1.57978	1.27052e-47	5.36375e-47	NC_006071.1	2338040	2340121	+	2082	YALI0_E19558g	GO:0016020;GO:0016021	-	-	YALI0E19558p [Yarrowia lipolytica CLIB122]	YALI0_E19558g	YALI0E19558g	2911768
gene1967	1512.59	954.002	2071.18	2.17104	1.11839	1.38218e-47	5.82751e-47	NC_006069.1	338433	340727	+	2295	YALI0_C02409g	GO:0009272;GO:0016020;GO:0016021;GO:0055085	-	-	YALI0C02409p [Yarrowia lipolytica CLIB122]	YALI0_C02409g	YALI0C02409g	2909082
gene5369	630.184	364.031	896.337	2.46226	1.29998	1.40057e-47	5.90115e-47	NC_006071.1	3422212	3422844	+	633	YALI0_E28853g	GO:0047617	-	-	YALI0E28853p [Yarrowia lipolytica CLIB122]	YALI0_E28853g	YALI0E28853g	2911866
gene1984	1137.8	740.093	1535.5	2.07474	1.05293	1.59134e-47	6.70054e-47	NC_006069.1	387189	388040	-	852	YALI0_C02805g	-	-	-	YALI0C02805p [Yarrowia lipolytica CLIB122]	YALI0_C02805g	YALI0C02805g	2909075
gene1375	2491.96	1570.54	3413.38	2.17338	1.11994	3.28522e-47	1.37876e-46	NC_006068.1	1681005	1683524	+	2520	YALI0_B12584g	GO:0004402;GO:0005634;GO:0006281;GO:0006357;GO:0006974;GO:0007049;GO:0016573;GO:0032777;GO:0035267	K11322	-	YALI0B12584p [Yarrowia lipolytica CLIB122]	YALI0_B12584g	YALI0B12584g	2907028
gene2952	1095.95	669.142	1522.75	2.27568	1.1863	3.59929e-47	1.50959e-46	NC_006070.1	88729	90285	+	1557	YALI0_D00825g	GO:0003824;GO:0009058;GO:0030170	-	-	YALI0D00825p [Yarrowia lipolytica CLIB122]	YALI0_D00825g	YALI0D00825g	2910406
gene4797	21626.8	13228.7	30024.9	2.26968	1.18249	4.24829e-47	1.78062e-46	NC_006071.1	1913947	1915863	+	1917	YALI0_E16060g	GO:0004620;GO:0004622;GO:0004623;GO:0005576;GO:0005737;GO:0005886;GO:0006629;GO:0009395;GO:0016042;GO:0016787;GO:0046475	K13333	[EC:3.1.1.5]	YALI0E16060p [Yarrowia lipolytica CLIB122]	YALI0_E16060g	YALI0E16060g	2911574
gene4590	89.0325	13.1183	164.947	12.5738	3.65234	4.25926e-47	1.78405e-46	NC_006071.1	1383658	1384108	+	198	YALI0_E11330g	-	-	-	YALI0E11330p [Yarrowia lipolytica CLIB122]	YALI0_E11330g	YALI0E11330g	7009548
gene6072	500.497	273.042	727.952	2.66608	1.41472	4.39702e-47	1.84055e-46	NC_006072.1	1263761	1264732	-	972	YALI0_F09075g	GO:0003824;GO:0016491;GO:0016616;GO:0050662;GO:0055114	-	-	YALI0F09075p [Yarrowia lipolytica CLIB122]	YALI0_F09075g	YALI0F09075g	2908334
gene2109	528.114	87.7587	968.469	11.0356	3.46409	4.56405e-47	1.90798e-46	NC_006069.1	736719	738083	+	1365	YALI0_C05709g	GO:0003824;GO:0008483;GO:0030170	-	-	YALI0C05709p [Yarrowia lipolytica CLIB122]	YALI0_C05709g	YALI0C05709g	2910107
gene5437	912.304	574.269	1250.34	2.17727	1.12252	8.2601e-47	3.4486e-46	NC_006071.1	3574198	3574755	-	558	YALI0_E30327g	GO:0016020;GO:0016021	-	-	YALI0E30327p [Yarrowia lipolytica CLIB122]	YALI0_E30327g	YALI0E30327g	2911980
gene2704	694.933	353.388	1036.48	2.93297	1.55236	8.35415e-47	3.4856e-46	NC_006069.1	2673732	2675642	-	1911	YALI0_C19712g	GO:0016020;GO:0016021;GO:0016787	K14642	[EC:3.6.1.5]	YALI0C19712p [Yarrowia lipolytica CLIB122]	YALI0_C19712g	YALI0C19712g	2909924
gene6183	373.539	174.287	572.791	3.28649	1.71655	1.09873e-46	4.57233e-46	NC_006072.1	1539037	1540110	-	1074	YALI0_F11649g	GO:0000030;GO:0004584;GO:0005783;GO:0005789;GO:0006506;GO:0016020;GO:0016021;GO:0016740;GO:0016757;GO:0031501;GO:0097502	K07542	[EC:2.4.1.-]	YALI0F11649p [Yarrowia lipolytica CLIB122]	YALI0_F11649g	YALI0F11649g	2908624
gene5173	1162.99	763.739	1562.24	2.04552	1.03247	1.53767e-46	6.3783e-46	NC_006071.1	2914510	2915610	-	1101	YALI0_E24453g	GO:0000045;GO:0000153;GO:0000422;GO:0005737;GO:0005829;GO:0006914;GO:0015031;GO:0019776	K08343	-	YALI0E24453p [Yarrowia lipolytica CLIB122]	YALI0_E24453g	YALI0E24453g	2912551
gene792	127.528	31.8654	223.19	7.00414	2.80821	3.40954e-46	1.41064e-45	NC_006067.1	2167629	2170157	-	2529	YALI0_A20152g	GO:0003746;GO:0003924;GO:0005525;GO:0005829;GO:0006414;GO:0043022;GO:1990904	K03234	-	YALI0A20152p [Yarrowia lipolytica CLIB122]	YALI0_A20152g	YALI0A20152g	2905798
gene2103	792.475	487.216	1097.73	2.25307	1.17189	3.43765e-46	1.42135e-45	NC_006069.1	711815	713072	-	387	YALI0_C05577g	GO:0016020;GO:0016021;GO:0016192;GO:0030173	-	-	YALI0C05577p [Yarrowia lipolytica CLIB122]	YALI0_C05577g	YALI0C05577g	2910101
gene2976	402.107	206.047	598.166	2.90305	1.53757	5.09343e-46	2.09785e-45	NC_006070.1	154787	157300	+	2514	YALI0_D01353g	GO:0000981;GO:0005634;GO:0006355;GO:0006357;GO:0008270	-	-	YALI0D01353p [Yarrowia lipolytica CLIB122]	YALI0_D01353g	YALI0D01353g	2910455
gene5582	486.501	265.67	707.332	2.66244	1.41275	1.00654e-45	4.11663e-45	NC_006071.1	3946167	3947246	-	1080	YALI0_E33297g	-	K06911	-	YALI0E33297p [Yarrowia lipolytica CLIB122]	YALI0_E33297g	YALI0E33297g	2911944
gene3003	576.714	321.818	831.611	2.5841	1.36966	1.56138e-45	6.36961e-45	NC_006070.1	227430	229307	+	1878	YALI0_D02024g	GO:0004190;GO:0006508;GO:0008233;GO:0016787;GO:0030163	-	-	YALI0D02024p [Yarrowia lipolytica CLIB122]	YALI0_D02024g	YALI0D02024g	2910484
gene6942	1429.78	451.916	2407.64	5.32764	2.4135	3.82491e-45	1.55443e-44	NC_006072.1	3646595	3649990	-	3396	YALI0_F28677g	-	-	-	YALI0F28677p [Yarrowia lipolytica CLIB122]	YALI0_F28677g	YALI0F28677g	2907681
gene1071	647.838	141.504	1154.17	8.15646	3.02794	4.34405e-45	1.76429e-44	NC_006068.1	737682	738299	+	618	YALI0_B05434g	GO:0016020;GO:0016021;GO:0043386	-	-	YALI0B05434p [Yarrowia lipolytica CLIB122]	YALI0_B05434g	YALI0B05434g	2907275
gene5521	2374.46	1033.39	3715.52	3.59547	1.84618	4.60515e-45	1.86915e-44	NC_006071.1	3802311	3804020	-	1710	YALI0_E32035g	GO:0006629;GO:0016020;GO:0016021	K01052	[EC:3.1.1.13]	YALI0E32035p [Yarrowia lipolytica CLIB122]	YALI0_E32035g	YALI0E32035g	2912092
gene3316	504.164	226.353	781.974	3.45467	1.78855	5.13306e-45	2.08079e-44	NC_006070.1	1162057	1162785	+	729	YALI0_D09141g	-	-	-	YALI0D09141p [Yarrowia lipolytica CLIB122]	YALI0_D09141g	YALI0D09141g	2910832
gene4947	383.642	195.613	571.671	2.92246	1.54718	8.2141e-45	3.31926e-44	NC_006071.1	2321840	2322187	-	300	YALI0_E19481g	GO:0002098;GO:0005737;GO:0005829;GO:0008033;GO:0032447;GO:0034227	K12161	-	YALI0E19481p [Yarrowia lipolytica CLIB122]	YALI0_E19481g	YALI0E19481g	7009564
gene4818	837.39	209.096	1465.68	7.00962	2.80934	8.80881e-45	3.5551e-44	NC_006071.1	1963367	1964413	+	1047	YALI0_E16577g	GO:0006355;GO:0008270;GO:0043565;GO:0046872	K18658	-	YALI0E16577p [Yarrowia lipolytica CLIB122]	YALI0_E16577g	YALI0E16577g	2911602
gene1301	1123.5	742.192	1504.8	2.02751	1.01971	1.73659e-44	6.97351e-44	NC_006068.1	1479973	1482402	+	2430	YALI0_B10890g	GO:0005515;GO:0043161;GO:0080008	K11801	-	YALI0B10890p [Yarrowia lipolytica CLIB122]	YALI0_B10890g	YALI0B10890g	2906819
gene1836	239.728	99.928	379.527	3.798	1.92524	2.04234e-44	8.18594e-44	NC_006068.1	2996736	2998304	+	1569	YALI0_B22814g	GO:0005886;GO:0016020;GO:0016021;GO:0071467	-	-	YALI0B22814p [Yarrowia lipolytica CLIB122]	YALI0_B22814g	YALI0B22814g	2907108
gene3819	957.505	567.539	1347.47	2.37423	1.24746	2.36853e-44	9.48151e-44	NC_006070.1	2641702	2643282	-	1581	YALI0_D20834g	GO:0005887;GO:0006855;GO:0016020;GO:0016021;GO:0055085	-	-	YALI0D20834p [Yarrowia lipolytica CLIB122]	YALI0_D20834g	YALI0D20834g	2910196
gene5195	5093.8	2427.56	7760.05	3.19665	1.67656	6.75287e-44	2.68317e-43	NC_006071.1	2979407	2981035	-	1629	YALI0_E24937g	GO:0003676;GO:0003700;GO:0005634;GO:0006355	-	-	YALI0E24937p [Yarrowia lipolytica CLIB122]	YALI0_E24937g	YALI0E24937g	2912669
gene4033	567.556	239.543	895.569	3.73866	1.90252	1.00126e-43	3.97346e-43	NC_006070.1	3447307	3450498	+	3192	YALI0_D25938g	GO:0004100;GO:0006031;GO:0016020;GO:0016021;GO:0016758;GO:0030428	K00698	[EC:2.4.1.16]	YALI0D25938p [Yarrowia lipolytica CLIB122]	YALI0_D25938g	YALI0D25938g	2910804
gene552	128.018	34.2452	221.79	6.47653	2.69522	1.28318e-43	5.08595e-43	NC_006067.1	1451184	1452236	-	1053	YALI0_A14322g	GO:0005515	-	-	YALI0A14322p [Yarrowia lipolytica CLIB122]	YALI0_A14322g	YALI0A14322g	2906502
gene3902	833.887	528.531	1139.24	2.15549	1.10802	3.49782e-43	1.37872e-42	NC_006070.1	2961283	2961903	-	621	YALI0_D22869g	-	K19992	-	YALI0D22869p [Yarrowia lipolytica CLIB122]	YALI0_D22869g	YALI0D22869g	2910248
gene1272	1812.76	1093.17	2532.36	2.31653	1.21196	3.93453e-43	1.5499e-42	NC_006068.1	1405420	1409632	+	4104	YALI0_B10241g	GO:0005737;GO:0007165;GO:0043087;GO:0046872	K19839	-	YALI0B10241p [Yarrowia lipolytica CLIB122]	YALI0_B10241g	YALI0B10241g	2907561
gene2116	861.15	549.28	1173.02	2.13556	1.09461	4.59602e-43	1.80937e-42	NC_006069.1	753575	753916	-	342	YALI0_C05863g	GO:0016020;GO:0016021	-	-	YALI0C05863p [Yarrowia lipolytica CLIB122]	YALI0_C05863g	YALI0C05863g	2909805
gene5554	1062.27	701.61	1422.93	2.02809	1.02012	4.91744e-43	1.93472e-42	NC_006071.1	3875538	3875960	-	423	YALI0_E32681g	GO:0003993;GO:0004725;GO:0004726;GO:0005737;GO:0006470;GO:0035335	K14394	-	YALI0E32681p [Yarrowia lipolytica CLIB122]	YALI0_E32681g	YALI0E32681g	2911801
gene3588	1019.68	669.646	1369.71	2.04543	1.0324	5.26296e-43	2.06939e-42	NC_006070.1	1881014	1882840	-	1827	YALI0_D15378g	GO:0001100;GO:0005096;GO:0005816;GO:0031578;GO:0043547;GO:0044732;GO:0046578;GO:1990334	-	-	YALI0D15378p [Yarrowia lipolytica CLIB122]	YALI0_D15378g	YALI0D15378g	2910758
gene1894	143.394	43.5741	243.215	5.58164	2.48069	1.08553e-42	4.25264e-42	NC_006069.1	80225	81895	-	1671	YALI0_C00627g	GO:0005887;GO:0016020;GO:0016021;GO:0022857;GO:0031224;GO:0055085	-	-	YALI0C00627p [Yarrowia lipolytica CLIB122]	YALI0_C00627g	YALI0C00627g	2909184
gene3170	373.166	162.168	584.165	3.60222	1.84888	1.42787e-42	5.58698e-42	NC_006070.1	756615	757361	-	747	YALI0_D05929g	GO:0016491;GO:0016616;GO:0055114	-	-	YALI0D05929p [Yarrowia lipolytica CLIB122]	YALI0_D05929g	YALI0D05929g	2911045
gene4279	1272.47	729.309	1815.63	2.48953	1.31587	3.20812e-42	1.24767e-41	NC_006071.1	469446	472460	+	3015	YALI0_E04169g	GO:0000166;GO:0000287;GO:0005524;GO:0005886;GO:0015914;GO:0016020;GO:0016021;GO:0045332;GO:0140326	K01530	[EC:7.6.2.1]	YALI0E04169p [Yarrowia lipolytica CLIB122]	YALI0_E04169g	YALI0E04169g	7009538
gene5465	246.933	107.995	385.872	3.57305	1.83715	4.63406e-42	1.79678e-41	NC_006071.1	3644077	3645354	-	1278	YALI0_E30921g	GO:0000149;GO:0035493	-	-	YALI0E30921p [Yarrowia lipolytica CLIB122]	YALI0_E30921g	YALI0E30921g	2911921
gene6655	4955.26	2579.62	7330.9	2.84185	1.50683	4.68108e-42	1.81392e-41	NC_006072.1	2934359	2937597	-	2841	YALI0_F22165g	-	K12609	-	YALI0F22165p [Yarrowia lipolytica CLIB122]	YALI0_F22165g	YALI0F22165g	2908834
gene5748	1464.34	762.476	2166.2	2.841	1.5064	5.81701e-42	2.24731e-41	NC_006072.1	302816	305422	+	2607	YALI0_F01925g	GO:0005515	K07126	-	YALI0F01925p [Yarrowia lipolytica CLIB122]	YALI0_F01925g	YALI0F01925g	2908152
gene5931	148.207	46.7261	249.688	5.34365	2.41782	6.38279e-42	2.4644e-41	NC_006072.1	888509	889948	+	1440	YALI0_F05984g	GO:0005887;GO:0016020;GO:0016021;GO:0022857;GO:0031224;GO:0055085	-	-	YALI0F05984p [Yarrowia lipolytica CLIB122]	YALI0_F05984g	YALI0F05984g	2908442
gene568	704.374	436.238	972.509	2.22931	1.1566	1.03691e-41	3.99392e-41	NC_006067.1	1503021	1504385	+	1365	YALI0_A14740g	-	-	-	YALI0A14740p [Yarrowia lipolytica CLIB122]	YALI0_A14740g	YALI0A14740g	2906230
gene6806	997.329	657.824	1336.83	2.0322	1.02305	1.04531e-41	4.02385e-41	NC_006072.1	3298922	3299779	-	858	YALI0_F25663g	GO:0000122;GO:0004407;GO:0016575;GO:0042826;GO:0070822	-	-	YALI0F25663p [Yarrowia lipolytica CLIB122]	YALI0_F25663g	YALI0F25663g	2907772
gene1319	707.977	439.051	976.904	2.22504	1.15383	1.20869e-41	4.64999e-41	NC_006068.1	1520437	1521513	+	1077	YALI0_B11286g	GO:0016301;GO:0016310;GO:0016740;GO:0032958	K00915	-	YALI0B11286p [Yarrowia lipolytica CLIB122]	YALI0_B11286g	YALI0B11286g	2907142
gene5647	141.543	43.538	239.548	5.50204	2.45997	1.2851e-41	4.94098e-41	NC_006071.1	4136808	4139528	+	2721	YALI0_E34727g	GO:0005085;GO:0005622;GO:0007264	K06681	-	YALI0E34727p [Yarrowia lipolytica CLIB122]	YALI0_E34727g	YALI0E34727g	2912050
gene4059	289.191	136.695	441.688	3.23119	1.69207	1.40026e-41	5.37728e-41	NC_006070.1	3535901	3537223	-	1323	YALI0_D26532g	GO:0016020;GO:0016021	-	-	YALI0D26532p [Yarrowia lipolytica CLIB122]	YALI0_D26532g	YALI0D26532g	2911085
gene947	753.325	473.259	1033.39	2.18357	1.12669	1.63294e-41	6.25961e-41	NC_006068.1	377163	377981	+	819	YALI0_B02420g	GO:0004364;GO:0005515;GO:0005737	-	-	YALI0B02420p [Yarrowia lipolytica CLIB122]	YALI0_B02420g	YALI0B02420g	2906848
gene2268	306.355	58.3415	554.368	9.50213	3.24825	1.69074e-41	6.47729e-41	NC_006069.1	1267112	1267828	-	717	YALI0_C09240g	-	-	-	YALI0C09240p [Yarrowia lipolytica CLIB122]	YALI0_C09240g	YALI0C09240g	2909755
gene388	1375.24	913.875	1836.61	2.00969	1.00698	2.03272e-41	7.76426e-41	NC_006067.1	987517	988580	+	534	YALI0_A09845g	GO:0016020;GO:0016021	K20359	-	YALI0A09845p [Yarrowia lipolytica CLIB122]	YALI0_A09845g	YALI0A09845g	7009357
gene1691	741.524	465.166	1017.88	2.18821	1.12975	2.51835e-41	9.61348e-41	NC_006068.1	2593898	2595288	-	1188	YALI0_B19624g	GO:0005779;GO:0007031;GO:0016020;GO:0016021;GO:0030674;GO:0045046	-	-	YALI0B19624p [Yarrowia lipolytica CLIB122]	YALI0_B19624g	YALI0B19624g	2907243
gene4915	9156.12	4889.43	13422.8	2.74527	1.45695	3.94921e-41	1.50398e-40	NC_006071.1	2242962	2243627	+	666	YALI0_E18788g	GO:0005199;GO:0005618	-	-	YALI0E18788p [Yarrowia lipolytica CLIB122]	YALI0_E18788g	YALI0E18788g	2912643
gene2960	189.481	42.1734	336.789	7.98582	2.99744	4.49451e-41	1.70861e-40	NC_006070.1	105790	106572	-	783	YALI0_D01001g	GO:0016787	-	-	YALI0D01001p [Yarrowia lipolytica CLIB122]	YALI0_D01001g	YALI0D01001g	2910413
gene5865	664.527	409.148	919.906	2.24835	1.16886	8.30173e-41	3.1429e-40	NC_006072.1	690361	692370	+	1152	YALI0_F04532g	GO:0004553;GO:0004568;GO:0005576;GO:0005975;GO:0006032;GO:0008061;GO:0008152;GO:0016787;GO:0016798	K01183	[EC:3.2.1.14]	YALI0F04532p [Yarrowia lipolytica CLIB122]	YALI0_F04532g	YALI0F04532g	2908887
gene371	126.32	36.0722	216.568	6.00375	2.58586	1.50903e-40	5.69616e-40	NC_006067.1	940352	941062	+	711	YALI0_A09449g	-	-	-	YALI0A09449p [Yarrowia lipolytica CLIB122]	YALI0_A09449g	YALI0A09449g	2905932
gene4314	56.0856	3.88425	108.287	27.8785	4.80108	1.754e-40	6.61696e-40	NC_006071.1	551854	552552	+	699	YALI0_E04961g	GO:0016020;GO:0016021	-	-	YALI0E04961p [Yarrowia lipolytica CLIB122]	YALI0_E04961g	YALI0E04961g	2912268
gene6313	2324.77	1546.64	3102.89	2.00621	1.00447	1.9158e-40	7.21884e-40	NC_006072.1	1960550	1961419	+	870	YALI0_F14619g	GO:0031505	-	-	YALI0F14619p [Yarrowia lipolytica CLIB122]	YALI0_F14619g	YALI0F14619g	2907771
gene4337	965.757	639.062	1292.45	2.02242	1.01608	2.99117e-40	1.12313e-39	NC_006071.1	601988	602629	+	642	YALI0_E05467g	GO:0005737;GO:0008119;GO:0008168;GO:0008757;GO:0010038;GO:0016740;GO:0032259	K00569	[EC:2.1.1.67]	YALI0E05467p [Yarrowia lipolytica CLIB122]	YALI0_E05467g	YALI0E05467g	2912317
gene6798	848.547	551.235	1145.86	2.07872	1.05569	8.5148e-40	3.17856e-39	NC_006072.1	3274573	3275244	-	672	YALI0_F25487g	GO:0047617	-	-	YALI0F25487p [Yarrowia lipolytica CLIB122]	YALI0_F25487g	YALI0F25487g	2908503
gene2410	82.5063	14.6502	150.362	10.2635	3.35945	1.14955e-39	4.28628e-39	NC_006069.1	1751310	1751861	-	552	YALI0_C12551g	-	-	-	YALI0C12551p [Yarrowia lipolytica CLIB122]	YALI0_C12551g	YALI0C12551g	2909389
gene5755	1670.55	746.812	2594.28	3.4738	1.79652	2.03123e-39	7.54305e-39	NC_006072.1	324520	326904	-	2385	YALI0_F02057g	-	-	-	YALI0F02057p [Yarrowia lipolytica CLIB122]	YALI0_F02057g	YALI0F02057g	2908146
gene712	650.096	403.021	897.171	2.22611	1.15453	2.83812e-39	1.0497e-38	NC_006067.1	1911597	1912631	+	1035	YALI0_A18249g	GO:0003676	-	-	YALI0A18249p [Yarrowia lipolytica CLIB122]	YALI0_A18249g	YALI0A18249g	2906504
gene843	73.6913	11.01	136.373	12.3863	3.63067	3.32501e-39	1.22765e-38	NC_006067.1	2292097	2293164	+	1068	YALI0_A21395g	-	-	-	YALI0A21395p [Yarrowia lipolytica CLIB122]	YALI0_A21395g	YALI0A21395g	2906432
gene4905	4356.39	2343.66	6369.11	2.7176	1.44233	4.3469e-39	1.60035e-38	NC_006071.1	2210886	2212130	-	1245	YALI0_E18568g	GO:0003824;GO:0003988;GO:0005777;GO:0006629;GO:0006631;GO:0006635;GO:0010124;GO:0016740;GO:0016746;GO:0016747	K07513	[EC:2.3.1.16]	YALI0E18568p [Yarrowia lipolytica CLIB122]	YALI0_E18568g	YALI0E18568g	2912002
gene6513	10071.3	5061.35	15081.2	2.97968	1.57516	4.54365e-39	1.67182e-38	NC_006072.1	2536751	2539441	+	2691	YALI0_F18964g	GO:0005887;GO:0016020;GO:0016021;GO:0035672;GO:0035673;GO:0055085	-	-	YALI0F18964p [Yarrowia lipolytica CLIB122]	YALI0_F18964g	YALI0F18964g	2909030
gene1170	225.217	98.2314	352.202	3.58543	1.84215	5.71682e-39	2.10228e-38	NC_006068.1	1045854	1047650	+	1797	YALI0_B07755g	GO:0003824	-	-	YALI0B07755p [Yarrowia lipolytica CLIB122]	YALI0_B07755g	YALI0B07755g	2907252
gene4459	466.45	267.559	665.341	2.4867	1.31424	6.11723e-39	2.24695e-38	NC_006071.1	987913	988671	-	759	YALI0_E08382g	GO:0016020;GO:0016021	-	-	YALI0E08382p [Yarrowia lipolytica CLIB122]	YALI0_E08382g	YALI0E08382g	2912487
gene2588	33941.7	20558.7	47324.8	2.30194	1.20285	1.15339e-38	4.22933e-38	NC_006069.1	2406286	2407956	+	1671	YALI0_C16995g	GO:0004611;GO:0004612;GO:0005524;GO:0005829;GO:0006094;GO:0017076	K01610	[EC:4.1.1.49]	YALI0C16995p [Yarrowia lipolytica CLIB122]	YALI0_C16995g	YALI0C16995g	2910080
gene2012	205.604	81.9526	329.255	4.01763	2.00634	2.23308e-38	8.15113e-38	NC_006069.1	449617	452211	+	2595	YALI0_C03399g	GO:0000188;GO:0003824;GO:0004721;GO:0004722;GO:0004724;GO:0006470;GO:0016787;GO:0043169;GO:0046872;GO:1990439	-	-	YALI0C03399p [Yarrowia lipolytica CLIB122]	YALI0_C03399g	YALI0C03399g	2909283
gene2527	336.683	176.315	497.052	2.81911	1.49524	6.63517e-38	2.40011e-37	NC_006069.1	2154066	2155055	-	990	YALI0_C15422g	-	-	-	YALI0C15422p [Yarrowia lipolytica CLIB122]	YALI0_C15422g	YALI0C15422g	2909407
gene6164	2224.3	689.711	3758.89	5.44995	2.44624	1.38808e-37	4.98451e-37	NC_006072.1	1489941	1492379	+	2439	YALI0_F11253g	GO:0003676;GO:0005634;GO:0005737;GO:0006397;GO:0008380	-	-	YALI0F11253p [Yarrowia lipolytica CLIB122]	YALI0_F11253g	YALI0F11253g	2907966
gene4273	366.004	198.014	533.995	2.69676	1.43123	1.42092e-37	5.09959e-37	NC_006071.1	448846	449799	+	954	YALI0_E04048g	GO:0016020;GO:0016021	K15117	-	YALI0E04048p [Yarrowia lipolytica CLIB122]	YALI0_E04048g	YALI0E04048g	2912177
gene3223	462.116	268.579	655.653	2.4412	1.28759	2.67066e-37	9.55273e-37	NC_006070.1	906572	908329	+	1758	YALI0_D07106g	-	-	-	YALI0D07106p [Yarrowia lipolytica CLIB122]	YALI0_D07106g	YALI0D07106g	2910795
gene5708	1208.64	751.327	1665.95	2.21734	1.14883	4.36378e-37	1.55482e-36	NC_006072.1	167513	169778	-	2217	YALI0_F01034g	GO:0000166;GO:0003677;GO:0003909;GO:0003910;GO:0005524;GO:0005634;GO:0005737;GO:0005739;GO:0006260;GO:0006266;GO:0006273;GO:0006281;GO:0006310;GO:0006974;GO:0016874;GO:0051103;GO:0071897;GO:1903461	K10747	-	YALI0F01034p [Yarrowia lipolytica CLIB122]	YALI0_F01034g	YALI0F01034g	2908208
gene2697	294.663	148.811	440.515	2.96023	1.56571	5.99165e-37	2.12775e-36	NC_006069.1	2658555	2659697	+	1143	YALI0_C19580g	GO:0004061;GO:0009056;GO:0009435;GO:0016787	-	-	YALI0C19580p [Yarrowia lipolytica CLIB122]	YALI0_C19580g	YALI0C19580g	2909943
gene1618	2840.82	1515.04	4166.59	2.75015	1.45951	1.00216e-36	3.54902e-36	NC_006068.1	2349711	2352518	-	2808	YALI0_B17996g	GO:0009986;GO:0042973;GO:0052861	K22485	[EC:3.2.1.6]	YALI0B17996p [Yarrowia lipolytica CLIB122]	YALI0_B17996g	YALI0B17996g	2906908
gene2513	496.414	233.992	758.836	3.24299	1.69733	2.17535e-36	7.6615e-36	NC_006069.1	2120833	2123379	+	2547	YALI0_C15202g	GO:0000981;GO:0003677;GO:0005634;GO:0006351;GO:0006355;GO:0006357;GO:0008270;GO:0046872	-	-	YALI0C15202p [Yarrowia lipolytica CLIB122]	YALI0_C15202g	YALI0C15202g	2909352
gene2965	248.767	51.6054	445.929	8.64113	3.11122	2.70329e-36	9.50522e-36	NC_006070.1	121504	123282	-	1779	YALI0_D01111g	GO:0005215;GO:0005351;GO:0005887;GO:0016020;GO:0016021;GO:0022857;GO:0034219;GO:0055085;GO:1902600	-	-	YALI0D01111p [Yarrowia lipolytica CLIB122]	YALI0_D01111g	YALI0D01111g	2910417
gene1240	2674.35	546.257	4802.45	8.79154	3.13612	3.53341e-36	1.23969e-35	NC_006068.1	1299098	1300786	-	1689	YALI0_B09537g	GO:0003333;GO:0006865;GO:0015171;GO:0016020;GO:0016021;GO:0022857;GO:0055085	K16261	-	YALI0B09537p [Yarrowia lipolytica CLIB122]	YALI0_B09537g	YALI0B09537g	2907567
gene4428	1185.85	608.184	1763.51	2.89963	1.53587	5.27882e-36	1.84802e-35	NC_006071.1	874406	877894	+	3489	YALI0_E07601g	GO:0005096;GO:0005737;GO:0007165;GO:0035091;GO:0043087;GO:0043547	K08773	-	YALI0E07601p [Yarrowia lipolytica CLIB122]	YALI0_E07601g	YALI0E07601g	2912448
gene2403	865.396	442.25	1288.54	2.91361	1.54281	5.46279e-36	1.91138e-35	NC_006069.1	1724345	1725714	+	828	YALI0_C12364g	GO:0000790;GO:0000978;GO:0000980;GO:0003676;GO:0003677;GO:0005634;GO:0005667;GO:0031519;GO:0043565	-	-	YALI0C12364p [Yarrowia lipolytica CLIB122]	YALI0_C12364g	YALI0C12364g	2909380
gene6466	3263.8	1995.02	4532.59	2.27195	1.18393	6.43332e-36	2.24606e-35	NC_006072.1	2393204	2397730	-	4527	YALI0_F17996g	GO:0000166;GO:0005524;GO:0005886;GO:0016020;GO:0016021;GO:0016887;GO:0042626;GO:0055085	K08712	-	YALI0F17996p [Yarrowia lipolytica CLIB122]	YALI0_F17996g	YALI0F17996g	2908366
gene1428	76.6514	14.3798	138.923	9.66096	3.27217	7.49395e-36	2.61351e-35	NC_006068.1	1857153	1858748	+	1596	YALI0_B13838g	GO:0004497;GO:0005506;GO:0016491;GO:0016705;GO:0016712;GO:0020037;GO:0046872;GO:0055114	-	-	YALI0B13838p [Yarrowia lipolytica CLIB122]	YALI0_B13838g	YALI0B13838g	2907636
gene211	566.592	340.288	792.897	2.33007	1.22038	8.19389e-36	2.84987e-35	NC_006067.1	553814	554782	+	969	YALI0_A05357g	GO:0004721;GO:0006470;GO:0016787	K17615	[EC:3.1.3.16]	YALI0A05357p [Yarrowia lipolytica CLIB122]	YALI0_A05357g	YALI0A05357g	2905954
gene2830	570.277	353.5	787.054	2.22646	1.15475	9.90602e-36	3.44163e-35	NC_006069.1	3013749	3014582	+	834	YALI0_C22572g	GO:0016020;GO:0016021	-	-	YALI0C22572p [Yarrowia lipolytica CLIB122]	YALI0_C22572g	YALI0C22572g	2909667
gene4598	315.462	5.0473	625.877	124.002	6.95422	1.14224e-35	3.96418e-35	NC_006071.1	1400671	1403070	-	2400	YALI0_E11473g	GO:0006813;GO:0015079;GO:0016020;GO:0016021;GO:0071805	K03549	-	YALI0E11473p [Yarrowia lipolytica CLIB122]	YALI0_E11473g	YALI0E11473g	2912780
gene6719	1110.97	651.656	1570.28	2.40968	1.26884	2.04681e-35	7.06908e-35	NC_006072.1	3108585	3110615	-	2031	YALI0_F23683g	GO:0003676;GO:0003723	K15561	-	YALI0F23683p [Yarrowia lipolytica CLIB122]	YALI0_F23683g	YALI0F23683g	2908752
gene2441	1822.03	699.841	2944.22	4.20698	2.07278	3.83369e-35	1.3212e-34	NC_006069.1	1845801	1847336	-	1536	YALI0_C13420g	-	-	-	YALI0C13420p [Yarrowia lipolytica CLIB122]	YALI0_C13420g	YALI0C13420g	2909536
gene6961	692.678	449.59	935.766	2.08138	1.05754	7.19715e-35	2.47106e-34	NC_006072.1	3688042	3688959	-	918	YALI0_F29249g	-	-	-	YALI0F29249p [Yarrowia lipolytica CLIB122]	YALI0_F29249g	YALI0F29249g	2908756
gene4580	439.636	258.869	620.402	2.39659	1.26098	1.76808e-34	6.04786e-34	NC_006071.1	1352587	1353900	-	1314	YALI0_E11077g	GO:0004672;GO:0005524;GO:0005634;GO:0006468	K08827	[EC:2.7.11.1]	YALI0E11077p [Yarrowia lipolytica CLIB122]	YALI0_E11077g	YALI0E11077g	2912737
gene6911	610.5	388.398	832.602	2.14368	1.10009	1.99166e-34	6.80535e-34	NC_006072.1	3561814	3562509	+	696	YALI0_F27973g	GO:0005829;GO:0006508;GO:0008234;GO:0016920	-	-	YALI0F27973p [Yarrowia lipolytica CLIB122]	YALI0_F27973g	YALI0F27973g	2908342
gene4028	487.584	266.561	708.607	2.65833	1.41052	2.2509e-34	7.68298e-34	NC_006070.1	3433171	3437157	+	3987	YALI0_D25828g	GO:0000166;GO:0005524;GO:0016020;GO:0016021;GO:0016887;GO:0042626;GO:0055085	-	-	YALI0D25828p [Yarrowia lipolytica CLIB122]	YALI0_D25828g	YALI0D25828g	2910127
gene1871	182.481	77.2916	287.671	3.72189	1.89604	3.39642e-34	1.15684e-33	NC_006069.1	11541	12740	+	1200	YALI0_C00110g	-	K01045	-	YALI0C00110p [Yarrowia lipolytica CLIB122]	YALI0_C00110g	YALI0C00110g	2909401
gene2128	640.8	247.174	1034.43	4.18502	2.06523	3.60104e-34	1.22523e-33	NC_006069.1	794217	795230	-	1014	YALI0_C06127g	GO:0016020;GO:0016021	-	-	YALI0C06127p [Yarrowia lipolytica CLIB122]	YALI0_C06127g	YALI0C06127g	2909235
gene2339	577.424	365.022	789.826	2.16378	1.11355	9.78091e-34	3.29643e-33	NC_006069.1	1508683	1509573	+	891	YALI0_C10901g	GO:0004799;GO:0005739;GO:0005829;GO:0006231;GO:0032259	K00560	[EC:2.1.1.45]	YALI0C10901p [Yarrowia lipolytica CLIB122]	YALI0_C10901g	YALI0C10901g	2909366
gene5700	1277.5	639.376	1915.63	2.99609	1.58308	9.87834e-34	3.32752e-33	NC_006072.1	133335	134645	-	1311	YALI0_F00858g	GO:0000188;GO:0000754;GO:0004725;GO:0005634;GO:0005737;GO:0006470;GO:0008138;GO:0010969;GO:0016311;GO:0016787;GO:0016791;GO:0017017;GO:0035335	K11240	[EC:3.1.3.48]	YALI0F00858p [Yarrowia lipolytica CLIB122]	YALI0_F00858g	YALI0F00858g	2908221
gene5709	413.416	202.792	624.039	3.07724	1.62164	1.48653e-33	4.98904e-33	NC_006072.1	170708	174214	-	3507	YALI0_F01056g	GO:0007165;GO:0008047;GO:0030010;GO:0030950;GO:0031532;GO:0031929;GO:0031932;GO:0032956;GO:0042325;GO:0043085;GO:0051897	K08267	-	YALI0F01056p [Yarrowia lipolytica CLIB122]	YALI0_F01056g	YALI0F01056g	2908209
gene7019	427.586	252.542	602.63	2.38626	1.25475	1.55613e-33	5.21991e-33	NC_006072.1	3827536	3828732	-	1197	YALI0_F30635g	GO:0005515	-	-	YALI0F30635p [Yarrowia lipolytica CLIB122]	YALI0_F30635g	YALI0F30635g	2907654
gene6846	588.599	374.921	802.276	2.13985	1.09751	2.16372e-33	7.24288e-33	NC_006072.1	3397285	3398130	-	846	YALI0_F26543g	GO:0000287;GO:0003676;GO:0004518;GO:0004519;GO:0004523;GO:0016787;GO:0043137;GO:0046872;GO:0090502	K03469	[EC:3.1.26.4]	YALI0F26543p [Yarrowia lipolytica CLIB122]	YALI0_F26543g	YALI0F26543g	2909048
gene3773	442.205	164.185	720.226	4.38668	2.13313	4.4257e-33	1.47531e-32	NC_006070.1	2496100	2497794	-	1695	YALI0_D19756g	GO:0005886;GO:0015205;GO:0015851;GO:0016020;GO:0016021;GO:0022857;GO:0055085	-	-	YALI0D19756p [Yarrowia lipolytica CLIB122]	YALI0_D19756g	YALI0D19756g	2911183
gene5230	1242	600.551	1883.46	3.13621	1.64902	4.57936e-33	1.52574e-32	NC_006071.1	3062382	3064634	+	2253	YALI0_E25806g	-	-	-	YALI0E25806p [Yarrowia lipolytica CLIB122]	YALI0_E25806g	YALI0E25806g	2912611
gene2890	6234.04	1232.53	11235.5	9.11583	3.18837	8.85346e-33	2.93151e-32	NC_006069.1	3195532	3197631	-	2100	YALI0_C23859g	GO:0003997;GO:0005504;GO:0005777;GO:0006631;GO:0006635;GO:0016627;GO:0033540;GO:0050660;GO:0055088;GO:0055114;GO:0071949	K00232	[EC:1.3.3.6]	YALI0C23859p [Yarrowia lipolytica CLIB122]	YALI0_C23859g	YALI0C23859g	2909505
gene5390	739.553	441.387	1037.72	2.35104	1.2333	9.0482e-33	2.99291e-32	NC_006071.1	3470847	3472997	+	2151	YALI0_E29307g	GO:0004721;GO:0004722;GO:0004724;GO:0005634;GO:0005737;GO:0006470;GO:0016787;GO:0046872;GO:0048037	K06269	[EC:3.1.3.16]	YALI0E29307p [Yarrowia lipolytica CLIB122]	YALI0_E29307g	YALI0E29307g	2911976
gene1013	2158.3	1434.63	2881.97	2.00885	1.00637	9.27755e-33	3.0656e-32	NC_006068.1	541803	543500	+	1698	YALI0_B04070g	GO:0005768;GO:0006623;GO:0006886;GO:0010008;GO:0016020;GO:0032266;GO:0033565;GO:0043130;GO:0043328;GO:0045324;GO:0046872	-	-	YALI0B04070p [Yarrowia lipolytica CLIB122]	YALI0_B04070g	YALI0B04070g	2906618
gene5705	4748.18	1905.04	7591.32	3.98487	1.99453	1.00067e-32	3.30314e-32	NC_006072.1	153234	156797	+	3564	YALI0_F00968g	GO:0005515;GO:0016020;GO:0016021	-	-	YALI0F00968p [Yarrowia lipolytica CLIB122]	YALI0_F00968g	YALI0F00968g	2908206
gene1551	539.053	339.684	738.421	2.17385	1.12025	1.87814e-32	6.17736e-32	NC_006068.1	2176308	2178041	+	1734	YALI0_B16522g	GO:0003333;GO:0006865;GO:0015171;GO:0016020;GO:0016021;GO:0022857;GO:0055085	K16261	-	YALI0B16522p [Yarrowia lipolytica CLIB122]	YALI0_B16522g	YALI0B16522g	2907446
gene892	122.248	11.1122	233.384	21.0025	4.39249	2.13772e-32	7.02393e-32	NC_006068.1	191112	192779	-	1668	YALI0_B01166g	GO:0005515	-	-	YALI0B01166p [Yarrowia lipolytica CLIB122]	YALI0_B01166g	YALI0B01166g	2907522
gene2848	586.571	311.384	861.757	2.76751	1.46859	2.22736e-32	7.31099e-32	NC_006069.1	3077465	3082698	+	5130	YALI0_C22946g	GO:0005515	K20178	-	YALI0C22946p [Yarrowia lipolytica CLIB122]	YALI0_C22946g	YALI0C22946g	2909640
gene5569	504.741	314.815	694.666	2.20658	1.14181	4.37886e-32	1.42357e-31	NC_006071.1	3926184	3926891	-	708	YALI0_E33011g	-	-	-	YALI0E33011p [Yarrowia lipolytica CLIB122]	YALI0_E33011g	YALI0E33011g	2912555
gene5123	495.93	301.595	690.265	2.28872	1.19454	4.3792e-32	1.42357e-31	NC_006071.1	2753429	2754586	-	1158	YALI0_E23430g	-	-	-	YALI0E23430p [Yarrowia lipolytica CLIB122]	YALI0_E23430g	YALI0E23430g	2912299
gene6471	336.831	64.8349	608.827	9.39041	3.23119	6.99156e-32	2.25906e-31	NC_006072.1	2408652	2410631	+	1980	YALI0_F18084g	GO:0005366;GO:0005887;GO:0015798;GO:0016020;GO:0016021;GO:0022857;GO:0055085	-	-	YALI0F18084p [Yarrowia lipolytica CLIB122]	YALI0_F18084g	YALI0F18084g	2908664
gene3068	644.152	423.386	864.918	2.04286	1.03059	1.14888e-31	3.69912e-31	NC_006070.1	458429	459202	-	774	YALI0_D03641g	-	-	-	YALI0D03641p [Yarrowia lipolytica CLIB122]	YALI0_D03641g	YALI0D03641g	2910582
gene3715	6545.34	3020.91	10069.8	3.33336	1.73698	3.97384e-31	1.26677e-30	NC_006070.1	2304592	2309008	-	4371	YALI0_D18403g	GO:0005737;GO:0005975;GO:0006629;GO:0006694;GO:0008194;GO:0008202;GO:0016020;GO:0016126;GO:0016740;GO:0016757;GO:0016758;GO:0016906;GO:0030259;GO:0043231;GO:0102202;GO:0102203;GO:0102205	K05841	[EC:2.4.1.173]	YALI0D18403p [Yarrowia lipolytica CLIB122]	YALI0_D18403g	YALI0D18403g	2911115
gene4926	442.103	263.603	620.602	2.35431	1.2353	5.23656e-31	1.66682e-30	NC_006071.1	2272152	2272484	+	333	YALI0_E19030g	-	-	-	YALI0E19030p [Yarrowia lipolytica CLIB122]	YALI0_E19030g	YALI0E19030g	2911742
gene7081	1839.98	707.508	2972.44	4.20129	2.07083	5.47024e-31	1.73947e-30	NC_006072.1	3979479	3981272	+	1794	YALI0_F32065g	-	-	-	YALI0F32065p [Yarrowia lipolytica CLIB122]	YALI0_F32065g	YALI0F32065g	2907742
gene2241	568.387	367.02	769.754	2.09731	1.06854	6.96061e-31	2.20901e-30	NC_006069.1	1180709	1182466	-	1758	YALI0_C08701g	GO:0000166;GO:0000723;GO:0000781;GO:0000784;GO:0003677;GO:0003678;GO:0003684;GO:0003690;GO:0004386;GO:0005524;GO:0005634;GO:0005694;GO:0006281;GO:0006303;GO:0006310;GO:0006974;GO:0016787;GO:0032508;GO:0042162;GO:0043564;GO:0071480;GO:0071481	K10884	-	YALI0C08701p [Yarrowia lipolytica CLIB122]	YALI0_C08701g	YALI0C08701g	2910012
gene1685	61.4559	4.18182	118.73	28.3919	4.82741	8.1292e-31	2.57697e-30	NC_006068.1	2572098	2573687	+	1590	YALI0_B19470g	GO:0005886;GO:0015355;GO:0016020;GO:0016021;GO:0022857;GO:0035879;GO:0055085	K08178	-	YALI0B19470p [Yarrowia lipolytica CLIB122]	YALI0_B19470g	YALI0B19470g	2907271
gene3034	3212.01	694.083	5729.93	8.2554	3.04534	9.20306e-31	2.91203e-30	NC_006070.1	348741	350642	+	1902	YALI0_D02761g	GO:0000079;GO:0019901	-	-	YALI0D02761p [Yarrowia lipolytica CLIB122]	YALI0_D02761g	YALI0D02761g	2910541
gene1765	285.892	155.005	416.779	2.68882	1.42697	1.08379e-30	3.42089e-30	NC_006068.1	2789441	2790022	-	582	YALI0_B21274g	GO:0016020;GO:0016021	-	-	YALI0B21274p [Yarrowia lipolytica CLIB122]	YALI0_B21274g	YALI0B21274g	2906702
gene1807	2023.68	1194.48	2852.88	2.38838	1.25603	1.11233e-30	3.50925e-30	NC_006068.1	2914791	2916563	+	1773	YALI0_B22176g	GO:0000981;GO:0003676;GO:0005634;GO:0006357	K21544	-	YALI0B22176p [Yarrowia lipolytica CLIB122]	YALI0_B22176g	YALI0B22176g	2906658
gene3950	3287.74	1392.14	5183.34	3.72328	1.89657	1.18508e-30	3.73511e-30	NC_006070.1	3121686	3124535	-	2850	YALI0_D23925g	GO:0000122;GO:0005737;GO:0006808;GO:0031930	-	-	YALI0D23925p [Yarrowia lipolytica CLIB122]	YALI0_D23925g	YALI0D23925g	2910961
gene4874	582.44	379.378	785.502	2.0705	1.04998	1.55288e-30	4.88472e-30	NC_006071.1	2106763	2108013	-	1251	YALI0_E17853g	GO:0005515;GO:0046872	-	-	YALI0E17853p [Yarrowia lipolytica CLIB122]	YALI0_E17853g	YALI0E17853g	2911688
gene6168	230.471	69.6565	391.285	5.61735	2.48989	1.67285e-30	5.25951e-30	NC_006072.1	1500670	1501628	-	813	YALI0_F11341g	GO:0003712;GO:0006357;GO:0016592	K15163	-	YALI0F11341p [Yarrowia lipolytica CLIB122]	YALI0_F11341g	YALI0F11341g	2909018
gene5371	345.256	199.221	491.291	2.46606	1.30221	2.83205e-30	8.86932e-30	NC_006071.1	3426341	3426751	+	411	YALI0_E28897g	GO:0003677;GO:0006355	-	-	YALI0E28897p [Yarrowia lipolytica CLIB122]	YALI0_E28897g	YALI0E28897g	2911870
gene6205	649.448	432.518	866.377	2.0031	1.00224	3.05649e-30	9.55824e-30	NC_006072.1	1599754	1600251	-	498	YALI0_F12133g	GO:0016020;GO:0016021	-	-	YALI0F12133p [Yarrowia lipolytica CLIB122]	YALI0_F12133g	YALI0F12133g	2907957
gene554	345.684	199.644	491.725	2.46301	1.30042	3.15077e-30	9.83867e-30	NC_006067.1	1454373	1454951	-	579	YALI0_A14366g	GO:0016020;GO:0016021	-	-	YALI0A14366p [Yarrowia lipolytica CLIB122]	YALI0_A14366g	YALI0A14366g	2905727
gene984	479.855	225.605	734.105	3.25394	1.70219	4.92733e-30	1.53265e-29	NC_006068.1	479489	480451	+	963	YALI0_B03344g	GO:0008272;GO:0015116;GO:0015117;GO:0015131;GO:0015140;GO:0015141;GO:0015297;GO:0015709;GO:0015729;GO:0016020;GO:0016021;GO:0035435;GO:0071422;GO:0071423;GO:1902356;GO:1902358	K13577	-	YALI0B03344p [Yarrowia lipolytica CLIB122]	YALI0_B03344g	YALI0B03344g	2907253
gene862	389.847	208.179	571.516	2.74531	1.45697	6.11249e-30	1.89854e-29	NC_006068.1	40842	42002	+	1161	YALI0_B00462g	GO:0003824;GO:0008410	K01796	[EC:5.1.99.4]	YALI0B00462p [Yarrowia lipolytica CLIB122]	YALI0_B00462g	YALI0B00462g	2906713
gene3492	1741.64	994.449	2488.82	2.50272	1.32349	6.24729e-30	1.93947e-29	NC_006070.1	1609746	1612338	-	1821	YALI0_D12969g	-	-	-	YALI0D12969p [Yarrowia lipolytica CLIB122]	YALI0_D12969g	YALI0D12969g	2911269
gene651	431.704	265.304	598.103	2.2544	1.17275	6.79517e-30	2.10854e-29	NC_006067.1	1734764	1736128	+	1365	YALI0_A16841g	GO:0000977;GO:0000981;GO:0003676;GO:0005634;GO:0006357	-	-	YALI0A16841p [Yarrowia lipolytica CLIB122]	YALI0_A16841g	YALI0A16841g	2905924
gene4287	1232.44	794.048	1670.84	2.1042	1.07327	1.07469e-29	3.3235e-29	NC_006071.1	492853	495006	-	2154	YALI0_E04356g	GO:0004842;GO:0005634;GO:0005737;GO:0006511;GO:0007049;GO:0016567;GO:0019005;GO:0031146;GO:0051301	K15081	-	YALI0E04356p [Yarrowia lipolytica CLIB122]	YALI0_E04356g	YALI0E04356g	2912194
gene2760	180.949	83.1146	278.783	3.3542	1.74597	1.8024e-29	5.54991e-29	NC_006069.1	2811174	2812328	+	1155	YALI0_C20977g	-	-	-	YALI0C20977p [Yarrowia lipolytica CLIB122]	YALI0_C20977g	YALI0C20977g	2909872
gene7041	237.176	100.381	373.971	3.7255	1.89743	1.93283e-29	5.94866e-29	NC_006072.1	3880691	3881326	-	636	YALI0_F31097g	-	-	-	YALI0F31097p [Yarrowia lipolytica CLIB122]	YALI0_F31097g	YALI0F31097g	2907661
gene822	102.323	18.1755	186.471	10.2595	3.35888	2.38633e-29	7.33386e-29	NC_006067.1	2238933	2241080	-	2148	YALI0_A20834g	GO:0000083;GO:0004407;GO:0016575;GO:0016787	K11484	[EC:3.5.1.98]	YALI0A20834p [Yarrowia lipolytica CLIB122]	YALI0_A20834g	YALI0A20834g	2905772
gene5991	2982.35	1690.62	4274.09	2.52813	1.33807	2.48018e-29	7.61497e-29	NC_006072.1	1058396	1060195	+	1800	YALI0_F07216g	-	-	-	YALI0F07216p [Yarrowia lipolytica CLIB122]	YALI0_F07216g	YALI0F07216g	2908451
gene1407	89.9695	26.2729	153.666	5.84885	2.54815	3.29945e-29	1.01111e-28	NC_006068.1	1798562	1799839	-	1278	YALI0_B13354g	GO:0046983	-	-	YALI0B13354p [Yarrowia lipolytica CLIB122]	YALI0_B13354g	YALI0B13354g	2907529
gene713	285.997	132.74	439.253	3.30913	1.72645	4.80808e-29	1.47061e-28	NC_006067.1	1920769	1923684	+	2916	YALI0_A18271g	GO:0008270	-	-	YALI0A18271p [Yarrowia lipolytica CLIB122]	YALI0_A18271g	YALI0A18271g	2906064
gene5737	152.187	64.8734	239.501	3.69182	1.88433	5.78749e-29	1.76765e-28	NC_006072.1	259243	261831	+	2589	YALI0_F01672g	GO:0000272;GO:0004553;GO:0005975;GO:0008152;GO:0008422;GO:0016787;GO:0016798;GO:0030245;GO:0102483	K05349	[EC:3.2.1.21]	YALI0F01672p [Yarrowia lipolytica CLIB122]	YALI0_F01672g	YALI0F01672g	2908155
gene3243	363.706	216.279	511.133	2.36331	1.24081	6.88892e-29	2.10006e-28	NC_006070.1	976432	977550	+	1119	YALI0_D07546g	GO:0005634;GO:0006281;GO:0006307;GO:0016491;GO:0035552;GO:0051213;GO:0055114	-	-	YALI0D07546p [Yarrowia lipolytica CLIB122]	YALI0_D07546g	YALI0D07546g	2910899
gene5890	2068.67	890.343	3246.99	3.64689	1.86667	8.17939e-29	2.49108e-28	NC_006072.1	772507	774657	-	2151	YALI0_F05126g	GO:0000122;GO:0000977;GO:0001227;GO:0005634;GO:0046983	-	-	YALI0F05126p [Yarrowia lipolytica CLIB122]	YALI0_F05126g	YALI0F05126g	2908631
gene2768	1722.64	1059.41	2385.88	2.25208	1.17126	1.39379e-28	4.21884e-28	NC_006069.1	2830917	2835823	-	4704	YALI0_C21186g	GO:0016491;GO:0055114	-	-	YALI0C21186p [Yarrowia lipolytica CLIB122]	YALI0_C21186g	YALI0C21186g	2909858
gene6623	174.847	81.0477	268.645	3.31466	1.72886	2.62855e-28	7.91898e-28	NC_006072.1	2845222	2849511	+	4290	YALI0_F21450g	-	-	-	YALI0F21450p [Yarrowia lipolytica CLIB122]	YALI0_F21450g	YALI0F21450g	2908006
gene5178	293.171	166.135	420.208	2.52932	1.33875	6.6241e-28	1.98259e-27	NC_006071.1	2926872	2929283	+	2412	YALI0_E24563g	GO:0004672;GO:0004674;GO:0005524;GO:0005634;GO:0005737;GO:0006468;GO:0035556	-	-	YALI0E24563p [Yarrowia lipolytica CLIB122]	YALI0_E24563g	YALI0E24563g	2912655
gene614	802.972	466.657	1139.29	2.44138	1.2877	1.3775e-27	4.09043e-27	NC_006067.1	1624552	1625481	+	930	YALI0_A15906g	GO:0004032;GO:0005829;GO:0008106;GO:0016491;GO:0055114	-	-	YALI0A15906p [Yarrowia lipolytica CLIB122]	YALI0_A15906g	YALI0A15906g	2906478
gene657	12631	7855.19	17406.8	2.21596	1.14793	1.56278e-27	4.63204e-27	NC_006067.1	1750799	1755141	-	4287	YALI0_A17020g	GO:0032126;GO:0045121;GO:0070941	-	-	YALI0A17020p [Yarrowia lipolytica CLIB122]	YALI0_A17020g	YALI0A17020g	2905905
gene4396	430.103	88.1884	772.017	8.75418	3.12997	1.67816e-27	4.97174e-27	NC_006071.1	784047	784583	+	537	YALI0_E06809g	GO:0005886;GO:0005935;GO:0016020;GO:0016021	-	-	YALI0E06809p [Yarrowia lipolytica CLIB122]	YALI0_E06809g	YALI0E06809g	2912412
gene4752	360.963	217.947	503.978	2.31238	1.20938	1.73953e-27	5.15116e-27	NC_006071.1	1790371	1791456	+	1086	YALI0_E14993g	-	-	-	YALI0E14993p [Yarrowia lipolytica CLIB122]	YALI0_E14993g	YALI0E14993g	2911540
gene3194	301.968	174.148	429.787	2.46794	1.30331	2.05862e-27	6.08482e-27	NC_006070.1	831525	832007	+	483	YALI0_D06479g	GO:0016020;GO:0016021	-	-	YALI0D06479p [Yarrowia lipolytica CLIB122]	YALI0_D06479g	YALI0D06479g	2910490
gene2301	251.642	136.871	366.413	2.67707	1.42066	2.13822e-27	6.31721e-27	NC_006069.1	1385221	1387191	-	1971	YALI0_C10032g	GO:0005524;GO:0005712;GO:0006298;GO:0016887;GO:0030983;GO:0032300;GO:0032389	K08734	-	YALI0C10032p [Yarrowia lipolytica CLIB122]	YALI0_C10032g	YALI0C10032g	2909454
gene6131	379.664	233.314	526.013	2.25453	1.17282	3.90464e-27	1.15147e-26	NC_006072.1	1410605	1413340	-	2736	YALI0_F10461g	GO:0005227;GO:0005886;GO:0016020;GO:0016021;GO:0034220	K21989	-	YALI0F10461p [Yarrowia lipolytica CLIB122]	YALI0_F10461g	YALI0F10461g	2907939
gene559	2687.71	1784.14	3591.28	2.01289	1.00927	6.70725e-27	1.96621e-26	NC_006067.1	1464698	1465219	+	522	YALI0_A14498g	GO:0005506;GO:0005634;GO:0005737;GO:0006555;GO:0008652;GO:0009086;GO:0010309;GO:0016491;GO:0019509;GO:0046872;GO:0051213;GO:0055114	K08967	-	YALI0A14498p [Yarrowia lipolytica CLIB122]	YALI0_A14498g	YALI0A14498g	2906238
gene3418	216.52	112.521	320.52	2.84853	1.51022	7.73589e-27	2.26465e-26	NC_006070.1	1417011	1417655	-	645	YALI0_D11286g	-	-	-	YALI0D11286p [Yarrowia lipolytica CLIB122]	YALI0_D11286g	YALI0D11286g	2910734
gene832	41.7704	4.46705	79.0738	17.7016	4.14581	1.0263e-26	2.99488e-26	NC_006067.1	2259591	2260382	-	792	YALI0_A21120g	GO:0016020;GO:0016021	-	-	YALI0A21120p [Yarrowia lipolytica CLIB122]	YALI0_A21120g	YALI0A21120g	2906454
gene3030	260.694	144.814	376.573	2.60039	1.37873	1.15983e-26	3.38148e-26	NC_006070.1	327672	329936	+	2265	YALI0_D02673g	GO:0005515	-	-	YALI0D02673p [Yarrowia lipolytica CLIB122]	YALI0_D02673g	YALI0D02673g	2910537
gene5165	1290.85	613.112	1968.59	3.21082	1.68294	1.73549e-26	5.03238e-26	NC_006071.1	2892715	2895907	+	3093	YALI0_E24277g	GO:0000981;GO:0005634;GO:0006355;GO:0006357;GO:0008270	-	-	YALI0E24277p [Yarrowia lipolytica CLIB122]	YALI0_E24277g	YALI0E24277g	2912542
gene2719	229.273	122.353	336.194	2.74774	1.45825	1.83962e-26	5.3295e-26	NC_006069.1	2712053	2712211	-	159	YALI0_C20060g	GO:0005507	-	-	YALI0C20060p [Yarrowia lipolytica CLIB122]	YALI0_C20060g	YALI0C20060g	7009470
gene4657	483.022	315.749	650.294	2.05953	1.04231	2.58294e-26	7.47618e-26	NC_006071.1	1547480	1551232	+	3753	YALI0_E12705g	GO:0005085;GO:0005515;GO:0005622;GO:0007264	-	-	YALI0E12705p [Yarrowia lipolytica CLIB122]	YALI0_E12705g	YALI0E12705g	2912575
gene4946	424.437	259.621	589.252	2.26966	1.18248	3.5363e-26	1.02218e-25	NC_006071.1	2321075	2321768	+	615	YALI0_E19470g	GO:0005515;GO:0005634;GO:0005737;GO:0008540;GO:0070682	K06693	-	YALI0E19470p [Yarrowia lipolytica CLIB122]	YALI0_E19470g	YALI0E19470g	2911764
gene5090	315.193	186.484	443.902	2.38038	1.25119	3.64261e-26	1.05196e-25	NC_006071.1	2683526	2683810	-	285	YALI0_E22737g	GO:0006914;GO:0015031;GO:0016020;GO:0034045	-	-	YALI0E22737p [Yarrowia lipolytica CLIB122]	YALI0_E22737g	YALI0E22737g	2912907
gene5772	520.844	299.19	742.498	2.48169	1.31133	3.71875e-26	1.07347e-25	NC_006072.1	373545	374774	+	1230	YALI0_F02431g	GO:0000724;GO:0005634;GO:0006281;GO:0006310;GO:0006312;GO:0045002	K10873	-	YALI0F02431p [Yarrowia lipolytica CLIB122]	YALI0_F02431g	YALI0F02431g	2908114
gene5000	71.0095	18.5855	123.433	6.64138	2.73148	4.04701e-26	1.16613e-25	NC_006071.1	2446749	2448440	-	1692	YALI0_E20691g	GO:0004371;GO:0005524;GO:0005829;GO:0006071;GO:0016310;GO:0019563	-	-	YALI0E20691p [Yarrowia lipolytica CLIB122]	YALI0_E20691g	YALI0E20691g	2911830
gene6442	2236.39	1233.51	3239.27	2.62605	1.39289	5.48465e-26	1.57613e-25	NC_006072.1	2332587	2335994	+	3408	YALI0_F17468g	GO:0000981;GO:0005634;GO:0006355;GO:0006357;GO:0008270	-	-	YALI0F17468p [Yarrowia lipolytica CLIB122]	YALI0_F17468g	YALI0F17468g	2908273
gene6210	527.353	351.459	703.247	2.00094	1.00068	5.57696e-26	1.60194e-25	NC_006072.1	1615591	1616241	+	651	YALI0_F12243g	-	-	-	YALI0F12243p [Yarrowia lipolytica CLIB122]	YALI0_F12243g	YALI0F12243g	2907951
gene796	152.261	67.2132	237.308	3.53068	1.81995	7.75711e-26	2.22022e-25	NC_006067.1	2178153	2180240	+	2088	YALI0_A20273g	GO:0005507;GO:0016020;GO:0016021;GO:0016491;GO:0046872;GO:0055114	-	-	YALI0A20273p [Yarrowia lipolytica CLIB122]	YALI0_A20273g	YALI0A20273g	2906537
gene1266	245.928	135.954	355.901	2.6178	1.38836	7.76099e-26	2.22034e-25	NC_006068.1	1386710	1387612	+	903	YALI0_B10109g	-	-	-	YALI0B10109p [Yarrowia lipolytica CLIB122]	YALI0_B10109g	YALI0B10109g	2907449
gene2579	12944.2	7986.12	17902.2	2.24167	1.16457	8.9938e-26	2.5696e-25	NC_006069.1	2363001	2365775	-	1593	YALI0_C16797g	GO:0016627;GO:0050660;GO:0055114	-	-	YALI0C16797p [Yarrowia lipolytica CLIB122]	YALI0_C16797g	YALI0C16797g	2909298
gene5182	890.56	573.332	1207.79	2.10661	1.07493	1.85747e-25	5.26241e-25	NC_006071.1	2942214	2945873	-	3660	YALI0_E24651g	GO:0016020;GO:0016021	-	-	YALI0E24651p [Yarrowia lipolytica CLIB122]	YALI0_E24651g	YALI0E24651g	2912656
gene4810	5332.57	2438.04	8227.1	3.37448	1.75466	3.37351e-25	9.53227e-25	NC_006071.1	1944914	1948039	-	3126	YALI0_E16368g	GO:0003824;GO:0003958;GO:0005829;GO:0010181;GO:0016491;GO:0050660;GO:0055114	K00380	[EC:1.8.1.2]	YALI0E16368p [Yarrowia lipolytica CLIB122]	YALI0_E16368g	YALI0E16368g	2911592
gene2718	295.128	174.597	415.659	2.38068	1.25137	6.20436e-25	1.74391e-24	NC_006069.1	2708687	2711812	+	3126	YALI0_C20053g	GO:0005247;GO:0005768;GO:0005769;GO:0005794;GO:0005886;GO:0005887;GO:0006821;GO:0015299;GO:0016020;GO:0016021;GO:0031404;GO:0055085;GO:1902476;GO:1902600	K05012	-	YALI0C20053p [Yarrowia lipolytica CLIB122]	YALI0_C20053g	YALI0C20053g	2909895
gene6276	324.901	197.595	452.206	2.28855	1.19443	7.19979e-25	2.01751e-24	NC_006072.1	1849700	1850884	-	1185	YALI0_F13761g	GO:0016020;GO:0016021	-	-	YALI0F13761p [Yarrowia lipolytica CLIB122]	YALI0_F13761g	YALI0F13761g	2908681
gene5585	62.9103	15.2542	110.566	7.24827	2.85764	7.31582e-25	2.04824e-24	NC_006071.1	3951313	3952506	-	1194	YALI0_E33363g	GO:0004190;GO:0005576;GO:0006508;GO:0008233;GO:0009277;GO:0016787;GO:0030163;GO:0031505	-	-	YALI0E33363p [Yarrowia lipolytica CLIB122]	YALI0_E33363g	YALI0E33363g	2911933
gene2723	462.408	304.739	620.078	2.03478	1.02488	1.1942e-24	3.33762e-24	NC_006069.1	2722015	2723811	-	1797	YALI0_C20119g	GO:0000045;GO:0000407;GO:0000422;GO:0003824;GO:0005737;GO:0006501;GO:0006914;GO:0006995;GO:0008641;GO:0015031;GO:0019778;GO:0019779;GO:0032446;GO:0034727;GO:0044805	K08337	-	YALI0C20119p [Yarrowia lipolytica CLIB122]	YALI0_C20119g	YALI0C20119g	2909898
gene6972	168.992	82.9266	255.057	3.0757	1.62091	1.56154e-24	4.35481e-24	NC_006072.1	3720154	3721155	+	1002	YALI0_F29623g	GO:0016491;GO:0055114	-	-	YALI0F29623p [Yarrowia lipolytica CLIB122]	YALI0_F29623g	YALI0F29623g	2908238
gene4076	339.186	209.613	468.759	2.23631	1.16112	2.67595e-24	7.44969e-24	NC_006070.1	3579951	3583433	-	3483	YALI0_D26950g	GO:0005815;GO:0008092;GO:0051493	-	-	YALI0D26950p [Yarrowia lipolytica CLIB122]	YALI0_D26950g	YALI0D26950g	2910877
gene5411	363.8	203.335	524.266	2.57833	1.36644	2.98143e-24	8.28577e-24	NC_006071.1	3527953	3529809	+	1857	YALI0_E29755g	GO:0005515	-	-	YALI0E29755p [Yarrowia lipolytica CLIB122]	YALI0_E29755g	YALI0E29755g	2911439
gene2270	352.684	73.2482	632.12	8.62983	3.10933	4.36437e-24	1.21029e-23	NC_006069.1	1273705	1275462	+	1758	YALI0_C09284g	GO:0003824	-	-	YALI0C09284p [Yarrowia lipolytica CLIB122]	YALI0_C09284g	YALI0C09284g	2909757
gene3984	5602.31	2700.75	8503.87	3.14871	1.65476	4.73208e-24	1.31113e-23	NC_006070.1	3291579	3293681	-	2103	YALI0_D24750g	GO:0003997;GO:0005504;GO:0005777;GO:0006629;GO:0006631;GO:0006635;GO:0016491;GO:0016627;GO:0033540;GO:0050660;GO:0055088;GO:0055114;GO:0071949	K00232	[EC:1.3.3.6]	YALI0D24750p [Yarrowia lipolytica CLIB122]	YALI0_D24750g	YALI0D24750g	2910308
gene3676	186.645	96.4264	276.864	2.87125	1.52168	5.41492e-24	1.49774e-23	NC_006070.1	2153303	2154310	-	1008	YALI0_D17512g	GO:0005515	-	-	YALI0D17512p [Yarrowia lipolytica CLIB122]	YALI0_D17512g	YALI0D17512g	2911302
gene3106	474.57	282.78	666.359	2.35645	1.23662	7.74589e-24	2.13145e-23	NC_006070.1	565648	569061	-	3414	YALI0_D04510g	-	K14237	-	YALI0D04510p [Yarrowia lipolytica CLIB122]	YALI0_D04510g	YALI0D04510g	2910642
gene108	1092.25	597.783	1586.71	2.65432	1.40834	9.36163e-24	2.56944e-23	NC_006067.1	330169	330954	+	786	YALI0_A02673g	GO:0008168;GO:0032259	-	-	YALI0A02673p [Yarrowia lipolytica CLIB122]	YALI0_A02673g	YALI0A02673g	2906503
gene1051	989.181	449.323	1529.04	3.40298	1.7668	2.67097e-23	7.28725e-23	NC_006068.1	675602	677335	-	1734	YALI0_B04906g	GO:0016627;GO:0055114	-	-	YALI0B04906p [Yarrowia lipolytica CLIB122]	YALI0_B04906g	YALI0B04906g	2907109
gene5284	126.108	55.4622	196.754	3.54753	1.82682	3.11111e-23	8.47727e-23	NC_006071.1	3197806	3199449	+	1644	YALI0_E26983g	GO:0008521;GO:0015295;GO:0015876;GO:0016020;GO:0016021;GO:1902600	-	-	YALI0E26983p [Yarrowia lipolytica CLIB122]	YALI0_E26983g	YALI0E26983g	2912770
gene6933	270.848	160.256	381.44	2.38019	1.25108	3.17885e-23	8.65452e-23	NC_006072.1	3620696	3621271	-	576	YALI0_F28479g	-	-	-	YALI0F28479p [Yarrowia lipolytica CLIB122]	YALI0_F28479g	YALI0F28479g	2908852
gene2902	274.561	163.29	385.832	2.36287	1.24054	3.74341e-23	1.017e-22	NC_006069.1	3228349	3229059	+	711	YALI0_C24123g	GO:0000776;GO:0000778;GO:0031511;GO:0034508	K11552	-	YALI0C24123p [Yarrowia lipolytica CLIB122]	YALI0_C24123g	YALI0C24123g	2909580
gene4937	2526.27	1410.1	3642.44	2.58312	1.36911	3.89681e-23	1.05822e-22	NC_006071.1	2291931	2293016	+	1086	YALI0_E19272g	-	-	-	YALI0E19272p [Yarrowia lipolytica CLIB122]	YALI0_E19272g	YALI0E19272g	2911755
gene3546	98.1497	37.0075	159.292	4.30431	2.10578	4.79044e-23	1.29815e-22	NC_006070.1	1750448	1751548	+	1101	YALI0_D14366g	GO:0005515	-	-	YALI0D14366p [Yarrowia lipolytica CLIB122]	YALI0_D14366g	YALI0D14366g	2910238
gene855	392.951	207.448	578.454	2.78843	1.47945	3.64133e-22	9.71172e-22	NC_006068.1	23954	24703	+	750	YALI0_B00308g	GO:0005634;GO:0005737;GO:0008420;GO:0043175;GO:0070940	K20827	[EC:3.1.3.16]	YALI0B00308p [Yarrowia lipolytica CLIB122]	YALI0_B00308g	YALI0B00308g	2907145
gene4385	101.343	26.5568	176.13	6.63221	2.72949	4.29736e-22	1.14471e-21	NC_006071.1	754245	756314	-	2070	YALI0_E06567g	GO:0003997;GO:0005504;GO:0005777;GO:0006631;GO:0006635;GO:0016627;GO:0033540;GO:0050660;GO:0055088;GO:0055114;GO:0071949	-	-	YALI0E06567p [Yarrowia lipolytica CLIB122]	YALI0_E06567g	YALI0E06567g	2912402
gene4251	1094.86	620.903	1568.82	2.52667	1.33724	4.48257e-22	1.19355e-21	NC_006071.1	394316	396862	+	2547	YALI0_E03564g	GO:0016020;GO:0016021	-	-	YALI0E03564p [Yarrowia lipolytica CLIB122]	YALI0_E03564g	YALI0E03564g	2912155
gene794	88.8924	33.1658	144.619	4.36048	2.12449	8.18108e-22	2.17203e-21	NC_006067.1	2176395	2177189	+	795	YALI0_A20207g	GO:0003824;GO:0004165;GO:0004300;GO:0005777;GO:0006635	-	-	YALI0A20207p [Yarrowia lipolytica CLIB122]	YALI0_A20207g	YALI0A20207g	2906000
gene583	103.828	42.9091	164.747	3.83946	1.9409	1.18878e-21	3.14704e-21	NC_006067.1	1560639	1561685	+	1047	YALI0_A15147g	GO:0004022;GO:0005737;GO:0008270;GO:0016491;GO:0046872;GO:0055114	K13953	[EC:1.1.1.1]	YALI0A15147p [Yarrowia lipolytica CLIB122]	YALI0_A15147g	YALI0A15147g	2905743
gene2865	44.2891	8.33748	80.2407	9.6241	3.26665	1.84913e-21	4.88509e-21	NC_006069.1	3120107	3120895	-	789	YALI0_C23298g	GO:0005886;GO:0015123;GO:0016020;GO:0016021;GO:0035433	-	-	YALI0C23298p [Yarrowia lipolytica CLIB122]	YALI0_C23298g	YALI0C23298g	2909605
gene3180	529.589	335.141	724.037	2.1604	1.1113	2.43081e-21	6.39545e-21	NC_006070.1	794324	796267	+	1944	YALI0_D06193g	GO:0000981;GO:0005634;GO:0006355;GO:0006357;GO:0008270	-	-	YALI0D06193p [Yarrowia lipolytica CLIB122]	YALI0_D06193g	YALI0D06193g	2910863
gene236	292.855	181.931	403.78	2.21941	1.15018	2.47389e-21	6.50612e-21	NC_006067.1	600195	601505	-	1311	YALI0_A06061g	-	-	-	YALI0A06061p [Yarrowia lipolytica CLIB122]	YALI0_A06061g	YALI0A06061g	2906403
gene5905	1081.67	556.526	1606.81	2.88722	1.52968	2.98813e-21	7.83927e-21	NC_006072.1	814546	816609	+	2064	YALI0_F05434g	GO:0016020;GO:0016021	-	-	YALI0F05434p [Yarrowia lipolytica CLIB122]	YALI0_F05434g	YALI0F05434g	2908197
gene5839	266.192	161.826	370.559	2.28985	1.19526	3.60661e-21	9.43481e-21	NC_006072.1	595748	596647	+	900	YALI0_F03971g	GO:0005515	-	-	YALI0F03971p [Yarrowia lipolytica CLIB122]	YALI0_F03971g	YALI0F03971g	2907708
gene1054	382.68	253.16	512.201	2.02323	1.01666	4.09026e-21	1.06739e-20	NC_006068.1	682960	683307	+	348	YALI0_B04972g	-	-	-	YALI0B04972p [Yarrowia lipolytica CLIB122]	YALI0_B04972g	YALI0B04972g	2906677
gene5354	98.6367	33.2217	164.052	4.93808	2.30395	4.60945e-21	1.20093e-20	NC_006071.1	3385104	3385775	-	672	YALI0_E28548g	-	-	-	YALI0E28548p [Yarrowia lipolytica CLIB122]	YALI0_E28548g	YALI0E28548g	2911619
gene4922	1136.59	170.881	2102.3	12.3027	3.62091	5.84401e-21	1.51949e-20	NC_006071.1	2258608	2260374	-	1767	YALI0_E18942g	GO:0004168;GO:0016020;GO:0016021;GO:0016310;GO:0030176;GO:0043048	K00902	[EC:2.7.1.108]	YALI0E18942p [Yarrowia lipolytica CLIB122]	YALI0_E18942g	YALI0E18942g	2911738
gene5005	137.864	63.487	212.241	3.34306	1.74117	6.6435e-21	1.72318e-20	NC_006071.1	2467110	2467580	+	471	YALI0_E20801g	GO:0016020;GO:0016021	-	-	YALI0E20801p [Yarrowia lipolytica CLIB122]	YALI0_E20801g	YALI0E20801g	2911835
gene1419	7879.34	5218.5	10540.2	2.01977	1.01419	1.25443e-20	3.24454e-20	NC_006068.1	1834328	1836085	-	1758	YALI0_B13640g	GO:0003676;GO:0003677;GO:0005634;GO:0005737;GO:0045944;GO:0046872	-	-	YALI0B13640p [Yarrowia lipolytica CLIB122]	YALI0_B13640g	YALI0B13640g	2907295
gene5541	1216.74	583.896	1849.59	3.16767	1.66342	1.28475e-20	3.32161e-20	NC_006071.1	3842659	3844761	-	2103	YALI0_E32417g	GO:0000228;GO:0006338;GO:0046983	-	-	YALI0E32417p [Yarrowia lipolytica CLIB122]	YALI0_E32417g	YALI0E32417g	2912827
gene1404	560.914	258.835	862.993	3.33414	1.73731	1.45415e-20	3.75353e-20	NC_006068.1	1785352	1788525	-	3174	YALI0_B13288g	-	-	-	YALI0B13288p [Yarrowia lipolytica CLIB122]	YALI0_B13288g	YALI0B13288g	2907532
gene2538	39.6838	6.88799	72.4797	10.5226	3.39542	2.10676e-20	5.42717e-20	NC_006069.1	2232419	2232559	+	141	YALI0_C15719g	-	-	-	YALI0C15719p [Yarrowia lipolytica CLIB122]	YALI0_C15719g	YALI0C15719g	2909435
gene1209	147.547	74.8519	220.242	2.94237	1.55698	2.16648e-20	5.57654e-20	NC_006068.1	1210467	1212137	+	1350	YALI0_B08800g	-	-	-	YALI0B08800p [Yarrowia lipolytica CLIB122]	YALI0_B08800g	YALI0B08800g	2906841
gene421	848.313	493.785	1202.84	2.43596	1.28449	2.68723e-20	6.90033e-20	NC_006067.1	1103915	1106437	-	2523	YALI0_A10637g	GO:0000981;GO:0003677;GO:0005634;GO:0006351;GO:0006355;GO:0006357;GO:0008270;GO:0016020;GO:0016021;GO:0046872	-	-	YALI0A10637p [Yarrowia lipolytica CLIB122]	YALI0_A10637g	YALI0A10637g	2905921
gene4522	375.057	249.642	500.472	2.00476	1.00343	2.96455e-20	7.60635e-20	NC_006071.1	1194421	1195392	-	972	YALI0_E09801g	-	-	-	YALI0E09801p [Yarrowia lipolytica CLIB122]	YALI0_E09801g	YALI0E09801g	2912568
gene3129	191.222	80.2366	302.207	3.76645	1.91321	3.439e-20	8.80609e-20	NC_006070.1	646214	649440	-	2646	YALI0_D05041g	GO:0000122;GO:0000790;GO:0000981;GO:0003676;GO:0003677;GO:0005634;GO:0006351;GO:0008270;GO:0043565;GO:0045944	-	-	YALI0D05041p [Yarrowia lipolytica CLIB122]	YALI0_D05041g	YALI0D05041g	2910968
gene731	206.521	118.638	294.405	2.48155	1.31124	3.64387e-20	9.32324e-20	NC_006067.1	2006115	2008319	+	2205	YALI0_A18700g	GO:0005096;GO:0005623;GO:0006886;GO:0017137;GO:0090630	K20176	-	YALI0A18700p [Yarrowia lipolytica CLIB122]	YALI0_A18700g	YALI0A18700g	2906255
gene2050	152.079	60.0846	244.073	4.06216	2.02225	1.07429e-19	2.71406e-19	NC_006069.1	572820	573968	-	1149	YALI0_C04279g	GO:0000324;GO:0004190;GO:0006508;GO:0008233;GO:0016787;GO:0030163;GO:0051603	-	-	YALI0C04279p [Yarrowia lipolytica CLIB122]	YALI0_C04279g	YALI0C04279g	2909397
gene325	46.6043	10.716	82.4926	7.69806	2.94449	1.27148e-19	3.20594e-19	NC_006067.1	808976	810025	-	1050	YALI0_A08217g	GO:0016787	K03787	[EC:3.1.3.5]	YALI0A08217p [Yarrowia lipolytica CLIB122]	YALI0_A08217g	YALI0A08217g	2905877
gene2786	3205.33	1450.69	4959.97	3.41905	1.7736	1.35704e-19	3.42033e-19	NC_006069.1	2895431	2897125	+	1389	YALI0_C21582g	GO:0000166;GO:0004672;GO:0005524;GO:0005739;GO:0005759;GO:0006468;GO:0016301;GO:0016310;GO:0016740;GO:0016772	-	-	YALI0C21582p [Yarrowia lipolytica CLIB122]	YALI0_C21582g	YALI0C21582g	2909824
gene6029	562.762	190.704	934.821	4.90195	2.29336	1.39236e-19	3.50795e-19	NC_006072.1	1142747	1144765	-	2019	YALI0_F08107g	-	-	-	YALI0F08107p [Yarrowia lipolytica CLIB122]	YALI0_F08107g	YALI0F08107g	2908534
gene5534	53.2005	14.4073	91.9936	6.3852	2.67473	1.6323e-19	4.10763e-19	NC_006071.1	3827192	3827698	-	507	YALI0_E32263g	-	-	-	YALI0E32263p [Yarrowia lipolytica CLIB122]	YALI0_E32263g	YALI0E32263g	2912602
gene6992	160.521	86.3964	234.645	2.71591	1.44143	2.75238e-19	6.89652e-19	NC_006072.1	3766514	3768112	+	1599	YALI0_F30063g	GO:0003333;GO:0015171;GO:0016020;GO:0016021	K15015	-	YALI0F30063p [Yarrowia lipolytica CLIB122]	YALI0_F30063g	YALI0F30063g	2908711
gene454	65.0692	21.5319	108.607	5.044	2.33457	3.94361e-19	9.8621e-19	NC_006067.1	1205848	1207452	+	1605	YALI0_A11605g	GO:0005887;GO:0006855;GO:0016020;GO:0016021;GO:0055085	-	-	YALI0A11605p [Yarrowia lipolytica CLIB122]	YALI0_A11605g	YALI0A11605g	2906402
gene5871	177.471	92.6688	262.273	2.83022	1.50091	5.46596e-19	1.36267e-18	NC_006072.1	713486	714499	+	1014	YALI0_F04642g	GO:0005515	-	-	YALI0F04642p [Yarrowia lipolytica CLIB122]	YALI0_F04642g	YALI0F04642g	2908901
gene2656	445.771	264.798	626.745	2.36688	1.24299	7.32145e-19	1.82241e-18	NC_006069.1	2557284	2560208	+	2925	YALI0_C18645g	GO:0000981;GO:0005634;GO:0006355;GO:0008270;GO:0009074;GO:0045944	-	-	YALI0C18645p [Yarrowia lipolytica CLIB122]	YALI0_C18645g	YALI0C18645g	2909959
gene184	26.6906	2.38231	50.9989	21.4074	4.42004	1.05903e-18	2.62893e-18	NC_006067.1	491273	492676	-	1404	YALI0_A04631g	GO:0005515	-	-	YALI0A04631p [Yarrowia lipolytica CLIB122]	YALI0_A04631g	YALI0A04631g	2906603
gene1037	311.736	204.734	418.738	2.04528	1.0323	1.71169e-18	4.23435e-18	NC_006068.1	628593	628961	+	369	YALI0_B04620g	GO:0030674;GO:0070682	-	-	YALI0B04620p [Yarrowia lipolytica CLIB122]	YALI0_B04620g	YALI0B04620g	2907042
gene5273	23.4931	1.49939	45.4868	30.3369	4.923	3.38177e-18	8.30812e-18	NC_006071.1	3172515	3174170	-	1656	YALI0_E26719g	GO:0000324;GO:0004553;GO:0004564;GO:0004575;GO:0005737;GO:0005975;GO:0005987;GO:0008152;GO:0016787;GO:0016798	K01193	[EC:3.2.1.26]	YALI0E26719p [Yarrowia lipolytica CLIB122]	YALI0_E26719g	YALI0E26719g	2912306
gene2201	25.2551	2.09963	48.4106	23.0568	4.52712	3.49834e-18	8.59122e-18	NC_006069.1	1022522	1024210	-	1689	YALI0_C07722g	GO:0005887;GO:0006855;GO:0016020;GO:0016021;GO:0055085	K08158	-	YALI0C07722p [Yarrowia lipolytica CLIB122]	YALI0_C07722g	YALI0C07722g	2909773
gene4630	461.334	220.176	702.493	3.19061	1.67383	4.02573e-18	9.87127e-18	NC_006071.1	1476687	1480991	+	4254	YALI0_E12155g	GO:0005089;GO:0035023	-	-	YALI0E12155p [Yarrowia lipolytica CLIB122]	YALI0_E12155g	YALI0E12155g	2912815
gene5803	188.712	109.709	267.716	2.44024	1.28703	4.52466e-18	1.1082e-17	NC_006072.1	436863	437972	-	1110	YALI0_F03157g	GO:0003676	-	-	YALI0F03157p [Yarrowia lipolytica CLIB122]	YALI0_F03157g	YALI0F03157g	2907748
gene4586	119.018	47.142	190.895	4.04936	2.01769	5.17797e-18	1.26724e-17	NC_006071.1	1371815	1373158	+	1344	YALI0_E11209g	-	-	-	YALI0E11209p [Yarrowia lipolytica CLIB122]	YALI0_E11209g	YALI0E11209g	2912742
gene1408	148.88	80.9157	216.845	2.67989	1.42217	1.16667e-17	2.84015e-17	NC_006068.1	1803036	1804778	+	1743	YALI0_B13376g	GO:0000077;GO:0000790;GO:0003682;GO:0003689;GO:0005634;GO:0006281;GO:0033314	K06662	-	YALI0B13376p [Yarrowia lipolytica CLIB122]	YALI0_B13376g	YALI0B13376g	2907525
gene5313	47.6703	12.8344	82.5062	6.4285	2.68448	1.16669e-17	2.84015e-17	NC_006071.1	3264045	3266150	-	2106	YALI0_E27654g	GO:0003997;GO:0005504;GO:0005777;GO:0006631;GO:0006635;GO:0016627;GO:0033540;GO:0050660;GO:0055088;GO:0055114;GO:0071949	-	-	YALI0E27654p [Yarrowia lipolytica CLIB122]	YALI0_E27654g	YALI0E27654g	2911586
gene4515	59.3226	19.6351	99.01	5.0425	2.33414	1.58951e-17	3.85776e-17	NC_006071.1	1171740	1172162	+	423	YALI0_E09647g	-	-	-	YALI0E09647p [Yarrowia lipolytica CLIB122]	YALI0_E09647g	YALI0E09647g	2912561
gene4039	395.972	262.16	529.784	2.02084	1.01495	1.64127e-17	3.98186e-17	NC_006070.1	3471417	3471923	-	507	YALI0_D26125g	GO:0004725;GO:0005737;GO:0016311;GO:0016791;GO:0035335	K18044	-	YALI0D26125p [Yarrowia lipolytica CLIB122]	YALI0_D26125g	YALI0D26125g	2910223
gene3014	224.81	139.069	310.551	2.23307	1.15903	1.94576e-17	4.7099e-17	NC_006070.1	262480	263523	+	1044	YALI0_D02277g	GO:0004802;GO:0005634;GO:0005829;GO:0006098	-	-	YALI0D02277p [Yarrowia lipolytica CLIB122]	YALI0_D02277g	YALI0D02277g	2910520
gene3713	129.122	55.1694	203.074	3.68091	1.88006	2.90225e-17	6.99614e-17	NC_006070.1	2298002	2299540	+	1539	YALI0_D18359g	GO:0005887;GO:0016020;GO:0016021;GO:0055085	-	-	YALI0D18359p [Yarrowia lipolytica CLIB122]	YALI0_D18359g	YALI0D18359g	2911113
gene9	287.979	189.741	386.217	2.03549	1.02538	3.71277e-17	8.92984e-17	NC_006067.1	33576	34226	-	651	YALI0_A00330g	GO:0005634;GO:0005654;GO:0005737;GO:0006470;GO:0008138;GO:0016311;GO:0032091;GO:0043086;GO:0062026;GO:0070372;GO:1990444	K18042	-	YALI0A00330p [Yarrowia lipolytica CLIB122]	YALI0_A00330g	YALI0A00330g	2906599
gene2782	113.273	56.1046	170.442	3.03794	1.60309	4.6966e-17	1.1275e-16	NC_006069.1	2876763	2878028	+	1266	YALI0_C21516g	-	K01045	-	YALI0C21516p [Yarrowia lipolytica CLIB122]	YALI0_C21516g	YALI0C21516g	2909850
gene596	232.09	145.999	318.181	2.17934	1.12389	6.37178e-17	1.52509e-16	NC_006067.1	1589348	1589887	+	540	YALI0_A15444g	GO:0008080	-	-	YALI0A15444p [Yarrowia lipolytica CLIB122]	YALI0_A15444g	YALI0A15444g	2906160
gene5980	100.662	47.4896	153.834	3.23932	1.69569	6.56935e-17	1.57121e-16	NC_006072.1	1022359	1023333	+	975	YALI0_F06974g	GO:0004032;GO:0005829;GO:0008106;GO:0016491;GO:0055114	-	-	YALI0F06974p [Yarrowia lipolytica CLIB122]	YALI0_F06974g	YALI0F06974g	2908476
gene7006	315.799	179.676	451.921	2.5152	1.33067	6.79434e-17	1.62441e-16	NC_006072.1	3793658	3796207	+	2550	YALI0_F30371g	GO:0031932;GO:0038203	-	-	YALI0F30371p [Yarrowia lipolytica CLIB122]	YALI0_F30371g	YALI0F30371g	2908557
gene1913	32.8223	1.75712	63.8874	36.3591	5.18424	9.30854e-17	2.22055e-16	NC_006069.1	149321	149752	+	432	YALI0_C01089g	-	-	-	YALI0C01089p [Yarrowia lipolytica CLIB122]	YALI0_C01089g	YALI0C01089g	2909154
gene2487	823.008	518.299	1127.72	2.1758	1.12155	1.14856e-16	2.73379e-16	NC_006069.1	2006817	2007365	+	549	YALI0_C14586g	GO:0000166;GO:0003924;GO:0005525;GO:0005737;GO:0006886;GO:0016192	K07941	-	YALI0C14586p [Yarrowia lipolytica CLIB122]	YALI0_C14586g	YALI0C14586g	2910066
gene1176	34.3564	6.54293	62.1699	9.50184	3.24821	1.33803e-16	3.17535e-16	NC_006068.1	1074176	1075216	-	1041	YALI0_B08052g	GO:0003824;GO:0016491;GO:0016616;GO:0050662;GO:0055114	-	-	YALI0B08052p [Yarrowia lipolytica CLIB122]	YALI0_B08052g	YALI0B08052g	2907000
gene3471	283.182	138.781	427.583	3.08098	1.62339	1.34082e-16	3.18078e-16	NC_006070.1	1559689	1561026	+	1338	YALI0_D12496g	GO:0016020;GO:0016021;GO:0043085	-	-	YALI0D12496p [Yarrowia lipolytica CLIB122]	YALI0_D12496g	YALI0D12496g	2910142
gene4708	1038.16	664.321	1411.99	2.12546	1.08778	1.68288e-16	3.98784e-16	NC_006071.1	1681783	1683681	-	1899	YALI0_E13970g	GO:0004843;GO:0005829;GO:0016807;GO:0071108;GO:1990380	K01309	[EC:3.4.19.12]	YALI0E13970p [Yarrowia lipolytica CLIB122]	YALI0_E13970g	YALI0E13970g	2911493
gene3456	547.017	327.017	767.016	2.34549	1.22989	3.49357e-16	8.2118e-16	NC_006070.1	1512727	1514538	-	1812	YALI0_D12166g	GO:0000784;GO:0003684;GO:0006303;GO:0031848;GO:0035312;GO:0036297;GO:0090305	K15340	-	YALI0D12166p [Yarrowia lipolytica CLIB122]	YALI0_D12166g	YALI0D12166g	2910615
gene4907	398.517	234.488	562.546	2.39904	1.26246	3.60938e-16	8.47783e-16	NC_006071.1	2214823	2217999	+	3177	YALI0_E18612g	GO:0000149;GO:0005085;GO:0005515;GO:0005769;GO:0005770;GO:0005829;GO:0005886;GO:0017137;GO:0030133;GO:0035091;GO:0045022;GO:0097422;GO:1990126	-	-	YALI0E18612p [Yarrowia lipolytica CLIB122]	YALI0_E18612g	YALI0E18612g	2911724
gene3241	644.671	239.362	1049.98	4.38658	2.1331	4.45104e-16	1.04318e-15	NC_006070.1	963230	966529	-	3300	YALI0_D07524g	GO:0005096;GO:0005768;GO:0005802;GO:0006891;GO:0043547;GO:0046872	K12488	-	YALI0D07524p [Yarrowia lipolytica CLIB122]	YALI0_D07524g	YALI0D07524g	2910898
gene260	166.648	97.6417	235.655	2.41346	1.27111	4.92203e-16	1.15146e-15	NC_006067.1	650185	651276	-	1092	YALI0_A06677g	-	-	-	YALI0A06677p [Yarrowia lipolytica CLIB122]	YALI0_A06677g	YALI0A06677g	2906163
gene164	278.385	164.069	392.701	2.39351	1.25913	9.51514e-16	2.21388e-15	NC_006067.1	453438	454604	-	1167	YALI0_A04191g	GO:0005515	-	-	YALI0A04191p [Yarrowia lipolytica CLIB122]	YALI0_A04191g	YALI0A04191g	2906234
gene2921	484.298	316.566	652.03	2.05969	1.04243	9.70374e-16	2.25694e-15	NC_006070.1	14165	14446	-	282	YALI0_D00154g	GO:0016020;GO:0016021	-	-	YALI0D00154p [Yarrowia lipolytica CLIB122]	YALI0_D00154g	YALI0D00154g	2910371
gene5966	215.414	136.646	294.181	2.15286	1.10625	1.54537e-15	3.571e-15	NC_006072.1	981553	983193	-	1641	YALI0_F06666g	GO:0003677;GO:0005515	K10301	-	YALI0F06666p [Yarrowia lipolytica CLIB122]	YALI0_F06666g	YALI0F06666g	2908516
gene2500	92.2137	43.9916	140.436	3.19234	1.67461	2.0817e-15	4.79479e-15	NC_006069.1	2045376	2048381	-	3006	YALI0_C14872g	GO:0016020;GO:0016021	-	-	YALI0C14872p [Yarrowia lipolytica CLIB122]	YALI0_C14872g	YALI0C14872g	2909339
gene6020	231.783	118.886	344.68	2.89924	1.53568	3.15373e-15	7.24319e-15	NC_006072.1	1125980	1126975	+	930	YALI0_F07887g	GO:0005515	K13137	-	YALI0F07887p [Yarrowia lipolytica CLIB122]	YALI0_F07887g	YALI0F07887g	2908375
gene2730	67.0114	27.162	106.861	3.93421	1.97607	3.84828e-15	8.82575e-15	NC_006069.1	2744926	2746083	-	1158	YALI0_C20273g	GO:0004190;GO:0005576;GO:0006508;GO:0008233;GO:0009277;GO:0016787;GO:0030163;GO:0031505	-	-	YALI0C20273p [Yarrowia lipolytica CLIB122]	YALI0_C20273g	YALI0C20273g	2909905
gene6059	354.718	156.046	553.39	3.54632	1.82632	3.98785e-15	9.14256e-15	NC_006072.1	1221541	1225230	-	3690	YALI0_F08789g	GO:0000155;GO:0000160;GO:0004673;GO:0005887;GO:0007165;GO:0009927;GO:0016020;GO:0016021;GO:0016310;GO:0016772;GO:0018106;GO:0023014;GO:0046777	K11231	[EC:2.7.13.3]	YALI0F08789p [Yarrowia lipolytica CLIB122]	YALI0_F08789g	YALI0F08789g	2907874
gene3552	85.0627	39.3151	130.81	3.32722	1.73432	4.01757e-15	9.20741e-15	NC_006070.1	1764490	1766205	-	1716	YALI0_D14498g	GO:0005886;GO:0016020;GO:0016021	-	-	YALI0D14498p [Yarrowia lipolytica CLIB122]	YALI0_D14498g	YALI0D14498g	2910244
gene2540	48.9981	12.2329	85.7633	7.0109	2.8096	4.67805e-15	1.07096e-14	NC_006069.1	2241754	2241903	+	150	YALI0_C15785g	-	-	-	YALI0C15785p [Yarrowia lipolytica CLIB122]	YALI0_C15785g	YALI0C15785g	2909437
gene6147	2210.93	1196.91	3224.95	2.69439	1.42996	4.86832e-15	1.11412e-14	NC_006072.1	1449289	1451391	+	2103	YALI0_F10857g	GO:0003997;GO:0005504;GO:0005777;GO:0006629;GO:0006631;GO:0006635;GO:0016491;GO:0016627;GO:0033540;GO:0050660;GO:0055088;GO:0055114;GO:0071949	K00232	[EC:1.3.3.6]	YALI0F10857p [Yarrowia lipolytica CLIB122]	YALI0_F10857g	YALI0F10857g	2907872
gene246	226.918	147.376	306.46	2.07944	1.05619	6.14272e-15	1.40377e-14	NC_006067.1	618269	619201	+	933	YALI0_A06347g	GO:0005515	-	-	YALI0A06347p [Yarrowia lipolytica CLIB122]	YALI0_A06347g	YALI0A06347g	2905796
gene6648	28.9588	5.35989	52.5577	9.80573	3.29363	1.08712e-14	2.4659e-14	NC_006072.1	2914599	2915318	-	720	YALI0_F22011g	-	-	-	YALI0F22011p [Yarrowia lipolytica CLIB122]	YALI0_F22011g	YALI0F22011g	2908839
gene5562	79.8155	36.5346	123.096	3.36931	1.75245	1.22822e-14	2.78301e-14	NC_006071.1	3897102	3899135	+	2034	YALI0_E32835g	GO:0003997;GO:0005777;GO:0006631;GO:0006635;GO:0016627;GO:0050660;GO:0055114;GO:0071949	K00232	[EC:1.3.3.6]	YALI0E32835p [Yarrowia lipolytica CLIB122]	YALI0_E32835g	YALI0E32835g	2912003
gene6282	40.6684	11.5328	69.804	6.05264	2.59756	1.4936e-14	3.37599e-14	NC_006072.1	1881552	1884176	+	2625	YALI0_F13959g	GO:0005887;GO:0016020;GO:0016021;GO:0035672;GO:0035673;GO:0055085	-	-	YALI0F13959p [Yarrowia lipolytica CLIB122]	YALI0_F13959g	YALI0F13959g	2908181
gene6901	4725.23	1322.2	8128.27	6.14755	2.62001	1.83538e-14	4.14122e-14	NC_006072.1	3533738	3537634	+	3897	YALI0_F27753g	GO:0005515;GO:0005739;GO:0031966	-	-	YALI0F27753p [Yarrowia lipolytica CLIB122]	YALI0_F27753g	YALI0F27753g	2907901
gene6272	140.429	80.9788	199.879	2.46828	1.30351	2.0088e-14	4.52933e-14	NC_006072.1	1832584	1836391	+	3063	YALI0_F13673g	GO:0005085;GO:0005089;GO:0035023;GO:0035556	-	-	YALI0F13673p [Yarrowia lipolytica CLIB122]	YALI0_F13673g	YALI0F13673g	2908318
gene1122	284.653	168.428	400.878	2.38012	1.25103	2.74594e-14	6.17403e-14	NC_006068.1	894132	894911	-	780	YALI0_B06688g	-	-	-	YALI0B06688p [Yarrowia lipolytica CLIB122]	YALI0_B06688g	YALI0B06688g	2907595
gene6937	214.632	83.0323	346.231	4.16983	2.05999	3.49943e-14	7.84073e-14	NC_006072.1	3629019	3629831	-	813	YALI0_F28567g	GO:0003824;GO:0004165;GO:0004300;GO:0005777;GO:0006635	-	-	YALI0F28567p [Yarrowia lipolytica CLIB122]	YALI0_F28567g	YALI0F28567g	2908537
gene6167	537.833	169.669	905.997	5.3398	2.41679	3.95047e-14	8.83282e-14	NC_006072.1	1497595	1500333	-	2739	YALI0_F11319g	-	-	-	YALI0F11319p [Yarrowia lipolytica CLIB122]	YALI0_F11319g	YALI0F11319g	2909017
gene3576	215.005	124.475	305.534	2.45458	1.29548	4.93787e-14	1.10175e-13	NC_006070.1	1837806	1838156	+	351	YALI0_D15092g	GO:0000151;GO:0046872	-	-	YALI0D15092p [Yarrowia lipolytica CLIB122]	YALI0_D15092g	YALI0D15092g	2910745
gene3547	276.756	138.711	414.801	2.99039	1.58034	7.25598e-14	1.60946e-13	NC_006070.1	1752010	1753242	+	1233	YALI0_D14388g	GO:0005515	-	-	YALI0D14388p [Yarrowia lipolytica CLIB122]	YALI0_D14388g	YALI0D14388g	2910239
gene4760	66.4505	28.6687	104.232	3.63575	1.86225	1.04561e-13	2.30574e-13	NC_006071.1	1809097	1810863	+	1767	YALI0_E15147g	-	-	-	YALI0E15147p [Yarrowia lipolytica CLIB122]	YALI0_E15147g	YALI0E15147g	2911547
gene37	152.436	91.5803	213.291	2.32901	1.21971	1.61994e-13	3.55267e-13	NC_006067.1	121983	122435	-	453	YALI0_A00957g	GO:0008080	-	-	YALI0A00957p [Yarrowia lipolytica CLIB122]	YALI0_A00957g	YALI0A00957g	2906313
gene2979	508.309	320.446	696.171	2.1725	1.11936	1.76724e-13	3.87176e-13	NC_006070.1	167609	169807	+	2199	YALI0_D01441g	-	-	-	YALI0D01441p [Yarrowia lipolytica CLIB122]	YALI0_D01441g	YALI0D01441g	2910459
gene4077	1608.56	1017.45	2199.66	2.16193	1.11232	4.2652e-13	9.24656e-13	NC_006070.1	3585935	3589816	+	3882	YALI0_D26972g	GO:0000122;GO:0000790;GO:0003677;GO:0003682;GO:0005515;GO:0005634;GO:0008134;GO:0016491;GO:0034648;GO:0034720;GO:0045944;GO:0050660;GO:0055114	K11450	[EC:1.14.99.66]	YALI0D26972p [Yarrowia lipolytica CLIB122]	YALI0_D26972g	YALI0D26972g	2911237
gene2314	37.7878	11.2477	64.3279	5.71919	2.51581	5.08592e-13	1.09961e-12	NC_006069.1	1436274	1439366	-	2493	YALI0_C10311g	GO:0006813;GO:0015079;GO:0016020;GO:0016021;GO:0071805	-	-	YALI0C10311p [Yarrowia lipolytica CLIB122]	YALI0_C10311g	YALI0C10311g	2909465
gene1376	144.935	87.8148	202.056	2.30093	1.20222	5.4017e-13	1.16631e-12	NC_006068.1	1687173	1688702	+	1530	YALI0_B12606g	-	-	-	YALI0B12606p [Yarrowia lipolytica CLIB122]	YALI0_B12606g	YALI0B12606g	2907053
gene3733	33.4723	8.88661	58.058	6.5332	2.70779	5.87926e-13	1.26814e-12	NC_006070.1	2375899	2376876	-	978	YALI0_D18832g	GO:0005515	-	-	YALI0D18832p [Yarrowia lipolytica CLIB122]	YALI0_D18832g	YALI0D18832g	2911140
gene5732	524.341	251.227	797.456	3.17425	1.66641	8.64362e-13	1.85443e-12	NC_006072.1	243494	246427	+	2934	YALI0_F01562g	GO:0000981;GO:0003677;GO:0005634;GO:0006351;GO:0006355;GO:0006357;GO:0008270	-	-	YALI0F01562p [Yarrowia lipolytica CLIB122]	YALI0_F01562g	YALI0F01562g	2908057
gene4330	50.5505	19.4396	81.6614	4.20078	2.07066	9.51254e-13	2.03813e-12	NC_006071.1	580981	582282	-	1302	YALI0_E05313g	GO:0005887;GO:0016020;GO:0016021;GO:0055085;GO:0071627	-	-	YALI0E05313p [Yarrowia lipolytica CLIB122]	YALI0_E05313g	YALI0E05313g	2912310
gene2040	12.1944	0	24.3888	Inf	Inf	9.64215e-13	2.06521e-12	NC_006069.1	533991	535283	-	1293	YALI0_C04048g	GO:0005515	-	-	YALI0C04048p [Yarrowia lipolytica CLIB122]	YALI0_C04048g	YALI0C04048g	2909680
gene2059	122.169	70.9441	173.394	2.44408	1.28929	1.30718e-12	2.78584e-12	NC_006069.1	596140	597780	-	1641	YALI0_C04477g	GO:0005887;GO:0006855;GO:0016020;GO:0016021;GO:0055085	-	-	YALI0C04477p [Yarrowia lipolytica CLIB122]	YALI0_C04477g	YALI0C04477g	2909648
gene5602	157.205	98.3825	216.028	2.1958	1.13474	1.69711e-12	3.60489e-12	NC_006071.1	4001836	4004190	-	2355	YALI0_E33715g	GO:0000712;GO:0000790;GO:0005634;GO:0006281;GO:0006302;GO:0008821;GO:0031297;GO:0031573;GO:0048476	-	-	YALI0E33715p [Yarrowia lipolytica CLIB122]	YALI0_E33715g	YALI0E33715g	2912467
gene3401	138.116	83.5828	192.65	2.30489	1.2047	1.74371e-12	3.70264e-12	NC_006070.1	1369633	1370415	-	783	YALI0_D10945g	-	-	-	YALI0D10945p [Yarrowia lipolytica CLIB122]	YALI0_D10945g	YALI0D10945g	2910718
gene2812	73.7171	35.4955	111.939	3.1536	1.657	1.91677e-12	4.06743e-12	NC_006069.1	2956483	2959278	+	2796	YALI0_C22143g	GO:0016020;GO:0016021	-	-	YALI0C22143p [Yarrowia lipolytica CLIB122]	YALI0_C22143g	YALI0C22143g	2909686
gene3346	602.064	280.843	923.285	3.28755	1.71701	3.31046e-12	6.97872e-12	NC_006070.1	1240044	1241648	+	1605	YALI0_D09801g	GO:0005887;GO:0016020;GO:0016021;GO:0055085	-	-	YALI0D09801p [Yarrowia lipolytica CLIB122]	YALI0_D09801g	YALI0D09801g	2910922
gene2566	125.63	74.7326	176.527	2.36212	1.24008	3.48383e-12	7.33937e-12	NC_006069.1	2324805	2326478	-	1023	YALI0_C16500g	GO:0005634;GO:0006357;GO:0070449	K15077	-	YALI0C16500p [Yarrowia lipolytica CLIB122]	YALI0_C16500g	YALI0C16500g	2909750
gene3836	813.541	435.878	1191.2	2.73288	1.45042	3.89018e-12	8.17932e-12	NC_006070.1	2683597	2685033	-	1437	YALI0_D21230g	GO:0000278;GO:0003677;GO:0005634;GO:0045893	K09425	-	YALI0D21230p [Yarrowia lipolytica CLIB122]	YALI0_D21230g	YALI0D21230g	2910153
gene77	16.6143	1.4782	31.7505	21.4792	4.42487	4.38422e-12	9.19096e-12	NC_006067.1	249819	251375	+	1557	YALI0_A01980g	GO:0003682;GO:0005515;GO:0006302;GO:0007062;GO:0008278	-	-	YALI0A01980p [Yarrowia lipolytica CLIB122]	YALI0_A01980g	YALI0A01980g	2905738
gene374	190.362	126.227	254.498	2.0162	1.01164	5.06889e-12	1.06124e-11	NC_006067.1	945489	949859	+	4371	YALI0_A09537g	GO:0005515	-	-	YALI0A09537p [Yarrowia lipolytica CLIB122]	YALI0_A09537g	YALI0A09537g	2905821
gene298	35.6433	11.0761	60.2105	5.43607	2.44256	5.68556e-12	1.18957e-11	NC_006067.1	730865	733021	-	2157	YALI0_A07601g	GO:0016020;GO:0016021	-	-	YALI0A07601p [Yarrowia lipolytica CLIB122]	YALI0_A07601g	YALI0A07601g	2906094
gene1582	166.384	106.784	225.984	2.11628	1.08153	6.09605e-12	1.27255e-11	NC_006068.1	2260004	2260660	+	657	YALI0_B17204g	GO:0005783;GO:0006696	K09829	[EC:5.-.-.-]	YALI0B17204p [Yarrowia lipolytica CLIB122]	YALI0_B17204g	YALI0B17204g	2906679
gene1734	80.2257	41.066	119.385	2.90716	1.53961	7.82609e-12	1.62999e-11	NC_006068.1	2719007	2719873	-	867	YALI0_B20636g	GO:0016787	-	-	YALI0B20636p [Yarrowia lipolytica CLIB122]	YALI0_B20636g	YALI0B20636g	2907397
gene97	19.9799	2.9639	36.996	12.4822	3.6418	8.81333e-12	1.83323e-11	NC_006067.1	305061	305225	+	165	YALI0_A02423g	GO:0005507;GO:0046872	-	-	YALI0A02423p [Yarrowia lipolytica CLIB122]	YALI0_A02423g	YALI0A02423g	7009337
gene550	17.792	0.911625	34.6723	38.0335	5.2492	9.73256e-12	2.01985e-11	NC_006067.1	1445929	1446867	+	939	YALI0_A14256g	-	-	-	YALI0A14256p [Yarrowia lipolytica CLIB122]	YALI0_A14256g	YALI0A14256g	2906148
gene5476	150.192	91.739	208.645	2.27434	1.18544	1.11023e-11	2.30114e-11	NC_006071.1	3674292	3675041	-	750	YALI0_E31174g	-	-	-	YALI0E31174p [Yarrowia lipolytica CLIB122]	YALI0_E31174g	YALI0E31174g	2911445
gene2728	36.9713	12.2316	61.7109	5.04519	2.33491	1.48102e-11	3.0588e-11	NC_006069.1	2734373	2735389	-	1017	YALI0_C20251g	GO:0003824;GO:0016491;GO:0016616;GO:0050662;GO:0055114	-	-	YALI0C20251p [Yarrowia lipolytica CLIB122]	YALI0_C20251g	YALI0C20251g	2909903
gene6482	92.7716	51.07	134.473	2.63312	1.39677	1.73408e-11	3.57341e-11	NC_006072.1	2435835	2437085	+	1251	YALI0_F18326g	GO:0016020;GO:0016021	-	-	YALI0F18326p [Yarrowia lipolytica CLIB122]	YALI0_F18326g	YALI0F18326g	2907807
gene1233	45.8824	17.8605	73.9043	4.13785	2.04888	1.76684e-11	3.63974e-11	NC_006068.1	1271572	1272687	+	1116	YALI0_B09361g	GO:0006629;GO:0016787	-	-	YALI0B09361p [Yarrowia lipolytica CLIB122]	YALI0_B09361g	YALI0B09361g	2907631
gene5946	177.821	117.769	237.873	2.01984	1.01424	1.79837e-11	3.7031e-11	NC_006072.1	932794	934060	-	627	YALI0_F06270g	GO:0005634;GO:0071171;GO:1902979	-	-	YALI0F06270p [Yarrowia lipolytica CLIB122]	YALI0_F06270g	YALI0F06270g	2908420
gene1880	21.5211	3.89538	39.1469	10.0496	3.32906	1.88078e-11	3.87074e-11	NC_006069.1	36743	37981	+	1239	YALI0_C00341g	-	-	-	YALI0C00341p [Yarrowia lipolytica CLIB122]	YALI0_C00341g	YALI0C00341g	2909198
gene1615	88.532	48.1023	128.962	2.68099	1.42277	2.20506e-11	4.5294e-11	NC_006068.1	2341224	2342540	-	1317	YALI0_B17908g	GO:0005515	K14708	-	YALI0B17908p [Yarrowia lipolytica CLIB122]	YALI0_B17908g	YALI0B17908g	2906988
gene504	135.548	84.1605	186.935	2.22117	1.15132	2.44758e-11	5.02114e-11	NC_006067.1	1333396	1334358	-	963	YALI0_A12969g	GO:0005634;GO:0006281;GO:0006310;GO:0006974;GO:0030915;GO:2001022	K22825	-	YALI0A12969p [Yarrowia lipolytica CLIB122]	YALI0_A12969g	YALI0A12969g	2906389
gene1822	57.0197	25.7347	88.3046	3.43134	1.77877	3.29252e-11	6.72654e-11	NC_006068.1	2962213	2963313	-	1101	YALI0_B22506g	GO:0005737;GO:0008863;GO:0016491;GO:0016616;GO:0042183;GO:0051287;GO:0055114	K00122	[EC:1.17.1.9]	YALI0B22506p [Yarrowia lipolytica CLIB122]	YALI0_B22506g	YALI0B22506g	2907419
gene1833	61.3234	28.7511	93.8957	3.26582	1.70744	3.43361e-11	7.0081e-11	NC_006068.1	2991143	2992510	-	1368	YALI0_B22748g	-	-	-	YALI0B22748p [Yarrowia lipolytica CLIB122]	YALI0_B22748g	YALI0B22748g	2907171
gene2582	887.322	554.829	1219.82	2.19854	1.13655	4.21205e-11	8.57783e-11	NC_006069.1	2375975	2377714	-	1740	YALI0_C16863g	GO:0003677;GO:0003700;GO:0006355	K09051	-	YALI0C16863p [Yarrowia lipolytica CLIB122]	YALI0_C16863g	YALI0C16863g	2909301
gene2688	15.1768	1.48316	28.8705	19.4655	4.28285	8.35213e-11	1.6854e-10	NC_006069.1	2642931	2644133	-	1203	YALI0_C19360g	-	-	-	YALI0C19360p [Yarrowia lipolytica CLIB122]	YALI0_C19360g	YALI0C19360g	2909934
gene4863	121.466	74.8045	168.127	2.24755	1.16835	1.16649e-10	2.33773e-10	NC_006071.1	2072566	2074503	+	1938	YALI0_E17611g	-	-	-	YALI0E17611p [Yarrowia lipolytica CLIB122]	YALI0_E17611g	YALI0E17611g	2911678
gene1553	89.1307	49.9292	128.332	2.57029	1.36193	1.18162e-10	2.3673e-10	NC_006068.1	2181861	2182774	+	729	YALI0_B16566g	GO:0002953;GO:0016311	K07023	-	YALI0B16566p [Yarrowia lipolytica CLIB122]	YALI0_B16566g	YALI0B16566g	2907386
gene4789	690.054	445.094	935.013	2.10071	1.07088	1.87593e-10	3.72342e-10	NC_006071.1	1892444	1893574	-	1131	YALI0_E15862g	-	-	-	YALI0E15862p [Yarrowia lipolytica CLIB122]	YALI0_E15862g	YALI0E15862g	2911566
gene272	93.2296	53.355	133.104	2.49469	1.31886	1.88264e-10	3.7356e-10	NC_006067.1	675572	675874	+	303	YALI0_A06952g	-	-	-	YALI0A06952p [Yarrowia lipolytica CLIB122]	YALI0_A06952g	YALI0A06952g	2906602
gene2195	80.8058	44.0784	117.533	2.66646	1.41492	2.14013e-10	4.23342e-10	NC_006069.1	997905	999158	-	1254	YALI0_C07590g	GO:0005886;GO:0015103;GO:0015104;GO:0015105;GO:0015297;GO:0015699;GO:0015700;GO:0016020;GO:0016021;GO:0055085	K03325	-	YALI0C07590p [Yarrowia lipolytica CLIB122]	YALI0_C07590g	YALI0C07590g	2910033
gene5238	77.5529	41.6599	113.446	2.72314	1.44527	2.19051e-10	4.3304e-10	NC_006071.1	3083273	3084844	-	1572	YALI0_E25982g	GO:0004497;GO:0005506;GO:0016491;GO:0016705;GO:0016712;GO:0020037;GO:0046872;GO:0055114	-	-	YALI0E25982p [Yarrowia lipolytica CLIB122]	YALI0_E25982g	YALI0E25982g	2912619
gene560	135.749	87.0524	184.445	2.11878	1.08323	2.74146e-10	5.40792e-10	NC_006067.1	1466479	1467807	+	1329	YALI0_A14520g	-	-	-	YALI0A14520p [Yarrowia lipolytica CLIB122]	YALI0_A14520g	YALI0A14520g	2906425
gene2285	239.923	158.932	320.913	2.01919	1.01377	4.90077e-10	9.5908e-10	NC_006069.1	1309626	1312265	+	2640	YALI0_C09614g	GO:0000790;GO:0006270;GO:0031261	-	-	YALI0C09614p [Yarrowia lipolytica CLIB122]	YALI0_C09614g	YALI0C09614g	2909787
gene2861	55.3721	26.5392	84.205	3.17286	1.66578	7.74132e-10	1.50169e-09	NC_006069.1	3112467	3113513	+	1047	YALI0_C23224g	GO:0003824	K08726	-	YALI0C23224p [Yarrowia lipolytica CLIB122]	YALI0_C23224g	YALI0C23224g	2909628
gene2649	46.3677	20.3078	72.4276	3.5665	1.83451	7.90924e-10	1.53288e-09	NC_006069.1	2537010	2537174	+	165	YALI0_C18481g	GO:0005507;GO:0046872	-	-	YALI0C18481p [Yarrowia lipolytica CLIB122]	YALI0_C18481g	YALI0C18481g	7009465
gene1599	178.376	85.2615	271.49	3.18421	1.67093	8.3427e-10	1.61591e-09	NC_006068.1	2297169	2299130	+	1962	YALI0_B17556g	GO:0004672;GO:0004674;GO:0005524;GO:0005634;GO:0005737;GO:0006468;GO:0035556	K07359	[EC:2.7.11.17]	YALI0B17556p [Yarrowia lipolytica CLIB122]	YALI0_B17556g	YALI0B17556g	2907228
gene4703	33.4644	11.8654	55.0635	4.64067	2.21433	8.99572e-10	1.74082e-09	NC_006071.1	1667693	1668829	+	1137	YALI0_E13860g	GO:0000324;GO:0004190;GO:0006508;GO:0008233;GO:0016787;GO:0030163;GO:0051603	-	-	YALI0E13860p [Yarrowia lipolytica CLIB122]	YALI0_E13860g	YALI0E13860g	2911488
gene1930	102.868	62.3925	143.343	2.29745	1.20003	9.30311e-10	1.79868e-09	NC_006069.1	209224	210756	+	1533	YALI0_C01485g	GO:0000030;GO:0005783;GO:0005789;GO:0006506;GO:0016020;GO:0016021;GO:0016740;GO:0016757;GO:0097502	K08098	[EC:2.4.1.-]	YALI0C01485p [Yarrowia lipolytica CLIB122]	YALI0_C01485g	YALI0C01485g	2909128
gene3474	197.734	97.1188	298.349	3.072	1.61918	9.9156e-10	1.91421e-09	NC_006070.1	1569259	1572555	+	3297	YALI0_D12562g	GO:0005524	-	-	YALI0D12562p [Yarrowia lipolytica CLIB122]	YALI0_D12562g	YALI0D12562g	2910145
gene14	450.153	214.003	686.302	3.20697	1.68121	1.09808e-09	2.11666e-09	NC_006067.1	48941	50560	-	1620	YALI0_A00418g	GO:0005887;GO:0016020;GO:0016021;GO:0055085;GO:0071627	-	-	YALI0A00418p [Yarrowia lipolytica CLIB122]	YALI0_A00418g	YALI0A00418g	2906299
gene6454	13.6722	1.51186	25.8326	17.0866	4.09479	1.5983e-09	3.06158e-09	NC_006072.1	2357106	2358407	-	1302	YALI0_F17732g	GO:0016020;GO:0016021	-	-	YALI0F17732p [Yarrowia lipolytica CLIB122]	YALI0_F17732g	YALI0F17732g	2908642
gene1670	274.01	160.279	387.74	2.41915	1.2745	1.63662e-09	3.13125e-09	NC_006068.1	2527951	2528784	-	834	YALI0_B19096g	GO:0005515	-	-	YALI0B19096p [Yarrowia lipolytica CLIB122]	YALI0_B19096g	YALI0B19096g	2906654
gene2980	665.058	392.228	937.887	2.39118	1.25772	1.64607e-09	3.14744e-09	NC_006070.1	173914	175674	+	1761	YALI0_D01463g	GO:0003676	K21543	-	YALI0D01463p [Yarrowia lipolytica CLIB122]	YALI0_D01463g	YALI0D01463g	2910460
gene1627	71.3004	38.7695	103.831	2.67817	1.42125	1.85488e-09	3.53722e-09	NC_006068.1	2374681	2376708	+	2028	YALI0_B18194g	-	-	-	YALI0B18194p [Yarrowia lipolytica CLIB122]	YALI0_B18194g	YALI0B18194g	2906690
gene4283	103.655	50.2257	157.085	3.12759	1.64505	2.0246e-09	3.854e-09	NC_006071.1	479785	480963	-	1179	YALI0_E04268g	-	-	-	YALI0E04268p [Yarrowia lipolytica CLIB122]	YALI0_E04268g	YALI0E04268g	2912187
gene64	29.8555	10.1756	49.5354	4.86805	2.28334	2.53922e-09	4.81791e-09	NC_006067.1	215891	216946	-	1056	YALI0_A01650g	GO:0005515	-	-	YALI0A01650p [Yarrowia lipolytica CLIB122]	YALI0_A01650g	YALI0A01650g	2906527
gene5253	121.21	78.2982	164.122	2.09612	1.06772	3.24755e-09	6.14372e-09	NC_006071.1	3121093	3121935	-	843	YALI0_E26301g	GO:0003676	K09537	-	YALI0E26301p [Yarrowia lipolytica CLIB122]	YALI0_E26301g	YALI0E26301g	2912370
gene6395	21.3367	5.37867	37.2948	6.93383	2.79365	3.69194e-09	6.97414e-09	NC_006072.1	2194130	2195605	-	1476	YALI0_F16423g	GO:0005886;GO:0005887;GO:0015124;GO:0015719;GO:0016020;GO:0016021;GO:0022857;GO:0031224;GO:0035442;GO:0042938;GO:0042939;GO:0055085;GO:0071916	-	-	YALI0F16423p [Yarrowia lipolytica CLIB122]	YALI0_F16423g	YALI0F16423g	2908879
gene3518	111.518	70.6675	152.368	2.15612	1.10844	4.14302e-09	7.80787e-09	NC_006070.1	1681130	1683919	-	2790	YALI0_D13618g	-	-	-	YALI0D13618p [Yarrowia lipolytica CLIB122]	YALI0_D13618g	YALI0D13618g	2910254
gene6070	132.034	87.8473	176.221	2.006	1.00432	6.15105e-09	1.1511e-08	NC_006072.1	1259867	1261414	-	1548	YALI0_F09031g	-	-	-	YALI0F09031p [Yarrowia lipolytica CLIB122]	YALI0_F09031g	YALI0F09031g	2908100
gene5656	62.8711	33.7249	92.0174	2.72847	1.44809	8.71698e-09	1.62371e-08	NC_006071.1	4159769	4161184	+	1416	YALI0_E34903g	GO:0005887;GO:0016020;GO:0016021;GO:0055085;GO:0071627	-	-	YALI0E34903p [Yarrowia lipolytica CLIB122]	YALI0_E34903g	YALI0E34903g	2912144
gene6091	115.734	74.9879	156.48	2.08673	1.06125	9.05652e-09	1.68647e-08	NC_006072.1	1307726	1308154	+	429	YALI0_F09515g	GO:0016020;GO:0016021	-	-	YALI0F09515p [Yarrowia lipolytica CLIB122]	YALI0_F09515g	YALI0F09515g	2908944
gene1948	113.209	72.9637	153.454	2.10315	1.07255	1.01317e-08	1.88396e-08	NC_006069.1	260779	261777	-	999	YALI0_C01925g	GO:0005515	-	-	YALI0C01925p [Yarrowia lipolytica CLIB122]	YALI0_C01925g	YALI0C01925g	2909095
gene6241	56.9326	29.5031	84.3622	2.85944	1.51573	1.17862e-08	2.1859e-08	NC_006072.1	1750002	1750511	-	510	YALI0_F13035g	GO:0003747;GO:0006415	K15033	[EC:3.1.1.29]	YALI0F13035p [Yarrowia lipolytica CLIB122]	YALI0_F13035g	YALI0F13035g	2909010
gene5309	30.5991	11.3026	49.8956	4.41453	2.14226	1.18682e-08	2.19983e-08	NC_006071.1	3253603	3254766	-	1164	YALI0_E27588g	-	-	-	YALI0E27588p [Yarrowia lipolytica CLIB122]	YALI0_E27588g	YALI0E27588g	2912259
gene4904	284.935	188.52	381.35	2.02287	1.0164	1.42253e-08	2.62612e-08	NC_006071.1	2210078	2210479	+	402	YALI0_E18546g	-	K13993	-	YALI0E18546p [Yarrowia lipolytica CLIB122]	YALI0_E18546g	YALI0E18546g	2911722
gene2306	112.291	72.6251	151.957	2.09235	1.06513	1.46735e-08	2.70808e-08	NC_006069.1	1402141	1403376	+	1236	YALI0_C10135g	GO:0004190;GO:0005576;GO:0006508;GO:0008233;GO:0009277;GO:0016787;GO:0030163;GO:0031505	-	-	YALI0C10135p [Yarrowia lipolytica CLIB122]	YALI0_C10135g	YALI0C10135g	7009445
gene2648	22.9897	6.83929	39.1402	5.72284	2.51673	1.71109e-08	3.15066e-08	NC_006069.1	2535946	2536113	-	168	YALI0_C18475g	GO:0005507;GO:0046872	-	-	YALI0C18475p [Yarrowia lipolytica CLIB122]	YALI0_C18475g	YALI0C18475g	7009464
gene2046	719.15	478.851	959.449	2.00365	1.00263	2.70744e-08	4.95116e-08	NC_006069.1	557590	560457	+	2868	YALI0_C04180g	GO:0004435;GO:0005509;GO:0006629;GO:0007165;GO:0008081;GO:0016042;GO:0016787;GO:0032959;GO:0035556;GO:0048015	K05857	[EC:3.1.4.11]	YALI0C04180p [Yarrowia lipolytica CLIB122]	YALI0_C04180g	YALI0C04180g	2909392
gene1616	163.097	86.8421	239.352	2.75618	1.46267	2.82843e-08	5.16507e-08	NC_006068.1	2343620	2346142	-	2523	YALI0_B17930g	GO:0005887;GO:0008271;GO:0008272;GO:0015116;GO:0015301;GO:0016020;GO:0016021;GO:0055085;GO:0098656;GO:1902358	-	-	YALI0B17930p [Yarrowia lipolytica CLIB122]	YALI0_B17930g	YALI0B17930g	2906906
gene1138	25.4746	2.94767	48.0015	16.2845	4.02543	3.77326e-08	6.87674e-08	NC_006068.1	934447	935058	+	612	YALI0_B07029g	GO:0003955;GO:0010181;GO:0016491;GO:0055114	-	-	YALI0B07029p [Yarrowia lipolytica CLIB122]	YALI0_B07029g	YALI0B07029g	2906915
gene6545	23.0926	7.38602	38.7991	5.25305	2.39315	6.37654e-08	1.15224e-07	NC_006072.1	2621456	2622626	-	939	YALI0_F19712g	GO:0005471;GO:0005743;GO:0015866;GO:0015867;GO:0016020;GO:0016021;GO:0022857;GO:0055085	K05863	-	ADP/ATP carrier protein [Yarrowia lipolytica CLIB122]	YALI0_F19712g	YALI0F19712g	2908652
gene4114	58.9166	16.665	101.168	6.07069	2.60186	6.66958e-08	1.2039e-07	NC_006071.1	53347	54861	+	1515	YALI0_E00528g	GO:0006629;GO:0016020;GO:0016021	-	-	YALI0E00528p [Yarrowia lipolytica CLIB122]	YALI0_E00528g	YALI0E00528g	2912882
gene5553	99.3476	64.1482	134.547	2.09744	1.06863	7.5288e-08	1.35518e-07	NC_006071.1	3874299	3875135	-	837	YALI0_E32659g	GO:0031511	-	-	YALI0E32659p [Yarrowia lipolytica CLIB122]	YALI0_E32659g	YALI0E32659g	2911800
gene5487	325.676	157.913	493.439	3.12474	1.64374	1.34289e-07	2.39569e-07	NC_006071.1	3699567	3701774	+	2208	YALI0_E31383g	GO:0000981;GO:0005634;GO:0006355;GO:0006357;GO:0008270	-	-	YALI0E31383p [Yarrowia lipolytica CLIB122]	YALI0_E31383g	YALI0E31383g	2911459
gene5781	99.0657	64.8372	133.294	2.05583	1.03972	1.53538e-07	2.73377e-07	NC_006072.1	391893	394889	-	2997	YALI0_F02673g	GO:0000166;GO:0003774;GO:0003777;GO:0005524;GO:0005634;GO:0005871;GO:0005874;GO:0005876;GO:0007018;GO:0008017;GO:0008574;GO:0016887;GO:0090307	-	-	YALI0F02673p [Yarrowia lipolytica CLIB122]	YALI0_F02673g	YALI0F02673g	2907784
gene2884	200.797	125.193	276.4	2.20778	1.1426	1.63242e-07	2.90413e-07	NC_006069.1	3182694	3183917	+	1224	YALI0_C23727g	GO:0000014;GO:0000403;GO:0000406;GO:0000724;GO:0003684;GO:0003690;GO:0003697;GO:0004519;GO:0005515;GO:0006281;GO:0006289;GO:0010792;GO:0035861;GO:0070336;GO:0090305	-	-	YALI0C23727p [Yarrowia lipolytica CLIB122]	YALI0_C23727g	YALI0C23727g	2909593
gene5565	98.5479	64.3748	132.721	2.06169	1.04383	1.70881e-07	3.03583e-07	NC_006071.1	3918711	3920285	+	1575	YALI0_E32901g	GO:0005886;GO:0015355;GO:0016020;GO:0016021;GO:0022857;GO:0035879;GO:0055085	K08178	-	YALI0E32901p [Yarrowia lipolytica CLIB122]	YALI0_E32901g	YALI0E32901g	2912701
gene3015	96.1757	58.6811	133.67	2.27791	1.18771	1.8768e-07	3.32325e-07	NC_006070.1	268180	270885	+	2706	YALI0_D02299g	-	-	-	YALI0D02299p [Yarrowia lipolytica CLIB122]	YALI0_D02299g	YALI0D02299g	2910521
gene1097	67.7909	40.2454	95.3364	2.36888	1.2442	2.34999e-07	4.14283e-07	NC_006068.1	809360	809836	-	477	YALI0_B06028g	-	-	-	YALI0B06028p [Yarrowia lipolytica CLIB122]	YALI0_B06028g	YALI0B06028g	2907225
gene4152	22.1653	7.39594	36.9346	4.9939	2.32017	2.37688e-07	4.18678e-07	NC_006071.1	153817	154959	-	1143	YALI0_E01364g	GO:0005515;GO:0007165	K04536	-	YALI0E01364p [Yarrowia lipolytica CLIB122]	YALI0_E01364g	YALI0E01364g	2912949
gene157	36.7453	17.3488	56.1417	3.23605	1.69423	3.32074e-07	5.81424e-07	NC_006067.1	439249	441960	+	2712	YALI0_A03949g	GO:0005887;GO:0016020;GO:0016021;GO:0035672;GO:0035673;GO:0055085	-	-	YALI0A03949p [Yarrowia lipolytica CLIB122]	YALI0_A03949g	YALI0A03949g	2906185
gene11	14.0755	3.01997	25.131	8.32161	3.05686	3.44711e-07	6.03056e-07	NC_006067.1	40641	41435	-	795	YALI0_A00369g	GO:0005634;GO:0080009	-	-	YALI0A00369p [Yarrowia lipolytica CLIB122]	YALI0_A00369g	YALI0A00369g	2906297
gene5132	15.5718	2.72361	28.42	10.4347	3.38331	3.55658e-07	6.21361e-07	NC_006071.1	2786513	2786626	+	114	YALI0_E23606g	-	-	-	YALI0E23606p [Yarrowia lipolytica CLIB122]	YALI0_E23606g	YALI0E23606g	2912308
gene129	9.30481	0.900356	17.7093	19.6692	4.29786	4.58678e-07	7.97005e-07	NC_006067.1	367690	368358	-	669	YALI0_A03179g	-	-	-	YALI0A03179p [Yarrowia lipolytica CLIB122]	YALI0_A03179g	YALI0A03179g	2906343
gene2453	46.8766	25.0225	68.7306	2.74675	1.45773	5.70146e-07	9.84561e-07	NC_006069.1	1885929	1886756	-	828	YALI0_C13728g	-	-	-	YALI0C13728p [Yarrowia lipolytica CLIB122]	YALI0_C13728g	YALI0C13728g	2909211
gene6743	11.9821	2.10714	21.857	10.3728	3.37474	5.70406e-07	9.84745e-07	NC_006072.1	3163528	3164646	-	1119	YALI0_F24189g	-	-	-	YALI0F24189p [Yarrowia lipolytica CLIB122]	YALI0_F24189g	YALI0F24189g	2908727
gene1401	55.3188	31.6415	78.9962	2.4966	1.31997	7.03262e-07	1.20923e-06	NC_006068.1	1777539	1779458	-	1920	YALI0_B13200g	GO:0003677;GO:0003700;GO:0005634;GO:0006355	-	-	YALI0B13200p [Yarrowia lipolytica CLIB122]	YALI0_B13200g	YALI0B13200g	2907534
gene5535	89.44	58.7399	120.14	2.04529	1.03231	7.79949e-07	1.33965e-06	NC_006071.1	3828428	3829798	-	1371	YALI0_E32285g	GO:0005515	-	-	YALI0E32285p [Yarrowia lipolytica CLIB122]	YALI0_E32285g	YALI0E32285g	2912603
gene6177	69.0667	38.4883	99.645	2.58897	1.37238	8.77663e-07	1.50386e-06	NC_006072.1	1528839	1530053	+	1215	YALI0_F11539g	-	-	-	YALI0F11539p [Yarrowia lipolytica CLIB122]	YALI0_F11539g	YALI0F11539g	2908603
gene5007	29.0066	12.5805	45.4328	3.61138	1.85255	8.97362e-07	1.5368e-06	NC_006071.1	2471427	2473340	+	1914	YALI0_E20845g	GO:0005615;GO:0008081;GO:0016787	-	-	YALI0E20845p [Yarrowia lipolytica CLIB122]	YALI0_E20845g	YALI0E20845g	2911841
gene5837	536.023	259.945	812.101	3.12413	1.64345	1.09033e-06	1.8608e-06	NC_006072.1	583828	587058	-	3231	YALI0_F03927g	GO:0005783;GO:0005789;GO:0006505;GO:0006888;GO:0015031;GO:0016020;GO:0016021;GO:0016787;GO:0016788;GO:0050185	K05294	[EC:3.-.-.-]	YALI0F03927p [Yarrowia lipolytica CLIB122]	YALI0_F03927g	YALI0F03927g	2907718
gene5358	42.0604	22.0535	62.0674	2.8144	1.49283	1.2512e-06	2.13083e-06	NC_006071.1	3394681	3396840	+	2160	YALI0_E28622g	GO:0005886;GO:0015204;GO:0016020;GO:0016021;GO:0022857;GO:0055085;GO:0071918	K20989	-	YALI0E28622p [Yarrowia lipolytica CLIB122]	YALI0_E28622g	YALI0E28622g	2911623
gene1665	361.814	198.657	524.971	2.64261	1.40196	1.71882e-06	2.90254e-06	NC_006068.1	2505099	2506763	+	1665	YALI0_B18986g	GO:0005887;GO:0016020;GO:0016021;GO:0055085	-	-	YALI0B18986p [Yarrowia lipolytica CLIB122]	YALI0_B18986g	YALI0B18986g	2907552
gene2020	10.6884	1.77831	19.5984	11.0208	3.46216	1.80418e-06	3.04269e-06	NC_006069.1	475558	477669	-	2112	YALI0_C03586g	-	-	-	YALI0C03586p [Yarrowia lipolytica CLIB122]	YALI0_C03586g	YALI0C03586g	2909908
gene2165	5.91547	0	11.8309	Inf	Inf	1.82995e-06	3.08453e-06	NC_006069.1	926500	927006	+	507	YALI0_C06908g	GO:0016020;GO:0016021	-	-	YALI0C06908p [Yarrowia lipolytica CLIB122]	YALI0_C06908g	YALI0C06908g	2909228
gene1194	15.5305	4.47322	26.5877	5.94375	2.57137	2.67567e-06	4.47829e-06	NC_006068.1	1165875	1167518	-	1644	YALI0_B08448g	GO:0005887;GO:0006855;GO:0016020;GO:0016021;GO:0055085	-	-	YALI0B08448p [Yarrowia lipolytica CLIB122]	YALI0_B08448g	YALI0B08448g	2907304
gene5963	63.7258	39.3675	88.0841	2.23749	1.16188	2.75314e-06	4.60435e-06	NC_006072.1	977849	978703	-	855	YALI0_F06600g	-	-	-	YALI0F06600p [Yarrowia lipolytica CLIB122]	YALI0_F06600g	YALI0F06600g	2908080
gene4445	13.5573	2.70362	24.411	9.02901	3.17457	3.43305e-06	5.7151e-06	NC_006071.1	943659	944207	+	549	YALI0_E08074g	GO:0000290;GO:0000340;GO:0000932;GO:0005634;GO:0016787;GO:0050072	-	-	YALI0E08074p [Yarrowia lipolytica CLIB122]	YALI0_E08074g	YALI0E08074g	2912475
gene1237	50.486	29.2527	71.7192	2.45171	1.29379	3.43334e-06	5.7151e-06	NC_006068.1	1288298	1290406	-	2109	YALI0_B09449g	GO:0006302;GO:0035861	-	-	YALI0B09449p [Yarrowia lipolytica CLIB122]	YALI0_B09449g	YALI0B09449g	2907606
gene2258	38.1021	19.9976	56.2066	2.81067	1.49091	4.04756e-06	6.72359e-06	NC_006069.1	1232749	1236846	+	4044	YALI0_C09031g	GO:0007155	-	-	YALI0C09031p [Yarrowia lipolytica CLIB122]	YALI0_C09031g	YALI0C09031g	2909706
gene6802	71.0804	44.278	97.8828	2.21064	1.14447	6.48399e-06	1.07016e-05	NC_006072.1	3288191	3288880	-	690	YALI0_F25575g	GO:0005515	K00799	[EC:2.5.1.18]	YALI0F25575p [Yarrowia lipolytica CLIB122]	YALI0_F25575g	YALI0F25575g	2908373
gene462	5.35479	0	10.7096	Inf	Inf	6.60707e-06	1.08963e-05	NC_006067.1	1240621	1241589	+	969	YALI0_A11803g	-	-	-	YALI0A11803p [Yarrowia lipolytica CLIB122]	YALI0_A11803g	YALI0A11803g	2906392
gene7028	72.0196	47.2416	96.7975	2.04899	1.03491	7.56773e-06	1.24295e-05	NC_006072.1	3848305	3849162	+	858	YALI0_F30833g	GO:0003824;GO:0004099;GO:0005975;GO:0016810;GO:0030476	K01452	[EC:3.5.1.41]	YALI0F30833p [Yarrowia lipolytica CLIB122]	YALI0_F30833g	YALI0F30833g	2907910
gene874	30.0568	14.6413	45.4724	3.10576	1.63495	8.25748e-06	1.35278e-05	NC_006068.1	102187	103176	+	990	YALI0_B00748g	GO:0005515	-	-	YALI0B00748p [Yarrowia lipolytica CLIB122]	YALI0_B00748g	YALI0B00748g	2907444
gene6136	41.258	22.9889	59.5271	2.58939	1.37261	8.97066e-06	1.46849e-05	NC_006072.1	1423688	1425040	+	1353	YALI0_F10549g	GO:0004190;GO:0005576;GO:0006508;GO:0008233;GO:0009277;GO:0016787;GO:0030163;GO:0031505	-	-	YALI0F10549p [Yarrowia lipolytica CLIB122]	YALI0_F10549g	YALI0F10549g	2908965
gene4432	15.5343	4.48569	26.5828	5.92614	2.56709	9.74017e-06	1.59161e-05	NC_006071.1	897661	898936	-	1065	YALI0_E07766g	GO:0004022;GO:0005737;GO:0008270;GO:0016491;GO:0046872;GO:0055114	-	-	YALI0E07766p [Yarrowia lipolytica CLIB122]	YALI0_E07766g	YALI0E07766g	2912456
gene6644	5.16756	0	10.3351	Inf	Inf	1.01396e-05	1.65352e-05	NC_006072.1	2900239	2900883	-	645	YALI0_F21923g	GO:0000122;GO:0000790;GO:0000981;GO:0003676;GO:0043565;GO:0045944	-	-	YALI0F21923p [Yarrowia lipolytica CLIB122]	YALI0_F21923g	YALI0F21923g	2908835
gene4881	9.05687	1.48691	16.6268	11.1821	3.48312	1.11408e-05	1.81356e-05	NC_006071.1	2124178	2124942	-	765	YALI0_E18007g	GO:0016020;GO:0016021	-	-	YALI0E18007p [Yarrowia lipolytica CLIB122]	YALI0_E18007g	YALI0E18007g	2911695
gene2302	30.0263	6.86169	53.1909	7.75187	2.95454	1.17347e-05	1.90782e-05	NC_006069.1	1388322	1389887	-	1566	YALI0_C10054g	GO:0004497;GO:0005506;GO:0016491;GO:0016705;GO:0016712;GO:0020037;GO:0046872;GO:0055114	-	-	YALI0C10054p [Yarrowia lipolytica CLIB122]	YALI0_C10054g	YALI0C10054g	2909455
gene3684	25.8774	11.8468	39.908	3.36869	1.75219	1.20478e-05	1.95526e-05	NC_006070.1	2167302	2168858	+	1557	YALI0_D17688g	GO:0006865;GO:0016020;GO:0016021;GO:0022857;GO:0055085	-	-	YALI0D17688p [Yarrowia lipolytica CLIB122]	YALI0_D17688g	YALI0D17688g	2911310
gene1613	432.555	284.171	580.939	2.04433	1.03163	1.41567e-05	2.28998e-05	NC_006068.1	2334864	2337776	-	2913	YALI0_B17864g	GO:0005886;GO:0005887;GO:0006811;GO:0006812;GO:0006813;GO:0008324;GO:0015079;GO:0016020;GO:0016021;GO:0030007;GO:0055085;GO:0071805;GO:0140107;GO:1990573	-	-	YALI0B17864p [Yarrowia lipolytica CLIB122]	YALI0_B17864g	YALI0B17864g	2906994
gene6347	350.255	219.254	481.257	2.19498	1.13421	1.41835e-05	2.29316e-05	NC_006072.1	2071963	2074941	+	2979	YALI0_F15367g	GO:0006508;GO:0006511;GO:0008233;GO:0008234;GO:0016579;GO:0016787;GO:0036459	K11839	[EC:3.4.19.12]	YALI0F15367p [Yarrowia lipolytica CLIB122]	YALI0_F15367g	YALI0F15367g	2908061
gene96	12.3597	3.28267	21.4367	6.53028	2.70714	1.44971e-05	2.34209e-05	NC_006067.1	303990	304157	-	168	YALI0_A02416g	GO:0005507;GO:0046872	-	-	YALI0A02416p [Yarrowia lipolytica CLIB122]	YALI0_A02416g	YALI0A02416g	7009336
gene5677	62.4399	40.2953	84.5845	2.09912	1.06978	1.68391e-05	2.71295e-05	NC_006072.1	38196	39953	-	1758	YALI0_F00330g	-	-	-	YALI0F00330p [Yarrowia lipolytica CLIB122]	YALI0_F00330g	YALI0F00330g	2908538
gene3631	35.5063	19.202	51.8106	2.69819	1.43199	1.71632e-05	2.76377e-05	NC_006070.1	2043009	2044001	+	993	YALI0_D16489g	-	-	-	YALI0D16489p [Yarrowia lipolytica CLIB122]	YALI0_D16489g	YALI0D16489g	2910198
gene1265	19.913	8.07599	31.75	3.93141	1.97505	1.79422e-05	2.88631e-05	NC_006068.1	1384010	1385347	+	1338	YALI0_B10087g	-	-	-	YALI0B10087p [Yarrowia lipolytica CLIB122]	YALI0_B10087g	YALI0B10087g	2907448
gene2541	11.1622	2.37855	19.9458	8.38568	3.06793	2.02486e-05	3.25e-05	NC_006069.1	2243682	2245895	-	2214	YALI0_C15807g	GO:0005886;GO:0015204;GO:0015489;GO:0015606;GO:0015840;GO:0015847;GO:0015848;GO:0016020;GO:0016021;GO:0022857;GO:0055085;GO:0071918;GO:1903711	K20989	-	YALI0C15807p [Yarrowia lipolytica CLIB122]	YALI0_C15807g	YALI0C15807g	2909438
gene877	13.2442	3.57031	22.9181	6.41907	2.68236	2.36622e-05	3.78749e-05	NC_006068.1	121856	123043	+	1188	YALI0_B00814g	-	-	-	YALI0B00814p [Yarrowia lipolytica CLIB122]	YALI0_B00814g	YALI0B00814g	2907568
gene7026	60.8222	39.2976	82.3469	2.09547	1.06727	2.36889e-05	3.79081e-05	NC_006072.1	3845571	3846176	+	606	YALI0_F30789g	-	-	-	YALI0F30789p [Yarrowia lipolytica CLIB122]	YALI0_F30789g	YALI0F30789g	2907908
gene4607	10.7732	2.68122	18.8651	7.03601	2.81476	3.32458e-05	5.28327e-05	NC_006071.1	1424976	1425371	-	396	YALI0_E11649g	-	-	-	YALI0E11649p [Yarrowia lipolytica CLIB122]	YALI0_E11649g	YALI0E11649g	2912792
gene6097	41.2974	24.157	58.4378	2.41908	1.27446	3.55e-05	5.62895e-05	NC_006072.1	1320567	1320953	-	387	YALI0_F09647g	-	-	-	YALI0F09647p [Yarrowia lipolytica CLIB122]	YALI0_F09647g	YALI0F09647g	2908972
gene301	60.3452	39.7212	80.9692	2.03844	1.02746	4.78788e-05	7.53774e-05	NC_006067.1	742426	743463	-	1038	YALI0_A07667g	GO:0005515	-	-	YALI0A07667p [Yarrowia lipolytica CLIB122]	YALI0_A07667g	YALI0A07667g	2905878
gene723	33.9406	19.076	48.8051	2.55845	1.35527	7.13456e-05	0.00011138	NC_006067.1	1986600	1987496	-	897	YALI0_A18524g	-	-	-	YALI0A18524p [Yarrowia lipolytica CLIB122]	YALI0_A18524g	YALI0A18524g	2906501
gene3099	16.9341	6.88047	26.9877	3.92236	1.97172	8.32935e-05	0.000129795	NC_006070.1	539953	541197	-	1245	YALI0_D04356g	-	-	-	YALI0D04356p [Yarrowia lipolytica CLIB122]	YALI0_D04356g	YALI0D04356g	2910636
gene5603	56.2039	36.9863	75.4215	2.03917	1.02798	8.80508e-05	0.000137041	NC_006071.1	4004954	4005931	-	978	YALI0_E33737g	-	-	-	YALI0E33737p [Yarrowia lipolytica CLIB122]	YALI0_E33737g	YALI0E33737g	2912468
gene1505	20.1897	9.28398	31.0954	3.34936	1.74389	0.000113316	0.000175513	NC_006068.1	2054797	2056179	-	1383	YALI0_B15488g	GO:0005887;GO:0016020;GO:0016021;GO:0055085;GO:0071627	-	-	YALI0B15488p [Yarrowia lipolytica CLIB122]	YALI0_B15488g	YALI0B15488g	2907356
gene2770	11.9203	3.8817	19.9589	5.14179	2.36227	0.000134989	0.000208629	NC_006069.1	2843032	2843565	-	534	YALI0_C21252g	-	-	-	YALI0C21252p [Yarrowia lipolytica CLIB122]	YALI0_C21252g	YALI0C21252g	2909860
gene2221	80.705	49.2332	112.177	2.27848	1.18807	0.00013676	0.000211264	NC_006069.1	1101677	1103062	-	1386	YALI0_C08228g	GO:0005887;GO:0016020;GO:0016021;GO:0055085	-	-	YALI0C08228p [Yarrowia lipolytica CLIB122]	YALI0_C08228g	YALI0C08228g	2909488
gene3323	79.946	49.4057	110.486	2.23631	1.16112	0.000151725	0.000233482	NC_006070.1	1180736	1182895	+	2160	YALI0_D09295g	GO:0003333;GO:0015171;GO:0016020;GO:0016021;GO:0055085	K16261	-	YALI0D09295p [Yarrowia lipolytica CLIB122]	YALI0_D09295g	YALI0D09295g	2910839
gene19	48.3494	31.2975	65.4013	2.08966	1.06327	0.000169498	0.000260021	NC_006067.1	65426	67021	+	1596	YALI0_A00550g	-	-	-	YALI0A00550p [Yarrowia lipolytica CLIB122]	YALI0_A00550g	YALI0A00550g	2906441
gene6684	19.0001	4.807	33.1931	6.90516	2.78768	0.000169625	0.000260154	NC_006072.1	3003570	3004727	-	1158	YALI0_F22825g	GO:0000907;GO:0000908;GO:0005737;GO:0016491;GO:0044273;GO:0055114	K19245	[EC:1.14.11.-]	YALI0F22825p [Yarrowia lipolytica CLIB122]	YALI0_F22825g	YALI0F22825g	2908794
gene57	11.7153	3.87794	19.5526	5.04201	2.334	0.000177677	0.000272244	NC_006067.1	182093	183157	+	1065	YALI0_A01441g	GO:0003824	K08726	-	YALI0A01441p [Yarrowia lipolytica CLIB122]	YALI0_A01441g	YALI0A01441g	2906065
gene4301	19.2859	8.96642	29.6054	3.3018	1.72325	0.00019473	0.00029759	NC_006071.1	527903	529468	-	1566	YALI0_E04664g	GO:0016020;GO:0016021	-	-	YALI0E04664p [Yarrowia lipolytica CLIB122]	YALI0_E04664g	YALI0E04664g	2912207
gene2231	29.9738	17.0812	42.8665	2.50958	1.32744	0.00023535	0.000358387	NC_006069.1	1156187	1160196	+	3930	YALI0_C08473g	GO:0007155	-	-	YALI0C08473p [Yarrowia lipolytica CLIB122]	YALI0_C08473g	YALI0C08473g	2909328
gene4811	23.4956	12.2291	34.7621	2.84258	1.5072	0.000270541	0.000411097	NC_006071.1	1949721	1950080	+	360	YALI0_E16390g	-	-	-	YALI0E16390p [Yarrowia lipolytica CLIB122]	YALI0_E16390g	YALI0E16390g	2911593
gene5368	12.9711	4.53934	21.4029	4.71498	2.23725	0.000303442	0.000460437	NC_006071.1	3419857	3421476	-	1620	YALI0_E28831g	-	-	-	YALI0E28831p [Yarrowia lipolytica CLIB122]	YALI0_E28831g	YALI0E28831g	2911867
gene2889	12.698	4.74718	20.6489	4.34971	2.12092	0.000319011	0.000483147	NC_006069.1	3192041	3192799	-	759	YALI0_C23837g	-	-	-	YALI0C23837p [Yarrowia lipolytica CLIB122]	YALI0_C23837g	YALI0C23837g	2909598
gene476	77.9255	49.4071	106.444	2.15443	1.1073	0.000325788	0.000492945	NC_006067.1	1278340	1278915	-	576	YALI0_A12199g	-	-	-	YALI0A12199p [Yarrowia lipolytica CLIB122]	YALI0_A12199g	YALI0A12199g	2906377
gene1111	23.2854	12.2329	34.3379	2.80702	1.48904	0.000328282	0.000496601	NC_006068.1	857732	859369	-	1638	YALI0_B06391g	GO:0005215;GO:0005351;GO:0005887;GO:0016020;GO:0016021;GO:0022857;GO:0034219;GO:0055085;GO:1902600	-	-	YALI0B06391p [Yarrowia lipolytica CLIB122]	YALI0_B06391g	YALI0B06391g	2907283
gene6532	92.1861	54.1023	130.27	2.40785	1.26774	0.000338865	0.000512007	NC_006072.1	2594227	2596266	+	2040	YALI0_F19426g	GO:0016020;GO:0016021	K12762	-	YALI0F19426p [Yarrowia lipolytica CLIB122]	YALI0_F19426g	YALI0F19426g	2908308
gene2501	8.21439	2.0398	14.389	7.05409	2.81846	0.000353933	0.000534398	NC_006069.1	2057833	2059176	-	1344	YALI0_C14938g	GO:0004190;GO:0005576;GO:0006508;GO:0008233;GO:0009277;GO:0016787;GO:0030163;GO:0031505	-	-	YALI0C14938p [Yarrowia lipolytica CLIB122]	YALI0_C14938g	YALI0C14938g	2909342
gene5062	14.7462	6.2129	23.2794	3.74695	1.90571	0.000413764	0.000622538	NC_006071.1	2604642	2605421	+	780	YALI0_E22088g	-	-	-	YALI0E22088p [Yarrowia lipolytica CLIB122]	YALI0_E22088g	YALI0E22088g	2911969
gene292	9.63248	2.97879	16.2862	5.46738	2.45085	0.000455217	0.000682028	NC_006067.1	716455	718329	-	1875	YALI0_A07425g	GO:0004499;GO:0005515;GO:0050660;GO:0050661;GO:0055114	-	-	YALI0A07425p [Yarrowia lipolytica CLIB122]	YALI0_A07425g	YALI0A07425g	2906130
gene2638	9.6241	2.96135	16.2868	5.4998	2.45938	0.000456302	0.000683494	NC_006069.1	2507304	2508035	+	732	YALI0_C18249g	-	-	-	YALI0C18249p [Yarrowia lipolytica CLIB122]	YALI0_C18249g	YALI0C18249g	2909995
gene990	38.3572	23.5155	53.199	2.2623	1.17779	0.000505248	0.000755049	NC_006068.1	491385	493148	+	1764	YALI0_B03498g	GO:0001510;GO:0005634;GO:0016607;GO:0036396	K05925	[EC:2.1.1.348]	YALI0B03498p [Yarrowia lipolytica CLIB122]	YALI0_B03498g	YALI0B03498g	2907327
gene4967	23.255	12.5343	33.9756	2.71061	1.43862	0.000510143	0.000762008	NC_006071.1	2373367	2374968	+	1602	YALI0_E19943g	GO:0004497;GO:0016705;GO:0055114	-	-	YALI0E19943p [Yarrowia lipolytica CLIB122]	YALI0_E19943g	YALI0E19943g	2911785
gene4722	44.6467	29.4831	59.8102	2.02863	1.0205	0.000514407	0.000768199	NC_006071.1	1713726	1714832	-	1107	YALI0_E14256g	GO:0005737;GO:0008863;GO:0016491;GO:0016616;GO:0042183;GO:0051287;GO:0055114	K00122	[EC:1.17.1.9]	YALI0E14256p [Yarrowia lipolytica CLIB122]	YALI0_E14256g	YALI0E14256g	2911506
gene5146	11.8536	4.44947	19.2578	4.32811	2.11374	0.000565471	0.000842496	NC_006071.1	2822737	2824503	-	1767	YALI0_E23859g	GO:0005315;GO:0005887;GO:0006817;GO:0015319;GO:0016020;GO:0016021;GO:0035435;GO:0035725	K14640	-	YALI0E23859p [Yarrowia lipolytica CLIB122]	YALI0_E23859g	YALI0E23859g	2912688
gene1667	11.8583	4.48945	19.2271	4.28274	2.09853	0.000611111	0.000907544	NC_006068.1	2514166	2515092	-	927	YALI0_B19030g	-	-	-	YALI0B19030p [Yarrowia lipolytica CLIB122]	YALI0_B19030g	YALI0B19030g	2906820
gene821	6.39702	0.603994	12.19	20.1824	4.33503	0.000810754	0.00119545	NC_006067.1	2235514	2236980	-	1467	YALI0_A20812g	GO:0016020;GO:0016021	-	-	YALI0A20812p [Yarrowia lipolytica CLIB122]	YALI0_A20812g	YALI0A20812g	2905775
gene3829	47.0607	26.5529	67.5686	2.54468	1.34749	0.000814656	0.00120093	NC_006070.1	2667296	2668495	+	1200	YALI0_D21098g	GO:0000907;GO:0000908;GO:0005737;GO:0016491;GO:0044273;GO:0055114	-	-	YALI0D21098p [Yarrowia lipolytica CLIB122]	YALI0_D21098g	YALI0D21098g	2910279
gene869	38.5844	25.1234	52.0453	2.07159	1.05074	0.000839985	0.00123685	NC_006068.1	72201	72665	-	465	YALI0_B00638g	GO:0006474;GO:0008080;GO:0010485;GO:0043967;GO:0043968;GO:0043998;GO:0061187;GO:1990189	K20794	[EC:2.3.1.257]	YALI0B00638p [Yarrowia lipolytica CLIB122]	YALI0_B00638g	YALI0B00638g	2907598
gene3188	3.15297	0	6.30594	Inf	Inf	0.00109226	0.00159878	NC_006070.1	816226	817170	-	945	YALI0_D06369g	-	-	-	YALI0D06369p [Yarrowia lipolytica CLIB122]	YALI0_D06369g	YALI0D06369g	2910871
gene3666	6.99819	1.81078	12.1856	6.72949	2.7505	0.00114663	0.00167531	NC_006070.1	2126999	2128174	+	1176	YALI0_D17270g	GO:0000324;GO:0004190;GO:0006508;GO:0008233;GO:0016787;GO:0030163;GO:0051603	-	-	YALI0D17270p [Yarrowia lipolytica CLIB122]	YALI0_D17270g	YALI0D17270g	2911230
gene5360	86.1388	56.1643	116.113	2.06739	1.04781	0.00124508	0.00181377	NC_006071.1	3400171	3405228	+	4746	YALI0_E28666g	-	-	-	YALI0E28666p [Yarrowia lipolytica CLIB122]	YALI0_E28666g	YALI0E28666g	2911628
gene232	6.29705	1.51186	11.0822	7.33019	2.87385	0.00151488	0.00219436	NC_006067.1	594468	594743	+	276	YALI0_A05973g	-	-	-	YALI0A05973p [Yarrowia lipolytica CLIB122]	YALI0_A05973g	YALI0A05973g	2905793
gene79	37.7075	18.4558	56.9591	3.08624	1.62585	0.00153226	0.00221803	NC_006067.1	254153	255943	-	1791	YALI0_A02024g	GO:0005515	-	-	YALI0A02024p [Yarrowia lipolytica CLIB122]	YALI0_A02024g	YALI0A02024g	2906017
gene3356	7.32374	2.09587	12.5516	5.98873	2.58225	0.00154693	0.00223825	NC_006070.1	1268728	1270359	+	1632	YALI0_D10021g	GO:0016020;GO:0016021	-	-	YALI0D10021p [Yarrowia lipolytica CLIB122]	YALI0_D10021g	YALI0D10021g	2910991
gene1867	12.1062	5.3611	18.8513	3.51632	1.81406	0.00223662	0.00320509	NC_006068.1	3055191	3055790	+	600	YALI0_B23474g	-	-	-	YALI0B23474p [Yarrowia lipolytica CLIB122]	YALI0_B23474g	YALI0B23474g	2906729
gene72	17.3747	9.28398	25.4654	2.74295	1.45573	0.00241514	0.00345551	NC_006067.1	231346	232332	-	987	YALI0_A01848g	-	-	-	YALI0A01848p [Yarrowia lipolytica CLIB122]	YALI0_A01848g	YALI0A01848g	2905986
gene297	2.76561	0	5.53123	Inf	Inf	0.00260036	0.00371554	NC_006067.1	728083	729666	-	1584	YALI0_A07579g	GO:0006865;GO:0016020;GO:0016021;GO:0022857;GO:0055085	-	-	YALI0A07579p [Yarrowia lipolytica CLIB122]	YALI0_A07579g	YALI0A07579g	2905893
gene296	25.1168	15.482	34.7517	2.24465	1.16649	0.00320008	0.00454111	NC_006067.1	724464	726422	+	1959	YALI0_A07557g	-	-	-	YALI0A07557p [Yarrowia lipolytica CLIB122]	YALI0_A07557g	YALI0A07557g	2906492
gene3946	45.3326	26.8431	63.8222	2.37761	1.24951	0.00321934	0.00456744	NC_006070.1	3105476	3106099	-	624	YALI0_D23837g	GO:0016020;GO:0016021	-	-	YALI0D23837p [Yarrowia lipolytica CLIB122]	YALI0_D23837g	YALI0D23837g	2910957
gene4952	22.0692	13.0959	31.0425	2.37039	1.24513	0.00330093	0.00467802	NC_006071.1	2341923	2342114	+	192	YALI0_E19613g	-	-	-	YALI0E19613p [Yarrowia lipolytica CLIB122]	YALI0_E19613g	YALI0E19613g	2911771
gene2584	5.21449	1.19055	9.23843	7.75979	2.95602	0.00374904	0.00528739	NC_006069.1	2384503	2386134	-	1632	YALI0_C16907g	GO:0005886;GO:0005887;GO:0015124;GO:0015719;GO:0016020;GO:0016021;GO:0022857;GO:0031224;GO:0035442;GO:0042938;GO:0042939;GO:0055085;GO:0071916	-	-	YALI0C16907p [Yarrowia lipolytica CLIB122]	YALI0_C16907g	YALI0C16907g	2909303
gene2110	2.58839	0	5.17678	Inf	Inf	0.00396196	0.00558153	NC_006069.1	739030	740244	-	1215	YALI0_C05731g	-	-	-	YALI0C05731p [Yarrowia lipolytica CLIB122]	YALI0_C05731g	YALI0C05731g	2910108
gene6528	93.6134	61.4188	125.808	2.04836	1.03447	0.00446842	0.00627299	NC_006072.1	2575303	2576556	-	1254	YALI0_F19316g	-	-	-	YALI0F19316p [Yarrowia lipolytica CLIB122]	YALI0_F19316g	YALI0F19316g	2908303
gene749	5.5683	1.19551	9.94109	8.31533	3.05577	0.00452286	0.00634387	NC_006067.1	2061153	2061752	+	600	YALI0_A19118g	-	-	-	YALI0A19118p [Yarrowia lipolytica CLIB122]	YALI0_A19118g	YALI0A19118g	2906156
gene323	7.11439	2.38606	11.8427	4.96328	2.3113	0.0045636	0.00639822	NC_006067.1	802374	802859	+	486	YALI0_A08195g	-	-	-	YALI0A08195p [Yarrowia lipolytica CLIB122]	YALI0_A08195g	YALI0A08195g	2905876
gene4469	25.4322	16.1595	34.705	2.14765	1.10276	0.00463885	0.00650186	NC_006071.1	1007612	1009684	-	2073	YALI0_E08580g	GO:0000746;GO:0005886;GO:0016020;GO:0016021;GO:0032220;GO:0043332	-	-	YALI0E08580p [Yarrowia lipolytica CLIB122]	YALI0_E08580g	YALI0E08580g	2912494
gene1165	23.8543	14.8555	32.8532	2.21152	1.14504	0.00481552	0.00674256	NC_006068.1	1032201	1033694	+	1494	YALI0_B07645g	-	-	-	YALI0B07645p [Yarrowia lipolytica CLIB122]	YALI0_B07645g	YALI0B07645g	2906763
gene354	11.4046	5.41475	17.3944	3.21241	1.68366	0.00540361	0.00751679	NC_006067.1	881043	882770	+	1728	YALI0_A08998g	GO:0005215;GO:0005351;GO:0005887;GO:0016020;GO:0016021;GO:0022857;GO:0034219;GO:0055085;GO:1902600	-	-	YALI0A08998p [Yarrowia lipolytica CLIB122]	YALI0_A08998g	YALI0A08998g	2906104
gene2463	12.5509	6.26401	18.8377	3.0073	1.58847	0.0057293	0.00795606	NC_006069.1	1948607	1950583	-	1977	YALI0_C13970g	-	-	-	YALI0C13970p [Yarrowia lipolytica CLIB122]	YALI0_C13970g	YALI0C13970g	2909723
gene5455	19.8555	12.0013	27.7097	2.3089	1.20721	0.00646732	0.00892491	NC_006071.1	3612971	3613738	-	768	YALI0_E30701g	-	-	-	YALI0E30701p [Yarrowia lipolytica CLIB122]	YALI0_E30701g	YALI0E30701g	2911946
gene3682	6.06177	1.80823	10.3153	5.70467	2.51214	0.00717162	0.00986713	NC_006070.1	2164141	2164524	+	384	YALI0_D17644g	-	-	-	YALI0D17644p [Yarrowia lipolytica CLIB122]	YALI0_D17644g	YALI0D17644g	2911308
gene5978	18.1247	10.7447	25.5046	2.37368	1.24713	0.00773707	0.0106042	NC_006072.1	1019246	1020901	+	1656	YALI0_F06908g	GO:0005215;GO:0005887;GO:0016020;GO:0016021;GO:0022857;GO:0055085	-	-	YALI0F06908p [Yarrowia lipolytica CLIB122]	YALI0_F06908g	YALI0F06908g	2908474
gene4127	12.1635	6.23785	18.0891	2.89989	1.536	0.00863748	0.0117779	NC_006071.1	82867	83928	-	1062	YALI0_E00814g	GO:0005739;GO:0005743;GO:0009916;GO:0010230;GO:0016020;GO:0016021;GO:0016491;GO:0046872;GO:0055114;GO:0070469	-	-	YALI0E00814p [Yarrowia lipolytica CLIB122]	YALI0_E00814g	YALI0E00814g	2912419
gene2640	24.9992	16.3362	33.6621	2.06058	1.04305	0.00864106	0.0117803	NC_006069.1	2514822	2518314	+	3447	YALI0_C18293g	-	-	-	YALI0C18293p [Yarrowia lipolytica CLIB122]	YALI0_C18293g	YALI0C18293g	2909974
gene4751	20.453	12.822	28.084	2.1903	1.13113	0.00991846	0.013456	NC_006071.1	1786657	1788270	+	1614	YALI0_E14971g	-	-	-	YALI0E14971p [Yarrowia lipolytica CLIB122]	YALI0_E14971g	YALI0E14971g	2911539
gene4832	15.3952	8.99257	21.7978	2.42398	1.27738	0.0119383	0.0160705	NC_006071.1	2002204	2002656	+	453	YALI0_E16885g	-	-	-	YALI0E16885p [Yarrowia lipolytica CLIB122]	YALI0_E16885g	YALI0E16885g	2911641
gene5064	22.7805	14.873	30.688	2.06333	1.04498	0.0119439	0.0160747	NC_006071.1	2607059	2607823	+	765	YALI0_E22132g	-	-	-	YALI0E22132p [Yarrowia lipolytica CLIB122]	YALI0_E22132g	YALI0E22132g	2911971
gene643	6.63722	1.79951	11.4749	6.37671	2.67281	0.0123385	0.0165988	NC_006067.1	1706062	1707867	-	1806	YALI0_A16610g	GO:0004767;GO:0005615;GO:0006685;GO:0008081;GO:0008152;GO:0016787;GO:0016798;GO:0046872	-	-	YALI0A16610p [Yarrowia lipolytica CLIB122]	YALI0_A16610g	YALI0A16610g	2906168
gene5292	13.085	6.2341	19.936	3.1979	1.67712	0.0134482	0.0180387	NC_006071.1	3216008	3217690	-	1683	YALI0_E27159g	GO:0005887;GO:0006855;GO:0016020;GO:0016021;GO:0055085	-	-	YALI0E27159p [Yarrowia lipolytica CLIB122]	YALI0_E27159g	YALI0E27159g	2912778
gene433	2.7441	0.291401	5.1968	17.8339	4.15655	0.0145787	0.0195184	NC_006067.1	1142201	1143544	-	1344	YALI0_A10945g	GO:0000776;GO:0000778;GO:0007052;GO:0031262;GO:0044877;GO:0045132;GO:0051315;GO:0051383	K11548	-	YALI0A10945p [Yarrowia lipolytica CLIB122]	YALI0_A10945g	YALI0A10945g	2905899
gene478	10.7699	5.67369	15.8661	2.79644	1.48359	0.0167291	0.0222997	NC_006067.1	1282612	1283529	+	918	YALI0_A12243g	-	-	-	YALI0A12243p [Yarrowia lipolytica CLIB122]	YALI0_A12243g	YALI0A12243g	2906517
gene6523	3.25839	0.591519	5.92526	10.017	3.32438	0.0170846	0.0227594	NC_006072.1	2566192	2567112	-	921	YALI0_F19206g	-	-	-	YALI0F19206p [Yarrowia lipolytica CLIB122]	YALI0_F19206g	YALI0F19206g	2907980
gene2	17.0536	10.0833	24.0239	2.38254	1.2525	0.0173926	0.0231408	NC_006067.1	11559	12653	+	1095	YALI0_A00154g	GO:0016020;GO:0016021	-	-	YALI0A00154p [Yarrowia lipolytica CLIB122]	YALI0_A00154g	YALI0A00154g	2906274
gene6186	4.29603	1.19055	7.40151	6.21687	2.63619	0.0176007	0.0234032	NC_006072.1	1546223	1546408	-	186	YALI0_F11715g	-	-	-	YALI0F11715p [Yarrowia lipolytica CLIB122]	YALI0_F11715g	YALI0F11715g	2908633
gene261	14.8266	8.91907	20.7341	2.32469	1.21704	0.0200677	0.0265459	NC_006067.1	652938	653264	+	327	YALI0_A06699g	GO:0000750;GO:0005737;GO:0005834;GO:0007165;GO:0007186;GO:0016020;GO:0031681	K07973	-	YALI0A06699p [Yarrowia lipolytica CLIB122]	YALI0_A06699g	YALI0A06699g	2905881
gene4245	27.6417	17.6662	37.6172	2.12933	1.0904	0.0205339	0.0271403	NC_006071.1	368894	370573	-	1680	YALI0_E03410g	GO:0000981;GO:0003677;GO:0003700;GO:0005634;GO:0006094;GO:0006355;GO:0006357;GO:0008270;GO:0043565;GO:0046872	-	-	YALI0E03410p [Yarrowia lipolytica CLIB122]	YALI0_E03410g	YALI0E03410g	2912149
gene4990	2.55478	0.300119	4.80944	16.0251	4.00226	0.02123	0.0280429	NC_006071.1	2426990	2428495	+	1506	YALI0_E20471g	GO:0005887;GO:0016020;GO:0016021;GO:0022857;GO:0031224;GO:0055085	-	-	YALI0E20471p [Yarrowia lipolytica CLIB122]	YALI0_E20471g	YALI0E20471g	2911817
gene2262	9.9308	4.74463	15.117	3.18612	1.6718	0.0234197	0.0308338	NC_006069.1	1240464	1241396	-	933	YALI0_C09119g	GO:0004032;GO:0005829;GO:0008106;GO:0016491;GO:0055114	-	-	YALI0C09119p [Yarrowia lipolytica CLIB122]	YALI0_C09119g	YALI0C09119g	2909709
gene3959	17.5415	6.26145	28.8215	4.60301	2.20258	0.0242465	0.0318701	NC_006070.1	3177588	3178631	-	1044	YALI0_D24145g	GO:0005887;GO:0016020;GO:0016021;GO:1903424;GO:1903425	K06199	-	YALI0D24145p [Yarrowia lipolytica CLIB122]	YALI0_D24145g	YALI0D24145g	2911016
gene5952	2.92279	0.300119	5.54547	18.4776	4.2077	0.0243706	0.0320266	NC_006072.1	946949	948061	-	1113	YALI0_F06380g	GO:0005515;GO:0016020;GO:0016021	-	-	YALI0F06380p [Yarrowia lipolytica CLIB122]	YALI0_F06380g	YALI0F06380g	2908409
gene6801	9.83421	4.20301	15.4654	3.67961	1.87955	0.0246296	0.0323537	NC_006072.1	3283217	3285016	-	1800	YALI0_F25553g	GO:0005351;GO:0005887;GO:0016020;GO:0016021;GO:0022857;GO:0034219;GO:0055085;GO:1902600	-	-	YALI0F25553p [Yarrowia lipolytica CLIB122]	YALI0_F25553g	YALI0F25553g	2908372
gene2771	15.5819	9.74713	21.4167	2.19723	1.13569	0.026228	0.0343901	NC_006069.1	2844614	2845135	+	522	YALI0_C21274g	-	-	-	YALI0C21274p [Yarrowia lipolytica CLIB122]	YALI0_C21274g	YALI0C21274g	2909839
gene636	7.86874	3.56655	12.1709	3.41252	1.77084	0.0273504	0.035796	NC_006067.1	1688337	1690352	+	2016	YALI0_A16445g	GO:0005507;GO:0008131;GO:0009308;GO:0016491;GO:0046872;GO:0048038;GO:0055114	-	-	YALI0A16445p [Yarrowia lipolytica CLIB122]	YALI0_A16445g	YALI0A16445g	2906052
gene2251	4.44313	1.49188	7.39439	4.95644	2.3093	0.0296348	0.0386125	NC_006069.1	1202837	1203274	+	438	YALI0_C08921g	GO:0016020;GO:0016021	-	-	YALI0C08921p [Yarrowia lipolytica CLIB122]	YALI0_C08921g	YALI0C08921g	2910022
gene1508	7.85112	3.89042	11.8118	3.03613	1.60223	0.0301671	0.0392502	NC_006068.1	2063147	2063383	+	237	YALI0_B15554g	-	-	-	YALI0B15554p [Yarrowia lipolytica CLIB122]	YALI0_B15554g	YALI0B15554g	2906911
gene5370	12.1012	7.20058	17.0017	2.36116	1.2395	0.031651	0.0410977	NC_006071.1	3422951	3424378	-	1428	YALI0_E28875g	GO:0004252;GO:0005615;GO:0006508;GO:0008233;GO:0008236;GO:0016787	-	-	YALI0E28875p [Yarrowia lipolytica CLIB122]	YALI0_E28875g	YALI0E28875g	2911869
gene693	14.71	6.55044	22.8696	3.49131	1.80377	0.0321567	0.0417458	NC_006067.1	1850186	1851787	-	1602	YALI0_A17875g	GO:0004028;GO:0006081;GO:0016491;GO:0016620;GO:0055114	-	-	YALI0A17875p [Yarrowia lipolytica CLIB122]	YALI0_A17875g	YALI0A17875g	2905787
gene1139	16.77	11.0074	22.5325	2.04703	1.03353	0.0338793	0.0438845	NC_006068.1	935934	936458	+	525	YALI0_B07051g	GO:0016020;GO:0016021	-	-	YALI0B07051p [Yarrowia lipolytica CLIB122]	YALI0_B07051g	YALI0B07051g	2906916
gene5665	2.7556	0	5.51121	Inf	Inf	0.0340705	0.0441143	NC_006071.1	4213549	4214922	-	1374	YALI0_E35222g	GO:0009395;GO:0016788	K01078	[EC:3.1.3.2]	YALI0E35222p [Yarrowia lipolytica CLIB122]	YALI0_E35222g	YALI0E35222g	2912348
gene3590	4.77106	1.79951	7.74261	4.30263	2.10522	0.0354501	0.0458358	NC_006070.1	1886948	1888570	-	1623	YALI0_D15422g	GO:0003333;GO:0015171;GO:0016020;GO:0016021;GO:0022857;GO:0055085	K16261	-	YALI0D15422p [Yarrowia lipolytica CLIB122]	YALI0_D15422g	YALI0D15422g	2910760
gene1527	11.8829	7.17187	16.5939	2.31375	1.21023	0.0377814	0.048703	NC_006068.1	2118601	2119332	-	732	YALI0_B15994g	-	-	-	YALI0B15994p [Yarrowia lipolytica CLIB122]	YALI0_B15994g	YALI0B15994g	2906791
gene436	3.27452	0.603994	5.94505	9.8429	3.29908	0.038682	0.0498138	NC_006067.1	1152755	1154215	+	723	YALI0_A11011g	-	-	-	YALI0A11011p [Yarrowia lipolytica CLIB122]	YALI0_A11011g	YALI0A11011g	2905833
