# Supplementary material for: Metabolome and Transcriptome Profiling Reveal Carbon Metabolic Flux Changes in Yarrowia lipolytica Cells to Rapamycin
Source: J Fungi (Basel). 2022 Sep 6;8(9):939. doi: 10.3390/jof8090939 (PMC9504542; doi:10.3390/jof8090939)
Supplement: Supplementary file 1 [file jof-08-00939-s001.zip › Table S5.xlsx]

## Sheet: Sheet1
Table S5: The down-regulated genes.
id	baseMean	baseMeanA	baseMeanB	foldChange	log2FoldChange	pval	padj	Chromosome	Start Site	End Site	Direction	Length	Name	GO	KEGG	EC	Description	locus_tag	old_locus_tag	Dbxref_GeneID
gene1101	3631.33	6699.33	563.331	0.0840878	-3.57196	0	0	NC_006068.1	815726	816685	+	960	YALI0_B06116g	GO:0003723;GO:0003735;GO:0005739;GO:0005763;GO:0005840;GO:0006412	K02996	-	YALI0B06116p [Yarrowia lipolytica CLIB122]	YALI0_B06116g	YALI0B06116g	2906656
gene1177	2581.24	4833.17	329.304	0.0681341	-3.87548	0	0	NC_006068.1	1076839	1077738	-	900	YALI0_B08074g	GO:0003735;GO:0005762	K02902	-	YALI0B08074p [Yarrowia lipolytica CLIB122]	YALI0_B08074g	YALI0B08074g	2907442
gene121	2553.23	4678.19	428.281	0.0915484	-3.44932	0	0	NC_006067.1	353774	354193	+	420	YALI0_A03003g	GO:0003735;GO:0005840;GO:0006412;GO:0015935	K02950	-	putative mitochondrial 37S ribosomal protein MRPS12 [Yarrowia lipolytica CLIB122]	YALI0_A03003g	YALI0A03003g	2905958
gene1212	13437.6	21827	5048.31	0.231288	-2.11224	0	0	NC_006068.1	1218176	1218688	-	513	YALI0_B08899g	GO:0016020;GO:0016021	-	-	YALI0B08899p [Yarrowia lipolytica CLIB122]	YALI0_B08899g	YALI0B08899g	2907110
gene1268	21771.4	39009.5	4533.38	0.116212	-3.10517	0	0	NC_006068.1	1391256	1392515	-	1260	YALI0_B10153g	GO:0006629;GO:0016020;GO:0016021	K10256	-	YALI0B10153p [Yarrowia lipolytica CLIB122]	YALI0_B10153g	YALI0B10153g	2906773
gene1284	4884.95	9085.1	684.8	0.0753762	-3.72975	0	0	NC_006068.1	1437668	1439383	+	1716	YALI0_B10494g	GO:0003723;GO:0003735;GO:0005763;GO:0006412;GO:0015935;GO:0019843;GO:0045903	-	-	YALI0B10494p [Yarrowia lipolytica CLIB122]	YALI0_B10494g	YALI0B10494g	2907600
gene1289	1447.69	2569.42	325.967	0.126864	-2.97864	0	0	NC_006068.1	1447932	1449359	-	1428	YALI0_B10604g	GO:0004497;GO:0016705;GO:0055114	-	-	YALI0B10604p [Yarrowia lipolytica CLIB122]	YALI0_B10604g	YALI0B10604g	2907633
gene1306	3215.56	5966.32	464.803	0.0779044	-3.68215	0	0	NC_006068.1	1489600	1490622	-	1023	YALI0_B11000g	GO:0003735;GO:0005739;GO:0005761;GO:0005762;GO:0005840;GO:0006412;GO:0032543	K17428	-	YALI0B11000p [Yarrowia lipolytica CLIB122]	YALI0_B11000g	YALI0B11000g	2906875
gene1436	3094.85	5276.43	913.26	0.173083	-2.53047	0	0	NC_006068.1	1879706	1881535	+	1830	YALI0_B14014g	GO:0016614;GO:0050660;GO:0055114	-	-	YALI0B14014p [Yarrowia lipolytica CLIB122]	YALI0_B14014g	YALI0B14014g	2906990
gene1482	2074.94	3753.17	396.709	0.1057	-3.24195	0	0	NC_006068.1	1993755	1994636	+	882	YALI0_B14993g	GO:0003735;GO:0005763;GO:0070124	-	-	YALI0B14993p [Yarrowia lipolytica CLIB122]	YALI0_B14993g	YALI0B14993g	2907341
gene1561	2031.62	3528.19	535.056	0.151651	-2.72117	0	0	NC_006068.1	2202238	2203020	+	783	YALI0_B16742g	GO:0004784;GO:0006801;GO:0019430;GO:0046872;GO:0055114	K04564	[EC:1.15.1.1]	YALI0B16742p [Yarrowia lipolytica CLIB122]	YALI0_B16742g	YALI0B16742g	2907154
gene1607	2172.86	3939.16	406.559	0.103209	-3.27635	0	0	NC_006068.1	2313252	2314419	+	618	YALI0_B17732g	GO:0003735;GO:0005622;GO:0005762;GO:0005840;GO:0006412	-	-	YALI0B17732p [Yarrowia lipolytica CLIB122]	YALI0_B17732g	YALI0B17732g	2907161
gene1656	4202.48	6887.88	1517.08	0.220253	-2.18277	0	0	NC_006068.1	2470882	2475357	+	3546	YALI0_B18810g	GO:0003729;GO:0005515;GO:0005737;GO:0007005;GO:0048312	K03255	-	YALI0B18810p [Yarrowia lipolytica CLIB122]	YALI0_B18810g	YALI0B18810g	2906886
gene1692	1725.45	3075.76	375.138	0.121966	-3.03545	0	0	NC_006068.1	2595878	2596687	+	810	YALI0_B19646g	GO:0005743;GO:0007007;GO:0032979;GO:0043022	K17801	-	YALI0B19646p [Yarrowia lipolytica CLIB122]	YALI0_B19646g	YALI0B19646g	2907244
gene1710	2409.9	4474.6	345.198	0.0771461	-3.69626	0	0	NC_006068.1	2643941	2644981	-	1041	YALI0_B20086g	GO:0004784;GO:0006801;GO:0019430;GO:0046872;GO:0055114	K04564	[EC:1.15.1.1]	YALI0B20086p [Yarrowia lipolytica CLIB122]	YALI0_B20086g	YALI0B20086g	2906892
gene1797	850.891	1628.93	72.8546	0.0447255	-4.48276	0	0	NC_006068.1	2876130	2878655	-	2526	YALI0_B21978g	GO:0003743;GO:0003924;GO:0005525;GO:0005622;GO:0005739;GO:0006413;GO:0070124	K02519	-	YALI0B21978p [Yarrowia lipolytica CLIB122]	YALI0_B21978g	YALI0B21978g	2906761
gene2207	2486.71	4632.67	340.751	0.0735539	-3.76506	0	0	NC_006069.1	1044193	1044891	-	699	YALI0_C07887g	GO:0003735;GO:0005622;GO:0005840;GO:0006412;GO:0022627	K02961	-	YALI0C07887p [Yarrowia lipolytica CLIB122]	YALI0_C07887g	YALI0C07887g	2909780
gene2333	1005.82	1875.09	136.559	0.0728279	-3.77936	0	0	NC_006069.1	1494071	1496989	-	2919	YALI0_C10780g	GO:0000049;GO:0000166;GO:0002161;GO:0004812;GO:0004822;GO:0005524;GO:0005739;GO:0006412;GO:0006418;GO:0006428;GO:0016874;GO:0032543;GO:0106074	K01870	[EC:6.1.1.5]	YALI0C10780p [Yarrowia lipolytica CLIB122]	YALI0_C10780g	YALI0C10780g	2909362
gene2334	2438.41	4391.33	485.492	0.110557	-3.17714	0	0	NC_006069.1	1497700	1498365	+	666	YALI0_C10802g	GO:0003735;GO:0005622;GO:0005762;GO:0006412;GO:0015934;GO:0042254	K02864	-	YALI0C10802p [Yarrowia lipolytica CLIB122]	YALI0_C10802g	YALI0C10802g	2909363
gene2343	3323.12	5612.78	1033.45	0.184125	-2.44124	0	0	NC_006069.1	1521003	1522435	+	1185	YALI0_C10989g	GO:0008654;GO:0016020;GO:0016021;GO:0016740;GO:0016780	K00994	[EC:2.7.8.2]	YALI0C10989p [Yarrowia lipolytica CLIB122]	YALI0_C10989g	YALI0C10989g	2909135
gene2451	4166.84	7469.73	863.946	0.11566	-3.11204	0	0	NC_006069.1	1874985	1876214	+	1230	YALI0_C13706g	GO:0003735;GO:0005763;GO:0032543	K17408	-	YALI0C13706p [Yarrowia lipolytica CLIB122]	YALI0_C13706g	YALI0C13706g	2909210
gene252	2135.39	3914.69	356.092	0.090963	-3.45858	0	0	NC_006067.1	628014	628577	+	564	YALI0_A06501g	GO:0003735;GO:0005622;GO:0005840;GO:0006412	-	-	YALI0A06501p [Yarrowia lipolytica CLIB122]	YALI0_A06501g	YALI0A06501g	2905999
gene2529	1820.31	3387.88	252.731	0.0745985	-3.74471	0	0	NC_006069.1	2160676	2161914	-	1239	YALI0_C15466g	-	-	-	YALI0C15466p [Yarrowia lipolytica CLIB122]	YALI0_C15466g	YALI0C15466g	2909409
gene2565	2013.24	3579.3	447.182	0.124935	-3.00075	0	0	NC_006069.1	2324018	2324707	-	690	YALI0_C16478g	GO:0005761;GO:0005762	K17421	-	YALI0C16478p [Yarrowia lipolytica CLIB122]	YALI0_C16478g	YALI0C16478g	2909749
gene2633	2783.54	4770.8	796.286	0.166908	-2.58287	0	0	NC_006069.1	2498912	2499836	-	669	YALI0_C18139g	GO:0003735;GO:0005762;GO:0005840;GO:0006412;GO:0019843;GO:0032543	-	-	YALI0C18139p [Yarrowia lipolytica CLIB122]	YALI0_C18139g	YALI0C18139g	2909992
gene2652	2830.91	4824.19	837.64	0.173634	-2.52588	0	0	NC_006069.1	2546454	2547791	-	1338	YALI0_C18535g	GO:0000049;GO:0000166;GO:0004812;GO:0004826;GO:0005524;GO:0005737;GO:0005739;GO:0006432;GO:0043039	K01889	[EC:6.1.1.20]	YALI0C18535p [Yarrowia lipolytica CLIB122]	YALI0_C18535g	YALI0C18535g	2909983
gene2766	2145.21	3961.67	328.75	0.0829828	-3.59104	0	0	NC_006069.1	2823892	2824452	+	561	YALI0_C21109g	GO:0003735;GO:0005762;GO:0006412;GO:0015934	K02911	-	YALI0C21109p [Yarrowia lipolytica CLIB122]	YALI0_C21109g	YALI0C21109g	2909851
gene2909	3481.26	6353.81	608.703	0.0958012	-3.38381	0	0	NC_006069.1	3240392	3241369	+	978	YALI0_C24277g	GO:0003735;GO:0005622;GO:0005840;GO:0006412	K02956	-	YALI0C24277p [Yarrowia lipolytica CLIB122]	YALI0_C24277g	YALI0C24277g	2909587
gene2994	4705.43	8595.7	815.15	0.0948322	-3.39848	0	0	NC_006070.1	208679	209617	+	939	YALI0_D01804g	GO:0003723;GO:0003735;GO:0005763;GO:0005840;GO:0006412;GO:1990904	K02988	-	YALI0D01804p [Yarrowia lipolytica CLIB122]	YALI0_D01804g	YALI0D01804g	2910475
gene3050	10533.6	17765.7	3301.43	0.185832	-2.42793	0	0	NC_006070.1	393977	395173	-	1197	YALI0_D03135g	GO:0004455;GO:0005739;GO:0008652;GO:0009082;GO:0009097;GO:0009099;GO:0016491;GO:0046872;GO:0055114	K00053	[EC:1.1.1.86]	YALI0D03135p [Yarrowia lipolytica CLIB122]	YALI0_D03135g	YALI0D03135g	2910563
gene3078	2375.52	4308.51	442.535	0.102712	-3.28332	0	0	NC_006070.1	489249	489938	-	690	YALI0_D03916g	GO:0003735;GO:0005739;GO:0005763;GO:0005840	K17402	-	YALI0D03916p [Yarrowia lipolytica CLIB122]	YALI0_D03916g	YALI0D03916g	2910593
gene3232	5475.09	9537.13	1413.05	0.148163	-2.75474	0	0	NC_006070.1	935387	937681	+	2295	YALI0_D07326g	GO:0000166;GO:0003746;GO:0003924;GO:0005525;GO:0005622;GO:0005739;GO:0006412;GO:0006414;GO:0070125	K02355	-	YALI0D07326p [Yarrowia lipolytica CLIB122]	YALI0_D07326g	YALI0D07326g	2910889
gene3283	3892.43	6852.61	932.255	0.136044	-2.87786	0	0	NC_006070.1	1084443	1085621	-	1179	YALI0_D08448g	GO:0003735;GO:0005739;GO:0005763;GO:0005840;GO:0032543	K17413	-	YALI0D08448p [Yarrowia lipolytica CLIB122]	YALI0_D08448g	YALI0D08448g	2910705
gene3284	2573.39	4611.74	535.042	0.116018	-3.10759	0	0	NC_006070.1	1086336	1087340	+	1005	YALI0_D08470g	GO:0000028;GO:0003729;GO:0003735;GO:0005763;GO:0006412;GO:0019843	K02992	-	YALI0D08470p [Yarrowia lipolytica CLIB122]	YALI0_D08470g	YALI0D08470g	2910706
gene3322	27959	43545	12373	0.284144	-1.81531	0	0	NC_006070.1	1176675	1176998	+	324	YALI0_D09273g	GO:0005739;GO:0005758;GO:0006122;GO:0006123;GO:0009055;GO:0020037;GO:0046872;GO:0055114;GO:0070469	K08738	-	YALI0D09273p [Yarrowia lipolytica CLIB122]	YALI0_D09273g	YALI0D09273g	2910838
gene3358	2095.05	3789.43	400.671	0.105734	-3.24149	0	0	NC_006070.1	1274740	1275279	+	465	YALI0_D10065g	GO:0003729;GO:0003735;GO:0005762;GO:0005840;GO:0006412;GO:0017148	K02871	-	mitochondrial 54S ribosomal protein YmL23 [Yarrowia lipolytica CLIB122]	YALI0_D10065g	YALI0D10065g	2910993
gene3462	3201.53	5751.89	651.177	0.113211	-3.14291	0	0	NC_006070.1	1532971	1534095	+	1125	YALI0_D12320g	GO:0003735;GO:0005622;GO:0005739;GO:0005762;GO:0005840;GO:0006412	-	-	YALI0D12320p [Yarrowia lipolytica CLIB122]	YALI0_D12320g	YALI0D12320g	2910133
gene3476	5131.36	9262.71	1000.02	0.107962	-3.2114	0	0	NC_006070.1	1574095	1575366	+	1272	YALI0_D12606g	GO:0003723;GO:0003735;GO:0005762;GO:0005840;GO:0006412;GO:0015934;GO:0016740;GO:0032543	-	-	mitochondrial 54S ribosomal protein RML2 [Yarrowia lipolytica CLIB122]	YALI0_D12606g	YALI0D12606g	2910147
gene3483	3062.71	5691.94	433.481	0.076157	-3.71488	0	0	NC_006070.1	1594043	1594927	-	885	YALI0_D12771g	GO:0003723;GO:0003735;GO:0005762;GO:0006412;GO:0015934	-	-	YALI0D12771p [Yarrowia lipolytica CLIB122]	YALI0_D12771g	YALI0D12771g	2911260
gene3706	2793.36	4971.43	615.288	0.123765	-3.01433	0	0	NC_006070.1	2272303	2273496	+	1194	YALI0_D18150g	GO:0003725;GO:0004525;GO:0005634;GO:0006396;GO:0030422;GO:0031053;GO:0031054;GO:0090501;GO:0090502	-	-	YALI0D18150p [Yarrowia lipolytica CLIB122]	YALI0_D18150g	YALI0D18150g	2911103
gene3862	2147	3900.27	393.728	0.100949	-3.3083	0	0	NC_006070.1	2790274	2791059	-	786	YALI0_D21934g	GO:0005739	-	-	YALI0D21934p [Yarrowia lipolytica CLIB122]	YALI0_D21934g	YALI0D21934g	2910738
gene3869	1635.41	3024.28	246.535	0.0815184	-3.61673	0	0	NC_006070.1	2804740	2805198	+	459	YALI0_D22088g	GO:0000027;GO:0003735;GO:0005762;GO:0005840;GO:0006412;GO:0015934;GO:0019843;GO:0070180	K02867	-	mitochondrial 54S ribosomal protein YmL19 [Yarrowia lipolytica CLIB122]	YALI0_D22088g	YALI0D22088g	2910314
gene3914	1824.02	3239.53	408.503	0.126099	-2.98737	0	0	NC_006070.1	3000881	3001432	-	552	YALI0_D23155g	GO:0003735;GO:0005762	K17438	-	YALI0D23155p [Yarrowia lipolytica CLIB122]	YALI0_D23155g	YALI0D23155g	2910286
gene4402	739.283	1406.63	71.9413	0.0511446	-4.28927	0	0	NC_006071.1	797779	799845	-	2067	YALI0_E06941g	GO:0002098;GO:0005739;GO:0008033;GO:0030488;GO:0050660;GO:0070899	K03495	-	YALI0E06941p [Yarrowia lipolytica CLIB122]	YALI0_E06941g	YALI0E06941g	2912421
gene4470	2379.18	4462.59	295.768	0.0662773	-3.91534	0	0	NC_006071.1	1010800	1011792	+	993	YALI0_E08602g	-	-	-	YALI0E08602p [Yarrowia lipolytica CLIB122]	YALI0_E08602g	YALI0E08602g	2912495
gene4640	3395.44	6290.99	499.881	0.0794599	-3.65363	0	0	NC_006071.1	1503078	1503866	+	789	YALI0_E12353g	GO:0003735;GO:0005622;GO:0005762;GO:0005840;GO:0006412;GO:0032543	K02892	-	YALI0E12353p [Yarrowia lipolytica CLIB122]	YALI0_E12353g	YALI0E12353g	2912824
gene4715	2562.59	4595.53	529.637	0.11525	-3.11716	0	0	NC_006071.1	1698852	1699548	-	621	YALI0_E14124g	GO:0000028;GO:0000462;GO:0003735;GO:0005763;GO:0005840;GO:0006412;GO:0048027;GO:0070181	K02948	-	YALI0E14124p [Yarrowia lipolytica CLIB122]	YALI0_E14124g	YALI0E14124g	2911500
gene4852	3030.59	5420.13	641.037	0.11827	-3.07985	0	0	NC_006071.1	2051593	2052207	+	615	YALI0_E17369g	GO:0000150;GO:0003697;GO:0003735;GO:0005634;GO:0005739;GO:0005762;GO:0005840;GO:0006310;GO:0006355;GO:0090297	-	-	YALI0E17369p [Yarrowia lipolytica CLIB122]	YALI0_E17369g	YALI0E17369g	2911667
gene4878	5783.06	9775.99	1790.13	0.183115	-2.44918	0	0	NC_006071.1	2115618	2116490	+	873	YALI0_E17941g	-	-	-	YALI0E17941p [Yarrowia lipolytica CLIB122]	YALI0_E17941g	YALI0E17941g	2911692
gene4991	2614.2	4618.06	610.341	0.132164	-2.9196	0	0	NC_006071.1	2428699	2429514	-	816	YALI0_E20493g	GO:0003735;GO:0005840;GO:0006412	K02926	-	YALI0E20493p [Yarrowia lipolytica CLIB122]	YALI0_E20493g	YALI0E20493g	2911818
gene5140	3990.47	7387.06	593.877	0.0803942	-3.63676	0	0	NC_006071.1	2806692	2807570	-	879	YALI0_E23760g	GO:0003735;GO:0005762;GO:0005840;GO:0006412;GO:0015934;GO:0042255	-	-	YALI0E23760p [Yarrowia lipolytica CLIB122]	YALI0_E23760g	YALI0E23760g	2912683
gene5189	2753.93	5257.69	250.168	0.0475813	-4.39346	0	0	NC_006071.1	2965071	2965928	+	858	YALI0_E24805g	GO:0003735;GO:0005762;GO:0016787	K17427	-	YALI0E24805p [Yarrowia lipolytica CLIB122]	YALI0_E24805g	YALI0E24805g	2912664
gene5191	1632.23	2910.16	354.295	0.121744	-3.03808	0	0	NC_006071.1	2968164	2969921	-	1758	YALI0_E24849g	GO:0003676;GO:0003723;GO:0005634	K15560	-	YALI0E24849p [Yarrowia lipolytica CLIB122]	YALI0_E24849g	YALI0E24849g	2912668
gene520	15293.1	24044.1	6542.09	0.272087	-1.87786	0	0	NC_006067.1	1381245	1382939	+	1695	YALI0_A13387g	GO:0000166;GO:0004066;GO:0005524;GO:0005829;GO:0006529;GO:0006541;GO:0008652	K01953	[EC:6.3.5.4]	YALI0A13387p [Yarrowia lipolytica CLIB122]	YALI0_A13387g	YALI0A13387g	2906288
gene526	3786.6	6723.83	849.362	0.126321	-2.98483	0	0	NC_006067.1	1392425	1393613	+	1020	YALI0_A13541g	GO:0003735;GO:0005763;GO:0032543	-	-	YALI0A13541p [Yarrowia lipolytica CLIB122]	YALI0_A13541g	YALI0A13541g	2906206
gene5439	1822.67	3199.63	445.712	0.139301	-2.84372	0	0	NC_006071.1	3580436	3581122	-	687	YALI0_E30371g	GO:0003735;GO:0005622;GO:0005763;GO:0005840;GO:0006412;GO:0070181	K02963	-	YALI0E30371p [Yarrowia lipolytica CLIB122]	YALI0_E30371g	YALI0E30371g	2911935
gene5527	3060.51	5601.9	519.112	0.0926672	-3.4318	0	0	NC_006071.1	3817222	3818286	+	1065	YALI0_E32153g	GO:0003735;GO:0005762	K17439	-	YALI0E32153p [Yarrowia lipolytica CLIB122]	YALI0_E32153g	YALI0E32153g	2912354
gene5612	11382.2	20564.4	2200.04	0.106983	-3.22455	0	0	NC_006071.1	4034901	4036457	+	1557	YALI0_E33935g	GO:0004622;GO:0005811;GO:0016020;GO:0016021;GO:0044255	-	-	YALI0E33935p [Yarrowia lipolytica CLIB122]	YALI0_E33935g	YALI0E33935g	2911475
gene5627	2168.51	4012.36	324.655	0.0809137	-3.62747	0	0	NC_006071.1	4072258	4073856	-	1599	YALI0_E34265g	GO:0004096;GO:0005777;GO:0006979;GO:0020037;GO:0042542;GO:0042744;GO:0046872;GO:0055114;GO:0098869	K03781	[EC:1.11.1.6]	YALI0E34265p [Yarrowia lipolytica CLIB122]	YALI0_E34265g	YALI0E34265g	2912364
gene5969	1536.14	2946.56	125.722	0.0426673	-4.55072	0	0	NC_006072.1	989511	990134	+	624	YALI0_F06732g	GO:0003735;GO:0004525;GO:0005762;GO:0006396;GO:0032543;GO:0090501;GO:0090502	K17437	-	YALI0F06732p [Yarrowia lipolytica CLIB122]	YALI0_F06732g	YALI0F06732g	2908519
gene5970	10250.5	17381.4	3119.63	0.179481	-2.4781	0	0	NC_006072.1	993169	994083	+	915	YALI0_F06754g	GO:0006629;GO:0006631;GO:0006633;GO:0009922;GO:0016020;GO:0016021;GO:0016740;GO:0019367;GO:0030148;GO:0030176;GO:0034625;GO:0034626;GO:0042761;GO:0102336;GO:0102337;GO:0102338;GO:0102756	-	-	YALI0F06754p [Yarrowia lipolytica CLIB122]	YALI0_F06754g	YALI0F06754g	2908520
gene6061	2381.69	4374.46	388.912	0.0889051	-3.49159	0	0	NC_006072.1	1232980	1235040	+	2061	YALI0_F08833g	GO:0003676;GO:0003723;GO:0005524;GO:0005739	K17679	[EC:3.6.4.13]	YALI0F08833p [Yarrowia lipolytica CLIB122]	YALI0_F08833g	YALI0F08833g	2908230
gene6063	2488.57	4315.41	661.732	0.153342	-2.70518	0	0	NC_006072.1	1241571	1242014	-	444	YALI0_F08877g	GO:0003735;GO:0005762;GO:0005840	-	-	YALI0F08877p [Yarrowia lipolytica CLIB122]	YALI0_F08877g	YALI0F08877g	2908232
gene6071	2368.81	4037.64	699.977	0.173363	-2.52813	0	0	NC_006072.1	1262102	1263298	-	1197	YALI0_F09053g	-	-	-	YALI0F09053p [Yarrowia lipolytica CLIB122]	YALI0_F09053g	YALI0F09053g	2908333
gene6113	2317.03	4010.51	623.543	0.155477	-2.68523	0	0	NC_006072.1	1357774	1358385	+	612	YALI0_F10032g	GO:0003735;GO:0005622;GO:0005762;GO:0005840;GO:0006412;GO:0019843	K02933	-	YALI0F10032p [Yarrowia lipolytica CLIB122]	YALI0_F10032g	YALI0F10032g	2908994
gene6115	3369.75	5662.91	1076.59	0.190112	-2.39508	0	0	NC_006072.1	1360092	1360925	+	834	YALI0_F10076g	GO:0003735;GO:0005622;GO:0005739;GO:0005762;GO:0005840;GO:0006412	K02906	-	YALI0F10076p [Yarrowia lipolytica CLIB122]	YALI0_F10076g	YALI0F10076g	2908996
gene6139	2620.36	4448.54	792.187	0.178078	-2.48942	0	0	NC_006072.1	1428812	1429627	+	816	YALI0_F10615g	GO:0005741;GO:0007005;GO:0016020;GO:0016021;GO:0032592;GO:0055088	-	-	YALI0F10615p [Yarrowia lipolytica CLIB122]	YALI0_F10615g	YALI0F10615g	2908967
gene6165	4944.09	9147.33	740.852	0.080991	-3.62609	0	0	NC_006072.1	1492863	1493105	-	243	YALI0_F11275g	-	-	-	YALI0F11275p [Yarrowia lipolytica CLIB122]	YALI0_F11275g	YALI0F11275g	2907967
gene6239	4129.85	7591.72	667.975	0.0879874	-3.50656	0	0	NC_006072.1	1743173	1744456	-	1284	YALI0_F12991g	GO:0003735;GO:0005622;GO:0005763;GO:0005840;GO:0006412;GO:0015935	K02967	-	YALI0F12991p [Yarrowia lipolytica CLIB122]	YALI0_F12991g	YALI0F12991g	2908174
gene6420	2467.61	4506.59	428.639	0.0951139	-3.3942	0	0	NC_006072.1	2284928	2285776	+	849	YALI0_F16984g	-	-	-	YALI0F16984p [Yarrowia lipolytica CLIB122]	YALI0_F16984g	YALI0F16984g	2907986
gene6444	2001.91	3685.44	318.389	0.086391	-3.53297	0	0	NC_006072.1	2340638	2341027	+	390	YALI0_F17512g	GO:0003735;GO:0005762;GO:0005840;GO:0006412;GO:0015934;GO:0070180	-	-	mitochondrial 54S ribosomal protein YmL38/YmL34 [Yarrowia lipolytica CLIB122]	YALI0_F17512g	YALI0F17512g	2908275
gene6448	1509.88	2922.94	96.81	0.0331207	-4.91612	0	0	NC_006072.1	2345554	2346267	+	714	YALI0_F17600g	GO:0003735;GO:0005739	K17440	-	YALI0F17600p [Yarrowia lipolytica CLIB122]	YALI0_F17600g	YALI0F17600g	2909036
gene6552	3499.22	6813.37	185.071	0.0271629	-5.20222	0	0	NC_006072.1	2648489	2650306	+	1818	YALI0_F19866g	GO:0003333;GO:0006865;GO:0015171;GO:0016020;GO:0016021;GO:0022857;GO:0055085	-	-	YALI0F19866p [Yarrowia lipolytica CLIB122]	YALI0_F19866g	YALI0F19866g	2908302
gene6687	2905.92	5494.14	317.699	0.0578251	-4.11216	0	0	NC_006072.1	3011092	3011787	-	696	YALI0_F22935g	GO:0003735;GO:0005739;GO:0005840;GO:0006412	K02946	-	YALI0F22935p [Yarrowia lipolytica CLIB122]	YALI0_F22935g	YALI0F22935g	2908797
gene6745	8774.11	15607.4	1940.81	0.124352	-3.0075	0	0	NC_006072.1	3167255	3168040	-	786	YALI0_F24255g	-	-	-	YALI0F24255p [Yarrowia lipolytica CLIB122]	YALI0_F24255g	YALI0F24255g	2908720
gene6750	2127.76	3789.96	465.564	0.122841	-3.02513	0	0	NC_006072.1	3175216	3175761	+	546	YALI0_F24365g	GO:0003735;GO:0005622;GO:0005762;GO:0005840;GO:0006412	-	-	YALI0F24365p [Yarrowia lipolytica CLIB122]	YALI0_F24365g	YALI0F24365g	2908715
gene6751	18313.4	28946.1	7680.69	0.265345	-1.91406	0	0	NC_006072.1	3176800	3178086	+	1287	YALI0_F24387g	GO:0000166;GO:0003746;GO:0003924;GO:0005525;GO:0005622;GO:0005739;GO:0006414;GO:0070125	K02358	-	YALI0F24387p [Yarrowia lipolytica CLIB122]	YALI0_F24387g	YALI0F24387g	2908716
gene6762	4023.78	7373.08	674.479	0.0914786	-3.45042	0	0	NC_006072.1	3199419	3200966	-	1548	YALI0_F24651g	GO:0005743;GO:0006784;GO:0016020;GO:0016021;GO:0016627;GO:0016653;GO:0055114	K02259	-	YALI0F24651p [Yarrowia lipolytica CLIB122]	YALI0_F24651g	YALI0F24651g	2908472
gene6958	2496.63	4247.51	745.755	0.175575	-2.50984	0	0	NC_006072.1	3676758	3677405	+	648	YALI0_F29183g	GO:0005744;GO:0008320;GO:0030150;GO:0031305	K17794	-	YALI0F29183p [Yarrowia lipolytica CLIB122]	YALI0_F29183g	YALI0F29183g	2908787
gene7004	2580.87	4347.4	814.345	0.187318	-2.41644	0	0	NC_006072.1	3789925	3791217	+	1293	YALI0_F30327g	GO:0005515;GO:0005634;GO:0016279;GO:0018026	-	-	YALI0F30327p [Yarrowia lipolytica CLIB122]	YALI0_F30327g	YALI0F30327g	2908555
gene7079	2969.27	5241.33	697.199	0.133019	-2.91029	0	0	NC_006072.1	3964994	3966328	+	1167	YALI0_F32021g	GO:0016020;GO:0016021;GO:0031305;GO:0032977;GO:0032979;GO:0033617;GO:0051205	K03217	-	YALI0F32021p [Yarrowia lipolytica CLIB122]	YALI0_F32021g	YALI0F32021g	2908124
gene808	3419.09	6230.96	607.221	0.0974524	-3.35916	0	0	NC_006067.1	2206388	2207293	+	906	YALI0_A20526g	GO:0003735;GO:0005622;GO:0005739;GO:0005840;GO:0006412	K02895	-	YALI0A20526p [Yarrowia lipolytica CLIB122]	YALI0_A20526g	YALI0A20526g	2906267
gene901	2642.67	4679.97	605.383	0.129356	-2.95058	0	0	NC_006068.1	228679	230970	-	2292	YALI0_B01364g	GO:0003861;GO:0008652;GO:0009082;GO:0009098;GO:0009316;GO:0016829;GO:0051539	K01702	[EC:4.2.1.33]	YALI0B01364p [Yarrowia lipolytica CLIB122]	YALI0_B01364g	YALI0B01364g	2907408
gene925	2287.61	4021.64	553.579	0.13765	-2.86092	0	0	NC_006068.1	284621	285514	+	894	YALI0_B01892g	GO:0000027;GO:0003735;GO:0005840;GO:0006412;GO:0022625	K02931	-	YALI0B01892p [Yarrowia lipolytica CLIB122]	YALI0_B01892g	YALI0B01892g	2907255
gene114	1426.63	2513.4	339.865	0.135222	-2.8866	0	0	NC_006067.1	341365	341730	+	366	YALI0_A02849g	GO:0003735;GO:0005762;GO:0006412	K17422	-	YALI0A02849p [Yarrowia lipolytica CLIB122]	YALI0_A02849g	YALI0A02849g	2905972
gene6474	779.632	1460.51	98.7492	0.0676126	-3.88656	0	0	NC_006072.1	2417781	2418101	-	321	YALI0_F18150g	GO:0003735;GO:0005762	K17435	-	mitochondrial 54S ribosomal protein YmL37 [Yarrowia lipolytica CLIB122]	YALI0_F18150g	YALI0F18150g	2908667
gene1220	814.684	1517.02	112.35	0.0740595	-3.75517	0	2e-307	NC_006068.1	1243130	1243666	+	537	YALI0_B09075g	GO:0003735;GO:0005762	-	-	YALI0B09075p [Yarrowia lipolytica CLIB122]	YALI0_B09075g	YALI0B09075g	2907234
gene5383	624.317	1195.76	52.8734	0.0442174	-4.49924	3e-308	1e-306	NC_006071.1	3446665	3448248	+	1584	YALI0_E29139g	GO:0000166;GO:0004812;GO:0004831;GO:0005524;GO:0005737;GO:0005739;GO:0005829;GO:0006412;GO:0006418;GO:0006437;GO:0016874;GO:0043039	K01866	[EC:6.1.1.1]	YALI0E29139p [Yarrowia lipolytica CLIB122]	YALI0_E29139g	YALI0E29139g	2911857
gene4877	1298.51	2303.39	293.626	0.127476	-2.97171	7e-308	2e-306	NC_006071.1	2111086	2112630	+	1545	YALI0_E17919g	GO:0000049;GO:0000166;GO:0004812;GO:0004818;GO:0005524;GO:0006412;GO:0006424;GO:0008270;GO:0016874;GO:0043039	K01885	[EC:6.1.1.17]	YALI0E17919p [Yarrowia lipolytica CLIB122]	YALI0_E17919g	YALI0E17919g	2911691
gene2519	1251.73	2222.51	280.963	0.126417	-2.98374	1e-302	3e-301	NC_006069.1	2134997	2136331	-	1335	YALI0_C15290g	GO:0005525;GO:0005737;GO:0016887	K06942	-	YALI0C15290p [Yarrowia lipolytica CLIB122]	YALI0_C15290g	YALI0C15290g	2909356
gene2731	1514.69	2633.74	395.648	0.150223	-2.73482	2e-297	7e-296	NC_006069.1	2748717	2749454	+	738	YALI0_C20295g	GO:0005375;GO:0005886;GO:0006878;GO:0016020;GO:0016021;GO:0035434	K14686	-	YALI0C20295p [Yarrowia lipolytica CLIB122]	YALI0_C20295g	YALI0C20295g	2909906
gene6143	1117.28	1999.95	234.601	0.117303	-3.09169	2e-296	6e-295	NC_006072.1	1437185	1439155	+	1971	YALI0_F10725g	GO:0000166;GO:0003924;GO:0005525;GO:0005739;GO:0005743;GO:0005759;GO:0006412;GO:0016020;GO:0016787;GO:0043022;GO:0045727	K21594	[EC:3.6.5.-]	YALI0F10725p [Yarrowia lipolytica CLIB122]	YALI0_F10725g	YALI0F10725g	2908890
gene5144	993.403	1799.56	187.245	0.10405	-3.26465	7e-296	1.96914e-294	NC_006071.1	2813482	2815830	-	2349	YALI0_E23826g	GO:0005515	-	-	YALI0E23826p [Yarrowia lipolytica CLIB122]	YALI0_E23826g	YALI0E23826g	2912686
gene6446	2834.39	4685.38	983.396	0.209886	-2.25232	1.07542e-294	2.93658e-293	NC_006072.1	2342374	2343017	+	492	YALI0_F17556g	GO:0003735;GO:0005622;GO:0005840;GO:0006412	K02935	-	putative mitochondrial 54S ribosomal protein MNP1 [Yarrowia lipolytica CLIB122]	YALI0_F17556g	YALI0F17556g	2908277
gene5467	13666.8	21249.2	6084.33	0.286332	-1.80424	1.88122e-293	5.11517e-292	NC_006071.1	3649543	3651117	+	1575	YALI0_E30965g	GO:0003824;GO:0003986;GO:0005737;GO:0005739;GO:0006083;GO:0006084;GO:0008775;GO:0016787;GO:0019679;GO:0043821	K01067	[EC:3.1.2.1]	YALI0E30965p [Yarrowia lipolytica CLIB122]	YALI0_E30965g	YALI0E30965g	2911920
gene2242	1211.4	2145.89	276.907	0.129041	-2.9541	8.40786e-292	2.27651e-290	NC_006069.1	1182904	1183161	+	258	YALI0_C08723g	GO:0003735;GO:0005739;GO:0006412;GO:0015934	K02907	-	mitochondrial 54S ribosomal protein YmL33 [Yarrowia lipolytica CLIB122]	YALI0_C08723g	YALI0C08723g	2910013
gene2532	5118.37	8182.02	2054.71	0.251125	-1.99352	2.3149e-291	6.24149e-290	NC_006069.1	2186685	2188220	-	1536	YALI0_C15554g	GO:0003824;GO:0004417;GO:0004789;GO:0009228;GO:0016310	K14154	-	YALI0C15554p [Yarrowia lipolytica CLIB122]	YALI0_C15554g	YALI0C15554g	2909412
gene5930	30563.3	46949.7	14176.9	0.30196	-1.72757	8.47483e-291	2.27544e-289	NC_006072.1	882439	884412	-	1974	YALI0_F05962g	GO:0000166;GO:0003824;GO:0003987;GO:0005524;GO:0016208;GO:0016874;GO:0019427	K01895	[EC:6.2.1.1]	acetate--CoA ligase [Yarrowia lipolytica CLIB122]	YALI0_F05962g	YALI0F05962g	2908441
gene5874	1511.85	2619.52	404.187	0.154298	-2.69621	1.53914e-290	4.11527e-289	NC_006072.1	730470	731828	-	1359	YALI0_F04708g	GO:0003677;GO:0003723;GO:0005730;GO:0042273;GO:0042274	-	-	YALI0F04708p [Yarrowia lipolytica CLIB122]	YALI0_F04708g	YALI0F04708g	2908591
gene4578	1134.67	2082.92	186.413	0.0894962	-3.48203	2.52822e-288	6.67638e-287	NC_006071.1	1351308	1351920	+	423	YALI0_E11033g	GO:0003735;GO:0005762;GO:0032543	K17424	-	YALI0E11033p [Yarrowia lipolytica CLIB122]	YALI0_E11033g	YALI0E11033g	2912736
gene150	6241.61	12088.8	394.423	0.0326272	-4.93778	4.19939e-287	1.10441e-285	NC_006067.1	414340	414972	+	633	YALI0_A03817g	-	-	-	YALI0A03817p [Yarrowia lipolytica CLIB122]	YALI0_A03817g	YALI0A03817g	2906298
gene6607	397.148	787.628	6.66728	0.008465	-6.88427	7.17009e-285	1.87798e-283	NC_006072.1	2804958	2806496	+	1539	YALI0_F21109g	GO:0005887;GO:0016020;GO:0016021;GO:0022857;GO:0031224;GO:0055085	-	-	YALI0F21109p [Yarrowia lipolytica CLIB122]	YALI0_F21109g	YALI0F21109g	2908278
gene6746	1641.8	2938.73	344.865	0.117352	-3.09109	5.33793e-284	1.38119e-282	NC_006072.1	3168874	3169443	-	570	YALI0_F24277g	GO:0005375;GO:0005886;GO:0006878;GO:0016020;GO:0016021;GO:0035434	-	-	YALI0F24277p [Yarrowia lipolytica CLIB122]	YALI0_F24277g	YALI0F24277g	2908721
gene5881	944.292	1708.27	180.309	0.10555	-3.244	2.41408e-283	6.22136e-282	NC_006072.1	746842	750342	-	3501	YALI0_F04884g	GO:0005743	-	-	YALI0F04884p [Yarrowia lipolytica CLIB122]	YALI0_F04884g	YALI0F04884g	2908607
gene3448	826.096	1512.82	139.37	0.0921256	-3.44025	5.65319e-279	1.42261e-277	NC_006070.1	1484025	1486235	-	2211	YALI0_D11990g	GO:0005525	-	-	YALI0D11990p [Yarrowia lipolytica CLIB122]	YALI0_D11990g	YALI0D11990g	2910607
gene2281	4515.1	7208.06	1822.15	0.252794	-1.98397	1.09045e-278	2.73337e-277	NC_006069.1	1301073	1302236	-	1164	YALI0_C09526g	GO:0003723	K18757	-	YALI0C09526p [Yarrowia lipolytica CLIB122]	YALI0_C09526g	YALI0C09526g	2909769
gene1682	31175.9	47471.6	14880.3	0.313456	-1.67366	2.45716e-274	5.99528e-273	NC_006068.1	2563100	2569046	+	5553	YALI0_B19382g	GO:0000287;GO:0003824;GO:0004312;GO:0004315;GO:0004316;GO:0004321;GO:0005835;GO:0006633;GO:0008897;GO:0016740;GO:0042759;GO:0046872;GO:0055114;GO:0102131;GO:0102132	K00667	[EC:2.3.1.86]	YALI0B19382p [Yarrowia lipolytica CLIB122]	YALI0_B19382g	YALI0B19382g	2907422
gene422	44596.3	67716.7	21475.9	0.317143	-1.65679	2.74274e-274	6.66672e-273	NC_006067.1	1109161	1110069	-	909	YALI0_A10659g	GO:0005471;GO:0005743;GO:0015866;GO:0015867;GO:0016020;GO:0016021;GO:0022857;GO:0055085	K05863	-	ADP/ATP carrier protein [Yarrowia lipolytica CLIB122]	YALI0_A10659g	YALI0A10659g	2906577
gene4714	785.235	1437.47	133	0.0925237	-3.43403	2.80366e-268	6.71308e-267	NC_006071.1	1696811	1698427	-	1617	YALI0_E14102g	GO:0000166;GO:0003824;GO:0005524;GO:0005739;GO:0006629;GO:0006655;GO:0008444;GO:0008654;GO:0016740;GO:0032049	K00995	[EC:2.7.8.5]	YALI0E14102p [Yarrowia lipolytica CLIB122]	YALI0_E14102g	YALI0E14102g	2911499
gene3968	3956.03	6312.17	1599.88	0.25346	-1.98017	3.46757e-266	8.18066e-265	NC_006070.1	3221312	3223030	-	1719	YALI0_D24343g	GO:0005739;GO:0005743;GO:0015031;GO:0016020;GO:0016021	K17792	-	YALI0D24343p [Yarrowia lipolytica CLIB122]	YALI0_D24343g	YALI0D24343g	2910343
gene3544	9796.59	15116.2	4476.92	0.296166	-1.75552	5.03961e-266	1.18459e-264	NC_006070.1	1747075	1747785	-	711	YALI0_D14322g	GO:0004733;GO:0008615;GO:0010181;GO:0016638;GO:0042823;GO:0048037;GO:0055114	K00275	[EC:1.4.3.5]	YALI0D14322p [Yarrowia lipolytica CLIB122]	YALI0_D14322g	YALI0D14322g	2910236
gene6832	1693.87	2862.95	524.786	0.183303	-2.4477	8.33574e-265	1.94511e-263	NC_006072.1	3371009	3371248	-	240	YALI0_F26213g	-	-	-	YALI0F26213p [Yarrowia lipolytica CLIB122]	YALI0_F26213g	YALI0F26213g	2908589
gene5558	895.532	1611.94	179.129	0.111127	-3.16972	1.93505e-264	4.49898e-263	NC_006071.1	3882179	3882535	-	357	YALI0_E32747g	GO:0005739;GO:0005840	-	-	YALI0E32747p [Yarrowia lipolytica CLIB122]	YALI0_E32747g	YALI0E32747g	2911904
gene356	3400.95	5461.38	1340.52	0.245454	-2.02647	6.08172e-263	1.40383e-261	NC_006067.1	890600	891997	-	1398	YALI0_A09042g	GO:0004497;GO:0005739;GO:0005743;GO:0006744;GO:0016020;GO:0016491;GO:0016709;GO:0016712;GO:0031314;GO:0050660;GO:0055114;GO:0071949	K06126	[EC:1.14.13.-]	YALI0A09042p [Yarrowia lipolytica CLIB122]	YALI0_A09042g	YALI0A09042g	2906060
gene1837	3679.11	5878.94	1479.27	0.251622	-1.99067	4.34236e-262	9.95176e-261	NC_006068.1	2998628	2999317	-	690	YALI0_B22836g	GO:0005739;GO:0006397	-	-	YALI0B22836p [Yarrowia lipolytica CLIB122]	YALI0_B22836g	YALI0B22836g	2907068
gene3851	1773.6	2969.83	577.371	0.194412	-2.36281	3.52283e-256	8.01632e-255	NC_006070.1	2736702	2737019	+	318	YALI0_D21626g	GO:0003735;GO:0005622;GO:0005763;GO:0005840;GO:0006412	K02954	-	YALI0D21626p [Yarrowia lipolytica CLIB122]	YALI0_D21626g	YALI0D21626g	2910272
gene5113	1692.81	2844.66	540.963	0.190168	-2.39465	1.60237e-255	3.63336e-254	NC_006071.1	2728480	2728986	+	507	YALI0_E23199g	GO:0003735;GO:0005840;GO:0006412	-	-	YALI0E23199p [Yarrowia lipolytica CLIB122]	YALI0_E23199g	YALI0E23199g	2912929
gene4737	892.379	1610.94	173.818	0.107898	-3.21226	4.05597e-255	9.16449e-254	NC_006071.1	1746279	1746701	-	423	YALI0_E14641g	GO:0003735;GO:0005762;GO:0032543	-	-	YALI0E14641p [Yarrowia lipolytica CLIB122]	YALI0_E14641g	YALI0E14641g	2911526
gene1757	4538.96	7142.69	1935.22	0.270937	-1.88397	5.04196e-254	1.12733e-252	NC_006068.1	2771519	2773381	+	1863	YALI0_B21098g	GO:0005506;GO:0005737;GO:0006449;GO:0016491;GO:0016705;GO:0016706;GO:0019511;GO:0031418;GO:0031543;GO:0055114	-	-	YALI0B21098p [Yarrowia lipolytica CLIB122]	YALI0_B21098g	YALI0B21098g	2906796
gene2637	2393.81	3902.06	885.562	0.226947	-2.13957	1.37332e-250	2.98733e-249	NC_006069.1	2505351	2506265	-	915	YALI0_C18227g	GO:0005739;GO:0034551;GO:0070131	K17662	-	YALI0C18227p [Yarrowia lipolytica CLIB122]	YALI0_C18227g	YALI0C18227g	2909993
gene4908	14247.7	21582.1	6913.27	0.320324	-1.6424	1.0737e-247	2.31984e-246	NC_006071.1	2218639	2220528	+	1890	YALI0_E18634g	GO:0004470;GO:0004471;GO:0005739;GO:0006090;GO:0006108;GO:0046872;GO:0051287;GO:0055114	K00027	[EC:1.1.1.38]	YALI0E18634p [Yarrowia lipolytica CLIB122]	YALI0_E18634g	YALI0E18634g	2911725
gene411	7043.38	10838.3	3248.49	0.299724	-1.7383	1.55706e-245	3.33056e-244	NC_006067.1	1055477	1058014	+	2538	YALI0_A10362g	GO:0004366;GO:0006072;GO:0006631;GO:0008374;GO:0008654;GO:0016746;GO:0019432;GO:0031966;GO:0044255	-	-	YALI0A10362p [Yarrowia lipolytica CLIB122]	YALI0_A10362g	YALI0A10362g	2905951
gene1118	2826.76	4536.55	1116.98	0.246217	-2.022	4.84313e-244	1.02231e-242	NC_006068.1	885434	886544	+	471	YALI0_B06578g	GO:0003676;GO:0003723;GO:0003735;GO:0005622;GO:0005739;GO:0005840;GO:0006412	K02952	-	putative mitochondrial 37S ribosomal protein SWS2 [Yarrowia lipolytica CLIB122]	YALI0_B06578g	YALI0B06578g	2906804
gene5798	1100	1908.41	291.581	0.152787	-2.7104	7.21738e-241	1.49883e-239	NC_006072.1	425515	425958	-	444	YALI0_F03047g	GO:0005739;GO:0005743;GO:0005744;GO:0015031;GO:0016020;GO:0030150	K17805	-	YALI0F03047p [Yarrowia lipolytica CLIB122]	YALI0_F03047g	YALI0F03047g	2907756
gene6975	906.339	1604.36	208.317	0.129844	-2.94515	6.60229e-240	1.36667e-238	NC_006072.1	3725320	3725863	-	294	YALI0_F29678g	GO:0003735;GO:0005762	K17434	-	YALI0F29678p [Yarrowia lipolytica CLIB122]	YALI0_F29678g	YALI0F29678g	7009646
gene5766	1361.11	2299.53	422.683	0.183813	-2.44369	2.81411e-233	5.76937e-232	NC_006072.1	350075	352531	-	2457	YALI0_F02299g	GO:0000166;GO:0002161;GO:0004812;GO:0004823;GO:0005524;GO:0005739;GO:0006412;GO:0006418;GO:0006429;GO:0016874;GO:0032543;GO:0106074	K01869	[EC:6.1.1.4]	YALI0F02299p [Yarrowia lipolytica CLIB122]	YALI0_F02299g	YALI0F02299g	2908128
gene5484	1646.43	2725.86	566.994	0.208006	-2.26531	2.60808e-229	5.29622e-228	NC_006071.1	3692002	3692478	-	477	YALI0_E31317g	GO:0003735;GO:0005840;GO:0006412;GO:0022627	K02994	-	mitochondrial 37S ribosomal protein MRPS8 [Yarrowia lipolytica CLIB122]	YALI0_E31317g	YALI0E31317g	2911463
gene6721	1570.67	2608.98	532.35	0.204045	-2.29304	3.87423e-228	7.7934e-227	NC_006072.1	3113890	3115305	+	1416	YALI0_F23727g	GO:0005739;GO:0006783;GO:0008495;GO:0016020;GO:0016021;GO:0016740;GO:0016765;GO:0031966;GO:0045333;GO:0048034	K02257	[EC:2.5.1.141]	YALI0F23727p [Yarrowia lipolytica CLIB122]	YALI0_F23727g	YALI0F23727g	2908754
gene4281	840.293	1487.9	192.683	0.1295	-2.94898	7.35062e-228	1.47403e-226	NC_006071.1	475243	476784	-	1542	YALI0_E04224g	GO:0005829;GO:0008902;GO:0008972;GO:0009228;GO:0016310	K00877	-	YALI0E04224p [Yarrowia lipolytica CLIB122]	YALI0_E04224g	YALI0E04224g	2912185
gene1238	5584.56	8562.3	2606.81	0.304452	-1.71571	7.64179e-227	1.50421e-225	NC_006068.1	1291751	1292746	+	996	YALI0_B09471g	GO:0016020	-	-	YALI0B09471p [Yarrowia lipolytica CLIB122]	YALI0_B09471g	YALI0B09471g	2907590
gene1092	1240.5	2104.45	376.56	0.178935	-2.48249	2.81234e-226	5.50207e-225	NC_006068.1	792124	793536	+	1413	YALI0_B05918g	GO:0000049;GO:0000166;GO:0004812;GO:0004828;GO:0005524;GO:0005739;GO:0006418;GO:0006434;GO:0070158	K01875	[EC:6.1.1.11]	YALI0B05918p [Yarrowia lipolytica CLIB122]	YALI0_B05918g	YALI0B05918g	2907208
gene3730	899.036	1577.89	220.179	0.13954	-2.84125	5.5261e-226	1.07784e-224	NC_006070.1	2368788	2370239	-	1452	YALI0_D18766g	-	-	-	YALI0D18766p [Yarrowia lipolytica CLIB122]	YALI0_D18766g	YALI0D18766g	2911137
gene5650	42727.4	63063.1	22391.6	0.355067	-1.49384	6.29788e-225	1.21727e-223	NC_006071.1	4145690	4147642	-	1953	YALI0_E34793g	GO:0003824;GO:0003878;GO:0005829;GO:0006085;GO:0006633;GO:0046912;GO:0048037	K01648	[EC:2.3.3.8]	YALI0E34793p [Yarrowia lipolytica CLIB122]	YALI0_E34793g	YALI0E34793g	2912101
gene6985	1050.48	1916.93	184.02	0.0959972	-3.38086	7.21348e-223	1.37765e-221	NC_006072.1	3749044	3749651	+	369	YALI0_F29931g	GO:0042721;GO:0045039	K17790	-	YALI0F29931p [Yarrowia lipolytica CLIB122]	YALI0_F29931g	YALI0F29931g	2908292
gene4509	16069.3	23919.1	8219.45	0.343635	-1.54105	7.6562e-223	1.45786e-221	NC_006071.1	1145093	1151653	-	6561	YALI0_E09493g	GO:0000166;GO:0004070;GO:0004088;GO:0004151;GO:0005524;GO:0005737;GO:0005829;GO:0006207;GO:0006228;GO:0006520;GO:0006541;GO:0006807;GO:0016597;GO:0016743;GO:0019240;GO:0046872	K11541	-	YALI0E09493p [Yarrowia lipolytica CLIB122]	YALI0_E09493g	YALI0E09493g	2912535
gene1986	2305.04	3694.43	915.65	0.247846	-2.01248	1.37896e-221	2.61798e-220	NC_006069.1	392003	393400	+	1398	YALI0_C02849g	GO:0004721;GO:0006470;GO:0016311;GO:0016791	K17617	[EC:3.1.3.16]	YALI0C02849p [Yarrowia lipolytica CLIB122]	YALI0_C02849g	YALI0C02849g	2909077
gene4112	5578.96	8520.97	2636.94	0.309465	-1.69215	4.14537e-221	7.82378e-220	NC_006071.1	47002	49563	-	2562	YALI0_E00484g	-	-	-	YALI0E00484p [Yarrowia lipolytica CLIB122]	YALI0_E00484g	YALI0E00484g	2912880
gene6912	762.863	1359.08	166.65	0.12262	-3.02773	1.21078e-220	2.2718e-219	NC_006072.1	3566429	3568255	+	1827	YALI0_F27995g	GO:0001510;GO:0003723;GO:0005739;GO:0006396;GO:0008168;GO:0008173;GO:0032259	K15507	[EC:2.1.1.-]	YALI0F27995p [Yarrowia lipolytica CLIB122]	YALI0_F27995g	YALI0F27995g	2908343
gene6878	5707.86	8705.87	2709.85	0.311266	-1.68378	1.96879e-220	3.67259e-219	NC_006072.1	3462601	3463389	-	789	YALI0_F27247g	GO:0005739;GO:0005743;GO:0006744;GO:0016020;GO:0031314	K18586	-	YALI0F27247p [Yarrowia lipolytica CLIB122]	YALI0_F27247g	YALI0F27247g	2907824
gene3337	2761.55	4365.71	1157.39	0.26511	-1.91534	1.46881e-219	2.73199e-218	NC_006070.1	1214450	1216135	+	1686	YALI0_D09603g	GO:0003756;GO:0005783;GO:0005789;GO:0015035;GO:0016671;GO:0034975;GO:0055114	-	-	YALI0D09603p [Yarrowia lipolytica CLIB122]	YALI0_D09603g	YALI0D09603g	2910913
gene1402	584.509	1072.51	96.5093	0.0899847	-3.47418	9.15859e-218	1.69368e-216	NC_006068.1	1781683	1784502	+	2820	YALI0_B13222g	GO:0000959;GO:0000964;GO:0005739;GO:0005740	-	-	YALI0B13222p [Yarrowia lipolytica CLIB122]	YALI0_B13222g	YALI0B13222g	2907530
gene5908	678.811	1221.26	136.366	0.111661	-3.16281	3.13575e-215	5.7165e-214	NC_006072.1	821397	822482	-	1086	YALI0_F05500g	GO:0015218;GO:0016020;GO:0016021;GO:0022857;GO:0055085;GO:1990519	K15116	-	YALI0F05500p [Yarrowia lipolytica CLIB122]	YALI0_F05500g	YALI0F05500g	2907930
gene4178	791.625	1396.99	186.262	0.133331	-2.90692	9.51982e-214	1.72567e-212	NC_006071.1	206144	206545	+	315	YALI0_E01914g	GO:0003735;GO:0005739;GO:0005762;GO:0005840;GO:0032543	-	-	mitochondrial 54S ribosomal protein YmL31 [Yarrowia lipolytica CLIB122]	YALI0_E01914g	YALI0E01914g	2912072
gene6549	2264.04	3606.81	921.273	0.255426	-1.96902	2.29624e-211	4.1507e-210	NC_006072.1	2635550	2636989	-	1440	YALI0_F19800g	GO:0008641;GO:0061503;GO:0061504	K22132	-	YALI0F19800p [Yarrowia lipolytica CLIB122]	YALI0_F19800g	YALI0F19800g	2908299
gene2026	611.832	1111.37	112.291	0.101038	-3.30704	2.6487e-211	4.77435e-210	NC_006069.1	496747	497637	+	891	YALI0_C03718g	-	-	-	YALI0C03718p [Yarrowia lipolytica CLIB122]	YALI0_C03718g	YALI0C03718g	2909914
gene5943	2385.66	3778.35	992.978	0.262807	-1.92792	2.00945e-208	3.59182e-207	NC_006072.1	928855	929385	+	531	YALI0_F06226g	-	-	-	YALI0F06226p [Yarrowia lipolytica CLIB122]	YALI0_F06226g	YALI0F06226g	2908418
gene878	2895.79	4509.34	1282.24	0.284352	-1.81425	3.4449e-203	6.00705e-202	NC_006068.1	138252	139364	-	1113	YALI0_B00836g	GO:0000287;GO:0002189;GO:0004749;GO:0005737;GO:0006015;GO:0006164;GO:0009116;GO:0009156;GO:0009165;GO:0031505;GO:0044249	K00948	[EC:2.7.6.1]	YALI0B00836p [Yarrowia lipolytica CLIB122]	YALI0_B00836g	YALI0B00836g	2906609
gene1349	820.79	1430.05	211.53	0.147918	-2.75713	1.06633e-202	1.84936e-201	NC_006068.1	1605178	1607874	-	2697	YALI0_B11968g	GO:0000166;GO:0003676;GO:0003723;GO:0004386;GO:0005524;GO:0005730;GO:0016787;GO:0045943	K14781	[EC:3.6.4.13]	YALI0B11968p [Yarrowia lipolytica CLIB122]	YALI0_B11968g	YALI0B11968g	2907507
gene3150	846.972	1482.65	211.293	0.14251	-2.81087	1.28005e-202	2.21404e-201	NC_006070.1	710072	711598	-	1527	YALI0_D05489g	GO:0002939;GO:0005634;GO:0005737;GO:0005739;GO:0005759;GO:0008033;GO:0008168;GO:0008175;GO:0009019;GO:0016740;GO:0030488;GO:0032259;GO:0052906;GO:0070901	K15429	[EC:2.1.1.228]	YALI0D05489p [Yarrowia lipolytica CLIB122]	YALI0_D05489g	YALI0D05489g	2911026
gene2430	1535.48	2504.89	566.066	0.225984	-2.14571	2.62733e-201	4.49589e-200	NC_006069.1	1804301	1806007	-	1707	YALI0_C13090g	GO:0004335;GO:0005524;GO:0005534;GO:0005737;GO:0005829;GO:0006012;GO:0033499;GO:0046835	K00849	[EC:2.7.1.6]	YALI0C13090p [Yarrowia lipolytica CLIB122]	YALI0_C13090g	YALI0C13090g	2909558
gene696	3776.96	5782.66	1771.27	0.306306	-1.70695	1.75639e-200	2.99755e-199	NC_006067.1	1861889	1863739	+	1851	YALI0_A17941g	GO:0000054;GO:0000166;GO:0005506;GO:0005524;GO:0005623;GO:0006413;GO:0006415;GO:0016887;GO:0043024	K06174	-	YALI0A17941p [Yarrowia lipolytica CLIB122]	YALI0_A17941g	YALI0A17941g	2906445
gene4517	1546.39	2506.57	586.206	0.233868	-2.09623	3.83957e-194	6.46681e-193	NC_006071.1	1181475	1181795	+	321	YALI0_E09691g	GO:0003735;GO:0005622;GO:0005763;GO:0005840;GO:0006412	K02959	-	mitochondrial 37S ribosomal protein MRPS16 [Yarrowia lipolytica CLIB122]	YALI0_E09691g	YALI0E09691g	2912563
gene7046	10054.8	14796.5	5313.11	0.359078	-1.47763	1.09516e-193	1.8397e-192	NC_006072.1	3888867	3890000	+	1134	YALI0_F31207g	GO:0005741;GO:0005742;GO:0008320;GO:0030150;GO:0055085	K11518	-	YALI0F31207p [Yarrowia lipolytica CLIB122]	YALI0_F31207g	YALI0F31207g	2907649
gene6663	3039.5	4785.54	1293.47	0.270286	-1.88744	2.03871e-191	3.39802e-190	NC_006072.1	2964450	2965150	-	354	YALI0_F22363g	GO:0005739;GO:0005743	K18172	-	YALI0F22363p [Yarrowia lipolytica CLIB122]	YALI0_F22363g	YALI0F22363g	2908817
gene3599	1002.11	1691.06	313.155	0.185182	-2.43298	4.09976e-191	6.78045e-190	NC_006070.1	1910615	1911952	+	1338	YALI0_D15620g	GO:0000166;GO:0004812;GO:0004827;GO:0005524;GO:0005737;GO:0005739;GO:0006418;GO:0006433	K01881	[EC:6.1.1.15]	YALI0D15620p [Yarrowia lipolytica CLIB122]	YALI0_D15620g	YALI0D15620g	2910171
gene3152	2550.28	4678.73	421.823	0.0901576	-3.47141	7.1932e-190	1.18356e-188	NC_006070.1	713611	714744	-	1134	YALI0_D05533g	-	K17803	[EC:2.1.1.-]	YALI0D05533p [Yarrowia lipolytica CLIB122]	YALI0_D05533g	YALI0D05533g	2911028
gene4450	4172.89	6503.36	1842.42	0.283302	-1.81958	2.35411e-187	3.79555e-186	NC_006071.1	956673	958208	-	1536	YALI0_E08162g	GO:0004499;GO:0050660;GO:0050661;GO:0055114	-	-	YALI0E08162p [Yarrowia lipolytica CLIB122]	YALI0_E08162g	YALI0E08162g	2912478
gene6114	1592.82	2559.82	625.821	0.244479	-2.03222	2.55557e-187	4.11004e-186	NC_006072.1	1358837	1359508	-	672	YALI0_F10054g	GO:0016020;GO:0016021;GO:0031305;GO:0033617	K18173	-	YALI0F10054p [Yarrowia lipolytica CLIB122]	YALI0_F10054g	YALI0F10054g	2908995
gene798	623.691	1108.51	138.876	0.125282	-2.99675	4.85194e-187	7.78372e-186	NC_006067.1	2182092	2184314	-	2223	YALI0_A20328g	GO:0000166;GO:0003676;GO:0003723;GO:0003724;GO:0004386;GO:0005524;GO:0005634;GO:0005730;GO:0006364;GO:0016787;GO:0042254	K14776	[EC:3.6.4.13]	YALI0A20328p [Yarrowia lipolytica CLIB122]	YALI0_A20328g	YALI0A20328g	2906391
gene5151	4770.67	7139.32	2402.02	0.336449	-1.57154	7.15075e-185	1.14145e-183	NC_006071.1	2847670	2848950	-	1281	YALI0_E23991g	GO:0003951;GO:0006741;GO:0016310;GO:0019674	-	-	YALI0E23991p [Yarrowia lipolytica CLIB122]	YALI0_E23991g	YALI0E23991g	2912693
gene6726	1425.09	2304.09	546.086	0.237007	-2.077	1.20845e-182	1.92423e-181	NC_006072.1	3127291	3128178	-	888	YALI0_F23837g	GO:0005739;GO:0008654;GO:0008808;GO:0016020;GO:0016021;GO:0016740;GO:0016780;GO:0032049;GO:0046474	K08744	[EC:2.7.8.41]	YALI0F23837p [Yarrowia lipolytica CLIB122]	YALI0_F23837g	YALI0F23837g	2908748
gene7057	675.754	1183.59	167.918	0.141872	-2.81734	8.9505e-182	1.41466e-180	NC_006072.1	3907920	3911333	-	3414	YALI0_F31449g	GO:0005730;GO:0042254	K14862	-	YALI0F31449p [Yarrowia lipolytica CLIB122]	YALI0_F31449g	YALI0F31449g	2907947
gene6065	560.184	1003.53	116.835	0.116424	-3.10254	6.10904e-181	9.58477e-180	NC_006072.1	1246439	1247659	-	1221	YALI0_F08921g	GO:0005737;GO:0006400;GO:0008033;GO:0008479;GO:0016740;GO:0016757;GO:0016763;GO:0046872;GO:0101030	K00773	[EC:2.4.2.29]	YALI0F08921p [Yarrowia lipolytica CLIB122]	YALI0_F08921g	YALI0F08921g	2908095
gene2158	16945	24459	9430.93	0.38558	-1.3749	1.36499e-180	2.13638e-179	NC_006069.1	903864	905333	+	1470	YALI0_C06776g	GO:0003824;GO:0004333;GO:0005739;GO:0006099;GO:0006106;GO:0006108;GO:0016829;GO:0045239	K01679	[EC:4.2.1.2]	YALI0C06776p [Yarrowia lipolytica CLIB122]	YALI0_C06776g	YALI0C06776g	2909222
gene1528	1643.06	2617.36	668.77	0.255514	-1.96853	4.06325e-180	6.344e-179	NC_006068.1	2120265	2121656	-	1392	YALI0_B16016g	-	-	-	YALI0B16016p [Yarrowia lipolytica CLIB122]	YALI0_B16016g	YALI0B16016g	2906792
gene6151	477.484	872.169	82.7997	0.0949353	-3.39691	6.08307e-180	9.47452e-179	NC_006072.1	1458394	1462287	-	3894	YALI0_F10945g	-	-	-	YALI0F10945p [Yarrowia lipolytica CLIB122]	YALI0_F10945g	YALI0F10945g	2907803
gene5835	1448.71	2331.81	565.6	0.242558	-2.0436	3.02734e-179	4.68108e-178	NC_006072.1	576042	579393	-	2271	YALI0_F03883g	-	K06100	-	YALI0F03883p [Yarrowia lipolytica CLIB122]	YALI0_F03883g	YALI0F03883g	2907716
gene5091	482.84	924.261	41.4196	0.0448138	-4.47991	5.17804e-179	7.98737e-178	NC_006071.1	2684592	2685817	+	1170	YALI0_E22759g	GO:0003747;GO:0005739;GO:0006415;GO:0016149;GO:0043022;GO:0070126	K02835	-	YALI0E22759p [Yarrowia lipolytica CLIB122]	YALI0_E22759g	YALI0E22759g	2912908
gene3237	2316	3586.45	1045.56	0.291531	-1.77828	3.0092e-178	4.6307e-177	NC_006070.1	950176	951333	+	1158	YALI0_D07436g	GO:0001731;GO:0001732;GO:0003743;GO:0005092;GO:0005515;GO:0005829;GO:0006413;GO:0050790;GO:0071074	K03262	-	YALI0D07436p [Yarrowia lipolytica CLIB122]	YALI0_D07436g	YALI0D07436g	2910894
gene6477	593.71	1052.88	134.537	0.127779	-2.96828	1.0659e-177	1.62855e-176	NC_006072.1	2421328	2422659	-	1332	YALI0_F18216g	GO:0001522;GO:0003723;GO:0005634;GO:0005737;GO:0009451;GO:0009982;GO:0031119;GO:1990481	K01855	[EC:5.4.99.45]	YALI0F18216p [Yarrowia lipolytica CLIB122]	YALI0_F18216g	YALI0F18216g	2908670
gene7058	1209.6	1978.09	441.108	0.222997	-2.16491	1.43921e-177	2.18331e-176	NC_006072.1	3911571	3913232	+	1662	YALI0_F31471g	GO:0005515;GO:0032040;GO:0034388	K14553	-	YALI0F31471p [Yarrowia lipolytica CLIB122]	YALI0_F31471g	YALI0F31471g	2907891
gene1781	1233.31	2011.68	454.942	0.22615	-2.14465	5.2831e-177	7.95814e-176	NC_006068.1	2842009	2842962	-	954	YALI0_B21604g	GO:0005381;GO:0016020;GO:0016021;GO:0022857;GO:0048250;GO:0055085	K15113	-	YALI0B21604p [Yarrowia lipolytica CLIB122]	YALI0_B21604g	YALI0B21604g	2907476
gene4729	2414.6	3723.94	1105.27	0.2968	-1.75244	8.18124e-177	1.22949e-175	NC_006071.1	1729026	1730354	-	1329	YALI0_E14443g	GO:0004605;GO:0005789;GO:0006629;GO:0008654;GO:0016020;GO:0016021;GO:0016024;GO:0016740;GO:0016772;GO:0016779	K00981	[EC:2.7.7.41]	YALI0E14443p [Yarrowia lipolytica CLIB122]	YALI0_E14443g	YALI0E14443g	2911514
gene5640	723.45	1250	196.903	0.157523	-2.66637	1.22344e-175	1.83002e-174	NC_006071.1	4107663	4108125	-	381	YALI0_E34540g	GO:0005758;GO:0033617	K18183	-	YALI0E34540p [Yarrowia lipolytica CLIB122]	YALI0_E34540g	YALI0E34540g	7009594
gene1515	2597.97	3983.42	1212.53	0.304393	-1.71599	1.2853e-175	1.91808e-174	NC_006068.1	2081420	2083465	+	2046	YALI0_B15708g	GO:0003743;GO:0005085;GO:0005515;GO:0005851;GO:0006413;GO:0009058;GO:0016779;GO:0031369	K03240	-	YALI0B15708p [Yarrowia lipolytica CLIB122]	YALI0_B15708g	YALI0B15708g	2906937
gene3649	510.258	920.371	100.146	0.10881	-3.20012	2.27535e-175	3.38768e-174	NC_006070.1	2090849	2092654	-	1806	YALI0_D16929g	GO:0003735;GO:0005763;GO:0006412;GO:0008168;GO:0032259	-	-	YALI0D16929p [Yarrowia lipolytica CLIB122]	YALI0_D16929g	YALI0D16929g	2910215
gene1252	1395.22	2245.57	544.873	0.242643	-2.04309	2.4666e-175	3.65547e-174	NC_006068.1	1337687	1338910	+	1224	YALI0_B09812g	GO:0016020;GO:0016021	-	-	YALI0B09812p [Yarrowia lipolytica CLIB122]	YALI0_B09812g	YALI0B09812g	2907629
gene2795	795.656	1357.63	233.68	0.172123	-2.53849	1.81973e-174	2.67213e-173	NC_006069.1	2916568	2916897	-	330	YALI0_C21780g	GO:0005739;GO:0005743;GO:0015031;GO:0045039;GO:0046872	K17793	-	YALI0C21780p [Yarrowia lipolytica CLIB122]	YALI0_C21780g	YALI0C21780g	2909833
gene6180	3839.71	5750.53	1928.88	0.335427	-1.57593	5.12619e-174	7.49311e-173	NC_006072.1	1534357	1534935	-	579	YALI0_F11605g	GO:0008080	-	-	YALI0F11605p [Yarrowia lipolytica CLIB122]	YALI0_F11605g	YALI0F11605g	2908622
gene5621	2026.92	3157.16	896.669	0.284011	-1.81598	6.13358e-174	8.94526e-173	NC_006071.1	4053853	4055244	+	1392	YALI0_E34133g	GO:0000030;GO:0004578;GO:0005783;GO:0005789;GO:0006486;GO:0016020;GO:0016021;GO:0016740;GO:0016757;GO:0097502	K03842	[EC:2.4.1.142]	YALI0E34133p [Yarrowia lipolytica CLIB122]	YALI0_E34133g	YALI0E34133g	2911951
gene1950	942.152	1575.99	308.312	0.19563	-2.3538	8.64104e-174	1.25736e-172	NC_006069.1	263382	264524	-	1143	YALI0_C01969g	GO:0003676;GO:0003723	-	-	YALI0C01969p [Yarrowia lipolytica CLIB122]	YALI0_C01969g	YALI0C01969g	2909097
gene3067	1006.75	1671.76	341.748	0.204424	-2.29036	1.54148e-173	2.23794e-172	NC_006070.1	456397	457995	+	1599	YALI0_D03619g	GO:0000166;GO:0004812;GO:0004825;GO:0005524;GO:0005739;GO:0006412;GO:0006418;GO:0006431;GO:0016874	K01874	[EC:6.1.1.10]	YALI0D03619p [Yarrowia lipolytica CLIB122]	YALI0_D03619g	YALI0D03619g	2910581
gene2644	623.486	1094.27	152.702	0.139547	-2.84118	3.11421e-173	4.51103e-172	NC_006069.1	2527723	2529147	+	1425	YALI0_C18403g	GO:0004128;GO:0006696;GO:0016491;GO:0055114	-	-	YALI0C18403p [Yarrowia lipolytica CLIB122]	YALI0_C18403g	YALI0C18403g	2909976
gene5523	12328.3	19729.3	4927.37	0.249749	-2.00145	2.94459e-172	4.25573e-171	NC_006071.1	3809241	3809897	+	657	YALI0_E32065g	GO:0005783;GO:0006696	K09829	[EC:5.-.-.-]	YALI0E32065p [Yarrowia lipolytica CLIB122]	YALI0_E32065g	YALI0E32065g	2912114
gene6260	3288.62	4957.84	1619.4	0.326634	-1.61425	2.95436e-172	4.26025e-171	NC_006072.1	1798352	1799875	-	1524	YALI0_F13409g	GO:0003824;GO:0004175;GO:0005739;GO:0005743;GO:0006627;GO:0017087;GO:0046872	K01412	[EC:3.4.24.64]	YALI0F13409p [Yarrowia lipolytica CLIB122]	YALI0_F13409g	YALI0F13409g	2907879
gene3871	3002.21	4548.7	1455.71	0.320027	-1.64373	3.78864e-172	5.43886e-171	NC_006070.1	2814560	2815693	-	1134	YALI0_D22132g	GO:0005515;GO:0005634;GO:0006415;GO:0006417;GO:1900039;GO:2000640	-	-	YALI0D22132p [Yarrowia lipolytica CLIB122]	YALI0_D22132g	YALI0D22132g	2911046
gene3219	2624.93	4007.86	1242.01	0.309893	-1.69016	1.24274e-171	1.7761e-170	NC_006070.1	898845	899804	-	960	YALI0_D07018g	GO:0002181;GO:0005829;GO:0046872	-	-	YALI0D07018p [Yarrowia lipolytica CLIB122]	YALI0_D07018g	YALI0D07018g	2910791
gene3092	2174.01	3359.86	988.155	0.294106	-1.76559	9.16825e-171	1.30739e-169	NC_006070.1	525312	526844	-	1533	YALI0_D04202g	GO:0000030;GO:0005783;GO:0005789;GO:0006506;GO:0016020;GO:0016021;GO:0016740;GO:0016757;GO:0097502	K05286	[EC:2.4.1.-]	YALI0D04202p [Yarrowia lipolytica CLIB122]	YALI0_D04202g	YALI0D04202g	2910629
gene5724	1754.99	2797.24	712.74	0.254802	-1.97255	8.38806e-170	1.18822e-168	NC_006072.1	219956	220924	+	969	YALI0_F01408g	GO:0005886;GO:0016020;GO:0016021	K07112	-	YALI0F01408p [Yarrowia lipolytica CLIB122]	YALI0_F01408g	YALI0F01408g	2908014
gene6849	826.893	1398.39	255.396	0.182636	-2.45296	8.61481e-170	1.21765e-168	NC_006072.1	3404996	3406012	-	1017	YALI0_F26609g	GO:0004418;GO:0005737;GO:0006779;GO:0006782;GO:0006783;GO:0016740;GO:0018160;GO:0033014	K01749	[EC:2.5.1.61]	YALI0F26609p [Yarrowia lipolytica CLIB122]	YALI0_F26609g	YALI0F26609g	2908935
gene3112	987.34	1636.74	337.936	0.206468	-2.27601	1.07085e-169	1.51024e-168	NC_006070.1	579908	581491	-	1584	YALI0_D04697g	GO:0005525	K03979	[EC:3.6.5.-]	YALI0D04697p [Yarrowia lipolytica CLIB122]	YALI0_D04697g	YALI0D04697g	2910650
gene1759	422.857	819.46	26.2537	0.0320378	-4.96408	3.53958e-169	4.98103e-168	NC_006068.1	2776223	2777875	-	1653	YALI0_B21142g	GO:0000329;GO:0005887;GO:0006855;GO:0016020;GO:0016021;GO:0055085	-	-	YALI0B21142p [Yarrowia lipolytica CLIB122]	YALI0_B21142g	YALI0B21142g	2906756
gene4326	1911.88	2974.39	849.371	0.285561	-1.80813	1.41558e-167	1.97474e-166	NC_006071.1	573270	574502	+	1233	YALI0_E05225g	GO:0001054;GO:0001188;GO:0003677;GO:0003899;GO:0005634;GO:0005736;GO:0006351;GO:0006362;GO:0042790	K03005	-	YALI0E05225p [Yarrowia lipolytica CLIB122]	YALI0_E05225g	YALI0E05225g	2912285
gene6053	1156.87	1881.66	432.086	0.22963	-2.12262	2.90012e-167	4.03689e-166	NC_006072.1	1203218	1205017	+	1800	YALI0_F08635g	GO:0001056;GO:0003677;GO:0003697;GO:0003899;GO:0005634;GO:0005666;GO:0006351;GO:0006383	K03023	-	YALI0F08635p [Yarrowia lipolytica CLIB122]	YALI0_F08635g	YALI0F08635g	2908482
gene2506	1055.03	1730.16	379.901	0.219575	-2.18721	9.70257e-166	1.33895e-164	NC_006069.1	2088944	2091730	-	2787	YALI0_C15048g	GO:0000175;GO:0000178;GO:0000932;GO:0003723;GO:0004540;GO:0090501;GO:0090503	K19782	[EC:3.1.13.1]	YALI0C15048p [Yarrowia lipolytica CLIB122]	YALI0_C15048g	YALI0C15048g	2909347
gene4803	1645.58	2586.59	704.563	0.27239	-1.87625	1.08294e-165	1.49125e-164	NC_006071.1	1924751	1925626	+	876	YALI0_E16214g	GO:0005739	-	-	YALI0E16214p [Yarrowia lipolytica CLIB122]	YALI0_E16214g	YALI0E16214g	2911581
gene3436	1127.76	1943.15	312.369	0.160754	-2.63708	3.79273e-165	5.21156e-164	NC_006070.1	1449703	1450917	+	1215	YALI0_D11682g	GO:0016798	-	-	YALI0D11682p [Yarrowia lipolytica CLIB122]	YALI0_D11682g	YALI0D11682g	2910364
gene6379	722.798	1235.43	210.163	0.170112	-2.55544	1.03991e-164	1.41981e-163	NC_006072.1	2157890	2158828	-	939	YALI0_F16049g	GO:0001510;GO:0002128;GO:0002181;GO:0005737;GO:0008033;GO:0008168;GO:0008175;GO:0016740;GO:0030488;GO:0032259	K14864	[EC:2.1.1.205]	YALI0F16049p [Yarrowia lipolytica CLIB122]	YALI0_F16049g	YALI0F16049g	2908583
gene4297	2630.18	3989.81	1270.56	0.318451	-1.65086	1.56761e-164	2.13575e-163	NC_006071.1	520894	523971	-	3078	YALI0_E04576g	GO:0000049;GO:0003723;GO:0005634;GO:0005643;GO:0005737;GO:0006409;GO:0006810;GO:0008033;GO:0008536;GO:0016363;GO:0071528	K14288	-	YALI0E04576p [Yarrowia lipolytica CLIB122]	YALI0_E04576g	YALI0E04576g	2912203
gene3235	706.805	1211.12	202.494	0.167196	-2.58038	2.19781e-164	2.988e-163	NC_006070.1	943423	945084	-	1662	YALI0_D07392g	GO:0005215;GO:0005886;GO:0016020;GO:0016021;GO:0022857;GO:0031919;GO:0031924;GO:0055085	-	-	YALI0D07392p [Yarrowia lipolytica CLIB122]	YALI0_D07392g	YALI0D07392g	2910892
gene3568	1146.3	1860.74	431.863	0.232092	-2.10723	4.41842e-164	5.99429e-163	NC_006070.1	1812553	1813539	+	987	YALI0_D14894g	GO:0004585;GO:0005739;GO:0006520;GO:0016597;GO:0016740;GO:0016743;GO:0019240;GO:0042450	K00611	[EC:2.1.3.3]	YALI0D14894p [Yarrowia lipolytica CLIB122]	YALI0_D14894g	YALI0D14894g	2911331
gene3972	31246.6	44227.1	18266.2	0.413009	-1.27575	5.58989e-164	7.55165e-163	NC_006070.1	3242969	3244462	+	1494	YALI0_D24431g	GO:0003878;GO:0005829;GO:0006085;GO:0006633	K01648	[EC:2.3.3.8]	YALI0D24431p [Yarrowia lipolytica CLIB122]	YALI0_D24431g	YALI0D24431g	2910381
gene5716	357.108	667.374	46.8425	0.0701893	-3.8326	1.24922e-163	1.68408e-162	NC_006072.1	191100	192989	-	1890	YALI0_F01188g	-	-	-	YALI0F01188p [Yarrowia lipolytica CLIB122]	YALI0_F01188g	YALI0F01188g	2908214
gene6302	1234.13	2114.6	353.666	0.16725	-2.57992	1.80628e-163	2.42995e-162	NC_006072.1	1924230	1925636	+	1407	YALI0_F14377g	GO:0000462;GO:0005515;GO:0006396;GO:0030515;GO:0032040;GO:0034388	K14557	-	YALI0F14377p [Yarrowia lipolytica CLIB122]	YALI0_F14377g	YALI0F14377g	2908354
gene4313	866.649	1448.82	284.483	0.196355	-2.34846	2.29516e-163	3.08118e-162	NC_006071.1	548325	549746	-	1422	YALI0_E04939g	GO:0000166;GO:0003676;GO:0004812;GO:0004816;GO:0005524;GO:0006418;GO:0006421	K01893	[EC:6.1.1.22]	YALI0E04939p [Yarrowia lipolytica CLIB122]	YALI0_E04939g	YALI0E04939g	2912267
gene5544	3469.31	5173.08	1765.55	0.341295	-1.55091	4.57506e-163	6.12905e-162	NC_006071.1	3855021	3856310	+	1290	YALI0_E32483g	GO:0031314;GO:0045182;GO:0070131	K17656	-	YALI0E32483p [Yarrowia lipolytica CLIB122]	YALI0_E32483g	YALI0E32483g	2911550
gene2483	1931.98	2990.24	873.729	0.292194	-1.775	4.94837e-163	6.61535e-162	NC_006069.1	1995333	1996925	+	909	YALI0_C14498g	GO:0001409;GO:0016020;GO:0016021;GO:1903790	-	-	YALI0C14498p [Yarrowia lipolytica CLIB122]	YALI0_C14498g	YALI0C14498g	2910062
gene2653	804.155	1354.49	253.816	0.187388	-2.4159	1.10288e-162	1.46526e-161	NC_006069.1	2548567	2550975	+	2409	YALI0_C18557g	GO:0000166;GO:0003746;GO:0003924;GO:0005525;GO:0005739;GO:0006412;GO:0006414;GO:0032543;GO:0032790	K02355	-	YALI0C18557p [Yarrowia lipolytica CLIB122]	YALI0_C18557g	YALI0C18557g	2909984
gene8	3415.57	5088.37	1742.77	0.3425	-1.54582	2.08457e-161	2.75807e-160	NC_006067.1	29236	30342	+	1107	YALI0_A00286g	GO:0002181;GO:0005525;GO:0005737	K06944	-	YALI0A00286p [Yarrowia lipolytica CLIB122]	YALI0_A00286g	YALI0A00286g	2905939
gene2944	4890.05	7164.35	2615.74	0.365104	-1.45362	3.6232e-161	4.78396e-160	NC_006070.1	70280	71656	+	1377	YALI0_D00649g	GO:0005524;GO:0005737;GO:0005739;GO:0006515;GO:0016558;GO:0016887	K18798	[EC:3.6.4.7]	YALI0D00649p [Yarrowia lipolytica CLIB122]	YALI0_D00649g	YALI0D00649g	2910399
gene307	1650.87	2853.87	447.872	0.156935	-2.67176	5.21491e-161	6.87148e-160	NC_006067.1	751957	752378	+	357	YALI0_A07799g	GO:0005739;GO:0005759	K18170	-	YALI0A07799p [Yarrowia lipolytica CLIB122]	YALI0_A07799g	YALI0A07799g	2905747
gene5456	753.243	1276.44	230.041	0.18022	-2.47217	5.80408e-161	7.63213e-160	NC_006071.1	3614137	3615615	-	1479	YALI0_E30723g	GO:0000049;GO:0002940;GO:0003723;GO:0004809;GO:0008033;GO:0008168;GO:0016740;GO:0032259	K00555	-	YALI0E30723p [Yarrowia lipolytica CLIB122]	YALI0_E30723g	YALI0E30723g	2911947
gene2213	828.474	1387.51	269.442	0.194192	-2.36445	2.59012e-160	3.392e-159	NC_006069.1	1062153	1063847	+	939	YALI0_C08052g	GO:0005634;GO:0005730;GO:0030687	K14831	-	66S preribosome component MAK16 [Yarrowia lipolytica CLIB122]	YALI0_C08052g	YALI0C08052g	2909480
gene265	12320.7	17558.2	7083.25	0.403416	-1.30966	1.14838e-158	1.50085e-157	NC_006067.1	655752	656549	-	798	YALI0_A06765g	GO:0003729;GO:0005739;GO:0005759;GO:0008494;GO:0070131;GO:0097177	K15414	-	YALI0A06765p [Yarrowia lipolytica CLIB122]	YALI0_A06765g	YALI0A06765g	2905873
gene5973	638.446	1100.59	176.307	0.160193	-2.64211	6.9935e-158	9.08447e-157	NC_006072.1	1009876	1010976	-	1101	YALI0_F06820g	GO:0004479;GO:0005739;GO:0006413;GO:0009058;GO:0016742;GO:0071951	K00604	[EC:2.1.2.9]	YALI0F06820p [Yarrowia lipolytica CLIB122]	YALI0_F06820g	YALI0F06820g	2908506
gene1294	4415.79	6979.09	1852.49	0.265434	-1.91357	1.06169e-157	1.37634e-156	NC_006068.1	1460017	1461577	-	936	YALI0_B10736g	GO:0005371;GO:0005739;GO:0006843;GO:0015742;GO:0016020;GO:0016021	-	-	YALI0B10736p [Yarrowia lipolytica CLIB122]	YALI0_B10736g	YALI0B10736g	2907495
gene4172	2078	3179.26	976.735	0.307221	-1.70265	9.93686e-157	1.283e-155	NC_006071.1	196313	198130	+	1818	YALI0_E01782g	GO:0000166;GO:0000463;GO:0003676;GO:0003723;GO:0003724;GO:0004386;GO:0005524;GO:0005634;GO:0005730;GO:0006364;GO:0016787;GO:0042254	K13179	[EC:3.6.4.13]	YALI0E01782p [Yarrowia lipolytica CLIB122]	YALI0_E01782g	YALI0E01782g	2912058
gene3380	602.665	1050.46	154.875	0.147436	-2.76184	2.11434e-155	2.72444e-154	NC_006070.1	1312306	1314363	+	2058	YALI0_D10505g	GO:0003682;GO:0005634;GO:0005730;GO:0042254	K14834	-	YALI0D10505p [Yarrowia lipolytica CLIB122]	YALI0_D10505g	YALI0D10505g	2910427
gene836	1247.82	1987.04	508.602	0.255959	-1.96601	1.22962e-153	1.56868e-152	NC_006067.1	2265604	2267688	+	2085	YALI0_A21197g	GO:0000462;GO:0005515;GO:0005634;GO:0005730;GO:0032040	K14788	-	YALI0A21197p [Yarrowia lipolytica CLIB122]	YALI0_A21197g	YALI0A21197g	2906346
gene1059	7126.29	10230	4022.56	0.393212	-1.34662	7.89834e-153	1.00165e-151	NC_006068.1	705796	707367	+	1572	YALI0_B05126g	GO:0004497;GO:0005506;GO:0005783;GO:0005886;GO:0006696;GO:0008398;GO:0016020;GO:0016021;GO:0016125;GO:0016126;GO:0016491;GO:0016705;GO:0020037;GO:0046872;GO:0055114;GO:0070988	K05917	-	YALI0B05126p [Yarrowia lipolytica CLIB122]	YALI0_B05126g	YALI0B05126g	2906856
gene3426	1329.31	2102.02	556.604	0.264794	-1.91706	9.35631e-153	1.18421e-151	NC_006070.1	1431124	1432611	-	1488	YALI0_D11462g	GO:0000462;GO:0005634;GO:0005730	K14782	-	YALI0D11462p [Yarrowia lipolytica CLIB122]	YALI0_D11462g	YALI0D11462g	2910354
gene5577	958.911	1565.18	352.647	0.225308	-2.15003	2.41762e-151	3.04791e-150	NC_006071.1	3937712	3939217	-	1506	YALI0_E33187g	-	-	-	YALI0E33187p [Yarrowia lipolytica CLIB122]	YALI0_E33187g	YALI0E33187g	2912957
gene812	958.119	1563.54	352.698	0.225577	-2.14831	3.34461e-151	4.20007e-150	NC_006067.1	2212807	2214288	+	1482	YALI0_A20614g	GO:0005515;GO:0006364;GO:0032040;GO:0034511	K14793	-	YALI0A20614p [Yarrowia lipolytica CLIB122]	YALI0_A20614g	YALI0A20614g	2905832
gene3511	1142.73	1830.71	454.754	0.248403	-2.00924	3.68374e-151	4.6169e-150	NC_006070.1	1662360	1665272	-	2913	YALI0_D13464g	GO:0005730;GO:0006364;GO:0032040	K14567	-	YALI0D13464p [Yarrowia lipolytica CLIB122]	YALI0_D13464g	YALI0D13464g	2910826
gene4871	4044.11	5918.58	2169.63	0.366579	-1.4478	6.86524e-151	8.57086e-150	NC_006071.1	2099768	2100823	-	1056	YALI0_E17787g	GO:0004022;GO:0005737;GO:0008270;GO:0016491;GO:0046872;GO:0055114	K13953	[EC:1.1.1.1]	YALI0E17787p [Yarrowia lipolytica CLIB122]	YALI0_E17787g	YALI0E17787g	2912417
gene1485	39550.7	55263.1	23838.4	0.431361	-1.21303	1.36159e-150	1.68674e-149	NC_006068.1	2000641	2006977	-	6261	YALI0_B15059g	GO:0003824;GO:0004312;GO:0004313;GO:0004314;GO:0004318;GO:0004320;GO:0004321;GO:0005835;GO:0006629;GO:0006631;GO:0006633;GO:0008152;GO:0008659;GO:0016295;GO:0016296;GO:0016297;GO:0016418;GO:0016419;GO:0016491;GO:0016631;GO:0016740;GO:0016787;GO:0016829;GO:0019171;GO:0047451;GO:0055114	K00668	[EC:2.3.1.86]	YALI0B15059p [Yarrowia lipolytica CLIB122]	YALI0_B15059g	YALI0B15059g	2907339
gene5257	2376.7	3579.84	1173.55	0.327821	-1.60902	1.84482e-150	2.28097e-149	NC_006071.1	3136012	3138474	-	2463	YALI0_E26389g	GO:0000463;GO:0000466;GO:0005515;GO:0005634;GO:0005654;GO:0005730;GO:0006364;GO:0030687;GO:0042254;GO:0042273;GO:0043021;GO:0070545	K14824	-	YALI0E26389p [Yarrowia lipolytica CLIB122]	YALI0_E26389g	YALI0E26389g	2912374
gene7064	1244.8	1973.58	516.022	0.261465	-1.93531	2.1016e-149	2.58352e-148	NC_006072.1	3919953	3920636	-	684	YALI0_F31581g	-	-	-	YALI0F31581p [Yarrowia lipolytica CLIB122]	YALI0_F31581g	YALI0F31581g	2907905
gene2377	9260.12	13165.2	5355	0.406753	-1.29777	2.22967e-149	2.73572e-148	NC_006069.1	1626479	1627354	-	876	YALI0_C11803g	GO:0000287;GO:0004427;GO:0005737;GO:0006796	K01507	[EC:3.6.1.1]	YALI0C11803p [Yarrowia lipolytica CLIB122]	YALI0_C11803g	YALI0C11803g	2909269
gene2702	588.646	1084.05	93.2409	0.0860115	-3.53933	2.89648e-149	3.54032e-148	NC_006069.1	2669157	2670776	-	1620	YALI0_C19682g	-	-	-	YALI0C19682p [Yarrowia lipolytica CLIB122]	YALI0_C19682g	YALI0C19682g	2909921
gene4242	914.646	1495.66	333.63	0.223066	-2.16446	1.89221e-148	2.29533e-147	NC_006071.1	365387	365725	+	339	YALI0_E03344g	GO:0005739;GO:0005758;GO:0033617	K18179	-	YALI0E03344p [Yarrowia lipolytica CLIB122]	YALI0_E03344g	YALI0E03344g	2912141
gene1859	1531.09	2379.39	682.801	0.286965	-1.80105	4.16576e-148	5.04371e-147	NC_006068.1	3038241	3039557	-	1317	YALI0_B23298g	GO:0006696;GO:0016020;GO:0016021;GO:0016126;GO:0016628;GO:0030176;GO:0050613;GO:0055114	K00222	[EC:1.3.1.70]	YALI0B23298p [Yarrowia lipolytica CLIB122]	YALI0_B23298g	YALI0B23298g	2906662
gene3563	6790.41	9714.39	3866.43	0.398011	-1.32912	1.94426e-147	2.34959e-146	NC_006070.1	1797895	1799154	+	1260	YALI0_D14762g	GO:0003824;GO:0004659;GO:0004660;GO:0005965;GO:0008270;GO:0016740;GO:0018342;GO:0018343;GO:0046872	K05954	[EC:2.5.1.58]	YALI0D14762p [Yarrowia lipolytica CLIB122]	YALI0_D14762g	YALI0D14762g	2911326
gene212	2053.74	3115.27	992.204	0.318497	-1.65065	3.18119e-147	3.83716e-146	NC_006067.1	556292	558652	-	2361	YALI0_A05379g	GO:0006541;GO:0009058	K13950	[EC:2.6.1.85]	YALI0A05379p [Yarrowia lipolytica CLIB122]	YALI0_A05379g	YALI0A05379g	2905952
gene6571	538.195	937.133	139.257	0.148599	-2.7505	3.40425e-147	4.09851e-146	NC_006072.1	2700217	2701809	-	1593	YALI0_F20284g	GO:0005730;GO:0030692;GO:0032040;GO:0042254	K14771	-	YALI0F20284p [Yarrowia lipolytica CLIB122]	YALI0_F20284g	YALI0F20284g	2907795
gene882	5013.1	7242.48	2783.72	0.38436	-1.37947	5.31549e-147	6.37561e-146	NC_006068.1	154399	154872	+	474	YALI0_B00924g	GO:0005739;GO:0016491;GO:0055114	-	-	YALI0B00924p [Yarrowia lipolytica CLIB122]	YALI0_B00924g	YALI0B00924g	2907043
gene7048	2103.26	3181.69	1024.84	0.322105	-1.6344	1.63733e-146	1.95657e-145	NC_006072.1	3896134	3898536	+	2403	YALI0_F31251g	-	-	-	YALI0F31251p [Yarrowia lipolytica CLIB122]	YALI0_F31251g	YALI0F31251g	2907651
gene2987	1440.04	2244.21	635.863	0.283335	-1.81942	7.72229e-146	9.15969e-145	NC_006070.1	196682	198631	+	1950	YALI0_D01628g	GO:0001522;GO:0003723;GO:0005634;GO:0009451;GO:0009982	K06176	[EC:5.4.99.27]	YALI0D01628p [Yarrowia lipolytica CLIB122]	YALI0_D01628g	YALI0D01628g	2910468
gene1776	436.832	783.459	90.2045	0.115136	-3.11859	3.40664e-145	4.01109e-144	NC_006068.1	2821917	2823188	-	1272	YALI0_B21516g	GO:0002943;GO:0003824;GO:0008033;GO:0017150;GO:0050660;GO:0055114	K05542	[EC:1.3.1.88]	YALI0B21516p [Yarrowia lipolytica CLIB122]	YALI0_B21516g	YALI0B21516g	2907485
gene851	2230	3355.73	1104.26	0.329067	-1.60355	3.53169e-145	4.15071e-144	NC_006068.1	12092	15007	-	2916	YALI0_B00198g	GO:0005634;GO:0005635;GO:0005829;GO:0006606;GO:0006886;GO:0008536	-	-	YALI0B00198p [Yarrowia lipolytica CLIB122]	YALI0_B00198g	YALI0B00198g	2906883
gene1513	4477.52	6484.95	2470.1	0.380897	-1.39253	6.27985e-145	7.36706e-144	NC_006068.1	2075142	2076969	+	1776	YALI0_B15664g	GO:0005739;GO:0006744;GO:0016301;GO:0016310;GO:0031314	K08869	-	YALI0B15664p [Yarrowia lipolytica CLIB122]	YALI0_B15664g	YALI0B15664g	2906959
gene2053	1140.16	1814.01	466.315	0.257063	-1.9598	1.20612e-144	1.41235e-143	NC_006069.1	581151	581939	-	789	YALI0_C04345g	GO:0003723;GO:0005730	K14851	-	YALI0C04345p [Yarrowia lipolytica CLIB122]	YALI0_C04345g	YALI0C04345g	2909398
gene1264	1497.56	2321.18	673.93	0.290339	-1.78419	5.36146e-144	6.24401e-143	NC_006068.1	1381252	1383177	+	1926	YALI0_B10065g	GO:0005634;GO:0005730;GO:0005732;GO:0006364;GO:0032040;GO:0034457;GO:0042254	K14559	-	YALI0B10065p [Yarrowia lipolytica CLIB122]	YALI0_B10065g	YALI0B10065g	2907173
gene4806	2434.56	3636.93	1232.18	0.338797	-1.56151	7.14851e-144	8.29512e-143	NC_006071.1	1933768	1935717	-	1950	YALI0_E16280g	GO:0005515	K14546	-	YALI0E16280p [Yarrowia lipolytica CLIB122]	YALI0_E16280g	YALI0E16280g	2911584
gene4159	1389.95	2164.5	615.391	0.284311	-1.81446	3.81144e-142	4.37532e-141	NC_006071.1	170217	170993	+	777	YALI0_E01496g	GO:0005730;GO:0008168;GO:0019843;GO:0032040;GO:0070037;GO:0070475	K14568	[EC:2.1.1.260]	YALI0E01496p [Yarrowia lipolytica CLIB122]	YALI0_E01496g	YALI0E01496g	2912040
gene3484	1347.1	2103.13	591.078	0.281047	-1.83112	6.09307e-142	6.98201e-141	NC_006070.1	1595556	1595822	-	267	YALI0_D12793g	GO:0003735;GO:0005622;GO:0005762;GO:0005840;GO:0006412	K02914	-	YALI0D12793p [Yarrowia lipolytica CLIB122]	YALI0_D12793g	YALI0D12793g	2911261
gene3976	1077	1718.02	435.982	0.253771	-1.9784	9.06364e-142	1.03674e-140	NC_006070.1	3259659	3260531	+	873	YALI0_D24519g	-	-	-	YALI0D24519p [Yarrowia lipolytica CLIB122]	YALI0_D24519g	YALI0D24519g	2910447
gene2897	587.643	1004.13	171.151	0.170447	-2.55261	1.27678e-140	1.45268e-139	NC_006069.1	3216121	3217368	+	1248	YALI0_C24013g	GO:0005525;GO:0005739	-	-	YALI0C24013p [Yarrowia lipolytica CLIB122]	YALI0_C24013g	YALI0C24013g	2909575
gene6650	529.518	916.689	142.346	0.155283	-2.68703	1.91796e-140	2.17833e-139	NC_006072.1	2919336	2920655	-	1320	YALI0_F22055g	GO:0005737;GO:0016740;GO:0017183	K07561	[EC:2.5.1.108]	YALI0F22055p [Yarrowia lipolytica CLIB122]	YALI0_F22055g	YALI0F22055g	2908829
gene1727	10327.8	14519.6	6135.92	0.422595	-1.24265	5.14776e-140	5.79529e-139	NC_006068.1	2699568	2700473	-	906	YALI0_B20482g	GO:0016020;GO:0016021	K17081	-	YALI0B20482p [Yarrowia lipolytica CLIB122]	YALI0_B20482g	YALI0B20482g	2906616
gene6044	16030.4	22356.5	9704.4	0.434076	-1.20398	2.30608e-139	2.58708e-138	NC_006072.1	1182607	1184241	+	1635	YALI0_F08415g	GO:0003824;GO:0004351;GO:0005829;GO:0006536;GO:0006538;GO:0016829;GO:0016831;GO:0019752;GO:0030170	K01580	[EC:4.1.1.15]	YALI0F08415p [Yarrowia lipolytica CLIB122]	YALI0_F08415g	YALI0F08415g	2908500
gene5764	10111.1	14201.1	6021.03	0.423984	-1.23792	1.86935e-138	2.07896e-137	NC_006072.1	347264	348181	-	918	YALI0_F02255g	-	-	-	YALI0F02255p [Yarrowia lipolytica CLIB122]	YALI0_F02255g	YALI0F02255g	2908141
gene4438	861.546	1401.55	321.54	0.229417	-2.12396	5.0834e-138	5.62416e-137	NC_006071.1	922645	924468	+	1824	YALI0_E07920g	GO:0005215;GO:0005887;GO:0016020;GO:0016021;GO:0022857;GO:0042906;GO:0042907;GO:0055085	-	-	YALI0E07920p [Yarrowia lipolytica CLIB122]	YALI0_E07920g	YALI0E07920g	2912462
gene3947	747.821	1236.59	259.056	0.209493	-2.25503	5.42921e-138	5.99643e-137	NC_006070.1	3107591	3108442	-	852	YALI0_D23859g	GO:0005634;GO:0005730;GO:0006364;GO:0030515;GO:0032040;GO:0034457;GO:0042254	K14561	-	YALI0D23859p [Yarrowia lipolytica CLIB122]	YALI0_D23859g	YALI0D23859g	2910958
gene6881	4806.58	6892.96	2720.19	0.394633	-1.34142	7.021e-138	7.72791e-137	NC_006072.1	3468324	3469100	+	777	YALI0_F27313g	GO:0005743;GO:0006744;GO:0008289	K18587	-	YALI0F27313p [Yarrowia lipolytica CLIB122]	YALI0_F27313g	YALI0F27313g	2907842
gene6747	1471.54	2268.81	674.273	0.297193	-1.75053	9.52724e-138	1.04685e-136	NC_006072.1	3169741	3171630	+	1890	YALI0_F24299g	GO:0000293;GO:0005886;GO:0016020;GO:0016021;GO:0016491;GO:0033215;GO:0055114	-	-	YALI0F24299p [Yarrowia lipolytica CLIB122]	YALI0_F24299g	YALI0F24299g	2908722
gene4624	183.931	363.44	4.42209	0.0121673	-6.36085	2.08955e-137	2.28426e-136	NC_006071.1	1459027	1461249	-	2223	YALI0_E12045g	GO:0005515	-	-	YALI0E12045p [Yarrowia lipolytica CLIB122]	YALI0_E12045g	YALI0E12045g	2912809
gene4265	1347.83	2101.81	593.858	0.282547	-1.82344	8.1879e-137	8.92051e-136	NC_006071.1	433742	435088	+	1347	YALI0_E03872g	GO:0005887;GO:0016020;GO:0016021;GO:0055085	-	-	YALI0E03872p [Yarrowia lipolytica CLIB122]	YALI0_E03872g	YALI0E03872g	2912169
gene3831	4347.15	6251.16	2443.14	0.39083	-1.35539	1.12419e-136	1.2227e-135	NC_006070.1	2673338	2674594	+	1257	YALI0_D21142g	GO:0005739;GO:0005743;GO:0015031;GO:0016020;GO:0030150;GO:0051087	K17804	-	YALI0D21142p [Yarrowia lipolytica CLIB122]	YALI0_D21142g	YALI0D21142g	2910277
gene149	1274.76	1983.84	565.685	0.285147	-1.81022	1.14506e-134	1.23702e-133	NC_006067.1	408835	409827	-	993	YALI0_A03773g	GO:0003676;GO:0003723;GO:0005730	-	-	YALI0A03773p [Yarrowia lipolytica CLIB122]	YALI0_A03773g	YALI0A03773g	2906278
gene6984	17630.3	24427.6	10833	0.443472	-1.17308	7.73403e-134	8.28535e-133	NC_006072.1	3745354	3747045	-	1692	YALI0_F29909g	-	-	-	YALI0F29909p [Yarrowia lipolytica CLIB122]	YALI0_F29909g	YALI0F29909g	2908291
gene6681	935.762	1500.91	370.611	0.246924	-2.01786	8.75876e-134	9.3675e-133	NC_006072.1	2995723	2997705	+	1983	YALI0_F22759g	-	K14547	-	YALI0F22759p [Yarrowia lipolytica CLIB122]	YALI0_F22759g	YALI0F22759g	2908810
gene946	7301.96	10285.2	4318.75	0.419901	-1.25188	1.31467e-133	1.40136e-132	NC_006068.1	376076	376324	+	249	YALI0_B02409g	-	-	-	YALI0B02409p [Yarrowia lipolytica CLIB122]	YALI0_B02409g	YALI0B02409g	7009394
gene4207	448.033	789.938	106.128	0.13435	-2.89593	1.51277e-133	1.60986e-132	NC_006071.1	280937	282265	+	1329	YALI0_E02552g	GO:0000166;GO:0003676;GO:0003723;GO:0003724;GO:0004386;GO:0005524;GO:0005634;GO:0005730;GO:0006364;GO:0016787;GO:0042254	K14778	[EC:3.6.4.13]	YALI0E02552p [Yarrowia lipolytica CLIB122]	YALI0_E02552g	YALI0E02552g	2912109
gene5941	1165.73	1826.72	504.737	0.276308	-1.85565	2.32672e-133	2.46786e-132	NC_006072.1	925589	926455	-	867	YALI0_F06182g	GO:0001054;GO:0003899;GO:0005736;GO:0006351;GO:0006360	K03004	-	YALI0F06182p [Yarrowia lipolytica CLIB122]	YALI0_F06182g	YALI0F06182g	2908431
gene1642	2793.65	4090.17	1497.13	0.366031	-1.44996	7.89363e-133	8.34488e-132	NC_006068.1	2422752	2423318	-	567	YALI0_B18502g	GO:0016020;GO:0016021	-	-	YALI0B18502p [Yarrowia lipolytica CLIB122]	YALI0_B18502g	YALI0B18502g	2907393
gene2592	1476.53	2262.76	690.302	0.30507	-1.71279	8.04348e-133	8.48931e-132	NC_006069.1	2415592	2417472	+	1881	YALI0_C17083g	GO:0003723;GO:0005634;GO:0006364	-	-	YALI0C17083p [Yarrowia lipolytica CLIB122]	YALI0_C17083g	YALI0C17083g	2910084
gene251	671.8	1118.03	225.57	0.201757	-2.30931	9.26258e-133	9.75993e-132	NC_006067.1	625950	627494	+	1545	YALI0_A06479g	GO:0000027;GO:0005515;GO:0005634;GO:0005730	K14855	-	YALI0A06479p [Yarrowia lipolytica CLIB122]	YALI0_A06479g	YALI0A06479g	2905831
gene1049	980.217	1561.65	398.783	0.25536	-1.9694	2.25434e-132	2.37149e-131	NC_006068.1	671005	673602	+	2598	YALI0_B04862g	GO:0005515	K14552	-	YALI0B04862p [Yarrowia lipolytica CLIB122]	YALI0_B04862g	YALI0B04862g	2907549
gene4970	787.183	1284.09	290.275	0.226055	-2.14525	9.09657e-132	9.55363e-131	NC_006071.1	2379618	2380838	-	1221	YALI0_E20009g	GO:0005525;GO:0005737;GO:0016887	K06942	-	YALI0E20009p [Yarrowia lipolytica CLIB122]	YALI0_E20009g	YALI0E20009g	2911790
gene3033	5313.7	7543.24	3084.16	0.408864	-1.29031	9.9752e-132	1.04593e-130	NC_006070.1	341062	342366	+	1305	YALI0_D02739g	-	-	-	YALI0D02739p [Yarrowia lipolytica CLIB122]	YALI0_D02739g	YALI0D02739g	2910540
gene204	984.207	1565.8	402.614	0.25713	-1.95943	2.05375e-131	2.14991e-130	NC_006067.1	534888	535824	-	321	YALI0_A05137g	GO:0005739;GO:0005743;GO:0005751;GO:0016020;GO:0016021	K18176	-	YALI0A05137p [Yarrowia lipolytica CLIB122]	YALI0_A05137g	YALI0A05137g	2905827
gene2168	1164.5	1820.82	508.171	0.279088	-1.84121	2.65797e-131	2.77788e-130	NC_006069.1	934848	936713	+	1431	YALI0_C06974g	GO:0001401;GO:0016021;GO:0019867;GO:0034622;GO:0045040	K07277	-	YALI0C06974p [Yarrowia lipolytica CLIB122]	YALI0_C06974g	YALI0C06974g	2909231
gene2360	33501.5	50853.4	16149.6	0.317571	-1.65485	1.75926e-130	1.83266e-129	NC_006069.1	1578157	1585426	+	6801	YALI0_C11407g	GO:0000166;GO:0003989;GO:0005524;GO:0006633;GO:0016874;GO:0046872	K11262	-	YALI0C11407p [Yarrowia lipolytica CLIB122]	YALI0_C11407g	YALI0C11407g	2909424
gene3108	6054.45	8547.32	3561.57	0.416689	-1.26296	1.98618e-130	2.06235e-129	NC_006070.1	570329	571950	+	1395	YALI0_D04554g	GO:0001401;GO:0016021;GO:0019867;GO:0034622;GO:0045040	-	-	YALI0D04554p [Yarrowia lipolytica CLIB122]	YALI0_D04554g	YALI0D04554g	2910644
gene3642	1874.1	2808.22	939.977	0.334723	-1.57896	6.73825e-130	6.98535e-129	NC_006070.1	2073703	2074614	+	912	YALI0_D16775g	GO:0016872	-	-	YALI0D16775p [Yarrowia lipolytica CLIB122]	YALI0_D16775g	YALI0D16775g	2910209
gene2645	1142.94	1787.26	498.621	0.278987	-1.84173	8.8881e-130	9.19919e-129	NC_006069.1	2529375	2530487	+	1113	YALI0_C18425g	GO:0000166;GO:0004812;GO:0004830;GO:0005524;GO:0005739;GO:0005759;GO:0005829;GO:0006412;GO:0006418;GO:0006436;GO:0016874;GO:0070183	K01867	[EC:6.1.1.2]	YALI0C18425p [Yarrowia lipolytica CLIB122]	YALI0_C18425g	YALI0C18425g	2909978
gene609	895.873	1436.64	355.11	0.247181	-2.01636	1.28398e-129	1.32464e-128	NC_006067.1	1614979	1616370	-	1392	YALI0_A15774g	GO:0005887;GO:0016020;GO:0016021;GO:0055085	-	-	YALI0A15774p [Yarrowia lipolytica CLIB122]	YALI0_A15774g	YALI0A15774g	2906575
gene3612	1026.38	1619.93	432.832	0.267193	-1.90405	1.39789e-128	1.42611e-127	NC_006070.1	1970219	1971610	-	1392	YALI0_D15928g	GO:0008941;GO:0019825;GO:0020037;GO:0046210;GO:0051409;GO:0055114;GO:0071500;GO:0071949	-	-	YALI0D15928p [Yarrowia lipolytica CLIB122]	YALI0_D15928g	YALI0D15928g	2910184
gene4002	617.148	1032.37	201.922	0.195589	-2.3541	1.93174e-128	1.96139e-127	NC_006070.1	3360716	3362305	+	1590	YALI0_D25212g	GO:0005737;GO:0008033;GO:0008168;GO:0016300;GO:0016740;GO:0030488;GO:0032259	K15447	[EC:2.1.1.211]	YALI0D25212p [Yarrowia lipolytica CLIB122]	YALI0_D25212g	YALI0D25212g	2910783
gene4507	361.294	648.683	73.9048	0.113931	-3.13377	2.51812e-128	2.5487e-127	NC_006071.1	1137881	1139002	+	1122	YALI0_E09449g	GO:0000049;GO:0000166;GO:0003725;GO:0005524;GO:0005737;GO:0006450;GO:0008033;GO:0016740;GO:0016779;GO:0061710	K07566	[EC:2.7.7.87]	YALI0E09449p [Yarrowia lipolytica CLIB122]	YALI0_E09449g	YALI0E09449g	2912534
gene6799	14362.6	19841	8884.11	0.447765	-1.15919	4.32936e-128	4.36816e-127	NC_006072.1	3277302	3278603	+	1302	YALI0_F25509g	GO:0005739;GO:0005743;GO:0016020;GO:0016021;GO:0042407;GO:0061617;GO:0070584	-	-	YALI0F25509p [Yarrowia lipolytica CLIB122]	YALI0_F25509g	YALI0F25509g	2908496
gene7065	1171.17	1822.24	520.108	0.285423	-1.80883	9.12745e-128	9.18039e-127	NC_006072.1	3921149	3924259	-	3111	YALI0_F31603g	GO:0004252;GO:0005515;GO:0006508	K22686	[EC:3.4.21.-]	YALI0F31603p [Yarrowia lipolytica CLIB122]	YALI0_F31603g	YALI0F31603g	2907906
gene4215	1884.19	2814.46	953.909	0.338931	-1.56094	1.50833e-127	1.5147e-126	NC_006071.1	301246	303309	-	2064	YALI0_E02728g	GO:0004409;GO:0005739;GO:0008652;GO:0009085;GO:0016829;GO:0019878;GO:0046872;GO:0051536;GO:0051539	K01705	[EC:4.2.1.36]	YALI0E02728p [Yarrowia lipolytica CLIB122]	YALI0_E02728g	YALI0E02728g	2912118
gene4141	1001.62	1580.64	422.588	0.267352	-1.90319	1.69835e-126	1.68966e-125	NC_006071.1	128769	129545	-	777	YALI0_E01122g	GO:0003676;GO:0003723;GO:0005634;GO:0005730;GO:0005737;GO:0042254	K11884	-	YALI0E01122p [Yarrowia lipolytica CLIB122]	YALI0_E01122g	YALI0E01122g	2912939
gene3936	522.44	890.407	154.472	0.173485	-2.52712	1.89498e-126	1.88237e-125	NC_006070.1	3073174	3074948	+	1629	YALI0_D23639g	GO:0000049;GO:0000166;GO:0003676;GO:0004812;GO:0004824;GO:0005524;GO:0005737;GO:0005739;GO:0006418;GO:0006430;GO:0070154	K04567	[EC:6.1.1.6]	YALI0D23639p [Yarrowia lipolytica CLIB122]	YALI0_D23639g	YALI0D23639g	2910878
gene4866	4005.07	5984.74	2025.41	0.338429	-1.56307	1.96748e-126	1.95136e-125	NC_006071.1	2084405	2085406	+	1002	YALI0_E17677g	GO:0005623;GO:0006882;GO:0016020;GO:0016021;GO:0038023	K07297	-	YALI0E17677p [Yarrowia lipolytica CLIB122]	YALI0_E17677g	YALI0E17677g	2911681
gene6656	3970.79	5669.89	2271.69	0.400659	-1.31955	2.25972e-126	2.23775e-125	NC_006072.1	2940813	2941547	+	735	YALI0_F22187g	-	-	-	YALI0F22187p [Yarrowia lipolytica CLIB122]	YALI0_F22187g	YALI0F22187g	2908822
gene4371	1774.44	2658.42	890.464	0.33496	-1.57794	2.31269e-126	2.28668e-125	NC_006071.1	717233	718033	+	801	YALI0_E06215g	GO:0004408;GO:0005739;GO:0005743;GO:0016020;GO:0016829;GO:0018063;GO:0046872	K01764	[EC:4.4.1.17]	YALI0E06215p [Yarrowia lipolytica CLIB122]	YALI0_E06215g	YALI0E06215g	2912385
gene6703	1991.58	2957.38	1025.78	0.346854	-1.5276	4.67866e-126	4.60475e-125	NC_006072.1	3056852	3057706	+	855	YALI0_F23309g	GO:0005634;GO:0005681;GO:0005737;GO:0006397;GO:0008380	-	-	YALI0F23309p [Yarrowia lipolytica CLIB122]	YALI0_F23309g	YALI0F23309g	2908777
gene4100	1159.47	1801.89	517.05	0.286948	-1.80114	5.65337e-126	5.55554e-125	NC_006071.1	17780	18472	-	318	YALI0_E00220g	GO:0003735;GO:0005763;GO:0005840;GO:0006412;GO:0019843;GO:0070181	K02990	-	YALI0E00220p [Yarrowia lipolytica CLIB122]	YALI0_E00220g	YALI0E00220g	2912863
gene6680	673.486	1109.64	237.331	0.213881	-2.22512	3.16549e-125	3.09649e-124	NC_006072.1	2993834	2995003	-	1170	YALI0_F22737g	GO:0005634;GO:0008033;GO:0008168;GO:0016429;GO:0016740;GO:0030488;GO:0031515;GO:0032259	K07442	-	YALI0F22737p [Yarrowia lipolytica CLIB122]	YALI0_F22737g	YALI0F22737g	2908809
gene6731	1875.81	2793.58	958.042	0.342944	-1.54396	6.44394e-125	6.29388e-124	NC_006072.1	3136727	3138349	-	1623	YALI0_F23903g	GO:0005215;GO:0005366;GO:0005887;GO:0015798;GO:0016020;GO:0016021;GO:0022857;GO:0055085	K08150	-	YALI0F23903p [Yarrowia lipolytica CLIB122]	YALI0_F23903g	YALI0F23903g	2908738
gene4552	740.433	1205.61	275.253	0.22831	-2.13094	1.21403e-124	1.18037e-123	NC_006071.1	1295208	1296290	-	1083	YALI0_E10439g	GO:0000462;GO:0005730;GO:0032040	K14765	-	YALI0E10439p [Yarrowia lipolytica CLIB122]	YALI0_E10439g	YALI0E10439g	2912601
gene6042	1513.95	2291.83	736.06	0.321167	-1.63861	1.66436e-124	1.61576e-123	NC_006072.1	1175498	1177996	-	2499	YALI0_F08371g	GO:0005634;GO:0005730;GO:0006364;GO:0030515;GO:0030692;GO:0032040;GO:0042254;GO:0042274	K14766	-	YALI0F08371p [Yarrowia lipolytica CLIB122]	YALI0_F08371g	YALI0F08371g	2908498
gene6031	1256.15	1932.47	579.839	0.300051	-1.73672	5.26352e-124	5.09442e-123	NC_006072.1	1149190	1150707	+	1518	YALI0_F08151g	GO:0000055;GO:0005634;GO:0005737;GO:0015031;GO:0043023	K07562	-	60S ribosomal export protein NMD3 [Yarrowia lipolytica CLIB122]	YALI0_F08151g	YALI0F08151g	2908524
gene5499	1553.21	2344.65	761.768	0.324896	-1.62195	8.28085e-124	7.99071e-123	NC_006071.1	3741085	3744558	-	3474	YALI0_E31625g	GO:0003723;GO:0005634;GO:0005730;GO:0006364;GO:0006409;GO:0032040;GO:0032545;GO:0034456;GO:0042254	K14544	-	YALI0E31625p [Yarrowia lipolytica CLIB122]	YALI0_E31625g	YALI0E31625g	2912971
gene5889	844.675	1351.82	337.526	0.249682	-2.00184	3.85634e-123	3.71564e-122	NC_006072.1	769917	771884	+	1968	YALI0_F05104g	GO:0003676	K09191	-	YALI0F05104p [Yarrowia lipolytica CLIB122]	YALI0_F05104g	YALI0F05104g	2908630
gene6598	1053.78	1647.03	460.519	0.279605	-1.83854	6.26821e-123	6.02143e-122	NC_006072.1	2780278	2781870	-	1593	YALI0_F20878g	GO:0005739;GO:0008168;GO:0016740;GO:0019918;GO:0032259;GO:0035243	-	-	YALI0F20878p [Yarrowia lipolytica CLIB122]	YALI0_F20878g	YALI0F20878g	2908954
gene5020	4836.69	6825.19	2848.19	0.417306	-1.26082	7.37314e-123	7.07227e-122	NC_006071.1	2514049	2515656	+	1608	YALI0_E21131g	GO:0006629;GO:0016020;GO:0016021;GO:0016491;GO:0055114	K13076	[EC:1.14.19.18]	YALI0E21131p [Yarrowia lipolytica CLIB122]	YALI0_E21131g	YALI0E21131g	2911883
gene4291	1172.32	1836.73	507.917	0.276533	-1.85447	9.34988e-123	8.95496e-122	NC_006071.1	503189	505405	-	2217	YALI0_E04444g	GO:0000166;GO:0000175;GO:0000176;GO:0000467;GO:0003676;GO:0003727;GO:0003824;GO:0005622;GO:0005730;GO:0006139;GO:0006396;GO:0008408;GO:0044237;GO:0071035;GO:0071036;GO:0071037;GO:0071038;GO:0071039;GO:0071040;GO:0071044;GO:0071048;GO:0071051	K12591	[EC:3.1.13.-]	YALI0E04444p [Yarrowia lipolytica CLIB122]	YALI0_E04444g	YALI0E04444g	2912197
gene1784	4821.91	6803.11	2840.72	0.417562	-1.25994	1.11862e-122	1.06977e-121	NC_006068.1	2850721	2854368	+	3648	YALI0_B21662g	GO:0003676;GO:0003723	-	-	YALI0B21662p [Yarrowia lipolytica CLIB122]	YALI0_B21662g	YALI0B21662g	2907249
gene3926	11812.2	16270.3	7354	0.451989	-1.14564	2.60835e-122	2.48704e-121	NC_006070.1	3041785	3042591	+	807	YALI0_D23397g	GO:0005739;GO:0005743;GO:0006099;GO:0008177;GO:0009055;GO:0009060;GO:0016491;GO:0022904;GO:0031966;GO:0046872;GO:0051536;GO:0051537;GO:0051538;GO:0051539;GO:0055114	K00235	[EC:1.3.5.1]	YALI0D23397p [Yarrowia lipolytica CLIB122]	YALI0_D23397g	YALI0D23397g	2910329
gene5421	16430.6	22518.2	10343.1	0.459324	-1.12242	4.08334e-122	3.88766e-121	NC_006071.1	3545533	3546897	-	1365	YALI0_E29975g	GO:0004109;GO:0005737;GO:0005739;GO:0005758;GO:0006779;GO:0006782;GO:0055114	K00228	[EC:1.3.3.3]	YALI0E29975p [Yarrowia lipolytica CLIB122]	YALI0_E29975g	YALI0E29975g	2911456
gene5180	9783.07	13515	6051.16	0.447737	-1.15928	8.05975e-122	7.65081e-121	NC_006071.1	2931911	2935198	-	3288	YALI0_E24607g	GO:0000166;GO:0002161;GO:0004812;GO:0004823;GO:0005524;GO:0006418;GO:0006429;GO:0106074	K01869	[EC:6.1.1.4]	YALI0E24607p [Yarrowia lipolytica CLIB122]	YALI0_E24607g	YALI0E24607g	2912657
gene3181	5491.91	7703.13	3280.69	0.42589	-1.23145	2.01766e-121	1.90963e-120	NC_006070.1	796423	797844	-	1422	YALI0_D06215g	GO:0003860;GO:0005739;GO:0006574;GO:0009083;GO:0016787	K05605	[EC:3.1.2.4]	YALI0D06215p [Yarrowia lipolytica CLIB122]	YALI0_D06215g	YALI0D06215g	2910864
gene6371	6559.93	9143.85	3976	0.434828	-1.20148	4.43418e-121	4.18443e-120	NC_006072.1	2139535	2141019	-	1485	YALI0_F15873g	GO:0005739;GO:0016020;GO:0016021;GO:0043022	K17800	-	YALI0F15873p [Yarrowia lipolytica CLIB122]	YALI0_F15873g	YALI0F15873g	2908258
gene493	225.792	427.955	23.6287	0.0552132	-4.17884	2.05019e-120	1.9234e-119	NC_006067.1	1309944	1310774	+	831	YALI0_A12683g	GO:0003676;GO:0004523;GO:0043137;GO:0090502	-	-	YALI0A12683p [Yarrowia lipolytica CLIB122]	YALI0_A12683g	YALI0A12683g	2906225
gene6166	17809.3	24327.9	11290.8	0.464109	-1.10747	4.16036e-120	3.89737e-119	NC_006072.1	1495621	1496550	+	930	YALI0_F11297g	GO:0000254;GO:0005506;GO:0005789;GO:0006696;GO:0008610;GO:0016020;GO:0016021;GO:0016126;GO:0016491;GO:0055114	K07750	[EC:1.14.18.9]	YALI0F11297p [Yarrowia lipolytica CLIB122]	YALI0_F11297g	YALI0F11297g	2907968
gene6052	21030.7	28651.5	13409.8	0.468032	-1.09532	3.56968e-119	3.33916e-118	NC_006072.1	1199863	1201116	-	1254	YALI0_F08613g	GO:0003824;GO:0004222;GO:0005739;GO:0005743;GO:0005759;GO:0006508;GO:0016020;GO:0046872;GO:0055114;GO:0070469	K00415	-	YALI0F08613p [Yarrowia lipolytica CLIB122]	YALI0_F08613g	YALI0F08613g	2908481
gene1002	581.007	966.125	195.888	0.202757	-2.30218	2.23223e-118	2.07597e-117	NC_006068.1	520600	521442	+	843	YALI0_B03784g	GO:0000462;GO:0000469;GO:0005634;GO:0005730;GO:0006364;GO:0030686;GO:0042254	K14795	-	YALI0B03784p [Yarrowia lipolytica CLIB122]	YALI0_B03784g	YALI0B03784g	2907010
gene3623	1136.03	1751.53	520.541	0.297193	-1.75053	2.25429e-118	2.09345e-117	NC_006070.1	2014547	2018188	-	3642	YALI0_D16313g	GO:0003723;GO:0005515;GO:0005730;GO:0042274	K17583	-	YALI0D16313p [Yarrowia lipolytica CLIB122]	YALI0_D16313g	YALI0D16313g	2911291
gene4767	1145.58	1782.84	508.307	0.28511	-1.81041	4.34977e-118	4.03359e-117	NC_006071.1	1820539	1820793	+	255	YALI0_E15312g	-	-	-	YALI0E15312p [Yarrowia lipolytica CLIB122]	YALI0_E15312g	YALI0E15312g	2911996
gene2634	1246.36	1903.78	588.941	0.309354	-1.69267	6.22342e-118	5.76273e-117	NC_006069.1	2500250	2501173	+	924	YALI0_C18161g	GO:0003743;GO:0005085;GO:0005851;GO:0006413;GO:0006446;GO:0044237	K03239	-	YALI0C18161p [Yarrowia lipolytica CLIB122]	YALI0_C18161g	YALI0C18161g	2909990
gene6883	1129.39	1877.14	381.641	0.20331	-2.29825	8.6009e-118	7.94129e-117	NC_006072.1	3472867	3473652	-	786	YALI0_F27357g	GO:0005739;GO:0006464;GO:0009249;GO:0016415;GO:0016740;GO:0016746;GO:0033819;GO:0102555	K23735	[EC:2.3.1.181]	YALI0F27357p [Yarrowia lipolytica CLIB122]	YALI0_F27357g	YALI0F27357g	2907883
gene3629	3400.4	4840.43	1960.36	0.404996	-1.30402	1.86429e-117	1.71638e-116	NC_006070.1	2037618	2038466	+	849	YALI0_D16445g	GO:0003824	-	-	YALI0D16445p [Yarrowia lipolytica CLIB122]	YALI0_D16445g	YALI0D16445g	2911296
gene6664	777.873	1346.32	209.424	0.155552	-2.68453	2.19075e-117	2.01117e-116	NC_006072.1	2965312	2965923	+	477	YALI0_F22367g	GO:0016020;GO:0016021	-	-	YALI0F22367p [Yarrowia lipolytica CLIB122]	YALI0_F22367g	YALI0F22367g	2908818
gene154	1668.18	2483.05	853.311	0.343654	-1.54097	2.58336e-117	2.36483e-116	NC_006067.1	424988	425953	+	966	YALI0_A03905g	GO:0000027;GO:0000463;GO:0000470;GO:0005730;GO:0019843	K14847	-	YALI0A03905p [Yarrowia lipolytica CLIB122]	YALI0_A03905g	YALI0A03905g	2906197
gene3601	578.83	961.085	196.575	0.204534	-2.28959	5.8358e-117	5.32693e-116	NC_006070.1	1918313	1919353	+	1041	YALI0_D15664g	GO:0003677	K21631	-	YALI0D15664p [Yarrowia lipolytica CLIB122]	YALI0_D15664g	YALI0D15664g	2910173
gene5892	423.091	732.004	114.178	0.15598	-2.68056	7.89875e-117	7.18954e-116	NC_006072.1	780708	781880	-	1173	YALI0_F05170g	GO:0000462;GO:0005730	-	-	YALI0F05170p [Yarrowia lipolytica CLIB122]	YALI0_F05170g	YALI0F05170g	2908272
gene6157	2613	3769.94	1456.06	0.38623	-1.37247	8.6791e-117	7.88864e-116	NC_006072.1	1474372	1475289	+	918	YALI0_F11099g	GO:0016020;GO:0016021	-	-	YALI0F11099p [Yarrowia lipolytica CLIB122]	YALI0_F11099g	YALI0F11099g	2908178
gene3951	8936.85	12322.8	5550.95	0.450463	-1.15052	1.87486e-116	1.70169e-115	NC_006070.1	3129612	3131738	-	2127	YALI0_D23947g	-	-	-	YALI0D23947p [Yarrowia lipolytica CLIB122]	YALI0_D23947g	YALI0D23947g	2910986
gene1363	968.179	1512.26	424.102	0.280443	-1.83422	7.03752e-116	6.37849e-115	NC_006068.1	1640465	1642000	-	1536	YALI0_B12320g	GO:0000463;GO:0000466;GO:0005515;GO:0005634;GO:0005654;GO:0005730;GO:0006364;GO:0030687;GO:0042254;GO:0042273;GO:0043021;GO:0070545	K14863	-	YALI0B12320p [Yarrowia lipolytica CLIB122]	YALI0_B12320g	YALI0B12320g	2907122
gene6784	692.913	1123.52	262.307	0.233469	-2.0987	8.75944e-116	7.92797e-115	NC_006072.1	3250672	3251808	+	1137	YALI0_F25157g	-	-	-	YALI0F25157p [Yarrowia lipolytica CLIB122]	YALI0_F25157g	YALI0F25157g	2908417
gene3605	1451.44	2181.26	721.621	0.330828	-1.59585	1.02342e-115	9.24973e-115	NC_006070.1	1931707	1933146	+	1440	YALI0_D15774g	GO:0005515;GO:0005739;GO:0005759;GO:0016226;GO:0016740	K22073	[EC:2.1.-.-]	YALI0D15774p [Yarrowia lipolytica CLIB122]	YALI0_D15774g	YALI0D15774g	2910177
gene5797	503.233	848.632	157.833	0.185986	-2.42674	3.27274e-115	2.95375e-114	NC_006072.1	423845	424603	+	759	YALI0_F03025g	GO:0003697;GO:0003723;GO:0004521;GO:0005634;GO:0005737;GO:0016070;GO:0043565;GO:0090502	-	-	YALI0F03025p [Yarrowia lipolytica CLIB122]	YALI0_F03025g	YALI0F03025g	2907755
gene1919	3015.9	4307.36	1724.45	0.400349	-1.32067	3.66025e-115	3.29423e-114	NC_006069.1	170542	171228	-	687	YALI0_C01221g	GO:0005515	K06694	-	YALI0C01221p [Yarrowia lipolytica CLIB122]	YALI0_C01221g	YALI0C01221g	2909160
gene2680	1321.55	1999.64	643.454	0.321785	-1.63583	6.74003e-115	6.05753e-114	NC_006069.1	2623989	2625383	+	840	YALI0_C19195g	GO:0000095;GO:0005743;GO:0016020;GO:0016021;GO:0022857;GO:0055085;GO:1901962	K15111	-	YALI0C19195p [Yarrowia lipolytica CLIB122]	YALI0_C19195g	YALI0C19195g	2909950
gene6841	931.869	1458.9	404.836	0.277494	-1.84947	8.08683e-115	7.25779e-114	NC_006072.1	3382737	3384686	+	1950	YALI0_F26433g	GO:0000166;GO:0004812;GO:0005524;GO:0005737;GO:0006418;GO:0016874	K01876	[EC:6.1.1.12]	YALI0F26433p [Yarrowia lipolytica CLIB122]	YALI0_F26433g	YALI0F26433g	2908694
gene509	1245.6	1894.39	596.817	0.315045	-1.66637	9.65518e-115	8.65325e-114	NC_006067.1	1339997	1342444	+	2448	YALI0_A13057g	GO:0005739;GO:0008033;GO:0016020;GO:0016021;GO:0072684	K00784	[EC:3.1.26.11]	YALI0A13057p [Yarrowia lipolytica CLIB122]	YALI0_A13057g	YALI0A13057g	2906246
gene2651	5201.81	7251.38	3152.23	0.434707	-1.20189	1.4057e-114	1.25807e-113	NC_006069.1	2545433	2546179	+	747	YALI0_C18513g	GO:0000774;GO:0001405;GO:0005739;GO:0005759;GO:0006457;GO:0030150;GO:0042803;GO:0050790;GO:0051082;GO:0051087	K03687	-	YALI0C18513p [Yarrowia lipolytica CLIB122]	YALI0_C18513g	YALI0C18513g	2909982
gene6567	1271.53	1928.75	614.303	0.318499	-1.65064	4.09563e-114	3.6553e-113	NC_006072.1	2690375	2692075	-	1701	YALI0_F20196g	GO:0001510;GO:0006396;GO:0008033;GO:0008168;GO:0008173;GO:0016740;GO:0030488;GO:0030696;GO:0030697;GO:0032259	K15331	[EC:2.1.1.35]	YALI0F20196p [Yarrowia lipolytica CLIB122]	YALI0_F20196g	YALI0F20196g	2908259
gene2661	1905.21	2796.17	1014.26	0.362734	-1.46302	4.60033e-114	4.10005e-113	NC_006069.1	2569945	2571303	-	1359	YALI0_C18755g	GO:0005739;GO:0006744;GO:0008299;GO:0016740;GO:0046872	K05355	-	YALI0C18755p [Yarrowia lipolytica CLIB122]	YALI0_C18755g	YALI0C18755g	2909963
gene6612	1460.99	2188.96	733.024	0.334874	-1.57831	5.57713e-114	4.95685e-113	NC_006072.1	2815214	2815669	+	456	YALI0_F21219g	GO:0005739;GO:0005759;GO:0009055;GO:0015035;GO:0015036;GO:0022900;GO:0045454;GO:0046872;GO:0051536;GO:0051537;GO:0055114	K07390	-	YALI0F21219p [Yarrowia lipolytica CLIB122]	YALI0_F21219g	YALI0F21219g	2908086
gene1427	604.92	994.352	215.488	0.216713	-2.20615	7.65274e-114	6.7922e-113	NC_006068.1	1853647	1855206	+	1560	YALI0_B13816g	GO:0004497;GO:0005506;GO:0016491;GO:0016705;GO:0016712;GO:0020037;GO:0046872;GO:0055114	-	-	YALI0B13816p [Yarrowia lipolytica CLIB122]	YALI0_B13816g	YALI0B13816g	2907635
gene4125	557.478	925.698	189.258	0.204449	-2.29019	8.37461e-114	7.41239e-113	NC_006071.1	77644	78597	-	954	YALI0_E00770g	GO:0000154;GO:0000179;GO:0003723;GO:0005759;GO:0006364;GO:0008168;GO:0008649;GO:0016740;GO:0031167;GO:0032259;GO:0052909	K14191	[EC:2.1.1.183]	YALI0E00770p [Yarrowia lipolytica CLIB122]	YALI0_E00770g	YALI0E00770g	2912893
gene3151	1578.05	2348.04	808.062	0.344143	-1.53892	1.34391e-113	1.18786e-112	NC_006070.1	712187	713188	+	1002	YALI0_D05511g	GO:0000176;GO:0000177;GO:0000178;GO:0000467;GO:0003723;GO:0034427;GO:0034475;GO:0043928;GO:0071034;GO:0071035;GO:0071038;GO:0071049;GO:0071051	K03679	-	YALI0D05511p [Yarrowia lipolytica CLIB122]	YALI0_D05511g	YALI0D05511g	2911027
gene2803	6296.66	8707.09	3886.22	0.446328	-1.16382	1.02229e-112	9.02345e-112	NC_006069.1	2934629	2935348	+	720	YALI0_C21934g	GO:0030170	K06997	-	YALI0C21934p [Yarrowia lipolytica CLIB122]	YALI0_C21934g	YALI0C21934g	2909811
gene4759	1637.64	2460.85	814.436	0.330957	-1.59528	1.32549e-111	1.16356e-110	NC_006071.1	1806339	1806864	+	450	YALI0_E15136g	GO:0005744;GO:0008320;GO:0016020;GO:0016021;GO:0030150;GO:0031305	K17795	-	YALI0E15136p [Yarrowia lipolytica CLIB122]	YALI0_E15136g	YALI0E15136g	7009559
gene6581	19503.4	26368.3	12638.4	0.479304	-1.06099	2.20246e-111	1.93076e-110	NC_006072.1	2727200	2728222	+	1023	YALI0_F20504g	GO:0000302;GO:0004130;GO:0004601;GO:0005739;GO:0005759;GO:0006979;GO:0016491;GO:0020037;GO:0034599;GO:0042744;GO:0046872;GO:0055114;GO:0098869	K00428	[EC:1.11.1.5]	YALI0F20504p [Yarrowia lipolytica CLIB122]	YALI0_F20504g	YALI0F20504g	2908688
gene1288	975.837	1511.27	440.408	0.291416	-1.77885	1.3167e-110	1.14956e-109	NC_006068.1	1446416	1447879	+	1464	YALI0_B10582g	GO:0003723;GO:0005634;GO:0008033;GO:0016429;GO:0030488;GO:0031515	K03256	-	YALI0B10582p [Yarrowia lipolytica CLIB122]	YALI0_B10582g	YALI0B10582g	2907608
gene5377	510.481	852.856	168.107	0.197111	-2.34292	3.98807e-110	3.46767e-109	NC_006071.1	3434854	3436944	+	2091	YALI0_E29007g	GO:0000171;GO:0000172;GO:0001682;GO:0004526;GO:0005655;GO:0008033;GO:0090501;GO:0090502	K01164	[EC:3.1.26.5]	YALI0E29007p [Yarrowia lipolytica CLIB122]	YALI0_E29007g	YALI0E29007g	2911873
gene3042	824.676	1298.67	350.685	0.270035	-1.88878	1.55421e-109	1.34957e-108	NC_006070.1	374275	375510	-	1236	YALI0_D02937g	GO:0006457;GO:0031072;GO:0046872;GO:0051082	-	-	YALI0D02937p [Yarrowia lipolytica CLIB122]	YALI0_D02937g	YALI0D02937g	2910549
gene3739	48178.7	64554.2	31803.3	0.492661	-1.02133	4.36935e-109	3.77364e-108	NC_006070.1	2400420	2401190	+	771	YALI0_D18964g	GO:0016491;GO:0050664;GO:0055114	-	-	YALI0D18964p [Yarrowia lipolytica CLIB122]	YALI0_D18964g	YALI0D18964g	2911146
gene6209	3058.72	4330.92	1786.52	0.412504	-1.27752	1.04877e-108	9.03348e-108	NC_006072.1	1609086	1611512	-	2427	YALI0_F12221g	GO:0004596;GO:0005515;GO:0005737;GO:0017196;GO:0031415	K20792	-	YALI0F12221p [Yarrowia lipolytica CLIB122]	YALI0_F12221g	YALI0F12221g	2907961
gene3362	12031.2	16319.4	7743.07	0.47447	-1.07561	1.53098e-108	1.31517e-107	NC_006070.1	1283067	1284782	+	1716	YALI0_D10131g	GO:0000287;GO:0003824;GO:0005829;GO:0016831;GO:0030976;GO:0046872	K01568	[EC:4.1.1.1]	YALI0D10131p [Yarrowia lipolytica CLIB122]	YALI0_D10131g	YALI0D10131g	2910997
gene965	6042.4	8322.83	3761.96	0.452005	-1.14559	2.35129e-108	2.01714e-107	NC_006068.1	426900	427505	-	516	YALI0_B02852g	GO:0000334;GO:0005506;GO:0005737;GO:0006569;GO:0008198;GO:0009435;GO:0016491;GO:0019363;GO:0019805;GO:0034354;GO:0043420;GO:0046872;GO:0046874;GO:0051213;GO:0055114	K00452	[EC:1.13.11.6]	YALI0B02852p [Yarrowia lipolytica CLIB122]	YALI0_B02852g	YALI0B02852g	2907509
gene2966	3415.1	4805.94	2024.26	0.421199	-1.24743	4.89252e-108	4.19163e-107	NC_006070.1	126913	129747	-	2835	YALI0_D01133g	GO:0005634;GO:0005737;GO:0006606;GO:0006886;GO:0008536	K15436	-	YALI0D01133p [Yarrowia lipolytica CLIB122]	YALI0_D01133g	YALI0D01133g	2910418
gene2692	2086.73	3018.82	1154.63	0.382476	-1.38656	6.56718e-108	5.61888e-107	NC_006069.1	2652452	2653321	-	870	YALI0_C19448g	GO:0043461	K07556	-	YALI0C19448p [Yarrowia lipolytica CLIB122]	YALI0_C19448g	YALI0C19448g	2909940
gene2299	8233.35	11233.4	5233.27	0.465866	-1.10201	2.4809e-107	2.1142e-106	NC_006069.1	1368317	1368847	+	531	YALI0_C09988g	GO:0000413;GO:0003755;GO:0005634;GO:0005739;GO:0006457;GO:0016018;GO:0016853;GO:0042026;GO:0051082	-	-	YALI0C09988p [Yarrowia lipolytica CLIB122]	YALI0_C09988g	YALI0C09988g	2909452
gene1707	2960.21	4188.74	1731.67	0.413411	-1.27435	7.52347e-107	6.39445e-106	NC_006068.1	2636757	2637845	+	1089	YALI0_B20020g	GO:0003824;GO:0003849;GO:0005737;GO:0008652;GO:0009058;GO:0009073;GO:0016740	K01626	[EC:2.5.1.54]	YALI0B20020p [Yarrowia lipolytica CLIB122]	YALI0_B20020g	YALI0B20020g	2907006
gene1568	1484.27	2198.38	770.161	0.350331	-1.51321	1.33532e-106	1.13193e-105	NC_006068.1	2221677	2223938	-	2262	YALI0_B16896g	GO:0000166;GO:0003676;GO:0003723;GO:0003724;GO:0004386;GO:0005524;GO:0005634;GO:0005730;GO:0016787;GO:0042254	K13181	[EC:3.6.4.13]	YALI0B16896p [Yarrowia lipolytica CLIB122]	YALI0_B16896g	YALI0B16896g	2907091
gene7059	1246.19	1870.9	621.476	0.33218	-1.58996	1.68859e-105	1.42387e-104	NC_006072.1	3913495	3915129	+	1635	YALI0_F31493g	GO:0000166;GO:0003676;GO:0003723;GO:0003724;GO:0004386;GO:0005524;GO:0005634;GO:0005730;GO:0006364;GO:0016787;GO:0042254	K14810	[EC:3.6.4.13]	YALI0F31493p [Yarrowia lipolytica CLIB122]	YALI0_F31493g	YALI0F31493g	2907892
gene4593	370.911	642.372	99.4498	0.154817	-2.69137	1.84196e-105	1.54913e-104	NC_006071.1	1388910	1390034	+	1125	YALI0_E11363g	GO:0000463;GO:0000492;GO:0005634;GO:0046872;GO:0048254;GO:0070761	-	-	YALI0E11363p [Yarrowia lipolytica CLIB122]	YALI0_E11363g	YALI0E11363g	2912749
gene6916	1227.55	1845.5	609.596	0.330315	-1.59808	2.11323e-105	1.77495e-104	NC_006072.1	3576094	3577623	+	1530	YALI0_F28083g	GO:0000166;GO:0005525;GO:0005634;GO:0005730;GO:0042254	K14537	-	YALI0F28083p [Yarrowia lipolytica CLIB122]	YALI0_F28083g	YALI0F28083g	2908104
gene872	14611.9	19687.4	9536.44	0.484394	-1.04575	2.1382e-105	1.79357e-104	NC_006068.1	90788	91429	-	642	YALI0_B00704g	GO:0004017;GO:0005524;GO:0006139;GO:0016776;GO:0019205	K00939	[EC:2.7.4.3]	YALI0B00704p [Yarrowia lipolytica CLIB122]	YALI0_B00704g	YALI0B00704g	2907367
gene3193	2094.65	3017.77	1171.53	0.388211	-1.36509	4.39691e-105	3.68341e-104	NC_006070.1	828325	828963	+	639	YALI0_D06457g	GO:0001054;GO:0001055;GO:0001056;GO:0003677;GO:0003899;GO:0005634;GO:0005665;GO:0005666;GO:0005736;GO:0006351;GO:0006360;GO:0006366;GO:0006383	K03013	-	YALI0D06457p [Yarrowia lipolytica CLIB122]	YALI0_D06457g	YALI0D06457g	2910489
gene5291	313.854	555.996	71.7116	0.128979	-2.9548	6.58645e-105	5.49613e-104	NC_006071.1	3214062	3215456	-	1395	YALI0_E27137g	GO:0005634;GO:0005730;GO:0005737;GO:0008033;GO:0008168;GO:0016740;GO:0030488;GO:0032259;GO:0046872;GO:0106050	K15446	[EC:2.1.1.225]	YALI0E27137p [Yarrowia lipolytica CLIB122]	YALI0_E27137g	YALI0E27137g	2912777
gene6874	806.077	1263.26	348.893	0.276184	-1.8563	1.12046e-104	9.32555e-104	NC_006072.1	3450543	3452270	+	1728	YALI0_F27159g	GO:0004672;GO:0004694;GO:0005524;GO:0006468;GO:0010998;GO:0016020;GO:0016021	-	-	YALI0F27159p [Yarrowia lipolytica CLIB122]	YALI0_F27159g	YALI0F27159g	2908025
gene701	1561.29	2297.05	825.523	0.359384	-1.4764	1.50338e-104	1.24964e-103	NC_006067.1	1874351	1875946	+	1596	YALI0_A18007g	GO:0003723;GO:0005515;GO:0005634;GO:0016973;GO:0051028	K14284	-	YALI0A18007p [Yarrowia lipolytica CLIB122]	YALI0_A18007g	YALI0A18007g	2906541
gene6101	476.506	795.885	157.126	0.197423	-2.34064	3.31296e-104	2.74668e-103	NC_006072.1	1336315	1336662	-	270	YALI0_F09768g	GO:0003735;GO:0005739;GO:0005763;GO:0005840;GO:0032543	-	-	YALI0F09768p [Yarrowia lipolytica CLIB122]	YALI0_F09768g	YALI0F09768g	2908976
gene928	472.194	789.55	154.839	0.19611	-2.35026	4.19941e-104	3.47711e-103	NC_006068.1	289650	290984	+	1335	YALI0_B01980g	GO:0005759;GO:0006364;GO:0006391;GO:0008168;GO:0016740;GO:0032259;GO:0034245	K15267	-	YALI0B01980p [Yarrowia lipolytica CLIB122]	YALI0_B01980g	YALI0B01980g	2907452
gene1470	1629.64	2387.03	872.257	0.365415	-1.45239	6.79321e-104	5.60309e-103	NC_006068.1	1958211	1961282	-	3072	YALI0_B14751g	GO:0000154;GO:0000166;GO:0005524;GO:0005634;GO:0005730;GO:0006364;GO:0008033;GO:0008080;GO:0016072;GO:0016740;GO:0016746;GO:0034470;GO:0042274;GO:0051391;GO:1904812;GO:1990883	K14521	[EC:2.3.1.-]	YALI0B14751p [Yarrowia lipolytica CLIB122]	YALI0_B14751g	YALI0B14751g	2907220
gene1906	1989.23	2870.68	1107.78	0.385894	-1.37372	8.72569e-104	7.18778e-103	NC_006069.1	126222	128960	-	2739	YALI0_C00913g	GO:0005515;GO:0032040;GO:0034388	K14556	-	YALI0C00913p [Yarrowia lipolytica CLIB122]	YALI0_C00913g	YALI0C00913g	2909173
gene4673	3129.25	4391.07	1867.43	0.425279	-1.23352	9.94029e-103	8.15689e-102	NC_006071.1	1580810	1582453	-	1644	YALI0_E13123g	GO:0004821;GO:0005524;GO:0005737;GO:0005739;GO:0005829;GO:0006427;GO:0032543	K01892	[EC:6.1.1.21]	YALI0E13123p [Yarrowia lipolytica CLIB122]	YALI0_E13123g	YALI0E13123g	2912018
gene6449	996.992	1587.58	406.402	0.255988	-1.96585	3.44816e-102	2.81512e-101	NC_006072.1	2346904	2348160	+	1257	YALI0_F17622g	GO:0005634;GO:0005730;GO:0006364;GO:0008168;GO:0016433;GO:0016740;GO:0031167;GO:0032259;GO:0042273	K14850	[EC:2.1.1.287]	YALI0F17622p [Yarrowia lipolytica CLIB122]	YALI0_F17622g	YALI0F17622g	2909035
gene4577	481.774	800.929	162.619	0.203038	-2.30018	3.7897e-102	3.09003e-101	NC_006071.1	1350245	1350859	-	615	YALI0_E11011g	GO:0005743;GO:0032981	-	-	YALI0E11011p [Yarrowia lipolytica CLIB122]	YALI0_E11011g	YALI0E11011g	2912735
gene6594	6697.8	9125.67	4269.93	0.467904	-1.09572	6.21134e-102	5.05173e-101	NC_006072.1	2773553	2774581	-	1029	YALI0_F20790g	GO:0003824;GO:0004655;GO:0005829;GO:0006779;GO:0006783;GO:0008270;GO:0016829;GO:0033014;GO:0046872	K01698	[EC:4.2.1.24]	YALI0F20790p [Yarrowia lipolytica CLIB122]	YALI0_F20790g	YALI0F20790g	2908950
gene3449	1917.91	2766.16	1069.66	0.386696	-1.37073	2.01894e-101	1.63994e-100	NC_006070.1	1486931	1488991	-	2061	YALI0_D12012g	GO:0005654;GO:0005730;GO:0030690;GO:0030691;GO:0042273	K14833	-	YALI0D12012p [Yarrowia lipolytica CLIB122]	YALI0_D12012g	YALI0D12012g	2910608
gene5522	1947.12	2803.55	1090.68	0.389037	-1.36202	4.70931e-101	3.8108e-100	NC_006071.1	3805547	3807889	-	2343	YALI0_E32043g	GO:0000462;GO:0005515;GO:0006364;GO:0032040;GO:0034388	K14555	-	YALI0E32043p [Yarrowia lipolytica CLIB122]	YALI0_E32043g	YALI0E32043g	2912113
gene6851	383.987	656.738	111.236	0.169377	-2.56169	1.21814e-100	9.82007e-100	NC_006072.1	3409138	3410067	+	930	YALI0_F26653g	GO:0005730;GO:0032040;GO:0070181	K14773	-	YALI0F26653p [Yarrowia lipolytica CLIB122]	YALI0_F26653g	YALI0F26653g	2908868
gene3487	1148.52	1851.9	445.148	0.240373	-2.05665	1.67756e-100	1.34898e-99	NC_006070.1	1597988	1599475	+	1488	YALI0_D12859g	GO:0005739;GO:0008168;GO:0016740;GO:0019918;GO:0032259;GO:0032981;GO:0035243	-	-	YALI0D12859p [Yarrowia lipolytica CLIB122]	YALI0_D12859g	YALI0D12859g	2911264
gene4063	903.394	1389.26	417.527	0.300539	-1.73438	2.12222e-100	1.70442e-99	NC_006070.1	3542396	3546277	+	3774	YALI0_D26620g	GO:0000166;GO:0000462;GO:0003676;GO:0003723;GO:0004386;GO:0005524;GO:0005634;GO:0005730;GO:0016787	K14780	[EC:3.6.4.13]	YALI0D26620p [Yarrowia lipolytica CLIB122]	YALI0_D26620g	YALI0D26620g	2911129
gene606	1392.26	2054.66	729.86	0.355223	-1.4932	3.26747e-100	2.61438e-99	NC_006067.1	1610165	1611721	+	1557	YALI0_A15708g	-	K14836	-	YALI0A15708p [Yarrowia lipolytica CLIB122]	YALI0_A15708g	YALI0A15708g	2906487
gene6111	992.833	1511.36	474.306	0.313827	-1.67196	3.52598e-100	2.81771e-99	NC_006072.1	1352432	1353385	+	954	YALI0_F09988g	GO:0004222;GO:0006508;GO:0008233;GO:0008237;GO:0016787	K23010	[EC:3.4.24.-]	YALI0F09988p [Yarrowia lipolytica CLIB122]	YALI0_F09988g	YALI0F09988g	2908992
gene2150	1922.87	2809.93	1035.81	0.368624	-1.43978	6.15024e-100	4.90872e-99	NC_006069.1	888219	888734	-	516	YALI0_C06600g	-	-	-	YALI0C06600p [Yarrowia lipolytica CLIB122]	YALI0_C06600g	YALI0C06600g	2909215
gene6621	10085.9	13579.8	6592.04	0.485429	-1.04267	7.24209e-100	5.77298e-99	NC_006072.1	2832802	2833470	-	669	YALI0_F21406g	GO:0004089;GO:0008270;GO:0015976;GO:0016829;GO:0034599;GO:0071244	K01673	[EC:4.2.1.1]	YALI0F21406p [Yarrowia lipolytica CLIB122]	YALI0_F21406g	YALI0F21406g	2908004
gene3404	649.508	1035.41	263.604	0.254588	-1.97376	1.27469e-99	1.01234e-98	NC_006070.1	1378713	1379651	+	939	YALI0_D11000g	GO:0000176;GO:0000177;GO:0000467;GO:0016075;GO:0034427;GO:0034473;GO:0034475;GO:0034476;GO:0043928;GO:0071028;GO:0071035;GO:0071038;GO:0071042	K12589	-	YALI0D11000p [Yarrowia lipolytica CLIB122]	YALI0_D11000g	YALI0D11000g	2910721
gene4364	4090.07	5647.35	2532.78	0.448489	-1.15686	1.62796e-99	1.28812e-98	NC_006071.1	698346	701174	-	2829	YALI0_E06061g	GO:0004608;GO:0005783;GO:0005789;GO:0006629;GO:0006644;GO:0006656;GO:0008168;GO:0008654;GO:0016020;GO:0016021;GO:0016740;GO:0032259	K16369	[EC:2.1.1.17]	YALI0E06061p [Yarrowia lipolytica CLIB122]	YALI0_E06061g	YALI0E06061g	2912345
gene2460	417.831	704.901	130.762	0.185504	-2.43048	1.89964e-99	1.50123e-98	NC_006069.1	1926414	1927718	+	1305	YALI0_C13882g	GO:0003676;GO:0004809;GO:0005737;GO:0008168;GO:0030488;GO:0032259	K15430	[EC:2.1.1.214]	YALI0C13882p [Yarrowia lipolytica CLIB122]	YALI0_C13882g	YALI0C13882g	2909719
gene3998	450.268	751.256	149.28	0.198707	-2.33128	6.05091e-99	4.7526e-98	NC_006070.1	3350057	3352396	+	2340	YALI0_D25124g	-	-	-	YALI0D25124p [Yarrowia lipolytica CLIB122]	YALI0_D25124g	YALI0D25124g	2910854
gene1391	1453.46	2417.28	489.647	0.202561	-2.30357	1.96185e-98	1.53527e-97	NC_006068.1	1735372	1735818	-	447	YALI0_B12958g	GO:0001405;GO:0001671;GO:0005739;GO:0005743;GO:0015031;GO:0016020;GO:0016021;GO:0030150;GO:0032781	K09539	-	YALI0B12958p [Yarrowia lipolytica CLIB122]	YALI0_B12958g	YALI0B12958g	2906859
gene1201	940.641	1434.89	446.394	0.311101	-1.68455	4.39661e-98	3.42808e-97	NC_006068.1	1187549	1189021	+	1473	YALI0_B08624g	GO:0005515;GO:0005634;GO:0008168;GO:0016279;GO:0016740;GO:0018026;GO:0032259	-	-	YALI0B08624p [Yarrowia lipolytica CLIB122]	YALI0_B08624g	YALI0B08624g	2906769
gene4031	1014.56	1536	493.11	0.321035	-1.6392	5.2737e-98	4.10198e-97	NC_006070.1	3444046	3444618	+	573	YALI0_D25894g	GO:0005739;GO:0015035;GO:0016491;GO:0016971;GO:0016972;GO:0050660;GO:0055114	K17783	[EC:1.8.3.2]	YALI0D25894p [Yarrowia lipolytica CLIB122]	YALI0_D25894g	YALI0D25894g	2910130
gene4823	268.219	480.258	56.1804	0.11698	-3.09567	8.54245e-98	6.6204e-97	NC_006071.1	1976387	1976968	+	582	YALI0_E16687g	-	-	-	YALI0E16687p [Yarrowia lipolytica CLIB122]	YALI0_E16687g	YALI0E16687g	2911632
gene6438	841.926	1298.4	385.453	0.296868	-1.75211	1.76253e-97	1.36103e-96	NC_006072.1	2318921	2319472	+	552	YALI0_F17380g	GO:0003723;GO:0005622;GO:0006364;GO:0019843;GO:0030515;GO:0032040;GO:0034457	K14560	-	YALI0F17380p [Yarrowia lipolytica CLIB122]	YALI0_F17380g	YALI0F17380g	2908872
gene6915	629.366	1003.31	255.419	0.254576	-1.97383	2.07465e-97	1.60012e-96	NC_006072.1	3574106	3575470	-	1365	YALI0_F28061g	GO:0005515;GO:0005634;GO:0008168;GO:0016279;GO:0016740;GO:0018026;GO:0032259	K05302	[EC:2.1.1.-]	YALI0F28061p [Yarrowia lipolytica CLIB122]	YALI0_F28061g	YALI0F28061g	2908103
gene2555	4411.33	6054.18	2768.47	0.457282	-1.12884	3.36223e-97	2.59009e-96	NC_006069.1	2289673	2291196	+	1524	YALI0_C16203g	GO:0005515;GO:0005634	K14848	-	YALI0C16203p [Yarrowia lipolytica CLIB122]	YALI0_C16203g	YALI0C16203g	2909254
gene2895	7359.6	9941.44	4777.76	0.48059	-1.05712	6.02591e-97	4.62539e-96	NC_006069.1	3209517	3212918	+	3402	YALI0_C23969g	GO:0000166;GO:0004070;GO:0004151;GO:0005524;GO:0005737;GO:0005829;GO:0006207;GO:0006228;GO:0006807;GO:0019240;GO:0046872	K01955	[EC:6.3.5.5]	YALI0C23969p [Yarrowia lipolytica CLIB122]	YALI0_C23969g	YALI0C23969g	2909603
gene5381	10991.1	14713	7269.22	0.494069	-1.01722	1.85857e-96	1.42151e-95	NC_006071.1	3442593	3443342	+	750	YALI0_E29095g	-	-	-	YALI0E29095p [Yarrowia lipolytica CLIB122]	YALI0_E29095g	YALI0E29095g	2911855
gene5945	904.945	1382.23	427.664	0.309402	-1.69245	2.45844e-96	1.87584e-95	NC_006072.1	931602	932556	+	357	YALI0_F06259g	GO:0016020;GO:0016021	K18181	-	YALI0F06259p [Yarrowia lipolytica CLIB122]	YALI0_F06259g	YALI0F06259g	7009609
gene4763	1122.45	1677.85	567.052	0.337964	-1.56506	4.68968e-96	3.57407e-95	NC_006071.1	1814264	1814842	-	579	YALI0_E15224g	GO:0004497;GO:0005739;GO:0005743;GO:0006744;GO:0008682;GO:0016020;GO:0016491;GO:0016709;GO:0031314;GO:0046872;GO:0055114	K06134	[EC:1.14.99.60]	YALI0E15224p [Yarrowia lipolytica CLIB122]	YALI0_E15224g	YALI0E15224g	2911989
gene6578	217.49	399.497	35.4832	0.0888198	-3.49298	6.04284e-95	4.58356e-94	NC_006072.1	2718477	2719310	-	834	YALI0_F20438g	GO:0000470;GO:0003723;GO:0030686	K14775	-	YALI0F20438p [Yarrowia lipolytica CLIB122]	YALI0_F20438g	YALI0F20438g	2907867
gene4116	620.355	986.414	254.295	0.257798	-1.95569	8.93645e-95	6.7624e-94	NC_006071.1	57099	57464	-	366	YALI0_E00572g	-	K22066	-	YALI0E00572p [Yarrowia lipolytica CLIB122]	YALI0_E00572g	YALI0E00572g	2912884
gene3516	213.409	392.803	34.0139	0.0865927	-3.52961	1.19683e-94	9.04599e-94	NC_006070.1	1676952	1677872	-	921	YALI0_D13574g	-	-	-	YALI0D13574p [Yarrowia lipolytica CLIB122]	YALI0_D13574g	YALI0D13574g	2910252
gene6310	710.176	1108.58	311.773	0.281237	-1.83014	1.377e-93	1.03348e-92	NC_006072.1	1943055	1944839	+	1785	YALI0_F14553g	GO:0017178;GO:0017183	K06927	[EC:6.3.1.14]	YALI0F14553p [Yarrowia lipolytica CLIB122]	YALI0_F14553g	YALI0F14553g	2907768
gene2956	870.613	1531.97	209.262	0.136597	-2.872	4.47834e-93	3.34936e-92	NC_006070.1	97308	97958	+	651	YALI0_D00913g	-	-	-	YALI0D00913p [Yarrowia lipolytica CLIB122]	YALI0_D00913g	YALI0D00913g	2910409
gene6245	411.174	686.652	135.695	0.197618	-2.33922	1.56426e-92	1.16583e-91	NC_006072.1	1755750	1756121	-	372	YALI0_F13101g	GO:0005634;GO:0005730;GO:0006364;GO:0042254	K14822	-	YALI0F13101p [Yarrowia lipolytica CLIB122]	YALI0_F13101g	YALI0F13101g	2909012
gene6617	358.471	610.211	106.731	0.174909	-2.51532	1.62502e-92	1.20971e-91	NC_006072.1	2820605	2823197	+	2538	YALI0_F21329g	GO:0005524;GO:0005634;GO:0016887;GO:0042254;GO:0051973;GO:1990275	K14571	-	YALI0F21329p [Yarrowia lipolytica CLIB122]	YALI0_F21329g	YALI0F21329g	2908020
gene5631	510.574	827.882	193.266	0.233446	-2.09884	4.33218e-92	3.21754e-91	NC_006071.1	4082149	4083693	+	1545	YALI0_E34353g	GO:0000166;GO:0003676;GO:0003723;GO:0003724;GO:0004386;GO:0005524;GO:0005739;GO:0016787;GO:0030490	K17678	[EC:3.6.4.13]	YALI0E34353p [Yarrowia lipolytica CLIB122]	YALI0_E34353g	YALI0E34353g	2912236
gene3084	1608.72	2316.5	900.933	0.388919	-1.36246	6.69982e-92	4.97026e-91	NC_006070.1	503613	504767	+	1155	YALI0_D04026g	GO:0005783;GO:0016020;GO:0016021;GO:0046513;GO:0050291	K04709	[EC:2.3.1.24]	YALI0D04026p [Yarrowia lipolytica CLIB122]	YALI0_D04026g	YALI0D04026g	2911056
gene1647	425.547	706.62	144.473	0.204457	-2.29013	7.12389e-92	5.27266e-91	NC_006068.1	2443350	2444795	+	1446	YALI0_B18612g	GO:0000166;GO:0002098;GO:0003924;GO:0005515;GO:0005525;GO:0005622;GO:0005737;GO:0005739;GO:0006400;GO:0008033;GO:0030488;GO:0048568	K03650	[EC:3.6.-.-]	YALI0B18612p [Yarrowia lipolytica CLIB122]	YALI0_B18612g	YALI0B18612g	2907194
gene5578	205.702	378.498	32.9056	0.0869374	-3.52388	1.8727e-91	1.37969e-90	NC_006071.1	3939365	3942334	+	2970	YALI0_E33209g	GO:0005515;GO:0008033;GO:0008168;GO:0008175;GO:0016740;GO:0030488;GO:0031591;GO:0032259	K15451	-	YALI0E33209p [Yarrowia lipolytica CLIB122]	YALI0_E33209g	YALI0E33209g	2912958
gene5750	759.245	1172.07	346.418	0.295561	-1.75847	2.13708e-91	1.57267e-90	NC_006072.1	309394	311823	-	2430	YALI0_F01969g	GO:0003676;GO:0003723;GO:0003730;GO:0005515;GO:0005634;GO:0005737;GO:0005829;GO:0006396;GO:0008143;GO:0008266;GO:0010494;GO:1990904	-	-	YALI0F01969p [Yarrowia lipolytica CLIB122]	YALI0_F01969g	YALI0F01969g	2908142
gene7007	1421.21	2063.7	778.729	0.377346	-1.40604	6.84832e-91	5.02236e-90	NC_006072.1	3797027	3798106	+	1080	YALI0_F30393g	GO:0003676;GO:0003723;GO:0005634;GO:0005730;GO:0006364;GO:0032040;GO:0042254	K06961	-	90S preribosome/SSU processome component KRR1 [Yarrowia lipolytica CLIB122]	YALI0_F30393g	YALI0F30393g	2907916
gene3131	970.062	1457.56	482.562	0.331075	-1.59477	9.24415e-91	6.77165e-90	NC_006070.1	663591	664538	+	948	YALI0_D05071g	GO:0000014;GO:0000737;GO:0003676;GO:0004519;GO:0004521;GO:0005634;GO:0005739;GO:0005743;GO:0006309;GO:0016787;GO:0046872;GO:0090502	K01173	-	YALI0D05071p [Yarrowia lipolytica CLIB122]	YALI0_D05071g	YALI0D05071g	2910970
gene6081	521.362	840.822	201.901	0.240123	-2.05815	1.08725e-90	7.95537e-90	NC_006072.1	1293578	1294426	-	849	YALI0_F09295g	GO:0001056;GO:0003899;GO:0005634;GO:0005666;GO:0006383	K03025	-	YALI0F09295p [Yarrowia lipolytica CLIB122]	YALI0_F09295g	YALI0F09295g	2908331
gene3331	2181.37	3070.59	1292.16	0.420817	-1.24873	1.2674e-90	9.263e-90	NC_006070.1	1205382	1206980	+	1599	YALI0_D09449g	GO:0000166;GO:0003676;GO:0003723;GO:0003724;GO:0004386;GO:0005524;GO:0005634;GO:0005730;GO:0006364;GO:0016787;GO:0042254	K14811	[EC:3.6.4.13]	YALI0D09449p [Yarrowia lipolytica CLIB122]	YALI0_D09449g	YALI0D09449g	2910846
gene6981	4366.04	5940.22	2791.86	0.469993	-1.08929	1.5141e-90	1.10534e-89	NC_006072.1	3733862	3736114	-	2253	YALI0_F29843g	GO:0000166;GO:0004812;GO:0004825;GO:0005524;GO:0005829;GO:0006412;GO:0006418;GO:0006431;GO:0016874	K01874	[EC:6.1.1.10]	YALI0F29843p [Yarrowia lipolytica CLIB122]	YALI0_F29843g	YALI0F29843g	2908563
gene6512	6926.75	9283.74	4569.77	0.492234	-1.02259	4.00351e-90	2.90946e-89	NC_006072.1	2531144	2534011	+	2868	YALI0_F18942g	GO:0001732;GO:0002183;GO:0002188;GO:0003723;GO:0003729;GO:0003743;GO:0005737;GO:0005852;GO:0006412;GO:0006413;GO:0016282;GO:0033290;GO:0043614;GO:0071540;GO:0071541	K03254	-	YALI0F18942p [Yarrowia lipolytica CLIB122]	YALI0_F18942g	YALI0F18942g	2909029
gene5504	1413.15	2049.08	777.215	0.3793	-1.39859	9.43776e-90	6.84317e-89	NC_006071.1	3755460	3756011	-	552	YALI0_E31735g	-	-	-	YALI0E31735p [Yarrowia lipolytica CLIB122]	YALI0_E31735g	YALI0E31735g	2912069
gene468	1312.39	1999.22	625.566	0.312906	-1.6762	1.15971e-89	8.39938e-89	NC_006067.1	1252622	1256659	-	4038	YALI0_A12001g	GO:0001018;GO:0003677;GO:0003899;GO:0006351;GO:0006390;GO:0016740;GO:0016779;GO:0034245	K10908	[EC:2.7.7.6]	YALI0A12001p [Yarrowia lipolytica CLIB122]	YALI0_A12001g	YALI0A12001g	2906154
gene2993	597.986	945.815	250.157	0.264489	-1.91872	2.61599e-89	1.88404e-88	NC_006070.1	207858	208436	-	579	YALI0_D01782g	GO:0006360	K03003	-	YALI0D01782p [Yarrowia lipolytica CLIB122]	YALI0_D01782g	YALI0D01782g	2910474
gene3102	3841.42	5240.95	2441.88	0.465923	-1.10184	5.46371e-89	3.92616e-88	NC_006070.1	547258	549426	+	2169	YALI0_D04422g	GO:0003958;GO:0005737;GO:0005739;GO:0005741;GO:0005783;GO:0005789;GO:0005829;GO:0005886;GO:0006629;GO:0006694;GO:0006696;GO:0008202;GO:0010181;GO:0016020;GO:0016126;GO:0016491;GO:0050660;GO:0050661;GO:0055114	K00327	[EC:1.6.2.4]	YALI0D04422p [Yarrowia lipolytica CLIB122]	YALI0_D04422g	YALI0D04422g	2911070
gene1411	1577.95	2261.9	894	0.395243	-1.33919	4.88343e-88	3.47032e-87	NC_006068.1	1810491	1813420	-	2880	YALI0_B13442g	GO:0005515;GO:0006364;GO:0032040;GO:0034388	K14554	-	YALI0B13442p [Yarrowia lipolytica CLIB122]	YALI0_B13442g	YALI0B13442g	2907415
gene5334	1488.67	2143.47	833.877	0.389032	-1.36204	6.82551e-88	4.83436e-87	NC_006071.1	3320885	3326581	+	5574	YALI0_E28153g	GO:0004430;GO:0005737;GO:0005886;GO:0016020;GO:0016301;GO:0016310;GO:0016740;GO:0046854;GO:0048015	K00888	[EC:2.7.1.67]	YALI0E28153p [Yarrowia lipolytica CLIB122]	YALI0_E28153g	YALI0E28153g	2912232
gene6478	270.372	474.597	66.1466	0.139374	-2.84296	2.34832e-87	1.65232e-86	NC_006072.1	2422802	2424682	+	1881	YALI0_F18238g	GO:0000166;GO:0003676;GO:0003723;GO:0004386;GO:0005524;GO:0005634;GO:0005730;GO:0006364;GO:0016787;GO:0042254	K14809	[EC:3.6.4.13]	YALI0F18238p [Yarrowia lipolytica CLIB122]	YALI0_F18238g	YALI0F18238g	2908671
gene6277	4364.03	5904.6	2823.47	0.478181	-1.06437	1.16876e-86	8.19666e-86	NC_006072.1	1852766	1857698	-	4887	YALI0_F13783g	GO:0001054;GO:0003677;GO:0003899;GO:0005634;GO:0005736;GO:0006351;GO:0006360;GO:0008270;GO:0016740;GO:0016779	K02999	[EC:2.7.7.6]	YALI0F13783p [Yarrowia lipolytica CLIB122]	YALI0_F13783g	YALI0F13783g	2908682
gene4078	758.793	1160.82	356.766	0.307339	-1.7021	2.62852e-86	1.83939e-85	NC_006070.1	3590823	3592856	-	1950	YALI0_D26994g	GO:0001042;GO:0001181;GO:0005634;GO:0006361	K15216	-	YALI0D26994p [Yarrowia lipolytica CLIB122]	YALI0_D26994g	YALI0D26994g	2911238
gene1980	1573.89	2249.95	897.829	0.399045	-1.32538	2.98429e-86	2.08608e-85	NC_006069.1	376226	377971	-	1746	YALI0_C02717g	GO:0004197;GO:0004843;GO:0006511;GO:0016579;GO:0036459	K11870	[EC:3.4.19.12]	YALI0C02717p [Yarrowia lipolytica CLIB122]	YALI0_C02717g	YALI0C02717g	2909071
gene5056	971.908	1447.22	496.592	0.343134	-1.54316	9.62659e-86	6.71455e-85	NC_006071.1	2589273	2590751	-	1479	YALI0_E21956g	GO:0005515	-	-	YALI0E21956p [Yarrowia lipolytica CLIB122]	YALI0_E21956g	YALI0E21956g	2911963
gene4676	703.766	1084.58	322.957	0.297773	-1.74771	1.05729e-85	7.35859e-85	NC_006071.1	1588302	1591115	+	2814	YALI0_E13189g	GO:0005515	K18730	-	YALI0E13189p [Yarrowia lipolytica CLIB122]	YALI0_E13189g	YALI0E13189g	2912021
gene3393	1322.3	1914.6	730.002	0.381282	-1.39107	1.38976e-85	9.64118e-85	NC_006070.1	1344716	1345699	+	984	YALI0_D10769g	GO:0051087	-	-	YALI0D10769p [Yarrowia lipolytica CLIB122]	YALI0_D10769g	YALI0D10769g	2910439
gene6145	1723.95	2445.44	1002.46	0.409932	-1.28654	1.48349e-85	1.02803e-84	NC_006072.1	1440653	1441405	+	753	YALI0_F10769g	GO:0004222;GO:0005739;GO:0005743;GO:0006508;GO:0008233;GO:0008237;GO:0016020;GO:0016787;GO:0031314;GO:0033615;GO:0034982;GO:0046872	K18156	[EC:3.4.24.-]	YALI0F10769p [Yarrowia lipolytica CLIB122]	YALI0_F10769g	YALI0F10769g	2908892
gene4424	1013	1501.69	524.302	0.349141	-1.51812	2.58372e-85	1.78661e-84	NC_006071.1	857819	858736	+	918	YALI0_E07513g	-	-	-	YALI0E07513p [Yarrowia lipolytica CLIB122]	YALI0_E07513g	YALI0E07513g	2912444
gene4880	5059.3	6795.28	3323.32	0.489062	-1.03191	3.34743e-85	2.30972e-84	NC_006071.1	2121015	2122958	-	1944	YALI0_E17985g	GO:0000166;GO:0004812;GO:0004814;GO:0005524;GO:0005737;GO:0005739;GO:0006412;GO:0006418;GO:0006420;GO:0016874;GO:0032543	K01887	[EC:6.1.1.19]	YALI0E17985p [Yarrowia lipolytica CLIB122]	YALI0_E17985g	YALI0E17985g	2911694
gene4524	4600.61	6198.45	3002.77	0.484439	-1.04561	4.23145e-85	2.91343e-84	NC_006071.1	1199178	1202675	+	3498	YALI0_E09845g	GO:0001054;GO:0003677;GO:0003899;GO:0005634;GO:0005736;GO:0006351;GO:0006360;GO:0016740;GO:0016779;GO:0032549	K03002	[EC:2.7.7.6]	YALI0E09845p [Yarrowia lipolytica CLIB122]	YALI0_E09845g	YALI0E09845g	2912570
gene3253	887.173	1331.44	442.91	0.332655	-1.5879	6.82574e-85	4.67957e-84	NC_006070.1	1002043	1002456	+	414	YALI0_D07766g	GO:0015031;GO:0016020;GO:0016021	-	-	YALI0D07766p [Yarrowia lipolytica CLIB122]	YALI0_D07766g	YALI0D07766g	2910939
gene5241	1006.63	1491.59	521.679	0.349748	-1.51561	7.73798e-85	5.29367e-84	NC_006071.1	3095716	3097584	-	1869	YALI0_E26048g	GO:0002943;GO:0003824;GO:0005634;GO:0005737;GO:0008033;GO:0016491;GO:0017150;GO:0046872;GO:0050660;GO:0055114;GO:0102265	K05544	[EC:1.3.1.89]	YALI0E26048p [Yarrowia lipolytica CLIB122]	YALI0_E26048g	YALI0E26048g	2912622
gene3992	2230.62	3106.89	1354.36	0.43592	-1.19787	8.80055e-85	6.01418e-84	NC_006070.1	3330171	3330554	+	384	YALI0_D24992g	GO:0005739;GO:0031305;GO:0033617;GO:0051082	K18187	-	YALI0D24992p [Yarrowia lipolytica CLIB122]	YALI0_D24992g	YALI0D24992g	2910965
gene2344	4267.95	5759.63	2776.27	0.482022	-1.05283	2.42845e-84	1.65253e-83	NC_006069.1	1523032	1523493	-	462	YALI0_C11011g	GO:0005741;GO:0006886	K17769	-	YALI0C11011p [Yarrowia lipolytica CLIB122]	YALI0_C11011g	YALI0C11011g	2909136
gene5317	1710.47	2461.29	959.658	0.389901	-1.35882	1.40185e-83	9.51922e-83	NC_006071.1	3275130	3276947	+	1818	YALI0_E27720g	GO:0008270	-	-	YALI0E27720p [Yarrowia lipolytica CLIB122]	YALI0_E27720g	YALI0E27720g	2912216
gene4167	1051.17	1547.2	555.13	0.358796	-1.47876	2.42232e-83	1.6414e-82	NC_006071.1	188465	190432	+	1968	YALI0_E01672g	GO:0005739;GO:0005743;GO:0016020;GO:0033615;GO:0048255;GO:0140053	-	-	YALI0E01672p [Yarrowia lipolytica CLIB122]	YALI0_E01672g	YALI0E01672g	2912053
gene3359	808.537	1221.43	395.642	0.323917	-1.6263	2.6925e-83	1.82255e-82	NC_006070.1	1275759	1277309	+	1551	YALI0_D10087g	GO:0000151;GO:0005515	K06867	-	YALI0D10087p [Yarrowia lipolytica CLIB122]	YALI0_D10087g	YALI0D10087g	2910994
gene6051	1279.69	1850.25	709.123	0.383258	-1.38361	2.97995e-83	2.01288e-82	NC_006072.1	1195486	1197624	+	2139	YALI0_F08591g	GO:0004596;GO:0006474;GO:0017196;GO:0031417	K20823	-	YALI0F08591p [Yarrowia lipolytica CLIB122]	YALI0_F08591g	YALI0F08591g	2908480
gene428	804.841	1287.7	321.984	0.250046	-1.99973	1.22543e-82	8.23413e-82	NC_006067.1	1129987	1130781	+	795	YALI0_A10813g	GO:0005739;GO:0006412;GO:0043023	K02838	-	YALI0A10813p [Yarrowia lipolytica CLIB122]	YALI0_A10813g	YALI0A10813g	2906362
gene3913	1292.63	1865	720.262	0.3862	-1.37258	2.16902e-82	1.4544e-81	NC_006070.1	2996957	2999356	-	2400	YALI0_D23133g	GO:0000166;GO:0003676;GO:0003723;GO:0003724;GO:0004386;GO:0005524;GO:0005634;GO:0005730;GO:0006364;GO:0016787;GO:0042254	K14806	[EC:3.6.4.13]	YALI0D23133p [Yarrowia lipolytica CLIB122]	YALI0_D23133g	YALI0D23133g	2910285
gene405	520.789	826.822	214.755	0.259736	-1.94488	2.63936e-82	1.76793e-81	NC_006067.1	1036486	1037709	-	1224	YALI0_A10252g	GO:0071339;GO:0097344	K14827	-	YALI0A10252p [Yarrowia lipolytica CLIB122]	YALI0_A10252g	YALI0A10252g	2905987
gene2424	3740.73	5056.45	2425.02	0.479589	-1.06013	4.74577e-82	3.17225e-81	NC_006069.1	1781298	1782724	+	927	YALI0_C12918g	GO:0004408;GO:0005739;GO:0005743;GO:0016020;GO:0016829;GO:0018063;GO:0046872	K01764	[EC:4.4.1.17]	YALI0C12918p [Yarrowia lipolytica CLIB122]	YALI0_C12918g	YALI0C12918g	2909518
gene3023	626.353	971.246	281.461	0.289794	-1.7869	5.96478e-82	3.98293e-81	NC_006070.1	302985	304574	-	1590	YALI0_D02497g	GO:0004794;GO:0006520;GO:0006566;GO:0006567;GO:0008652;GO:0009082;GO:0009097;GO:0016829;GO:0030170	K01754	[EC:4.3.1.19]	YALI0D02497p [Yarrowia lipolytica CLIB122]	YALI0_D02497g	YALI0D02497g	2910530
gene2085	2175.21	3020.71	1329.71	0.4402	-1.18377	6.51177e-82	4.34366e-81	NC_006069.1	663183	664214	+	1032	YALI0_C05170g	GO:0000105;GO:0000287;GO:0003879;GO:0005737	K00765	[EC:2.4.2.17]	YALI0C05170p [Yarrowia lipolytica CLIB122]	YALI0_C05170g	YALI0C05170g	2909557
gene3124	1307.07	1882.13	732.017	0.388931	-1.36241	6.66701e-82	4.44259e-81	NC_006070.1	627424	628716	+	1293	YALI0_D04917g	GO:0000398;GO:0003676;GO:0003723;GO:0003729;GO:0005829;GO:0006376	-	-	YALI0D04917p [Yarrowia lipolytica CLIB122]	YALI0_D04917g	YALI0D04917g	2910660
gene5153	601.488	936.543	266.432	0.284485	-1.81358	1.79996e-81	1.19693e-80	NC_006071.1	2854491	2856029	+	1539	YALI0_E24035g	GO:0000126;GO:0000995;GO:0001006;GO:0005634;GO:0006352;GO:0006355;GO:0006383;GO:0008134;GO:0017025;GO:0046872;GO:0070897;GO:0070898	K15196	-	YALI0E24035p [Yarrowia lipolytica CLIB122]	YALI0_E24035g	YALI0E24035g	2912695
gene1198	12373.6	18869.6	5877.58	0.311484	-1.68277	1.99507e-81	1.32529e-80	NC_006068.1	1175874	1177474	+	1179	YALI0_B08536g	GO:0003824;GO:0003985;GO:0003988;GO:0005739;GO:0006635;GO:0006696;GO:0016740;GO:0016746;GO:0016747	K00626	[EC:2.3.1.9]	YALI0B08536p [Yarrowia lipolytica CLIB122]	YALI0_B08536g	YALI0B08536g	2907383
gene6208	723.314	1102.26	344.365	0.312416	-1.67846	2.17585e-81	1.44389e-80	NC_006072.1	1606659	1608476	+	1818	YALI0_F12199g	GO:0000455;GO:0001522;GO:0003723;GO:0003824;GO:0009451;GO:0009982	K14655	[EC:5.4.99.28]	YALI0F12199p [Yarrowia lipolytica CLIB122]	YALI0_F12199g	YALI0F12199g	2907960
gene1530	896.419	1335.22	457.618	0.342728	-1.54486	2.2918e-81	1.51926e-80	NC_006068.1	2124473	2125438	-	966	YALI0_B16060g	GO:0005739;GO:0006811;GO:0015075;GO:0016020;GO:0016021;GO:0031966;GO:0034220;GO:0055085	K23503	-	YALI0B16060p [Yarrowia lipolytica CLIB122]	YALI0_B16060g	YALI0B16060g	2906783
gene887	4793.97	6413.22	3174.72	0.495027	-1.01442	2.64598e-81	1.75224e-80	NC_006068.1	170854	171795	-	942	YALI0_B01034g	GO:0003676;GO:0003723;GO:0003743;GO:0005850;GO:0005851;GO:0006413;GO:0033290;GO:0043022;GO:0043614	K03237	-	YALI0B01034p [Yarrowia lipolytica CLIB122]	YALI0_B01034g	YALI0B01034g	2907624
gene4451	1951.58	2725.01	1178.15	0.432346	-1.20974	3.29376e-81	2.17449e-80	NC_006071.1	962949	963293	+	345	YALI0_E08184g	GO:0003712;GO:0003887;GO:0005634;GO:0006260;GO:0016740;GO:0016779;GO:0046982;GO:0071897;GO:1903506	K21752	-	YALI0E08184p [Yarrowia lipolytica CLIB122]	YALI0_E08184g	YALI0E08184g	2912479
gene4463	2108.89	2929.69	1288.1	0.439671	-1.1855	5.58582e-81	3.6801e-80	NC_006071.1	992873	994348	-	1476	YALI0_E08448g	GO:0000056;GO:0005634;GO:0030688;GO:0031902;GO:0034448;GO:0042274	K14798	-	YALI0E08448p [Yarrowia lipolytica CLIB122]	YALI0_E08448g	YALI0E08448g	2912489
gene4999	632.502	1104.94	160.067	0.144866	-2.78721	9.83529e-81	6.45988e-80	NC_006071.1	2445348	2446556	-	1155	YALI0_E20669g	-	K09142	-	YALI0E20669p [Yarrowia lipolytica CLIB122]	YALI0_E20669g	YALI0E20669g	2911829
gene6508	383.841	632.097	135.585	0.2145	-2.22095	1.98685e-80	1.29966e-79	NC_006072.1	2515668	2516654	-	987	YALI0_F18854g	GO:0015095;GO:0016020;GO:0016021;GO:0022857;GO:0055085;GO:1990616	-	-	YALI0F18854p [Yarrowia lipolytica CLIB122]	YALI0_F18854g	YALI0F18854g	2907999
gene1660	728.401	1106.65	350.148	0.316402	-1.66017	2.96292e-80	1.93418e-79	NC_006068.1	2482151	2483470	+	1320	YALI0_B18876g	GO:0008270;GO:0043227;GO:0070290;GO:0070291;GO:0070292	K13985	[EC:3.1.4.54]	YALI0B18876p [Yarrowia lipolytica CLIB122]	YALI0_B18876g	YALI0B18876g	2906930
gene5629	2707.75	3704.23	1711.27	0.461977	-1.11411	3.41464e-80	2.22454e-79	NC_006071.1	4076696	4078504	-	1809	YALI0_E34309g	GO:0005515;GO:0005737;GO:0005786;GO:0006614;GO:0008312;GO:0043022;GO:0048500	K03108	-	YALI0E34309p [Yarrowia lipolytica CLIB122]	YALI0_E34309g	YALI0E34309g	2912366
gene4641	1809.21	2533.14	1085.28	0.428434	-1.22285	8.98599e-80	5.82455e-79	NC_006071.1	1504316	1507516	-	3201	YALI0_E12375g	GO:0032007;GO:0033596;GO:0046627;GO:0051726	-	-	YALI0E12375p [Yarrowia lipolytica CLIB122]	YALI0_E12375g	YALI0E12375g	2912828
gene6752	3067.84	4255.17	1880.5	0.441934	-1.1781	1.24683e-79	8.04919e-79	NC_006072.1	3179797	3180636	-	840	YALI0_F24409g	GO:0016020;GO:0016021;GO:0031305;GO:0033617	-	-	YALI0F24409p [Yarrowia lipolytica CLIB122]	YALI0_F24409g	YALI0F24409g	2908717
gene6569	881.045	1310.26	451.834	0.344844	-1.53598	1.51297e-79	9.7575e-79	NC_006072.1	2696927	2697577	-	651	YALI0_F20240g	GO:0000176;GO:0000177;GO:0005730;GO:0016075;GO:0034427;GO:0034475;GO:0071028;GO:0071051	K12590	-	YALI0F20240p [Yarrowia lipolytica CLIB122]	YALI0_F20240g	YALI0F20240g	2907793
gene4140	2509.5	3442.8	1576.21	0.457828	-1.12712	1.5587e-79	1.00424e-78	NC_006071.1	126860	128389	+	1530	YALI0_E01100g	GO:0005515;GO:0005634	K14791	-	YALI0E01100p [Yarrowia lipolytica CLIB122]	YALI0_E01100g	YALI0E01100g	2912938
gene5111	6912.59	9794.62	4030.56	0.411507	-1.28101	1.65649e-79	1.06617e-78	NC_006071.1	2722333	2722863	-	261	YALI0_E23185g	GO:0000062	K08762	-	YALI0E23185p [Yarrowia lipolytica CLIB122]	YALI0_E23185g	YALI0E23185g	7009567
gene3537	1157.8	1677.17	638.435	0.380662	-1.39342	2.36261e-79	1.51912e-78	NC_006070.1	1736646	1738061	+	1416	YALI0_D14080g	GO:0000462;GO:0005515;GO:0005730;GO:0032040;GO:0080008	K11806	-	YALI0D14080p [Yarrowia lipolytica CLIB122]	YALI0_D14080g	YALI0D14080g	2910229
gene2871	3608.63	4864.4	2352.86	0.48369	-1.04785	3.28222e-79	2.10831e-78	NC_006069.1	3134889	3136721	-	1722	YALI0_C23408g	GO:0003824;GO:0004160;GO:0009082	K01687	[EC:4.2.1.9]	YALI0C23408p [Yarrowia lipolytica CLIB122]	YALI0_C23408g	YALI0C23408g	2909610
gene1377	511.013	807.562	214.464	0.26557	-1.91283	5.92776e-79	3.80384e-78	NC_006068.1	1689693	1691354	-	1662	YALI0_B12628g	GO:0002926;GO:0003824;GO:0004402;GO:0005634;GO:0005737;GO:0008080;GO:0016573;GO:0016740;GO:0016746;GO:0033588;GO:0046872;GO:0051536	K07739	[EC:2.3.1.48]	YALI0B12628p [Yarrowia lipolytica CLIB122]	YALI0_B12628g	YALI0B12628g	2907054
gene3416	1237.92	1781.4	694.432	0.389824	-1.35911	6.15457e-79	3.94544e-78	NC_006070.1	1412159	1414333	+	2175	YALI0_D11242g	GO:0003723;GO:0005634;GO:0005730;GO:0006364;GO:0042254	K14790	-	YALI0D11242p [Yarrowia lipolytica CLIB122]	YALI0_D11242g	YALI0D11242g	2910732
gene899	1167.34	1687.87	646.802	0.383206	-1.38381	8.35449e-79	5.33972e-78	NC_006068.1	219282	221840	+	2559	YALI0_B01320g	-	-	-	YALI0B01320p [Yarrowia lipolytica CLIB122]	YALI0_B01320g	YALI0B01320g	2906768
gene3063	803.638	1204.77	402.505	0.334092	-1.58168	9.83219e-79	6.27793e-78	NC_006070.1	444994	446376	-	1383	YALI0_D03509g	GO:0000166;GO:0005524;GO:0005739;GO:0016020;GO:0016021;GO:0034551	K08900	-	YALI0D03509p [Yarrowia lipolytica CLIB122]	YALI0_D03509g	YALI0D03509g	2910576
gene5958	1079.53	1566.08	592.982	0.37864	-1.4011	6.27354e-77	3.96234e-76	NC_006072.1	961856	962653	-	798	YALI0_F06512g	GO:0005730;GO:0008168;GO:0016435;GO:0070476	K19306	[EC:2.1.1.309]	YALI0F06512p [Yarrowia lipolytica CLIB122]	YALI0_F06512g	YALI0F06512g	2908076
gene3341	644.306	985.699	302.913	0.307308	-1.70224	8.4336e-77	5.32138e-76	NC_006070.1	1225304	1226824	-	1521	YALI0_D09691g	GO:0003723;GO:0005730;GO:0008168;GO:0016740;GO:0032259;GO:0070475	K15264	[EC:2.1.1.311]	YALI0D09691p [Yarrowia lipolytica CLIB122]	YALI0_D09691g	YALI0D09691g	2910917
gene785	237.712	427.007	48.4173	0.113388	-3.14067	1.02574e-76	6.46523e-76	NC_006067.1	2152381	2153826	-	1446	YALI0_A19954g	GO:0005737;GO:0016740;GO:0017183	K17866	-	YALI0A19954p [Yarrowia lipolytica CLIB122]	YALI0_A19954g	YALI0A19954g	2905964
gene1778	458.864	731.888	185.839	0.253918	-1.97757	1.18736e-76	7.46989e-76	NC_006068.1	2825107	2826750	-	1644	YALI0_B21538g	GO:0000166;GO:0003676;GO:0003723;GO:0003724;GO:0004386;GO:0005524;GO:0005634;GO:0005730;GO:0006364;GO:0016787;GO:0030490;GO:0042254	K14779	[EC:3.6.4.13]	YALI0B21538p [Yarrowia lipolytica CLIB122]	YALI0_B21538g	YALI0B21538g	2907486
gene5149	2134.97	2940.21	1329.74	0.452261	-1.14477	2.06019e-76	1.29104e-75	NC_006071.1	2839996	2841015	-	1020	YALI0_E23947g	GO:0001054;GO:0001056;GO:0003677;GO:0003899;GO:0005666;GO:0005736;GO:0006351;GO:0006360;GO:0006383;GO:0046983	K03027	-	YALI0E23947p [Yarrowia lipolytica CLIB122]	YALI0_E23947g	YALI0E23947g	2912691
gene7021	532.788	833.079	232.497	0.279082	-1.84124	2.49042e-76	1.55761e-75	NC_006072.1	3832403	3833665	+	1263	YALI0_F30679g	GO:0003824;GO:0004315;GO:0005739;GO:0006633;GO:0016740;GO:0016747	K09458	[EC:2.3.1.179]	YALI0F30679p [Yarrowia lipolytica CLIB122]	YALI0_F30679g	YALI0F30679g	2907920
gene5304	178.564	325.686	31.4421	0.096541	-3.37271	3.69902e-76	2.30901e-75	NC_006071.1	3241975	3244650	+	2676	YALI0_E27390g	GO:0000175;GO:0000177;GO:0000178;GO:0003723;GO:0004540;GO:0016075;GO:0090503	-	-	YALI0E27390p [Yarrowia lipolytica CLIB122]	YALI0_E27390g	YALI0E27390g	2912249
gene692	3440.09	4622.92	2257.26	0.488277	-1.03423	5.30317e-76	3.30072e-75	NC_006067.1	1845367	1849173	-	3807	YALI0_A17853g	GO:0000182;GO:0000183;GO:0005730;GO:0007000;GO:0019211;GO:0031030;GO:0043085	-	-	YALI0A17853p [Yarrowia lipolytica CLIB122]	YALI0_A17853g	YALI0A17853g	2905940
gene2272	839.802	1260.2	419.406	0.33281	-1.58723	7.73282e-76	4.80363e-75	NC_006069.1	1280222	1280749	+	528	YALI0_C09350g	GO:0005739;GO:0005743;GO:0009060;GO:0016020;GO:0033617	K18184	-	YALI0C09350p [Yarrowia lipolytica CLIB122]	YALI0_C09350g	YALI0C09350g	2909761
gene257	4123.67	6602.54	1644.79	0.249115	-2.00512	8.3415e-76	5.17673e-75	NC_006067.1	644466	644960	+	495	YALI0_A06633g	-	-	-	YALI0A06633p [Yarrowia lipolytica CLIB122]	YALI0_A06633g	YALI0A06633g	2905886
gene3645	1944.19	2690.17	1198.2	0.445399	-1.16683	1.14658e-75	7.08823e-75	NC_006070.1	2077148	2080732	-	2955	YALI0_D16841g	GO:0006281;GO:0007059;GO:0016226;GO:0045893;GO:0097361;GO:0097428;GO:1905168	K15075	-	YALI0D16841p [Yarrowia lipolytica CLIB122]	YALI0_D16841g	YALI0D16841g	2910212
gene825	546.747	850.625	242.87	0.285519	-1.80834	2.05689e-75	1.2667e-74	NC_006067.1	2246913	2248133	+	1221	YALI0_A20922g	GO:0005783;GO:0005789;GO:0006506;GO:0016021;GO:0016740;GO:0016757;GO:0016758	K05284	[EC:2.4.1.-]	YALI0A20922p [Yarrowia lipolytica CLIB122]	YALI0_A20922g	YALI0A20922g	2905761
gene4292	531.881	830.19	233.572	0.281348	-1.82957	2.6761e-75	1.64488e-74	NC_006071.1	505794	506753	-	960	YALI0_E04466g	GO:0016020;GO:0016021	-	-	YALI0E04466p [Yarrowia lipolytica CLIB122]	YALI0_E04466g	YALI0E04466g	2912198
gene369	387.358	684.146	90.5701	0.132384	-2.9172	2.8738e-75	1.76471e-74	NC_006067.1	935855	937240	+	1386	YALI0_A09427g	GO:0000166;GO:0004812;GO:0004829;GO:0005524;GO:0005737;GO:0005739;GO:0006418;GO:0006435;GO:0070159	K01868	[EC:6.1.1.3]	YALI0A09427p [Yarrowia lipolytica CLIB122]	YALI0_A09427g	YALI0A09427g	2905780
gene508	1416.92	2002.57	831.268	0.415101	-1.26847	2.98523e-75	1.83138e-74	NC_006067.1	1339063	1339548	-	486	YALI0_A13035g	-	-	-	YALI0A13035p [Yarrowia lipolytica CLIB122]	YALI0_A13035g	YALI0A13035g	2906417
gene384	3575.83	5174.31	1977.36	0.382149	-1.38779	1.3422e-74	8.19494e-74	NC_006067.1	978999	979952	+	954	YALI0_A09768g	GO:0005506;GO:0005634;GO:0005737;GO:0005829;GO:0009228;GO:0016740;GO:0016763;GO:0046872;GO:0052837	K17606	[EC:2.4.2.60]	YALI0A09768p [Yarrowia lipolytica CLIB122]	YALI0_A09768g	YALI0A09768g	2905790
gene4799	2601.6	3532.64	1670.57	0.472894	-1.08041	1.58374e-74	9.65136e-74	NC_006071.1	1917127	1919013	-	1887	YALI0_E16126g	GO:0005524;GO:0005737;GO:0005739;GO:0016887	-	-	YALI0E16126p [Yarrowia lipolytica CLIB122]	YALI0_E16126g	YALI0E16126g	2911578
gene6624	800.944	1255.68	346.208	0.275714	-1.85876	1.85583e-74	1.1288e-73	NC_006072.1	2850300	2851181	-	882	YALI0_F21483g	GO:0005730;GO:0006364;GO:0030687	K14846	-	YALI0F21483p [Yarrowia lipolytica CLIB122]	YALI0_F21483g	YALI0F21483g	2908008
gene1588	1754.16	2437.96	1070.36	0.439038	-1.18758	2.07459e-74	1.25948e-73	NC_006068.1	2275767	2276735	+	969	YALI0_B17314g	GO:0005739;GO:0033615;GO:0065003	K07555	-	YALI0B17314p [Yarrowia lipolytica CLIB122]	YALI0_B17314g	YALI0B17314g	2906636
gene4536	2077.72	2854.87	1300.58	0.455566	-1.13427	3.72114e-74	2.25057e-73	NC_006071.1	1243766	1245124	-	1359	YALI0_E10109g	GO:0000470;GO:0003723;GO:0030686	K14783	-	YALI0E10109p [Yarrowia lipolytica CLIB122]	YALI0_E10109g	YALI0E10109g	2912585
gene6690	608.463	932.183	284.744	0.305459	-1.71095	3.76658e-74	2.27591e-73	NC_006072.1	3015889	3018876	-	2988	YALI0_F23023g	GO:0008271;GO:0008272;GO:0015116;GO:0016020;GO:0016021;GO:0055085;GO:1902358	K03321	-	YALI0F23023p [Yarrowia lipolytica CLIB122]	YALI0_F23023g	YALI0F23023g	2908789
gene1907	1545.81	2166.08	925.55	0.427294	-1.2267	5.29359e-74	3.19257e-73	NC_006069.1	130976	133000	-	2025	YALI0_C00957g	GO:0003676	K22381	[EC:2.3.2.27]	YALI0C00957p [Yarrowia lipolytica CLIB122]	YALI0_C00957g	YALI0C00957g	2909172
gene4003	1096.55	1579.54	613.55	0.388435	-1.36425	7.1701e-74	4.31619e-73	NC_006070.1	3363075	3364421	-	1347	YALI0_D25234g	GO:0001522;GO:0003723;GO:0005739;GO:0006396;GO:0006400;GO:0009451;GO:0009982;GO:1990481	K03177	[EC:5.4.99.25]	YALI0D25234p [Yarrowia lipolytica CLIB122]	YALI0_D25234g	YALI0D25234g	2910932
gene3175	940.485	1374.01	506.957	0.368961	-1.43846	8.05059e-74	4.84167e-73	NC_006070.1	775996	777318	-	1323	YALI0_D06061g	GO:0016020;GO:0016021	-	-	YALI0D06061p [Yarrowia lipolytica CLIB122]	YALI0_D06061g	YALI0D06061g	2910858
gene2119	1291.85	1834.18	749.515	0.408639	-1.2911	9.49315e-74	5.70389e-73	NC_006069.1	760928	761779	-	852	YALI0_C05929g	-	K22696	[EC:2.1.1.-]	YALI0C05929p [Yarrowia lipolytica CLIB122]	YALI0_C05929g	YALI0C05929g	2909807
gene2636	2849.81	3846.14	1853.48	0.481907	-1.05317	1.05712e-73	6.34571e-73	NC_006069.1	2503916	2504815	-	900	YALI0_C18205g	GO:0005739;GO:0005743;GO:0006744;GO:0008168;GO:0016020;GO:0016740;GO:0031314;GO:0032259;GO:0043333;GO:0043334	K06127	[EC:2.1.1.201]	YALI0C18205p [Yarrowia lipolytica CLIB122]	YALI0_C18205g	YALI0C18205g	2909994
gene4355	1085.33	1563.6	607.069	0.388251	-1.36494	1.94917e-73	1.16569e-72	NC_006071.1	669614	670483	-	870	YALI0_E05863g	GO:0000002;GO:0000262;GO:0000725;GO:0000733;GO:0003677;GO:0003697;GO:0005739;GO:0006281;GO:0006974;GO:0036297;GO:0042645	-	-	YALI0E05863p [Yarrowia lipolytica CLIB122]	YALI0_E05863g	YALI0E05863g	2912335
gene4099	1193.11	1703.81	682.409	0.40052	-1.32005	2.78385e-73	1.66331e-72	NC_006071.1	15919	17214	+	1296	YALI0_E00198g	GO:0044237	K03680	-	YALI0E00198p [Yarrowia lipolytica CLIB122]	YALI0_E00198g	YALI0E00198g	2912862
gene938	1497.53	2099.51	895.556	0.426554	-1.2292	4.11688e-73	2.45293e-72	NC_006068.1	327322	327807	-	486	YALI0_B02222g	GO:0009055;GO:0022900;GO:0051536;GO:0051537	K22071	-	YALI0B02222p [Yarrowia lipolytica CLIB122]	YALI0_B02222g	YALI0B02222g	2906933
gene1876	2922.47	3935.03	1909.91	0.485361	-1.04287	5.43328e-73	3.23427e-72	NC_006069.1	27371	29881	-	2046	YALI0_C00253g	GO:0000287;GO:0003824;GO:0003984;GO:0008652;GO:0009082;GO:0009097;GO:0009099;GO:0016740;GO:0030976;GO:0046872;GO:0050660	K01652	[EC:2.2.1.6]	YALI0C00253p [Yarrowia lipolytica CLIB122]	YALI0_C00253g	YALI0C00253g	2909194
gene6105	1038.19	1499.6	576.788	0.384629	-1.37846	8.21656e-73	4.88201e-72	NC_006072.1	1342866	1344434	-	1569	YALI0_F09856g	GO:0000462;GO:0005515;GO:0005730;GO:0032040	K14768	-	YALI0F09856p [Yarrowia lipolytica CLIB122]	YALI0_F09856g	YALI0F09856g	2908980
gene2670	3339.7	4468.2	2211.2	0.494876	-1.01486	9.73806e-73	5.78068e-72	NC_006069.1	2581759	2583444	-	1686	YALI0_C18997g	GO:0003723;GO:0005047;GO:0005737;GO:0005786;GO:0006614;GO:0008312;GO:0030942	K03107	-	YALI0C18997p [Yarrowia lipolytica CLIB122]	YALI0_C18997g	YALI0C18997g	2909970
gene1633	680.485	1024.9	336.066	0.3279	-1.60867	2.42122e-72	1.4333e-71	NC_006068.1	2399522	2400916	-	1395	YALI0_B18304g	GO:0005737;GO:0006400;GO:0008033;GO:0008479;GO:0016763;GO:0101030	K00773	[EC:2.4.2.29]	YALI0B18304p [Yarrowia lipolytica CLIB122]	YALI0_B18304g	YALI0B18304g	2907555
gene4550	1167.55	1667.66	667.434	0.400221	-1.32113	2.49155e-72	1.47357e-71	NC_006071.1	1287997	1289697	+	1701	YALI0_E10395g	GO:0003723	-	-	YALI0E10395p [Yarrowia lipolytica CLIB122]	YALI0_E10395g	YALI0E10395g	2912599
gene1522	1064.49	1532.28	596.713	0.389429	-1.36057	2.83453e-72	1.67488e-71	NC_006068.1	2106001	2107104	+	1104	YALI0_B15884g	GO:0004395;GO:0005739;GO:0005743;GO:0006744;GO:0008168;GO:0008425;GO:0008689;GO:0016020;GO:0016740;GO:0031314;GO:0032259;GO:0061543;GO:1990886	K00591	-	YALI0B15884p [Yarrowia lipolytica CLIB122]	YALI0_B15884g	YALI0B15884g	2907025
gene5319	1627.13	2264.54	989.72	0.437052	-1.19412	2.93171e-72	1.73071e-71	NC_006071.1	3280491	3281348	-	810	YALI0_E27764g	GO:0003954;GO:0055114;GO:1901006	-	-	YALI0E27764p [Yarrowia lipolytica CLIB122]	YALI0_E27764g	YALI0E27764g	2912218
gene4493	1991.09	2733.03	1249.15	0.457059	-1.12955	4.3366e-72	2.55537e-71	NC_006071.1	1093893	1094297	-	405	YALI0_E09130g	-	-	-	YALI0E09130p [Yarrowia lipolytica CLIB122]	YALI0_E09130g	YALI0E09130g	2912521
gene2230	425.345	678.032	172.658	0.254645	-1.97344	4.90293e-72	2.88643e-71	NC_006069.1	1149092	1149787	+	696	YALI0_C08459g	GO:0010181;GO:0042602;GO:0048037;GO:0055114	-	-	YALI0C08459p [Yarrowia lipolytica CLIB122]	YALI0_C08459g	YALI0C08459g	2909327
gene6342	2483.55	3365.66	1601.44	0.475817	-1.07152	4.94925e-72	2.91103e-71	NC_006072.1	2062934	2063815	-	882	YALI0_F15257g	-	K20815	-	YALI0F15257p [Yarrowia lipolytica CLIB122]	YALI0_F15257g	YALI0F15257g	2908654
gene5051	1663	2309.32	1016.68	0.440251	-1.1836	5.81824e-72	3.41589e-71	NC_006071.1	2579695	2581146	-	1452	YALI0_E21846g	-	K03241	-	YALI0E21846p [Yarrowia lipolytica CLIB122]	YALI0_E21846g	YALI0E21846g	2911959
gene2006	852.241	1252.4	452.081	0.360971	-1.47004	6.01914e-72	3.52738e-71	NC_006069.1	435753	436274	-	522	YALI0_C03267g	GO:0008080	-	-	YALI0C03267p [Yarrowia lipolytica CLIB122]	YALI0_C03267g	YALI0C03267g	2909276
gene4321	1687.74	2340.27	1035.22	0.442352	-1.17673	9.64001e-72	5.64415e-71	NC_006071.1	565649	565983	-	258	YALI0_E05115g	GO:0005739;GO:0005743;GO:0015031;GO:0016020;GO:0042719;GO:0042721;GO:0045039;GO:0046872	K17777	-	YALI0E05115p [Yarrowia lipolytica CLIB122]	YALI0_E05115g	YALI0E05115g	2912275
gene1760	578.199	885.934	270.463	0.305285	-1.71177	1.85356e-71	1.08425e-70	NC_006068.1	2778529	2779026	+	498	YALI0_B21164g	GO:0005634;GO:0048188;GO:0051568	K14969	-	YALI0B21164p [Yarrowia lipolytica CLIB122]	YALI0_B21164g	YALI0B21164g	2906757
gene6475	1435.16	2011.71	858.619	0.426811	-1.22833	2.60214e-71	1.51799e-70	NC_006072.1	2418497	2420413	+	1917	YALI0_F18172g	GO:0005623;GO:0006606;GO:0042273;GO:0051082	-	-	YALI0F18172p [Yarrowia lipolytica CLIB122]	YALI0_F18172g	YALI0F18172g	2908668
gene3207	4083.35	5644.36	2522.34	0.446877	-1.16205	3.37602e-71	1.96766e-70	NC_006070.1	866223	867992	-	1770	YALI0_D06754g	GO:0004322;GO:0005381;GO:0005507;GO:0005886;GO:0010106;GO:0016491;GO:0033215;GO:0033573;GO:0034755;GO:0046872;GO:0055114	K19791	-	YALI0D06754p [Yarrowia lipolytica CLIB122]	YALI0_D06754g	YALI0D06754g	2910503
gene6328	1964.98	2694.09	1235.87	0.458733	-1.12427	6.07066e-71	3.52857e-70	NC_006072.1	1997974	1998780	-	807	YALI0_F14949g	GO:0016020;GO:0016021	K23678	-	YALI0F14949p [Yarrowia lipolytica CLIB122]	YALI0_F14949g	YALI0F14949g	2908036
gene6592	815.013	1200.03	429.995	0.35832	-1.48068	9.20898e-71	5.33821e-70	NC_006072.1	2770015	2772372	-	2358	YALI0_F20746g	GO:0000019;GO:0000166;GO:0000717;GO:0003676;GO:0003677;GO:0003678;GO:0003684;GO:0004386;GO:0005524;GO:0005634;GO:0006139;GO:0006289;GO:0006366;GO:0006468;GO:0006979;GO:0008353;GO:0009411;GO:0016787;GO:0016818;GO:0033683;GO:0045893;GO:0045951	K10844	[EC:3.6.4.12]	YALI0F20746p [Yarrowia lipolytica CLIB122]	YALI0_F20746g	YALI0F20746g	2908576
gene6219	838.232	1403.23	273.229	0.194714	-2.36057	1.13469e-70	6.5716e-70	NC_006072.1	1669099	1670076	-	978	YALI0_F12507g	GO:0016020;GO:0016021	-	-	YALI0F12507p [Yarrowia lipolytica CLIB122]	YALI0_F12507g	YALI0F12507g	2908072
gene4144	761.773	1128.97	394.577	0.349503	-1.51663	1.29958e-70	7.51295e-70	NC_006071.1	134051	135793	+	1743	YALI0_E01188g	GO:0005739;GO:0005743;GO:0007007;GO:0016020;GO:0016021	K17983	-	YALI0E01188p [Yarrowia lipolytica CLIB122]	YALI0_E01188g	YALI0E01188g	2912942
gene6953	451.471	711.869	191.072	0.268409	-1.89749	1.46149e-70	8.43379e-70	NC_006072.1	3670205	3671353	-	1149	YALI0_F29073g	GO:0000387;GO:0000398;GO:0000974;GO:0003676;GO:0003723;GO:0005634;GO:0005681;GO:0006397;GO:0007049;GO:0008380;GO:0017070;GO:0033120;GO:0036002;GO:0045292;GO:0045787;GO:0046872;GO:0071006;GO:0071007	-	-	YALI0F29073p [Yarrowia lipolytica CLIB122]	YALI0_F29073g	YALI0F29073g	2908799
gene1634	937.007	1360.27	513.746	0.37768	-1.40476	1.47715e-70	8.51652e-70	NC_006068.1	2401350	2402072	+	723	YALI0_B18326g	GO:0005634;GO:0005730;GO:0006364;GO:0030529;GO:0042254;GO:0042273	K14839	-	YALI0B18326p [Yarrowia lipolytica CLIB122]	YALI0_B18326g	YALI0B18326g	2907556
gene1996	2588.31	3491.12	1685.51	0.482798	-1.05051	1.81218e-70	1.04294e-69	NC_006069.1	413937	414938	-	1002	YALI0_C03069g	GO:0003714;GO:0005515;GO:0006808;GO:0042128;GO:1903507	K00799	[EC:2.5.1.18]	YALI0C03069p [Yarrowia lipolytica CLIB122]	YALI0_C03069g	YALI0C03069g	2909060
gene670	699.488	1045.52	353.452	0.338062	-1.56464	2.85795e-70	1.64038e-69	NC_006067.1	1789883	1791040	-	1158	YALI0_A17314g	GO:0000413;GO:0003755;GO:0005515;GO:0005634;GO:0005739;GO:0016018;GO:0042026;GO:0051082	-	-	YALI0A17314p [Yarrowia lipolytica CLIB122]	YALI0_A17314g	YALI0A17314g	2906171
gene4742	659.139	1001.37	316.908	0.316475	-1.65984	3.02566e-70	1.73509e-69	NC_006071.1	1761157	1762680	-	1524	YALI0_E14751g	GO:0000162;GO:0004049;GO:0009058	K01657	[EC:4.1.3.27]	YALI0E14751p [Yarrowia lipolytica CLIB122]	YALI0_E14751g	YALI0E14751g	2911530
gene6337	587.315	908.419	266.211	0.293049	-1.77079	3.87669e-70	2.21916e-69	NC_006072.1	2037940	2040096	+	2157	YALI0_F15147g	GO:0000965;GO:0006401;GO:0016817;GO:0045025	K17675	[EC:3.6.4.13]	YALI0F15147p [Yarrowia lipolytica CLIB122]	YALI0_F15147g	YALI0F15147g	2908925
gene1538	951.808	1377.62	525.995	0.381814	-1.38906	6.67439e-70	3.81725e-69	NC_006068.1	2139673	2141916	-	2244	YALI0_B16236g	GO:0000298;GO:0004309;GO:0005773;GO:0005774;GO:0006797;GO:0006798;GO:0016020;GO:0016021;GO:0016787	K06018	[EC:3.6.1.10]	YALI0B16236p [Yarrowia lipolytica CLIB122]	YALI0_B16236g	YALI0B16236g	2906836
gene5279	592.026	903.754	280.299	0.310149	-1.68897	7.26447e-70	4.15103e-69	NC_006071.1	3184377	3186308	-	1932	YALI0_E26873g	GO:0000790;GO:0003712;GO:0060962	K21627	-	YALI0E26873p [Yarrowia lipolytica CLIB122]	YALI0_E26873g	YALI0E26873g	2912765
gene3294	578.876	882.554	275.199	0.311821	-1.68121	1.6762e-69	9.54408e-69	NC_006070.1	1114032	1114910	-	879	YALI0_D08668g	GO:0005634;GO:0006364;GO:0030687;GO:0030688	K14849	-	YALI0D08668p [Yarrowia lipolytica CLIB122]	YALI0_D08668g	YALI0D08668g	2910669
gene3254	551.657	845.699	257.615	0.304618	-1.71493	3.17618e-69	1.80049e-68	NC_006070.1	1003115	1003813	+	699	YALI0_D07788g	GO:0003899;GO:0005634;GO:0005666;GO:0006383	K03024	-	YALI0D07788p [Yarrowia lipolytica CLIB122]	YALI0_D07788g	YALI0D07788g	2910940
gene473	853.289	1246.42	460.157	0.369182	-1.43759	3.27277e-69	1.8536e-68	NC_006067.1	1273269	1274711	-	1443	YALI0_A12133g	GO:0000166;GO:0003676;GO:0003723;GO:0003724;GO:0004386;GO:0005524;GO:0005634;GO:0006364;GO:0016787;GO:0042254	K14777	[EC:3.6.4.13]	YALI0A12133p [Yarrowia lipolytica CLIB122]	YALI0_A12133g	YALI0A12133g	2906192
gene447	659.066	989.142	328.99	0.332601	-1.58813	4.37397e-69	2.47293e-68	NC_006067.1	1179392	1181269	-	1878	YALI0_A11407g	GO:0005515	-	-	YALI0A11407p [Yarrowia lipolytica CLIB122]	YALI0_A11407g	YALI0A11407g	2906564
gene3532	443.694	698.563	188.826	0.270306	-1.88733	5.10401e-69	2.88314e-68	NC_006070.1	1726399	1727679	+	1281	YALI0_D13948g	GO:0005515;GO:0005634;GO:0005656;GO:0006364;GO:0030174;GO:0042254;GO:0097344	K14829	-	YALI0D13948p [Yarrowia lipolytica CLIB122]	YALI0_D13948g	YALI0D13948g	2910269
gene6838	655.158	983.563	326.753	0.332213	-1.58982	6.67987e-69	3.76998e-68	NC_006072.1	3378692	3379840	-	1149	YALI0_F26367g	GO:0000993;GO:0001097;GO:0001113;GO:0005673;GO:0006367;GO:0043565	K03136	-	YALI0F26367p [Yarrowia lipolytica CLIB122]	YALI0_F26367g	YALI0F26367g	2908225
gene3463	720.059	1069.85	370.271	0.346097	-1.53075	7.07054e-69	3.98696e-68	NC_006070.1	1534444	1535691	-	1248	YALI0_D12342g	-	K19323	-	YALI0D12342p [Yarrowia lipolytica CLIB122]	YALI0_D12342g	YALI0D12342g	2910134
gene4130	1434.97	2000.59	869.349	0.434546	-1.20242	1.90865e-68	1.07437e-67	NC_006071.1	89038	91215	-	2178	YALI0_E00880g	GO:0000166;GO:0005524;GO:0016020;GO:0016021;GO:0016887;GO:0042626;GO:0055085	K02021	-	YALI0E00880p [Yarrowia lipolytica CLIB122]	YALI0_E00880g	YALI0E00880g	2912902
gene6521	1261.95	1776.34	747.564	0.420846	-1.24864	2.04183e-68	1.14833e-67	NC_006072.1	2562740	2564038	+	1299	YALI0_F19162g	-	-	-	YALI0F19162p [Yarrowia lipolytica CLIB122]	YALI0_F19162g	YALI0F19162g	2907978
gene418	642.144	964.893	319.395	0.331016	-1.59503	2.90539e-68	1.62971e-67	NC_006067.1	1091709	1092188	-	480	YALI0_A10571g	GO:0005737;GO:0007064;GO:0008080;GO:0016573;GO:0031415	K20793	[EC:2.3.1.258]	YALI0A10571p [Yarrowia lipolytica CLIB122]	YALI0_A10571g	YALI0A10571g	2905923
gene6357	388.115	620.187	156.042	0.251605	-1.99077	6.62754e-68	3.69495e-67	NC_006072.1	2099182	2100288	+	1107	YALI0_F15609g	GO:0016020;GO:0016021	-	-	YALI0F15609p [Yarrowia lipolytica CLIB122]	YALI0_F15609g	YALI0F15609g	2909044
gene4394	2926.59	3904.48	1948.71	0.499097	-1.00261	9.57248e-68	5.33217e-67	NC_006071.1	777880	780138	+	2259	YALI0_E06765g	GO:0000049;GO:0003723;GO:0005634;GO:0005737;GO:0008168;GO:0016428;GO:0016740;GO:0030488;GO:0032259	K15334	[EC:2.1.1.202]	YALI0E06765p [Yarrowia lipolytica CLIB122]	YALI0_E06765g	YALI0E06765g	2912410
gene4113	836.211	1220.1	452.324	0.370727	-1.43157	1.0838e-67	6.02664e-67	NC_006071.1	49851	52736	+	2886	YALI0_E00506g	GO:0003676;GO:0003684;GO:0005515;GO:0005634;GO:0006281;GO:0043161	-	-	YALI0E00506p [Yarrowia lipolytica CLIB122]	YALI0_E00506g	YALI0E00506g	2912881
gene278	2465.13	3314.68	1615.58	0.487401	-1.03682	1.94491e-67	1.07963e-66	NC_006067.1	686888	687382	-	495	YALI0_A07084g	GO:0005739;GO:0005741;GO:0005742;GO:0006605;GO:0006886;GO:0008320;GO:0015450;GO:0016020;GO:0016021;GO:0016031;GO:0030150;GO:0030943;GO:0031307;GO:0070096	K17770	-	YALI0A07084p [Yarrowia lipolytica CLIB122]	YALI0_A07084g	YALI0A07084g	2905859
gene6011	1149.39	1627.1	671.673	0.412804	-1.27647	2.94855e-67	1.63393e-66	NC_006072.1	1101913	1102896	+	984	YALI0_F07689g	-	-	-	YALI0F07689p [Yarrowia lipolytica CLIB122]	YALI0_F07689g	YALI0F07689g	2908393
gene3179	2146.64	3213.62	1079.66	0.335962	-1.57363	5.19449e-67	2.86859e-66	NC_006070.1	788616	789335	+	720	YALI0_D06171g	-	-	-	YALI0D06171p [Yarrowia lipolytica CLIB122]	YALI0_D06171g	YALI0D06171g	2910862
gene6626	2085.52	2826.89	1344.15	0.475487	-1.07252	8.35916e-67	4.60435e-66	NC_006072.1	2852655	2853587	+	933	YALI0_F21505g	GO:0003723;GO:0005737;GO:0005786;GO:0006614;GO:0006617;GO:0008312;GO:0048500	K03105	-	YALI0F21505p [Yarrowia lipolytica CLIB122]	YALI0_F21505g	YALI0F21505g	2908961
gene4210	856.184	1242.89	469.478	0.377731	-1.40457	1.66881e-66	9.16846e-66	NC_006071.1	284398	286500	-	2103	YALI0_E02618g	GO:0000055;GO:0005634;GO:0005730;GO:0015031;GO:0030036;GO:0042254;GO:0042273	K14856	-	YALI0E02618p [Yarrowia lipolytica CLIB122]	YALI0_E02618g	YALI0E02618g	2912111
gene4496	966.273	1386.46	546.091	0.393875	-1.34419	2.60141e-66	1.42677e-65	NC_006071.1	1099456	1100343	+	888	YALI0_E09196g	GO:0000122;GO:0001012;GO:0001139;GO:0003676;GO:0005634;GO:0006351;GO:0006355;GO:0008270;GO:0031440;GO:0031564;GO:0045899;GO:0046872;GO:0051123	K03145	-	YALI0E09196p [Yarrowia lipolytica CLIB122]	YALI0_E09196g	YALI0E09196g	2912524
gene2836	2388.77	3253.89	1523.66	0.468257	-1.09463	2.6114e-66	1.43103e-65	NC_006069.1	3037165	3038862	+	1698	YALI0_C22704g	GO:0000266;GO:0005515;GO:0005739;GO:0005741;GO:0016020;GO:0016559;GO:0030687;GO:0070545	K17970	-	YALI0C22704p [Yarrowia lipolytica CLIB122]	YALI0_C22704g	YALI0C22704g	2909670
gene714	548.109	834.78	261.439	0.313183	-1.67492	2.98729e-66	1.63423e-65	NC_006067.1	1924942	1926099	-	1158	YALI0_A18293g	GO:0000213;GO:0000214;GO:0000379;GO:0090501;GO:0090502	K15326	-	YALI0A18293p [Yarrowia lipolytica CLIB122]	YALI0_A18293g	YALI0A18293g	2906141
gene1084	1289.12	1803.3	774.941	0.429734	-1.21848	4.10198e-66	2.2402e-65	NC_006068.1	774503	775090	-	588	YALI0_B05742g	GO:0008080;GO:0017198;GO:0018002;GO:0031415;GO:1990189;GO:1990190	K20791	[EC:2.3.1.255]	YALI0B05742p [Yarrowia lipolytica CLIB122]	YALI0_B05742g	YALI0B05742g	2907619
gene4772	588.912	887.952	289.872	0.32645	-1.61507	1.44464e-65	7.86279e-65	NC_006071.1	1838412	1838990	-	579	YALI0_E15466g	GO:0000462	K14800	-	YALI0E15466p [Yarrowia lipolytica CLIB122]	YALI0_E15466g	YALI0E15466g	2912005
gene1646	460.869	716.03	205.709	0.28729	-1.79942	1.75405e-65	9.51457e-65	NC_006068.1	2442018	2442956	-	939	YALI0_B18590g	GO:0000166;GO:0005524;GO:0005739;GO:0005743;GO:0016020;GO:0016226;GO:0032981;GO:0046872;GO:0051536;GO:0051539	K03593	-	YALI0B18590p [Yarrowia lipolytica CLIB122]	YALI0_B18590g	YALI0B18590g	2907193
gene1197	909.807	1309.28	510.333	0.389781	-1.35926	3.33997e-65	1.80561e-64	NC_006068.1	1173750	1174649	-	900	YALI0_B08514g	GO:0000176;GO:0000177;GO:0000178;GO:0000467;GO:0006396;GO:0016075;GO:0034427;GO:0034473;GO:0034475;GO:0034476;GO:0043928;GO:0071028;GO:0071035;GO:0071038;GO:0071042	K03678	-	YALI0B08514p [Yarrowia lipolytica CLIB122]	YALI0_B08514g	YALI0B08514g	2907382
gene2799	2075.84	2804.88	1346.8	0.480164	-1.0584	4.28145e-65	2.30874e-64	NC_006069.1	2923851	2927204	-	3354	YALI0_C21846g	GO:0000462;GO:0003924;GO:0005525;GO:0005634;GO:0030686;GO:0034511;GO:0042254	K14569	-	YALI0C21846p [Yarrowia lipolytica CLIB122]	YALI0_C21846g	YALI0C21846g	2909836
gene381	1057.92	1501.04	614.798	0.409582	-1.28777	4.46949e-65	2.4061e-64	NC_006067.1	970454	972571	+	2118	YALI0_A09702g	GO:0005783;GO:0005794	K20286	-	YALI0A09702p [Yarrowia lipolytica CLIB122]	YALI0_A09702g	YALI0A09702g	2905795
gene6054	1331.61	1852.98	810.249	0.437269	-1.19341	8.27241e-65	4.44963e-64	NC_006072.1	1205777	1207840	-	2064	YALI0_F08657g	GO:0000462;GO:0005515;GO:0030686;GO:0032040;GO:0034455	K14548	-	YALI0F08657p [Yarrowia lipolytica CLIB122]	YALI0_F08657g	YALI0F08657g	2908483
gene6588	1504.49	2074.27	934.709	0.450621	-1.15001	9.97207e-65	5.35488e-64	NC_006072.1	2752996	2756427	+	3432	YALI0_F20658g	GO:0002098;GO:0005634;GO:0005737;GO:0033588	K11373	-	YALI0F20658p [Yarrowia lipolytica CLIB122]	YALI0_F20658g	YALI0F20658g	2908572
gene4389	447.84	696.719	198.96	0.285567	-1.8081	1.16906e-64	6.27245e-64	NC_006071.1	766124	768448	-	2325	YALI0_E06655g	GO:0005524;GO:0005737;GO:0016887	K14575	-	YALI0E06655p [Yarrowia lipolytica CLIB122]	YALI0_E06655g	YALI0E06655g	2912404
gene1096	1321.22	1838.49	803.94	0.437282	-1.19337	1.59103e-64	8.52222e-64	NC_006068.1	807698	808720	-	1023	YALI0_B06006g	GO:0003824;GO:0004592;GO:0009058;GO:0015940;GO:0033317	K01918	[EC:6.3.2.1]	YALI0B06006p [Yarrowia lipolytica CLIB122]	YALI0_B06006g	YALI0B06006g	2907224
gene4757	741.503	1087.37	395.636	0.363846	-1.4586	1.99913e-64	1.06904e-63	NC_006071.1	1801480	1802205	-	726	YALI0_E15103g	-	-	-	YALI0E15103p [Yarrowia lipolytica CLIB122]	YALI0_E15103g	YALI0E15103g	2911545
gene6771	434.828	678.192	191.463	0.282315	-1.82462	4.05966e-64	2.1601e-63	NC_006072.1	3218846	3221206	-	2361	YALI0_F24871g	-	-	-	YALI0F24871p [Yarrowia lipolytica CLIB122]	YALI0_F24871g	YALI0F24871g	2908582
gene6759	1391.26	1926.86	855.666	0.444072	-1.17114	4.23361e-64	2.25079e-63	NC_006072.1	3192082	3194208	-	2127	YALI0_F24563g	GO:0005634;GO:0005643;GO:0006406;GO:0006606;GO:0015031;GO:0016020;GO:0017056;GO:0031080;GO:0031965;GO:0045893;GO:0051028	K14304	-	YALI0F24563p [Yarrowia lipolytica CLIB122]	YALI0_F24563g	YALI0F24563g	2908529
gene2418	1566.17	2148.62	983.714	0.457834	-1.1271	1.00297e-63	5.3103e-63	NC_006069.1	1771030	1772616	-	1587	YALI0_C12749g	GO:0001522;GO:0003723;GO:0005634;GO:0008033;GO:0009451;GO:0009982;GO:0016853;GO:0031119;GO:0046872;GO:1990481	K06173	[EC:5.4.99.12]	YALI0C12749p [Yarrowia lipolytica CLIB122]	YALI0_C12749g	YALI0C12749g	2909512
gene2621	683.221	1008.62	357.827	0.35477	-1.49504	1.1506e-63	6.08689e-63	NC_006069.1	2472805	2474370	+	1566	YALI0_C17853g	GO:0005634;GO:0030490;GO:0030686	-	-	YALI0C17853p [Yarrowia lipolytica CLIB122]	YALI0_C17853g	YALI0C17853g	2910004
gene5351	994.385	1414.02	574.745	0.40646	-1.29881	1.33065e-63	7.03359e-63	NC_006071.1	3370075	3371124	+	1050	YALI0_E28490g	GO:0000166;GO:0003723;GO:0004518;GO:0005634;GO:0006353;GO:0006364;GO:0006397;GO:0016787;GO:0046872;GO:0090305	K14845	-	YALI0E28490p [Yarrowia lipolytica CLIB122]	YALI0_E28490g	YALI0E28490g	2911616
gene2823	700.523	1030.71	370.332	0.359296	-1.47675	1.93554e-63	1.01806e-62	NC_006069.1	2986697	2988589	-	1893	YALI0_C22385g	GO:0000166;GO:0004674;GO:0005524;GO:0005829;GO:0006468;GO:0016301;GO:0016310;GO:0016740;GO:0030490;GO:0030688	K07178	[EC:2.7.11.1]	YALI0C22385p [Yarrowia lipolytica CLIB122]	YALI0_C22385g	YALI0C22385g	2909697
gene3307	598.566	896.183	300.949	0.335812	-1.57427	2.08397e-63	1.09524e-62	NC_006070.1	1140313	1141536	+	1224	YALI0_D08932g	GO:0007096;GO:0016020;GO:0016021;GO:0043007	-	-	YALI0D08932p [Yarrowia lipolytica CLIB122]	YALI0_D08932g	YALI0D08932g	2910681
gene2442	723.762	1060.98	386.544	0.364328	-1.45669	2.51052e-63	1.31833e-62	NC_006069.1	1853912	1855567	-	1656	YALI0_C13442g	-	-	-	YALI0C13442p [Yarrowia lipolytica CLIB122]	YALI0_C13442g	YALI0C13442g	2909537
gene5447	647.686	960.956	334.416	0.348003	-1.52283	2.66879e-63	1.39915e-62	NC_006071.1	3594675	3598448	+	3774	YALI0_E30547g	GO:0003677;GO:0003682;GO:0004842;GO:0006355;GO:0008270;GO:0016574;GO:0036205;GO:0043565;GO:0043619;GO:0046872;GO:0048189	-	-	YALI0E30547p [Yarrowia lipolytica CLIB122]	YALI0_E30547g	YALI0E30547g	2912067
gene6372	690.559	1016.76	364.353	0.358346	-1.48057	3.84495e-63	2.01248e-62	NC_006072.1	2142953	2143582	+	630	YALI0_F15895g	GO:0005876;GO:0008608;GO:0042729	-	-	YALI0F15895p [Yarrowia lipolytica CLIB122]	YALI0_F15895g	YALI0F15895g	2908613
gene5574	774.053	1126.09	422.014	0.37476	-1.41596	5.35731e-63	2.7995e-62	NC_006071.1	3933428	3934315	-	888	YALI0_E33121g	GO:0000176;GO:0000177;GO:0000178;GO:0000467;GO:0003723;GO:0034427;GO:0034475;GO:0043928;GO:0071034;GO:0071035;GO:0071038;GO:0071049;GO:0071051	K03681	-	YALI0E33121p [Yarrowia lipolytica CLIB122]	YALI0_E33121g	YALI0E33121g	2911627
gene4800	724.387	1060.69	388.085	0.36588	-1.45056	8.49641e-63	4.43136e-62	NC_006071.1	1919225	1920151	+	927	YALI0_E16148g	-	K17715	-	YALI0E16148p [Yarrowia lipolytica CLIB122]	YALI0_E16148g	YALI0E16148g	2911576
gene5796	357.106	569.652	144.56	0.25377	-1.97841	8.50087e-63	4.43136e-62	NC_006072.1	422706	423698	-	993	YALI0_F03003g	GO:0005719;GO:0005739;GO:0016491;GO:0055114	-	-	YALI0F03003p [Yarrowia lipolytica CLIB122]	YALI0_F03003g	YALI0F03003g	2907754
gene6574	618.422	921.011	315.832	0.342919	-1.54406	1.03566e-62	5.38562e-62	NC_006072.1	2707819	2709804	+	1986	YALI0_F20350g	-	K14828	-	YALI0F20350p [Yarrowia lipolytica CLIB122]	YALI0_F20350g	YALI0F20350g	2907798
gene6909	1975.03	2664.08	1285.98	0.482711	-1.05077	1.15123e-62	5.97691e-62	NC_006072.1	3559678	3560409	-	330	YALI0_F27929g	GO:0005739;GO:0005744;GO:0016020;GO:0016021;GO:0030150;GO:0045039	-	-	YALI0F27929p [Yarrowia lipolytica CLIB122]	YALI0_F27929g	YALI0F27929g	2908107
gene3228	801.48	1160.34	442.622	0.381459	-1.3904	1.64816e-62	8.54989e-62	NC_006070.1	921304	922458	+	1155	YALI0_D07238g	GO:0008757;GO:0032259	K19787	[EC:2.1.1.22]	YALI0D07238p [Yarrowia lipolytica CLIB122]	YALI0_D07238g	YALI0D07238g	2910801
gene1762	647.286	958.189	336.383	0.351062	-1.5102	2.35409e-62	1.21824e-61	NC_006068.1	2784402	2785145	-	744	YALI0_B21208g	GO:0016020;GO:0016021	-	-	YALI0B21208p [Yarrowia lipolytica CLIB122]	YALI0_B21208g	YALI0B21208g	2906740
gene3378	580.436	879.534	281.339	0.319872	-1.64443	2.88847e-62	1.49358e-61	NC_006070.1	1310471	1311160	+	690	YALI0_D10461g	-	-	-	YALI0D10461p [Yarrowia lipolytica CLIB122]	YALI0_D10461g	YALI0D10461g	2911010
gene4182	1070.13	1507.78	632.475	0.419475	-1.25334	2.95405e-62	1.52626e-61	NC_006071.1	211453	211833	+	381	YALI0_E02002g	GO:0005739;GO:0005743	K18171	-	YALI0E02002p [Yarrowia lipolytica CLIB122]	YALI0_E02002g	YALI0E02002g	2912076
gene3524	1293	1792	794.001	0.443082	-1.17435	7.10079e-62	3.64526e-61	NC_006070.1	1704768	1707800	+	3033	YALI0_D13750g	GO:0003676;GO:0004518;GO:0004527;GO:0004534;GO:0005634;GO:0006139;GO:0006353;GO:0006364;GO:0006397;GO:0016787;GO:0090305;GO:0090503	K12619	[EC:3.1.13.-]	YALI0D13750p [Yarrowia lipolytica CLIB122]	YALI0_D13750g	YALI0D13750g	2910260
gene3403	710.994	1040.47	381.514	0.366673	-1.44743	9.36953e-62	4.80609e-61	NC_006070.1	1374391	1378542	-	4152	YALI0_D10989g	GO:0003723;GO:0006396;GO:0008173;GO:0016423;GO:0030488	K15333	[EC:2.1.1.34]	YALI0D10989p [Yarrowia lipolytica CLIB122]	YALI0_D10989g	YALI0D10989g	2910720
gene889	2022.71	2718.36	1327.06	0.488182	-1.03451	1.35541e-61	6.947e-61	NC_006068.1	180487	183207	+	2721	YALI0_B01078g	GO:0000028;GO:0000462;GO:0005515;GO:0032040;GO:0034388	K14558	-	YALI0B01078p [Yarrowia lipolytica CLIB122]	YALI0_B01078g	YALI0B01078g	2907399
gene4782	862.618	1340.34	384.892	0.287159	-1.80008	3.01356e-61	1.5372e-60	NC_006071.1	1877465	1877905	-	441	YALI0_E15686g	GO:0005739;GO:0005743;GO:0016020;GO:0016021;GO:0032592;GO:0034551	-	-	YALI0E15686p [Yarrowia lipolytica CLIB122]	YALI0_E15686g	YALI0E15686g	2911559
gene5971	1329.27	1835.09	823.453	0.448727	-1.15609	4.3014e-61	2.19064e-60	NC_006072.1	996878	998476	+	1599	YALI0_F06776g	GO:0005215;GO:0005351;GO:0005887;GO:0016020;GO:0016021;GO:0022857;GO:0034219;GO:0055085;GO:1902600	-	-	YALI0F06776p [Yarrowia lipolytica CLIB122]	YALI0_F06776g	YALI0F06776g	2908504
gene1368	299.01	486.684	111.336	0.228764	-2.12807	4.5387e-61	2.30966e-60	NC_006068.1	1659079	1660179	-	1101	YALI0_B12430g	GO:0005515	-	-	YALI0B12430p [Yarrowia lipolytica CLIB122]	YALI0_B12430g	YALI0B12430g	2906909
gene7061	523.595	795.015	252.175	0.317195	-1.65656	7.7857e-61	3.9526e-60	NC_006072.1	3917103	3917936	+	834	YALI0_F31537g	-	-	-	YALI0F31537p [Yarrowia lipolytica CLIB122]	YALI0_F31537g	YALI0F31537g	2907894
gene6929	242.016	406.107	77.9257	0.191885	-2.38169	8.10416e-61	4.11102e-60	NC_006072.1	3611758	3613485	-	1728	YALI0_F28391g	GO:0000166;GO:0000398;GO:0003676;GO:0003723;GO:0003724;GO:0004386;GO:0005524;GO:0005634;GO:0005737;GO:0006397;GO:0008026;GO:0008380;GO:0016787;GO:0071013	K12858	[EC:3.6.4.13]	YALI0F28391p [Yarrowia lipolytica CLIB122]	YALI0_F28391g	YALI0F28391g	2908856
gene5308	605.377	899.401	311.354	0.346179	-1.53041	1.09459e-60	5.54381e-60	NC_006071.1	3249373	3250401	-	1029	YALI0_E27533g	GO:0003824;GO:0004721;GO:0005739;GO:0006470;GO:0016787;GO:0046872	K17508	[EC:3.1.3.16]	YALI0E27533p [Yarrowia lipolytica CLIB122]	YALI0_E27533g	YALI0E27533g	2912256
gene5287	975.11	1380.23	569.995	0.412972	-1.27588	1.09795e-60	5.55641e-60	NC_006071.1	3203662	3207987	+	4278	YALI0_E27049g	GO:0005829;GO:0008270;GO:0016567;GO:0043023;GO:0043161;GO:0046872;GO:0061630;GO:0072344;GO:1990112;GO:1990116	K22377	[EC:2.3.2.27]	YALI0E27049p [Yarrowia lipolytica CLIB122]	YALI0_E27049g	YALI0E27049g	2912773
gene5808	856.577	1236.37	476.783	0.385631	-1.37471	2.5433e-60	1.28507e-59	NC_006072.1	459415	460791	+	1377	YALI0_F03300g	GO:0001056;GO:0003677;GO:0003899;GO:0005666;GO:0006383	K03026	-	YALI0F03300p [Yarrowia lipolytica CLIB122]	YALI0_F03300g	YALI0F03300g	2907752
gene5896	711.314	1036.8	385.827	0.372131	-1.42612	3.46235e-60	1.74807e-59	NC_006072.1	787064	788068	-	1005	YALI0_F05258g	-	K18803	[EC:2.1.1.85]	YALI0F05258p [Yarrowia lipolytica CLIB122]	YALI0_F05258g	YALI0F05258g	2908165
gene139	2278.44	3052.1	1504.79	0.493034	-1.02024	3.75361e-60	1.89362e-59	NC_006067.1	387008	389113	-	2106	YALI0_A03509g	GO:0003676;GO:0003723;GO:0005634;GO:1990904	K14573	-	YALI0A03509p [Yarrowia lipolytica CLIB122]	YALI0_A03509g	YALI0A03509g	2905997
gene1344	1767.35	2387.14	1147.55	0.480724	-1.05672	4.18092e-60	2.10588e-59	NC_006068.1	1591857	1592717	+	861	YALI0_B11880g	GO:0000027;GO:0005730	K14820	-	ribosome biogenesis protein BRX1 [Yarrowia lipolytica CLIB122]	YALI0_B11880g	YALI0B11880g	2907418
gene4165	1183.37	1645.16	721.59	0.438614	-1.18898	4.34282e-60	2.18572e-59	NC_006071.1	184985	186484	+	1500	YALI0_E01628g	GO:0005515;GO:0005730;GO:0006364;GO:0045943	K14549	-	YALI0E01628p [Yarrowia lipolytica CLIB122]	YALI0_E01628g	YALI0E01628g	2912046
gene1557	1005.01	1439.58	570.445	0.396259	-1.33548	6.09372e-60	3.06213e-59	NC_006068.1	2193840	2195072	+	1233	YALI0_B16654g	GO:0005515;GO:0005634;GO:0005730;GO:0006364;GO:0030687;GO:0042254;GO:0042273	K14841	-	YALI0B16654p [Yarrowia lipolytica CLIB122]	YALI0_B16654g	YALI0B16654g	2907266
gene6959	629.965	929.31	330.62	0.35577	-1.49098	1.0148e-59	5.07165e-59	NC_006072.1	3678945	3680129	-	1185	YALI0_F29205g	GO:0002943;GO:0003824;GO:0008033;GO:0016491;GO:0017150;GO:0050660;GO:0055114	K05543	[EC:1.3.1.91]	YALI0F29205p [Yarrowia lipolytica CLIB122]	YALI0_F29205g	YALI0F29205g	2908772
gene4805	422.277	652.746	191.808	0.293848	-1.76686	2.51853e-59	1.25282e-58	NC_006071.1	1931654	1933453	-	1800	YALI0_E16258g	GO:0000166;GO:0000448;GO:0005524;GO:0005634;GO:0005730;GO:0006364;GO:0016301;GO:0016310;GO:0016740;GO:0051731	K06947	[EC:2.7.1.-]	YALI0E16258p [Yarrowia lipolytica CLIB122]	YALI0_E16258g	YALI0E16258g	2911583
gene3430	783.566	1159.08	408.056	0.352053	-1.50614	4.45429e-59	2.21061e-58	NC_006070.1	1442236	1442531	+	249	YALI0_D11572g	GO:0005739;GO:0005758;GO:0015031;GO:0046872;GO:0072321	-	-	YALI0D11572p [Yarrowia lipolytica CLIB122]	YALI0_D11572g	YALI0D11572g	2910359
gene218	544.247	814.213	274.281	0.336866	-1.56975	9.69956e-59	4.78785e-58	NC_006067.1	569106	570203	-	1098	YALI0_A05555g	GO:0003824;GO:0004521;GO:0005730;GO:0006396;GO:0042254;GO:0090502	K11108	-	YALI0A05555p [Yarrowia lipolytica CLIB122]	YALI0_A05555g	YALI0A05555g	2905922
gene2198	1912.55	2562.89	1262.22	0.492499	-1.02181	1.36276e-58	6.70103e-58	NC_006069.1	1015297	1016109	+	813	YALI0_C07656g	-	-	-	YALI0C07656p [Yarrowia lipolytica CLIB122]	YALI0_C07656g	YALI0C07656g	2910036
gene2709	3357.94	4665.01	2050.87	0.439628	-1.18564	1.72848e-58	8.47984e-58	NC_006069.1	2687753	2688151	+	399	YALI0_C19822g	-	-	-	YALI0C19822p [Yarrowia lipolytica CLIB122]	YALI0_C19822g	YALI0C19822g	2909929
gene6529	1073.4	1498.01	648.801	0.433109	-1.2072	2.53186e-58	1.23928e-57	NC_006072.1	2579903	2582836	-	2934	YALI0_F19360g	GO:0008270;GO:0016020;GO:0016021;GO:0030176;GO:0030433;GO:0046872	K10661	[EC:2.3.2.27]	YALI0F19360p [Yarrowia lipolytica CLIB122]	YALI0_F19360g	YALI0F19360g	2908305
gene4501	284.488	512.075	56.9006	0.111118	-3.16984	6.95924e-58	3.39342e-57	NC_006071.1	1108630	1109544	-	915	YALI0_E09284g	GO:0005739;GO:0005743;GO:0015187;GO:0016020;GO:0016021;GO:1904983	K15118	-	YALI0E09284p [Yarrowia lipolytica CLIB122]	YALI0_E09284g	YALI0E09284g	2912529
gene5400	1263.37	1782.87	743.874	0.417233	-1.26107	1.44361e-57	7.01261e-57	NC_006071.1	3494598	3499568	-	4908	YALI0_E29506g	GO:0000462;GO:0005634;GO:0005730;GO:0006364;GO:0016020;GO:0016021;GO:0030686;GO:0032040;GO:0034455;GO:0042254;GO:0045943	K14550	-	YALI0E29506p [Yarrowia lipolytica CLIB122]	YALI0_E29506g	YALI0E29506g	2911923
gene5265	205.866	349.925	61.807	0.176629	-2.5012	5.58209e-57	2.70138e-56	NC_006071.1	3150691	3151811	-	1074	YALI0_E26543g	GO:0002100;GO:0003824;GO:0052717;GO:0052718	K15442	-	YALI0E26543p [Yarrowia lipolytica CLIB122]	YALI0_E26543g	YALI0E26543g	2912381
gene4044	532.498	850.917	214.079	0.251586	-1.99088	5.94038e-57	2.8726e-56	NC_006070.1	3486929	3489511	-	2583	YALI0_D26235g	GO:0003824;GO:0005783;GO:0005789;GO:0006506;GO:0016020;GO:0016021;GO:0016740;GO:0030176;GO:0051267;GO:0051377	K05310	[EC:2.7.-.-]	YALI0D26235p [Yarrowia lipolytica CLIB122]	YALI0_D26235g	YALI0D26235g	2911071
gene3261	276.852	450.3	103.405	0.229635	-2.12258	7.84044e-57	3.78287e-56	NC_006070.1	1017670	1018800	-	1131	YALI0_D07920g	GO:0000408;GO:0002949;GO:0004222;GO:0005739;GO:0006508;GO:0008033;GO:0016740;GO:0016746;GO:0016747;GO:0046872;GO:0061711;GO:0072670	K01409	[EC:2.3.1.234]	YALI0D07920p [Yarrowia lipolytica CLIB122]	YALI0_D07920g	YALI0D07920g	2910947
gene1970	782.948	1119.85	446.048	0.398311	-1.32803	1.7409e-56	8.3618e-56	NC_006069.1	348440	350125	-	1686	YALI0_C02475g	GO:0000030;GO:0005783;GO:0005788;GO:0005789;GO:0006487;GO:0006488;GO:0016020;GO:0016021;GO:0016757;GO:0052824;GO:0097502	K03847	[EC:2.4.1.260]	YALI0C02475p [Yarrowia lipolytica CLIB122]	YALI0_C02475g	YALI0C02475g	2909087
gene1274	633.79	926.021	341.559	0.368846	-1.43891	2.33081e-56	1.11701e-55	NC_006068.1	1411460	1411954	+	495	YALI0_B10274g	GO:0005739;GO:0005758	K18185	-	YALI0B10274p [Yarrowia lipolytica CLIB122]	YALI0_B10274g	YALI0B10274g	2906838
gene3441	764.929	1095.86	433.998	0.396034	-1.3363	2.49776e-56	1.19613e-55	NC_006070.1	1461257	1462900	-	1317	YALI0_D11792g	GO:0005515;GO:0005634;GO:0005737;GO:0008168;GO:0016740;GO:0032259	-	-	YALI0D11792p [Yarrowia lipolytica CLIB122]	YALI0_D11792g	YALI0D11792g	2910600
gene5556	525.615	783.534	267.696	0.341653	-1.5494	6.27417e-56	2.98232e-55	NC_006071.1	3878333	3880300	-	1968	YALI0_E32725g	GO:0016020;GO:0016021;GO:0046872	-	-	YALI0E32725p [Yarrowia lipolytica CLIB122]	YALI0_E32725g	YALI0E32725g	2911802
gene1305	541.93	804.493	279.367	0.347258	-1.52592	1.29536e-55	6.13001e-55	NC_006068.1	1488590	1489165	+	576	YALI0_B10978g	GO:0006465;GO:0006508;GO:0006627;GO:0008236;GO:0016020;GO:0016021;GO:0033108;GO:0042720	K09648	[EC:3.4.21.-]	YALI0B10978p [Yarrowia lipolytica CLIB122]	YALI0_B10978g	YALI0B10978g	2906879
gene5516	277.595	449.557	105.632	0.234969	-2.08946	1.34302e-55	6.3509e-55	NC_006071.1	3795363	3796100	+	738	YALI0_E31933g	GO:0001510;GO:0005739;GO:0008168;GO:0008650;GO:0031167;GO:0032259	K15508	[EC:2.1.1.168]	YALI0E31933p [Yarrowia lipolytica CLIB122]	YALI0_E31933g	YALI0E31933g	2912963
gene6369	1445.11	1957.51	932.708	0.476477	-1.06952	2.2929e-55	1.08188e-54	NC_006072.1	2134980	2136332	-	1353	YALI0_F15829g	GO:0000469;GO:0004521;GO:0005634;GO:0005730;GO:0030490;GO:0030688;GO:0042274;GO:0046872;GO:0090502	K11883	-	YALI0F15829p [Yarrowia lipolytica CLIB122]	YALI0_F15829g	YALI0F15829g	2908256
gene4306	211.639	356.416	66.8628	0.187598	-2.41429	2.73354e-55	1.28884e-54	NC_006071.1	535756	536818	-	903	YALI0_E04763g	GO:0003824;GO:0006595;GO:0006596;GO:0016740	-	-	YALI0E04763p [Yarrowia lipolytica CLIB122]	YALI0_E04763g	YALI0E04763g	2912212
gene6606	715.247	1029.06	401.437	0.390102	-1.35808	2.93576e-55	1.38122e-54	NC_006072.1	2802582	2802866	-	285	YALI0_F21087g	GO:0016020;GO:0016021	-	-	YALI0F21087p [Yarrowia lipolytica CLIB122]	YALI0_F21087g	YALI0F21087g	2908941
gene253	719.757	1034.26	405.256	0.391834	-1.35169	3.58146e-55	1.68245e-54	NC_006067.1	628919	630028	-	1110	YALI0_A06523g	GO:0000287;GO:0003676;GO:0004518;GO:0004519;GO:0004523;GO:0016787;GO:0043137;GO:0046872;GO:0090502	K03469	[EC:3.1.26.4]	YALI0A06523p [Yarrowia lipolytica CLIB122]	YALI0_A06523g	YALI0A06523g	2906024
gene6919	171.661	298.873	44.4491	0.148722	-2.74931	4.66273e-55	2.18879e-54	NC_006072.1	3581639	3583072	-	1434	YALI0_F28149g	GO:0000166;GO:0004066;GO:0005524;GO:0006529;GO:0006541;GO:0008652	-	-	YALI0F28149p [Yarrowia lipolytica CLIB122]	YALI0_F28149g	YALI0F28149g	2907683
gene1016	1057.86	1466.23	649.482	0.44296	-1.17475	4.73686e-55	2.22196e-54	NC_006068.1	547414	548388	-	975	YALI0_B04136g	GO:0000166;GO:0000447;GO:0000472;GO:0000480;GO:0003676;GO:0003723;GO:0005634;GO:0005730;GO:0006364;GO:0034462;GO:0042254	K14785	-	YALI0B04136p [Yarrowia lipolytica CLIB122]	YALI0_B04136g	YALI0B04136g	2907052
gene1541	1001	1394.15	607.856	0.436005	-1.19758	5.59206e-55	2.61929e-54	NC_006068.1	2148064	2149965	-	1902	YALI0_B16302g	-	-	-	YALI0B16302p [Yarrowia lipolytica CLIB122]	YALI0_B16302g	YALI0B16302g	2907545
gene4145	6661.66	11235.4	2087.93	0.185834	-2.42791	7.39911e-55	3.46065e-54	NC_006071.1	138714	139751	+	1038	YALI0_E01210g	-	-	-	YALI0E01210p [Yarrowia lipolytica CLIB122]	YALI0_E01210g	YALI0E01210g	2912943
gene370	681.153	1117.25	245.051	0.219334	-2.1888	1.1855e-54	5.52859e-54	NC_006067.1	937602	938079	+	288	YALI0_A09438g	-	-	-	YALI0A09438p [Yarrowia lipolytica CLIB122]	YALI0_A09438g	YALI0A09438g	7009355
gene2850	666.249	963.821	368.678	0.382517	-1.3864	1.56539e-54	7.28963e-54	NC_006069.1	3085603	3088134	-	2532	YALI0_C22990g	GO:0000981;GO:0003677;GO:0005634;GO:0006351;GO:0006355;GO:0006357;GO:0008270;GO:0046872	-	-	YALI0C22990p [Yarrowia lipolytica CLIB122]	YALI0_C22990g	YALI0C22990g	2909639
gene4775	342.321	536.396	148.245	0.276373	-1.85531	2.17807e-54	1.01134e-53	NC_006071.1	1857748	1858878	-	1131	YALI0_E15532g	-	-	-	YALI0E15532p [Yarrowia lipolytica CLIB122]	YALI0_E15532g	YALI0E15532g	2912007
gene474	1383.13	1873.57	892.698	0.476469	-1.06955	4.75226e-54	2.20182e-53	NC_006067.1	1275461	1276681	+	1221	YALI0_A12155g	GO:0000027;GO:0030687	K14859	-	YALI0A12155p [Yarrowia lipolytica CLIB122]	YALI0_A12155g	YALI0A12155g	2905854
gene2629	426.256	648.225	204.287	0.315148	-1.6659	4.92515e-54	2.28028e-53	NC_006069.1	2488560	2493358	+	4734	YALI0_C18051g	GO:0000166;GO:0000324;GO:0005524;GO:0015127;GO:0015723;GO:0016020;GO:0016021;GO:0016887;GO:0042626;GO:0055085	-	-	YALI0C18051p [Yarrowia lipolytica CLIB122]	YALI0_C18051g	YALI0C18051g	2909985
gene4129	302.93	481.983	123.877	0.257015	-1.96008	6.53107e-54	3.01944e-53	NC_006071.1	87797	88861	+	1065	YALI0_E00858g	-	K14530	[EC:3.1.26.5]	YALI0E00858p [Yarrowia lipolytica CLIB122]	YALI0_E00858g	YALI0E00858g	2912901
gene1688	1030.51	1427.32	633.695	0.443976	-1.17145	7.16209e-54	3.30879e-53	NC_006068.1	2579890	2580768	-	879	YALI0_B19558g	GO:0000049;GO:0003723;GO:0005634;GO:0006400;GO:0008033;GO:0008168;GO:0008176;GO:0016740;GO:0030488;GO:0032259;GO:0036265;GO:0106004	K03439	[EC:2.1.1.33]	YALI0B19558p [Yarrowia lipolytica CLIB122]	YALI0_B19558g	YALI0B19558g	2907246
gene2520	607.167	885.315	329.02	0.371642	-1.42802	8.80013e-54	4.05678e-53	NC_006069.1	2138904	2139186	+	198	YALI0_C15304g	-	-	-	YALI0C15304p [Yarrowia lipolytica CLIB122]	YALI0_C15304g	YALI0C15304g	2909403
gene1223	1114.28	1532.63	695.929	0.454076	-1.13899	1.36947e-53	6.29504e-53	NC_006068.1	1245731	1246957	-	1227	YALI0_B09119g	GO:0005737;GO:0030490	K14801	-	YALI0B09119p [Yarrowia lipolytica CLIB122]	YALI0_B09119g	YALI0B09119g	2907306
gene3854	784.233	1112.15	456.318	0.410303	-1.28524	2.57512e-53	1.18201e-52	NC_006070.1	2745530	2749540	+	3855	YALI0_D21684g	GO:0000785;GO:0003677;GO:0005515;GO:0005634;GO:0006355;GO:0010452;GO:0018024;GO:0034968;GO:0046975	K06101	[EC:2.1.1.354]	YALI0D21684p [Yarrowia lipolytica CLIB122]	YALI0_D21684g	YALI0D21684g	2911084
gene1825	462.55	694.478	230.622	0.33208	-1.5904	5.00416e-53	2.29369e-52	NC_006068.1	2970157	2971980	-	1824	YALI0_B22572g	GO:0000166;GO:0003676;GO:0003723;GO:0003724;GO:0004386;GO:0005524;GO:0005634;GO:0005730;GO:0006364;GO:0016787;GO:0042254	K14807	[EC:3.6.4.13]	YALI0B22572p [Yarrowia lipolytica CLIB122]	YALI0_B22572g	YALI0B22572g	2907481
gene4833	979.88	1359.83	599.928	0.441178	-1.18057	7.0447e-53	3.22438e-52	NC_006071.1	2003914	2005614	+	1701	YALI0_E16907g	GO:0016773	K00866	[EC:2.7.1.32]	YALI0E16907p [Yarrowia lipolytica CLIB122]	YALI0_E16907g	YALI0E16907g	2911642
gene3234	1499.8	2013.3	986.305	0.489894	-1.02946	1.62131e-52	7.38392e-52	NC_006070.1	941819	943165	+	1347	YALI0_D07370g	GO:0000166;GO:0004088;GO:0005524;GO:0005737;GO:0005951;GO:0006207;GO:0006526;GO:0006541;GO:0006807;GO:0008652;GO:0016874	K01956	[EC:6.3.5.5]	YALI0D07370p [Yarrowia lipolytica CLIB122]	YALI0_D07370g	YALI0D07370g	2910891
gene3208	849.071	1191.82	506.326	0.424836	-1.23502	2.21986e-52	1.01027e-51	NC_006070.1	870469	871332	-	864	YALI0_D06776g	GO:0000176;GO:0000177;GO:0005730;GO:0016075;GO:0034427;GO:0034475;GO:0071028;GO:0071051	K11600	-	YALI0D06776p [Yarrowia lipolytica CLIB122]	YALI0_D06776g	YALI0D06776g	2910504
gene725	518.157	765.738	270.577	0.353354	-1.50081	2.70432e-52	1.22814e-51	NC_006067.1	1990632	1991702	+	1071	YALI0_A18568g	GO:0000413;GO:0003755;GO:0005634;GO:0005681;GO:0005737;GO:0006397;GO:0008380;GO:0016853	K01802	[EC:5.2.1.8]	YALI0A18568p [Yarrowia lipolytica CLIB122]	YALI0_A18568g	YALI0A18568g	2905736
gene4324	806.571	1137.06	476.082	0.418696	-1.25603	3.60329e-52	1.63293e-51	NC_006071.1	569578	569991	+	414	YALI0_E05181g	GO:0005759;GO:0033615	K18191	-	YALI0E05181p [Yarrowia lipolytica CLIB122]	YALI0_E05181g	YALI0E05181g	2912278
gene4262	638.296	920.335	356.256	0.387094	-1.36924	8.39567e-52	3.77805e-51	NC_006071.1	424786	425520	-	735	YALI0_E03806g	GO:0004061;GO:0006569;GO:0009056;GO:0009435;GO:0016787;GO:0019441;GO:0034354	K14263	[EC:3.5.1.9]	YALI0E03806p [Yarrowia lipolytica CLIB122]	YALI0_E03806g	YALI0E03806g	2912166
gene2047	1254	1701.4	806.597	0.474078	-1.0768	8.4997e-52	3.82218e-51	NC_006069.1	562874	564145	-	1272	YALI0_C04213g	GO:0005634;GO:0005730;GO:0005737;GO:0006364;GO:0030515;GO:0030688	K14797	-	YALI0C04213p [Yarrowia lipolytica CLIB122]	YALI0_C04213g	YALI0C04213g	2909395
gene3379	462.082	690.968	233.196	0.337492	-1.56708	1.18281e-51	5.30405e-51	NC_006070.1	1311332	1312129	-	798	YALI0_D10483g	-	-	-	YALI0D10483p [Yarrowia lipolytica CLIB122]	YALI0_D10483g	YALI0D10483g	2911011
gene4704	338.723	527.189	150.257	0.285015	-1.81089	1.19191e-51	5.33738e-51	NC_006071.1	1668881	1672186	-	3306	YALI0_E13882g	GO:0016020;GO:0016021	-	-	YALI0E13882p [Yarrowia lipolytica CLIB122]	YALI0_E13882g	YALI0E13882g	2911489
gene5266	1459.92	1958.39	961.441	0.490933	-1.0264	1.75509e-51	7.84291e-51	NC_006071.1	3153122	3154791	+	1332	YALI0_E26565g	GO:0008654;GO:0016020;GO:0016021;GO:0016740;GO:0016780	-	-	YALI0E26565p [Yarrowia lipolytica CLIB122]	YALI0_E26565g	YALI0E26565g	2912382
gene6341	895.32	1247.36	543.285	0.43555	-1.19909	2.08132e-51	9.2878e-51	NC_006072.1	2051177	2052055	+	879	YALI0_F15235g	GO:0003676;GO:0005634;GO:0005730;GO:0006364;GO:0042254	K11135	-	YALI0F15235p [Yarrowia lipolytica CLIB122]	YALI0_F15235g	YALI0F15235g	2908653
gene1339	770.479	1087.86	453.097	0.416503	-1.2636	3.85586e-51	1.71469e-50	NC_006068.1	1579905	1581356	-	1452	YALI0_B11770g	-	-	-	YALI0B11770p [Yarrowia lipolytica CLIB122]	YALI0_B11770g	YALI0B11770g	2907233
gene1746	871.705	1216.84	526.567	0.432732	-1.20845	4.2398e-51	1.88282e-50	NC_006068.1	2750833	2751417	+	585	YALI0_B20900g	GO:0005515	K06867	-	YALI0B20900p [Yarrowia lipolytica CLIB122]	YALI0_B20900g	YALI0B20900g	2907061
gene5457	460.471	687.652	233.291	0.339257	-1.55955	4.8208e-51	2.1364e-50	NC_006071.1	3616204	3616659	+	456	YALI0_E30745g	GO:0031307;GO:0045040;GO:0070096	-	-	YALI0E30745p [Yarrowia lipolytica CLIB122]	YALI0_E30745g	YALI0E30745g	2911972
gene256	381.031	582.377	179.686	0.308539	-1.69648	5.59829e-51	2.47754e-50	NC_006067.1	639490	641811	-	2322	YALI0_A06611g	GO:0005515;GO:0005739;GO:0006397;GO:0008380	-	-	YALI0A06611p [Yarrowia lipolytica CLIB122]	YALI0_A06611g	YALI0A06611g	2905884
gene2411	464.989	692.604	237.375	0.342728	-1.54486	1.21679e-50	5.36641e-50	NC_006069.1	1753223	1755412	-	2190	YALI0_C12573g	-	-	-	YALI0C12573p [Yarrowia lipolytica CLIB122]	YALI0_C12573g	YALI0C12573g	2909390
gene4942	383.137	584.084	182.189	0.311923	-1.68074	2.29553e-50	1.01032e-49	NC_006071.1	2311304	2313238	-	1935	YALI0_E19382g	GO:0000126;GO:0000995;GO:0001156;GO:0003677;GO:0006383;GO:0070898	K15198	-	YALI0E19382p [Yarrowia lipolytica CLIB122]	YALI0_E19382g	YALI0E19382g	2911760
gene6259	415.907	627.541	204.273	0.325514	-1.61921	2.4012e-50	1.05538e-49	NC_006072.1	1797110	1798054	-	945	YALI0_F13387g	GO:0016020;GO:0016021;GO:0031305;GO:0032977;GO:0032979;GO:0033617;GO:0051205	K17797	-	YALI0F13387p [Yarrowia lipolytica CLIB122]	YALI0_F13387g	YALI0F13387g	2907878
gene1769	1185.95	1609.92	761.988	0.473309	-1.07915	2.7073e-50	1.18666e-49	NC_006068.1	2802003	2802446	+	444	YALI0_B21362g	GO:0016020;GO:0016021	-	-	YALI0B21362p [Yarrowia lipolytica CLIB122]	YALI0_B21362g	YALI0B21362g	2906828
gene6304	1264.73	1708.34	821.121	0.480654	-1.05693	3.27263e-50	1.43055e-49	NC_006072.1	1926894	1927646	+	753	YALI0_F14421g	GO:0003729;GO:0005849;GO:0006378;GO:0006397	K14397	-	YALI0F14421p [Yarrowia lipolytica CLIB122]	YALI0_F14421g	YALI0F14421g	2908357
gene6232	749.413	1059.35	439.48	0.41486	-1.2693	4.06029e-50	1.77124e-49	NC_006072.1	1710165	1711280	+	1116	YALI0_F12771g	GO:0000049;GO:0005634;GO:0005737;GO:0005739;GO:0008033;GO:0008168;GO:0009019;GO:0016740;GO:0030488;GO:0032259;GO:0052905;GO:0090646	K15445	[EC:2.1.1.221]	YALI0F12771p [Yarrowia lipolytica CLIB122]	YALI0_F12771g	YALI0F12771g	2908201
gene5037	92.0203	172.944	11.096	0.0641595	-3.96219	7.75629e-50	3.37667e-49	NC_006071.1	2550105	2551004	+	900	YALI0_E21527g	-	-	-	YALI0E21527p [Yarrowia lipolytica CLIB122]	YALI0_E21527g	YALI0E21527g	2911899
gene6229	356.253	547.259	165.248	0.301955	-1.7276	8.62021e-50	3.74769e-49	NC_006072.1	1703318	1705441	+	2124	YALI0_F12705g	-	-	-	YALI0F12705p [Yarrowia lipolytica CLIB122]	YALI0_F12705g	YALI0F12705g	2908047
gene1828	1043.12	1428.21	658.021	0.460731	-1.118	1.11742e-49	4.8449e-49	NC_006068.1	2974909	2975444	-	480	YALI0_B22638g	GO:0000166;GO:0005524;GO:0005634;GO:0016740;GO:0016925;GO:0019789;GO:0061656	K10577	-	YALI0B22638p [Yarrowia lipolytica CLIB122]	YALI0_B22638g	YALI0B22638g	2907290
gene6048	412.592	664.191	160.992	0.242389	-2.04461	1.76406e-49	7.61776e-49	NC_006072.1	1189302	1190393	-	1092	YALI0_F08503g	-	-	-	YALI0F08503p [Yarrowia lipolytica CLIB122]	YALI0_F08503g	YALI0F08503g	2908493
gene6535	646.442	923.485	369.399	0.400006	-1.32191	4.18285e-49	1.79781e-48	NC_006072.1	2599824	2600333	+	510	YALI0_F19492g	GO:0016020;GO:0016021	-	-	YALI0F19492p [Yarrowia lipolytica CLIB122]	YALI0_F19492g	YALI0F19492g	2907674
gene3962	549.857	799.124	300.589	0.376149	-1.41063	5.73359e-49	2.46103e-48	NC_006070.1	3197071	3198465	-	1395	YALI0_D24211g	GO:0004197;GO:0004843;GO:0006511;GO:0016579;GO:0036459	K11873	[EC:3.4.19.12]	YALI0D24211p [Yarrowia lipolytica CLIB122]	YALI0_D24211g	YALI0D24211g	2911019
gene7067	447.568	665.222	229.915	0.345621	-1.53274	1.58616e-48	6.77655e-48	NC_006072.1	3925713	3926810	-	1098	YALI0_F31647g	GO:0003677;GO:0005664;GO:0006260	K02608	-	YALI0F31647p [Yarrowia lipolytica CLIB122]	YALI0_F31647g	YALI0F31647g	2908281
gene4171	410.293	616.065	204.521	0.33198	-1.59083	2.5073e-48	1.07048e-47	NC_006071.1	193622	194818	+	1197	YALI0_E01760g	GO:0003924;GO:0005525;GO:0005739	K19828	-	YALI0E01760p [Yarrowia lipolytica CLIB122]	YALI0_E01760g	YALI0E01760g	2912057
gene5838	1386.38	1850.5	922.255	0.498381	-1.00468	2.96053e-48	1.2623e-47	NC_006072.1	593574	594110	+	537	YALI0_F03949g	GO:0005739;GO:0006457;GO:0008270;GO:0030150;GO:0046872;GO:0050821;GO:0051087	K17808	-	YALI0F03949p [Yarrowia lipolytica CLIB122]	YALI0_F03949g	YALI0F03949g	2907707
gene2759	486.318	714.882	257.754	0.360554	-1.47171	4.11615e-48	1.74923e-47	NC_006069.1	2808810	2809883	+	1074	YALI0_C20955g	-	-	-	YALI0C20955p [Yarrowia lipolytica CLIB122]	YALI0_C20955g	YALI0C20955g	2909871
gene6380	620.064	887.134	352.994	0.397903	-1.32951	4.46272e-48	1.894e-47	NC_006072.1	2159587	2159928	+	342	YALI0_F16071g	-	K22075	-	YALI0F16071p [Yarrowia lipolytica CLIB122]	YALI0_F16071g	YALI0F16071g	2908584
gene669	327.635	505.932	149.337	0.295172	-1.76037	5.0185e-48	2.12847e-47	NC_006067.1	1788293	1789348	-	1056	YALI0_A17292g	GO:0003676;GO:0004652;GO:0008270;GO:0043633	K12597	-	YALI0A17292p [Yarrowia lipolytica CLIB122]	YALI0_A17292g	YALI0A17292g	2905901
gene1826	402.082	604.537	199.627	0.330215	-1.59852	6.5203e-48	2.76177e-47	NC_006068.1	2972128	2972717	+	270	YALI0_B22594g	GO:0000028;GO:0003723;GO:0003735;GO:0005763;GO:0005840;GO:0006412	-	-	mitochondrial 37S ribosomal protein RSM19 [Yarrowia lipolytica CLIB122]	YALI0_B22594g	YALI0B22594g	2907482
gene652	311.919	484.616	139.223	0.287284	-1.79945	8.79531e-48	3.72292e-47	NC_006067.1	1743518	1744417	-	900	YALI0_A16863g	GO:0008517;GO:0015230;GO:0015884;GO:0016020;GO:0016021;GO:0022857;GO:0035350;GO:0055085	K15115	-	YALI0A16863p [Yarrowia lipolytica CLIB122]	YALI0_A16863g	YALI0A16863g	2906312
gene3746	499.363	730.939	267.788	0.366361	-1.44866	1.10897e-47	4.69102e-47	NC_006070.1	2416320	2417366	-	1047	YALI0_D19118g	GO:0005634;GO:0005737;GO:0006364;GO:0030490;GO:0042254	K09140	-	YALI0D19118p [Yarrowia lipolytica CLIB122]	YALI0_D19118g	YALI0D19118g	2911153
gene206	954.804	1309.68	599.927	0.458071	-1.12636	1.14749e-47	4.85076e-47	NC_006067.1	537135	538529	-	1395	YALI0_A05181g	GO:0000027;GO:0005634;GO:0005654;GO:0005730;GO:0006364;GO:0008097;GO:0042254	K14840	-	YALI0A05181p [Yarrowia lipolytica CLIB122]	YALI0_A05181g	YALI0A05181g	2906142
gene6850	592.786	925.996	259.576	0.28032	-1.83485	1.26782e-47	5.35589e-47	NC_006072.1	3406586	3408301	+	1716	YALI0_F26631g	GO:0000243;GO:0000395;GO:0005515;GO:0005685;GO:0006396;GO:0030627;GO:0071004	K13217	-	YALI0F26631p [Yarrowia lipolytica CLIB122]	YALI0_F26631g	YALI0F26631g	2908867
gene3978	261.525	416.163	106.888	0.256841	-1.96105	1.30985e-47	5.52617e-47	NC_006070.1	3267394	3268023	-	630	YALI0_D24563g	-	-	-	YALI0D24563p [Yarrowia lipolytica CLIB122]	YALI0_D24563g	YALI0D24563g	2910449
gene4731	11066.7	14967.6	7165.93	0.478764	-1.06261	3.11233e-47	1.30706e-46	NC_006071.1	1735705	1736420	+	459	YALI0_E14487g	GO:0006626;GO:0016020;GO:0016021;GO:0031307;GO:1990593	-	-	YALI0E14487p [Yarrowia lipolytica CLIB122]	YALI0_E14487g	YALI0E14487g	2911516
gene5303	331.877	509.491	154.263	0.302778	-1.72367	9.45987e-47	3.94182e-46	NC_006071.1	3240845	3241555	-	711	YALI0_E27368g	GO:0004725;GO:0005737;GO:0035335	-	-	YALI0E27368p [Yarrowia lipolytica CLIB122]	YALI0_E27368g	YALI0E27368g	2912248
gene5628	799.829	1110.85	488.81	0.440033	-1.18432	1.31841e-46	5.47587e-46	NC_006071.1	4075814	4076356	+	543	YALI0_E34287g	GO:0003723;GO:0005634;GO:0005730;GO:0030687;GO:0042254;GO:0042255;GO:0042273	K07565	-	ribosome biogenesis protein NIP7 [Yarrowia lipolytica CLIB122]	YALI0_E34287g	YALI0E34287g	2912365
gene5389	590.797	845.538	336.055	0.397446	-1.33117	1.61663e-46	6.70149e-46	NC_006071.1	3467719	3468529	-	513	YALI0_E29293g	GO:0000339;GO:0000398;GO:0003676;GO:0003723;GO:0005634;GO:0005846;GO:0006397;GO:0008380;GO:0045292	K12883	-	YALI0E29293p [Yarrowia lipolytica CLIB122]	YALI0_E29293g	YALI0E29293g	2912235
gene555	1179.66	1584.67	774.646	0.488839	-1.03257	2.80427e-46	1.16097e-45	NC_006067.1	1455960	1456994	+	1035	YALI0_A14388g	GO:0005739;GO:0032981	K18163	-	YALI0A14388p [Yarrowia lipolytica CLIB122]	YALI0_A14388g	YALI0A14388g	2906249
gene6060	455.187	670.076	240.298	0.358613	-1.4795	3.6496e-46	1.50802e-45	NC_006072.1	1227938	1231051	-	3066	YALI0_F08811g	GO:0046872	-	-	YALI0F08811p [Yarrowia lipolytica CLIB122]	YALI0_F08811g	YALI0F08811g	2907875
gene3761	771.682	1074.09	469.272	0.436901	-1.19462	4.25153e-46	1.75447e-45	NC_006070.1	2462731	2463531	+	801	YALI0_D19448g	GO:0001056;GO:0003899;GO:0005634;GO:0005666;GO:0006351;GO:0006383	K14721	-	YALI0D19448p [Yarrowia lipolytica CLIB122]	YALI0_D19448g	YALI0D19448g	2911166
gene4082	779.748	1084.02	475.478	0.438626	-1.18894	4.42381e-46	1.8244e-45	NC_006070.1	3605429	3606142	-	714	YALI0_D27082g	GO:0005739;GO:0008137;GO:0009055;GO:0016020;GO:0022900;GO:0045333	K18160	-	YALI0D27082p [Yarrowia lipolytica CLIB122]	YALI0_D27082g	YALI0D27082g	2911242
gene3214	412.09	613.415	210.765	0.343593	-1.54123	6.1462e-46	2.52822e-45	NC_006070.1	884660	885357	-	246	YALI0_D06908g	GO:0005739;GO:0005758;GO:0015031;GO:0042719;GO:0045039;GO:0046872;GO:0072321	K17781	-	YALI0D06908p [Yarrowia lipolytica CLIB122]	YALI0_D06908g	YALI0D06908g	2910786
gene5912	785.019	1089.37	480.664	0.44123	-1.1804	9.63994e-46	3.95016e-45	NC_006072.1	832419	833489	+	1071	YALI0_F05588g	GO:0005515;GO:0005634;GO:0005730	-	-	YALI0F05588p [Yarrowia lipolytica CLIB122]	YALI0_F05588g	YALI0F05588g	2907934
gene6947	858.901	1181.66	536.139	0.453716	-1.14014	1.32857e-45	5.42675e-45	NC_006072.1	3661782	3664544	+	2763	YALI0_F28831g	GO:0003677;GO:0003682;GO:0005524;GO:0005634;GO:0008094;GO:0043044	K14439	[EC:3.6.4.12]	YALI0F28831p [Yarrowia lipolytica CLIB122]	YALI0_F28831g	YALI0F28831g	2907888
gene4968	794.141	1121.55	466.733	0.416151	-1.26482	2.20258e-45	8.97966e-45	NC_006071.1	2376320	2377528	+	1209	YALI0_E19965g	GO:0003676	-	-	YALI0E19965p [Yarrowia lipolytica CLIB122]	YALI0_E19965g	YALI0E19965g	2911789
gene1965	771.746	1071.39	472.108	0.440652	-1.18229	2.25495e-45	9.18733e-45	NC_006069.1	330093	334085	-	3993	YALI0_C02365g	GO:0000166;GO:0003676;GO:0003723;GO:0004386;GO:0005515;GO:0005524;GO:0016787	-	-	YALI0C02365p [Yarrowia lipolytica CLIB122]	YALI0_C02365g	YALI0C02365g	2909083
gene2576	392.611	586.004	199.219	0.339961	-1.55656	6.059e-45	2.45304e-44	NC_006069.1	2357452	2357979	+	360	YALI0_C16731g	GO:0005739;GO:0033617	K18178	-	YALI0C16731p [Yarrowia lipolytica CLIB122]	YALI0_C16731g	YALI0C16731g	2909295
gene5017	673.518	945.615	401.421	0.424508	-1.23614	8.35936e-45	3.37583e-44	NC_006071.1	2504896	2505567	+	672	YALI0_E21065g	-	-	-	YALI0E21065p [Yarrowia lipolytica CLIB122]	YALI0_E21065g	YALI0E21065g	2911851
gene1595	823.371	1134.36	512.386	0.451697	-1.14657	8.90463e-45	3.59152e-44	NC_006068.1	2287629	2289143	-	1515	YALI0_B17468g	-	-	-	YALI0B17468p [Yarrowia lipolytica CLIB122]	YALI0_B17468g	YALI0B17468g	2907514
gene1483	974.509	1323.3	625.723	0.472852	-1.08054	9.95347e-45	4.01202e-44	NC_006068.1	1995078	1997168	-	2091	YALI0_B15015g	GO:0005515;GO:0005634;GO:0006334;GO:0033186;GO:0042393	K10751	-	YALI0B15015p [Yarrowia lipolytica CLIB122]	YALI0_B15015g	YALI0B15015g	2907342
gene2659	444.288	652.328	236.248	0.362161	-1.4653	1.46324e-44	5.8832e-44	NC_006069.1	2568176	2568788	-	546	YALI0_C18711g	GO:0005783;GO:0005789;GO:0016020;GO:0016021	-	-	YALI0C18711p [Yarrowia lipolytica CLIB122]	YALI0_C18711g	YALI0C18711g	2909961
gene981	521.291	883.624	158.959	0.179894	-2.47478	2.38824e-44	9.55444e-44	NC_006068.1	473239	474204	-	966	YALI0_B03278g	-	-	-	YALI0B03278p [Yarrowia lipolytica CLIB122]	YALI0_B03278g	YALI0B03278g	2907216
gene1236	170.603	285.453	55.7521	0.195311	-2.35615	6.04361e-44	2.40433e-43	NC_006068.1	1286019	1288169	+	2151	YALI0_B09427g	GO:0016787	-	-	YALI0B09427p [Yarrowia lipolytica CLIB122]	YALI0_B09427g	YALI0B09427g	2907285
gene396	859.451	1175.29	543.61	0.462532	-1.11238	1.64742e-43	6.52157e-43	NC_006067.1	1013526	1014746	-	1221	YALI0_A10032g	GO:0004326;GO:0005524;GO:0005737;GO:0005739;GO:0005829;GO:0006761;GO:0008841;GO:0009058;GO:0009396;GO:0016874;GO:0046901	K20457	[EC:6.3.2.12]	YALI0A10032p [Yarrowia lipolytica CLIB122]	YALI0_A10032g	YALI0A10032g	2905762
gene233	1135.04	1516.28	753.799	0.497136	-1.00829	2.6111e-43	1.03174e-42	NC_006067.1	595239	596096	+	858	YALI0_A05995g	GO:0000176;GO:0000178;GO:0003723;GO:0005737;GO:0006396	K07573	-	YALI0A05995p [Yarrowia lipolytica CLIB122]	YALI0_A05995g	YALI0A05995g	2906218
gene394	934.418	1267.83	601.002	0.474039	-1.07692	2.72685e-43	1.07681e-42	NC_006067.1	1009201	1011531	+	2331	YALI0_A09988g	GO:0004222;GO:0005739;GO:0005759;GO:0006508;GO:0006518;GO:0006627;GO:0008233;GO:0008237;GO:0016787;GO:0046872	K01410	[EC:3.4.24.59]	YALI0A09988p [Yarrowia lipolytica CLIB122]	YALI0_A09988g	YALI0A09988g	2905768
gene5357	212.303	342.56	82.0465	0.23951	-2.06184	3.07935e-43	1.21452e-42	NC_006071.1	3391654	3392451	+	798	YALI0_E28600g	GO:0000213;GO:0000214;GO:0000379;GO:0003676;GO:0004518;GO:0006388;GO:0008033;GO:0016829;GO:0090305;GO:0090501;GO:0090502	K15323	[EC:4.6.1.16]	YALI0E28600p [Yarrowia lipolytica CLIB122]	YALI0_E28600g	YALI0E28600g	2911622
gene6859	1042.11	1400.26	683.958	0.488452	-1.03371	5.70474e-43	2.24172e-42	NC_006072.1	3421133	3422542	+	1410	YALI0_F26807g	GO:0000166;GO:0004672;GO:0005524;GO:0005739;GO:0005759;GO:0006468;GO:0016301;GO:0016310;GO:0016740	-	-	YALI0F26807p [Yarrowia lipolytica CLIB122]	YALI0_F26807g	YALI0F26807g	2907667
gene4372	2549.1	3438.51	1659.69	0.482679	-1.05086	9.79166e-43	3.83831e-42	NC_006071.1	718217	718639	-	423	YALI0_E06237g	GO:0005739;GO:0005743;GO:0008565;GO:0015031;GO:0016020;GO:0042719;GO:0045039;GO:0046872	K17778	-	YALI0E06237p [Yarrowia lipolytica CLIB122]	YALI0_E06237g	YALI0E06237g	2912389
gene6049	667.86	932.304	403.417	0.432709	-1.20853	1.16361e-42	4.55576e-42	NC_006072.1	1190565	1191134	+	570	YALI0_F08525g	-	-	-	YALI0F08525p [Yarrowia lipolytica CLIB122]	YALI0_F08525g	YALI0F08525g	2908494
gene2947	829.579	1134.34	524.814	0.462659	-1.11198	1.70285e-42	6.65887e-42	NC_006070.1	75415	76224	+	810	YALI0_D00715g	GO:0005739;GO:0005743;GO:0005744;GO:0015031;GO:0016020;GO:0016021;GO:0030150	K17796	-	YALI0D00715p [Yarrowia lipolytica CLIB122]	YALI0_D00715g	YALI0D00715g	2910402
gene2423	964.237	1301.05	627.427	0.482248	-1.05215	1.9884e-42	7.766e-42	NC_006069.1	1778918	1779658	+	741	YALI0_C12881g	GO:0006364;GO:0030687	-	-	YALI0C12881p [Yarrowia lipolytica CLIB122]	YALI0_C12881g	YALI0C12881g	2909517
gene2510	495.86	713.525	278.195	0.389888	-1.35887	2.38721e-42	9.30664e-42	NC_006069.1	2109395	2110933	+	1539	YALI0_C15136g	-	-	-	YALI0C15136p [Yarrowia lipolytica CLIB122]	YALI0_C15136g	YALI0C15136g	2909351
gene2283	231.305	367.21	95.4	0.259796	-1.94455	2.64273e-42	1.02966e-41	NC_006069.1	1305576	1306559	+	984	YALI0_C09570g	GO:0003824;GO:0004034;GO:0005975;GO:0006006;GO:0016853;GO:0030246;GO:0033499	K01785	[EC:5.1.3.3]	YALI0C09570p [Yarrowia lipolytica CLIB122]	YALI0_C09570g	YALI0C09570g	2909771
gene1361	1091.07	1457.91	724.233	0.496762	-1.00937	2.7192e-42	1.05816e-41	NC_006068.1	1633688	1636174	+	2487	YALI0_B12276g	GO:0000381;GO:0003676;GO:0003723;GO:0005634;GO:0005730;GO:0006364;GO:0016607;GO:0045292	K14787	-	YALI0B12276p [Yarrowia lipolytica CLIB122]	YALI0_B12276g	YALI0B12276g	2907128
gene1976	307.106	468.635	145.577	0.310641	-1.68668	3.24428e-42	1.26097e-41	NC_006069.1	361617	362120	-	504	YALI0_C02607g	GO:0016020;GO:0016021	-	-	YALI0C02607p [Yarrowia lipolytica CLIB122]	YALI0_C02607g	YALI0C02607g	2909091
gene3784	188.621	308.413	68.8298	0.223174	-2.16376	3.62946e-42	1.40812e-41	NC_006070.1	2523747	2524844	+	1098	YALI0_D20020g	GO:0070131	-	-	YALI0D20020p [Yarrowia lipolytica CLIB122]	YALI0_D20020g	YALI0D20020g	2911194
gene2870	472.38	691.596	253.163	0.366056	-1.44986	5.29812e-42	2.04931e-41	NC_006069.1	3132041	3134275	-	2235	YALI0_C23386g	GO:0002098;GO:0005515;GO:0005634;GO:0006357;GO:0008023;GO:0033588	K11374	-	YALI0C23386p [Yarrowia lipolytica CLIB122]	YALI0_C23386g	YALI0C23386g	2909609
gene3238	502.266	720.713	283.818	0.393801	-1.34446	5.6358e-42	2.17861e-41	NC_006070.1	952120	953247	-	1128	YALI0_D07458g	-	-	-	YALI0D07458p [Yarrowia lipolytica CLIB122]	YALI0_D07458g	YALI0D07458g	2910895
gene2422	251.518	393.996	109.04	0.276753	-1.85333	7.35976e-42	2.8399e-41	NC_006069.1	1775900	1778221	-	2322	YALI0_C12859g	GO:0000166;GO:0003774;GO:0003777;GO:0005524;GO:0005634;GO:0005871;GO:0005874;GO:0007018;GO:0008017;GO:0016887;GO:0072686;GO:0090307	K10405	-	YALI0C12859p [Yarrowia lipolytica CLIB122]	YALI0_C12859g	YALI0C12859g	2909516
gene6774	677.203	941.631	412.775	0.438362	-1.18981	8.782e-42	3.38463e-41	NC_006072.1	3228501	3229514	-	1014	YALI0_F24937g	GO:0003824;GO:0016491;GO:0016616;GO:0050662;GO:0055114	-	-	YALI0F24937p [Yarrowia lipolytica CLIB122]	YALI0_F24937g	YALI0F24937g	2907995
gene1890	373.173	553.693	192.653	0.347942	-1.52308	1.3616e-41	5.23195e-41	NC_006069.1	75771	76392	-	291	YALI0_C00550g	-	-	-	YALI0C00550p [Yarrowia lipolytica CLIB122]	YALI0_C00550g	YALI0C00550g	7009429
gene6822	419.587	613.042	226.132	0.368868	-1.43882	3.01415e-41	1.14993e-40	NC_006072.1	3343425	3344456	+	1032	YALI0_F26037g	GO:0000287;GO:0003986;GO:0009132;GO:0015938;GO:0016787;GO:0016818;GO:0030145	-	-	YALI0F26037p [Yarrowia lipolytica CLIB122]	YALI0_F26037g	YALI0F26037g	2908345
gene3740	848.829	1152.59	545.063	0.472901	-1.08039	5.92146e-41	2.24707e-40	NC_006070.1	2401810	2402721	+	912	YALI0_D18986g	GO:0006364;GO:0030515	K14770	-	YALI0D18986p [Yarrowia lipolytica CLIB122]	YALI0_D18986g	YALI0D18986g	2911147
gene2631	115.637	202.848	28.4253	0.140131	-2.83516	1.10376e-40	4.17126e-40	NC_006069.1	2495282	2496472	+	1191	YALI0_C18095g	GO:0000166;GO:0002098;GO:0002143;GO:0003824;GO:0004792;GO:0005524;GO:0005737;GO:0005829;GO:0008033;GO:0008152;GO:0008641;GO:0016740;GO:0016779;GO:0016783;GO:0018192;GO:0032447;GO:0034227;GO:0042292;GO:0046872	K11996	-	YALI0C18095p [Yarrowia lipolytica CLIB122]	YALI0_C18095g	YALI0C18095g	2909989
gene2655	851.412	1153.99	548.833	0.475596	-1.07219	1.9402e-40	7.3065e-40	NC_006069.1	2552662	2555451	+	2790	YALI0_C18623g	GO:0005737;GO:0005905;GO:0006886;GO:0006897;GO:0015031;GO:0016020;GO:0016192;GO:0030117;GO:0030122;GO:0030131;GO:0035615;GO:0072583	K11824	-	YALI0C18623p [Yarrowia lipolytica CLIB122]	YALI0_C18623g	YALI0C18623g	2909958
gene2229	224.595	355.367	93.8241	0.26402	-1.92128	2.02986e-40	7.63967e-40	NC_006069.1	1146546	1148330	-	1785	YALI0_C08437g	-	-	-	YALI0C08437p [Yarrowia lipolytica CLIB122]	YALI0_C08437g	YALI0C08437g	2909326
gene6718	904.816	1219.24	590.387	0.484224	-1.04625	2.93557e-40	1.10355e-39	NC_006072.1	3106250	3107374	-	1125	YALI0_F23661g	GO:0003824;GO:0003959;GO:0010181;GO:0016491;GO:0055114	-	-	YALI0F23661p [Yarrowia lipolytica CLIB122]	YALI0_F23661g	YALI0F23661g	2908762
gene2466	624.094	870.288	377.901	0.434225	-1.20348	2.98417e-40	1.12116e-39	NC_006069.1	1956747	1957865	+	1119	YALI0_C14036g	GO:0005739;GO:0006644;GO:0007007;GO:0016746;GO:0035965	K13511	[EC:2.3.1.-]	YALI0C14036p [Yarrowia lipolytica CLIB122]	YALI0_C14036g	YALI0C14036g	2909726
gene2427	569.242	799.934	338.551	0.423224	-1.24051	6.66693e-40	2.49602e-39	NC_006069.1	1796379	1797296	+	918	YALI0_C13002g	-	-	-	YALI0C13002p [Yarrowia lipolytica CLIB122]	YALI0_C13002g	YALI0C13002g	2909522
gene1422	337.809	503.704	171.915	0.341301	-1.55088	1.26709e-39	4.71903e-39	NC_006068.1	1843206	1844774	+	1569	YALI0_B13706g	GO:0000244;GO:0000398;GO:0005687;GO:0046540	K12844	-	YALI0B13706p [Yarrowia lipolytica CLIB122]	YALI0_B13706g	YALI0B13706g	2907305
gene3650	755.265	1031.29	479.24	0.4647	-1.10563	1.33861e-39	4.98251e-39	NC_006070.1	2092820	2093536	+	717	YALI0_D16940g	GO:0005634;GO:0005737	-	-	YALI0D16940p [Yarrowia lipolytica CLIB122]	YALI0_D16940g	YALI0D16940g	2910216
gene6917	425.039	615.946	234.132	0.380117	-1.39548	1.89398e-39	7.04562e-39	NC_006072.1	3578472	3579233	+	762	YALI0_F28105g	GO:0016706;GO:0055114	K10277	[EC:1.14.11.27]	YALI0F28105p [Yarrowia lipolytica CLIB122]	YALI0_F28105g	YALI0F28105g	2908105
gene5542	460.888	661.517	260.259	0.393427	-1.34583	1.99462e-39	7.41568e-39	NC_006071.1	3848860	3850221	-	1362	YALI0_E32439g	GO:0005515;GO:0005737;GO:0019005;GO:0031146	K10295	-	YALI0E32439p [Yarrowia lipolytica CLIB122]	YALI0_E32439g	YALI0E32439g	2911548
gene2808	109.959	193.273	26.6455	0.137864	-2.85868	2.245e-39	8.32725e-39	NC_006069.1	2946367	2948340	-	1974	YALI0_C22044g	-	-	-	YALI0C22044p [Yarrowia lipolytica CLIB122]	YALI0_C22044g	YALI0C22044g	2909818
gene6257	726.643	995.221	458.065	0.460265	-1.11946	2.37592e-39	8.80777e-39	NC_006072.1	1795687	1796127	+	333	YALI0_F13354g	GO:0000993;GO:0003727;GO:0005634;GO:0006325;GO:0006355;GO:0008270;GO:0032044;GO:0032786	K15171	-	YALI0F13354p [Yarrowia lipolytica CLIB122]	YALI0_F13354g	YALI0F13354g	7009621
gene6463	944.111	1264.14	624.085	0.493685	-1.01834	2.46869e-39	9.14642e-39	NC_006072.1	2388821	2390266	+	1446	YALI0_F17908g	-	-	-	YALI0F17908p [Yarrowia lipolytica CLIB122]	YALI0_F17908g	YALI0F17908g	2908363
gene3143	919.344	1233.57	605.113	0.490536	-1.02757	2.50018e-39	9.25773e-39	NC_006070.1	686919	688112	-	1194	YALI0_D05335g	GO:0005737;GO:0048040;GO:0070403	K08678	[EC:4.1.1.35]	YALI0D05335p [Yarrowia lipolytica CLIB122]	YALI0_D05335g	YALI0D05335g	2910982
gene7062	423.536	613.357	233.714	0.381041	-1.39198	3.28262e-39	1.2127e-38	NC_006072.1	3918288	3918638	+	255	YALI0_F31548g	-	K17968	-	YALI0F31548p [Yarrowia lipolytica CLIB122]	YALI0_F31548g	YALI0F31548g	7009651
gene3722	391.74	572.373	211.107	0.368828	-1.43898	4.23013e-39	1.55915e-38	NC_006070.1	2327593	2328510	-	918	YALI0_D18590g	GO:0001401	K17714	-	YALI0D18590p [Yarrowia lipolytica CLIB122]	YALI0_D18590g	YALI0D18590g	2911124
gene1273	188.814	328.442	49.1849	0.149752	-2.73935	7.53693e-39	2.76685e-38	NC_006068.1	1410009	1411283	-	1275	YALI0_B10263g	GO:0000049;GO:0002098;GO:0002143;GO:0005737;GO:0005829;GO:0008033;GO:0016779;GO:0016783;GO:0032447;GO:0034227	K14169	-	YALI0B10263p [Yarrowia lipolytica CLIB122]	YALI0_B10263g	YALI0B10263g	2906688
gene3085	947.269	1265.84	628.694	0.49666	-1.00967	8.17249e-39	2.99845e-38	NC_006070.1	505968	506870	-	903	YALI0_D04048g	GO:0005515;GO:0005884;GO:0005886;GO:0016020;GO:0016021;GO:0030427;GO:0030833;GO:0030864;GO:0051015	K11246	-	YALI0D04048p [Yarrowia lipolytica CLIB122]	YALI0_D04048g	YALI0D04048g	2910598
gene3975	1716	2384.14	1047.85	0.439507	-1.18604	1.49952e-38	5.48911e-38	NC_006070.1	3255830	3258610	-	2781	YALI0_D24497g	GO:0000166;GO:0003676;GO:0003723;GO:0003724;GO:0004386;GO:0005524;GO:0005634;GO:0005730;GO:0006364;GO:0016787;GO:0042254	K14808	[EC:3.6.4.13]	YALI0D24497p [Yarrowia lipolytica CLIB122]	YALI0_D24497g	YALI0D24497g	2910446
gene919	99.904	177.701	22.1067	0.124404	-3.0069	1.54305e-38	5.64523e-38	NC_006068.1	269823	271469	+	1647	YALI0_B01771g	GO:0004620;GO:0004622;GO:0004623;GO:0005737;GO:0006629;GO:0009395;GO:0016042;GO:0016787;GO:0046475	-	-	YALI0B01771p [Yarrowia lipolytica CLIB122]	YALI0_B01771g	YALI0B01771g	7009393
gene1043	236.966	391.437	82.4942	0.210747	-2.24642	2.18205e-38	7.9694e-38	NC_006068.1	644658	645131	-	474	YALI0_B04752g	GO:0000172;GO:0004526;GO:0004540;GO:0005655;GO:0006364;GO:0008033;GO:0016070;GO:0016787;GO:0090501;GO:0090502	K03537	[EC:3.1.26.5]	YALI0B04752p [Yarrowia lipolytica CLIB122]	YALI0_B04752g	YALI0B04752g	2906935
gene3691	325.287	485.07	165.504	0.341195	-1.55133	2.23876e-38	8.16721e-38	NC_006070.1	2207968	2209437	+	1470	YALI0_D17842g	GO:0004623;GO:0005743;GO:0035965;GO:0052689;GO:0055088	K13535	[EC:3.1.1.-]	YALI0D17842p [Yarrowia lipolytica CLIB122]	YALI0_D17842g	YALI0D17842g	2911317
gene2492	324.774	538.656	110.891	0.205866	-2.28022	3.78552e-38	1.3763e-37	NC_006069.1	2018367	2019020	+	654	YALI0_C14696g	-	-	-	YALI0C14696p [Yarrowia lipolytica CLIB122]	YALI0_C14696g	YALI0C14696g	2909737
gene1571	787.725	1066.3	509.149	0.477491	-1.06645	4.24078e-38	1.54007e-37	NC_006068.1	2228530	2229075	+	546	YALI0_B16962g	-	-	-	YALI0B16962p [Yarrowia lipolytica CLIB122]	YALI0_B16962g	YALI0B16962g	2907067
gene2054	534.922	751.283	318.561	0.424022	-1.23779	5.85085e-38	2.11759e-37	NC_006069.1	582586	583608	+	1023	YALI0_C04367g	GO:0000439;GO:0005634;GO:0005675;GO:0006281;GO:0006289;GO:0006355;GO:0006974;GO:0008094;GO:0008353;GO:0046872;GO:0070816	K03143	-	YALI0C04367p [Yarrowia lipolytica CLIB122]	YALI0_C04367g	YALI0C04367g	2909399
gene400	312.096	466.719	157.473	0.337403	-1.56745	8.7096e-38	3.14516e-37	NC_006067.1	1023545	1024573	-	1029	YALI0_A10142g	-	-	-	YALI0A10142p [Yarrowia lipolytica CLIB122]	YALI0_A10142g	YALI0A10142g	2906472
gene6106	188.96	357.546	20.3732	0.0569805	-4.13339	1.24485e-37	4.47517e-37	NC_006072.1	1345131	1346213	+	1083	YALI0_F09878g	-	-	-	YALI0F09878p [Yarrowia lipolytica CLIB122]	YALI0_F09878g	YALI0F09878g	2908981
gene6296	2048.1	2916.03	1180.17	0.404718	-1.30501	1.37078e-37	4.92513e-37	NC_006072.1	1915539	1916366	+	828	YALI0_F14245g	GO:0003676;GO:0003723	K14838	-	YALI0F14245p [Yarrowia lipolytica CLIB122]	YALI0_F14245g	YALI0F14245g	2908031
gene5222	169.315	279.81	58.8203	0.210215	-2.25006	2.05445e-37	7.35681e-37	NC_006071.1	3040677	3041228	+	552	YALI0_E25630g	-	-	-	YALI0E25630p [Yarrowia lipolytica CLIB122]	YALI0_E25630g	YALI0E25630g	2912724
gene3848	1366	1974.45	757.557	0.38368	-1.38202	2.14218e-37	7.66669e-37	NC_006070.1	2729521	2730525	-	1005	YALI0_D21582g	GO:0005886;GO:0016020;GO:0016021	K07112	-	YALI0D21582p [Yarrowia lipolytica CLIB122]	YALI0_D21582g	YALI0D21582g	2910164
gene3919	1187.3	1587.33	787.264	0.495967	-1.01168	3.98892e-37	1.42284e-36	NC_006070.1	3017625	3022001	-	4377	YALI0_D23265g	GO:0000166;GO:0005524;GO:0005623;GO:0006812;GO:0006874;GO:0016020;GO:0016021;GO:0016787;GO:0016887;GO:0046872	K13526	[EC:7.2.2.-]	YALI0D23265p [Yarrowia lipolytica CLIB122]	YALI0_D23265g	YALI0D23265g	2911051
gene269	652.225	894.687	409.764	0.457997	-1.12659	5.96156e-37	2.11824e-36	NC_006067.1	671158	672303	-	1146	YALI0_A06886g	-	-	-	YALI0A06886p [Yarrowia lipolytica CLIB122]	YALI0_A06886g	YALI0A06886g	2906595
gene6630	867.73	1160.28	575.174	0.495718	-1.01241	6.16619e-37	2.18852e-36	NC_006072.1	2856712	2859684	-	2973	YALI0_F21615g	GO:0003824;GO:0004222;GO:0005739;GO:0005759;GO:0006508;GO:0008233;GO:0008237;GO:0016787;GO:0046872	K06972	[EC:3.4.24.-]	YALI0F21615p [Yarrowia lipolytica CLIB122]	YALI0_F21615g	YALI0F21615g	2907820
gene4224	482.305	681.996	282.614	0.414392	-1.27093	6.56434e-37	2.32854e-36	NC_006071.1	318087	319262	+	1176	YALI0_E02904g	GO:0000166;GO:0004484;GO:0005525;GO:0005634;GO:0006370;GO:0006397;GO:0016740;GO:0016779;GO:0031533	K00987	[EC:2.7.7.50]	YALI0E02904p [Yarrowia lipolytica CLIB122]	YALI0_E02904g	YALI0E02904g	2912122
gene2489	809.219	1373.34	245.097	0.178468	-2.48627	1.97627e-36	6.96797e-36	NC_006069.1	2011860	2012549	+	690	YALI0_C14630g	-	-	-	YALI0C14630p [Yarrowia lipolytica CLIB122]	YALI0_C14630g	YALI0C14630g	2909734
gene6404	230.7	357.156	104.244	0.291873	-1.77659	3.01751e-36	1.06043e-35	NC_006072.1	2226694	2227416	-	723	YALI0_F16643g	GO:0003697;GO:0004521;GO:0005634;GO:0005737;GO:0043565;GO:0090502	-	-	YALI0F16643p [Yarrowia lipolytica CLIB122]	YALI0_F16643g	YALI0F16643g	2908909
gene1988	428.825	670.315	187.336	0.279474	-1.83921	3.40444e-36	1.19575e-35	NC_006069.1	394171	394548	-	378	YALI0_C02893g	-	-	-	YALI0C02893p [Yarrowia lipolytica CLIB122]	YALI0_C02893g	YALI0C02893g	2909052
gene5493	162.455	264.722	60.1893	0.227368	-2.1369	3.46755e-36	1.21725e-35	NC_006071.1	3716668	3717651	-	984	YALI0_E31515g	GO:0098599;GO:0098734	K01046	[EC:3.1.1.3]	YALI0E31515p [Yarrowia lipolytica CLIB122]	YALI0_E31515g	YALI0E31515g	2911553
gene2397	488.781	688.258	289.305	0.420343	-1.25036	3.71475e-36	1.3026e-35	NC_006069.1	1697737	1699011	+	1275	YALI0_C12254g	GO:0005886;GO:0006812;GO:0006876;GO:0006879;GO:0006882;GO:0008324;GO:0015086;GO:0015093;GO:0015341;GO:0016020;GO:0016021;GO:0034220;GO:0034755;GO:0055085;GO:0070574;GO:0071577;GO:0072511;GO:0098655	-	-	YALI0C12254p [Yarrowia lipolytica CLIB122]	YALI0_C12254g	YALI0C12254g	2910121
gene6591	966.158	1290.6	641.717	0.497224	-1.00803	7.36359e-36	2.56945e-35	NC_006072.1	2763478	2769876	+	6321	YALI0_F20724g	GO:0000388;GO:0000398;GO:0003676;GO:0005524;GO:0005634;GO:0005681;GO:0005682;GO:0046540;GO:0071013;GO:0071014	K12854	[EC:3.6.4.13]	YALI0F20724p [Yarrowia lipolytica CLIB122]	YALI0_F20724g	YALI0F20724g	2908575
gene4266	320.807	474.202	167.413	0.353041	-1.50209	7.74566e-36	2.69836e-35	NC_006071.1	435333	436766	+	1434	YALI0_E03894g	GO:0004057;GO:0005737;GO:0016598;GO:0016740;GO:0016746	K00685	[EC:2.3.2.8]	YALI0E03894p [Yarrowia lipolytica CLIB122]	YALI0_E03894g	YALI0E03894g	2912170
gene4487	605.542	832.683	378.401	0.454436	-1.13785	1.15145e-35	3.9918e-35	NC_006071.1	1073721	1076039	+	2319	YALI0_E09015g	GO:0005247;GO:0005768;GO:0005769;GO:0005794;GO:0005886;GO:0005887;GO:0006811;GO:0006821;GO:0015299;GO:0016020;GO:0016021;GO:0031404;GO:0055085;GO:1902476;GO:1902600	K05012	-	YALI0E09015p [Yarrowia lipolytica CLIB122]	YALI0_E09015g	YALI0E09015g	2912515
gene5600	365.509	531.045	199.973	0.376566	-1.40903	1.25123e-35	4.33539e-35	NC_006071.1	3999337	4000839	+	1503	YALI0_E33671g	GO:0000166;GO:0005524;GO:0016887	-	-	YALI0E33671p [Yarrowia lipolytica CLIB122]	YALI0_E33671g	YALI0E33671g	2912465
gene321	456.001	645.83	266.172	0.412139	-1.2788	1.27369e-35	4.41082e-35	NC_006067.1	792184	793175	-	375	YALI0_A08151g	GO:0001054;GO:0003676;GO:0003899;GO:0005634;GO:0005730;GO:0005736;GO:0006351;GO:0006363;GO:0006379;GO:0008270;GO:0046872	K03000	-	YALI0A08151p [Yarrowia lipolytica CLIB122]	YALI0_A08151g	YALI0A08151g	2906107
gene3769	690.567	937.635	443.498	0.472997	-1.0801	1.37671e-35	4.76501e-35	NC_006070.1	2488134	2488724	+	591	YALI0_D19624g	GO:0003729;GO:0005634;GO:0005730;GO:0008298;GO:0030687;GO:0042254;GO:0042273;GO:0051028	K14817	-	YALI0D19624p [Yarrowia lipolytica CLIB122]	YALI0_D19624g	YALI0D19624g	2911179
gene778	492.416	689.627	295.205	0.428064	-1.2241	4.84139e-35	1.66669e-34	NC_006067.1	2137280	2138146	-	867	YALI0_A19800g	GO:0005515	-	-	YALI0A19800p [Yarrowia lipolytica CLIB122]	YALI0_A19800g	YALI0A19800g	2905969
gene5509	284.402	425.382	143.423	0.337163	-1.56848	5.08587e-35	1.74992e-34	NC_006071.1	3780801	3781985	+	1185	YALI0_E31793g	-	-	-	YALI0E31793p [Yarrowia lipolytica CLIB122]	YALI0_E31793g	YALI0E31793g	2912066
gene1271	443.481	628.096	258.866	0.412144	-1.27878	5.69084e-35	1.95703e-34	NC_006068.1	1400449	1402620	-	2172	YALI0_B10219g	GO:0000493;GO:0001522;GO:0003723;GO:0005634;GO:0005732;GO:0042254	K14763	-	YALI0B10219p [Yarrowia lipolytica CLIB122]	YALI0_B10219g	YALI0B10219g	2906809
gene3778	588.112	808.648	367.576	0.454556	-1.13747	6.0255e-35	2.071e-34	NC_006070.1	2514558	2515592	-	1035	YALI0_D19888g	GO:0000166;GO:0003924;GO:0005525;GO:0016787	K06883	-	YALI0D19888p [Yarrowia lipolytica CLIB122]	YALI0_D19888g	YALI0D19888g	2911188
gene4179	543.488	753.245	333.731	0.443058	-1.17443	6.74519e-35	2.31712e-34	NC_006071.1	207077	207811	-	735	YALI0_E01936g	GO:0005634;GO:0005730;GO:0006364;GO:0032040	K14769	-	YALI0E01936p [Yarrowia lipolytica CLIB122]	YALI0_E01936g	YALI0E01936g	2912073
gene1413	202.779	316.429	89.1285	0.28167	-1.82792	4.54998e-34	1.54238e-33	NC_006068.1	1818072	1818920	-	849	YALI0_B13486g	GO:0005634;GO:0005737;GO:0007017;GO:0007623	-	-	YALI0B13486p [Yarrowia lipolytica CLIB122]	YALI0_B13486g	YALI0B13486g	2907439
gene6445	521.608	722.938	320.278	0.443022	-1.17455	7.22951e-34	2.44167e-33	NC_006072.1	2341685	2341987	-	303	YALI0_F17534g	GO:0001193;GO:0003676;GO:0003899;GO:0005634;GO:0005665;GO:0005730;GO:0006283;GO:0006351;GO:0006367;GO:0006379;GO:0008270;GO:0046872	K03017	-	YALI0F17534p [Yarrowia lipolytica CLIB122]	YALI0_F17534g	YALI0F17534g	2908276
gene2732	566.423	778.244	354.602	0.455644	-1.13402	1.06224e-33	3.57255e-33	NC_006069.1	2750317	2751132	+	816	YALI0_C20317g	GO:0000166;GO:0003924;GO:0005525;GO:0016787	K06883	-	YALI0C20317p [Yarrowia lipolytica CLIB122]	YALI0_C20317g	YALI0C20317g	2909877
gene5614	240.385	365.459	115.312	0.315527	-1.66416	1.07718e-33	3.62087e-33	NC_006071.1	4038251	4039081	-	831	YALI0_E33979g	-	-	-	YALI0E33979p [Yarrowia lipolytica CLIB122]	YALI0_E33979g	YALI0E33979g	2911658
gene4769	454.399	638.592	270.205	0.423126	-1.24084	1.15977e-33	3.89648e-33	NC_006071.1	1828327	1829004	-	678	YALI0_E15356g	GO:0003676;GO:0003723	K12831	-	YALI0E15356p [Yarrowia lipolytica CLIB122]	YALI0_E15356g	YALI0E15356g	2911998
gene5305	319.821	467.668	171.975	0.367729	-1.44328	2.21718e-33	7.41408e-33	NC_006071.1	3244765	3245364	-	600	YALI0_E27412g	GO:0004045;GO:0005739;GO:0005829;GO:0016020;GO:0016021	K04794	[EC:3.1.1.29]	YALI0E27412p [Yarrowia lipolytica CLIB122]	YALI0_E27412g	YALI0E27412g	2912250
gene6089	603.37	822.244	384.497	0.467619	-1.09659	2.61645e-33	8.74466e-33	NC_006072.1	1304472	1305218	+	747	YALI0_F09471g	GO:0000166;GO:0000408;GO:0000781;GO:0004672;GO:0004674;GO:0005524;GO:0005634;GO:0005694;GO:0005737;GO:0006468;GO:0008033;GO:0016301;GO:0016310;GO:0016740;GO:0016787;GO:0070525	K08851	[EC:2.7.11.1]	YALI0F09471p [Yarrowia lipolytica CLIB122]	YALI0_F09471g	YALI0F09471g	2908942
gene5711	484.279	674.045	294.514	0.436934	-1.19451	4.7539e-33	1.58225e-32	NC_006072.1	179832	180515	+	684	YALI0_F01100g	-	-	-	YALI0F01100p [Yarrowia lipolytica CLIB122]	YALI0_F01100g	YALI0F01100g	2908211
gene1869	895.154	1351.16	439.152	0.32502	-1.6214	6.49065e-33	2.15582e-32	NC_006068.1	3059312	3059677	-	366	YALI0_B23496g	GO:0016020;GO:0016021	-	-	YALI0B23496p [Yarrowia lipolytica CLIB122]	YALI0_B23496g	YALI0B23496g	2906732
gene3382	677.506	911.831	443.181	0.486035	-1.04087	7.02176e-33	2.32982e-32	NC_006070.1	1316868	1319828	-	2961	YALI0_D10549g	GO:0000030;GO:0004169;GO:0005789;GO:0006493;GO:0016020;GO:0016021;GO:0031505;GO:0035269;GO:0097582	-	-	YALI0D10549p [Yarrowia lipolytica CLIB122]	YALI0_D10549g	YALI0D10549g	2910429
gene2029	262.607	392.986	132.228	0.336471	-1.57144	8.84424e-33	2.92997e-32	NC_006069.1	500189	501192	+	873	YALI0_C03784g	GO:0000171;GO:0000172;GO:0003723;GO:0004526;GO:0004540;GO:0005634;GO:0006364;GO:0006396;GO:0008033;GO:0030677;GO:0033204;GO:0090501;GO:0090502	K03538	[EC:3.1.26.5]	YALI0C03784p [Yarrowia lipolytica CLIB122]	YALI0_C03784g	YALI0C03784g	2909917
gene5283	1698.99	2407.57	990.407	0.411373	-1.28148	9.76498e-33	3.22501e-32	NC_006071.1	3195606	3196952	+	1347	YALI0_E26961g	GO:0000166;GO:0000226;GO:0000278;GO:0003924;GO:0005200;GO:0005525;GO:0005737;GO:0005856;GO:0005874;GO:0007017	-	-	YALI0E26961p [Yarrowia lipolytica CLIB122]	YALI0_E26961g	YALI0E26961g	2912769
gene3781	407.296	576.94	237.652	0.411918	-1.27957	1.00835e-32	3.32679e-32	NC_006070.1	2519286	2519816	-	531	YALI0_D19954g	GO:0005634	K14860	-	YALI0D19954p [Yarrowia lipolytica CLIB122]	YALI0_D19954g	YALI0D19954g	2911191
gene6007	445.651	648.578	242.724	0.37424	-1.41797	1.16769e-32	3.84851e-32	NC_006072.1	1093737	1095587	+	1851	YALI0_F07601g	GO:0003779;GO:0003786;GO:0005509;GO:0005515;GO:0005826;GO:0032432;GO:0051017;GO:1902405;GO:1903478	-	-	YALI0F07601p [Yarrowia lipolytica CLIB122]	YALI0_F07601g	YALI0F07601g	2908402
gene6599	636.885	860.698	413.071	0.479926	-1.05912	1.60037e-32	5.26915e-32	NC_006072.1	2782081	2783197	+	1065	YALI0_F20900g	GO:0008677;GO:0015940;GO:0016491;GO:0033317;GO:0050661;GO:0055114	K00077	[EC:1.1.1.169]	YALI0F20900p [Yarrowia lipolytica CLIB122]	YALI0_F20900g	YALI0F20900g	2908936
gene3233	334.62	484.285	184.954	0.381912	-1.38869	2.17672e-32	7.14841e-32	NC_006070.1	939277	940212	-	936	YALI0_D07348g	GO:0003729;GO:0005515;GO:0005634	K13108	-	YALI0D07348p [Yarrowia lipolytica CLIB122]	YALI0_D07348g	YALI0D07348g	2910890
gene5702	536.835	737.238	336.432	0.456341	-1.13182	2.28943e-32	7.50703e-32	NC_006072.1	142565	143101	-	537	YALI0_F00902g	GO:0005634;GO:0005730	-	-	YALI0F00902p [Yarrowia lipolytica CLIB122]	YALI0_F00902g	YALI0F00902g	2908223
gene1896	148.233	240.332	56.1346	0.233571	-2.09807	2.35114e-32	7.70545e-32	NC_006069.1	88828	90642	-	1815	YALI0_C00671g	GO:0000278;GO:0003688;GO:0005524;GO:0005634;GO:0033314	K02213	-	YALI0C00671p [Yarrowia lipolytica CLIB122]	YALI0_C00671g	YALI0C00671g	2909183
gene1309	462.041	644.329	279.753	0.434177	-1.20365	2.51243e-32	8.22146e-32	NC_006068.1	1497803	1500058	+	2256	YALI0_B11066g	GO:0003676;GO:0005524	-	-	YALI0B11066p [Yarrowia lipolytica CLIB122]	YALI0_B11066g	YALI0B11066g	2906922
gene85	206.391	318.199	94.5843	0.297249	-1.75025	3.51971e-32	1.14883e-31	NC_006067.1	268401	268852	+	396	YALI0_A02156g	-	-	-	YALI0A02156p [Yarrowia lipolytica CLIB122]	YALI0_A02156g	YALI0A02156g	2906585
gene2662	168.102	267.031	69.1721	0.259041	-1.94875	3.89851e-32	1.27182e-31	NC_006069.1	2572263	2572628	+	366	YALI0_C18777g	GO:0016020;GO:0016021	-	-	YALI0C18777p [Yarrowia lipolytica CLIB122]	YALI0_C18777g	YALI0C18777g	2909964
gene7063	261.939	390.643	133.235	0.341066	-1.55188	4.16143e-32	1.35484e-31	NC_006072.1	3919005	3919645	+	288	YALI0_F31559g	GO:0003735;GO:0005622;GO:0005840;GO:0006412	-	-	YALI0F31559p [Yarrowia lipolytica CLIB122]	YALI0_F31559g	YALI0F31559g	2907904
gene5379	369.087	539.767	198.406	0.367578	-1.44388	5.25341e-32	1.70603e-31	NC_006071.1	3438107	3439108	+	1002	YALI0_E29051g	GO:0003690;GO:0006281;GO:0046403;GO:0046404;GO:0046939;GO:0046940;GO:0050145;GO:0098504;GO:0098506	K08073	-	YALI0E29051p [Yarrowia lipolytica CLIB122]	YALI0_E29051g	YALI0E29051g	2911878
gene6520	401.181	567.278	235.084	0.414406	-1.27088	5.73166e-32	1.85664e-31	NC_006072.1	2561349	2562224	+	876	YALI0_F19140g	-	-	-	YALI0F19140p [Yarrowia lipolytica CLIB122]	YALI0_F19140g	YALI0F19140g	2907977
gene3296	500.261	690.738	309.785	0.448483	-1.15687	6.11577e-32	1.98006e-31	NC_006070.1	1117570	1118979	+	1410	YALI0_D08712g	GO:0003712;GO:0005634;GO:0006357;GO:0016592	-	-	YALI0D08712p [Yarrowia lipolytica CLIB122]	YALI0_D08712g	YALI0D08712g	2910671
gene3527	1653.41	2268.38	1038.43	0.457785	-1.12726	8.31516e-32	2.68537e-31	NC_006070.1	1714054	1715202	-	879	YALI0_D13838g	-	K18749	-	YALI0D13838p [Yarrowia lipolytica CLIB122]	YALI0_D13838g	YALI0D13838g	2910264
gene2293	323.676	469.139	178.213	0.379871	-1.39642	8.39025e-32	2.70826e-31	NC_006069.1	1348317	1349882	+	1566	YALI0_C09823g	GO:0005887;GO:0015225;GO:0015295;GO:0015718;GO:0015878;GO:0016020;GO:0016021;GO:0022857;GO:0031224;GO:0042886;GO:0055085;GO:1901604;GO:1902600	-	-	YALI0C09823p [Yarrowia lipolytica CLIB122]	YALI0_C09823g	YALI0C09823g	2909797
gene3607	351.877	503.278	200.476	0.398339	-1.32793	3.2465e-31	1.03697e-30	NC_006070.1	1934435	1935165	-	513	YALI0_D15818g	GO:0000122;GO:0003677;GO:0005730;GO:0006364	K15263	-	YALI0D15818p [Yarrowia lipolytica CLIB122]	YALI0_D15818g	YALI0D15818g	2910179
gene1062	243.978	365.48	122.475	0.335106	-1.57731	3.7771e-31	1.20465e-30	NC_006068.1	717362	718096	+	735	YALI0_B05214g	GO:0005737;GO:0016020;GO:0016021	-	-	YALI0B05214p [Yarrowia lipolytica CLIB122]	YALI0_B05214g	YALI0B05214g	2907564
gene2525	467.934	687.724	248.144	0.360819	-1.47065	6.03485e-31	1.91711e-30	NC_006069.1	2148363	2149289	+	927	YALI0_C15378g	-	-	-	YALI0C15378p [Yarrowia lipolytica CLIB122]	YALI0_C15378g	YALI0C15378g	2909405
gene6632	110.595	186.091	35.0983	0.188608	-2.40653	7.8172e-31	2.47963e-30	NC_006072.1	2863798	2864985	-	1188	YALI0_F21659g	GO:0000007;GO:0005385;GO:0005886;GO:0006811;GO:0016020;GO:0016021;GO:0030001;GO:0046873;GO:0055085;GO:0071577;GO:0071578	K14709	-	YALI0F21659p [Yarrowia lipolytica CLIB122]	YALI0_F21659g	YALI0F21659g	2907822
gene1007	514.657	704.647	324.667	0.460752	-1.11794	1.05036e-30	3.31701e-30	NC_006068.1	526532	527701	-	1170	YALI0_B03938g	GO:0005515	-	-	YALI0B03938p [Yarrowia lipolytica CLIB122]	YALI0_B03938g	YALI0B03938g	2907106
gene3495	607.793	839.272	376.314	0.448382	-1.1572	1.17014e-30	3.68981e-30	NC_006070.1	1619757	1620257	-	501	YALI0_D13068g	GO:0000055;GO:0003676;GO:0005623;GO:0008270;GO:0030687;GO:0043023;GO:0046872	K14821	-	YALI0D13068p [Yarrowia lipolytica CLIB122]	YALI0_D13068g	YALI0D13068g	2910808
gene2396	283.619	415.628	151.61	0.364774	-1.45493	1.19863e-30	3.77596e-30	NC_006069.1	1695312	1696634	+	1323	YALI0_C12232g	GO:0005887;GO:0016020;GO:0016021;GO:0055085;GO:0071627	-	-	YALI0C12232p [Yarrowia lipolytica CLIB122]	YALI0_C12232g	YALI0C12232g	2910120
gene6993	283.619	414.997	152.24	0.366847	-1.44675	2.3501e-30	7.36717e-30	NC_006072.1	3768335	3769192	-	858	YALI0_F30085g	GO:0005634;GO:0005730;GO:0008168;GO:0016433;GO:0016740;GO:0031167;GO:0032259	K18849	[EC:2.1.1.286]	YALI0F30085p [Yarrowia lipolytica CLIB122]	YALI0_F30085g	YALI0F30085g	2908712
gene828	219.984	332.735	107.233	0.322278	-1.63362	2.95969e-30	9.26002e-30	NC_006067.1	2251240	2252109	-	870	YALI0_A20988g	GO:0016020;GO:0016021	K15109	-	YALI0A20988p [Yarrowia lipolytica CLIB122]	YALI0_A20988g	YALI0A20988g	2905723
gene5422	424.573	592.016	257.129	0.434328	-1.20314	3.08196e-30	9.62849e-30	NC_006071.1	3547619	3549643	+	2025	YALI0_E29997g	-	-	-	YALI0E29997p [Yarrowia lipolytica CLIB122]	YALI0_E29997g	YALI0E29997g	2911461
gene2182	243.672	363.139	124.205	0.342031	-1.5478	4.48186e-30	1.39545e-29	NC_006069.1	967178	967774	+	597	YALI0_C07282g	GO:0000045;GO:0000407	-	-	YALI0C07282p [Yarrowia lipolytica CLIB122]	YALI0_C07282g	YALI0C07282g	2910023
gene3874	142.989	229.785	56.1931	0.244547	-2.03182	7.06689e-30	2.1918e-29	NC_006070.1	2819753	2820547	+	795	YALI0_D22220g	GO:0005737;GO:0008175;GO:0030488;GO:0031591	K15450	[EC:2.1.1.282]	YALI0D22220p [Yarrowia lipolytica CLIB122]	YALI0_D22220g	YALI0D22220g	2911049
gene3809	109.042	182.598	35.4859	0.194339	-2.36335	1.2698e-29	3.92313e-29	NC_006070.1	2613272	2613688	-	417	YALI0_D20592g	GO:0000166;GO:0001056;GO:0003824;GO:0005666;GO:0006352;GO:0006384;GO:0030880;GO:0044237	-	-	YALI0D20592p [Yarrowia lipolytica CLIB122]	YALI0_D20592g	YALI0D20592g	2910774
gene6601	420.889	585.517	256.261	0.437666	-1.1921	1.44909e-29	4.4749e-29	NC_006072.1	2786057	2787265	-	1209	YALI0_F20944g	GO:0005515;GO:0005634;GO:0016279;GO:0018026	-	-	YALI0F20944p [Yarrowia lipolytica CLIB122]	YALI0_F20944g	YALI0F20944g	2908938
gene3602	411.754	573.979	249.529	0.434735	-1.20179	1.71041e-29	5.26919e-29	NC_006070.1	1922418	1923158	+	741	YALI0_D15686g	-	-	-	YALI0D15686p [Yarrowia lipolytica CLIB122]	YALI0_D15686g	YALI0D15686g	2910174
gene5975	238.253	354.81	121.696	0.342989	-1.54376	2.08745e-29	6.42147e-29	NC_006072.1	1012108	1013577	+	1470	YALI0_F06842g	GO:0005886;GO:0005887;GO:0015233;GO:0015887;GO:0016020;GO:0016021;GO:0022857;GO:0031224;GO:0055085;GO:0098717	K03448	-	YALI0F06842p [Yarrowia lipolytica CLIB122]	YALI0_F06842g	YALI0F06842g	2908507
gene3353	277.94	405.182	150.699	0.37193	-1.4269	4.0344e-29	1.23456e-28	NC_006070.1	1259139	1262246	-	3108	YALI0_D09955g	GO:0000166;GO:0003723;GO:0004386;GO:0005524;GO:0005681;GO:0006397;GO:0016787	K12813	[EC:3.6.4.13]	YALI0D09955p [Yarrowia lipolytica CLIB122]	YALI0_D09955g	YALI0D09955g	2910929
gene5055	501.022	681.854	320.189	0.469586	-1.09054	9.28513e-29	2.82382e-28	NC_006071.1	2588379	2589134	+	756	YALI0_E21934g	GO:0000225;GO:0006506	K03434	[EC:3.5.1.89]	YALI0E21934p [Yarrowia lipolytica CLIB122]	YALI0_E21934g	YALI0E21934g	2911962
gene2331	314.466	450.022	178.91	0.397558	-1.33076	1.40243e-28	4.24301e-28	NC_006069.1	1488767	1489525	-	759	YALI0_C10736g	GO:0016020;GO:0016021	-	-	YALI0C10736p [Yarrowia lipolytica CLIB122]	YALI0_C10736g	YALI0C10736g	2909360
gene6931	612.793	817.557	408.029	0.499084	-1.00265	1.41202e-28	4.26998e-28	NC_006072.1	3616038	3617573	+	1536	YALI0_F28435g	GO:0003712;GO:0005634;GO:0006357;GO:0016592;GO:0070847	K15134	-	YALI0F28435p [Yarrowia lipolytica CLIB122]	YALI0_F28435g	YALI0F28435g	2908851
gene4221	371.503	521.372	221.633	0.425096	-1.23414	1.69243e-28	5.11315e-28	NC_006071.1	312863	315313	-	2451	YALI0_E02838g	-	-	-	YALI0E02838p [Yarrowia lipolytica CLIB122]	YALI0_E02838g	YALI0E02838g	2912121
gene5751	101.873	171.216	32.5305	0.189997	-2.39595	1.8935e-28	5.71792e-28	NC_006072.1	312006	312746	+	741	YALI0_F01991g	-	K14796	-	YALI0F01991p [Yarrowia lipolytica CLIB122]	YALI0_F01991g	YALI0F01991g	2908143
gene7043	487.233	663.263	311.204	0.469201	-1.09172	3.09207e-28	9.31103e-28	NC_006072.1	3885263	3886189	-	927	YALI0_F31141g	GO:0000290;GO:0000340;GO:0000932;GO:0005634;GO:0016787;GO:0050072	K12584	[EC:3.6.1.59]	YALI0F31141p [Yarrowia lipolytica CLIB122]	YALI0_F31141g	YALI0F31141g	2907663
gene1614	201.695	304.604	98.7866	0.324312	-1.62455	7.16681e-28	2.14303e-27	NC_006068.1	2340068	2340892	+	825	YALI0_B17886g	-	-	-	YALI0B17886p [Yarrowia lipolytica CLIB122]	YALI0_B17886g	YALI0B17886g	2906987
gene5532	190.56	318.642	62.479	0.196079	-2.35049	7.26022e-28	2.16995e-27	NC_006071.1	3824330	3825178	-	849	YALI0_E32219g	-	K19308	[EC:2.1.1.312]	YALI0E32219p [Yarrowia lipolytica CLIB122]	YALI0_E32219g	YALI0E32219g	2912459
gene6531	302.106	432.605	171.606	0.39668	-1.33395	8.68905e-28	2.59338e-27	NC_006072.1	2587697	2590837	-	3141	YALI0_F19404g	GO:0003677;GO:0003887;GO:0005739;GO:0005760;GO:0006260;GO:0006264;GO:0008408;GO:0071897;GO:0090305	K02332	[EC:2.7.7.7]	YALI0F19404p [Yarrowia lipolytica CLIB122]	YALI0_F19404g	YALI0F19404g	2908307
gene6997	402.653	557.744	247.562	0.443862	-1.17182	1.0737e-27	3.19866e-27	NC_006072.1	3774940	3776343	+	1404	YALI0_F30173g	GO:0000439;GO:0001671;GO:0003690;GO:0005634;GO:0005675;GO:0006281;GO:0006289;GO:0006974;GO:0008353;GO:0032781;GO:0070816	K03144	-	YALI0F30173p [Yarrowia lipolytica CLIB122]	YALI0_F30173g	YALI0F30173g	2908598
gene4096	481.952	654.848	309.057	0.471952	-1.08329	1.13614e-27	3.38154e-27	NC_006071.1	2299	3738	-	1440	YALI0_E00132g	GO:0000209;GO:0000413;GO:0003755;GO:0005634;GO:0006457;GO:0034450	K10598	[EC:5.2.1.8]	YALI0E00132p [Yarrowia lipolytica CLIB122]	YALI0_E00132g	YALI0E00132g	2912859
gene1814	248.328	364.324	132.333	0.363229	-1.46105	1.14267e-27	3.39941e-27	NC_006068.1	2936706	2938201	+	1446	YALI0_B22330g	GO:0000398;GO:0043085;GO:0061632;GO:0071014	-	-	YALI0B22330p [Yarrowia lipolytica CLIB122]	YALI0_B22330g	YALI0B22330g	2906866
gene4142	577.963	771.819	384.108	0.497666	-1.00675	1.1467e-27	3.40982e-27	NC_006071.1	130270	132159	+	1890	YALI0_E01144g	GO:0000001;GO:0005743;GO:0007005;GO:0016020;GO:0016021	K17979	-	YALI0E01144p [Yarrowia lipolytica CLIB122]	YALI0_E01144g	YALI0E01144g	2912940
gene1429	364.96	510.649	219.27	0.429395	-1.21962	1.41771e-27	4.20399e-27	NC_006068.1	1859342	1859683	+	342	YALI0_B13860g	GO:0000398;GO:0003676;GO:0003723;GO:0005686;GO:0071013	K12833	-	YALI0B13860p [Yarrowia lipolytica CLIB122]	YALI0_B13860g	YALI0B13860g	2907057
gene3571	530.175	711.807	348.543	0.489659	-1.03015	4.13298e-27	1.21825e-26	NC_006070.1	1817939	1818520	-	582	YALI0_D14982g	GO:0003723;GO:0005634;GO:0006397;GO:0046872;GO:0098789	K14404	-	YALI0D14982p [Yarrowia lipolytica CLIB122]	YALI0_D14982g	YALI0D14982g	2911334
gene4500	416.981	573.375	260.588	0.454481	-1.13771	4.58146e-27	1.34859e-26	NC_006071.1	1106919	1108392	+	1161	YALI0_E09276g	GO:0003824;GO:0004661;GO:0004662;GO:0005953;GO:0018342;GO:0018344	K11713	[EC:2.5.1.59]	YALI0E09276p [Yarrowia lipolytica CLIB122]	YALI0_E09276g	YALI0E09276g	2912528
gene3098	275.63	397.523	153.737	0.386738	-1.37057	5.14023e-27	1.51168e-26	NC_006070.1	538704	539636	-	933	YALI0_D04334g	GO:0000166;GO:0004672;GO:0004674;GO:0004693;GO:0005524;GO:0005634;GO:0005675;GO:0005737;GO:0006468;GO:0008353;GO:0045944;GO:0051726;GO:0070985	K02202	-	YALI0D04334p [Yarrowia lipolytica CLIB122]	YALI0_D04334g	YALI0D04334g	2910635
gene3258	170.614	262.487	78.7409	0.29998	-1.73706	5.63083e-27	1.65444e-26	NC_006070.1	1012121	1012699	-	579	YALI0_D07876g	GO:0003676;GO:0003723;GO:1990904	-	-	YALI0D07876p [Yarrowia lipolytica CLIB122]	YALI0_D07876g	YALI0D07876g	2910944
gene3096	322.188	454.935	189.441	0.416414	-1.26391	1.17765e-26	3.43186e-26	NC_006070.1	535642	536739	-	1098	YALI0_D04290g	GO:0005515	K17798	-	YALI0D04290p [Yarrowia lipolytica CLIB122]	YALI0_D04290g	YALI0D04290g	2910633
gene3306	530.977	711.231	350.722	0.49312	-1.01999	1.35266e-26	3.93832e-26	NC_006070.1	1138948	1139937	-	990	YALI0_D08910g	GO:0003951;GO:0016301;GO:0016310	-	-	YALI0D08910p [Yarrowia lipolytica CLIB122]	YALI0_D08910g	YALI0D08910g	2910680
gene2366	319.223	469.128	169.317	0.36092	-1.47025	1.37481e-26	4.00099e-26	NC_006069.1	1598464	1599048	-	585	YALI0_C11539g	GO:0004596;GO:0008080;GO:0017196;GO:0031417	K00670	[EC:2.3.1.256]	YALI0C11539p [Yarrowia lipolytica CLIB122]	YALI0_C11539g	YALI0C11539g	2909430
gene2614	301.153	428.748	173.558	0.404802	-1.30471	1.39927e-26	4.07033e-26	NC_006069.1	2464752	2466677	+	1926	YALI0_C17655g	-	-	-	YALI0C17655p [Yarrowia lipolytica CLIB122]	YALI0_C17655g	YALI0C17655g	2909997
gene205	133.243	212.209	54.2776	0.255775	-1.96705	1.45399e-26	4.22756e-26	NC_006067.1	536009	536866	+	858	YALI0_A05159g	-	-	-	YALI0A05159p [Yarrowia lipolytica CLIB122]	YALI0_A05159g	YALI0A05159g	2905846
gene4205	300.142	427.248	173.036	0.405001	-1.304	1.50855e-26	4.38422e-26	NC_006071.1	277666	279747	-	1989	YALI0_E02508g	GO:0000724;GO:0000784;GO:0003684;GO:0005515;GO:0006302;GO:0007095;GO:0016233;GO:0030870;GO:0032508;GO:0042770	K10868	-	YALI0E02508p [Yarrowia lipolytica CLIB122]	YALI0_E02508g	YALI0E02508g	2912106
gene4175	437.026	596.195	277.857	0.466051	-1.10144	1.71995e-26	4.99184e-26	NC_006071.1	201291	201800	-	510	YALI0_E01848g	GO:0000781;GO:0005634;GO:0005694;GO:0008033	K15901	-	YALI0E01848p [Yarrowia lipolytica CLIB122]	YALI0_E01848g	YALI0E01848g	2912061
gene4771	309.299	438.701	179.896	0.410066	-1.28607	1.73474e-26	5.03238e-26	NC_006071.1	1834378	1835943	-	1566	YALI0_E15400g	GO:0004028;GO:0006081;GO:0016020;GO:0016021;GO:0016491;GO:0016620;GO:0055114	-	-	YALI0E15400p [Yarrowia lipolytica CLIB122]	YALI0_E15400g	YALI0E15400g	2911999
gene6409	110.954	181.614	40.2947	0.22187	-2.17221	1.82752e-26	5.29684e-26	NC_006072.1	2241852	2243084	-	1233	YALI0_F16731g	GO:0005811	-	-	YALI0F16731p [Yarrowia lipolytica CLIB122]	YALI0_F16731g	YALI0F16731g	2907989
gene3842	243.947	355.137	132.757	0.373818	-1.41959	5.45484e-26	1.56827e-25	NC_006070.1	2714487	2715250	+	681	YALI0_D21450g	GO:0000398;GO:0003676;GO:0003723;GO:0005685;GO:0030619	-	-	YALI0D21450p [Yarrowia lipolytica CLIB122]	YALI0_D21450g	YALI0D21450g	2910768
gene5057	177.953	270.164	85.7415	0.317369	-1.65577	7.93707e-26	2.26971e-25	NC_006071.1	2591657	2593369	+	1713	YALI0_E21978g	GO:0033314	K03507	-	YALI0E21978p [Yarrowia lipolytica CLIB122]	YALI0_E21978g	YALI0E21978g	2911964
gene4206	267.079	394.098	140.061	0.355395	-1.4925	1.00411e-25	2.86117e-25	NC_006071.1	280113	280608	-	363	YALI0_E02530g	GO:0000184;GO:0000381;GO:0003676;GO:0003723;GO:0003729;GO:0035145	K12876	-	YALI0E02530p [Yarrowia lipolytica CLIB122]	YALI0_E02530g	YALI0E02530g	2912105
gene6725	441.906	599.364	284.449	0.474585	-1.07526	1.77038e-25	5.02234e-25	NC_006072.1	3122973	3125441	-	2469	YALI0_F23815g	GO:0000122;GO:0001012;GO:0001139;GO:0005634;GO:0006351;GO:0031440;GO:0031564;GO:0045899;GO:0046872;GO:0051123	-	-	YALI0F23815p [Yarrowia lipolytica CLIB122]	YALI0_F23815g	YALI0F23815g	2908747
gene4965	150.847	233.644	68.0496	0.291253	-1.77965	2.82632e-25	7.98963e-25	NC_006071.1	2369888	2370946	+	1059	YALI0_E19899g	GO:0003824	K08726	-	YALI0E19899p [Yarrowia lipolytica CLIB122]	YALI0_E19899g	YALI0E19899g	2911786
gene1526	336.834	468.172	205.496	0.438932	-1.18793	1.08316e-24	3.02991e-24	NC_006068.1	2115957	2118458	+	2502	YALI0_B15972g	GO:0004621;GO:0005615;GO:0006507;GO:0031012	K01127	[EC:3.1.4.50]	YALI0B15972p [Yarrowia lipolytica CLIB122]	YALI0_B15972g	YALI0B15972g	2906823
gene3429	271.194	396.478	145.91	0.368016	-1.44216	1.56656e-24	4.3669e-24	NC_006070.1	1439688	1440701	+	1014	YALI0_D11528g	GO:0000151;GO:0000209;GO:0005634;GO:0005829;GO:0006513;GO:0030332;GO:0031624;GO:0043161;GO:0051865;GO:0061630	K17780	[EC:2.3.2.26]	YALI0D11528p [Yarrowia lipolytica CLIB122]	YALI0_D11528g	YALI0D11528g	2910357
gene3815	413.875	561.706	266.044	0.473635	-1.07815	2.23957e-24	6.23756e-24	NC_006070.1	2631548	2632459	+	912	YALI0_D20724g	GO:0036047;GO:0036049;GO:0036054;GO:0036055;GO:0070403	-	-	YALI0D20724p [Yarrowia lipolytica CLIB122]	YALI0_D20724g	YALI0D20724g	2910151
gene2102	379.601	519.622	239.579	0.461065	-1.11696	2.73354e-24	7.60674e-24	NC_006069.1	710484	711434	-	951	YALI0_C05555g	GO:0005515	K12857	-	YALI0C05555p [Yarrowia lipolytica CLIB122]	YALI0_C05555g	YALI0C05555g	2910100
gene4876	371.031	508.332	233.73	0.459798	-1.12093	4.36375e-24	1.21029e-23	NC_006071.1	2109955	2110959	-	561	YALI0_E17897g	-	-	-	YALI0E17897p [Yarrowia lipolytica CLIB122]	YALI0_E17897g	YALI0E17897g	2911690
gene6642	337.421	466.555	208.286	0.446435	-1.16348	6.71426e-24	1.84995e-23	NC_006072.1	2895685	2896824	+	1140	YALI0_F21879g	GO:0000993;GO:0002098;GO:0005737;GO:0006357;GO:0008023;GO:0033588	K11375	-	YALI0F21879p [Yarrowia lipolytica CLIB122]	YALI0_F21879g	YALI0F21879g	2908841
gene3226	1253.78	1686.23	821.338	0.487086	-1.03775	7.59512e-24	2.09175e-23	NC_006070.1	916623	919328	+	2706	YALI0_D07194g	GO:0003712;GO:0005634;GO:0006357;GO:0016592;GO:0070847	K15156	-	YALI0D07194p [Yarrowia lipolytica CLIB122]	YALI0_D07194g	YALI0D07194g	2910799
gene1741	386.584	525.765	247.404	0.470559	-1.08755	1.39084e-23	3.81249e-23	NC_006068.1	2736504	2737466	+	963	YALI0_B20790g	-	-	-	YALI0B20790p [Yarrowia lipolytica CLIB122]	YALI0_B20790g	YALI0B20790g	2907324
gene6827	293.996	412.567	175.425	0.425205	-1.23377	1.41159e-23	3.86772e-23	NC_006072.1	3359518	3359871	+	276	YALI0_F26136g	GO:0000124;GO:0000932;GO:0003682;GO:0003713;GO:0005634;GO:0005643;GO:0005654;GO:0005737;GO:0006325;GO:0006357;GO:0006368;GO:0006406;GO:0015031;GO:0016578;GO:0016973;GO:0045893;GO:0051028;GO:0070390;GO:0071819	K11368	-	YALI0F26136p [Yarrowia lipolytica CLIB122]	YALI0_F26136g	YALI0F26136g	7009640
gene4697	556.42	748.548	364.293	0.486667	-1.03899	1.7788e-23	4.8697e-23	NC_006071.1	1655046	1655678	+	633	YALI0_E13684g	GO:0000776;GO:0005654;GO:0005737;GO:0007094	K02537	-	YALI0E13684p [Yarrowia lipolytica CLIB122]	YALI0_E13684g	YALI0E13684g	2911482
gene3941	145.994	229.248	62.7403	0.273678	-1.86945	1.83278e-23	5.01107e-23	NC_006070.1	3094340	3096541	+	2202	YALI0_D23749g	GO:0000977;GO:0000981;GO:0003676;GO:0005634;GO:0006357	-	-	YALI0D23749p [Yarrowia lipolytica CLIB122]	YALI0_D23749g	YALI0D23749g	2910883
gene5187	344.704	474.066	215.343	0.454247	-1.13845	2.65828e-23	7.2557e-23	NC_006071.1	2961812	2962699	-	393	YALI0_E24761g	GO:0018364;GO:0030488;GO:0046872;GO:0046982;GO:0070476	K15448	-	YALI0E24761p [Yarrowia lipolytica CLIB122]	YALI0_E24761g	YALI0E24761g	2912662
gene3029	154.091	234.546	73.6366	0.313954	-1.67138	3.49133e-23	9.48915e-23	NC_006070.1	324416	325315	+	900	YALI0_D02651g	-	-	-	YALI0D02651p [Yarrowia lipolytica CLIB122]	YALI0_D02651g	YALI0D02651g	2910536
gene5887	442.702	592.248	293.157	0.494991	-1.01453	5.30469e-23	1.4363e-22	NC_006072.1	765528	766737	+	837	YALI0_F05060g	GO:0016020;GO:0016021	-	-	YALI0F05060p [Yarrowia lipolytica CLIB122]	YALI0_F05060g	YALI0F05060g	2908628
gene2244	392.717	531.555	253.878	0.477614	-1.06608	5.47069e-23	1.48062e-22	NC_006069.1	1186926	1189922	+	2997	YALI0_C08767g	GO:0000226;GO:0005096;GO:0006457;GO:0007021;GO:0007023;GO:0043547;GO:0048487	K21767	-	YALI0C08767p [Yarrowia lipolytica CLIB122]	YALI0_C08767g	YALI0C08767g	2910015
gene1832	437.146	585.299	288.993	0.493752	-1.01814	6.02579e-23	1.62811e-22	NC_006068.1	2987664	2991053	+	3390	YALI0_B22726g	GO:0005829;GO:0006891;GO:0034498;GO:1990071	K20307	-	YALI0B22726p [Yarrowia lipolytica CLIB122]	YALI0_B22726g	YALI0B22726g	2907187
gene4543	231.528	332.591	130.464	0.392265	-1.3501	9.59786e-23	2.58345e-22	NC_006071.1	1266779	1268596	-	1818	YALI0_E10241g	-	-	-	YALI0E10241p [Yarrowia lipolytica CLIB122]	YALI0_E10241g	YALI0E10241g	2912592
gene1351	179.023	265.697	92.3496	0.347576	-1.5246	1.41379e-22	3.79752e-22	NC_006068.1	1610104	1611312	-	1209	YALI0_B12034g	-	-	-	YALI0B12034p [Yarrowia lipolytica CLIB122]	YALI0_B12034g	YALI0B12034g	2907002
gene3727	329.942	469.493	190.391	0.405525	-1.30214	1.92336e-22	5.15907e-22	NC_006070.1	2359369	2360607	+	1239	YALI0_D18700g	GO:0000460;GO:0000470;GO:0004519;GO:0006364;GO:0030687;GO:0090305;GO:0090730	K16912	-	YALI0D18700p [Yarrowia lipolytica CLIB122]	YALI0_D18700g	YALI0D18700g	2911134
gene1420	305.938	430.746	181.13	0.420504	-1.24981	2.04998e-22	5.49487e-22	NC_006068.1	1841546	1842340	+	795	YALI0_B13662g	GO:0000166;GO:0003924;GO:0005525;GO:0005622;GO:0005737;GO:0005886;GO:0005938;GO:0007015;GO:0007264;GO:0007266;GO:0008360;GO:0019901;GO:0030334;GO:0030950;GO:0032153;GO:0032956;GO:0043231;GO:0051017	-	-	YALI0B13662p [Yarrowia lipolytica CLIB122]	YALI0_B13662g	YALI0B13662g	2907310
gene4168	310.112	428.629	191.594	0.446992	-1.16168	3.00095e-22	8.01711e-22	NC_006071.1	191088	191927	+	699	YALI0_E01694g	-	-	-	YALI0E01694p [Yarrowia lipolytica CLIB122]	YALI0_E01694g	YALI0E01694g	2912054
gene5438	218.737	314.374	123.101	0.391575	-1.35264	8.17561e-22	2.17148e-21	NC_006071.1	3575276	3579232	-	3957	YALI0_E30349g	-	-	-	YALI0E30349p [Yarrowia lipolytica CLIB122]	YALI0_E30349g	YALI0E30349g	2911934
gene2845	226.1	323.603	128.597	0.397391	-1.33137	8.32547e-22	2.20945e-21	NC_006069.1	3065430	3066769	-	1275	YALI0_C22858g	GO:0005515;GO:0048188	K14961	-	YALI0C22858p [Yarrowia lipolytica CLIB122]	YALI0_C22858g	YALI0C22858g	2909634
gene4216	155.868	234.497	77.2387	0.329379	-1.60218	8.62934e-22	2.28915e-21	NC_006071.1	304193	305842	+	1650	YALI0_E02750g	GO:0003723;GO:0004386;GO:0071013	-	-	YALI0E02750p [Yarrowia lipolytica CLIB122]	YALI0_E02750g	YALI0E02750g	2912646
gene5359	419.916	560.654	279.177	0.49795	-1.00593	9.21722e-22	2.44409e-21	NC_006071.1	3396906	3399245	-	2340	YALI0_E28644g	GO:0005515	K17674	-	YALI0E28644p [Yarrowia lipolytica CLIB122]	YALI0_E28644g	YALI0E28644g	2911624
gene4390	172.336	255.513	89.159	0.348941	-1.51894	9.84915e-22	2.6095e-21	NC_006071.1	769186	769968	-	783	YALI0_E06677g	GO:0004525;GO:0006396;GO:0090501;GO:0090502	-	-	YALI0E06677p [Yarrowia lipolytica CLIB122]	YALI0_E06677g	YALI0E06677g	2912407
gene1079	313.189	430.2	196.178	0.456016	-1.13284	1.99855e-21	5.2733e-21	NC_006068.1	762310	763869	-	1560	YALI0_B05632g	GO:0000398;GO:0046540	K12843	-	YALI0B05632p [Yarrowia lipolytica CLIB122]	YALI0_B05632g	YALI0B05632g	2907450
gene1471	386.251	518.565	253.936	0.48969	-1.03006	2.2081e-21	5.81666e-21	NC_006068.1	1961480	1963875	+	1584	YALI0_B14773g	GO:0000228;GO:0003677;GO:0003700;GO:0006355;GO:0045944;GO:0051321	K12769	-	YALI0B14773p [Yarrowia lipolytica CLIB122]	YALI0_B14773g	YALI0B14773g	2907120
gene2206	151.561	240.29	62.833	0.261488	-1.93518	2.58848e-21	6.8047e-21	NC_006069.1	1042842	1043750	-	909	YALI0_C07865g	-	-	-	YALI0C07865p [Yarrowia lipolytica CLIB122]	YALI0_C07865g	YALI0C07865g	2909779
gene5898	209.298	305.457	113.138	0.370391	-1.43288	2.6447e-21	6.94965e-21	NC_006072.1	789924	790733	-	810	YALI0_F05302g	-	-	-	YALI0F05302p [Yarrowia lipolytica CLIB122]	YALI0_F05302g	YALI0F05302g	2908167
gene3827	321.929	451.152	192.706	0.427141	-1.22722	2.68747e-21	7.05626e-21	NC_006070.1	2662772	2663422	-	651	YALI0_D21032g	GO:0006487;GO:0008610;GO:0016020;GO:0016021;GO:0016787;GO:0030176;GO:0047874	K07252	[EC:3.6.1.43]	YALI0D21032p [Yarrowia lipolytica CLIB122]	YALI0_D21032g	YALI0D21032g	2911055
gene3680	307.338	422.425	192.252	0.455114	-1.1357	2.86086e-21	7.50843e-21	NC_006070.1	2160692	2161789	+	1098	YALI0_D17600g	GO:0000049;GO:0002098;GO:0002143;GO:0002144;GO:0003723;GO:0005737;GO:0005829;GO:0008033;GO:0016740;GO:0016779;GO:0032447;GO:0034227	K14168	[EC:2.7.7.-]	YALI0D17600p [Yarrowia lipolytica CLIB122]	YALI0_D17600g	YALI0D17600g	2911306
gene1900	220.226	314.43	126.023	0.400797	-1.31906	5.44435e-21	1.4173e-20	NC_006069.1	103530	105071	+	1542	YALI0_C00781g	-	-	-	YALI0C00781p [Yarrowia lipolytica CLIB122]	YALI0_C00781g	YALI0C00781g	2909167
gene5337	367.404	493.183	241.625	0.48993	-1.02935	1.68485e-20	4.34727e-20	NC_006071.1	3331261	3332619	-	1359	YALI0_E28226g	GO:0000398;GO:0005515;GO:0017070;GO:0030621;GO:0046540	K12662	-	YALI0E28226p [Yarrowia lipolytica CLIB122]	YALI0_E28226g	YALI0E28226g	2911603
gene3985	293.981	415.079	172.883	0.416506	-1.26359	1.70213e-20	4.38834e-20	NC_006070.1	3295837	3297240	-	1404	YALI0_D24772g	GO:0016020;GO:0016021	-	-	YALI0D24772p [Yarrowia lipolytica CLIB122]	YALI0_D24772g	YALI0D24772g	2910557
gene5801	150.783	225.429	76.136	0.337738	-1.56602	2.31592e-20	5.95642e-20	NC_006072.1	429078	431480	-	2403	YALI0_F03113g	GO:0004672;GO:0005524;GO:0005634;GO:0005737;GO:0006468;GO:0010468;GO:0035556	K12765	[EC:2.7.11.1]	YALI0F03113p [Yarrowia lipolytica CLIB122]	YALI0_F03113g	YALI0F03113g	2907759
gene1048	287.477	395.548	179.407	0.453565	-1.14062	2.39154e-20	6.14843e-20	NC_006068.1	669842	670917	-	318	YALI0_B04851g	GO:0001054;GO:0001055;GO:0001056;GO:0003677;GO:0003899;GO:0005665;GO:0005666;GO:0005736;GO:0006351;GO:0006360;GO:0006366;GO:0008270;GO:0042797	K03007	-	YALI0B04851p [Yarrowia lipolytica CLIB122]	YALI0_B04851g	YALI0B04851g	7009397
gene5242	73.418	128.359	18.4766	0.143945	-2.79642	3.13966e-20	8.04922e-20	NC_006071.1	3097690	3098769	+	1080	YALI0_E26059g	GO:0002943;GO:0003824;GO:0008033;GO:0016491;GO:0017150;GO:0050660;GO:0055114	K05545	[EC:1.3.1.90]	YALI0E26059p [Yarrowia lipolytica CLIB122]	YALI0_E26059g	YALI0E26059g	2912623
gene2409	104.427	164.507	44.3474	0.269577	-1.89123	3.96154e-20	1.01239e-19	NC_006069.1	1749778	1750953	-	1176	YALI0_C12518g	-	-	-	YALI0C12518p [Yarrowia lipolytica CLIB122]	YALI0_C12518g	YALI0C12518g	2909387
gene5608	245.169	343.282	147.056	0.428382	-1.22303	4.00781e-20	1.02381e-19	NC_006071.1	4020964	4022034	+	1071	YALI0_E33847g	GO:0000398;GO:0000974;GO:0003676;GO:0003723;GO:0005634;GO:0005681;GO:0006397;GO:0008380;GO:0017070;GO:0036002;GO:0071006;GO:0071007	K12872	-	YALI0E33847p [Yarrowia lipolytica CLIB122]	YALI0_E33847g	YALI0E33847g	2912833
gene6940	158.534	234.627	82.4406	0.351369	-1.50894	5.44636e-20	1.38908e-19	NC_006072.1	3635184	3637322	+	2139	YALI0_F28633g	-	-	-	YALI0F28633p [Yarrowia lipolytica CLIB122]	YALI0_F28633g	YALI0F28633g	2907679
gene2955	299.602	409.412	189.792	0.463572	-1.10914	5.54039e-20	1.4125e-19	NC_006070.1	95050	97065	+	2016	YALI0_D00891g	GO:0005777;GO:0005778;GO:0007031;GO:0016020;GO:0016021	-	-	YALI0D00891p [Yarrowia lipolytica CLIB122]	YALI0_D00891g	YALI0D00891g	2910294
gene4170	136.884	214.212	59.5552	0.27802	-1.84674	1.21118e-19	3.05629e-19	NC_006071.1	192425	193261	-	837	YALI0_E01738g	GO:0002098;GO:0006357;GO:0033588	K15456	-	YALI0E01738p [Yarrowia lipolytica CLIB122]	YALI0_E01738g	YALI0E01738g	2912056
gene5352	283.462	452	114.924	0.254256	-1.97564	1.94679e-19	4.88946e-19	NC_006071.1	3371312	3373339	-	2028	YALI0_E28512g	GO:0005635;GO:0006998;GO:0016020;GO:0016021;GO:0031965;GO:0055088	-	-	YALI0E28512p [Yarrowia lipolytica CLIB122]	YALI0_E28512g	YALI0E28512g	2911617
gene4699	113.276	174.684	51.8688	0.29693	-1.75181	3.21818e-19	8.05423e-19	NC_006071.1	1659955	1660623	+	669	YALI0_E13728g	GO:0002100;GO:0003824;GO:0008270;GO:0016787;GO:0052717;GO:0052718	K15441	[EC:3.5.4.-]	YALI0E13728p [Yarrowia lipolytica CLIB122]	YALI0_E13728g	YALI0E13728g	2911483
gene5663	110.028	170.12	49.9354	0.29353	-1.76842	5.96205e-19	1.48577e-18	NC_006071.1	4201039	4206675	+	5463	YALI0_E35156g	GO:0000166;GO:0005524;GO:0016874;GO:0046872	-	-	YALI0E35156p [Yarrowia lipolytica CLIB122]	YALI0_E35156g	YALI0E35156g	2912284
gene4384	47.8692	84.3026	11.4358	0.135652	-2.88202	1.38603e-18	3.43404e-18	NC_006071.1	753407	753898	-	492	YALI0_E06545g	GO:0002098;GO:0005634;GO:0005737;GO:0005829;GO:0017183;GO:0046872	K17867	-	YALI0E06545p [Yarrowia lipolytica CLIB122]	YALI0_E06545g	YALI0E06545g	2912398
gene2426	234.021	325.27	142.773	0.438937	-1.18791	1.78328e-18	4.40804e-18	NC_006069.1	1788779	1790071	-	1293	YALI0_C12980g	GO:0000324;GO:0004190;GO:0006508;GO:0008233;GO:0016787;GO:0030163;GO:0051603	-	-	YALI0C12980p [Yarrowia lipolytica CLIB122]	YALI0_C12980g	YALI0C12980g	2909521
gene6805	320.895	430.725	211.064	0.49002	-1.02909	1.89888e-18	4.68838e-18	NC_006072.1	3296754	3297800	-	1047	YALI0_F25641g	GO:0008168;GO:0008898;GO:0009086;GO:0016740;GO:0032259;GO:0033528;GO:0046872	K00547	[EC:2.1.1.10]	YALI0F25641p [Yarrowia lipolytica CLIB122]	YALI0_F25641g	YALI0F25641g	2907792
gene5267	183.399	262.56	104.238	0.397007	-1.33276	2.65105e-18	6.52793e-18	NC_006071.1	3155334	3156110	-	777	YALI0_E26587g	GO:0003723;GO:0003824;GO:0004526;GO:0004540;GO:0005655;GO:0008033;GO:0090501;GO:0090502	K03539	[EC:3.1.26.5]	YALI0E26587p [Yarrowia lipolytica CLIB122]	YALI0_E26587g	YALI0E26587g	2912383
gene5171	225.067	313.705	136.429	0.434895	-1.20126	3.21017e-18	7.89561e-18	NC_006071.1	2909046	2909675	-	270	YALI0_E24409g	GO:0005739;GO:0005758	-	-	YALI0E24409p [Yarrowia lipolytica CLIB122]	YALI0_E24409g	YALI0E24409g	2912545
gene4267	263.778	359.797	167.76	0.466262	-1.10079	9.67706e-18	2.35934e-17	NC_006071.1	437151	437618	+	468	YALI0_E03916g	GO:0016020;GO:0016021	-	-	YALI0E03916p [Yarrowia lipolytica CLIB122]	YALI0_E03916g	YALI0E03916g	2912171
gene2557	218.947	374.332	63.5612	0.169799	-2.5581	9.68783e-18	2.36106e-17	NC_006069.1	2295675	2299085	+	3411	YALI0_C16247g	GO:0001732;GO:0002188;GO:0003729;GO:0003743;GO:0005852;GO:0043614;GO:0071540;GO:0071541	-	-	YALI0C16247p [Yarrowia lipolytica CLIB122]	YALI0_C16247g	YALI0C16247g	2909256
gene3304	305.292	408.967	201.617	0.49299	-1.02037	1.52772e-17	3.712e-17	NC_006070.1	1135133	1136221	+	1089	YALI0_D08866g	GO:0005737;GO:0005783;GO:0005789;GO:0005829;GO:0005886;GO:0006869;GO:0008526;GO:0015914;GO:0016020;GO:0017157;GO:0031090;GO:0032541;GO:0043001;GO:0043231	K19996	-	YALI0D08866p [Yarrowia lipolytica CLIB122]	YALI0_D08866g	YALI0D08866g	2910678
gene1883	246.424	335.783	157.064	0.467756	-1.09617	9.21073e-17	2.19804e-16	NC_006069.1	46411	46866	+	456	YALI0_C00407g	GO:0003862;GO:0009098;GO:0016616;GO:0055114	K00052	[EC:1.1.1.85]	YALI0C00407p [Yarrowia lipolytica CLIB122]	YALI0_C00407g	YALI0C00407g	2909561
gene6780	112.262	170.256	54.2685	0.318746	-1.64952	1.16931e-16	2.78113e-16	NC_006072.1	3238319	3239518	-	1200	YALI0_F25069g	GO:0002143;GO:0005739;GO:0008033;GO:0016740;GO:0016783	K21027	[EC:2.8.1.14]	YALI0F25069p [Yarrowia lipolytica CLIB122]	YALI0_F25069g	YALI0F25069g	2908454
gene6546	114.073	171.583	56.5629	0.329653	-1.60098	1.25228e-16	2.97514e-16	NC_006072.1	2624359	2626026	+	1668	YALI0_F19734g	GO:0005886;GO:0006812;GO:0006876;GO:0006879;GO:0006882;GO:0008324;GO:0015086;GO:0015093;GO:0015341;GO:0016020;GO:0016021;GO:0034220;GO:0034755;GO:0055085;GO:0070574;GO:0071577;GO:0072511;GO:0098655	-	-	YALI0F19734p [Yarrowia lipolytica CLIB122]	YALI0_F19734g	YALI0F19734g	2908296
gene2488	94.6307	146.429	42.8323	0.292512	-1.77343	1.27504e-16	3.02699e-16	NC_006069.1	2007779	2008324	-	546	YALI0_C14608g	-	K10427	-	YALI0C14608p [Yarrowia lipolytica CLIB122]	YALI0_C14608g	YALI0C14608g	2909733
gene4174	452.427	610.379	294.475	0.482447	-1.05156	1.37841e-16	3.26876e-16	NC_006071.1	200057	201097	+	1041	YALI0_E01826g	GO:0000079;GO:0005634;GO:0005675;GO:0006289;GO:0006357;GO:0045737;GO:0046872;GO:0061575	K10842	-	YALI0E01826p [Yarrowia lipolytica CLIB122]	YALI0_E01826g	YALI0E01826g	2912060
gene5960	254.898	344.995	164.801	0.477692	-1.06585	2.43791e-16	5.75361e-16	NC_006072.1	967331	969418	-	2088	YALI0_F06534g	GO:0000346;GO:0000398;GO:0003677;GO:0003723;GO:0005524;GO:0016787	K17677	[EC:3.6.4.-]	YALI0F06534p [Yarrowia lipolytica CLIB122]	YALI0_F06534g	YALI0F06534g	2908077
gene5530	52.7342	89.1495	16.3189	0.183051	-2.44969	2.77943e-16	6.54998e-16	NC_006071.1	3822162	3822851	+	690	YALI0_E32197g	-	-	-	YALI0E32197p [Yarrowia lipolytica CLIB122]	YALI0_E32197g	YALI0E32197g	2912356
gene1228	95.6937	151.88	39.5073	0.260122	-1.94274	3.55409e-16	8.35101e-16	NC_006068.1	1258787	1260208	-	1422	YALI0_B09251g	GO:0016020;GO:0016021	-	-	YALI0B09251p [Yarrowia lipolytica CLIB122]	YALI0_B09251g	YALI0B09251g	2907500
gene2265	474.153	685.163	263.142	0.384058	-1.38061	4.35596e-16	1.02127e-15	NC_006069.1	1252037	1254331	+	2295	YALI0_C09185g	GO:0000976;GO:0003677;GO:0003700;GO:0005515;GO:0005634;GO:0006355;GO:0043565	-	-	YALI0C09185p [Yarrowia lipolytica CLIB122]	YALI0_C09185g	YALI0C09185g	2909712
gene6927	158.74	226.911	90.5694	0.39914	-1.32503	4.49761e-16	1.05371e-15	NC_006072.1	3606857	3607678	+	822	YALI0_F28347g	-	-	-	YALI0F28347p [Yarrowia lipolytica CLIB122]	YALI0_F28347g	YALI0F28347g	2908861
gene367	58.155	96.35	19.96	0.207161	-2.27117	7.04407e-16	1.64132e-15	NC_006067.1	928586	930151	-	1566	YALI0_A09383g	GO:0005887;GO:0016020;GO:0016021;GO:0022857;GO:0031224;GO:0055085	-	-	YALI0A09383p [Yarrowia lipolytica CLIB122]	YALI0_A09383g	YALI0A09383g	2905803
gene3598	163.061	231.241	94.8814	0.410314	-1.2852	1.35217e-15	3.13359e-15	NC_006070.1	1908424	1910370	-	1947	YALI0_D15598g	GO:0003824;GO:0004555;GO:0005991;GO:0008152;GO:0016787;GO:0016798	K01194	[EC:3.2.1.28]	YALI0D15598p [Yarrowia lipolytica CLIB122]	YALI0_D15598g	YALI0D15598g	2910170
gene3077	179.647	251.31	107.984	0.429683	-1.21865	1.88748e-15	4.35524e-15	NC_006070.1	481413	488465	+	6849	YALI0_D03888g	GO:0000077;GO:0000166;GO:0000723;GO:0000781;GO:0004674;GO:0005515;GO:0005524;GO:0005634;GO:0005694;GO:0006281;GO:0006325;GO:0006974;GO:0008630;GO:0010212;GO:0016301;GO:0016310;GO:0016568;GO:0016572;GO:0016740;GO:0090399;GO:1904262	K04728	[EC:2.7.11.1]	YALI0D03888p [Yarrowia lipolytica CLIB122]	YALI0_D03888g	YALI0D03888g	2910592
gene1709	86.3883	133.571	39.206	0.293523	-1.76845	2.2927e-15	5.27511e-15	NC_006068.1	2640126	2641997	-	1872	YALI0_B20064g	GO:0003333;GO:0015171;GO:0016020;GO:0016021;GO:0022857;GO:0055085	-	-	YALI0B20064p [Yarrowia lipolytica CLIB122]	YALI0_B20064g	YALI0B20064g	2906891
gene6476	509.083	692.179	325.988	0.470959	-1.08633	1.06552e-14	2.41777e-14	NC_006072.1	2420647	2421228	+	582	YALI0_F18194g	GO:0004721;GO:0005634;GO:0005847;GO:0006369;GO:0006378;GO:0006397;GO:0008420;GO:0016787;GO:0070940	K15544	[EC:3.1.3.16]	YALI0F18194p [Yarrowia lipolytica CLIB122]	YALI0_F18194g	YALI0F18194g	2908669
gene4420	101.472	151.844	51.1006	0.336532	-1.57118	1.26792e-14	2.87094e-14	NC_006071.1	843609	844658	-	1050	YALI0_E07381g	GO:0016787	-	-	YALI0E07381p [Yarrowia lipolytica CLIB122]	YALI0_E07381g	YALI0E07381g	2912438
gene6023	250.858	334.683	167.032	0.499076	-1.00267	1.66061e-14	3.75084e-14	NC_006072.1	1130259	1130805	-	498	YALI0_F07953g	GO:0000463;GO:0000492;GO:0005634;GO:0046872;GO:0048254;GO:0070761	-	-	YALI0F07953p [Yarrowia lipolytica CLIB122]	YALI0_F07953g	YALI0F07953g	2908982
gene5297	245.887	328.382	163.392	0.497567	-1.00704	2.11809e-14	4.7724e-14	NC_006071.1	3232740	3235202	+	2463	YALI0_E27269g	GO:0000725;GO:0003677;GO:0003678;GO:0005524;GO:0005634;GO:0006281;GO:0016787;GO:0032508	K03657	[EC:3.6.4.12]	YALI0E27269p [Yarrowia lipolytica CLIB122]	YALI0_E27269g	YALI0E27269g	2912243
gene2214	44.9062	76.1111	13.7012	0.180016	-2.4738	2.87333e-14	6.45819e-14	NC_006069.1	1064312	1065418	-	1107	YALI0_C08074g	GO:0005737;GO:0008863;GO:0016491;GO:0016616;GO:0042183;GO:0051287;GO:0055114	K00122	[EC:1.17.1.9]	YALI0C08074p [Yarrowia lipolytica CLIB122]	YALI0_C08074g	YALI0C08074g	2909481
gene4173	170.346	236.439	104.254	0.440933	-1.18137	4.36928e-14	9.75903e-14	NC_006071.1	198421	199425	-	1005	YALI0_E01804g	GO:0005783;GO:0005794;GO:0006612;GO:0016020;GO:0016021;GO:0016409;GO:0016740;GO:0016746;GO:0018230;GO:0019706	K18932	[EC:2.3.1.225]	YALI0E01804p [Yarrowia lipolytica CLIB122]	YALI0_E01804g	YALI0E01804g	2912059
gene3562	172.972	239.557	106.387	0.444099	-1.17105	5.14687e-14	1.14798e-13	NC_006070.1	1794245	1796599	-	2355	YALI0_D14740g	GO:0004198;GO:0005622;GO:0006508	-	-	YALI0D14740p [Yarrowia lipolytica CLIB122]	YALI0_D14740g	YALI0D14740g	2910310
gene5986	107.457	158.328	56.5864	0.3574	-1.48439	6.02622e-14	1.34132e-13	NC_006072.1	1046684	1048420	-	1737	YALI0_F07106g	GO:0000329;GO:0003333;GO:0005290;GO:0005302;GO:0005313;GO:0015171;GO:0015189;GO:0015194;GO:0015813;GO:0015825;GO:0015828;GO:0016020;GO:0016021;GO:0061459;GO:0089709;GO:1903400;GO:1903401	-	-	YALI0F07106p [Yarrowia lipolytica CLIB122]	YALI0_F07106g	YALI0F07106g	2908464
gene3058	141.171	208.001	74.3402	0.357403	-1.48438	6.67515e-14	1.4837e-13	NC_006070.1	427029	427616	-	588	YALI0_D03355g	-	K14531	-	YALI0D03355p [Yarrowia lipolytica CLIB122]	YALI0_D03355g	YALI0D03355g	2910571
gene6293	169.298	234.809	103.787	0.442005	-1.17786	7.33206e-14	1.62521e-13	NC_006072.1	1906880	1909669	-	2790	YALI0_F14179g	GO:0000166;GO:0003774;GO:0003777;GO:0005524;GO:0005634;GO:0005871;GO:0005874;GO:0005876;GO:0007018;GO:0008017;GO:0008574;GO:0016887;GO:0090307	K10398	-	YALI0F14179p [Yarrowia lipolytica CLIB122]	YALI0_F14179g	YALI0F14179g	2908581
gene5448	134.606	191.605	77.6058	0.405029	-1.3039	1.2521e-13	2.75634e-13	NC_006071.1	3598595	3599287	-	693	YALI0_E30569g	GO:0000398;GO:0005515;GO:0005634;GO:0005681;GO:0005686;GO:0006397;GO:0008380;GO:0030620	K11092	-	YALI0E30569p [Yarrowia lipolytica CLIB122]	YALI0_E30569g	YALI0E30569g	2912068
gene4620	181.424	260.825	102.023	0.391153	-1.3542	2.25107e-13	4.92335e-13	NC_006071.1	1449083	1450588	-	1506	YALI0_E11957g	GO:0005739	-	-	YALI0E11957p [Yarrowia lipolytica CLIB122]	YALI0_E11957g	YALI0E11957g	2912805
gene2521	399.333	581.261	217.404	0.37402	-1.41881	2.27854e-13	4.98174e-13	NC_006069.1	2139512	2139955	-	213	YALI0_C15323g	GO:0006412	K02913	-	mitochondrial 54S ribosomal protein YmL39 [Yarrowia lipolytica CLIB122]	YALI0_C15323g	YALI0C15323g	7009457
gene2905	268.928	368.659	169.196	0.45895	-1.12359	2.52023e-13	5.50453e-13	NC_006069.1	3231425	3233476	-	2052	YALI0_C24189g	-	-	-	YALI0C24189p [Yarrowia lipolytica CLIB122]	YALI0_C24189g	YALI0C24189g	2909583
gene6224	46.6913	77.5107	15.8719	0.20477	-2.28792	3.3284e-13	7.23276e-13	NC_006072.1	1685565	1687484	+	1920	YALI0_F12595g	GO:0005615;GO:0008081;GO:0016787	-	-	YALI0F12595p [Yarrowia lipolytica CLIB122]	YALI0_F12595g	YALI0F12595g	2908042
gene5610	863.142	1174.1	552.18	0.470299	-1.08835	3.71843e-13	8.07211e-13	NC_006071.1	4025304	4026143	+	840	YALI0_E33891g	GO:0005199;GO:0005618	-	-	YALI0E33891p [Yarrowia lipolytica CLIB122]	YALI0_E33891g	YALI0E33891g	2911473
gene144	271.074	375.467	166.682	0.443934	-1.17158	3.91822e-13	8.50294e-13	NC_006067.1	399107	400135	+	1029	YALI0_A03641g	-	-	-	YALI0A03641p [Yarrowia lipolytica CLIB122]	YALI0_A03641g	YALI0A03641g	2906247
gene2037	192.059	260.022	124.096	0.477253	-1.06717	5.11916e-13	1.10642e-12	NC_006069.1	525184	525597	-	414	YALI0_C03982g	GO:0000349;GO:0000398;GO:0000974;GO:0004842;GO:0006281;GO:0016567;GO:0061630;GO:0071006;GO:0071013	K10599	[EC:2.3.2.27]	YALI0C03982p [Yarrowia lipolytica CLIB122]	YALI0_C03982g	YALI0C03982g	2909677
gene4237	112.14	162.154	62.1257	0.383128	-1.3841	6.67437e-13	1.43723e-12	NC_006071.1	352502	354994	-	2493	YALI0_E03234g	GO:0005267;GO:0005887;GO:0006811;GO:0016020;GO:0016021;GO:0022841;GO:0030322;GO:0071805	K05389	-	YALI0E03234p [Yarrowia lipolytica CLIB122]	YALI0_E03234g	YALI0E03234g	2912137
gene6776	130.744	194.51	66.9778	0.344341	-1.53809	7.8788e-13	1.69261e-12	NC_006072.1	3231999	3232208	+	210	YALI0_F24981g	GO:0002098;GO:0005634;GO:0005737;GO:0005829;GO:0017183;GO:0046872	K15455	-	YALI0F24981p [Yarrowia lipolytica CLIB122]	YALI0_F24981g	YALI0F24981g	2908522
gene3648	48.3754	79.3887	17.3622	0.218698	-2.19299	8.3483e-13	1.79167e-12	NC_006070.1	2088591	2090658	+	1896	YALI0_D16907g	-	-	-	YALI0D16907p [Yarrowia lipolytica CLIB122]	YALI0_D16907g	YALI0D16907g	2910214
gene6736	68.3555	106.01	30.7005	0.289599	-1.78787	9.93594e-13	2.12743e-12	NC_006072.1	3147058	3148335	+	1278	YALI0_F24035g	GO:0016020;GO:0016021	-	-	YALI0F24035p [Yarrowia lipolytica CLIB122]	YALI0_F24035g	YALI0F24035g	2908733
gene4913	204.235	273.511	134.958	0.493427	-1.01909	1.04175e-12	2.22905e-12	NC_006071.1	2232477	2235029	+	2553	YALI0_E18744g	-	-	-	YALI0E18744p [Yarrowia lipolytica CLIB122]	YALI0_E18744g	YALI0E18744g	2911730
gene1270	311.923	419.26	204.586	0.487969	-1.03514	1.12937e-12	2.41411e-12	NC_006068.1	1396353	1399277	+	2925	YALI0_B10197g	GO:0005524;GO:0005739;GO:0006298;GO:0008094;GO:0030983;GO:0032300;GO:0043504	-	-	YALI0B10197p [Yarrowia lipolytica CLIB122]	YALI0_B10197g	YALI0B10197g	2906808
gene4305	185.774	262.127	109.42	0.417433	-1.26038	1.15555e-12	2.46925e-12	NC_006071.1	534587	535564	+	978	YALI0_E04741g	GO:0000172;GO:0000294;GO:0000466;GO:0042134	K14532	-	YALI0E04741p [Yarrowia lipolytica CLIB122]	YALI0_E04741g	YALI0E04741g	2912211
gene1639	128.958	182.503	75.414	0.413221	-1.27501	1.17013e-12	2.49791e-12	NC_006068.1	2415401	2416528	+	1128	YALI0_B18436g	GO:0003723;GO:0004000;GO:0006396;GO:0006400;GO:0043829	K15440	[EC:3.5.4.34]	YALI0B18436p [Yarrowia lipolytica CLIB122]	YALI0_B18436g	YALI0B18436g	2907375
gene3800	157.138	216.719	97.5564	0.450152	-1.15152	1.27324e-12	2.71532e-12	NC_006070.1	2580826	2582430	+	1605	YALI0_D20394g	GO:0000981;GO:0005634;GO:0006355;GO:0006357;GO:0008270	K19998	-	YALI0D20394p [Yarrowia lipolytica CLIB122]	YALI0_D20394g	YALI0D20394g	2911209
gene909	376.888	513.779	239.996	0.46712	-1.09814	2.75196e-12	5.81281e-12	NC_006068.1	246086	246961	+	876	YALI0_B01562g	GO:0003723;GO:0005737;GO:0035145;GO:1903259	K14294	-	YALI0B01562p [Yarrowia lipolytica CLIB122]	YALI0_B01562g	YALI0B01562g	2906703
gene5428	60.8409	95.4823	26.1994	0.274391	-1.8657	2.86216e-12	6.04358e-12	NC_006071.1	3559908	3560510	-	603	YALI0_E30151g	GO:0005737;GO:0008113;GO:0034599;GO:0036456;GO:0055114	K07304	[EC:1.8.4.11]	YALI0E30151p [Yarrowia lipolytica CLIB122]	YALI0_E30151g	YALI0E30151g	2911466
gene3969	143.988	217.03	70.9456	0.326893	-1.61311	3.12618e-12	6.59457e-12	NC_006070.1	3226095	3227309	-	1215	YALI0_D24365g	-	-	-	YALI0D24365p [Yarrowia lipolytica CLIB122]	YALI0_D24365g	YALI0D24365g	2910344
gene3479	189.905	254.892	124.919	0.490084	-1.0289	3.75025e-12	7.89286e-12	NC_006070.1	1586180	1587214	+	1035	YALI0_D12683g	-	-	-	YALI0D12683p [Yarrowia lipolytica CLIB122]	YALI0_D12683g	YALI0D12683g	2911256
gene5161	129.573	181.883	77.2638	0.424799	-1.23515	4.22697e-12	8.87001e-12	NC_006071.1	2874079	2875281	-	1203	YALI0_E24189g	-	-	-	YALI0E24189p [Yarrowia lipolytica CLIB122]	YALI0_E24189g	YALI0E24189g	2912538
gene6945	88.7798	131.003	46.5568	0.355388	-1.49253	5.74546e-12	1.20172e-11	NC_006072.1	3659202	3660299	+	1098	YALI0_F28765g	GO:0005737;GO:0008863;GO:0016491;GO:0016616;GO:0042183;GO:0051287;GO:0055114	K00122	[EC:1.17.1.9]	YALI0F28765p [Yarrowia lipolytica CLIB122]	YALI0_F28765g	YALI0F28765g	2908289
gene2860	170.867	231.549	110.185	0.475861	-1.07139	5.75732e-12	1.2038e-11	NC_006069.1	3111183	3112115	-	933	YALI0_C23210g	GO:0003824;GO:0004132;GO:0005737;GO:0006226;GO:0006231;GO:0008270;GO:0016787	K01493	[EC:3.5.4.12]	YALI0C23210p [Yarrowia lipolytica CLIB122]	YALI0_C23210g	YALI0C23210g	2909630
gene5731	172.71	233.693	111.726	0.478089	-1.06465	5.94691e-12	1.24223e-11	NC_006072.1	239146	240315	-	1170	YALI0_F01540g	GO:0004843;GO:0006508	K13717	[EC:3.4.19.12]	YALI0F01540p [Yarrowia lipolytica CLIB122]	YALI0_F01540g	YALI0F01540g	2908056
gene5630	121.994	171.903	72.0848	0.419333	-1.25383	8.90875e-12	1.85188e-11	NC_006071.1	4079309	4081102	-	1794	YALI0_E34331g	GO:0004190;GO:0005576;GO:0006508;GO:0009277;GO:0030163;GO:0031505	-	-	YALI0E34331p [Yarrowia lipolytica CLIB122]	YALI0_E34331g	YALI0E34331g	2912367
gene1985	34.2399	58.5319	9.94798	0.169958	-2.55675	1.08349e-11	2.24645e-11	NC_006069.1	389353	390270	+	918	YALI0_C02827g	-	-	-	YALI0C02827p [Yarrowia lipolytica CLIB122]	YALI0_C02827g	YALI0C02827g	2909073
gene6149	41.9861	68.8218	15.1503	0.220139	-2.18352	2.86473e-11	5.86567e-11	NC_006072.1	1453960	1456404	+	2445	YALI0_F10901g	GO:0007155	-	-	YALI0F10901p [Yarrowia lipolytica CLIB122]	YALI0_F10901g	YALI0F10901g	2907801
gene255	167.385	244.656	90.1142	0.36833	-1.44093	3.33572e-11	6.81264e-11	NC_006067.1	636192	637532	+	1341	YALI0_A06589g	GO:0000026;GO:0000030;GO:0000032;GO:0005794;GO:0006486;GO:0006487;GO:0006493;GO:0016020;GO:0097502	K10967	[EC:2.4.1.-]	YALI0A06589p [Yarrowia lipolytica CLIB122]	YALI0_A06589g	YALI0A06589g	2905891
gene3486	222.985	300.652	145.318	0.483343	-1.04888	4.26565e-11	8.68422e-11	NC_006070.1	1597102	1597806	+	705	YALI0_D12837g	GO:0002098;GO:0005634;GO:0005737;GO:0008168;GO:0016300;GO:0030488;GO:0032259	K15444	[EC:2.1.1.229]	YALI0D12837p [Yarrowia lipolytica CLIB122]	YALI0_D12837g	YALI0D12837g	2911263
gene1044	131.881	185.458	78.3048	0.422224	-1.24392	8.19091e-11	1.65338e-10	NC_006068.1	645330	647138	+	1374	YALI0_B04774g	GO:0001510;GO:0005634;GO:0008168;GO:0009452;GO:0036261;GO:0071164	K14292	[EC:2.1.1.-]	YALI0B04774p [Yarrowia lipolytica CLIB122]	YALI0_B04774g	YALI0B04774g	2906917
gene1879	154.82	209.188	100.451	0.480195	-1.05831	8.53535e-11	1.72154e-10	NC_006069.1	34375	35229	-	855	YALI0_C00319g	GO:0004032;GO:0005829;GO:0008106;GO:0016491;GO:0055114	-	-	YALI0C00319p [Yarrowia lipolytica CLIB122]	YALI0_C00319g	YALI0C00319g	2909197
gene4444	73.2929	109.288	37.2977	0.341279	-1.55098	8.53661e-11	1.72154e-10	NC_006071.1	941685	942635	-	951	YALI0_E08052g	-	-	-	YALI0E08052p [Yarrowia lipolytica CLIB122]	YALI0_E08052g	YALI0E08052g	2912474
gene2597	26.8697	47.0797	6.65971	0.141456	-2.82158	8.56419e-11	1.72656e-10	NC_006069.1	2422899	2424326	+	1428	YALI0_C17215g	-	-	-	YALI0C17215p [Yarrowia lipolytica CLIB122]	YALI0_C17215g	YALI0C17215g	2910089
gene579	161.47	216.889	106.051	0.488964	-1.0322	9.83483e-11	1.97775e-10	NC_006067.1	1544412	1545089	-	678	YALI0_A15059g	GO:0000287;GO:0003676;GO:0004523;GO:0043137;GO:0090502	K03469	[EC:3.1.26.4]	YALI0A15059p [Yarrowia lipolytica CLIB122]	YALI0_A15059g	YALI0A15059g	2906075
gene5087	369.24	528.311	210.169	0.397813	-1.32984	1.44826e-10	2.89517e-10	NC_006071.1	2678436	2680469	-	2034	YALI0_E22671g	GO:0004518;GO:0005634;GO:0005737;GO:0006281;GO:0008409;GO:0017108;GO:0048256;GO:0070914;GO:0090305;GO:1904162	K15339	[EC:3.1.-.-]	YALI0E22671p [Yarrowia lipolytica CLIB122]	YALI0_E22671g	YALI0E22671g	2912995
gene3079	130.336	178.996	81.6767	0.456306	-1.13193	1.62529e-10	3.23897e-10	NC_006070.1	490839	492554	+	1716	YALI0_D03938g	-	-	-	YALI0D03938p [Yarrowia lipolytica CLIB122]	YALI0_D03938g	YALI0D03938g	2910594
gene3832	141.839	192.761	90.9178	0.471661	-1.08418	1.73296e-10	3.44818e-10	NC_006070.1	2675379	2676092	-	714	YALI0_D21164g	GO:0003676;GO:0008270;GO:0046872	-	-	YALI0D21164p [Yarrowia lipolytica CLIB122]	YALI0_D21164g	YALI0D21164g	2910281
gene3203	113.883	158.729	69.0375	0.434939	-1.20111	2.36905e-10	4.68049e-10	NC_006070.1	848511	849089	+	579	YALI0_D06655g	-	-	-	YALI0D06655p [Yarrowia lipolytica CLIB122]	YALI0_D06655g	YALI0D06655g	2910498
gene5058	155.28	210.122	100.437	0.477993	-1.06494	3.83493e-10	7.53482e-10	NC_006071.1	2593404	2594687	-	1284	YALI0_E22000g	GO:0016763;GO:0019988;GO:0043399	K15463	[EC:2.4.2.-]	YALI0E22000p [Yarrowia lipolytica CLIB122]	YALI0_E22000g	YALI0E22000g	2911965
gene2923	35.764	58.9962	12.5318	0.212417	-2.23503	4.09809e-10	8.04696e-10	NC_006070.1	18199	22080	-	3882	YALI0_D00198g	-	-	-	YALI0D00198p [Yarrowia lipolytica CLIB122]	YALI0_D00198g	YALI0D00198g	2910373
gene4034	783.174	1082.7	483.649	0.446707	-1.1626	4.85931e-10	9.51547e-10	NC_006070.1	3460721	3462823	+	2103	YALI0_D26015g	GO:0000166;GO:0000278;GO:0000922;GO:0004672;GO:0004674;GO:0005515;GO:0005524;GO:0005634;GO:0005737;GO:0005816;GO:0006468;GO:0016301;GO:0016310;GO:0016740;GO:0032465;GO:1902542	K06660	[EC:2.7.11.21]	YALI0D26015p [Yarrowia lipolytica CLIB122]	YALI0_D26015g	YALI0D26015g	2910807
gene2376	472.081	652.001	292.161	0.4481	-1.15811	6.6872e-10	1.30352e-09	NC_006069.1	1622112	1622981	+	870	YALI0_C11781g	GO:0005515	-	-	YALI0C11781p [Yarrowia lipolytica CLIB122]	YALI0_C11781g	YALI0C11781g	2909268
gene5953	425.329	572.448	278.211	0.486002	-1.04097	6.76317e-10	1.31753e-09	NC_006072.1	948435	951725	-	3291	YALI0_F06402g	GO:0000278;GO:0000779;GO:0000799;GO:0003682;GO:0005634;GO:0007049;GO:0007076;GO:0010032;GO:0030261;GO:0042393;GO:0051301;GO:0051304	K06677	-	YALI0F06402p [Yarrowia lipolytica CLIB122]	YALI0_F06402g	YALI0F06402g	2908385
gene4222	142.036	191.16	92.912	0.486043	-1.04084	7.23725e-10	1.40689e-09	NC_006071.1	315550	316089	+	540	YALI0_E02860g	GO:0005515	-	-	YALI0E02860p [Yarrowia lipolytica CLIB122]	YALI0_E02860g	YALI0E02860g	2912120
gene6441	41.608	66.5768	16.6393	0.249926	-2.00043	7.81705e-10	1.51547e-09	NC_006072.1	2326976	2328355	+	1380	YALI0_F17446g	GO:0005887;GO:0016020;GO:0016021;GO:0055085;GO:0071627	-	-	YALI0F17446p [Yarrowia lipolytica CLIB122]	YALI0_F17446g	YALI0F17446g	2908875
gene6462	117.705	175.233	60.1758	0.343403	-1.54202	9.83661e-10	1.89954e-09	NC_006072.1	2387574	2388005	-	432	YALI0_F17897g	GO:0008080	-	-	YALI0F17897p [Yarrowia lipolytica CLIB122]	YALI0_F17897g	YALI0F17897g	7009630
gene2125	189.182	260.972	117.391	0.449824	-1.15257	1.09421e-09	2.10983e-09	NC_006069.1	778522	779823	+	1302	YALI0_C06061g	GO:0000118;GO:0004407;GO:0005634;GO:0006325;GO:0016575;GO:0016787;GO:0032041;GO:0045944;GO:0046872;GO:0070932;GO:0070933	K11483	[EC:3.5.1.98]	YALI0C06061p [Yarrowia lipolytica CLIB122]	YALI0_C06061g	YALI0C06061g	2909232
gene3406	296.556	402.46	190.652	0.473716	-1.07791	1.30156e-09	2.50139e-09	NC_006070.1	1384489	1386243	-	1755	YALI0_D11044g	-	-	-	YALI0D11044p [Yarrowia lipolytica CLIB122]	YALI0_D11044g	YALI0D11044g	2910723
gene6538	181.363	250.286	112.439	0.449242	-1.15443	1.32601e-09	2.54761e-09	NC_006072.1	2604698	2605740	-	993	YALI0_F19558g	GO:0000776;GO:0005515;GO:0007094;GO:0033597;GO:0043130;GO:1990298	K02180	-	YALI0F19558p [Yarrowia lipolytica CLIB122]	YALI0_F19558g	YALI0F19558g	2907677
gene3009	77.036	111.513	42.5588	0.381648	-1.38969	1.60054e-09	3.06496e-09	NC_006070.1	241534	242691	+	1158	YALI0_D02145g	GO:0005634;GO:0005737;GO:0016575;GO:0017136;GO:0070403	K11121	[EC:2.3.1.286]	YALI0D02145p [Yarrowia lipolytica CLIB122]	YALI0_D02145g	YALI0D02145g	2910515
gene1972	50.0489	77.1443	22.9534	0.297539	-1.74885	1.79667e-09	3.42825e-09	NC_006069.1	352316	353995	-	1680	YALI0_C02519g	-	-	-	YALI0C02519p [Yarrowia lipolytica CLIB122]	YALI0_C02519g	YALI0C02519g	2909089
gene2777	53.1093	81.0547	25.1639	0.310456	-1.68754	1.99833e-09	3.80512e-09	NC_006069.1	2862878	2864449	+	1572	YALI0_C21406g	GO:0005886;GO:0015355;GO:0016020;GO:0016021;GO:0022857;GO:0035879;GO:0055085	K08178	-	YALI0C21406p [Yarrowia lipolytica CLIB122]	YALI0_C21406g	YALI0C21406g	2909845
gene3592	100.706	140.016	61.3956	0.438489	-1.18939	3.08734e-09	5.84408e-09	NC_006070.1	1897418	1897750	-	333	YALI0_D15466g	-	-	-	YALI0D15466p [Yarrowia lipolytica CLIB122]	YALI0_D15466g	YALI0D15466g	2910762
gene923	107.381	148.583	66.1786	0.4454	-1.16683	3.60434e-09	6.81268e-09	NC_006068.1	279835	281415	+	1581	YALI0_B01848g	GO:0004497;GO:0005506;GO:0016491;GO:0016705;GO:0016712;GO:0020037;GO:0046872;GO:0055114	-	-	YALI0B01848p [Yarrowia lipolytica CLIB122]	YALI0_B01848g	YALI0B01848g	2907511
gene2610	31.113	51.4981	10.7278	0.208315	-2.26316	3.6168e-09	6.83421e-09	NC_006069.1	2461194	2462360	-	1167	YALI0_C17589g	GO:0005515	-	-	YALI0C17589p [Yarrowia lipolytica CLIB122]	YALI0_C17589g	YALI0C17589g	2910076
gene2831	28.6177	47.9763	9.25912	0.192993	-2.37338	4.19628e-09	7.90591e-09	NC_006069.1	3015965	3017683	-	1719	YALI0_C22594g	GO:0005887;GO:0016020;GO:0016021;GO:0022857;GO:0031224;GO:0055085	-	-	YALI0C22594p [Yarrowia lipolytica CLIB122]	YALI0_C22594g	YALI0C22594g	2909665
gene3925	56.6998	85.0399	28.3597	0.333487	-1.5843	5.68781e-09	1.0669e-08	NC_006070.1	3040725	3041307	-	429	YALI0_D23386g	GO:0006497;GO:0006914;GO:0016236;GO:0019777;GO:0032446	K17888	-	YALI0D23386p [Yarrowia lipolytica CLIB122]	YALI0_D23386g	YALI0D23386g	7009527
gene4994	113.511	154.598	72.423	0.468459	-1.09401	6.92775e-09	1.29343e-08	NC_006071.1	2436891	2438027	-	1137	YALI0_E20559g	-	-	-	YALI0E20559p [Yarrowia lipolytica CLIB122]	YALI0_E20559g	YALI0E20559g	2911823
gene1882	96.7793	134.478	59.0811	0.439338	-1.1866	7.27197e-09	1.35652e-08	NC_006069.1	44131	45579	+	1449	YALI0_C00385g	GO:0005515	-	-	YALI0C00385p [Yarrowia lipolytica CLIB122]	YALI0_C00385g	YALI0C00385g	2909200
gene6243	91.7779	127.751	55.8048	0.436825	-1.19487	1.16553e-08	2.16225e-08	NC_006072.1	1753087	1753543	-	411	YALI0_F13068g	GO:0000172;GO:0005655;GO:0006379;GO:0008033	K14528	[EC:3.1.26.5]	YALI0F13068p [Yarrowia lipolytica CLIB122]	YALI0_F13068g	YALI0F13068g	7009619
gene4717	56.2461	83.6862	28.806	0.344214	-1.53862	1.4037e-08	2.5921e-08	NC_006071.1	1701577	1702287	-	711	YALI0_E14168g	-	-	-	YALI0E14168p [Yarrowia lipolytica CLIB122]	YALI0_E14168g	YALI0E14168g	2911502
gene5673	102.2	139.78	64.6201	0.4623	-1.1131	2.06806e-08	3.7992e-08	NC_006072.1	28005	28637	-	633	YALI0_F00242g	GO:0000492;GO:0005634;GO:0030515;GO:0046872	K14853	-	YALI0F00242p [Yarrowia lipolytica CLIB122]	YALI0_F00242g	YALI0F00242g	2908546
gene767	43.9662	67.6453	20.2871	0.299904	-1.73743	2.26283e-08	4.1523e-08	NC_006067.1	2100852	2102501	-	1650	YALI0_A19558g	GO:0006865;GO:0016020;GO:0016021;GO:0022857;GO:0055085	-	-	YALI0A19558p [Yarrowia lipolytica CLIB122]	YALI0_A19558g	YALI0A19558g	2906322
gene2589	26.0595	43.6154	8.50353	0.194966	-2.3587	2.65349e-08	4.85666e-08	NC_006069.1	2409608	2410543	+	936	YALI0_C17017g	-	-	-	YALI0C17017p [Yarrowia lipolytica CLIB122]	YALI0_C17017g	YALI0C17017g	2910081
gene5378	82.1879	115.203	49.1727	0.426835	-1.22825	4.15424e-08	7.55392e-08	NC_006071.1	3436979	3437773	-	795	YALI0_E29029g	-	-	-	YALI0E29029p [Yarrowia lipolytica CLIB122]	YALI0_E29029g	YALI0E29029g	2911875
gene1267	195.27	267.336	123.204	0.460858	-1.11761	1.16278e-07	2.08017e-07	NC_006068.1	1388855	1389511	+	657	YALI0_B10131g	-	-	-	YALI0B10131p [Yarrowia lipolytica CLIB122]	YALI0_B10131g	YALI0B10131g	2906842
gene1123	53.492	78.4672	28.5167	0.363422	-1.46028	1.29084e-07	2.30476e-07	NC_006068.1	896859	898547	-	1689	YALI0_B06710g	GO:0005886;GO:0016020;GO:0016021;GO:0071467	-	-	YALI0B06710p [Yarrowia lipolytica CLIB122]	YALI0_B06710g	YALI0B06710g	2907596
gene6843	60.0507	88.6768	31.4245	0.354371	-1.49667	1.32176e-07	2.35866e-07	NC_006072.1	3388960	3389325	+	366	YALI0_F26477g	-	-	-	YALI0F26477p [Yarrowia lipolytica CLIB122]	YALI0_F26477g	YALI0F26477g	2908349
gene5177	137.637	200.253	75.0202	0.374627	-1.41647	1.49129e-07	2.65602e-07	NC_006071.1	2923872	2925533	-	1662	YALI0_E24541g	GO:0005634	-	-	YALI0E24541p [Yarrowia lipolytica CLIB122]	YALI0_E24541g	YALI0E24541g	2912556
gene5662	22.0458	37.8317	6.2599	0.165467	-2.59538	1.81326e-07	3.21605e-07	NC_006071.1	4193407	4195506	-	2100	YALI0_E35112g	GO:0000293;GO:0005886;GO:0006826;GO:0006879;GO:0015677;GO:0016020;GO:0016021;GO:0016491;GO:0055114	-	-	YALI0E35112p [Yarrowia lipolytica CLIB122]	YALI0_E35112g	YALI0E35112g	2912283
gene5409	18.7207	32.2516	5.18968	0.160912	-2.63565	2.94656e-07	5.1732e-07	NC_006071.1	3520848	3522722	-	1875	YALI0_E29711g	GO:0015333;GO:0016020;GO:0016021;GO:0022857;GO:0035672;GO:0035673;GO:0042886;GO:0055085;GO:1902600;GO:1904680	-	-	YALI0E29711p [Yarrowia lipolytica CLIB122]	YALI0_E29711g	YALI0E29711g	2911938
gene86	277.289	387.102	167.475	0.432637	-1.20877	3.27102e-07	5.72876e-07	NC_006067.1	268909	269346	-	438	YALI0_A02178g	GO:0003676;GO:0004526;GO:0005634;GO:0008033;GO:0090501;GO:0090502	K14526	[EC:3.1.26.5]	YALI0A02178p [Yarrowia lipolytica CLIB122]	YALI0_A02178g	YALI0A02178g	2906574
gene3367	67.0531	94.2328	39.8733	0.423136	-1.24081	4.18254e-07	7.2834e-07	NC_006070.1	1290300	1291511	-	696	YALI0_D10234g	GO:0005737;GO:0008168;GO:0016279;GO:0016740;GO:0018022;GO:0032259	K21804	[EC:2.1.1.-]	YALI0D10234p [Yarrowia lipolytica CLIB122]	YALI0_D10234g	YALI0D10234g	2911001
gene3305	90.9786	130.967	50.99	0.389335	-1.36092	5.39817e-07	9.33694e-07	NC_006070.1	1136590	1138866	+	2277	YALI0_D08888g	GO:0003688;GO:0003690;GO:0003697;GO:0005634;GO:0006260;GO:0006270;GO:0031298	K10736	-	YALI0D08888p [Yarrowia lipolytica CLIB122]	YALI0_D08888g	YALI0D08888g	2910679
gene3318	19.527	33.1482	5.90569	0.17816	-2.48876	5.59592e-07	9.67115e-07	NC_006070.1	1165034	1166248	+	1215	YALI0_D09185g	-	-	-	YALI0D09185p [Yarrowia lipolytica CLIB122]	YALI0_D09185g	YALI0D09185g	2910834
gene3044	23.2365	37.9366	8.53644	0.225019	-2.15188	1.06801e-06	1.82466e-06	NC_006070.1	378993	380345	-	1353	YALI0_D02981g	GO:0004252;GO:0005615;GO:0006508;GO:0008233;GO:0008236;GO:0016787	-	-	YALI0D02981p [Yarrowia lipolytica CLIB122]	YALI0_D02981g	YALI0D02981g	2910551
gene3865	23.6669	38.4635	8.87042	0.230619	-2.11642	1.22113e-06	2.08017e-06	NC_006070.1	2795029	2797089	-	2061	YALI0_D22000g	GO:0000329;GO:0005887;GO:0006855;GO:0016020;GO:0016021;GO:0055085	-	-	YALI0D22000p [Yarrowia lipolytica CLIB122]	YALI0_D22000g	YALI0D22000g	2910194
gene771	333.129	459.348	206.911	0.450445	-1.15058	2.75693e-06	4.60949e-06	NC_006067.1	2112864	2114768	+	1905	YALI0_A19646g	-	-	-	YALI0A19646p [Yarrowia lipolytica CLIB122]	YALI0_A19646g	YALI0A19646g	2906311
gene2954	58.7868	83.9961	33.5776	0.399752	-1.32282	2.85421e-06	4.76593e-06	NC_006070.1	91843	93512	-	1434	YALI0_D00869g	-	-	-	YALI0D00869p [Yarrowia lipolytica CLIB122]	YALI0_D00869g	YALI0D00869g	2910408
gene7139	20.0973	33.167	7.0275	0.211882	-2.23867	3.02312e-06	5.04272e-06	NC_002659.1	39051	40292	+	1242	cob-i1	-	K00412	-	COB-i1 protein (mitochondrion) [Yarrowia lipolytica]	YalifMp27	-	802618
gene639	15.0494	26.0312	4.06765	0.15626	-2.67798	3.76678e-06	6.26366e-06	NC_006067.1	1694705	1695337	+	633	YALI0_A16511g	-	-	-	YALI0A16511p [Yarrowia lipolytica CLIB122]	YALI0_A16511g	YALI0A16511g	2906191
gene1704	13.5955	23.858	3.33297	0.1397	-2.83959	4.45802e-06	7.39394e-06	NC_006068.1	2623687	2624802	-	1116	YALI0_B19976g	GO:0005737;GO:0008863;GO:0016491;GO:0016616;GO:0042183;GO:0051287;GO:0055114	K00122	[EC:1.17.1.9]	YALI0B19976p [Yarrowia lipolytica CLIB122]	YALI0_B19976g	YALI0B19976g	2907004
gene2776	28.0509	43.5306	12.5712	0.288789	-1.79191	4.47927e-06	7.42725e-06	NC_006069.1	2861981	2862562	+	582	YALI0_C21384g	-	-	-	YALI0C21384p [Yarrowia lipolytica CLIB122]	YALI0_C21384g	YALI0C21384g	2909844
gene4360	23.6791	37.3388	10.0194	0.268337	-1.89788	9.49079e-06	1.55205e-05	NC_006071.1	684290	688129	+	3840	YALI0_E05973g	GO:0000166;GO:0000770;GO:0005524;GO:0016020;GO:0016021;GO:0016887;GO:0042626;GO:0055085	K05658	[EC:7.6.2.2]	YALI0E05973p [Yarrowia lipolytica CLIB122]	YALI0_E05973g	YALI0E05973g	2912340
gene933	18.5283	30.3835	6.67306	0.219628	-2.18687	1.05104e-05	1.71225e-05	NC_006068.1	302335	304983	-	2649	YALI0_B02090g	GO:0005887;GO:0016020;GO:0016021;GO:0035672;GO:0035673;GO:0055085	-	-	YALI0B02090p [Yarrowia lipolytica CLIB122]	YALI0_B02090g	YALI0B02090g	2906647
gene608	8.56687	16.0248	1.10891	0.0691998	-3.85309	1.23117e-05	1.99607e-05	NC_006067.1	1614529	1614900	+	372	YALI0_A15752g	-	-	-	YALI0A15752p [Yarrowia lipolytica CLIB122]	YALI0_A15752g	YALI0A15752g	2906307
gene4604	38.0302	55.3511	20.7094	0.374146	-1.41833	1.41551e-05	2.28998e-05	NC_006071.1	1420702	1421646	+	945	YALI0_E11583g	-	-	-	YALI0E11583p [Yarrowia lipolytica CLIB122]	YALI0_E11583g	YALI0E11583g	2912785
gene4861	50.1107	70.2282	29.9932	0.427081	-1.22742	1.4169e-05	2.2914e-05	NC_006071.1	2067442	2070093	+	2652	YALI0_E17589g	GO:0005887;GO:0016020;GO:0016021;GO:0035672;GO:0035673;GO:0055085	-	-	YALI0E17589p [Yarrowia lipolytica CLIB122]	YALI0_E17589g	YALI0E17589g	2911676
gene2873	40.8935	58.8545	22.9325	0.389648	-1.35976	1.60561e-05	2.5881e-05	NC_006069.1	3141770	3144262	-	2493	YALI0_C23452g	-	-	-	YALI0C23452p [Yarrowia lipolytica CLIB122]	YALI0_C23452g	YALI0C23452g	2909612
gene2480	23.0782	36.1308	10.0256	0.277481	-1.84954	1.89675e-05	3.04819e-05	NC_006069.1	1982504	1983301	-	798	YALI0_C14388g	-	-	-	YALI0C14388p [Yarrowia lipolytica CLIB122]	YALI0_C14388g	YALI0C14388g	2910057
gene3768	19.5551	31.3412	7.76907	0.247887	-2.01225	2.49858e-05	3.99536e-05	NC_006070.1	2485855	2487930	+	2076	YALI0_D19602g	GO:0003824	-	-	YALI0D19602p [Yarrowia lipolytica CLIB122]	YALI0_D19602g	YALI0D19602g	2911173
gene5794	31.1942	46.1543	16.2341	0.351736	-1.50743	3.42247e-05	5.43613e-05	NC_006072.1	418568	420607	+	2040	YALI0_F02959g	GO:0005887;GO:0006855;GO:0010509;GO:0015203;GO:0016020;GO:0016021;GO:0055085;GO:1902047	-	-	YALI0F02959p [Yarrowia lipolytica CLIB122]	YALI0_F02959g	YALI0F02959g	2907765
gene5399	27.7078	41.7484	13.6672	0.32737	-1.611	3.43092e-05	5.4482e-05	NC_006071.1	3493589	3493885	-	297	YALI0_E29491g	-	-	-	YALI0E29491p [Yarrowia lipolytica CLIB122]	YALI0_E29491g	YALI0E29491g	2911928
gene6566	47.0564	65.6564	28.4564	0.433414	-1.20618	3.53273e-05	5.60294e-05	NC_006072.1	2686313	2690293	+	3981	YALI0_F20174g	GO:0000166;GO:0005524;GO:0016020;GO:0016021;GO:0016887;GO:0042626;GO:0055085	K05658	[EC:7.6.2.2]	YALI0F20174p [Yarrowia lipolytica CLIB122]	YALI0_F20174g	YALI0F20174g	2908054
gene1504	23.3723	36.0161	10.7285	0.29788	-1.7472	4.22376e-05	6.66927e-05	NC_006068.1	2052932	2054368	-	1437	YALI0_B15466g	GO:0005515	-	-	YALI0B15466p [Yarrowia lipolytica CLIB122]	YALI0_B15466g	YALI0B15466g	2907355
gene4816	44.3648	62.1097	26.6199	0.428596	-1.22231	4.77841e-05	7.52468e-05	NC_006071.1	1958398	1959042	-	645	YALI0_E16533g	GO:0000750;GO:0000772;GO:0005186;GO:0005576;GO:0007618	K11234	-	YALI0E16533p [Yarrowia lipolytica CLIB122]	YALI0_E16533g	YALI0E16533g	2911600
gene146	48.0231	66.4681	29.578	0.444995	-1.16814	4.87849e-05	7.6785e-05	NC_006067.1	404000	404746	+	747	YALI0_A03685g	-	-	-	YALI0A03685p [Yarrowia lipolytica CLIB122]	YALI0_A03685g	YALI0A03685g	2906280
gene1006	43.0323	60.1518	25.9128	0.430791	-1.21494	6.334e-05	9.91589e-05	NC_006068.1	525877	526440	+	564	YALI0_B03916g	GO:0005737;GO:0008113;GO:0034599;GO:0036456;GO:0055114	K07304	[EC:1.8.4.11]	YALI0B03916p [Yarrowia lipolytica CLIB122]	YALI0_B03916g	YALI0B03916g	2907105
gene6187	32.8624	47.6214	18.1035	0.380155	-1.39534	7.23281e-05	0.000112872	NC_006072.1	1547532	1548233	+	702	YALI0_F11737g	-	-	-	YALI0F11737p [Yarrowia lipolytica CLIB122]	YALI0_F11737g	YALI0F11737g	2908634
gene7121	10.0643	18.2717	1.85694	0.101629	-3.29862	9.29762e-05	0.000144497	NC_002659.1	28364	28921	+	558	cox3-i3	-	-	-	COX3-i1 (mitochondrion) [Yarrowia lipolytica]	YalifMp15	-	802610
gene1190	25.1199	37.7001	12.5398	0.332621	-1.58805	0.000107447	0.000166584	NC_006068.1	1160322	1161461	-	1140	YALI0_B08360g	-	-	-	YALI0B08360p [Yarrowia lipolytica CLIB122]	YALI0_B08360g	YALI0B08360g	2907118
gene6391	15.5142	25.1097	5.91881	0.235718	-2.08487	0.000119322	0.000184725	NC_006072.1	2184199	2185212	-	1014	YALI0_F16335g	GO:0000706;GO:0000737;GO:0003677;GO:0003824;GO:0005524;GO:0005694;GO:0006259;GO:0007131;GO:0016889;GO:0042138	K10878	-	YALI0F16335p [Yarrowia lipolytica CLIB122]	YALI0_F16335g	YALI0F16335g	2907817
gene1987	32.865	47.2318	18.4982	0.391647	-1.35237	0.000121765	0.000188417	NC_006069.1	393665	394105	-	252	YALI0_C02871g	-	K18167	-	YALI0C02871p [Yarrowia lipolytica CLIB122]	YALI0_C02871g	YALI0C02871g	2909076
gene6939	13.7027	22.5965	4.809	0.212821	-2.23229	0.000128167	0.000198228	NC_006072.1	3634080	3634847	+	768	YALI0_F28611g	-	-	-	YALI0F28611p [Yarrowia lipolytica CLIB122]	YALI0_F28611g	YALI0F28611g	2908134
gene904	39.0238	54.4261	23.6214	0.434008	-1.2042	0.000180101	0.000275891	NC_006068.1	239488	241101	+	1614	YALI0_B01430g	-	-	-	YALI0B01430p [Yarrowia lipolytica CLIB122]	YALI0_B01430g	YALI0B01430g	2907576
gene4049	53.2246	74.3555	32.0938	0.431627	-1.21214	0.000241596	0.000367811	NC_006070.1	3505141	3505500	+	360	YALI0_D26323g	-	-	-	YALI0D26323p [Yarrowia lipolytica CLIB122]	YALI0_D26323g	YALI0D26323g	2911275
gene3074	208.436	284.785	132.086	0.46381	-1.1084	0.00030786	0.000466809	NC_006070.1	478748	479191	+	444	YALI0_D03784g	-	-	-	YALI0D03784p [Yarrowia lipolytica CLIB122]	YALI0_D03784g	YALI0D03784g	2910589
gene2982	14.5967	23.2815	5.91191	0.253932	-1.97749	0.000365502	0.000551216	NC_006070.1	178546	178815	+	270	YALI0_D01507g	-	-	-	YALI0D01507p [Yarrowia lipolytica CLIB122]	YALI0_D01507g	YALI0D01507g	2910462
gene7132	23.9547	42.3641	5.54524	0.130895	-2.93352	0.000408438	0.000614812	NC_002659.1	33838	35604	+	1767	nd5-i1	-	-	-	ND5-i1 protein (mitochondrion) [Yarrowia lipolytica]	YalifMp22	-	802612
gene130	3.88297	7.76595	0	0	-Inf	0.000467787	0.000700371	NC_006067.1	370183	371325	+	1143	YALI0_A03201g	GO:0005515	-	-	YALI0A03201p [Yarrowia lipolytica CLIB122]	YALI0_A03201g	YALI0A03201g	2906452
gene449	16.3691	25.3686	7.36949	0.290496	-1.78341	0.000558227	0.000832089	NC_006067.1	1183677	1187441	+	3765	YALI0_A11473g	GO:0000166;GO:0005524;GO:0016020;GO:0016021;GO:0016887;GO:0042626;GO:0055085	K05658	[EC:7.6.2.2]	YALI0A11473p [Yarrowia lipolytica CLIB122]	YALI0_A11473g	YALI0A11473g	2906177
gene3651	15.1995	23.7458	6.65326	0.280187	-1.83554	0.000609022	0.000904861	NC_006070.1	2093720	2094640	-	921	YALI0_D16962g	-	-	-	YALI0D16962p [Yarrowia lipolytica CLIB122]	YALI0_D16962g	YALI0D16962g	2910217
gene1426	15.7936	24.5656	7.0215	0.285826	-1.80679	0.000619455	0.000919297	NC_006068.1	1850233	1851612	-	1380	YALI0_B13794g	GO:0005887;GO:0008519;GO:0015696;GO:0016020;GO:0016021;GO:0019740;GO:0072488	-	-	YALI0B13794p [Yarrowia lipolytica CLIB122]	YALI0_B13794g	YALI0B13794g	2907056
gene7119	131.277	195.309	67.2453	0.344302	-1.53825	0.00062518	0.000927384	NC_002659.1	26692	27459	+	768	atp6	-	K02126	-	ATP6 protein (mitochondrion) [Yarrowia lipolytica]	YalifMp13	-	802623
gene2298	13.256	20.9542	5.55792	0.265242	-1.91462	0.000992875	0.00145663	NC_006069.1	1367195	1367563	+	369	YALI0_C09966g	-	-	-	YALI0C09966p [Yarrowia lipolytica CLIB122]	YALI0_C09966g	YALI0C09966g	2909451
gene4840	7.95637	13.7011	2.2116	0.161418	-2.63113	0.00114341	0.00167136	NC_006071.1	2018626	2019210	-	585	YALI0_E17083g	-	-	-	YALI0E17083p [Yarrowia lipolytica CLIB122]	YALI0_E17083g	YALI0E17083g	2911649
gene7135	104.449	148.627	60.2706	0.405515	-1.30217	0.00123619	0.00180164	NC_002659.1	39051	45791	+	1158	cob	-	K00412	-	COB protein (mitochondrion) [Yarrowia lipolytica]	YalifMp23	-	802619
gene681	8.45133	14.3039	2.59874	0.18168	-2.46053	0.00137536	0.00199721	NC_006067.1	1811188	1811823	+	636	YALI0_A17556g	-	-	-	YALI0A17556p [Yarrowia lipolytica CLIB122]	YALI0_A17556g	YALI0A17556g	2906310
gene3788	9.58324	15.8395	3.32697	0.210042	-2.25125	0.00149134	0.0021627	NC_006070.1	2534854	2536362	+	1509	YALI0_D20108g	GO:0005886;GO:0015355;GO:0016020;GO:0016021;GO:0022857;GO:0035879;GO:0055085	K08178	-	YALI0D20108p [Yarrowia lipolytica CLIB122]	YALI0_D20108g	YALI0D20108g	2911198
gene6562	3.61276	7.22553	0	0	-Inf	0.00167501	0.0024203	NC_006072.1	2677229	2677408	+	180	YALI0_F20086g	-	-	-	YALI0F20086p [Yarrowia lipolytica CLIB122]	YALI0_F20086g	YALI0F20086g	2908050
gene5134	17.8949	26.5431	9.24667	0.348365	-1.52133	0.0016768	0.00242234	NC_006071.1	2792959	2794320	-	1362	YALI0_E23650g	-	-	-	YALI0E23650p [Yarrowia lipolytica CLIB122]	YALI0_E23650g	YALI0E23650g	2912678
gene2185	8.30907	14.0399	2.57827	0.183639	-2.44505	0.00169562	0.00244733	NC_006069.1	973918	975495	-	1578	YALI0_C07348g	GO:0005887;GO:0016020;GO:0016021;GO:0022857;GO:0031224;GO:0055085	-	-	YALI0C07348p [Yarrowia lipolytica CLIB122]	YALI0_C07348g	YALI0C07348g	2910026
gene6375	30.144	41.102	19.186	0.466789	-1.09916	0.00248923	0.00355834	NC_006072.1	2150130	2150879	+	750	YALI0_F15961g	-	-	-	YALI0F15961p [Yarrowia lipolytica CLIB122]	YALI0_F15961g	YALI0F15961g	2908616
gene7118	16.6164	26.6103	6.62258	0.248873	-2.00652	0.00270841	0.00386649	NC_002659.1	26072	26218	+	147	atp8	-	K02125	-	ATP8 protein (mitochondrion) [Yarrowia lipolytica]	YalifMp12	-	802621
gene2347	34.5581	46.1445	22.9717	0.49782	-1.0063	0.00272533	0.00388805	NC_006069.1	1528369	1530198	+	1830	YALI0_C11077g	GO:0005515	-	-	YALI0C11077p [Yarrowia lipolytica CLIB122]	YALI0_C11077g	YALI0C11077g	2909139
gene12	24.9505	34.3899	15.511	0.451034	-1.14869	0.00433931	0.00609842	NC_006067.1	42638	43495	-	858	YALI0_A00374g	-	-	-	YALI0A00374p [Yarrowia lipolytica CLIB122]	YALI0_A00374g	YALI0A00374g	2905998
gene3749	13.2346	20.5304	5.93882	0.28927	-1.78951	0.00440297	0.00618652	NC_006070.1	2428222	2429322	+	1101	YALI0_D19184g	GO:0006629;GO:0016787	-	-	YALI0D19184p [Yarrowia lipolytica CLIB122]	YALI0_D19184g	YALI0D19184g	2910291
gene2556	15.8711	23.2454	8.49685	0.365529	-1.45194	0.00472618	0.00662037	NC_006069.1	2291544	2293400	-	1857	YALI0_C16225g	GO:0005887;GO:0016020;GO:0016021;GO:0044718;GO:0055085	-	-	YALI0C16225p [Yarrowia lipolytica CLIB122]	YALI0_C16225g	YALI0C16225g	2909255
gene6926	10.2893	16.1496	4.42898	0.274248	-1.86645	0.00499263	0.00697837	NC_006072.1	3603294	3604151	-	858	YALI0_F28325g	-	-	-	YALI0F28325p [Yarrowia lipolytica CLIB122]	YALI0_F28325g	YALI0F28325g	2908860
gene348	10.2879	16.1333	4.44255	0.275365	-1.86058	0.00499486	0.00697997	NC_006067.1	866697	866945	+	249	YALI0_A08866g	-	-	-	YALI0A08866p [Yarrowia lipolytica CLIB122]	YALI0_A08866g	YALI0A08866g	2906110
gene3357	10.2434	16.0648	4.42209	0.275266	-1.8611	0.00507028	0.00708073	NC_006070.1	1270529	1272043	-	1515	YALI0_D10043g	GO:0005887;GO:0016020;GO:0016021;GO:0022857;GO:0031224;GO:0055085	-	-	YALI0D10043p [Yarrowia lipolytica CLIB122]	YALI0_D10043g	YALI0D10043g	2910992
gene490	19.4868	27.5181	11.4554	0.416284	-1.26436	0.00592978	0.00822377	NC_006067.1	1303228	1305045	+	1818	YALI0_A12573g	GO:0009395;GO:0016788	K01078	[EC:3.1.3.2]	YALI0A12573p [Yarrowia lipolytica CLIB122]	YALI0_A12573g	YALI0A12573g	2906361
gene2530	8.98539	14.2702	3.70053	0.259318	-1.94721	0.00644061	0.00889186	NC_006069.1	2162814	2164313	-	1500	YALI0_C15488g	GO:0005886;GO:0005887;GO:0015355;GO:0016020;GO:0016021;GO:0035879;GO:0055085	K08178	-	YALI0C15488p [Yarrowia lipolytica CLIB122]	YALI0_C15488g	YALI0C15488g	2909410
gene7128	83.2118	115.78	50.6434	0.43741	-1.19294	0.00682515	0.00940657	NC_002659.1	32582	33310	+	729	cox2	-	K02261	-	cytochrome c oxidase subunit 2 (mitochondrion) [Yarrowia lipolytica]	YalifMp18	-	802608
gene7115	7.25081	11.8967	2.60496	0.218966	-2.19122	0.00725571	0.00997641	NC_002659.1	13151	15715	+	1263	cox1-i2	-	-	-	COX1-i2 protein (mitochondrion) [Yarrowia lipolytica]	YalifMp09	-	802605
gene4888	2.52177	5.04354	0	0	-Inf	0.0078471	0.0107435	NC_006071.1	2148777	2149875	-	972	YALI0_E18161g	GO:0000122;GO:0000790;GO:0000981;GO:0003676;GO:0008270;GO:0043565;GO:0045944;GO:0046872	-	-	YALI0E18161p [Yarrowia lipolytica CLIB122]	YALI0_E18161g	YALI0E18161g	2911702
gene5388	6.59489	10.965	2.22472	0.202892	-2.30121	0.00797467	0.0109135	NC_006071.1	3464463	3465995	+	1533	YALI0_E29271g	GO:0003677;GO:0005634;GO:0006355	-	-	YALI0E29271p [Yarrowia lipolytica CLIB122]	YALI0_E29271g	YALI0E29271g	2912728
gene6335	9.33591	14.5977	4.0741	0.279091	-1.84119	0.00814993	0.0111486	NC_006072.1	2022388	2022639	-	252	YALI0_F15103g	-	-	-	YALI0F15103p [Yarrowia lipolytica CLIB122]	YALI0_F15103g	YALI0F15103g	2908923
gene4240	14.912	22.035	7.78909	0.353487	-1.50027	0.00853415	0.0116494	NC_006071.1	361259	361864	-	606	YALI0_E03300g	-	-	-	YALI0E03300p [Yarrowia lipolytica CLIB122]	YALI0_E03300g	YALI0E03300g	2912140
gene4399	21.868	34.1503	9.58575	0.280693	-1.83294	0.00900469	0.0122526	NC_006071.1	789249	790349	+	1101	YALI0_E06875g	-	-	-	YALI0E06875p [Yarrowia lipolytica CLIB122]	YALI0_E06875g	YALI0E06875g	2912414
gene631	3.30841	6.24281	0.374012	0.0599108	-4.06104	0.00915437	0.0124457	NC_006067.1	1671959	1672477	-	519	YALI0_A16313g	-	-	-	YALI0A16313p [Yarrowia lipolytica CLIB122]	YALI0_A16313g	YALI0A16313g	2905751
gene3644	20.8138	28.7138	12.9138	0.449743	-1.15283	0.00927212	0.0126004	NC_006070.1	2076093	2077112	+	1020	YALI0_D16819g	-	-	-	YALI0D16819p [Yarrowia lipolytica CLIB122]	YALI0_D16819g	YALI0D16819g	2910211
gene5869	16.4184	23.2377	9.5991	0.413082	-1.2755	0.0109224	0.0147712	NC_006072.1	704188	704853	+	666	YALI0_F04598g	-	-	-	YALI0F04598p [Yarrowia lipolytica CLIB122]	YALI0_F04598g	YALI0F04598g	2908899
gene1536	16.4025	23.1992	9.60577	0.414055	-1.2721	0.0109571	0.014815	NC_006068.1	2135895	2136731	+	837	YALI0_B16192g	GO:0016491;GO:0019594;GO:0050085;GO:0050661;GO:0050664;GO:0051289;GO:0055114	K17742	[EC:1.1.1.289]	YALI0B16192p [Yarrowia lipolytica CLIB122]	YALI0_B16192g	YALI0B16192g	2906628
gene3300	4.58448	8.05359	1.11536	0.138493	-2.85212	0.011156	0.0150775	NC_006070.1	1125967	1127031	-	1065	YALI0_D08800g	-	-	-	YALI0D08800p [Yarrowia lipolytica CLIB122]	YALI0_D08800g	YALI0D08800g	2910675
gene4648	3.18826	6.00252	0.374012	0.0623092	-4.00441	0.0117904	0.0158814	NC_006071.1	1525328	1525903	-	576	YALI0_E12529g	-	-	-	YALI0E12529p [Yarrowia lipolytica CLIB122]	YALI0_E12529g	YALI0E12529g	2912838
gene159	24.614	32.9542	16.2737	0.493828	-1.01792	0.0118114	0.0159064	NC_006067.1	445772	446332	-	561	YALI0_A03993g	GO:0005515	-	-	YALI0A03993p [Yarrowia lipolytica CLIB122]	YALI0_A03993g	YALI0A03993g	2906182
gene5983	16.7434	23.5317	9.9551	0.423051	-1.2411	0.012338	0.0165988	NC_006072.1	1029491	1031908	+	2418	YALI0_F07040g	GO:0000293;GO:0005886;GO:0006826;GO:0006879;GO:0015677;GO:0016020;GO:0016021;GO:0016491;GO:0055114	-	-	YALI0F07040p [Yarrowia lipolytica CLIB122]	YALI0_F07040g	YALI0F07040g	2908461
gene1733	16.8192	24.0646	9.57375	0.397835	-1.32976	0.0137008	0.018366	NC_006068.1	2717834	2718853	+	1020	YALI0_B20614g	GO:0016020;GO:0016021	-	-	YALI0B20614p [Yarrowia lipolytica CLIB122]	YALI0_B20614g	YALI0B20614g	2907370
gene5826	18.2664	25.0885	11.4443	0.456156	-1.1324	0.0166648	0.0222232	NC_006072.1	541545	543137	+	1593	YALI0_F03663g	GO:0005506;GO:0016705;GO:0020037;GO:0055114	K10437	[EC:1.14.14.54]	YALI0F03663p [Yarrowia lipolytica CLIB122]	YALI0_F03663g	YALI0F03663g	2907724
gene6191	3.66503	6.59538	0.734679	0.111393	-3.16627	0.017513	0.0232962	NC_006072.1	1561599	1563806	-	2208	YALI0_F11825g	GO:0000293;GO:0005886;GO:0006826;GO:0006879;GO:0015677;GO:0016020;GO:0016021;GO:0016491;GO:0055114	-	-	YALI0F11825p [Yarrowia lipolytica CLIB122]	YALI0_F11825g	YALI0F11825g	2908638
gene6028	19.5064	26.4395	12.5732	0.475545	-1.07235	0.017672	0.0234932	NC_006072.1	1141567	1142619	+	1053	YALI0_F08085g	-	-	-	YALI0F08085p [Yarrowia lipolytica CLIB122]	YALI0_F08085g	YALI0F08085g	2908533
gene3504	11.1757	16.4135	5.93793	0.361772	-1.46685	0.0176924	0.0235153	NC_006070.1	1654046	1655542	+	1497	YALI0_D13266g	-	-	-	YALI0D13266p [Yarrowia lipolytica CLIB122]	YALI0_D13266g	YALI0D13266g	2910819
gene6284	7.66517	12.0038	3.32652	0.277122	-1.85141	0.0178582	0.0237161	NC_006072.1	1888485	1890080	+	1596	YALI0_F13981g	GO:0005887;GO:0006855;GO:0016020;GO:0016021;GO:0055085	-	-	YALI0F13981p [Yarrowia lipolytica CLIB122]	YALI0_F13981g	YALI0F13981g	2908182
gene3753	16.3202	22.6675	9.97288	0.439963	-1.18455	0.0181945	0.0241477	NC_006070.1	2434728	2436059	+	1332	YALI0_D19272g	GO:0008080	-	-	YALI0D19272p [Yarrowia lipolytica CLIB122]	YALI0_D19272g	YALI0D19272g	2911158
gene1730	12.7827	18.1832	7.38216	0.405988	-1.30049	0.023382	0.0307969	NC_006068.1	2706004	2707182	+	1179	YALI0_B20526g	GO:0004190;GO:0005576;GO:0006508;GO:0008233;GO:0009277;GO:0016787;GO:0030163;GO:0031505	-	-	YALI0B20526p [Yarrowia lipolytica CLIB122]	YALI0_B20526g	YALI0B20526g	2907058
gene3822	13.6057	19.0947	8.11662	0.425072	-1.23422	0.0260022	0.0341149	NC_006070.1	2650601	2651569	+	969	YALI0_D20900g	GO:0016020;GO:0016021	-	-	YALI0D20900p [Yarrowia lipolytica CLIB122]	YALI0_D20900g	YALI0D20900g	2910315
gene1035	13.1262	18.5105	7.74193	0.418245	-1.25758	0.026421	0.034636	NC_006068.1	622279	622785	-	507	YALI0_B04554g	-	-	-	YALI0B04554p [Yarrowia lipolytica CLIB122]	YALI0_B04554g	YALI0B04554g	2906692
gene2949	2.72851	5.08968	0.367339	0.0721733	-3.79239	0.0269176	0.0352511	NC_006070.1	78452	79759	-	1308	YALI0_D00759g	GO:0005385;GO:0005886;GO:0016020;GO:0016021;GO:0030001;GO:0046873;GO:0055085;GO:0071577	-	-	YALI0D00759p [Yarrowia lipolytica CLIB122]	YALI0_D00759g	YALI0D00759g	2910403
gene754	6.70044	10.4484	2.95251	0.282581	-1.82327	0.0297008	0.0386841	NC_006067.1	2069946	2071313	+	1368	YALI0_A19228g	GO:0005887;GO:0008519;GO:0015696;GO:0016020;GO:0016021;GO:0019740;GO:0072488	K03320	-	YALI0A19228p [Yarrowia lipolytica CLIB122]	YALI0_A19228g	YALI0A19228g	2906029
gene6811	12.5263	17.6701	7.38239	0.417789	-1.25915	0.0305932	0.0397805	NC_006072.1	3313759	3315138	-	1380	YALI0_F25773g	GO:0009395;GO:0016788	K01078	[EC:3.1.3.2]	YALI0F25773p [Yarrowia lipolytica CLIB122]	YALI0_F25773g	YALI0F25773g	2907687
gene6123	12.49	19.0621	5.91791	0.310455	-1.68755	0.0342035	0.0442776	NC_006072.1	1392359	1394662	-	2304	YALI0_F10241g	GO:0005887;GO:0016020;GO:0016021;GO:0035672;GO:0035673;GO:0055085	-	-	YALI0F10241p [Yarrowia lipolytica CLIB122]	YALI0_F10241g	YALI0F10241g	2909005
gene7116	6.52991	10.1195	2.94028	0.290555	-1.78312	0.0358022	0.0462632	NC_002659.1	13151	14350	+	1200	cox1-i1	-	-	-	COX1-i1 protein (mitochondrion) [Yarrowia lipolytica]	YalifMp10	-	802602
gene934	1.79642	3.59285	0	0	-Inf	0.0364793	0.0471001	NC_006068.1	308549	309142	+	594	YALI0_B02112g	-	-	-	YALI0B02112p [Yarrowia lipolytica CLIB122]	YALI0_B02112g	YALI0B02112g	2906666
gene1892	1.78019	3.56039	0	0	-Inf	0.0370408	0.0477675	NC_006069.1	77694	77942	+	249	YALI0_C00583g	-	-	-	YALI0C00583p [Yarrowia lipolytica CLIB122]	YALI0_C00583g	YALI0C00583g	2909181
gene1679	9.44539	13.7198	5.17101	0.376902	-1.40774	0.0380797	0.0490776	NC_006068.1	2551458	2552819	-	1362	YALI0_B19316g	GO:0004252;GO:0005615;GO:0006508;GO:0008233;GO:0008236;GO:0016787	-	-	YALI0B19316p [Yarrowia lipolytica CLIB122]	YALI0_B19316g	YALI0B19316g	2907412
gene4461	5.44391	8.67623	2.2116	0.254904	-1.97197	0.0388401	0.0499974	NC_006071.1	990164	990613	+	450	YALI0_E08392g	-	-	-	YALI0E08392p [Yarrowia lipolytica CLIB122]	YALI0_E08392g	YALI0E08392g	7009544
gene6481	29.2519	39.3123	19.1915	0.488181	-1.03451	0.0397482	0.0510741	NC_006072.1	2432432	2432740	-	309	YALI0_F18304g	-	-	-	YALI0F18304p [Yarrowia lipolytica CLIB122]	YALI0_F18304g	YALI0F18304g	2907806
gene3988	21.1027	29.1806	13.0248	0.446352	-1.16375	0.0406624	0.0522279	NC_006070.1	3309927	3310196	+	270	YALI0_D24849g	-	-	-	YALI0D24849p [Yarrowia lipolytica CLIB122]	YALI0_D24849g	YALI0D24849g	7009530
gene3687	15.3061	20.6052	10.0069	0.48565	-1.04201	0.0433414	0.0555133	NC_006070.1	2185289	2187199	-	1911	YALI0_D17754g	GO:0004499;GO:0050660;GO:0050661;GO:0055114	-	-	YALI0D17754p [Yarrowia lipolytica CLIB122]	YALI0_D17754g	YALI0D17754g	2911313
gene5519	6.88628	10.4458	3.32674	0.318476	-1.65074	0.0434843	0.0556631	NC_006071.1	3799705	3799851	-	147	YALI0_E31977g	-	-	-	YALI0E31977p [Yarrowia lipolytica CLIB122]	YALI0_E31977g	YALI0E31977g	2912954
gene1609	8.86074	12.898	4.82346	0.373969	-1.41901	0.0440309	0.0563066	NC_006068.1	2324143	2325723	+	1581	YALI0_B17776g	GO:0005887;GO:0006855;GO:0016020;GO:0016021;GO:0055085	-	-	YALI0B17776p [Yarrowia lipolytica CLIB122]	YALI0_B17776g	YALI0B17776g	2907101
