# Supplementary material for: Metabolome and Transcriptome Profiling Reveal Carbon Metabolic Flux Changes in Yarrowia lipolytica Cells to Rapamycin
Source: J Fungi (Basel). 2022 Sep 6;8(9):939. doi: 10.3390/jof8090939 (PMC9504542; doi:10.3390/jof8090939)
Supplement: Supplementary file 1 [file jof-08-00939-s001.zip › Table S6.xlsx]

## Sheet: Sheet1
Category	GO.ID	Term	Up	Down	DEG	Total	Pvalue	FDR	Up_Gene	Down_Gene
BP	GO:0034470	ncRNA processing	2	149	151	231	9.4e-25	4.11156e-21	gene3569(YALI0_D14916g),gene4947(YALI0_E19481g)	gene1002(YALI0_B03784g),gene1016(YALI0_B04136g),gene1043(YALI0_B04752g),gene1197(YALI0_B08514g),gene1223(YALI0_B09119g),gene1264(YALI0_B10065g),gene1273(YALI0_B10263g),gene1288(YALI0_B10582g),gene1361(YALI0_B12276g),gene1363(YALI0_B12320g),gene1377(YALI0_B12628g),gene1411(YALI0_B13442g),gene1470(YALI0_B14751g),gene154(YALI0_A03905g),gene1557(YALI0_B16654g),gene1633(YALI0_B18304g),gene1634(YALI0_B…
BP	GO:0034660	ncRNA metabolic process	3	169	172	279	7.9e-24	1.72773e-20	gene3569(YALI0_D14916g),gene4947(YALI0_E19481g),gene6817(YALI0_F25905g)	gene1002(YALI0_B03784g),gene1016(YALI0_B04136g),gene1043(YALI0_B04752g),gene1048(YALI0_B04851g),gene1092(YALI0_B05918g),gene1197(YALI0_B08514g),gene1223(YALI0_B09119g),gene1264(YALI0_B10065g),gene1273(YALI0_B10263g),gene1288(YALI0_B10582g),gene1361(YALI0_B12276g),gene1363(YALI0_B12320g),gene1377(YALI0_B12628g),gene1411(YALI0_B13442g),gene1470(YALI0_B14751g),gene154(YALI0_A03905g),gene1557(YALI0_B…
CC	GO:0000313	organellar ribosome	0	50	50	51	2.3e-23	2.51505e-20	-	gene1101(YALI0_B06116g),gene114(YALI0_A02849g),gene1177(YALI0_B08074g),gene1220(YALI0_B09075g),gene1284(YALI0_B10494g),gene1306(YALI0_B11000g),gene1482(YALI0_B14993g),gene1607(YALI0_B17732g),gene1826(YALI0_B22594g),gene2334(YALI0_C10802g),gene2451(YALI0_C13706g),gene2565(YALI0_C16478g),gene2633(YALI0_C18139g),gene2766(YALI0_C21109g),gene2994(YALI0_D01804g),gene3078(YALI0_D03916g),gene3283(YALI0_D…
CC	GO:0005761	mitochondrial ribosome	0	50	50	51	2.3e-23	2.51505e-20	-	gene1101(YALI0_B06116g),gene114(YALI0_A02849g),gene1177(YALI0_B08074g),gene1220(YALI0_B09075g),gene1284(YALI0_B10494g),gene1306(YALI0_B11000g),gene1482(YALI0_B14993g),gene1607(YALI0_B17732g),gene1826(YALI0_B22594g),gene2334(YALI0_C10802g),gene2451(YALI0_C13706g),gene2565(YALI0_C16478g),gene2633(YALI0_C18139g),gene2766(YALI0_C21109g),gene2994(YALI0_D01804g),gene3078(YALI0_D03916g),gene3283(YALI0_D…
CC	GO:0005739	mitochondrion	42	221	263	503	3.1e-21	2.71188e-18	gene1215(YALI0_B08965g),gene1244(YALI0_B09625g),gene1245(YALI0_B09647g),gene1280(YALI0_B10406g),gene1661(YALI0_B18898g),gene1945(YALI0_C01859g),gene2324(YALI0_C10604g),gene2339(YALI0_C10901g),gene2497(YALI0_C14806g),gene2571(YALI0_C16621g),gene2786(YALI0_C21582g),gene2888(YALI0_C23815g),gene2972(YALI0_D01265g),gene304(YALI0_A07733g),gene3295(YALI0_D08690g),gene3352(YALI0_D09933g),gene389(YALI0_A0…	gene1092(YALI0_B05918g),gene1101(YALI0_B06116g),gene1118(YALI0_B06578g),gene114(YALI0_A02849g),gene1177(YALI0_B08074g),gene1198(YALI0_B08536g),gene1220(YALI0_B09075g),gene1270(YALI0_B10197g),gene1274(YALI0_B10274g),gene1284(YALI0_B10494g),gene1294(YALI0_B10736g),gene1305(YALI0_B10978g),gene1306(YALI0_B11000g),gene1391(YALI0_B12958g),gene1402(YALI0_B13222g),gene1482(YALI0_B14993g),gene1513(YALI0_B…
CC	GO:0005759	mitochondrial matrix	4	69	73	97	1.2e-17	8.748e-15	gene1245(YALI0_B09647g),gene2786(YALI0_C21582g),gene3295(YALI0_D08690g),gene5886(YALI0_F05038g)	gene1101(YALI0_B06116g),gene114(YALI0_A02849g),gene1177(YALI0_B08074g),gene1220(YALI0_B09075g),gene1284(YALI0_B10494g),gene1306(YALI0_B11000g),gene1482(YALI0_B14993g),gene1607(YALI0_B17732g),gene1826(YALI0_B22594g),gene2334(YALI0_C10802g),gene2451(YALI0_C13706g),gene2565(YALI0_C16478g),gene2633(YALI0_C18139g),gene2645(YALI0_C18425g),gene265(YALI0_A06765g),gene2651(YALI0_C18513g),gene2766(YALI0_C2…
CC	GO:0000315	organellar large ribosomal subunit	0	32	32	33	8.6e-15	4.70205e-12	-	gene114(YALI0_A02849g),gene1177(YALI0_B08074g),gene1220(YALI0_B09075g),gene1306(YALI0_B11000g),gene1607(YALI0_B17732g),gene2334(YALI0_C10802g),gene2565(YALI0_C16478g),gene2633(YALI0_C18139g),gene2766(YALI0_C21109g),gene3358(YALI0_D10065g),gene3462(YALI0_D12320g),gene3476(YALI0_D12606g),gene3483(YALI0_D12771g),gene3484(YALI0_D12793g),gene3869(YALI0_D22088g),gene3914(YALI0_D23155g),gene4178(YALI0_E…
CC	GO:0005762	mitochondrial large ribosomal subunit	0	32	32	33	8.6e-15	4.70205e-12	-	gene114(YALI0_A02849g),gene1177(YALI0_B08074g),gene1220(YALI0_B09075g),gene1306(YALI0_B11000g),gene1607(YALI0_B17732g),gene2334(YALI0_C10802g),gene2565(YALI0_C16478g),gene2633(YALI0_C18139g),gene2766(YALI0_C21109g),gene3358(YALI0_D10065g),gene3462(YALI0_D12320g),gene3476(YALI0_D12606g),gene3483(YALI0_D12771g),gene3484(YALI0_D12793g),gene3869(YALI0_D22088g),gene3914(YALI0_D23155g),gene4178(YALI0_E…
BP	GO:0006399	tRNA metabolic process	2	83	85	129	1.4e-14	6.804e-12	gene3569(YALI0_D14916g),gene4947(YALI0_E19481g)	gene1043(YALI0_B04752g),gene1048(YALI0_B04851g),gene1092(YALI0_B05918g),gene1197(YALI0_B08514g),gene1273(YALI0_B10263g),gene1288(YALI0_B10582g),gene1377(YALI0_B12628g),gene1470(YALI0_B14751g),gene1633(YALI0_B18304g),gene1639(YALI0_B18436g),gene1647(YALI0_B18612g),gene1688(YALI0_B19558g),gene1776(YALI0_B21516g),gene2029(YALI0_C03784g),gene2333(YALI0_C10780g),gene2418(YALI0_C12749g),gene2460(YALI0_…
BP	GO:0008033	tRNA processing	2	60	62	84	1.9e-14	8.3106e-12	gene3569(YALI0_D14916g),gene4947(YALI0_E19481g)	gene1043(YALI0_B04752g),gene1273(YALI0_B10263g),gene1288(YALI0_B10582g),gene1377(YALI0_B12628g),gene1470(YALI0_B14751g),gene1633(YALI0_B18304g),gene1639(YALI0_B18436g),gene1647(YALI0_B18612g),gene1688(YALI0_B19558g),gene1776(YALI0_B21516g),gene2029(YALI0_C03784g),gene2418(YALI0_C12749g),gene2460(YALI0_C13882g),gene2631(YALI0_C18095g),gene2870(YALI0_C23386g),gene3150(YALI0_D05489g),gene3261(YALI0_…
BP	GO:0006396	RNA processing	7	186	193	376	2.5e-14	9.8415e-12	gene1258(YALI0_B09977g),gene1752(YALI0_B20988g),gene2526(YALI0_C15400g),gene3569(YALI0_D14916g),gene4947(YALI0_E19481g),gene5133(YALI0_E23628g),gene6164(YALI0_F11253g)	gene1002(YALI0_B03784g),gene1016(YALI0_B04136g),gene1043(YALI0_B04752g),gene1044(YALI0_B04774g),gene1079(YALI0_B05632g),gene1197(YALI0_B08514g),gene1223(YALI0_B09119g),gene1264(YALI0_B10065g),gene1273(YALI0_B10263g),gene1288(YALI0_B10582g),gene1361(YALI0_B12276g),gene1363(YALI0_B12320g),gene1377(YALI0_B12628g),gene1402(YALI0_B13222g),gene1411(YALI0_B13442g),gene1422(YALI0_B13706g),gene1429(YALI0_…
BP	GO:0006400	tRNA modification	1	47	48	59	2.7e-14	9.8415e-12	gene4947(YALI0_E19481g)	gene1273(YALI0_B10263g),gene1288(YALI0_B10582g),gene1377(YALI0_B12628g),gene1470(YALI0_B14751g),gene1633(YALI0_B18304g),gene1639(YALI0_B18436g),gene1647(YALI0_B18612g),gene1688(YALI0_B19558g),gene1776(YALI0_B21516g),gene2418(YALI0_C12749g),gene2460(YALI0_C13882g),gene2631(YALI0_C18095g),gene2870(YALI0_C23386g),gene3150(YALI0_D05489g),gene3261(YALI0_D07920g),gene3403(YALI0_D10989g),gene3486(YALI0_…
BP	GO:0042254	ribosome biogenesis	2	119	121	208	3.5e-14	1.17762e-11	gene1262(YALI0_B10021g),gene3497(YALI0_D13104g)	gene1002(YALI0_B03784g),gene1016(YALI0_B04136g),gene1043(YALI0_B04752g),gene1197(YALI0_B08514g),gene1223(YALI0_B09119g),gene1264(YALI0_B10065g),gene1271(YALI0_B10219g),gene1344(YALI0_B11880g),gene1361(YALI0_B12276g),gene1363(YALI0_B12320g),gene1411(YALI0_B13442g),gene1470(YALI0_B14751g),gene154(YALI0_A03905g),gene1557(YALI0_B16654g),gene1568(YALI0_B16896g),gene1634(YALI0_B18326g),gene1778(YALI0_B…
BP	GO:0009451	RNA modification	3	59	62	85	4.7e-14	1.46841e-11	gene11(YALI0_A00369g),gene4947(YALI0_E19481g),gene990(YALI0_B03498g)	gene1044(YALI0_B04774g),gene1271(YALI0_B10219g),gene1273(YALI0_B10263g),gene1288(YALI0_B10582g),gene1377(YALI0_B12628g),gene1470(YALI0_B14751g),gene1633(YALI0_B18304g),gene1639(YALI0_B18436g),gene1647(YALI0_B18612g),gene1688(YALI0_B19558g),gene1776(YALI0_B21516g),gene2418(YALI0_C12749g),gene2460(YALI0_C13882g),gene2631(YALI0_C18095g),gene2870(YALI0_C23386g),gene2987(YALI0_D01628g),gene3150(YALI0_…
CC	GO:0044429	mitochondrial part	15	143	158	298	2.1e-13	6.1236e-11	gene1215(YALI0_B08965g),gene1245(YALI0_B09647g),gene2497(YALI0_C14806g),gene2786(YALI0_C21582g),gene2888(YALI0_C23815g),gene3295(YALI0_D08690g),gene4127(YALI0_E00814g),gene5243(YALI0_E26081g),gene5655(YALI0_E34881g),gene5886(YALI0_F05038g),gene6010(YALI0_F07667g),gene6545(YALI0_F19712g),gene6603(YALI0_F20988g),gene6753(YALI0_F24431g),gene6901(YALI0_F27753g)	gene1101(YALI0_B06116g),gene114(YALI0_A02849g),gene1177(YALI0_B08074g),gene1220(YALI0_B09075g),gene1274(YALI0_B10274g),gene1284(YALI0_B10494g),gene1305(YALI0_B10978g),gene1306(YALI0_B11000g),gene1391(YALI0_B12958g),gene1402(YALI0_B13222g),gene1482(YALI0_B14993g),gene1513(YALI0_B15664g),gene1522(YALI0_B15884g),gene1530(YALI0_B16060g),gene1607(YALI0_B17732g),gene1646(YALI0_B18590g),gene1692(YALI0_B…
BP	GO:0006364	rRNA processing	0	90	90	144	2.6e-13	7.10775e-11	-	gene1002(YALI0_B03784g),gene1016(YALI0_B04136g),gene1043(YALI0_B04752g),gene1197(YALI0_B08514g),gene1223(YALI0_B09119g),gene1264(YALI0_B10065g),gene1361(YALI0_B12276g),gene1363(YALI0_B12320g),gene1411(YALI0_B13442g),gene1470(YALI0_B14751g),gene154(YALI0_A03905g),gene1557(YALI0_B16654g),gene1634(YALI0_B18326g),gene1778(YALI0_B21538g),gene1825(YALI0_B22572g),gene2029(YALI0_C03784g),gene2047(YALI0_C…
BP	GO:0016072	rRNA metabolic process	1	94	95	156	5.4e-13	1.38939e-10	gene6817(YALI0_F25905g)	gene1002(YALI0_B03784g),gene1016(YALI0_B04136g),gene1043(YALI0_B04752g),gene1197(YALI0_B08514g),gene1223(YALI0_B09119g),gene1264(YALI0_B10065g),gene1361(YALI0_B12276g),gene1363(YALI0_B12320g),gene1411(YALI0_B13442g),gene1470(YALI0_B14751g),gene154(YALI0_A03905g),gene1557(YALI0_B16654g),gene1634(YALI0_B18326g),gene1778(YALI0_B21538g),gene1825(YALI0_B22572g),gene2029(YALI0_C03784g),gene2047(YALI0_C…
CC	GO:0005730	nucleolus	1	98	99	166	9.8e-13	2.3814e-10	gene2591(YALI0_C17061g)	gene1002(YALI0_B03784g),gene1016(YALI0_B04136g),gene1043(YALI0_B04752g),gene1048(YALI0_B04851g),gene1264(YALI0_B10065g),gene1344(YALI0_B11880g),gene1349(YALI0_B11968g),gene1361(YALI0_B12276g),gene1363(YALI0_B12320g),gene1411(YALI0_B13442g),gene1470(YALI0_B14751g),gene149(YALI0_A03773g),gene154(YALI0_A03905g),gene1557(YALI0_B16654g),gene1568(YALI0_B16896g),gene1634(YALI0_B18326g),gene1778(YALI0_B2…
BP	GO:0140053	mitochondrial gene expression	0	34	34	39	3.6e-12	8.28758e-10	-	gene1092(YALI0_B05918g),gene1306(YALI0_B11000g),gene1482(YALI0_B14993g),gene1797(YALI0_B21978g),gene2333(YALI0_C10780g),gene2451(YALI0_C13706g),gene2633(YALI0_C18139g),gene2637(YALI0_C18227g),gene2645(YALI0_C18425g),gene265(YALI0_A06765g),gene2653(YALI0_C18557g),gene3232(YALI0_D07326g),gene3283(YALI0_D08448g),gene3476(YALI0_D12606g),gene369(YALI0_A09427g),gene3784(YALI0_D20020g),gene3936(YALI0_D2…
BP	GO:0032543	mitochondrial translation	0	30	30	35	1.8e-10	3.9366e-08	-	gene1092(YALI0_B05918g),gene1306(YALI0_B11000g),gene1482(YALI0_B14993g),gene1797(YALI0_B21978g),gene2333(YALI0_C10780g),gene2451(YALI0_C13706g),gene2633(YALI0_C18139g),gene2637(YALI0_C18227g),gene2645(YALI0_C18425g),gene265(YALI0_A06765g),gene2653(YALI0_C18557g),gene3232(YALI0_D07326g),gene3283(YALI0_D08448g),gene3476(YALI0_D12606g),gene369(YALI0_A09427g),gene3784(YALI0_D20020g),gene3936(YALI0_D2…
CC	GO:0000314	organellar small ribosomal subunit	0	18	18	18	2.3e-09	4.57282e-07	-	gene1101(YALI0_B06116g),gene1284(YALI0_B10494g),gene1482(YALI0_B14993g),gene1826(YALI0_B22594g),gene2451(YALI0_C13706g),gene2994(YALI0_D01804g),gene3078(YALI0_D03916g),gene3283(YALI0_D08448g),gene3284(YALI0_D08470g),gene3649(YALI0_D16929g),gene3851(YALI0_D21626g),gene4100(YALI0_E00220g),gene4517(YALI0_E09691g),gene4715(YALI0_E14124g),gene526(YALI0_A13541g),gene5439(YALI0_E30371g),gene6101(YALI0_F…
CC	GO:0005763	mitochondrial small ribosomal subunit	0	18	18	18	2.3e-09	4.57282e-07	-	gene1101(YALI0_B06116g),gene1284(YALI0_B10494g),gene1482(YALI0_B14993g),gene1826(YALI0_B22594g),gene2451(YALI0_C13706g),gene2994(YALI0_D01804g),gene3078(YALI0_D03916g),gene3283(YALI0_D08448g),gene3284(YALI0_D08470g),gene3649(YALI0_D16929g),gene3851(YALI0_D21626g),gene4100(YALI0_E00220g),gene4517(YALI0_E09691g),gene4715(YALI0_E14124g),gene526(YALI0_A13541g),gene5439(YALI0_E30371g),gene6101(YALI0_F…
BP	GO:0022613	ribonucleoprotein complex biogenesis	4	129	133	268	7.5e-09	1.4263e-06	gene1262(YALI0_B10021g),gene1752(YALI0_B20988g),gene3497(YALI0_D13104g),gene5511(YALI0_E31823g)	gene1002(YALI0_B03784g),gene1016(YALI0_B04136g),gene1043(YALI0_B04752g),gene1197(YALI0_B08514g),gene1223(YALI0_B09119g),gene1264(YALI0_B10065g),gene1271(YALI0_B10219g),gene1344(YALI0_B11880g),gene1361(YALI0_B12276g),gene1363(YALI0_B12320g),gene1411(YALI0_B13442g),gene1422(YALI0_B13706g),gene1470(YALI0_B14751g),gene154(YALI0_A03905g),gene1557(YALI0_B16654g),gene1568(YALI0_B16896g),gene1634(YALI0_B…
BP	GO:0016054	organic acid catabolic process	41	9	50	78	1.8e-08	3.14928e-06	gene1244(YALI0_B09625g),gene1245(YALI0_B09647g),gene1280(YALI0_B10406g),gene1537(YALI0_B16214g),gene1793(YALI0_B21846g),gene1822(YALI0_B22506g),gene1824(YALI0_B22550g),gene1927(YALI0_C01419g),gene1945(YALI0_C01859g),gene2057(YALI0_C04433g),gene2656(YALI0_C18645g),gene2890(YALI0_C23859g),gene2922(YALI0_D00176g),gene3295(YALI0_D08690g),gene3886(YALI0_D22484g),gene389(YALI0_A09856g),gene3984(YALI0_D…	gene1198(YALI0_B08536g),gene1704(YALI0_B19976g),gene2214(YALI0_C08074g),gene3023(YALI0_D02497g),gene3181(YALI0_D06215g),gene4262(YALI0_E03806g),gene6044(YALI0_F08415g),gene6945(YALI0_F28765g),gene965(YALI0_B02852g)
BP	GO:0046395	carboxylic acid catabolic process	41	9	50	78	1.8e-08	3.14928e-06	gene1244(YALI0_B09625g),gene1245(YALI0_B09647g),gene1280(YALI0_B10406g),gene1537(YALI0_B16214g),gene1793(YALI0_B21846g),gene1822(YALI0_B22506g),gene1824(YALI0_B22550g),gene1927(YALI0_C01419g),gene1945(YALI0_C01859g),gene2057(YALI0_C04433g),gene2656(YALI0_C18645g),gene2890(YALI0_C23859g),gene2922(YALI0_D00176g),gene3295(YALI0_D08690g),gene3886(YALI0_D22484g),gene389(YALI0_A09856g),gene3984(YALI0_D…	gene1198(YALI0_B08536g),gene1704(YALI0_B19976g),gene2214(YALI0_C08074g),gene3023(YALI0_D02497g),gene3181(YALI0_D06215g),gene4262(YALI0_E03806g),gene6044(YALI0_F08415g),gene6945(YALI0_F28765g),gene965(YALI0_B02852g)
BP	GO:0009063	cellular amino acid catabolic process	24	5	29	38	5.9e-08	9.92562e-06	gene1244(YALI0_B09625g),gene1245(YALI0_B09647g),gene1537(YALI0_B16214g),gene1793(YALI0_B21846g),gene1824(YALI0_B22550g),gene1945(YALI0_C01859g),gene2057(YALI0_C04433g),gene2656(YALI0_C18645g),gene3295(YALI0_D08690g),gene3886(YALI0_D22484g),gene389(YALI0_A09856g),gene4340(YALI0_E05533g),gene4425(YALI0_E07535g),gene4513(YALI0_E09603g),gene4651(YALI0_E12595g),gene4809(YALI0_E16346g),gene4891(YALI0_E…	gene3023(YALI0_D02497g),gene3181(YALI0_D06215g),gene4262(YALI0_E03806g),gene6044(YALI0_F08415g),gene965(YALI0_B02852g)
MF	GO:0140098	catalytic activity, acting on RNA	5	102	107	206	9.7e-08	1.5714e-05	gene1775(YALI0_B21494g),gene3569(YALI0_D14916g),gene494(YALI0_A12705g),gene6814(YALI0_F25839g),gene6846(YALI0_F26543g)	gene1043(YALI0_B04752g),gene1044(YALI0_B04774g),gene1048(YALI0_B04851g),gene1092(YALI0_B05918g),gene1288(YALI0_B10582g),gene1568(YALI0_B16896g),gene1633(YALI0_B18304g),gene1688(YALI0_B19558g),gene1776(YALI0_B21516g),gene1778(YALI0_B21538g),gene1825(YALI0_B22572g),gene2029(YALI0_C03784g),gene218(YALI0_A05555g),gene2333(YALI0_C10780g),gene2460(YALI0_C13882g),gene2506(YALI0_C15048g),gene253(YALI0_A0…
BP	GO:0001510	RNA methylation	2	28	30	41	1.8e-07	2.81186e-05	gene11(YALI0_A00369g),gene990(YALI0_B03498g)	gene1044(YALI0_B04774g),gene1288(YALI0_B10582g),gene1647(YALI0_B18612g),gene1688(YALI0_B19558g),gene2460(YALI0_C13882g),gene3150(YALI0_D05489g),gene3341(YALI0_D09691g),gene3403(YALI0_D10989g),gene3486(YALI0_D12837g),gene3874(YALI0_D22220g),gene4002(YALI0_D25212g),gene4125(YALI0_E00770g),gene4159(YALI0_E01496g),gene4394(YALI0_E06765g),gene4402(YALI0_E06941g),gene5187(YALI0_E24761g),gene5291(YALI0_…
MF	GO:0140101	catalytic activity, acting on a tRNA	0	50	50	80	2.3e-07	3.46903e-05	-	gene1043(YALI0_B04752g),gene1092(YALI0_B05918g),gene1288(YALI0_B10582g),gene1633(YALI0_B18304g),gene1688(YALI0_B19558g),gene1776(YALI0_B21516g),gene2029(YALI0_C03784g),gene2333(YALI0_C10780g),gene2460(YALI0_C13882g),gene2645(YALI0_C18425g),gene2652(YALI0_C18535g),gene3067(YALI0_D03619g),gene3150(YALI0_D05489g),gene3403(YALI0_D10989g),gene3486(YALI0_D12837g),gene3599(YALI0_D15620g),gene369(YALI0_A…
CC	GO:0030684	preribosome	0	47	47	77	4.2e-07	6.1236e-05	-	gene1002(YALI0_B03784g),gene1264(YALI0_B10065g),gene1363(YALI0_B12320g),gene1411(YALI0_B13442g),gene1557(YALI0_B16654g),gene1906(YALI0_C00913g),gene2047(YALI0_C04213g),gene2213(YALI0_C08052g),gene2423(YALI0_C12881g),gene2621(YALI0_C17853g),gene2799(YALI0_C21846g),gene2823(YALI0_C22385g),gene2836(YALI0_C22704g),gene3294(YALI0_D08668g),gene3449(YALI0_D12012g),gene3495(YALI0_D13068g),gene3511(YALI0_…
BP	GO:0002097	tRNA wobble base modification	1	16	17	19	5.7e-07	7.97612e-05	gene4947(YALI0_E19481g)	gene1273(YALI0_B10263g),gene1377(YALI0_B12628g),gene1647(YALI0_B18612g),gene2631(YALI0_C18095g),gene2870(YALI0_C23386g),gene3486(YALI0_D12837g),gene3680(YALI0_D17600g),gene4170(YALI0_E01738g),gene4384(YALI0_E06545g),gene4402(YALI0_E06941g),gene4699(YALI0_E13728g),gene5265(YALI0_E26543g),gene6588(YALI0_F20658g),gene6642(YALI0_F21879g),gene6776(YALI0_F24981g),gene6780(YALI0_F25069g)
CC	GO:0031974	membrane-enclosed lumen	41	219	260	621	6.2e-07	7.97612e-05	gene1215(YALI0_B08965g),gene1245(YALI0_B09647g),gene1375(YALI0_B12584g),gene1408(YALI0_B13376g),gene1865(YALI0_B23430g),gene2241(YALI0_C08701g),gene2285(YALI0_C09614g),gene2301(YALI0_C10032g),gene2403(YALI0_C12364g),gene2467(YALI0_C14058g),gene2566(YALI0_C16500g),gene2591(YALI0_C17061g),gene2786(YALI0_C21582g),gene2902(YALI0_C24123g),gene3129(YALI0_D05041g),gene3295(YALI0_D08690g),gene3452(YALI0_…	gene1002(YALI0_B03784g),gene1016(YALI0_B04136g),gene1043(YALI0_B04752g),gene1048(YALI0_B04851g),gene1101(YALI0_B06116g),gene114(YALI0_A02849g),gene1177(YALI0_B08074g),gene1197(YALI0_B08514g),gene1220(YALI0_B09075g),gene1264(YALI0_B10065g),gene1274(YALI0_B10274g),gene1284(YALI0_B10494g),gene1306(YALI0_B11000g),gene1344(YALI0_B11880g),gene1349(YALI0_B11968g),gene1361(YALI0_B12276g),gene1363(YALI0_B…
CC	GO:0043233	organelle lumen	41	219	260	621	6.2e-07	7.97612e-05	gene1215(YALI0_B08965g),gene1245(YALI0_B09647g),gene1375(YALI0_B12584g),gene1408(YALI0_B13376g),gene1865(YALI0_B23430g),gene2241(YALI0_C08701g),gene2285(YALI0_C09614g),gene2301(YALI0_C10032g),gene2403(YALI0_C12364g),gene2467(YALI0_C14058g),gene2566(YALI0_C16500g),gene2591(YALI0_C17061g),gene2786(YALI0_C21582g),gene2902(YALI0_C24123g),gene3129(YALI0_D05041g),gene3295(YALI0_D08690g),gene3452(YALI0_…	gene1002(YALI0_B03784g),gene1016(YALI0_B04136g),gene1043(YALI0_B04752g),gene1048(YALI0_B04851g),gene1101(YALI0_B06116g),gene114(YALI0_A02849g),gene1177(YALI0_B08074g),gene1197(YALI0_B08514g),gene1220(YALI0_B09075g),gene1264(YALI0_B10065g),gene1274(YALI0_B10274g),gene1284(YALI0_B10494g),gene1306(YALI0_B11000g),gene1344(YALI0_B11880g),gene1349(YALI0_B11968g),gene1361(YALI0_B12276g),gene1363(YALI0_B…
CC	GO:0070013	intracellular organelle lumen	41	219	260	621	6.2e-07	7.97612e-05	gene1215(YALI0_B08965g),gene1245(YALI0_B09647g),gene1375(YALI0_B12584g),gene1408(YALI0_B13376g),gene1865(YALI0_B23430g),gene2241(YALI0_C08701g),gene2285(YALI0_C09614g),gene2301(YALI0_C10032g),gene2403(YALI0_C12364g),gene2467(YALI0_C14058g),gene2566(YALI0_C16500g),gene2591(YALI0_C17061g),gene2786(YALI0_C21582g),gene2902(YALI0_C24123g),gene3129(YALI0_D05041g),gene3295(YALI0_D08690g),gene3452(YALI0_…	gene1002(YALI0_B03784g),gene1016(YALI0_B04136g),gene1043(YALI0_B04752g),gene1048(YALI0_B04851g),gene1101(YALI0_B06116g),gene114(YALI0_A02849g),gene1177(YALI0_B08074g),gene1197(YALI0_B08514g),gene1220(YALI0_B09075g),gene1264(YALI0_B10065g),gene1274(YALI0_B10274g),gene1284(YALI0_B10494g),gene1306(YALI0_B11000g),gene1344(YALI0_B11880g),gene1349(YALI0_B11968g),gene1361(YALI0_B12276g),gene1363(YALI0_B…
BP	GO:0055085	transmembrane transport	130	78	208	484	1.3e-06	0.00015795	gene0(YALI0_A00110g),gene1019(YALI0_B04202g),gene1111(YALI0_B06391g),gene1194(YALI0_B08448g),gene1204(YALI0_B08712g),gene1240(YALI0_B09537g),gene1358(YALI0_B12188g),gene1392(YALI0_B12980g),gene14(YALI0_A00418g),gene1505(YALI0_B15488g),gene1551(YALI0_B16522g),gene157(YALI0_A03949g),gene1613(YALI0_B17864g),gene1616(YALI0_B17930g),gene1665(YALI0_B18986g),gene1680(YALI0_B19338g),gene1685(YALI0_B19470…	gene1391(YALI0_B12958g),gene1426(YALI0_B13794g),gene1530(YALI0_B16060g),gene1609(YALI0_B17776g),gene1709(YALI0_B20064g),gene1759(YALI0_B21142g),gene1781(YALI0_B21604g),gene2168(YALI0_C06974g),gene2185(YALI0_C07348g),gene2293(YALI0_C09823g),gene2396(YALI0_C12232g),gene2397(YALI0_C12254g),gene2483(YALI0_C14498g),gene2530(YALI0_C15488g),gene2556(YALI0_C16225g),gene2629(YALI0_C18051g),gene2651(YALI0_…
CC	GO:0030686	90S preribosome	0	23	23	30	1.3e-06	0.00015795	-	gene1002(YALI0_B03784g),gene1264(YALI0_B10065g),gene1363(YALI0_B12320g),gene1411(YALI0_B13442g),gene1906(YALI0_C00913g),gene2621(YALI0_C17853g),gene2799(YALI0_C21846g),gene2836(YALI0_C22704g),gene3449(YALI0_D12012g),gene3947(YALI0_D23859g),gene4536(YALI0_E10109g),gene5257(YALI0_E26389g),gene5400(YALI0_E29506g),gene5499(YALI0_E31625g),gene5522(YALI0_E32043g),gene6042(YALI0_F08371g),gene6054(YALI0_…
BP	GO:0030488	tRNA methylation	0	19	19	23	1.5e-06	0.000177324	-	gene1288(YALI0_B10582g),gene1647(YALI0_B18612g),gene1688(YALI0_B19558g),gene2460(YALI0_C13882g),gene3150(YALI0_D05489g),gene3403(YALI0_D10989g),gene3486(YALI0_D12837g),gene3874(YALI0_D22220g),gene4002(YALI0_D25212g),gene4394(YALI0_E06765g),gene4402(YALI0_E06941g),gene5187(YALI0_E24761g),gene5291(YALI0_E27137g),gene5456(YALI0_E30723g),gene5578(YALI0_E33209g),gene6232(YALI0_F12771g),gene6379(YALI0_…
MF	GO:0016741	transferase activity, transferring one-carbon groups	10	45	55	95	2e-06	0.000230211	gene108(YALI0_A02673g),gene1661(YALI0_B18898g),gene2300(YALI0_C10010g),gene2339(YALI0_C10901g),gene3886(YALI0_D22484g),gene4337(YALI0_E05467g),gene4656(YALI0_E12683g),gene4809(YALI0_E16346g),gene5789(YALI0_F02849g),gene976(YALI0_B03124g)	gene1044(YALI0_B04774g),gene1201(YALI0_B08624g),gene1288(YALI0_B10582g),gene1522(YALI0_B15884g),gene1688(YALI0_B19558g),gene2460(YALI0_C13882g),gene2636(YALI0_C18205g),gene2895(YALI0_C23969g),gene3150(YALI0_D05489g),gene3228(YALI0_D07238g),gene3341(YALI0_D09691g),gene3367(YALI0_D10234g),gene3403(YALI0_D10989g),gene3441(YALI0_D11792g),gene3486(YALI0_D12837g),gene3487(YALI0_D12859g),gene3568(YALI0_…
BP	GO:1901606	alpha-amino acid catabolic process	19	5	24	33	3.8e-06	0.000426185	gene1244(YALI0_B09625g),gene1245(YALI0_B09647g),gene1537(YALI0_B16214g),gene1793(YALI0_B21846g),gene1824(YALI0_B22550g),gene1945(YALI0_C01859g),gene2057(YALI0_C04433g),gene3886(YALI0_D22484g),gene389(YALI0_A09856g),gene4340(YALI0_E05533g),gene4425(YALI0_E07535g),gene4513(YALI0_E09603g),gene4651(YALI0_E12595g),gene4809(YALI0_E16346g),gene5778(YALI0_F02607g),gene5789(YALI0_F02849g),gene5929(YALI0_F…	gene3023(YALI0_D02497g),gene3181(YALI0_D06215g),gene4262(YALI0_E03806g),gene6044(YALI0_F08415g),gene965(YALI0_B02852g)
BP	GO:0002098	tRNA wobble uridine modification	1	14	15	17	4.2e-06	0.000458737	gene4947(YALI0_E19481g)	gene1273(YALI0_B10263g),gene1377(YALI0_B12628g),gene1647(YALI0_B18612g),gene2631(YALI0_C18095g),gene2870(YALI0_C23386g),gene3486(YALI0_D12837g),gene3680(YALI0_D17600g),gene4170(YALI0_E01738g),gene4384(YALI0_E06545g),gene4402(YALI0_E06941g),gene6588(YALI0_F20658g),gene6642(YALI0_F21879g),gene6776(YALI0_F24981g),gene6780(YALI0_F25069g)
BP	GO:0016070	RNA metabolic process	79	266	345	869	4.3e-06	0.000458737	gene1033(YALI0_B04510g),gene1057(YALI0_B05038g),gene1073(YALI0_B05478g),gene11(YALI0_A00369g),gene1247(YALI0_B09713g),gene1258(YALI0_B09977g),gene1375(YALI0_B12584g),gene1401(YALI0_B13200g),gene1419(YALI0_B13640g),gene1540(YALI0_B16280g),gene1752(YALI0_B20988g),gene1775(YALI0_B21494g),gene1807(YALI0_B22176g),gene1865(YALI0_B23430g),gene2267(YALI0_C09232g),gene2300(YALI0_C10010g),gene2467(YALI0_C1…	gene1002(YALI0_B03784g),gene1016(YALI0_B04136g),gene1043(YALI0_B04752g),gene1044(YALI0_B04774g),gene1048(YALI0_B04851g),gene1079(YALI0_B05632g),gene1092(YALI0_B05918g),gene1197(YALI0_B08514g),gene1223(YALI0_B09119g),gene1264(YALI0_B10065g),gene1271(YALI0_B10219g),gene1273(YALI0_B10263g),gene1288(YALI0_B10582g),gene1349(YALI0_B11968g),gene1361(YALI0_B12276g),gene1363(YALI0_B12320g),gene1377(YALI0_…
BP	GO:0010467	gene expression	80	342	422	1088	4.6e-06	0.000479057	gene1033(YALI0_B04510g),gene1057(YALI0_B05038g),gene1073(YALI0_B05478g),gene1247(YALI0_B09713g),gene1258(YALI0_B09977g),gene1375(YALI0_B12584g),gene1401(YALI0_B13200g),gene1419(YALI0_B13640g),gene1540(YALI0_B16280g),gene1752(YALI0_B20988g),gene1807(YALI0_B22176g),gene1865(YALI0_B23430g),gene2267(YALI0_C09232g),gene2300(YALI0_C10010g),gene2467(YALI0_C14058g),gene2513(YALI0_C15202g),gene2526(YALI0_…	gene1002(YALI0_B03784g),gene1016(YALI0_B04136g),gene1043(YALI0_B04752g),gene1044(YALI0_B04774g),gene1048(YALI0_B04851g),gene1079(YALI0_B05632g),gene1084(YALI0_B05742g),gene1092(YALI0_B05918g),gene1101(YALI0_B06116g),gene1118(YALI0_B06578g),gene114(YALI0_A02849g),gene1197(YALI0_B08514g),gene121(YALI0_A03003g),gene1223(YALI0_B09119g),gene1264(YALI0_B10065g),gene1273(YALI0_B10263g),gene1284(YALI0_B1…
CC	GO:0005886	plasma membrane	110	52	162	369	4.8e-06	0.00048826	gene0(YALI0_A00110g),gene1019(YALI0_B04202g),gene1111(YALI0_B06391g),gene1163(YALI0_B07601g),gene1194(YALI0_B08448g),gene1243(YALI0_B09603g),gene1296(YALI0_B10780g),gene1392(YALI0_B12980g),gene14(YALI0_A00418g),gene1505(YALI0_B15488g),gene157(YALI0_A03949g),gene1613(YALI0_B17864g),gene1616(YALI0_B17930g),gene1645(YALI0_B18568g),gene1665(YALI0_B18986g),gene1685(YALI0_B19470g),gene172(YALI0_A04367g…	gene1059(YALI0_B05126g),gene1123(YALI0_B06710g),gene1420(YALI0_B13662g),gene1426(YALI0_B13794g),gene1609(YALI0_B17776g),gene1759(YALI0_B21142g),gene2185(YALI0_C07348g),gene2293(YALI0_C09823g),gene2396(YALI0_C12232g),gene2397(YALI0_C12254g),gene2530(YALI0_C15488g),gene2556(YALI0_C16225g),gene2655(YALI0_C18623g),gene2731(YALI0_C20295g),gene2777(YALI0_C21406g),gene2831(YALI0_C22594g),gene2949(YALI0_…
BP	GO:0032259	methylation	9	45	54	98	5.6e-06	0.000556691	gene108(YALI0_A02673g),gene11(YALI0_A00369g),gene2300(YALI0_C10010g),gene2339(YALI0_C10901g),gene4337(YALI0_E05467g),gene4656(YALI0_E12683g),gene5789(YALI0_F02849g),gene976(YALI0_B03124g),gene990(YALI0_B03498g)	gene1044(YALI0_B04774g),gene1201(YALI0_B08624g),gene1288(YALI0_B10582g),gene1522(YALI0_B15884g),gene1647(YALI0_B18612g),gene1688(YALI0_B19558g),gene1760(YALI0_B21164g),gene2460(YALI0_C13882g),gene2636(YALI0_C18205g),gene3150(YALI0_D05489g),gene3228(YALI0_D07238g),gene3341(YALI0_D09691g),gene3367(YALI0_D10234g),gene3403(YALI0_D10989g),gene3441(YALI0_D11792g),gene3486(YALI0_D12837g),gene3487(YALI0_…
BP	GO:0044282	small molecule catabolic process	45	11	56	103	6.5e-06	0.0006318	gene1244(YALI0_B09625g),gene1245(YALI0_B09647g),gene1280(YALI0_B10406g),gene1537(YALI0_B16214g),gene1793(YALI0_B21846g),gene1822(YALI0_B22506g),gene1824(YALI0_B22550g),gene1927(YALI0_C01419g),gene1945(YALI0_C01859g),gene2057(YALI0_C04433g),gene2656(YALI0_C18645g),gene2890(YALI0_C23859g),gene2922(YALI0_D00176g),gene3295(YALI0_D08690g),gene3886(YALI0_D22484g),gene389(YALI0_A09856g),gene3984(YALI0_D…	gene1198(YALI0_B08536g),gene1704(YALI0_B19976g),gene2214(YALI0_C08074g),gene2283(YALI0_C09570g),gene2430(YALI0_C13090g),gene3023(YALI0_D02497g),gene3181(YALI0_D06215g),gene4262(YALI0_E03806g),gene6044(YALI0_F08415g),gene6945(YALI0_F28765g),gene965(YALI0_B02852g)
MF	GO:0008175	tRNA methyltransferase activity	0	16	16	19	1.1e-05	0.00104596	-	gene1288(YALI0_B10582g),gene1688(YALI0_B19558g),gene2460(YALI0_C13882g),gene3150(YALI0_D05489g),gene3403(YALI0_D10989g),gene3486(YALI0_D12837g),gene3874(YALI0_D22220g),gene4002(YALI0_D25212g),gene4394(YALI0_E06765g),gene5291(YALI0_E27137g),gene5456(YALI0_E30723g),gene5578(YALI0_E33209g),gene6232(YALI0_F12771g),gene6379(YALI0_F16049g),gene6567(YALI0_F20196g),gene6680(YALI0_F22737g)
MF	GO:0048037	cofactor binding	65	32	97	199	1.5e-05	0.00139596	gene1112(YALI0_B06413g),gene1138(YALI0_B07029g),gene1176(YALI0_B08052g),gene1244(YALI0_B09625g),gene1537(YALI0_B16214g),gene1681(YALI0_B19360g),gene1706(YALI0_B19998g),gene1822(YALI0_B22506g),gene1865(YALI0_B23430g),gene2057(YALI0_C04433g),gene2088(YALI0_C05258g),gene2109(YALI0_C05709g),gene2246(YALI0_C08811g),gene2497(YALI0_C14806g),gene2579(YALI0_C16797g),gene2641(YALI0_C18315g),gene2700(YALI0_…	gene1436(YALI0_B14014g),gene1536(YALI0_B16192g),gene1704(YALI0_B19976g),gene1776(YALI0_B21516g),gene1876(YALI0_C00253g),gene2214(YALI0_C08074g),gene2230(YALI0_C08459g),gene2803(YALI0_C21934g),gene3009(YALI0_D02145g),gene3023(YALI0_D02497g),gene3102(YALI0_D04422g),gene3143(YALI0_D05335g),gene3362(YALI0_D10131g),gene3544(YALI0_D14322g),gene356(YALI0_A09042g),gene3612(YALI0_D15928g),gene3687(YALI0_D…
MF	GO:0008173	RNA methyltransferase activity	0	24	24	34	1.8e-05	0.00164025	-	gene1044(YALI0_B04774g),gene1288(YALI0_B10582g),gene1688(YALI0_B19558g),gene2460(YALI0_C13882g),gene3150(YALI0_D05489g),gene3403(YALI0_D10989g),gene3486(YALI0_D12837g),gene3874(YALI0_D22220g),gene4002(YALI0_D25212g),gene4125(YALI0_E00770g),gene4159(YALI0_E01496g),gene4394(YALI0_E06765g),gene5291(YALI0_E27137g),gene5456(YALI0_E30723g),gene5516(YALI0_E31933g),gene5578(YALI0_E33209g),gene5958(YALI0_…
BP	GO:0009081	branched-chain amino acid metabolic process	7	9	16	20	2.3e-05	0.0020531	gene1824(YALI0_B22550g),gene1945(YALI0_C01859g),gene2972(YALI0_D01265g),gene3295(YALI0_D08690g),gene4651(YALI0_E12595g),gene5778(YALI0_F02607g),gene5886(YALI0_F05038g)	gene1096(YALI0_B06006g),gene1876(YALI0_C00253g),gene1883(YALI0_C00407g),gene2871(YALI0_C23408g),gene3023(YALI0_D02497g),gene3050(YALI0_D03135g),gene3181(YALI0_D06215g),gene6599(YALI0_F20900g),gene901(YALI0_B01364g)
BP	GO:0000959	mitochondrial RNA metabolic process	0	13	13	15	3e-05	0.0026244	-	gene1092(YALI0_B05918g),gene1402(YALI0_B13222g),gene2645(YALI0_C18425g),gene3150(YALI0_D05489g),gene3261(YALI0_D07920g),gene369(YALI0_A09427g),gene3936(YALI0_D23639g),gene4402(YALI0_E06941g),gene468(YALI0_A12001g),gene509(YALI0_A13057g),gene6232(YALI0_F12771g),gene6337(YALI0_F15147g),gene928(YALI0_B01980g)
MF	GO:0008168	methyltransferase activity	7	41	48	86	3.4e-05	0.002916	gene108(YALI0_A02673g),gene2300(YALI0_C10010g),gene2339(YALI0_C10901g),gene4337(YALI0_E05467g),gene4656(YALI0_E12683g),gene5789(YALI0_F02849g),gene976(YALI0_B03124g)	gene1044(YALI0_B04774g),gene1201(YALI0_B08624g),gene1288(YALI0_B10582g),gene1522(YALI0_B15884g),gene1688(YALI0_B19558g),gene2460(YALI0_C13882g),gene2636(YALI0_C18205g),gene3150(YALI0_D05489g),gene3228(YALI0_D07238g),gene3341(YALI0_D09691g),gene3367(YALI0_D10234g),gene3403(YALI0_D10989g),gene3441(YALI0_D11792g),gene3486(YALI0_D12837g),gene3487(YALI0_D12859g),gene3649(YALI0_D16929g),gene3854(YALI0_…
BP	GO:0055114	oxidation-reduction process	121	69	190	455	3.6e-05	0.00297102	gene1036(YALI0_B04598g),gene1051(YALI0_B04906g),gene1112(YALI0_B06413g),gene1138(YALI0_B07029g),gene1142(YALI0_B07117g),gene1176(YALI0_B08052g),gene1180(YALI0_B08140g),gene1215(YALI0_B08965g),gene1244(YALI0_B09625g),gene1245(YALI0_B09647g),gene1280(YALI0_B10406g),gene1353(YALI0_B12078g),gene1366(YALI0_B12386g),gene1428(YALI0_B13838g),gene1494(YALI0_B15268g),gene1575(YALI0_B17050g),gene1706(YALI0_…	gene1006(YALI0_B03916g),gene1059(YALI0_B05126g),gene1198(YALI0_B08536g),gene1289(YALI0_B10604g),gene1427(YALI0_B13816g),gene1436(YALI0_B14014g),gene1485(YALI0_B15059g),gene1536(YALI0_B16192g),gene1561(YALI0_B16742g),gene1682(YALI0_B19382g),gene1704(YALI0_B19976g),gene1710(YALI0_B20086g),gene1757(YALI0_B21098g),gene1776(YALI0_B21516g),gene1859(YALI0_B23298g),gene1879(YALI0_C00319g),gene1883(YALI0_…
CC	GO:0031226	intrinsic component of plasma membrane	60	29	89	189	3.6e-05	0.00297102	gene0(YALI0_A00110g),gene1111(YALI0_B06391g),gene1194(YALI0_B08448g),gene14(YALI0_A00418g),gene1505(YALI0_B15488g),gene157(YALI0_A03949g),gene1613(YALI0_B17864g),gene1616(YALI0_B17930g),gene1665(YALI0_B18986g),gene1894(YALI0_C00627g),gene1902(YALI0_C00825g),gene1903(YALI0_C00847g),gene2059(YALI0_C04477g),gene2071(YALI0_C04796g),gene2141(YALI0_C06424g),gene2149(YALI0_C06578g),gene2201(YALI0_C07722…	gene1426(YALI0_B13794g),gene1609(YALI0_B17776g),gene1759(YALI0_B21142g),gene2185(YALI0_C07348g),gene2293(YALI0_C09823g),gene2396(YALI0_C12232g),gene2530(YALI0_C15488g),gene2556(YALI0_C16225g),gene2831(YALI0_C22594g),gene3207(YALI0_D06754g),gene3357(YALI0_D10043g),gene367(YALI0_A09383g),gene3865(YALI0_D22000g),gene4237(YALI0_E03234g),gene4265(YALI0_E03872g),gene4438(YALI0_E07920g),gene4487(YALI0_E…
BP	GO:0030490	maturation of SSU-rRNA	0	25	25	38	3.8e-05	0.003078	-	gene1002(YALI0_B03784g),gene1016(YALI0_B04136g),gene1223(YALI0_B09119g),gene1470(YALI0_B14751g),gene1778(YALI0_B21538g),gene2621(YALI0_C17853g),gene2799(YALI0_C21846g),gene2823(YALI0_C22385g),gene3426(YALI0_D11462g),gene3537(YALI0_D14080g),gene3746(YALI0_D19118g),gene4063(YALI0_D26620g),gene4552(YALI0_E10439g),gene4715(YALI0_E14124g),gene4772(YALI0_E15466g),gene5400(YALI0_E29506g),gene5522(YALI0_…
CC	GO:0032040	small-subunit processome	0	24	24	36	3.9e-05	0.00310156	-	gene1264(YALI0_B10065g),gene1411(YALI0_B13442g),gene1906(YALI0_C00913g),gene3511(YALI0_D13464g),gene3537(YALI0_D14080g),gene3947(YALI0_D23859g),gene4159(YALI0_E01496g),gene4179(YALI0_E01936g),gene4552(YALI0_E10439g),gene5400(YALI0_E29506g),gene5499(YALI0_E31625g),gene5522(YALI0_E32043g),gene6042(YALI0_F08371g),gene6054(YALI0_F08657g),gene6105(YALI0_F09856g),gene6302(YALI0_F14377g),gene6438(YALI0_…
CC	GO:0005887	integral component of plasma membrane	59	29	88	187	4.1e-05	0.00320239	gene0(YALI0_A00110g),gene1111(YALI0_B06391g),gene1194(YALI0_B08448g),gene14(YALI0_A00418g),gene1505(YALI0_B15488g),gene157(YALI0_A03949g),gene1613(YALI0_B17864g),gene1616(YALI0_B17930g),gene1665(YALI0_B18986g),gene1894(YALI0_C00627g),gene1902(YALI0_C00825g),gene1903(YALI0_C00847g),gene2059(YALI0_C04477g),gene2071(YALI0_C04796g),gene2141(YALI0_C06424g),gene2149(YALI0_C06578g),gene2201(YALI0_C07722…	gene1426(YALI0_B13794g),gene1609(YALI0_B17776g),gene1759(YALI0_B21142g),gene2185(YALI0_C07348g),gene2293(YALI0_C09823g),gene2396(YALI0_C12232g),gene2530(YALI0_C15488g),gene2556(YALI0_C16225g),gene2831(YALI0_C22594g),gene3207(YALI0_D06754g),gene3357(YALI0_D10043g),gene367(YALI0_A09383g),gene3865(YALI0_D22000g),gene4237(YALI0_E03234g),gene4265(YALI0_E03872g),gene4438(YALI0_E07920g),gene4487(YALI0_E…
BP	GO:0006520	cellular amino acid metabolic process	45	41	86	183	5.6e-05	0.00429726	gene1153(YALI0_B07359g),gene1244(YALI0_B09625g),gene1245(YALI0_B09647g),gene1537(YALI0_B16214g),gene1681(YALI0_B19360g),gene1706(YALI0_B19998g),gene1793(YALI0_B21846g),gene1824(YALI0_B22550g),gene1945(YALI0_C01859g),gene2057(YALI0_C04433g),gene2088(YALI0_C05258g),gene2656(YALI0_C18645g),gene2942(YALI0_D00605g),gene2972(YALI0_D01265g),gene3295(YALI0_D08690g),gene3493(YALI0_D13024g),gene3671(YALI0_…	gene1092(YALI0_B05918g),gene1096(YALI0_B06006g),gene1707(YALI0_B20020g),gene1876(YALI0_C00253g),gene1883(YALI0_C00407g),gene2085(YALI0_C05170g),gene212(YALI0_A05379g),gene2333(YALI0_C10780g),gene2645(YALI0_C18425g),gene2652(YALI0_C18535g),gene2871(YALI0_C23408g),gene2895(YALI0_C23969g),gene3023(YALI0_D02497g),gene3050(YALI0_D03135g),gene3067(YALI0_D03619g),gene3181(YALI0_D06215g),gene3234(YALI0_D…
BP	GO:0042274	ribosomal small subunit biogenesis	0	31	31	52	7.9e-05	0.00595769	-	gene1002(YALI0_B03784g),gene1016(YALI0_B04136g),gene1223(YALI0_B09119g),gene1470(YALI0_B14751g),gene1778(YALI0_B21538g),gene1826(YALI0_B22594g),gene2621(YALI0_C17853g),gene2799(YALI0_C21846g),gene2823(YALI0_C22385g),gene3284(YALI0_D08470g),gene3426(YALI0_D11462g),gene3537(YALI0_D14080g),gene3623(YALI0_D16313g),gene3746(YALI0_D19118g),gene4063(YALI0_D26620g),gene4463(YALI0_E08448g),gene4552(YALI0_…
BP	GO:0070585	protein localization to mitochondrion	0	26	26	42	0.00012	0.008748	-	gene1305(YALI0_B10978g),gene1391(YALI0_B12958g),gene1692(YALI0_B19646g),gene2168(YALI0_C06974g),gene2651(YALI0_C18513g),gene278(YALI0_A07084g),gene2795(YALI0_C21780g),gene2947(YALI0_D00715g),gene3108(YALI0_D04554g),gene3214(YALI0_D06908g),gene3831(YALI0_D21142g),gene394(YALI0_A09988g),gene4321(YALI0_E05115g),gene4372(YALI0_E06237g),gene4731(YALI0_E14487g),gene4759(YALI0_E15136g),gene5457(YALI0_E3…
BP	GO:0072655	establishment of protein localization to mitochondrion	0	26	26	42	0.00012	0.008748	-	gene1305(YALI0_B10978g),gene1391(YALI0_B12958g),gene1692(YALI0_B19646g),gene2168(YALI0_C06974g),gene2651(YALI0_C18513g),gene278(YALI0_A07084g),gene2795(YALI0_C21780g),gene2947(YALI0_D00715g),gene3108(YALI0_D04554g),gene3214(YALI0_D06908g),gene3831(YALI0_D21142g),gene394(YALI0_A09988g),gene4321(YALI0_E05115g),gene4372(YALI0_E06237g),gene4731(YALI0_E14487g),gene4759(YALI0_E15136g),gene5457(YALI0_E3…
CC	GO:0044459	plasma membrane part	62	30	92	202	0.00013	0.00932164	gene0(YALI0_A00110g),gene1111(YALI0_B06391g),gene1194(YALI0_B08448g),gene14(YALI0_A00418g),gene1505(YALI0_B15488g),gene157(YALI0_A03949g),gene1613(YALI0_B17864g),gene1616(YALI0_B17930g),gene1665(YALI0_B18986g),gene1894(YALI0_C00627g),gene1902(YALI0_C00825g),gene1903(YALI0_C00847g),gene2059(YALI0_C04477g),gene2071(YALI0_C04796g),gene2141(YALI0_C06424g),gene2149(YALI0_C06578g),gene2201(YALI0_C07722…	gene1426(YALI0_B13794g),gene1609(YALI0_B17776g),gene1759(YALI0_B21142g),gene2185(YALI0_C07348g),gene2293(YALI0_C09823g),gene2396(YALI0_C12232g),gene2530(YALI0_C15488g),gene2556(YALI0_C16225g),gene2655(YALI0_C18623g),gene2831(YALI0_C22594g),gene3207(YALI0_D06754g),gene3357(YALI0_D10043g),gene367(YALI0_A09383g),gene3865(YALI0_D22000g),gene4237(YALI0_E03234g),gene4265(YALI0_E03872g),gene4438(YALI0_E…
MF	GO:0050660	flavin adenine dinucleotide binding	20	13	33	56	0.00014	0.00987677	gene1244(YALI0_B09625g),gene1706(YALI0_B19998g),gene1865(YALI0_B23430g),gene2579(YALI0_C16797g),gene2890(YALI0_C23859g),gene292(YALI0_A07425g),gene3603(YALI0_D15708g),gene3984(YALI0_D24750g),gene4077(YALI0_D26972g),gene4236(YALI0_E03212g),gene4385(YALI0_E06567g),gene4650(YALI0_E12573g),gene4810(YALI0_E16368g),gene5313(YALI0_E27654g),gene5562(YALI0_E32835g),gene6121(YALI0_F10197g),gene6147(YALI0_F…	gene1436(YALI0_B14014g),gene1776(YALI0_B21516g),gene1876(YALI0_C00253g),gene3102(YALI0_D04422g),gene356(YALI0_A09042g),gene3612(YALI0_D15928g),gene3687(YALI0_D17754g),gene4031(YALI0_D25894g),gene4402(YALI0_E06941g),gene4450(YALI0_E08162g),gene5241(YALI0_E26048g),gene5242(YALI0_E26059g),gene6959(YALI0_F29205g)
CC	GO:0031314	extrinsic component of mitochondrial inner membrane	0	8	8	8	0.00015	0.0104143	-	gene1513(YALI0_B15664g),gene1522(YALI0_B15884g),gene2636(YALI0_C18205g),gene356(YALI0_A09042g),gene4763(YALI0_E15224g),gene5544(YALI0_E32483g),gene6145(YALI0_F10769g),gene6878(YALI0_F27247g)
MF	GO:0016491	oxidoreductase activity	109	64	173	405	0.00018	0.0123019	gene1051(YALI0_B04906g),gene1112(YALI0_B06413g),gene1138(YALI0_B07029g),gene1142(YALI0_B07117g),gene1176(YALI0_B08052g),gene1180(YALI0_B08140g),gene1244(YALI0_B09625g),gene1245(YALI0_B09647g),gene1353(YALI0_B12078g),gene1366(YALI0_B12386g),gene1428(YALI0_B13838g),gene1494(YALI0_B15268g),gene1706(YALI0_B19998g),gene1790(YALI0_B21780g),gene1792(YALI0_B21824g),gene1793(YALI0_B21846g),gene1822(YALI0_…	gene1006(YALI0_B03916g),gene1059(YALI0_B05126g),gene1289(YALI0_B10604g),gene1427(YALI0_B13816g),gene1436(YALI0_B14014g),gene1485(YALI0_B15059g),gene1536(YALI0_B16192g),gene1561(YALI0_B16742g),gene1682(YALI0_B19382g),gene1704(YALI0_B19976g),gene1710(YALI0_B20086g),gene1757(YALI0_B21098g),gene1776(YALI0_B21516g),gene1859(YALI0_B23298g),gene1879(YALI0_C00319g),gene1883(YALI0_C00407g),gene2214(YALI0_…
BP	GO:0006082	organic acid metabolic process	74	61	135	319	0.00027	0.0181689	gene1153(YALI0_B07359g),gene1244(YALI0_B09625g),gene1245(YALI0_B09647g),gene1280(YALI0_B10406g),gene1537(YALI0_B16214g),gene1661(YALI0_B18898g),gene1681(YALI0_B19360g),gene1706(YALI0_B19998g),gene1793(YALI0_B21846g),gene1813(YALI0_B22308g),gene1822(YALI0_B22506g),gene1824(YALI0_B22550g),gene1927(YALI0_C01419g),gene1945(YALI0_C01859g),gene2057(YALI0_C04433g),gene2088(YALI0_C05258g),gene2246(YALI0_…	gene1092(YALI0_B05918g),gene1096(YALI0_B06006g),gene1198(YALI0_B08536g),gene1485(YALI0_B15059g),gene1538(YALI0_B16236g),gene1682(YALI0_B19382g),gene1704(YALI0_B19976g),gene1707(YALI0_B20020g),gene1876(YALI0_C00253g),gene1883(YALI0_C00407g),gene1996(YALI0_C03069g),gene2085(YALI0_C05170g),gene212(YALI0_A05379g),gene2158(YALI0_C06776g),gene2214(YALI0_C08074g),gene2333(YALI0_C10780g),gene2360(YALI0_C…
BP	GO:0019752	carboxylic acid metabolic process	73	59	132	312	0.00032	0.0212073	gene1153(YALI0_B07359g),gene1244(YALI0_B09625g),gene1245(YALI0_B09647g),gene1280(YALI0_B10406g),gene1537(YALI0_B16214g),gene1661(YALI0_B18898g),gene1681(YALI0_B19360g),gene1706(YALI0_B19998g),gene1793(YALI0_B21846g),gene1813(YALI0_B22308g),gene1822(YALI0_B22506g),gene1824(YALI0_B22550g),gene1927(YALI0_C01419g),gene1945(YALI0_C01859g),gene2057(YALI0_C04433g),gene2088(YALI0_C05258g),gene2246(YALI0_…	gene1092(YALI0_B05918g),gene1096(YALI0_B06006g),gene1198(YALI0_B08536g),gene1485(YALI0_B15059g),gene1682(YALI0_B19382g),gene1704(YALI0_B19976g),gene1707(YALI0_B20020g),gene1876(YALI0_C00253g),gene1883(YALI0_C00407g),gene2085(YALI0_C05170g),gene212(YALI0_A05379g),gene2158(YALI0_C06776g),gene2214(YALI0_C08074g),gene2333(YALI0_C10780g),gene2360(YALI0_C11407g),gene2645(YALI0_C18425g),gene2652(YALI0_C…
BP	GO:0043436	oxoacid metabolic process	73	61	134	318	0.00036	0.0231565	gene1153(YALI0_B07359g),gene1244(YALI0_B09625g),gene1245(YALI0_B09647g),gene1280(YALI0_B10406g),gene1537(YALI0_B16214g),gene1661(YALI0_B18898g),gene1681(YALI0_B19360g),gene1706(YALI0_B19998g),gene1793(YALI0_B21846g),gene1813(YALI0_B22308g),gene1822(YALI0_B22506g),gene1824(YALI0_B22550g),gene1927(YALI0_C01419g),gene1945(YALI0_C01859g),gene2057(YALI0_C04433g),gene2088(YALI0_C05258g),gene2246(YALI0_…	gene1092(YALI0_B05918g),gene1096(YALI0_B06006g),gene1198(YALI0_B08536g),gene1485(YALI0_B15059g),gene1538(YALI0_B16236g),gene1682(YALI0_B19382g),gene1704(YALI0_B19976g),gene1707(YALI0_B20020g),gene1876(YALI0_C00253g),gene1883(YALI0_C00407g),gene1996(YALI0_C03069g),gene2085(YALI0_C05170g),gene212(YALI0_A05379g),gene2158(YALI0_C06776g),gene2214(YALI0_C08074g),gene2333(YALI0_C10780g),gene2360(YALI0_C…
BP	GO:0006635	fatty acid beta-oxidation	13	1	14	19	0.00036	0.0231565	gene1280(YALI0_B10406g),gene2890(YALI0_C23859g),gene2922(YALI0_D00176g),gene3984(YALI0_D24750g),gene4385(YALI0_E06567g),gene4581(YALI0_E11099g),gene4905(YALI0_E18568g),gene5313(YALI0_E27654g),gene5562(YALI0_E32835g),gene6147(YALI0_F10857g),gene6653(YALI0_F22121g),gene6937(YALI0_F28567g),gene794(YALI0_A20207g)	gene1198(YALI0_B08536g)
BP	GO:1901605	alpha-amino acid metabolic process	40	22	62	130	0.00037	0.0234548	gene1153(YALI0_B07359g),gene1244(YALI0_B09625g),gene1245(YALI0_B09647g),gene1537(YALI0_B16214g),gene1681(YALI0_B19360g),gene1706(YALI0_B19998g),gene1793(YALI0_B21846g),gene1824(YALI0_B22550g),gene1945(YALI0_C01859g),gene2057(YALI0_C04433g),gene2088(YALI0_C05258g),gene2942(YALI0_D00605g),gene2972(YALI0_D01265g),gene3493(YALI0_D13024g),gene3671(YALI0_D17402g),gene3886(YALI0_D22484g),gene389(YALI0_A…	gene1096(YALI0_B06006g),gene1876(YALI0_C00253g),gene1883(YALI0_C00407g),gene2085(YALI0_C05170g),gene212(YALI0_A05379g),gene2895(YALI0_C23969g),gene3023(YALI0_D02497g),gene3050(YALI0_D03135g),gene3181(YALI0_D06215g),gene3234(YALI0_D07370g),gene3568(YALI0_D14894g),gene4215(YALI0_E02728g),gene4262(YALI0_E03806g),gene4509(YALI0_E09493g),gene4742(YALI0_E14751g),gene520(YALI0_A13387g),gene6044(YALI0_F0…
BP	GO:0006536	glutamate metabolic process	6	1	7	7	0.00045	0.0277225	gene1244(YALI0_B09625g),gene1245(YALI0_B09647g),gene1706(YALI0_B19998g),gene2057(YALI0_C04433g),gene4513(YALI0_E09603g),gene6458(YALI0_F17820g)	gene6044(YALI0_F08415g)
BP	GO:0009083	branched-chain amino acid catabolic process	6	1	7	7	0.00045	0.0277225	gene1824(YALI0_B22550g),gene1945(YALI0_C01859g),gene3295(YALI0_D08690g),gene4651(YALI0_E12595g),gene5778(YALI0_F02607g),gene5886(YALI0_F05038g)	gene3181(YALI0_D06215g)
CC	GO:0071944	cell periphery	131	56	187	465	0.00047	0.0285525	gene0(YALI0_A00110g),gene1019(YALI0_B04202g),gene1080(YALI0_B05654g),gene1111(YALI0_B06391g),gene1163(YALI0_B07601g),gene1194(YALI0_B08448g),gene1243(YALI0_B09603g),gene1296(YALI0_B10780g),gene1392(YALI0_B12980g),gene14(YALI0_A00418g),gene1505(YALI0_B15488g),gene157(YALI0_A03949g),gene1613(YALI0_B17864g),gene1616(YALI0_B17930g),gene1645(YALI0_B18568g),gene1665(YALI0_B18986g),gene1685(YALI0_B19470…	gene1059(YALI0_B05126g),gene1123(YALI0_B06710g),gene1420(YALI0_B13662g),gene1426(YALI0_B13794g),gene1609(YALI0_B17776g),gene1730(YALI0_B20526g),gene1759(YALI0_B21142g),gene2185(YALI0_C07348g),gene2293(YALI0_C09823g),gene2396(YALI0_C12232g),gene2397(YALI0_C12254g),gene2530(YALI0_C15488g),gene2556(YALI0_C16225g),gene2655(YALI0_C18623g),gene2731(YALI0_C20295g),gene2777(YALI0_C21406g),gene2831(YALI0_…
BP	GO:0007005	mitochondrion organization	5	55	60	127	0.00062	0.037149	gene1036(YALI0_B04598g),gene2723(YALI0_C20119g),gene5173(YALI0_E24453g),gene5814(YALI0_F03432g),gene6753(YALI0_F24431g)	gene1270(YALI0_B10197g),gene1305(YALI0_B10978g),gene1391(YALI0_B12958g),gene1588(YALI0_B17314g),gene1646(YALI0_B18590g),gene1656(YALI0_B18810g),gene1692(YALI0_B19646g),gene2168(YALI0_C06974g),gene2272(YALI0_C09350g),gene2466(YALI0_C14036g),gene2576(YALI0_C16731g),gene2637(YALI0_C18227g),gene2651(YALI0_C18513g),gene278(YALI0_A07084g),gene2795(YALI0_C21780g),gene2836(YALI0_C22704g),gene2947(YALI0_D…
MF	GO:0016638	oxidoreductase activity, acting on the CH-NH2 group of donors	9	1	10	12	0.00073	0.0431489	gene1706(YALI0_B19998g),gene2641(YALI0_C18315g),gene2841(YALI0_C22792g),gene389(YALI0_A09856g),gene4513(YALI0_E09603g),gene6121(YALI0_F10197g),gene636(YALI0_A16445g),gene6458(YALI0_F17820g),gene7017(YALI0_F30591g)	gene3544(YALI0_D14322g)
BP	GO:0043414	macromolecule methylation	2	37	39	76	0.00078	0.0454896	gene11(YALI0_A00369g),gene990(YALI0_B03498g)	gene1044(YALI0_B04774g),gene1201(YALI0_B08624g),gene1288(YALI0_B10582g),gene1647(YALI0_B18612g),gene1688(YALI0_B19558g),gene1760(YALI0_B21164g),gene2460(YALI0_C13882g),gene3150(YALI0_D05489g),gene3341(YALI0_D09691g),gene3367(YALI0_D10234g),gene3403(YALI0_D10989g),gene3486(YALI0_D12837g),gene3487(YALI0_D12859g),gene3854(YALI0_D21684g),gene3874(YALI0_D22220g),gene4002(YALI0_D25212g),gene4125(YALI0_…
BP	GO:0006626	protein targeting to mitochondrion	0	23	23	39	0.00082	0.0465438	-	gene1305(YALI0_B10978g),gene1391(YALI0_B12958g),gene2168(YALI0_C06974g),gene2651(YALI0_C18513g),gene278(YALI0_A07084g),gene2795(YALI0_C21780g),gene2947(YALI0_D00715g),gene3108(YALI0_D04554g),gene3214(YALI0_D06908g),gene3831(YALI0_D21142g),gene394(YALI0_A09988g),gene4321(YALI0_E05115g),gene4372(YALI0_E06237g),gene4731(YALI0_E14487g),gene4759(YALI0_E15136g),gene5457(YALI0_E30745g),gene5798(YALI0_F0…
BP	GO:0019395	fatty acid oxidation	13	1	14	20	0.00083	0.0465438	gene1280(YALI0_B10406g),gene2890(YALI0_C23859g),gene2922(YALI0_D00176g),gene3984(YALI0_D24750g),gene4385(YALI0_E06567g),gene4581(YALI0_E11099g),gene4905(YALI0_E18568g),gene5313(YALI0_E27654g),gene5562(YALI0_E32835g),gene6147(YALI0_F10857g),gene6653(YALI0_F22121g),gene6937(YALI0_F28567g),gene794(YALI0_A20207g)	gene1198(YALI0_B08536g)
BP	GO:0034440	lipid oxidation	13	1	14	20	0.00083	0.0465438	gene1280(YALI0_B10406g),gene2890(YALI0_C23859g),gene2922(YALI0_D00176g),gene3984(YALI0_D24750g),gene4385(YALI0_E06567g),gene4581(YALI0_E11099g),gene4905(YALI0_E18568g),gene5313(YALI0_E27654g),gene5562(YALI0_E32835g),gene6147(YALI0_F10857g),gene6653(YALI0_F22121g),gene6937(YALI0_F28567g),gene794(YALI0_A20207g)	gene1198(YALI0_B08536g)
BP	GO:0006573	valine metabolic process	3	5	8	9	0.00094	0.0520451	gene1945(YALI0_C01859g),gene2972(YALI0_D01265g),gene5778(YALI0_F02607g)	gene1096(YALI0_B06006g),gene1876(YALI0_C00253g),gene3050(YALI0_D03135g),gene3181(YALI0_D06215g),gene6599(YALI0_F20900g)
BP	GO:0009065	glutamine family amino acid catabolic process	5	1	6	6	0.00134	0.0714776	gene1244(YALI0_B09625g),gene1245(YALI0_B09647g),gene2057(YALI0_C04433g),gene4425(YALI0_E07535g),gene4513(YALI0_E09603g)	gene6044(YALI0_F08415g)
BP	GO:0045039	protein import into mitochondrial inner membrane	0	6	6	6	0.00134	0.0714776	-	gene2795(YALI0_C21780g),gene3214(YALI0_D06908g),gene4321(YALI0_E05115g),gene4372(YALI0_E06237g),gene6909(YALI0_F27929g),gene6985(YALI0_F29931g)
CC	GO:0034388	Pwp2p-containing subcomplex of 90S preribosome	0	6	6	6	0.00134	0.0714776	-	gene1411(YALI0_B13442g),gene1906(YALI0_C00913g),gene5522(YALI0_E32043g),gene6302(YALI0_F14377g),gene7058(YALI0_F31471g),gene889(YALI0_B01078g)
BP	GO:0032787	monocarboxylic acid metabolic process	30	20	50	105	0.0014	0.0737783	gene1153(YALI0_B07359g),gene1280(YALI0_B10406g),gene1661(YALI0_B18898g),gene1681(YALI0_B19360g),gene1813(YALI0_B22308g),gene1822(YALI0_B22506g),gene2246(YALI0_C08811g),gene2890(YALI0_C23859g),gene2922(YALI0_D00176g),gene3589(YALI0_D15400g),gene3747(YALI0_D19140g),gene3984(YALI0_D24750g),gene4236(YALI0_E03212g),gene4385(YALI0_E06567g),gene4581(YALI0_E11099g),gene4722(YALI0_E14256g),gene4773(YALI0_…	gene1096(YALI0_B06006g),gene1198(YALI0_B08536g),gene1485(YALI0_B15059g),gene1682(YALI0_B19382g),gene1704(YALI0_B19976g),gene2214(YALI0_C08074g),gene2360(YALI0_C11407g),gene3972(YALI0_D24431g),gene411(YALI0_A10362g),gene4908(YALI0_E18634g),gene520(YALI0_A13387g),gene5467(YALI0_E30965g),gene5650(YALI0_E34793g),gene5930(YALI0_F05962g),gene5970(YALI0_F06754g),gene6599(YALI0_F20900g),gene6919(YALI0_F2…
BP	GO:0015849	organic acid transport	28	13	41	83	0.00154	0.0792466	gene1240(YALI0_B09537g),gene1551(YALI0_B16522g),gene1680(YALI0_B19338g),gene1685(YALI0_B19470g),gene2390(YALI0_C12100g),gene2584(YALI0_C16907g),gene2598(YALI0_C17237g),gene2865(YALI0_C23298g),gene2937(YALI0_D00495g),gene297(YALI0_A07579g),gene3004(YALI0_D02046g),gene3209(YALI0_D06798g),gene3323(YALI0_D09295g),gene3590(YALI0_D15422g),gene3684(YALI0_D17688g),gene3770(YALI0_D19646g),gene4412(YALI0_E…	gene1294(YALI0_B10736g),gene1709(YALI0_B20064g),gene2293(YALI0_C09823g),gene2530(YALI0_C15488g),gene2629(YALI0_C18051g),gene2777(YALI0_C21406g),gene3788(YALI0_D20108g),gene4501(YALI0_E09284g),gene5975(YALI0_F06842g),gene5986(YALI0_F07106g),gene652(YALI0_A16863g),gene6552(YALI0_F19866g),gene767(YALI0_A19558g)
BP	GO:0046942	carboxylic acid transport	28	13	41	83	0.00154	0.0792466	gene1240(YALI0_B09537g),gene1551(YALI0_B16522g),gene1680(YALI0_B19338g),gene1685(YALI0_B19470g),gene2390(YALI0_C12100g),gene2584(YALI0_C16907g),gene2598(YALI0_C17237g),gene2865(YALI0_C23298g),gene2937(YALI0_D00495g),gene297(YALI0_A07579g),gene3004(YALI0_D02046g),gene3209(YALI0_D06798g),gene3323(YALI0_D09295g),gene3590(YALI0_D15422g),gene3684(YALI0_D17688g),gene3770(YALI0_D19646g),gene4412(YALI0_E…	gene1294(YALI0_B10736g),gene1709(YALI0_B20064g),gene2293(YALI0_C09823g),gene2530(YALI0_C15488g),gene2629(YALI0_C18051g),gene2777(YALI0_C21406g),gene3788(YALI0_D20108g),gene4501(YALI0_E09284g),gene5975(YALI0_F06842g),gene5986(YALI0_F07106g),gene652(YALI0_A16863g),gene6552(YALI0_F19866g),gene767(YALI0_A19558g)
BP	GO:0055088	lipid homeostasis	7	3	10	13	0.00159	0.0793976	gene2890(YALI0_C23859g),gene3984(YALI0_D24750g),gene4105(YALI0_E00330g),gene4385(YALI0_E06567g),gene5313(YALI0_E27654g),gene5655(YALI0_E34881g),gene6147(YALI0_F10857g)	gene3691(YALI0_D17842g),gene5352(YALI0_E28512g),gene6139(YALI0_F10615g)
CC	GO:0030529	intracellular ribonucleoprotein complex	10	149	159	397	0.00161	0.0793976	gene1752(YALI0_B20988g),gene2526(YALI0_C15400g),gene317(YALI0_A08063g),gene3497(YALI0_D13104g),gene4353(YALI0_E05819g),gene4445(YALI0_E08074g),gene5511(YALI0_E31823g),gene6066(YALI0_F08943g),gene6765(YALI0_F24717g),gene6794(YALI0_F25399g)	gene1002(YALI0_B03784g),gene1043(YALI0_B04752g),gene1079(YALI0_B05632g),gene1101(YALI0_B06116g),gene1118(YALI0_B06578g),gene114(YALI0_A02849g),gene1177(YALI0_B08074g),gene121(YALI0_A03003g),gene1220(YALI0_B09075g),gene1264(YALI0_B10065g),gene1271(YALI0_B10219g),gene1284(YALI0_B10494g),gene1306(YALI0_B11000g),gene1363(YALI0_B12320g),gene1411(YALI0_B13442g),gene1422(YALI0_B13706g),gene1429(YALI0_B1…
CC	GO:1990904	ribonucleoprotein complex	13	151	164	411	0.00165	0.0793976	gene1752(YALI0_B20988g),gene2526(YALI0_C15400g),gene317(YALI0_A08063g),gene3497(YALI0_D13104g),gene4353(YALI0_E05819g),gene4445(YALI0_E08074g),gene5133(YALI0_E23628g),gene5511(YALI0_E31823g),gene5728(YALI0_F01474g),gene6066(YALI0_F08943g),gene6765(YALI0_F24717g),gene6794(YALI0_F25399g),gene792(YALI0_A20152g)	gene1002(YALI0_B03784g),gene1043(YALI0_B04752g),gene1079(YALI0_B05632g),gene1101(YALI0_B06116g),gene1118(YALI0_B06578g),gene114(YALI0_A02849g),gene1177(YALI0_B08074g),gene121(YALI0_A03003g),gene1220(YALI0_B09075g),gene1264(YALI0_B10065g),gene1271(YALI0_B10219g),gene1284(YALI0_B10494g),gene1306(YALI0_B11000g),gene1363(YALI0_B12320g),gene139(YALI0_A03509g),gene1411(YALI0_B13442g),gene1422(YALI0_B13…
BP	GO:0017004	cytochrome complex assembly	1	14	15	23	0.00166	0.0793976	gene6753(YALI0_F24431g)	gene2272(YALI0_C09350g),gene2424(YALI0_C12918g),gene2576(YALI0_C16731g),gene2637(YALI0_C18227g),gene3063(YALI0_D03509g),gene3992(YALI0_D24992g),gene4242(YALI0_E03344g),gene4371(YALI0_E06215g),gene4782(YALI0_E15686g),gene5640(YALI0_E34540g),gene6114(YALI0_F10054g),gene6259(YALI0_F13387g),gene6752(YALI0_F24409g),gene7079(YALI0_F32021g)
MF	GO:0003997	acyl-CoA oxidase activity	6	0	6	6	0.00167	0.0793976	gene2890(YALI0_C23859g),gene3984(YALI0_D24750g),gene4385(YALI0_E06567g),gene5313(YALI0_E27654g),gene5562(YALI0_E32835g),gene6147(YALI0_F10857g)	-
MF	GO:0005504	fatty acid binding	6	0	6	6	0.00167	0.0793976	gene2890(YALI0_C23859g),gene3945(YALI0_D23815g),gene3984(YALI0_D24750g),gene4385(YALI0_E06567g),gene5313(YALI0_E27654g),gene6147(YALI0_F10857g)	-
MF	GO:0016408	C-acyltransferase activity	3	3	6	6	0.00167	0.0793976	gene2922(YALI0_D00176g),gene4581(YALI0_E11099g),gene4905(YALI0_E18568g)	gene1198(YALI0_B08536g),gene1485(YALI0_B15059g),gene1682(YALI0_B19382g)
CC	GO:1905354	exoribonuclease complex	0	12	12	17	0.00178	0.0837174	-	gene1197(YALI0_B08514g),gene233(YALI0_A05995g),gene2506(YALI0_C15048g),gene3151(YALI0_D05511g),gene3208(YALI0_D06776g),gene3404(YALI0_D11000g),gene3727(YALI0_D18700g),gene4291(YALI0_E04444g),gene5304(YALI0_E27390g),gene5574(YALI0_E33121g),gene6337(YALI0_F15147g),gene6569(YALI0_F20240g)
MF	GO:0016627	oxidoreductase activity, acting on the CH-CH group of donors	11	9	20	33	0.00184	0.0856187	gene1051(YALI0_B04906g),gene2579(YALI0_C16797g),gene2890(YALI0_C23859g),gene3603(YALI0_D15708g),gene3984(YALI0_D24750g),gene4385(YALI0_E06567g),gene4650(YALI0_E12573g),gene5313(YALI0_E27654g),gene5562(YALI0_E32835g),gene6147(YALI0_F10857g),gene6722(YALI0_F23749g)	gene1485(YALI0_B15059g),gene1776(YALI0_B21516g),gene1859(YALI0_B23298g),gene3926(YALI0_D23397g),gene5241(YALI0_E26048g),gene5242(YALI0_E26059g),gene5421(YALI0_E29975g),gene6762(YALI0_F24651g),gene6959(YALI0_F29205g)
CC	GO:0044452	nucleolar part	0	27	27	50	0.00186	0.0856383	-	gene1043(YALI0_B04752g),gene1048(YALI0_B04851g),gene1264(YALI0_B10065g),gene1363(YALI0_B12320g),gene1411(YALI0_B13442g),gene1906(YALI0_C00913g),gene2836(YALI0_C22704g),gene3193(YALI0_D06457g),gene321(YALI0_A08151g),gene3947(YALI0_D23859g),gene4326(YALI0_E05225g),gene4524(YALI0_E09845g),gene5149(YALI0_E23947g),gene5257(YALI0_E26389g),gene5267(YALI0_E26587g),gene5377(YALI0_E29007g),gene5400(YALI0_E…
MF	GO:0050662	coenzyme binding	32	25	57	120	0.0019	0.0865687	gene1176(YALI0_B08052g),gene1244(YALI0_B09625g),gene1706(YALI0_B19998g),gene1822(YALI0_B22506g),gene1865(YALI0_B23430g),gene2246(YALI0_C08811g),gene2579(YALI0_C16797g),gene2728(YALI0_C20251g),gene2890(YALI0_C23859g),gene292(YALI0_A07425g),gene3016(YALI0_D02321g),gene3215(YALI0_D06930g),gene3221(YALI0_D07062g),gene3303(YALI0_D08844g),gene3603(YALI0_D15708g),gene3945(YALI0_D23815g),gene3984(YALI0_D…	gene1436(YALI0_B14014g),gene1536(YALI0_B16192g),gene1704(YALI0_B19976g),gene1776(YALI0_B21516g),gene1876(YALI0_C00253g),gene2214(YALI0_C08074g),gene3009(YALI0_D02145g),gene3102(YALI0_D04422g),gene3143(YALI0_D05335g),gene3362(YALI0_D10131g),gene356(YALI0_A09042g),gene3612(YALI0_D15928g),gene3687(YALI0_D17754g),gene3815(YALI0_D20724g),gene4031(YALI0_D25894g),gene4402(YALI0_E06941g),gene4450(YALI0_E…
BP	GO:0009064	glutamine family amino acid metabolic process	12	7	19	32	0.00208	0.093793	gene1153(YALI0_B07359g),gene1244(YALI0_B09625g),gene1245(YALI0_B09647g),gene1706(YALI0_B19998g),gene2057(YALI0_C04433g),gene3493(YALI0_D13024g),gene4425(YALI0_E07535g),gene4513(YALI0_E09603g),gene5079(YALI0_E22484g),gene5685(YALI0_F00506g),gene6458(YALI0_F17820g),gene753(YALI0_A19206g)	gene212(YALI0_A05379g),gene3234(YALI0_D07370g),gene3568(YALI0_D14894g),gene4509(YALI0_E09493g),gene520(YALI0_A13387g),gene6044(YALI0_F08415g),gene6919(YALI0_F28149g)
MF	GO:0004032	alditol:NADP+ 1-oxidoreductase activity	9	1	10	13	0.00217	0.0949158	gene1142(YALI0_B07117g),gene1494(YALI0_B15268g),gene1790(YALI0_B21780g),gene2262(YALI0_C09119g),gene2443(YALI0_C13508g),gene3087(YALI0_D04092g),gene4896(YALI0_E18348g),gene5980(YALI0_F06974g),gene614(YALI0_A15906g)	gene1879(YALI0_C00319g)
MF	GO:0004033	aldo-keto reductase (NADP) activity	9	1	10	13	0.00217	0.0949158	gene1142(YALI0_B07117g),gene1494(YALI0_B15268g),gene1790(YALI0_B21780g),gene2262(YALI0_C09119g),gene2443(YALI0_C13508g),gene3087(YALI0_D04092g),gene4896(YALI0_E18348g),gene5980(YALI0_F06974g),gene614(YALI0_A15906g)	gene1879(YALI0_C00319g)
MF	GO:0008106	alcohol dehydrogenase (NADP+) activity	9	1	10	13	0.00217	0.0949158	gene1142(YALI0_B07117g),gene1494(YALI0_B15268g),gene1790(YALI0_B21780g),gene2262(YALI0_C09119g),gene2443(YALI0_C13508g),gene3087(YALI0_D04092g),gene4896(YALI0_E18348g),gene5980(YALI0_F06974g),gene614(YALI0_A15906g)	gene1879(YALI0_C00319g)
CC	GO:0005740	mitochondrial envelope	11	76	87	204	0.0025	0.107668	gene1215(YALI0_B08965g),gene2497(YALI0_C14806g),gene2888(YALI0_C23815g),gene4127(YALI0_E00814g),gene5243(YALI0_E26081g),gene5655(YALI0_E34881g),gene6010(YALI0_F07667g),gene6545(YALI0_F19712g),gene6603(YALI0_F20988g),gene6753(YALI0_F24431g),gene6901(YALI0_F27753g)	gene1274(YALI0_B10274g),gene1305(YALI0_B10978g),gene1391(YALI0_B12958g),gene1402(YALI0_B13222g),gene1513(YALI0_B15664g),gene1522(YALI0_B15884g),gene1530(YALI0_B16060g),gene1646(YALI0_B18590g),gene1692(YALI0_B19646g),gene204(YALI0_A05137g),gene2168(YALI0_C06974g),gene2272(YALI0_C09350g),gene2344(YALI0_C11011g),gene2424(YALI0_C12918g),gene2636(YALI0_C18205g),gene2651(YALI0_C18513g),gene2680(YALI0_C…
MF	GO:0031406	carboxylic acid binding	9	3	12	17	0.00256	0.107668	gene2890(YALI0_C23859g),gene3886(YALI0_D22484g),gene389(YALI0_A09856g),gene3945(YALI0_D23815g),gene3984(YALI0_D24750g),gene4385(YALI0_E06567g),gene4809(YALI0_E16346g),gene5313(YALI0_E27654g),gene6147(YALI0_F10857g)	gene1757(YALI0_B21098g),gene3568(YALI0_D14894g),gene4509(YALI0_E09493g)
MF	GO:0043177	organic acid binding	9	3	12	17	0.00256	0.107668	gene2890(YALI0_C23859g),gene3886(YALI0_D22484g),gene389(YALI0_A09856g),gene3945(YALI0_D23815g),gene3984(YALI0_D24750g),gene4385(YALI0_E06567g),gene4809(YALI0_E16346g),gene5313(YALI0_E27654g),gene6147(YALI0_F10857g)	gene1757(YALI0_B21098g),gene3568(YALI0_D14894g),gene4509(YALI0_E09493g)
BP	GO:0000462	maturation of SSU-rRNA from tricistronic rRNA transcript (SSU-rRNA, 5.8S rRNA, LSU-rRNA)	0	17	17	28	0.00256	0.107668	-	gene1002(YALI0_B03784g),gene1016(YALI0_B04136g),gene2799(YALI0_C21846g),gene3426(YALI0_D11462g),gene3537(YALI0_D14080g),gene4063(YALI0_D26620g),gene4552(YALI0_E10439g),gene4715(YALI0_E14124g),gene4772(YALI0_E15466g),gene5400(YALI0_E29506g),gene5522(YALI0_E32043g),gene5892(YALI0_F05170g),gene6054(YALI0_F08657g),gene6105(YALI0_F09856g),gene6302(YALI0_F14377g),gene836(YALI0_A21197g),gene889(YALI0_B0…
BP	GO:0006855	drug transmembrane transport	16	5	21	37	0.00267	0.110175	gene1194(YALI0_B08448g),gene1903(YALI0_C00847g),gene2059(YALI0_C04477g),gene2201(YALI0_C07722g),gene2593(YALI0_C17105g),gene293(YALI0_A07447g),gene3819(YALI0_D20834g),gene4066(YALI0_D26730g),gene454(YALI0_A11605g),gene5025(YALI0_E21241g),gene5292(YALI0_E27159g),gene5831(YALI0_F03795g),gene5984(YALI0_F07062g),gene6027(YALI0_F08063g),gene6275(YALI0_F13739g),gene6803(YALI0_F25597g)	gene1609(YALI0_B17776g),gene1759(YALI0_B21142g),gene3865(YALI0_D22000g),gene5794(YALI0_F02959g),gene6284(YALI0_F13981g)
BP	GO:0015893	drug transport	16	5	21	37	0.00267	0.110175	gene1194(YALI0_B08448g),gene1903(YALI0_C00847g),gene2059(YALI0_C04477g),gene2201(YALI0_C07722g),gene2593(YALI0_C17105g),gene293(YALI0_A07447g),gene3819(YALI0_D20834g),gene4066(YALI0_D26730g),gene454(YALI0_A11605g),gene5025(YALI0_E21241g),gene5292(YALI0_E27159g),gene5831(YALI0_F03795g),gene5984(YALI0_F07062g),gene6027(YALI0_F08063g),gene6275(YALI0_F13739g),gene6803(YALI0_F25597g)	gene1609(YALI0_B17776g),gene1759(YALI0_B21142g),gene3865(YALI0_D22000g),gene5794(YALI0_F02959g),gene6284(YALI0_F13981g)
MF	GO:0003723	RNA binding	16	145	161	393	0.00286	0.116913	gene2092(YALI0_C05324g),gene2526(YALI0_C15400g),gene3153(YALI0_D05547g),gene317(YALI0_A08063g),gene4353(YALI0_E05819g),gene4445(YALI0_E08074g),gene5133(YALI0_E23628g),gene5728(YALI0_F01474g),gene6066(YALI0_F08943g),gene6241(YALI0_F13035g),gene6719(YALI0_F23683g),gene6765(YALI0_F24717g),gene6814(YALI0_F25839g),gene708(YALI0_A18161g),gene753(YALI0_A19206g),gene792(YALI0_A20152g)	gene1016(YALI0_B04136g),gene1092(YALI0_B05918g),gene1101(YALI0_B06116g),gene1118(YALI0_B06578g),gene1271(YALI0_B10219g),gene1273(YALI0_B10263g),gene1284(YALI0_B10494g),gene1288(YALI0_B10582g),gene1349(YALI0_B11968g),gene1361(YALI0_B12276g),gene139(YALI0_A03509g),gene1429(YALI0_B13860g),gene149(YALI0_A03773g),gene1515(YALI0_B15708g),gene154(YALI0_A03905g),gene1568(YALI0_B16896g),gene1639(YALI0_B18…
MF	GO:0016634	oxidoreductase activity, acting on the CH-CH group of donors, oxygen as acceptor	6	1	7	8	0.00321	0.130005	gene2890(YALI0_C23859g),gene3984(YALI0_D24750g),gene4385(YALI0_E06567g),gene5313(YALI0_E27654g),gene5562(YALI0_E32835g),gene6147(YALI0_F10857g)	gene5421(YALI0_E29975g)
BP	GO:0043603	cellular amide metabolic process	24	112	136	339	0.00342	0.137239	gene1153(YALI0_B07359g),gene1661(YALI0_B18898g),gene1901(YALI0_C00803g),gene2551(YALI0_C16049g),gene2787(YALI0_C21604g),gene2881(YALI0_C23661g),gene317(YALI0_A08063g),gene3266(YALI0_D08052g),gene3497(YALI0_D13104g),gene3589(YALI0_D15400g),gene3712(YALI0_D18337g),gene3886(YALI0_D22484g),gene3921(YALI0_D23309g),gene4138(YALI0_E01056g),gene4809(YALI0_E16346g),gene5427(YALI0_E30129g),gene5968(YALI0_F…	gene1092(YALI0_B05918g),gene1096(YALI0_B06006g),gene1101(YALI0_B06116g),gene1118(YALI0_B06578g),gene114(YALI0_A02849g),gene121(YALI0_A03003g),gene1284(YALI0_B10494g),gene1305(YALI0_B10978g),gene1306(YALI0_B11000g),gene1482(YALI0_B14993g),gene1515(YALI0_B15708g),gene1607(YALI0_B17732g),gene1660(YALI0_B18876g),gene1757(YALI0_B21098g),gene1797(YALI0_B21978g),gene1826(YALI0_B22594g),gene2207(YALI0_C0…
BP	GO:0072329	monocarboxylic acid catabolic process	18	4	22	40	0.00362	0.143944	gene1280(YALI0_B10406g),gene1822(YALI0_B22506g),gene2890(YALI0_C23859g),gene2922(YALI0_D00176g),gene3984(YALI0_D24750g),gene4236(YALI0_E03212g),gene4385(YALI0_E06567g),gene4581(YALI0_E11099g),gene4722(YALI0_E14256g),gene4891(YALI0_E18238g),gene4905(YALI0_E18568g),gene5313(YALI0_E27654g),gene5562(YALI0_E32835g),gene6147(YALI0_F10857g),gene6653(YALI0_F22121g),gene6831(YALI0_F26191g),gene6937(YALI0_…	gene1198(YALI0_B08536g),gene1704(YALI0_B19976g),gene2214(YALI0_C08074g),gene6945(YALI0_F28765g)
MF	GO:0016874	ligase activity	14	21	35	69	0.0037	0.1458	gene1464(YALI0_B14619g),gene2723(YALI0_C20119g),gene3493(YALI0_D13024g),gene3569(YALI0_D14916g),gene4138(YALI0_E01056g),gene4414(YALI0_E07271g),gene4651(YALI0_E12595g),gene4795(YALI0_E16016g),gene5427(YALI0_E30129g),gene5685(YALI0_F00506g),gene5708(YALI0_F01034g),gene5849(YALI0_F04147g),gene6604(YALI0_F21010g),gene852(YALI0_B00220g)	gene1096(YALI0_B06006g),gene2333(YALI0_C10780g),gene2360(YALI0_C11407g),gene2631(YALI0_C18095g),gene2645(YALI0_C18425g),gene3067(YALI0_D03619g),gene3234(YALI0_D07370g),gene396(YALI0_A10032g),gene4509(YALI0_E09493g),gene4877(YALI0_E17919g),gene4880(YALI0_E17985g),gene520(YALI0_A13387g),gene5383(YALI0_E29139g),gene5663(YALI0_E35156g),gene5766(YALI0_F02299g),gene5930(YALI0_F05962g),gene6310(YALI0_F1…
CC	GO:0000178	exosome (RNase complex)	0	11	11	16	0.00387	0.150961	-	gene1197(YALI0_B08514g),gene233(YALI0_A05995g),gene2506(YALI0_C15048g),gene3151(YALI0_D05511g),gene3208(YALI0_D06776g),gene3404(YALI0_D11000g),gene4291(YALI0_E04444g),gene5304(YALI0_E27390g),gene5574(YALI0_E33121g),gene6337(YALI0_F15147g),gene6569(YALI0_F20240g)
BP	GO:0030150	protein import into mitochondrial matrix	0	11	11	16	0.0039	0.150961	-	gene1391(YALI0_B12958g),gene2651(YALI0_C18513g),gene278(YALI0_A07084g),gene2947(YALI0_D00715g),gene3831(YALI0_D21142g),gene4759(YALI0_E15136g),gene5798(YALI0_F03047g),gene5838(YALI0_F03949g),gene6909(YALI0_F27929g),gene6958(YALI0_F29183g),gene7046(YALI0_F31207g)
BP	GO:0033540	fatty acid beta-oxidation using acyl-CoA oxidase	5	0	5	5	0.00405	0.154041	gene2890(YALI0_C23859g),gene3984(YALI0_D24750g),gene4385(YALI0_E06567g),gene5313(YALI0_E27654g),gene6147(YALI0_F10857g)	-
BP	GO:0034227	tRNA thio-modification	1	4	5	5	0.00405	0.154041	gene4947(YALI0_E19481g)	gene1273(YALI0_B10263g),gene2631(YALI0_C18095g),gene3680(YALI0_D17600g),gene6780(YALI0_F25069g)
MF	GO:0019842	vitamin binding	22	6	28	53	0.00436	0.164402	gene1537(YALI0_B16214g),gene1681(YALI0_B19360g),gene2057(YALI0_C04433g),gene2088(YALI0_C05258g),gene2109(YALI0_C05709g),gene2942(YALI0_D00605g),gene2952(YALI0_D00825g),gene3186(YALI0_D06325g),gene3215(YALI0_D06930g),gene344(YALI0_A08734g),gene3671(YALI0_D17402g),gene3886(YALI0_D22484g),gene389(YALI0_A09856g),gene4000(YALI0_D25168g),gene4458(YALI0_E08360g),gene4809(YALI0_E16346g),gene4859(YALI0_E1…	gene1757(YALI0_B21098g),gene1876(YALI0_C00253g),gene2803(YALI0_C21934g),gene3023(YALI0_D02497g),gene3362(YALI0_D10131g),gene6044(YALI0_F08415g)
MF	GO:0008509	anion transmembrane transporter activity	30	15	45	94	0.00459	0.171595	gene1240(YALI0_B09537g),gene1551(YALI0_B16522g),gene1616(YALI0_B17930g),gene1680(YALI0_B19338g),gene1685(YALI0_B19470g),gene2195(YALI0_C07590g),gene2390(YALI0_C12100g),gene2584(YALI0_C16907g),gene2598(YALI0_C17237g),gene2718(YALI0_C20053g),gene2865(YALI0_C23298g),gene3004(YALI0_D02046g),gene3209(YALI0_D06798g),gene3323(YALI0_D09295g),gene3590(YALI0_D15422g),gene3770(YALI0_D19646g),gene3959(YALI0_…	gene1294(YALI0_B10736g),gene1709(YALI0_B20064g),gene2293(YALI0_C09823g),gene2530(YALI0_C15488g),gene2629(YALI0_C18051g),gene2777(YALI0_C21406g),gene3788(YALI0_D20108g),gene422(YALI0_A10659g),gene4487(YALI0_E09015g),gene4501(YALI0_E09284g),gene5975(YALI0_F06842g),gene5986(YALI0_F07106g),gene652(YALI0_A16863g),gene6552(YALI0_F19866g),gene6690(YALI0_F23023g)
MF	GO:0003735	structural constituent of ribosome	2	64	66	147	0.00495	0.183486	gene3497(YALI0_D13104g),gene6794(YALI0_F25399g)	gene1101(YALI0_B06116g),gene1118(YALI0_B06578g),gene114(YALI0_A02849g),gene1177(YALI0_B08074g),gene121(YALI0_A03003g),gene1220(YALI0_B09075g),gene1284(YALI0_B10494g),gene1306(YALI0_B11000g),gene1482(YALI0_B14993g),gene1607(YALI0_B17732g),gene1826(YALI0_B22594g),gene2207(YALI0_C07887g),gene2242(YALI0_C08723g),gene2334(YALI0_C10802g),gene2451(YALI0_C13706g),gene252(YALI0_A06501g),gene2633(YALI0_C18…
BP	GO:0044242	cellular lipid catabolic process	21	4	25	48	0.0052	0.191133	gene1280(YALI0_B10406g),gene2890(YALI0_C23859g),gene2922(YALI0_D00176g),gene3272(YALI0_D08206g),gene3984(YALI0_D24750g),gene4095(YALI0_E00110g),gene4385(YALI0_E06567g),gene4581(YALI0_E11099g),gene4797(YALI0_E16060g),gene4905(YALI0_E18568g),gene5313(YALI0_E27654g),gene5498(YALI0_E31603g),gene5562(YALI0_E32835g),gene5665(YALI0_E35222g),gene5950(YALI0_F06358g),gene6036(YALI0_F08217g),gene6147(YALI0_…	gene1198(YALI0_B08536g),gene490(YALI0_A12573g),gene6811(YALI0_F25773g),gene919(YALI0_B01771g)
BP	GO:0042493	response to drug	16	5	21	39	0.00618	0.225261	gene1194(YALI0_B08448g),gene1903(YALI0_C00847g),gene2059(YALI0_C04477g),gene2201(YALI0_C07722g),gene2593(YALI0_C17105g),gene293(YALI0_A07447g),gene3819(YALI0_D20834g),gene4066(YALI0_D26730g),gene454(YALI0_A11605g),gene5025(YALI0_E21241g),gene5292(YALI0_E27159g),gene5831(YALI0_F03795g),gene5984(YALI0_F07062g),gene6027(YALI0_F08063g),gene6275(YALI0_F13739g),gene6803(YALI0_F25597g)	gene1609(YALI0_B17776g),gene1759(YALI0_B21142g),gene3865(YALI0_D22000g),gene5794(YALI0_F02959g),gene6284(YALI0_F13981g)
BP	GO:0006631	fatty acid metabolic process	16	10	26	51	0.00638	0.230629	gene1280(YALI0_B10406g),gene2246(YALI0_C08811g),gene2890(YALI0_C23859g),gene2922(YALI0_D00176g),gene3984(YALI0_D24750g),gene4385(YALI0_E06567g),gene4581(YALI0_E11099g),gene4795(YALI0_E16016g),gene4905(YALI0_E18568g),gene5313(YALI0_E27654g),gene5562(YALI0_E32835g),gene6147(YALI0_F10857g),gene6653(YALI0_F22121g),gene6937(YALI0_F28567g),gene748(YALI0_A19096g),gene794(YALI0_A20207g)	gene1198(YALI0_B08536g),gene1485(YALI0_B15059g),gene1682(YALI0_B19382g),gene2360(YALI0_C11407g),gene3972(YALI0_D24431g),gene411(YALI0_A10362g),gene5467(YALI0_E30965g),gene5650(YALI0_E34793g),gene5970(YALI0_F06754g),gene7021(YALI0_F30679g)
BP	GO:0043604	amide biosynthetic process	15	109	124	311	0.00652	0.233758	gene1661(YALI0_B18898g),gene1901(YALI0_C00803g),gene2551(YALI0_C16049g),gene2787(YALI0_C21604g),gene2881(YALI0_C23661g),gene317(YALI0_A08063g),gene3266(YALI0_D08052g),gene3497(YALI0_D13104g),gene3589(YALI0_D15400g),gene4138(YALI0_E01056g),gene5427(YALI0_E30129g),gene6241(YALI0_F13035g),gene6794(YALI0_F25399g),gene792(YALI0_A20152g),gene903(YALI0_B01408g)	gene1092(YALI0_B05918g),gene1096(YALI0_B06006g),gene1101(YALI0_B06116g),gene1118(YALI0_B06578g),gene114(YALI0_A02849g),gene121(YALI0_A03003g),gene1284(YALI0_B10494g),gene1306(YALI0_B11000g),gene1482(YALI0_B14993g),gene1515(YALI0_B15708g),gene1607(YALI0_B17732g),gene1757(YALI0_B21098g),gene1797(YALI0_B21978g),gene1826(YALI0_B22594g),gene2207(YALI0_C07887g),gene2242(YALI0_C08723g),gene2333(YALI0_C1…
BP	GO:0018202	peptidyl-histidine modification	1	5	6	7	0.00673	0.237395	gene6059(YALI0_F08789g)	gene4384(YALI0_E06545g),gene6310(YALI0_F14553g),gene6650(YALI0_F22055g),gene6776(YALI0_F24981g),gene785(YALI0_A19954g)
BP	GO:0043633	polyadenylation-dependent RNA catabolic process	0	6	6	7	0.00673	0.237395	-	gene1197(YALI0_B08514g),gene3151(YALI0_D05511g),gene3404(YALI0_D11000g),gene4291(YALI0_E04444g),gene5574(YALI0_E33121g),gene669(YALI0_A17292g)
BP	GO:0090501	RNA phosphodiester bond hydrolysis	4	34	38	81	0.00688	0.240745	gene1775(YALI0_B21494g),gene494(YALI0_A12705g),gene6814(YALI0_F25839g),gene6846(YALI0_F26543g)	gene1002(YALI0_B03784g),gene1016(YALI0_B04136g),gene1043(YALI0_B04752g),gene1197(YALI0_B08514g),gene2029(YALI0_C03784g),gene218(YALI0_A05555g),gene2506(YALI0_C15048g),gene253(YALI0_A06523g),gene3131(YALI0_D05071g),gene3151(YALI0_D05511g),gene321(YALI0_A08151g),gene3404(YALI0_D11000g),gene3524(YALI0_D13750g),gene3571(YALI0_D14982g),gene3706(YALI0_D18150g),gene4291(YALI0_E04444g),gene4390(YALI0_E06…
MF	GO:0022857	transmembrane transporter activity	92	54	146	360	0.00695	0.241264	gene0(YALI0_A00110g),gene1019(YALI0_B04202g),gene1111(YALI0_B06391g),gene1204(YALI0_B08712g),gene1240(YALI0_B09537g),gene1358(YALI0_B12188g),gene1392(YALI0_B12980g),gene1551(YALI0_B16522g),gene157(YALI0_A03949g),gene1613(YALI0_B17864g),gene1616(YALI0_B17930g),gene1680(YALI0_B19338g),gene1685(YALI0_B19470g),gene1894(YALI0_C00627g),gene2071(YALI0_C04796g),gene2141(YALI0_C06424g),gene2149(YALI0_C065…	gene1294(YALI0_B10736g),gene1426(YALI0_B13794g),gene1530(YALI0_B16060g),gene1709(YALI0_B20064g),gene1781(YALI0_B21604g),gene2185(YALI0_C07348g),gene2293(YALI0_C09823g),gene2397(YALI0_C12254g),gene2483(YALI0_C14498g),gene2530(YALI0_C15488g),gene2629(YALI0_C18051g),gene2680(YALI0_C19195g),gene2731(YALI0_C20295g),gene2777(YALI0_C21406g),gene278(YALI0_A07084g),gene2831(YALI0_C22594g),gene2949(YALI0_D…
BP	GO:1903825	organic acid transmembrane transport	19	8	27	54	0.00766	0.253046	gene1240(YALI0_B09537g),gene1551(YALI0_B16522g),gene1680(YALI0_B19338g),gene1685(YALI0_B19470g),gene2390(YALI0_C12100g),gene2598(YALI0_C17237g),gene2865(YALI0_C23298g),gene3004(YALI0_D02046g),gene3209(YALI0_D06798g),gene3323(YALI0_D09295g),gene3590(YALI0_D15422g),gene3770(YALI0_D19646g),gene4856(YALI0_E17457g),gene5001(YALI0_E20713g),gene5565(YALI0_E32901g),gene5817(YALI0_F03498g),gene6812(YALI0_…	gene1709(YALI0_B20064g),gene2530(YALI0_C15488g),gene2777(YALI0_C21406g),gene3788(YALI0_D20108g),gene4501(YALI0_E09284g),gene5975(YALI0_F06842g),gene5986(YALI0_F07106g),gene6552(YALI0_F19866g)
BP	GO:1905039	carboxylic acid transmembrane transport	19	8	27	54	0.00766	0.253046	gene1240(YALI0_B09537g),gene1551(YALI0_B16522g),gene1680(YALI0_B19338g),gene1685(YALI0_B19470g),gene2390(YALI0_C12100g),gene2598(YALI0_C17237g),gene2865(YALI0_C23298g),gene3004(YALI0_D02046g),gene3209(YALI0_D06798g),gene3323(YALI0_D09295g),gene3590(YALI0_D15422g),gene3770(YALI0_D19646g),gene4856(YALI0_E17457g),gene5001(YALI0_E20713g),gene5565(YALI0_E32901g),gene5817(YALI0_F03498g),gene6812(YALI0_…	gene1709(YALI0_B20064g),gene2530(YALI0_C15488g),gene2777(YALI0_C21406g),gene3788(YALI0_D20108g),gene4501(YALI0_E09284g),gene5975(YALI0_F06842g),gene5986(YALI0_F07106g),gene6552(YALI0_F19866g)
MF	GO:0030170	pyridoxal phosphate binding	20	3	23	43	0.00776	0.253046	gene1537(YALI0_B16214g),gene1681(YALI0_B19360g),gene2057(YALI0_C04433g),gene2088(YALI0_C05258g),gene2109(YALI0_C05709g),gene2942(YALI0_D00605g),gene2952(YALI0_D00825g),gene3186(YALI0_D06325g),gene344(YALI0_A08734g),gene3671(YALI0_D17402g),gene3886(YALI0_D22484g),gene389(YALI0_A09856g),gene4000(YALI0_D25168g),gene4458(YALI0_E08360g),gene4809(YALI0_E16346g),gene4859(YALI0_E17545g),gene4891(YALI0_E1…	gene2803(YALI0_C21934g),gene3023(YALI0_D02497g),gene6044(YALI0_F08415g)
MF	GO:0070279	vitamin B6 binding	20	3	23	43	0.00776	0.253046	gene1537(YALI0_B16214g),gene1681(YALI0_B19360g),gene2057(YALI0_C04433g),gene2088(YALI0_C05258g),gene2109(YALI0_C05709g),gene2942(YALI0_D00605g),gene2952(YALI0_D00825g),gene3186(YALI0_D06325g),gene344(YALI0_A08734g),gene3671(YALI0_D17402g),gene3886(YALI0_D22484g),gene389(YALI0_A09856g),gene4000(YALI0_D25168g),gene4458(YALI0_E08360g),gene4809(YALI0_E16346g),gene4859(YALI0_E17545g),gene4891(YALI0_E1…	gene2803(YALI0_C21934g),gene3023(YALI0_D02497g),gene6044(YALI0_F08415g)
BP	GO:0007006	mitochondrial membrane organization	0	16	16	28	0.00778	0.253046	-	gene1692(YALI0_B19646g),gene2168(YALI0_C06974g),gene2466(YALI0_C14036g),gene278(YALI0_A07084g),gene2795(YALI0_C21780g),gene3108(YALI0_D04554g),gene3214(YALI0_D06908g),gene4144(YALI0_E01188g),gene4321(YALI0_E05115g),gene4372(YALI0_E06237g),gene5457(YALI0_E30745g),gene6259(YALI0_F13387g),gene6799(YALI0_F25509g),gene6909(YALI0_F27929g),gene6985(YALI0_F29931g),gene7079(YALI0_F32021g)
MF	GO:0016423	tRNA (guanine) methyltransferase activity	0	6	6	7	0.00823	0.253046	-	gene1688(YALI0_B19558g),gene2460(YALI0_C13882g),gene3150(YALI0_D05489g),gene3403(YALI0_D10989g),gene5456(YALI0_E30723g),gene6232(YALI0_F12771g)
MF	GO:0033293	monocarboxylic acid binding	6	0	6	7	0.00823	0.253046	gene2890(YALI0_C23859g),gene3945(YALI0_D23815g),gene3984(YALI0_D24750g),gene4385(YALI0_E06567g),gene5313(YALI0_E27654g),gene6147(YALI0_F10857g)	-
BP	GO:0006541	glutamine metabolic process	5	5	10	15	0.00826	0.253046	gene1153(YALI0_B07359g),gene1706(YALI0_B19998g),gene3493(YALI0_D13024g),gene5079(YALI0_E22484g),gene5685(YALI0_F00506g)	gene212(YALI0_A05379g),gene3234(YALI0_D07370g),gene4509(YALI0_E09493g),gene520(YALI0_A13387g),gene6919(YALI0_F28149g)
BP	GO:0008535	respiratory chain complex IV assembly	1	9	10	15	0.00826	0.253046	gene6753(YALI0_F24431g)	gene2272(YALI0_C09350g),gene2576(YALI0_C16731g),gene3992(YALI0_D24992g),gene4242(YALI0_E03344g),gene5640(YALI0_E34540g),gene6114(YALI0_F10054g),gene6259(YALI0_F13387g),gene6752(YALI0_F24409g),gene7079(YALI0_F32021g)
BP	GO:0033617	mitochondrial respiratory chain complex IV assembly	1	9	10	15	0.00826	0.253046	gene6753(YALI0_F24431g)	gene2272(YALI0_C09350g),gene2576(YALI0_C16731g),gene3992(YALI0_D24992g),gene4242(YALI0_E03344g),gene5640(YALI0_E34540g),gene6114(YALI0_F10054g),gene6259(YALI0_F13387g),gene6752(YALI0_F24409g),gene7079(YALI0_F32021g)
BP	GO:0097034	mitochondrial respiratory chain complex IV biogenesis	1	9	10	15	0.00826	0.253046	gene6753(YALI0_F24431g)	gene2272(YALI0_C09350g),gene2576(YALI0_C16731g),gene3992(YALI0_D24992g),gene4242(YALI0_E03344g),gene5640(YALI0_E34540g),gene6114(YALI0_F10054g),gene6259(YALI0_F13387g),gene6752(YALI0_F24409g),gene7079(YALI0_F32021g)
BP	GO:0006865	amino acid transport	19	5	24	47	0.00841	0.253046	gene1240(YALI0_B09537g),gene1551(YALI0_B16522g),gene1680(YALI0_B19338g),gene2390(YALI0_C12100g),gene2598(YALI0_C17237g),gene2937(YALI0_D00495g),gene297(YALI0_A07579g),gene3004(YALI0_D02046g),gene3209(YALI0_D06798g),gene3323(YALI0_D09295g),gene3590(YALI0_D15422g),gene3684(YALI0_D17688g),gene3770(YALI0_D19646g),gene4412(YALI0_E07205g),gene4856(YALI0_E17457g),gene5001(YALI0_E20713g),gene5817(YALI0_F…	gene1709(YALI0_B20064g),gene4501(YALI0_E09284g),gene5986(YALI0_F07106g),gene6552(YALI0_F19866g),gene767(YALI0_A19558g)
CC	GO:0000177	cytoplasmic exosome (RNase complex)	0	8	8	11	0.00857	0.253046	-	gene1197(YALI0_B08514g),gene3151(YALI0_D05511g),gene3208(YALI0_D06776g),gene3404(YALI0_D11000g),gene5304(YALI0_E27390g),gene5574(YALI0_E33121g),gene6337(YALI0_F15147g),gene6569(YALI0_F20240g)
CC	GO:0031166	integral component of vacuolar membrane	6	2	8	11	0.00857	0.253046	gene14(YALI0_A00418g),gene1505(YALI0_B15488g),gene1902(YALI0_C00825g),gene3004(YALI0_D02046g),gene4330(YALI0_E05313g),gene5656(YALI0_E34903g)	gene2396(YALI0_C12232g),gene6441(YALI0_F17446g)
CC	GO:0031310	intrinsic component of vacuolar membrane	6	2	8	11	0.00857	0.253046	gene14(YALI0_A00418g),gene1505(YALI0_B15488g),gene1902(YALI0_C00825g),gene3004(YALI0_D02046g),gene4330(YALI0_E05313g),gene5656(YALI0_E34903g)	gene2396(YALI0_C12232g),gene6441(YALI0_F17446g)
CC	GO:0071627	integral component of fungal-type vacuolar membrane	6	2	8	11	0.00857	0.253046	gene14(YALI0_A00418g),gene1505(YALI0_B15488g),gene1902(YALI0_C00825g),gene3004(YALI0_D02046g),gene4330(YALI0_E05313g),gene5656(YALI0_E34903g)	gene2396(YALI0_C12232g),gene6441(YALI0_F17446g)
CC	GO:0071628	intrinsic component of fungal-type vacuolar membrane	6	2	8	11	0.00857	0.253046	gene14(YALI0_A00418g),gene1505(YALI0_B15488g),gene1902(YALI0_C00825g),gene3004(YALI0_D02046g),gene4330(YALI0_E05313g),gene5656(YALI0_E34903g)	gene2396(YALI0_C12232g),gene6441(YALI0_F17446g)
BP	GO:0006743	ubiquinone metabolic process	0	9	9	13	0.00859	0.253046	-	gene1513(YALI0_B15664g),gene1522(YALI0_B15884g),gene2636(YALI0_C18205g),gene2661(YALI0_C18755g),gene356(YALI0_A09042g),gene4763(YALI0_E15224g),gene5319(YALI0_E27764g),gene6878(YALI0_F27247g),gene6881(YALI0_F27313g)
BP	GO:0006744	ubiquinone biosynthetic process	0	9	9	13	0.00859	0.253046	-	gene1513(YALI0_B15664g),gene1522(YALI0_B15884g),gene2636(YALI0_C18205g),gene2661(YALI0_C18755g),gene356(YALI0_A09042g),gene4763(YALI0_E15224g),gene5319(YALI0_E27764g),gene6878(YALI0_F27247g),gene6881(YALI0_F27313g)
BP	GO:0042181	ketone biosynthetic process	0	9	9	13	0.00859	0.253046	-	gene1513(YALI0_B15664g),gene1522(YALI0_B15884g),gene2636(YALI0_C18205g),gene2661(YALI0_C18755g),gene356(YALI0_A09042g),gene4763(YALI0_E15224g),gene5319(YALI0_E27764g),gene6878(YALI0_F27247g),gene6881(YALI0_F27313g)
BP	GO:1901661	quinone metabolic process	0	9	9	13	0.00859	0.253046	-	gene1513(YALI0_B15664g),gene1522(YALI0_B15884g),gene2636(YALI0_C18205g),gene2661(YALI0_C18755g),gene356(YALI0_A09042g),gene4763(YALI0_E15224g),gene5319(YALI0_E27764g),gene6878(YALI0_F27247g),gene6881(YALI0_F27313g)
BP	GO:1901663	quinone biosynthetic process	0	9	9	13	0.00859	0.253046	-	gene1513(YALI0_B15664g),gene1522(YALI0_B15884g),gene2636(YALI0_C18205g),gene2661(YALI0_C18755g),gene356(YALI0_A09042g),gene4763(YALI0_E15224g),gene5319(YALI0_E27764g),gene6878(YALI0_F27247g),gene6881(YALI0_F27313g)
BP	GO:0019740	nitrogen utilization	5	3	8	11	0.00862	0.253046	gene1706(YALI0_B19998g),gene3035(YALI0_D02783g),gene3950(YALI0_D23925g),gene5294(YALI0_E27203g),gene5318(YALI0_E27742g)	gene1426(YALI0_B13794g),gene1996(YALI0_C03069g),gene754(YALI0_A19228g)
CC	GO:0005840	ribosome	2	65	67	158	0.00877	0.253232	gene3497(YALI0_D13104g),gene6794(YALI0_F25399g)	gene1101(YALI0_B06116g),gene1118(YALI0_B06578g),gene114(YALI0_A02849g),gene1177(YALI0_B08074g),gene121(YALI0_A03003g),gene1220(YALI0_B09075g),gene1284(YALI0_B10494g),gene1306(YALI0_B11000g),gene1482(YALI0_B14993g),gene1607(YALI0_B17732g),gene1826(YALI0_B22594g),gene2207(YALI0_C07887g),gene2242(YALI0_C08723g),gene2334(YALI0_C10802g),gene2451(YALI0_C13706g),gene252(YALI0_A06501g),gene2565(YALI0_C16…
BP	GO:0006766	vitamin metabolic process	9	6	15	26	0.0088	0.253232	gene1215(YALI0_B08965g),gene1661(YALI0_B18898g),gene3195(YALI0_D06501g),gene3274(YALI0_D08250g),gene3589(YALI0_D15400g),gene3886(YALI0_D22484g),gene4809(YALI0_E16346g),gene4996(YALI0_E20603g),gene5029(YALI0_E21351g)	gene1096(YALI0_B06006g),gene2532(YALI0_C15554g),gene3544(YALI0_D14322g),gene384(YALI0_A09768g),gene4281(YALI0_E04224g),gene6599(YALI0_F20900g)
BP	GO:0006767	water-soluble vitamin metabolic process	9	6	15	26	0.0088	0.253232	gene1215(YALI0_B08965g),gene1661(YALI0_B18898g),gene3195(YALI0_D06501g),gene3274(YALI0_D08250g),gene3589(YALI0_D15400g),gene3886(YALI0_D22484g),gene4809(YALI0_E16346g),gene4996(YALI0_E20603g),gene5029(YALI0_E21351g)	gene1096(YALI0_B06006g),gene2532(YALI0_C15554g),gene3544(YALI0_D14322g),gene384(YALI0_A09768g),gene4281(YALI0_E04224g),gene6599(YALI0_F20900g)
MF	GO:0008757	S-adenosylmethionine-dependent methyltransferase activity	1	29	30	60	0.00903	0.258152	gene4337(YALI0_E05467g)	gene1201(YALI0_B08624g),gene1288(YALI0_B10582g),gene1522(YALI0_B15884g),gene1688(YALI0_B19558g),gene2460(YALI0_C13882g),gene2636(YALI0_C18205g),gene3150(YALI0_D05489g),gene3228(YALI0_D07238g),gene3367(YALI0_D10234g),gene3403(YALI0_D10989g),gene3487(YALI0_D12859g),gene3854(YALI0_D21684g),gene4125(YALI0_E00770g),gene4159(YALI0_E01496g),gene4364(YALI0_E06061g),gene4394(YALI0_E06765g),gene5456(YALI0_…
MF	GO:0008483	transaminase activity	13	0	13	21	0.00919	0.259336	gene1772(YALI0_B21428g),gene2057(YALI0_C04433g),gene2088(YALI0_C05258g),gene2109(YALI0_C05709g),gene2972(YALI0_D01265g),gene3186(YALI0_D06325g),gene344(YALI0_A08734g),gene3620(YALI0_D16269g),gene4458(YALI0_E08360g),gene4891(YALI0_E18238g),gene5013(YALI0_E20977g),gene5789(YALI0_F02849g),gene6963(YALI0_F29337g)	-
MF	GO:0016769	transferase activity, transferring nitrogenous groups	13	0	13	21	0.00919	0.259336	gene1772(YALI0_B21428g),gene2057(YALI0_C04433g),gene2088(YALI0_C05258g),gene2109(YALI0_C05709g),gene2972(YALI0_D01265g),gene3186(YALI0_D06325g),gene344(YALI0_A08734g),gene3620(YALI0_D16269g),gene4458(YALI0_E08360g),gene4891(YALI0_E18238g),gene5013(YALI0_E20977g),gene5789(YALI0_F02849g),gene6963(YALI0_F29337g)	-
BP	GO:0043043	peptide biosynthetic process	12	103	115	289	0.0093	0.260758	gene1901(YALI0_C00803g),gene2551(YALI0_C16049g),gene2787(YALI0_C21604g),gene2881(YALI0_C23661g),gene317(YALI0_A08063g),gene3266(YALI0_D08052g),gene3497(YALI0_D13104g),gene5427(YALI0_E30129g),gene6241(YALI0_F13035g),gene6794(YALI0_F25399g),gene792(YALI0_A20152g),gene903(YALI0_B01408g)	gene1092(YALI0_B05918g),gene1101(YALI0_B06116g),gene1118(YALI0_B06578g),gene114(YALI0_A02849g),gene121(YALI0_A03003g),gene1284(YALI0_B10494g),gene1306(YALI0_B11000g),gene1482(YALI0_B14993g),gene1515(YALI0_B15708g),gene1607(YALI0_B17732g),gene1757(YALI0_B21098g),gene1797(YALI0_B21978g),gene1826(YALI0_B22594g),gene2207(YALI0_C07887g),gene2242(YALI0_C08723g),gene2333(YALI0_C10780g),gene2334(YALI0_C1…
MF	GO:0005342	organic acid transmembrane transporter activity	23	11	34	70	0.00984	0.271243	gene1240(YALI0_B09537g),gene1551(YALI0_B16522g),gene1680(YALI0_B19338g),gene1685(YALI0_B19470g),gene2390(YALI0_C12100g),gene2584(YALI0_C16907g),gene2598(YALI0_C17237g),gene2865(YALI0_C23298g),gene3004(YALI0_D02046g),gene3209(YALI0_D06798g),gene3323(YALI0_D09295g),gene3590(YALI0_D15422g),gene3770(YALI0_D19646g),gene4856(YALI0_E17457g),gene5001(YALI0_E20713g),gene5565(YALI0_E32901g),gene5817(YALI0_…	gene1294(YALI0_B10736g),gene1709(YALI0_B20064g),gene2293(YALI0_C09823g),gene2530(YALI0_C15488g),gene2629(YALI0_C18051g),gene2777(YALI0_C21406g),gene3788(YALI0_D20108g),gene4501(YALI0_E09284g),gene5975(YALI0_F06842g),gene5986(YALI0_F07106g),gene6552(YALI0_F19866g)
MF	GO:0046943	carboxylic acid transmembrane transporter activity	23	11	34	70	0.00984	0.271243	gene1240(YALI0_B09537g),gene1551(YALI0_B16522g),gene1680(YALI0_B19338g),gene1685(YALI0_B19470g),gene2390(YALI0_C12100g),gene2584(YALI0_C16907g),gene2598(YALI0_C17237g),gene2865(YALI0_C23298g),gene3004(YALI0_D02046g),gene3209(YALI0_D06798g),gene3323(YALI0_D09295g),gene3590(YALI0_D15422g),gene3770(YALI0_D19646g),gene4856(YALI0_E17457g),gene5001(YALI0_E20713g),gene5565(YALI0_E32901g),gene5817(YALI0_…	gene1294(YALI0_B10736g),gene1709(YALI0_B20064g),gene2293(YALI0_C09823g),gene2530(YALI0_C15488g),gene2629(YALI0_C18051g),gene2777(YALI0_C21406g),gene3788(YALI0_D20108g),gene4501(YALI0_E09284g),gene5975(YALI0_F06842g),gene5986(YALI0_F07106g),gene6552(YALI0_F19866g)
CC	GO:0030687	preribosome, large subunit precursor	0	14	14	24	0.00986	0.271243	-	gene1363(YALI0_B12320g),gene1557(YALI0_B16654g),gene2213(YALI0_C08052g),gene2423(YALI0_C12881g),gene2836(YALI0_C22704g),gene3294(YALI0_D08668g),gene3449(YALI0_D12012g),gene3495(YALI0_D13068g),gene3727(YALI0_D18700g),gene3769(YALI0_D19624g),gene474(YALI0_A12155g),gene5257(YALI0_E26389g),gene5628(YALI0_E34287g),gene6624(YALI0_F21483g)
MF	GO:0019239	deaminase activity	3	4	7	9	0.01012	0.276655	gene1927(YALI0_C01419g),gene4599(YALI0_E11495g),gene5227(YALI0_E25740g)	gene1639(YALI0_B18436g),gene2860(YALI0_C23210g),gene4699(YALI0_E13728g),gene5265(YALI0_E26543g)
CC	GO:0005758	mitochondrial intermembrane space	3	10	13	22	0.0111	0.298666	gene1215(YALI0_B08965g),gene6010(YALI0_F07667g),gene6603(YALI0_F20988g)	gene1274(YALI0_B10274g),gene3214(YALI0_D06908g),gene3322(YALI0_D09273g),gene3430(YALI0_D11572g),gene4242(YALI0_E03344g),gene4321(YALI0_E05115g),gene4372(YALI0_E06237g),gene5171(YALI0_E24409g),gene5421(YALI0_E29975g),gene5640(YALI0_E34540g)
CC	GO:0031970	organelle envelope lumen	3	10	13	22	0.0111	0.298666	gene1215(YALI0_B08965g),gene6010(YALI0_F07667g),gene6603(YALI0_F20988g)	gene1274(YALI0_B10274g),gene3214(YALI0_D06908g),gene3322(YALI0_D09273g),gene3430(YALI0_D11572g),gene4242(YALI0_E03344g),gene4321(YALI0_E05115g),gene4372(YALI0_E06237g),gene5171(YALI0_E24409g),gene5421(YALI0_E29975g),gene5640(YALI0_E34540g)
CC	GO:0031966	mitochondrial membrane	8	67	75	181	0.01113	0.298666	gene2497(YALI0_C14806g),gene2888(YALI0_C23815g),gene4127(YALI0_E00814g),gene5243(YALI0_E26081g),gene5655(YALI0_E34881g),gene6545(YALI0_F19712g),gene6753(YALI0_F24431g),gene6901(YALI0_F27753g)	gene1305(YALI0_B10978g),gene1391(YALI0_B12958g),gene1513(YALI0_B15664g),gene1522(YALI0_B15884g),gene1530(YALI0_B16060g),gene1646(YALI0_B18590g),gene1692(YALI0_B19646g),gene204(YALI0_A05137g),gene2168(YALI0_C06974g),gene2272(YALI0_C09350g),gene2344(YALI0_C11011g),gene2424(YALI0_C12918g),gene2636(YALI0_C18205g),gene2651(YALI0_C18513g),gene2680(YALI0_C19195g),gene278(YALI0_A07084g),gene2795(YALI0_C2…
MF	GO:0008514	organic anion transmembrane transporter activity	24	13	37	78	0.01155	0.306683	gene1240(YALI0_B09537g),gene1551(YALI0_B16522g),gene1680(YALI0_B19338g),gene1685(YALI0_B19470g),gene2390(YALI0_C12100g),gene2584(YALI0_C16907g),gene2598(YALI0_C17237g),gene2865(YALI0_C23298g),gene3004(YALI0_D02046g),gene3209(YALI0_D06798g),gene3323(YALI0_D09295g),gene3590(YALI0_D15422g),gene3770(YALI0_D19646g),gene4856(YALI0_E17457g),gene5001(YALI0_E20713g),gene5565(YALI0_E32901g),gene5817(YALI0_…	gene1294(YALI0_B10736g),gene1709(YALI0_B20064g),gene2293(YALI0_C09823g),gene2530(YALI0_C15488g),gene2629(YALI0_C18051g),gene2777(YALI0_C21406g),gene3788(YALI0_D20108g),gene422(YALI0_A10659g),gene4501(YALI0_E09284g),gene5975(YALI0_F06842g),gene5986(YALI0_F07106g),gene652(YALI0_A16863g),gene6552(YALI0_F19866g)
BP	GO:0003333	amino acid transmembrane transport	15	4	19	36	0.01187	0.306683	gene1240(YALI0_B09537g),gene1551(YALI0_B16522g),gene1680(YALI0_B19338g),gene2390(YALI0_C12100g),gene2598(YALI0_C17237g),gene3004(YALI0_D02046g),gene3209(YALI0_D06798g),gene3323(YALI0_D09295g),gene3590(YALI0_D15422g),gene3770(YALI0_D19646g),gene4856(YALI0_E17457g),gene5001(YALI0_E20713g),gene5817(YALI0_F03498g),gene6812(YALI0_F25795g),gene6992(YALI0_F30063g)	gene1709(YALI0_B20064g),gene4501(YALI0_E09284g),gene5986(YALI0_F07106g),gene6552(YALI0_F19866g)
BP	GO:0016042	lipid catabolic process	24	4	28	58	0.01205	0.306683	gene1175(YALI0_B08030g),gene1280(YALI0_B10406g),gene2046(YALI0_C04180g),gene2890(YALI0_C23859g),gene2922(YALI0_D00176g),gene3272(YALI0_D08206g),gene3984(YALI0_D24750g),gene4095(YALI0_E00110g),gene4385(YALI0_E06567g),gene4581(YALI0_E11099g),gene4797(YALI0_E16060g),gene4905(YALI0_E18568g),gene5313(YALI0_E27654g),gene5498(YALI0_E31603g),gene5562(YALI0_E32835g),gene5665(YALI0_E35222g),gene5950(YALI0_…	gene1198(YALI0_B08536g),gene490(YALI0_A12573g),gene6811(YALI0_F25773g),gene919(YALI0_B01771g)
BP	GO:0002143	tRNA wobble position uridine thiolation	0	4	4	4	0.0122	0.306683	-	gene1273(YALI0_B10263g),gene2631(YALI0_C18095g),gene3680(YALI0_D17600g),gene6780(YALI0_F25069g)
BP	GO:0002943	tRNA dihydrouridine synthesis	0	4	4	4	0.0122	0.306683	-	gene1776(YALI0_B21516g),gene5241(YALI0_E26048g),gene5242(YALI0_E26059g),gene6959(YALI0_F29205g)
BP	GO:0006772	thiamine metabolic process	1	3	4	4	0.0122	0.306683	gene5029(YALI0_E21351g)	gene2532(YALI0_C15554g),gene384(YALI0_A09768g),gene4281(YALI0_E04224g)
BP	GO:0006808	regulation of nitrogen utilization	3	1	4	4	0.0122	0.306683	gene3035(YALI0_D02783g),gene3950(YALI0_D23925g),gene5318(YALI0_E27742g)	gene1996(YALI0_C03069g)
BP	GO:0032447	protein urmylation	1	3	4	4	0.0122	0.306683	gene4947(YALI0_E19481g)	gene1273(YALI0_B10263g),gene2631(YALI0_C18095g),gene3680(YALI0_D17600g)
BP	GO:0042723	thiamine-containing compound metabolic process	1	3	4	4	0.0122	0.306683	gene5029(YALI0_E21351g)	gene2532(YALI0_C15554g),gene384(YALI0_A09768g),gene4281(YALI0_E04224g)
BP	GO:0070129	regulation of mitochondrial translation	0	4	4	4	0.0122	0.306683	-	gene2637(YALI0_C18227g),gene265(YALI0_A06765g),gene3784(YALI0_D20020g),gene5544(YALI0_E32483g)
BP	GO:0070131	positive regulation of mitochondrial translation	0	4	4	4	0.0122	0.306683	-	gene2637(YALI0_C18227g),gene265(YALI0_A06765g),gene3784(YALI0_D20020g),gene5544(YALI0_E32483g)
MF	GO:0043021	ribonucleoprotein complex binding	3	16	19	35	0.01233	0.30818	gene1262(YALI0_B10021g),gene6706(YALI0_F23375g),gene792(YALI0_A20152g)	gene1363(YALI0_B12320g),gene1692(YALI0_B19646g),gene265(YALI0_A06765g),gene2670(YALI0_C18997g),gene3495(YALI0_D13068g),gene428(YALI0_A10813g),gene5091(YALI0_E22759g),gene5257(YALI0_E26389g),gene5287(YALI0_E27049g),gene5629(YALI0_E34309g),gene6031(YALI0_F08151g),gene6143(YALI0_F10725g),gene6371(YALI0_F15873g),gene6617(YALI0_F21329g),gene696(YALI0_A17941g),gene887(YALI0_B01034g)
MF	GO:0046872	metal ion binding	110	104	214	552	0.01327	0.32979	gene1013(YALI0_B04070g),gene1033(YALI0_B04510g),gene1057(YALI0_B05038g),gene1075(YALI0_B05522g),gene1215(YALI0_B08965g),gene1247(YALI0_B09713g),gene1272(YALI0_B10241g),gene1419(YALI0_B13640g),gene1428(YALI0_B13838g),gene1464(YALI0_B14619g),gene1602(YALI0_B17622g),gene1635(YALI0_B18348g),gene1661(YALI0_B18898g),gene1681(YALI0_B19360g),gene1689(YALI0_B19580g),gene1706(YALI0_B19998g),gene1792(YALI0_…	gene1048(YALI0_B04851g),gene1059(YALI0_B05126g),gene1377(YALI0_B12628g),gene1427(YALI0_B13816g),gene1561(YALI0_B16742g),gene1646(YALI0_B18590g),gene1660(YALI0_B18876g),gene1682(YALI0_B19382g),gene1710(YALI0_B20086g),gene1757(YALI0_B21098g),gene1876(YALI0_C00253g),gene2054(YALI0_C04367g),gene2085(YALI0_C05170g),gene2125(YALI0_C06061g),gene2360(YALI0_C11407g),gene2377(YALI0_C11803g),gene2418(YALI0_…
BP	GO:0044743	protein transmembrane import into intracellular organelle	3	20	23	46	0.01337	0.330398	gene1691(YALI0_B19624g),gene6204(YALI0_F12111g),gene6715(YALI0_F23595g)	gene1391(YALI0_B12958g),gene2168(YALI0_C06974g),gene2651(YALI0_C18513g),gene278(YALI0_A07084g),gene2795(YALI0_C21780g),gene2944(YALI0_D00649g),gene2947(YALI0_D00715g),gene3108(YALI0_D04554g),gene3214(YALI0_D06908g),gene3831(YALI0_D21142g),gene4321(YALI0_E05115g),gene4372(YALI0_E06237g),gene4759(YALI0_E15136g),gene5457(YALI0_E30745g),gene5798(YALI0_F03047g),gene5838(YALI0_F03949g),gene6909(YALI0_F…
CC	GO:0044391	ribosomal subunit	2	55	57	134	0.01391	0.341811	gene3497(YALI0_D13104g),gene6794(YALI0_F25399g)	gene1101(YALI0_B06116g),gene114(YALI0_A02849g),gene1177(YALI0_B08074g),gene121(YALI0_A03003g),gene1220(YALI0_B09075g),gene1284(YALI0_B10494g),gene1306(YALI0_B11000g),gene1482(YALI0_B14993g),gene1607(YALI0_B17732g),gene1826(YALI0_B22594g),gene2207(YALI0_C07887g),gene2242(YALI0_C08723g),gene2334(YALI0_C10802g),gene2451(YALI0_C13706g),gene2565(YALI0_C16478g),gene2633(YALI0_C18139g),gene2766(YALI0_C2…
MF	GO:0003988	acetyl-CoA C-acyltransferase activity	3	1	4	4	0.01409	0.342387	gene2922(YALI0_D00176g),gene4581(YALI0_E11099g),gene4905(YALI0_E18568g)	gene1198(YALI0_B08536g)
MF	GO:0017150	tRNA dihydrouridine synthase activity	0	4	4	4	0.01409	0.342387	-	gene1776(YALI0_B21516g),gene5241(YALI0_E26048g),gene5242(YALI0_E26059g),gene6959(YALI0_F29205g)
BP	GO:0006412	translation	6	103	109	276	0.01438	0.347503	gene2551(YALI0_C16049g),gene317(YALI0_A08063g),gene3497(YALI0_D13104g),gene6241(YALI0_F13035g),gene6794(YALI0_F25399g),gene792(YALI0_A20152g)	gene1092(YALI0_B05918g),gene1101(YALI0_B06116g),gene1118(YALI0_B06578g),gene114(YALI0_A02849g),gene121(YALI0_A03003g),gene1284(YALI0_B10494g),gene1306(YALI0_B11000g),gene1482(YALI0_B14993g),gene1515(YALI0_B15708g),gene1607(YALI0_B17732g),gene1757(YALI0_B21098g),gene1797(YALI0_B21978g),gene1826(YALI0_B22594g),gene2207(YALI0_C07887g),gene2242(YALI0_C08723g),gene2333(YALI0_C10780g),gene2334(YALI0_C1…
BP	GO:0006518	peptide metabolic process	15	105	120	307	0.01504	0.358716	gene1901(YALI0_C00803g),gene2551(YALI0_C16049g),gene2787(YALI0_C21604g),gene2881(YALI0_C23661g),gene317(YALI0_A08063g),gene3266(YALI0_D08052g),gene3497(YALI0_D13104g),gene3921(YALI0_D23309g),gene5427(YALI0_E30129g),gene6010(YALI0_F07667g),gene6241(YALI0_F13035g),gene6603(YALI0_F20988g),gene6794(YALI0_F25399g),gene792(YALI0_A20152g),gene903(YALI0_B01408g)	gene1092(YALI0_B05918g),gene1101(YALI0_B06116g),gene1118(YALI0_B06578g),gene114(YALI0_A02849g),gene121(YALI0_A03003g),gene1284(YALI0_B10494g),gene1305(YALI0_B10978g),gene1306(YALI0_B11000g),gene1482(YALI0_B14993g),gene1515(YALI0_B15708g),gene1607(YALI0_B17732g),gene1757(YALI0_B21098g),gene1797(YALI0_B21978g),gene1826(YALI0_B22594g),gene2207(YALI0_C07887g),gene2242(YALI0_C08723g),gene2333(YALI0_C1…
MF	GO:0043167	ion binding	226	224	450	1216	0.01506	0.358716	gene1013(YALI0_B04070g),gene1033(YALI0_B04510g),gene1057(YALI0_B05038g),gene1075(YALI0_B05522g),gene1112(YALI0_B06413g),gene1138(YALI0_B07029g),gene1199(YALI0_B08558g),gene1215(YALI0_B08965g),gene1243(YALI0_B09603g),gene1244(YALI0_B09625g),gene1247(YALI0_B09713g),gene1272(YALI0_B10241g),gene1358(YALI0_B12188g),gene1392(YALI0_B12980g),gene1419(YALI0_B13640g),gene1428(YALI0_B13838g),gene1464(YALI0_…	gene1048(YALI0_B04851g),gene1059(YALI0_B05126g),gene1092(YALI0_B05918g),gene1270(YALI0_B10197g),gene1309(YALI0_B11066g),gene1349(YALI0_B11968g),gene1377(YALI0_B12628g),gene1420(YALI0_B13662g),gene1427(YALI0_B13816g),gene1436(YALI0_B14014g),gene1470(YALI0_B14751g),gene1561(YALI0_B16742g),gene1568(YALI0_B16896g),gene1646(YALI0_B18590g),gene1647(YALI0_B18612g),gene1660(YALI0_B18876g),gene1682(YALI0_…
MF	GO:0043169	cation binding	111	105	216	559	0.01509	0.358716	gene1013(YALI0_B04070g),gene1033(YALI0_B04510g),gene1057(YALI0_B05038g),gene1075(YALI0_B05522g),gene1215(YALI0_B08965g),gene1247(YALI0_B09713g),gene1272(YALI0_B10241g),gene1419(YALI0_B13640g),gene1428(YALI0_B13838g),gene1464(YALI0_B14619g),gene1602(YALI0_B17622g),gene1635(YALI0_B18348g),gene1661(YALI0_B18898g),gene1681(YALI0_B19360g),gene1689(YALI0_B19580g),gene1706(YALI0_B19998g),gene1792(YALI0_…	gene1048(YALI0_B04851g),gene1059(YALI0_B05126g),gene1377(YALI0_B12628g),gene1427(YALI0_B13816g),gene1561(YALI0_B16742g),gene1646(YALI0_B18590g),gene1660(YALI0_B18876g),gene1682(YALI0_B19382g),gene1710(YALI0_B20086g),gene1757(YALI0_B21098g),gene1876(YALI0_C00253g),gene2054(YALI0_C04367g),gene2085(YALI0_C05170g),gene2125(YALI0_C06061g),gene2360(YALI0_C11407g),gene2377(YALI0_C11803g),gene2418(YALI0_…
BP	GO:0090304	nucleic acid metabolic process	97	280	377	1046	0.01527	0.361032	gene1023(YALI0_B04290g),gene1033(YALI0_B04510g),gene1057(YALI0_B05038g),gene1073(YALI0_B05478g),gene11(YALI0_A00369g),gene1237(YALI0_B09449g),gene1247(YALI0_B09713g),gene1258(YALI0_B09977g),gene1375(YALI0_B12584g),gene1401(YALI0_B13200g),gene1408(YALI0_B13376g),gene1419(YALI0_B13640g),gene1540(YALI0_B16280g),gene1752(YALI0_B20988g),gene1775(YALI0_B21494g),gene1807(YALI0_B22176g),gene1865(YALI0_B2…	gene1002(YALI0_B03784g),gene1016(YALI0_B04136g),gene1043(YALI0_B04752g),gene1044(YALI0_B04774g),gene1048(YALI0_B04851g),gene1079(YALI0_B05632g),gene1092(YALI0_B05918g),gene1197(YALI0_B08514g),gene1223(YALI0_B09119g),gene1264(YALI0_B10065g),gene1270(YALI0_B10197g),gene1271(YALI0_B10219g),gene1273(YALI0_B10263g),gene1288(YALI0_B10582g),gene1349(YALI0_B11968g),gene1361(YALI0_B12276g),gene1363(YALI0_…
BP	GO:0009395	phospholipid catabolic process	7	3	10	16	0.01552	0.36497	gene3272(YALI0_D08206g),gene4095(YALI0_E00110g),gene4797(YALI0_E16060g),gene5498(YALI0_E31603g),gene5665(YALI0_E35222g),gene6036(YALI0_F08217g),gene643(YALI0_A16610g)	gene490(YALI0_A12573g),gene6811(YALI0_F25773g),gene919(YALI0_B01771g)
BP	GO:0006839	mitochondrial transport	0	24	24	49	0.01575	0.366375	-	gene1305(YALI0_B10978g),gene1391(YALI0_B12958g),gene2168(YALI0_C06974g),gene2651(YALI0_C18513g),gene278(YALI0_A07084g),gene2795(YALI0_C21780g),gene2947(YALI0_D00715g),gene3108(YALI0_D04554g),gene3214(YALI0_D06908g),gene3831(YALI0_D21142g),gene394(YALI0_A09988g),gene4321(YALI0_E05115g),gene4372(YALI0_E06237g),gene4501(YALI0_E09284g),gene4731(YALI0_E14487g),gene4759(YALI0_E15136g),gene5457(YALI0_E3…
BP	GO:0009062	fatty acid catabolic process	13	1	14	25	0.01578	0.366375	gene1280(YALI0_B10406g),gene2890(YALI0_C23859g),gene2922(YALI0_D00176g),gene3984(YALI0_D24750g),gene4385(YALI0_E06567g),gene4581(YALI0_E11099g),gene4905(YALI0_E18568g),gene5313(YALI0_E27654g),gene5562(YALI0_E32835g),gene6147(YALI0_F10857g),gene6653(YALI0_F22121g),gene6937(YALI0_F28567g),gene794(YALI0_A20207g)	gene1198(YALI0_B08536g)
BP	GO:0000469	cleavage involved in rRNA processing	0	9	9	14	0.01702	0.366375	-	gene1002(YALI0_B03784g),gene1016(YALI0_B04136g),gene1197(YALI0_B08514g),gene3151(YALI0_D05511g),gene3404(YALI0_D11000g),gene4291(YALI0_E04444g),gene4805(YALI0_E16258g),gene5574(YALI0_E33121g),gene6369(YALI0_F15829g)
BP	GO:0090151	establishment of protein localization to mitochondrial membrane	0	9	9	14	0.01702	0.366375	-	gene2168(YALI0_C06974g),gene2795(YALI0_C21780g),gene3108(YALI0_D04554g),gene3214(YALI0_D06908g),gene4321(YALI0_E05115g),gene4372(YALI0_E06237g),gene5457(YALI0_E30745g),gene6909(YALI0_F27929g),gene6985(YALI0_F29931g)
MF	GO:0005215	transporter activity	95	59	154	390	0.01711	0.366375	gene0(YALI0_A00110g),gene1019(YALI0_B04202g),gene1111(YALI0_B06391g),gene1204(YALI0_B08712g),gene1240(YALI0_B09537g),gene1358(YALI0_B12188g),gene1392(YALI0_B12980g),gene1551(YALI0_B16522g),gene157(YALI0_A03949g),gene1613(YALI0_B17864g),gene1616(YALI0_B17930g),gene1680(YALI0_B19338g),gene1685(YALI0_B19470g),gene1894(YALI0_C00627g),gene2071(YALI0_C04796g),gene2141(YALI0_C06424g),gene2149(YALI0_C065…	gene1294(YALI0_B10736g),gene1426(YALI0_B13794g),gene1530(YALI0_B16060g),gene1709(YALI0_B20064g),gene1781(YALI0_B21604g),gene2185(YALI0_C07348g),gene2293(YALI0_C09823g),gene2397(YALI0_C12254g),gene2483(YALI0_C14498g),gene2530(YALI0_C15488g),gene2629(YALI0_C18051g),gene2655(YALI0_C18623g),gene2680(YALI0_C19195g),gene2731(YALI0_C20295g),gene2777(YALI0_C21406g),gene278(YALI0_A07084g),gene2831(YALI0_C…
CC	GO:0000172	ribonuclease MRP complex	0	5	5	6	0.01752	0.366375	-	gene1043(YALI0_B04752g),gene2029(YALI0_C03784g),gene4305(YALI0_E04741g),gene5377(YALI0_E29007g),gene6243(YALI0_F13068g)
BP	GO:0000459	exonucleolytic trimming involved in rRNA processing	0	5	5	6	0.01759	0.366375	-	gene1197(YALI0_B08514g),gene3151(YALI0_D05511g),gene3404(YALI0_D11000g),gene4291(YALI0_E04444g),gene5574(YALI0_E33121g)
BP	GO:0000467	exonucleolytic trimming to generate mature 3'-end of 5.8S rRNA from tricistronic rRNA transcript (SSU-rRNA, 5.8S rRNA, LSU-rRNA)	0	5	5	6	0.01759	0.366375	-	gene1197(YALI0_B08514g),gene3151(YALI0_D05511g),gene3404(YALI0_D11000g),gene4291(YALI0_E04444g),gene5574(YALI0_E33121g)
BP	GO:0002182	cytoplasmic translational elongation	0	5	5	6	0.01759	0.366375	-	gene4384(YALI0_E06545g),gene6310(YALI0_F14553g),gene6650(YALI0_F22055g),gene6776(YALI0_F24981g),gene785(YALI0_A19954g)
BP	GO:0015727	lactate transport	2	3	5	6	0.01759	0.366375	gene1685(YALI0_B19470g),gene5565(YALI0_E32901g)	gene2530(YALI0_C15488g),gene2777(YALI0_C21406g),gene3788(YALI0_D20108g)
BP	GO:0016078	tRNA catabolic process	0	5	5	6	0.01759	0.366375	-	gene1197(YALI0_B08514g),gene3151(YALI0_D05511g),gene3404(YALI0_D11000g),gene4291(YALI0_E04444g),gene5574(YALI0_E33121g)
BP	GO:0017182	peptidyl-diphthamide metabolic process	0	5	5	6	0.01759	0.366375	-	gene4384(YALI0_E06545g),gene6310(YALI0_F14553g),gene6650(YALI0_F22055g),gene6776(YALI0_F24981g),gene785(YALI0_A19954g)
BP	GO:0017183	peptidyl-diphthamide biosynthetic process from peptidyl-histidine	0	5	5	6	0.01759	0.366375	-	gene4384(YALI0_E06545g),gene6310(YALI0_F14553g),gene6650(YALI0_F22055g),gene6776(YALI0_F24981g),gene785(YALI0_A19954g)
BP	GO:0035873	lactate transmembrane transport	2	3	5	6	0.01759	0.366375	gene1685(YALI0_B19470g),gene5565(YALI0_E32901g)	gene2530(YALI0_C15488g),gene2777(YALI0_C21406g),gene3788(YALI0_D20108g)
BP	GO:0035879	plasma membrane lactate transport	2	3	5	6	0.01759	0.366375	gene1685(YALI0_B19470g),gene5565(YALI0_E32901g)	gene2530(YALI0_C15488g),gene2777(YALI0_C21406g),gene3788(YALI0_D20108g)
BP	GO:0043461	proton-transporting ATP synthase complex assembly	0	5	5	6	0.01759	0.366375	-	gene1588(YALI0_B17314g),gene2692(YALI0_C19448g),gene4167(YALI0_E01672g),gene4324(YALI0_E05181g),gene6145(YALI0_F10769g)
BP	GO:0043634	polyadenylation-dependent ncRNA catabolic process	0	5	5	6	0.01759	0.366375	-	gene1197(YALI0_B08514g),gene3151(YALI0_D05511g),gene3404(YALI0_D11000g),gene4291(YALI0_E04444g),gene5574(YALI0_E33121g)
BP	GO:0070272	proton-transporting ATP synthase complex biogenesis	0	5	5	6	0.01759	0.366375	-	gene1588(YALI0_B17314g),gene2692(YALI0_C19448g),gene4167(YALI0_E01672g),gene4324(YALI0_E05181g),gene6145(YALI0_F10769g)
BP	GO:0071029	nuclear ncRNA surveillance	0	5	5	6	0.01759	0.366375	-	gene1197(YALI0_B08514g),gene3151(YALI0_D05511g),gene3404(YALI0_D11000g),gene4291(YALI0_E04444g),gene5574(YALI0_E33121g)
BP	GO:0071035	nuclear polyadenylation-dependent rRNA catabolic process	0	5	5	6	0.01759	0.366375	-	gene1197(YALI0_B08514g),gene3151(YALI0_D05511g),gene3404(YALI0_D11000g),gene4291(YALI0_E04444g),gene5574(YALI0_E33121g)
BP	GO:0071038	nuclear polyadenylation-dependent tRNA catabolic process	0	5	5	6	0.01759	0.366375	-	gene1197(YALI0_B08514g),gene3151(YALI0_D05511g),gene3404(YALI0_D11000g),gene4291(YALI0_E04444g),gene5574(YALI0_E33121g)
BP	GO:0071046	nuclear polyadenylation-dependent ncRNA catabolic process	0	5	5	6	0.01759	0.366375	-	gene1197(YALI0_B08514g),gene3151(YALI0_D05511g),gene3404(YALI0_D11000g),gene4291(YALI0_E04444g),gene5574(YALI0_E33121g)
BP	GO:0071051	polyadenylation-dependent snoRNA 3'-end processing	0	5	5	6	0.01759	0.366375	-	gene3151(YALI0_D05511g),gene3208(YALI0_D06776g),gene4291(YALI0_E04444g),gene5574(YALI0_E33121g),gene6569(YALI0_F20240g)
BP	GO:1900247	regulation of cytoplasmic translational elongation	0	5	5	6	0.01759	0.366375	-	gene4384(YALI0_E06545g),gene6310(YALI0_F14553g),gene6650(YALI0_F22055g),gene6776(YALI0_F24981g),gene785(YALI0_A19954g)
BP	GO:0006820	anion transport	41	17	58	138	0.01771	0.367126	gene1240(YALI0_B09537g),gene1551(YALI0_B16522g),gene1616(YALI0_B17930g),gene1680(YALI0_B19338g),gene1685(YALI0_B19470g),gene1887(YALI0_C00495g),gene2195(YALI0_C07590g),gene2390(YALI0_C12100g),gene2584(YALI0_C16907g),gene2598(YALI0_C17237g),gene2718(YALI0_C20053g),gene2865(YALI0_C23298g),gene2937(YALI0_D00495g),gene297(YALI0_A07579g),gene3004(YALI0_D02046g),gene3209(YALI0_D06798g),gene3323(YALI0_D…	gene1294(YALI0_B10736g),gene1709(YALI0_B20064g),gene2293(YALI0_C09823g),gene2530(YALI0_C15488g),gene2629(YALI0_C18051g),gene2777(YALI0_C21406g),gene3304(YALI0_D08866g),gene3788(YALI0_D20108g),gene422(YALI0_A10659g),gene4487(YALI0_E09015g),gene4501(YALI0_E09284g),gene5975(YALI0_F06842g),gene5986(YALI0_F07106g),gene652(YALI0_A16863g),gene6552(YALI0_F19866g),gene6690(YALI0_F23023g),gene767(YALI0_A19…
BP	GO:0090502	RNA phosphodiester bond hydrolysis, endonucleolytic	4	21	25	52	0.01824	0.368379	gene1775(YALI0_B21494g),gene494(YALI0_A12705g),gene6814(YALI0_F25839g),gene6846(YALI0_F26543g)	gene1016(YALI0_B04136g),gene1043(YALI0_B04752g),gene2029(YALI0_C03784g),gene218(YALI0_A05555g),gene253(YALI0_A06523g),gene3131(YALI0_D05071g),gene3706(YALI0_D18150g),gene4390(YALI0_E06677g),gene4805(YALI0_E16258g),gene493(YALI0_A12683g),gene509(YALI0_A13057g),gene5267(YALI0_E26587g),gene5357(YALI0_E28600g),gene5377(YALI0_E29007g),gene579(YALI0_A15059g),gene5797(YALI0_F03025g),gene5969(YALI0_F0673…
CC	GO:0000176	nuclear exosome (RNase complex)	0	8	8	12	0.01826	0.368379	-	gene1197(YALI0_B08514g),gene233(YALI0_A05995g),gene3151(YALI0_D05511g),gene3208(YALI0_D06776g),gene3404(YALI0_D11000g),gene4291(YALI0_E04444g),gene5574(YALI0_E33121g),gene6569(YALI0_F20240g)
CC	GO:0005736	DNA-directed RNA polymerase I complex	0	8	8	12	0.01826	0.368379	-	gene1048(YALI0_B04851g),gene3193(YALI0_D06457g),gene321(YALI0_A08151g),gene4326(YALI0_E05225g),gene4524(YALI0_E09845g),gene5149(YALI0_E23947g),gene5941(YALI0_F06182g),gene6277(YALI0_F13783g)
CC	GO:1902555	endoribonuclease complex	0	8	8	12	0.01826	0.368379	-	gene1043(YALI0_B04752g),gene2029(YALI0_C03784g),gene3727(YALI0_D18700g),gene5267(YALI0_E26587g),gene5357(YALI0_E28600g),gene5377(YALI0_E29007g),gene6243(YALI0_F13068g),gene714(YALI0_A18293g)
CC	GO:1905348	endonuclease complex	0	8	8	12	0.01826	0.368379	-	gene1043(YALI0_B04752g),gene2029(YALI0_C03784g),gene3727(YALI0_D18700g),gene5267(YALI0_E26587g),gene5357(YALI0_E28600g),gene5377(YALI0_E29007g),gene6243(YALI0_F13068g),gene714(YALI0_A18293g)
BP	GO:0016075	rRNA catabolic process	0	8	8	12	0.01836	0.368379	-	gene1197(YALI0_B08514g),gene3151(YALI0_D05511g),gene3208(YALI0_D06776g),gene3404(YALI0_D11000g),gene4291(YALI0_E04444g),gene5304(YALI0_E27390g),gene5574(YALI0_E33121g),gene6569(YALI0_F20240g)
BP	GO:0034661	ncRNA catabolic process	0	8	8	12	0.01836	0.368379	-	gene1197(YALI0_B08514g),gene3151(YALI0_D05511g),gene3208(YALI0_D06776g),gene3404(YALI0_D11000g),gene4291(YALI0_E04444g),gene5304(YALI0_E27390g),gene5574(YALI0_E33121g),gene6569(YALI0_F20240g)
BP	GO:0006474	N-terminal protein amino acid acetylation	2	4	6	8	0.01934	0.384514	gene869(YALI0_B00638g),gene916(YALI0_B01716g)	gene1084(YALI0_B05742g),gene2366(YALI0_C11539g),gene6051(YALI0_F08591g),gene6209(YALI0_F12221g)
BP	GO:0034475	U4 snRNA 3'-end processing	0	6	6	8	0.01934	0.384514	-	gene1197(YALI0_B08514g),gene3151(YALI0_D05511g),gene3208(YALI0_D06776g),gene3404(YALI0_D11000g),gene5574(YALI0_E33121g),gene6569(YALI0_F20240g)
BP	GO:0033108	mitochondrial respiratory chain complex assembly	1	17	18	35	0.01953	0.384991	gene6753(YALI0_F24431g)	gene1305(YALI0_B10978g),gene1646(YALI0_B18590g),gene2272(YALI0_C09350g),gene2576(YALI0_C16731g),gene2637(YALI0_C18227g),gene3063(YALI0_D03509g),gene3487(YALI0_D12859g),gene3992(YALI0_D24992g),gene4242(YALI0_E03344g),gene4577(YALI0_E11011g),gene4782(YALI0_E15686g),gene555(YALI0_A14388g),gene5640(YALI0_E34540g),gene6114(YALI0_F10054g),gene6259(YALI0_F13387g),gene6752(YALI0_F24409g),gene7079(YALI0_F…
MF	GO:0019843	rRNA binding	0	15	15	27	0.01954	0.384991	-	gene1284(YALI0_B10494g),gene154(YALI0_A03905g),gene206(YALI0_A05181g),gene2633(YALI0_C18139g),gene3284(YALI0_D08470g),gene3869(YALI0_D22088g),gene4100(YALI0_E00220g),gene4159(YALI0_E01496g),gene4305(YALI0_E04741g),gene4715(YALI0_E14124g),gene5439(YALI0_E30371g),gene6113(YALI0_F10032g),gene6438(YALI0_F17380g),gene6444(YALI0_F17512g),gene6851(YALI0_F26653g)
BP	GO:0044283	small molecule biosynthetic process	34	48	82	204	0.0198	0.388364	gene1215(YALI0_B08965g),gene1319(YALI0_B11286g),gene1582(YALI0_B17204g),gene1661(YALI0_B18898g),gene1681(YALI0_B19360g),gene1706(YALI0_B19998g),gene1824(YALI0_B22550g),gene2046(YALI0_C04180g),gene2057(YALI0_C04433g),gene2088(YALI0_C05258g),gene2588(YALI0_C16995g),gene2942(YALI0_D00605g),gene2972(YALI0_D01265g),gene3195(YALI0_D06501g),gene3274(YALI0_D08250g),gene3493(YALI0_D13024g),gene3589(YALI0_…	gene1059(YALI0_B05126g),gene1096(YALI0_B06006g),gene1198(YALI0_B08536g),gene1485(YALI0_B15059g),gene1513(YALI0_B15664g),gene1522(YALI0_B15884g),gene1682(YALI0_B19382g),gene1707(YALI0_B20020g),gene1859(YALI0_B23298g),gene1876(YALI0_C00253g),gene1883(YALI0_C00407g),gene2085(YALI0_C05170g),gene2360(YALI0_C11407g),gene2532(YALI0_C15554g),gene2636(YALI0_C18205g),gene2644(YALI0_C18403g),gene2661(YALI0_…
MF	GO:0015355	secondary active monocarboxylate transmembrane transporter activity	2	3	5	6	0.02075	0.405181	gene1685(YALI0_B19470g),gene5565(YALI0_E32901g)	gene2530(YALI0_C15488g),gene2777(YALI0_C21406g),gene3788(YALI0_D20108g)
BP	GO:0044085	cellular component biogenesis	34	176	210	566	0.02126	0.413294	gene1036(YALI0_B04598g),gene1037(YALI0_B04620g),gene1140(YALI0_B07073g),gene1243(YALI0_B09603g),gene1262(YALI0_B10021g),gene1540(YALI0_B16280g),gene1602(YALI0_B17622g),gene1635(YALI0_B18348g),gene1752(YALI0_B20988g),gene1772(YALI0_B21428g),gene1794(YALI0_B21868g),gene1967(YALI0_C02409g),gene2014(YALI0_C03465g),gene2070(YALI0_C04774g),gene2723(YALI0_C20119g),gene2902(YALI0_C24123g),gene2962(YALI0_…	gene1002(YALI0_B03784g),gene1016(YALI0_B04136g),gene1043(YALI0_B04752g),gene1197(YALI0_B08514g),gene1223(YALI0_B09119g),gene1264(YALI0_B10065g),gene1271(YALI0_B10219g),gene1305(YALI0_B10978g),gene1344(YALI0_B11880g),gene1361(YALI0_B12276g),gene1363(YALI0_B12320g),gene1411(YALI0_B13442g),gene1420(YALI0_B13662g),gene1422(YALI0_B13706g),gene1470(YALI0_B14751g),gene1483(YALI0_B15015g),gene1536(YALI0_…
BP	GO:0034641	cellular nitrogen compound metabolic process	152	391	543	1542	0.02182	0.422304	gene1023(YALI0_B04290g),gene1033(YALI0_B04510g),gene1057(YALI0_B05038g),gene1073(YALI0_B05478g),gene11(YALI0_A00369g),gene1153(YALI0_B07359g),gene1215(YALI0_B08965g),gene1237(YALI0_B09449g),gene1247(YALI0_B09713g),gene1258(YALI0_B09977g),gene1353(YALI0_B12078g),gene1375(YALI0_B12584g),gene1401(YALI0_B13200g),gene1408(YALI0_B13376g),gene1419(YALI0_B13640g),gene1540(YALI0_B16280g),gene1635(YALI0_B1…	gene1002(YALI0_B03784g),gene1016(YALI0_B04136g),gene1043(YALI0_B04752g),gene1044(YALI0_B04774g),gene1048(YALI0_B04851g),gene1079(YALI0_B05632g),gene1092(YALI0_B05918g),gene1096(YALI0_B06006g),gene1101(YALI0_B06116g),gene1118(YALI0_B06578g),gene114(YALI0_A02849g),gene1197(YALI0_B08514g),gene121(YALI0_A03003g),gene1223(YALI0_B09119g),gene1264(YALI0_B10065g),gene1270(YALI0_B10197g),gene1271(YALI0_B1…
MF	GO:0016810	hydrolase activity, acting on carbon-nitrogen (but not peptide) bonds	16	11	27	56	0.02258	0.435088	gene105(YALI0_A02607g),gene1153(YALI0_B07359g),gene2697(YALI0_C19580g),gene3274(YALI0_D08250g),gene3712(YALI0_D18337g),gene4138(YALI0_E01056g),gene4425(YALI0_E07535g),gene4599(YALI0_E11495g),gene4977(YALI0_E20163g),gene4996(YALI0_E20603g),gene5227(YALI0_E25740g),gene5968(YALI0_F06710g),gene6674(YALI0_F22605g),gene6806(YALI0_F25663g),gene7028(YALI0_F30833g),gene822(YALI0_A20834g)	gene1639(YALI0_B18436g),gene2125(YALI0_C06061g),gene2860(YALI0_C23210g),gene2895(YALI0_C23969g),gene3009(YALI0_D02145g),gene3815(YALI0_D20724g),gene4262(YALI0_E03806g),gene4509(YALI0_E09493g),gene4699(YALI0_E13728g),gene5055(YALI0_E21934g),gene5265(YALI0_E26543g)
MF	GO:0001054	RNA polymerase I activity	0	8	8	12	0.02304	0.442004	-	gene1048(YALI0_B04851g),gene3193(YALI0_D06457g),gene321(YALI0_A08151g),gene4326(YALI0_E05225g),gene4524(YALI0_E09845g),gene5149(YALI0_E23947g),gene5941(YALI0_F06182g),gene6277(YALI0_F13783g)
MF	GO:0004596	peptide alpha-N-acetyltransferase activity	2	4	6	8	0.02331	0.44327	gene869(YALI0_B00638g),gene916(YALI0_B01716g)	gene1084(YALI0_B05742g),gene2366(YALI0_C11539g),gene6051(YALI0_F08591g),gene6209(YALI0_F12221g)
MF	GO:0016641	oxidoreductase activity, acting on the CH-NH2 group of donors, oxygen as acceptor	5	1	6	8	0.02331	0.44327	gene2641(YALI0_C18315g),gene2841(YALI0_C22792g),gene6121(YALI0_F10197g),gene636(YALI0_A16445g),gene7017(YALI0_F30591g)	gene3544(YALI0_D14322g)
MF	GO:0003824	catalytic activity	411	402	813	2269	0.02341	0.44327	gene1023(YALI0_B04290g),gene105(YALI0_A02607g),gene1051(YALI0_B04906g),gene1064(YALI0_B05258g),gene1072(YALI0_B05456g),gene1075(YALI0_B05522g),gene108(YALI0_A02673g),gene1080(YALI0_B05654g),gene1112(YALI0_B06413g),gene1138(YALI0_B07029g),gene1142(YALI0_B07117g),gene1153(YALI0_B07359g),gene1170(YALI0_B07755g),gene1175(YALI0_B08030g),gene1176(YALI0_B08052g),gene1180(YALI0_B08140g),gene1199(YALI0_B0…	gene1006(YALI0_B03916g),gene1043(YALI0_B04752g),gene1044(YALI0_B04774g),gene1048(YALI0_B04851g),gene1059(YALI0_B05126g),gene1084(YALI0_B05742g),gene1092(YALI0_B05918g),gene1096(YALI0_B06006g),gene1198(YALI0_B08536g),gene1201(YALI0_B08624g),gene1236(YALI0_B09427g),gene1270(YALI0_B10197g),gene1273(YALI0_B10263g),gene1288(YALI0_B10582g),gene1289(YALI0_B10604g),gene1305(YALI0_B10978g),gene1349(YALI0_…
MF	GO:0022891	substrate-specific transmembrane transporter activity	68	42	110	274	0.02482	0.467943	gene0(YALI0_A00110g),gene1019(YALI0_B04202g),gene1111(YALI0_B06391g),gene1204(YALI0_B08712g),gene1240(YALI0_B09537g),gene1551(YALI0_B16522g),gene157(YALI0_A03949g),gene1613(YALI0_B17864g),gene1616(YALI0_B17930g),gene1680(YALI0_B19338g),gene1685(YALI0_B19470g),gene2141(YALI0_C06424g),gene2149(YALI0_C06578g),gene2195(YALI0_C07590g),gene2314(YALI0_C10311g),gene2390(YALI0_C12100g),gene2541(YALI0_C158…	gene1294(YALI0_B10736g),gene1426(YALI0_B13794g),gene1530(YALI0_B16060g),gene1709(YALI0_B20064g),gene1781(YALI0_B21604g),gene2293(YALI0_C09823g),gene2397(YALI0_C12254g),gene2483(YALI0_C14498g),gene2530(YALI0_C15488g),gene2629(YALI0_C18051g),gene2731(YALI0_C20295g),gene2777(YALI0_C21406g),gene278(YALI0_A07084g),gene2949(YALI0_D00759g),gene3207(YALI0_D06754g),gene3788(YALI0_D20108g),gene422(YALI0_A1…
BP	GO:0015711	organic anion transport	34	15	49	116	0.02519	0.47288	gene1240(YALI0_B09537g),gene1551(YALI0_B16522g),gene1680(YALI0_B19338g),gene1685(YALI0_B19470g),gene1887(YALI0_C00495g),gene2390(YALI0_C12100g),gene2584(YALI0_C16907g),gene2598(YALI0_C17237g),gene2865(YALI0_C23298g),gene2937(YALI0_D00495g),gene297(YALI0_A07579g),gene3004(YALI0_D02046g),gene3209(YALI0_D06798g),gene3323(YALI0_D09295g),gene3590(YALI0_D15422g),gene3684(YALI0_D17688g),gene3770(YALI0_D…	gene1294(YALI0_B10736g),gene1709(YALI0_B20064g),gene2293(YALI0_C09823g),gene2530(YALI0_C15488g),gene2629(YALI0_C18051g),gene2777(YALI0_C21406g),gene3304(YALI0_D08866g),gene3788(YALI0_D20108g),gene422(YALI0_A10659g),gene4501(YALI0_E09284g),gene5975(YALI0_F06842g),gene5986(YALI0_F07106g),gene652(YALI0_A16863g),gene6552(YALI0_F19866g),gene767(YALI0_A19558g)
CC	GO:0019866	organelle inner membrane	7	53	60	146	0.02607	0.487308	gene2497(YALI0_C14806g),gene2888(YALI0_C23815g),gene3569(YALI0_D14916g),gene4127(YALI0_E00814g),gene5655(YALI0_E34881g),gene6545(YALI0_F19712g),gene6753(YALI0_F24431g)	gene1305(YALI0_B10978g),gene1391(YALI0_B12958g),gene1513(YALI0_B15664g),gene1522(YALI0_B15884g),gene1646(YALI0_B18590g),gene1692(YALI0_B19646g),gene204(YALI0_A05137g),gene2272(YALI0_C09350g),gene2424(YALI0_C12918g),gene2636(YALI0_C18205g),gene2651(YALI0_C18513g),gene2680(YALI0_C19195g),gene2795(YALI0_C21780g),gene2947(YALI0_D00715g),gene3131(YALI0_D05071g),gene356(YALI0_A09042g),gene3691(YALI0_D1…
BP	GO:0000466	maturation of 5.8S rRNA from tricistronic rRNA transcript (SSU-rRNA, 5.8S rRNA, LSU-rRNA)	0	10	10	17	0.02661	0.493187	-	gene1016(YALI0_B04136g),gene1197(YALI0_B08514g),gene1363(YALI0_B12320g),gene3151(YALI0_D05511g),gene3404(YALI0_D11000g),gene4291(YALI0_E04444g),gene4305(YALI0_E04741g),gene4805(YALI0_E16258g),gene5257(YALI0_E26389g),gene5574(YALI0_E33121g)
BP	GO:0007007	inner mitochondrial membrane organization	0	10	10	17	0.02661	0.493187	-	gene1692(YALI0_B19646g),gene2466(YALI0_C14036g),gene2795(YALI0_C21780g),gene3214(YALI0_D06908g),gene4144(YALI0_E01188g),gene4321(YALI0_E05115g),gene4372(YALI0_E06237g),gene6799(YALI0_F25509g),gene6909(YALI0_F27929g),gene6985(YALI0_F29931g)
BP	GO:0030258	lipid modification	16	2	18	36	0.02719	0.50181	gene1280(YALI0_B10406g),gene2890(YALI0_C23859g),gene2922(YALI0_D00176g),gene3715(YALI0_D18403g),gene3984(YALI0_D24750g),gene4385(YALI0_E06567g),gene4581(YALI0_E11099g),gene4905(YALI0_E18568g),gene5313(YALI0_E27654g),gene5562(YALI0_E32835g),gene6147(YALI0_F10857g),gene6207(YALI0_F12177g),gene6653(YALI0_F22121g),gene6937(YALI0_F28567g),gene794(YALI0_A20207g),gene99(YALI0_A02453g)	gene1198(YALI0_B08536g),gene5334(YALI0_E28153g)
MF	GO:0071949	FAD binding	10	2	12	21	0.02748	0.505032	gene1244(YALI0_B09625g),gene2890(YALI0_C23859g),gene3984(YALI0_D24750g),gene4236(YALI0_E03212g),gene4385(YALI0_E06567g),gene5313(YALI0_E27654g),gene5562(YALI0_E32835g),gene6121(YALI0_F10197g),gene6147(YALI0_F10857g),gene7017(YALI0_F30591g)	gene356(YALI0_A09042g),gene3612(YALI0_D15928g)
MF	GO:0016616	oxidoreductase activity, acting on the CH-OH group of donors, NAD or NADP as acceptor	27	12	39	87	0.02778	0.508409	gene1142(YALI0_B07117g),gene1176(YALI0_B08052g),gene1494(YALI0_B15268g),gene1790(YALI0_B21780g),gene1822(YALI0_B22506g),gene2246(YALI0_C08811g),gene2262(YALI0_C09119g),gene2443(YALI0_C13508g),gene2728(YALI0_C20251g),gene3016(YALI0_D02321g),gene3087(YALI0_D04092g),gene3170(YALI0_D05929g),gene3195(YALI0_D06501g),gene3221(YALI0_D07062g),gene3303(YALI0_D08844g),gene4236(YALI0_E03212g),gene4345(YALI0_…	gene1536(YALI0_B16192g),gene1682(YALI0_B19382g),gene1704(YALI0_B19976g),gene1879(YALI0_C00319g),gene1883(YALI0_C00407g),gene2214(YALI0_C08074g),gene3050(YALI0_D03135g),gene4871(YALI0_E17787g),gene4908(YALI0_E18634g),gene6599(YALI0_F20900g),gene6774(YALI0_F24937g),gene6945(YALI0_F28765g)
CC	GO:0005743	mitochondrial inner membrane	6	53	59	144	0.02898	0.528161	gene2497(YALI0_C14806g),gene2888(YALI0_C23815g),gene4127(YALI0_E00814g),gene5655(YALI0_E34881g),gene6545(YALI0_F19712g),gene6753(YALI0_F24431g)	gene1305(YALI0_B10978g),gene1391(YALI0_B12958g),gene1513(YALI0_B15664g),gene1522(YALI0_B15884g),gene1646(YALI0_B18590g),gene1692(YALI0_B19646g),gene204(YALI0_A05137g),gene2272(YALI0_C09350g),gene2424(YALI0_C12918g),gene2636(YALI0_C18205g),gene2651(YALI0_C18513g),gene2680(YALI0_C19195g),gene2795(YALI0_C21780g),gene2947(YALI0_D00715g),gene3131(YALI0_D05071g),gene356(YALI0_A09042g),gene3691(YALI0_D1…
BP	GO:0006040	amino sugar metabolic process	9	0	9	15	0.03015	0.547204	gene1772(YALI0_B21428g),gene1927(YALI0_C01419g),gene2288(YALI0_C09680g),gene3052(YALI0_D03179g),gene3790(YALI0_D20152g),gene4033(YALI0_D25938g),gene4977(YALI0_E20163g),gene5863(YALI0_F04466g),gene5865(YALI0_F04532g)	-
MF	GO:0016614	oxidoreductase activity, acting on CH-OH group of donors	27	13	40	90	0.03029	0.547473	gene1142(YALI0_B07117g),gene1176(YALI0_B08052g),gene1494(YALI0_B15268g),gene1790(YALI0_B21780g),gene1822(YALI0_B22506g),gene2246(YALI0_C08811g),gene2262(YALI0_C09119g),gene2443(YALI0_C13508g),gene2728(YALI0_C20251g),gene3016(YALI0_D02321g),gene3087(YALI0_D04092g),gene3170(YALI0_D05929g),gene3195(YALI0_D06501g),gene3221(YALI0_D07062g),gene3303(YALI0_D08844g),gene4236(YALI0_E03212g),gene4345(YALI0_…	gene1436(YALI0_B14014g),gene1536(YALI0_B16192g),gene1682(YALI0_B19382g),gene1704(YALI0_B19976g),gene1879(YALI0_C00319g),gene1883(YALI0_C00407g),gene2214(YALI0_C08074g),gene3050(YALI0_D03135g),gene4871(YALI0_E17787g),gene4908(YALI0_E18634g),gene6599(YALI0_F20900g),gene6774(YALI0_F24937g),gene6945(YALI0_F28765g)
CC	GO:0015934	large ribosomal subunit	1	34	35	80	0.03074	0.55332	gene3497(YALI0_D13104g)	gene114(YALI0_A02849g),gene1177(YALI0_B08074g),gene1220(YALI0_B09075g),gene1306(YALI0_B11000g),gene1607(YALI0_B17732g),gene2242(YALI0_C08723g),gene2334(YALI0_C10802g),gene2565(YALI0_C16478g),gene2633(YALI0_C18139g),gene2766(YALI0_C21109g),gene3358(YALI0_D10065g),gene3462(YALI0_D12320g),gene3476(YALI0_D12606g),gene3483(YALI0_D12771g),gene3484(YALI0_D12793g),gene3869(YALI0_D22088g),gene3914(YALI0_D…
BP	GO:0009110	vitamin biosynthetic process	6	6	12	22	0.03179	0.567549	gene1215(YALI0_B08965g),gene1661(YALI0_B18898g),gene3195(YALI0_D06501g),gene3274(YALI0_D08250g),gene3589(YALI0_D15400g),gene4996(YALI0_E20603g)	gene1096(YALI0_B06006g),gene2532(YALI0_C15554g),gene3544(YALI0_D14322g),gene384(YALI0_A09768g),gene4281(YALI0_E04224g),gene6599(YALI0_F20900g)
BP	GO:0042364	water-soluble vitamin biosynthetic process	6	6	12	22	0.03179	0.567549	gene1215(YALI0_B08965g),gene1661(YALI0_B18898g),gene3195(YALI0_D06501g),gene3274(YALI0_D08250g),gene3589(YALI0_D15400g),gene4996(YALI0_E20603g)	gene1096(YALI0_B06006g),gene2532(YALI0_C15554g),gene3544(YALI0_D14322g),gene384(YALI0_A09768g),gene4281(YALI0_E04224g),gene6599(YALI0_F20900g)
BP	GO:1901071	glucosamine-containing compound metabolic process	8	0	8	13	0.03399	0.57806	gene1772(YALI0_B21428g),gene1927(YALI0_C01419g),gene2288(YALI0_C09680g),gene3052(YALI0_D03179g),gene4033(YALI0_D25938g),gene4977(YALI0_E20163g),gene5863(YALI0_F04466g),gene5865(YALI0_F04532g)	-
BP	GO:1902475	L-alpha-amino acid transmembrane transport	6	2	8	13	0.03399	0.57806	gene2390(YALI0_C12100g),gene3209(YALI0_D06798g),gene3770(YALI0_D19646g),gene4856(YALI0_E17457g),gene5817(YALI0_F03498g),gene6812(YALI0_F25795g)	gene4501(YALI0_E09284g),gene5986(YALI0_F07106g)
BP	GO:0098656	anion transmembrane transport	23	11	34	78	0.03526	0.57806	gene1240(YALI0_B09537g),gene1551(YALI0_B16522g),gene1616(YALI0_B17930g),gene1680(YALI0_B19338g),gene1685(YALI0_B19470g),gene2390(YALI0_C12100g),gene2598(YALI0_C17237g),gene2718(YALI0_C20053g),gene2865(YALI0_C23298g),gene3004(YALI0_D02046g),gene3209(YALI0_D06798g),gene3323(YALI0_D09295g),gene3590(YALI0_D15422g),gene3770(YALI0_D19646g),gene3959(YALI0_D24145g),gene4856(YALI0_E17457g),gene5001(YALI0_…	gene1709(YALI0_B20064g),gene2530(YALI0_C15488g),gene2777(YALI0_C21406g),gene3788(YALI0_D20108g),gene4487(YALI0_E09015g),gene4501(YALI0_E09284g),gene5975(YALI0_F06842g),gene5986(YALI0_F07106g),gene652(YALI0_A16863g),gene6552(YALI0_F19866g),gene6690(YALI0_F23023g)
BP	GO:0043648	dicarboxylic acid metabolic process	11	5	16	32	0.03635	0.57806	gene1153(YALI0_B07359g),gene1244(YALI0_B09625g),gene1245(YALI0_B09647g),gene1706(YALI0_B19998g),gene2057(YALI0_C04433g),gene3886(YALI0_D22484g),gene4138(YALI0_E01056g),gene4513(YALI0_E09603g),gene4809(YALI0_E16346g),gene6458(YALI0_F17820g),gene6963(YALI0_F29337g)	gene2158(YALI0_C06776g),gene396(YALI0_A10032g),gene4908(YALI0_E18634g),gene6044(YALI0_F08415g),gene965(YALI0_B02852g)
BP	GO:0072330	monocarboxylic acid biosynthetic process	5	11	16	32	0.03635	0.57806	gene1661(YALI0_B18898g),gene1681(YALI0_B19360g),gene3589(YALI0_D15400g),gene4795(YALI0_E16016g),gene748(YALI0_A19096g)	gene1096(YALI0_B06006g),gene1485(YALI0_B15059g),gene1682(YALI0_B19382g),gene2360(YALI0_C11407g),gene3972(YALI0_D24431g),gene520(YALI0_A13387g),gene5650(YALI0_E34793g),gene5970(YALI0_F06754g),gene6599(YALI0_F20900g),gene6919(YALI0_F28149g),gene7021(YALI0_F30679g)
CC	GO:0030689	Noc complex	0	3	3	3	0.03665	0.57806	-	gene3449(YALI0_D12012g),gene6042(YALI0_F08371g),gene6571(YALI0_F20284g)
CC	GO:0034457	Mpp10 complex	0	3	3	3	0.03665	0.57806	-	gene1264(YALI0_B10065g),gene3947(YALI0_D23859g),gene6438(YALI0_F17380g)
CC	GO:0042719	mitochondrial intermembrane space protein transporter complex	0	3	3	3	0.03665	0.57806	-	gene3214(YALI0_D06908g),gene4321(YALI0_E05115g),gene4372(YALI0_E06237g)
CC	GO:0043614	multi-eIF complex	0	3	3	3	0.03665	0.57806	-	gene2557(YALI0_C16247g),gene6512(YALI0_F18942g),gene887(YALI0_B01034g)
CC	GO:0071006	U2-type catalytic step 1 spliceosome	0	3	3	3	0.03665	0.57806	-	gene2037(YALI0_C03982g),gene5608(YALI0_E33847g),gene6953(YALI0_F29073g)
CC	GO:0071012	catalytic step 1 spliceosome	0	3	3	3	0.03665	0.57806	-	gene2037(YALI0_C03982g),gene5608(YALI0_E33847g),gene6953(YALI0_F29073g)
BP	GO:0000460	maturation of 5.8S rRNA	0	11	11	20	0.03669	0.57806	-	gene1016(YALI0_B04136g),gene1197(YALI0_B08514g),gene1363(YALI0_B12320g),gene3151(YALI0_D05511g),gene3404(YALI0_D11000g),gene3727(YALI0_D18700g),gene4291(YALI0_E04444g),gene4305(YALI0_E04741g),gene4805(YALI0_E16258g),gene5257(YALI0_E26389g),gene5574(YALI0_E33121g)
MF	GO:0016746	transferase activity, transferring acyl groups	25	25	50	117	0.03671	0.57806	gene1375(YALI0_B12584g),gene1720(YALI0_B20328g),gene2467(YALI0_C14058g),gene2922(YALI0_D00176g),gene3189(YALI0_D06391g),gene3264(YALI0_D07986g),gene3452(YALI0_D12078g),gene37(YALI0_A00957g),gene3747(YALI0_D19140g),gene3790(YALI0_D20152g),gene3945(YALI0_D23815g),gene4105(YALI0_E00330g),gene4128(YALI0_E00836g),gene4340(YALI0_E05533g),gene4531(YALI0_E09999g),gene4581(YALI0_E11099g),gene4783(YALI0_E1…	gene1084(YALI0_B05742g),gene1198(YALI0_B08536g),gene1377(YALI0_B12628g),gene1470(YALI0_B14751g),gene1485(YALI0_B15059g),gene1682(YALI0_B19382g),gene2006(YALI0_C03267g),gene2366(YALI0_C11539g),gene2466(YALI0_C14036g),gene3084(YALI0_D04026g),gene3261(YALI0_D07920g),gene3753(YALI0_D19272g),gene3972(YALI0_D24431g),gene411(YALI0_A10362g),gene4173(YALI0_E01804g),gene418(YALI0_A10571g),gene4266(YALI0_E0…
BP	GO:0000052	citrulline metabolic process	0	3	3	3	0.03674	0.57806	-	gene2895(YALI0_C23969g),gene3568(YALI0_D14894g),gene4509(YALI0_E09493g)
BP	GO:0006044	N-acetylglucosamine metabolic process	3	0	3	3	0.03674	0.57806	gene1927(YALI0_C01419g),gene4977(YALI0_E20163g),gene5863(YALI0_F04466g)	-
BP	GO:0006528	asparagine metabolic process	1	2	3	3	0.03674	0.57806	gene1153(YALI0_B07359g)	gene520(YALI0_A13387g),gene6919(YALI0_F28149g)
BP	GO:0006574	valine catabolic process	2	1	3	3	0.03674	0.57806	gene1945(YALI0_C01859g),gene5778(YALI0_F02607g)	gene3181(YALI0_D06215g)
BP	GO:0009228	thiamine biosynthetic process	0	3	3	3	0.03674	0.57806	-	gene2532(YALI0_C15554g),gene384(YALI0_A09768g),gene4281(YALI0_E04224g)
BP	GO:0015846	polyamine transport	2	1	3	3	0.03674	0.57806	gene1019(YALI0_B04202g),gene2541(YALI0_C15807g)	gene5794(YALI0_F02959g)
BP	GO:0019240	citrulline biosynthetic process	0	3	3	3	0.03674	0.57806	-	gene2895(YALI0_C23969g),gene3568(YALI0_D14894g),gene4509(YALI0_E09493g)
BP	GO:0032042	mitochondrial DNA metabolic process	0	3	3	3	0.03674	0.57806	-	gene1270(YALI0_B10197g),gene4852(YALI0_E17369g),gene6531(YALI0_F19404g)
BP	GO:0032978	protein insertion into membrane from inner side	0	3	3	3	0.03674	0.57806	-	gene1692(YALI0_B19646g),gene6259(YALI0_F13387g),gene7079(YALI0_F32021g)
BP	GO:0032979	protein insertion into mitochondrial membrane from inner side	0	3	3	3	0.03674	0.57806	-	gene1692(YALI0_B19646g),gene6259(YALI0_F13387g),gene7079(YALI0_F32021g)
BP	GO:0042724	thiamine-containing compound biosynthetic process	0	3	3	3	0.03674	0.57806	-	gene2532(YALI0_C15554g),gene384(YALI0_A09768g),gene4281(YALI0_E04224g)
BP	GO:0046348	amino sugar catabolic process	3	0	3	3	0.03674	0.57806	gene1927(YALI0_C01419g),gene4977(YALI0_E20163g),gene5865(YALI0_F04532g)	-
BP	GO:0051031	tRNA transport	0	3	3	3	0.03674	0.57806	-	gene278(YALI0_A07084g),gene4297(YALI0_E04576g),gene5499(YALI0_E31625g)
BP	GO:0051204	protein insertion into mitochondrial membrane	0	3	3	3	0.03674	0.57806	-	gene1692(YALI0_B19646g),gene6259(YALI0_F13387g),gene7079(YALI0_F32021g)
BP	GO:0070900	mitochondrial tRNA modification	0	3	3	3	0.03674	0.57806	-	gene3150(YALI0_D05489g),gene3261(YALI0_D07920g),gene4402(YALI0_E06941g)
BP	GO:0071034	CUT catabolic process	0	3	3	3	0.03674	0.57806	-	gene3151(YALI0_D05511g),gene4291(YALI0_E04444g),gene5574(YALI0_E33121g)
BP	GO:0071043	CUT metabolic process	0	3	3	3	0.03674	0.57806	-	gene3151(YALI0_D05511g),gene4291(YALI0_E04444g),gene5574(YALI0_E33121g)
BP	GO:1900864	mitochondrial RNA modification	0	3	3	3	0.03674	0.57806	-	gene3150(YALI0_D05489g),gene3261(YALI0_D07920g),gene4402(YALI0_E06941g)
BP	GO:1901072	glucosamine-containing compound catabolic process	3	0	3	3	0.03674	0.57806	gene1927(YALI0_C01419g),gene4977(YALI0_E20163g),gene5865(YALI0_F04532g)	-
BP	GO:1902047	polyamine transmembrane transport	2	1	3	3	0.03674	0.57806	gene1019(YALI0_B04202g),gene2541(YALI0_C15807g)	gene5794(YALI0_F02959g)
MF	GO:0000049	tRNA binding	0	13	13	24	0.03701	0.578149	-	gene1092(YALI0_B05918g),gene1273(YALI0_B10263g),gene1688(YALI0_B19558g),gene2333(YALI0_C10780g),gene2652(YALI0_C18535g),gene3680(YALI0_D17600g),gene3936(YALI0_D23639g),gene4297(YALI0_E04576g),gene4394(YALI0_E06765g),gene4507(YALI0_E09449g),gene4877(YALI0_E17919g),gene5456(YALI0_E30723g),gene6232(YALI0_F12771g)
MF	GO:0003724	RNA helicase activity	0	13	13	24	0.03701	0.578149	-	gene1568(YALI0_B16896g),gene1778(YALI0_B21538g),gene1825(YALI0_B22572g),gene3331(YALI0_D09449g),gene3913(YALI0_D23133g),gene3975(YALI0_D24497g),gene4172(YALI0_E01782g),gene4207(YALI0_E02552g),gene473(YALI0_A12133g),gene5631(YALI0_E34353g),gene6929(YALI0_F28391g),gene7059(YALI0_F31493g),gene798(YALI0_A20328g)
BP	GO:0008152	metabolic process	445	563	1008	2956	0.03781	0.578831	gene1013(YALI0_B04070g),gene1023(YALI0_B04290g),gene1033(YALI0_B04510g),gene1036(YALI0_B04598g),gene1051(YALI0_B04906g),gene1057(YALI0_B05038g),gene1064(YALI0_B05258g),gene1071(YALI0_B05434g),gene1073(YALI0_B05478g),gene1075(YALI0_B05522g),gene108(YALI0_A02673g),gene1080(YALI0_B05654g),gene11(YALI0_A00369g),gene1112(YALI0_B06413g),gene1138(YALI0_B07029g),gene1140(YALI0_B07073g),gene1142(YALI0_B07…	gene1002(YALI0_B03784g),gene1006(YALI0_B03916g),gene1016(YALI0_B04136g),gene1043(YALI0_B04752g),gene1044(YALI0_B04774g),gene1048(YALI0_B04851g),gene1059(YALI0_B05126g),gene1079(YALI0_B05632g),gene1084(YALI0_B05742g),gene1092(YALI0_B05918g),gene1096(YALI0_B06006g),gene1101(YALI0_B06116g),gene1118(YALI0_B06578g),gene114(YALI0_A02849g),gene1197(YALI0_B08514g),gene1198(YALI0_B08536g),gene1201(YALI0_B…
CC	GO:0005744	mitochondrial inner membrane presequence translocase complex	0	7	7	11	0.03781	0.578831	-	gene1391(YALI0_B12958g),gene2651(YALI0_C18513g),gene2947(YALI0_D00715g),gene4759(YALI0_E15136g),gene5798(YALI0_F03047g),gene6909(YALI0_F27929g),gene6958(YALI0_F29183g)
CC	GO:0030688	preribosome, small subunit precursor	0	7	7	11	0.03781	0.578831	-	gene2047(YALI0_C04213g),gene2823(YALI0_C22385g),gene3294(YALI0_D08668g),gene4463(YALI0_E08448g),gene6042(YALI0_F08371g),gene6369(YALI0_F15829g),gene6571(YALI0_F20284g)
BP	GO:0009082	branched-chain amino acid biosynthetic process	1	6	7	11	0.03798	0.578831	gene2972(YALI0_D01265g)	gene1876(YALI0_C00253g),gene1883(YALI0_C00407g),gene2871(YALI0_C23408g),gene3023(YALI0_D02497g),gene3050(YALI0_D03135g),gene901(YALI0_B01364g)
BP	GO:0072348	sulfur compound transport	4	3	7	11	0.03798	0.578831	gene1616(YALI0_B17930g),gene5160(YALI0_E24167g),gene5284(YALI0_E26983g),gene984(YALI0_B03344g)	gene2293(YALI0_C09823g),gene2680(YALI0_C19195g),gene6690(YALI0_F23023g)
BP	GO:1901699	cellular response to nitrogen compound	5	2	7	11	0.03798	0.578831	gene1795(YALI0_B21890g),gene3035(YALI0_D02783g),gene3886(YALI0_D22484g),gene4809(YALI0_E16346g),gene5318(YALI0_E27742g)	gene3706(YALI0_D18150g),gene4641(YALI0_E12375g)
BP	GO:1990542	mitochondrial transmembrane transport	0	7	7	11	0.03798	0.578831	-	gene2795(YALI0_C21780g),gene3214(YALI0_D06908g),gene4321(YALI0_E05115g),gene4372(YALI0_E06237g),gene4501(YALI0_E09284g),gene6909(YALI0_F27929g),gene6985(YALI0_F29931g)
MF	GO:0016747	transferase activity, transferring acyl groups other than amino-acyl groups	22	21	43	99	0.03817	0.579707	gene1375(YALI0_B12584g),gene1720(YALI0_B20328g),gene2467(YALI0_C14058g),gene2922(YALI0_D00176g),gene3189(YALI0_D06391g),gene3264(YALI0_D07986g),gene3452(YALI0_D12078g),gene37(YALI0_A00957g),gene3790(YALI0_D20152g),gene3945(YALI0_D23815g),gene4128(YALI0_E00836g),gene4340(YALI0_E05533g),gene4531(YALI0_E09999g),gene4581(YALI0_E11099g),gene4905(YALI0_E18568g),gene5325(YALI0_E27896g),gene5559(YALI0_E3…	gene1084(YALI0_B05742g),gene1198(YALI0_B08536g),gene1377(YALI0_B12628g),gene1470(YALI0_B14751g),gene1485(YALI0_B15059g),gene1682(YALI0_B19382g),gene2006(YALI0_C03267g),gene2366(YALI0_C11539g),gene3084(YALI0_D04026g),gene3261(YALI0_D07920g),gene3753(YALI0_D19272g),gene411(YALI0_A10362g),gene4173(YALI0_E01804g),gene418(YALI0_A10571g),gene5970(YALI0_F06754g),gene6051(YALI0_F08591g),gene6180(YALI0_F1…
MF	GO:0005506	iron ion binding	9	9	18	36	0.03887	0.583386	gene1428(YALI0_B13838g),gene1706(YALI0_B19998g),gene1792(YALI0_B21824g),gene2302(YALI0_C10054g),gene2324(YALI0_C10604g),gene4293(YALI0_E04488g),gene5125(YALI0_E23474g),gene5238(YALI0_E25982g),gene559(YALI0_A14498g)	gene1059(YALI0_B05126g),gene1427(YALI0_B13816g),gene1757(YALI0_B21098g),gene384(YALI0_A09768g),gene5826(YALI0_F03663g),gene6166(YALI0_F11297g),gene696(YALI0_A17941g),gene923(YALI0_B01848g),gene965(YALI0_B02852g)
MF	GO:0003985	acetyl-CoA C-acetyltransferase activity	2	1	3	3	0.04092	0.583386	gene2922(YALI0_D00176g),gene4581(YALI0_E11099g)	gene1198(YALI0_B08536g)
MF	GO:0004000	adenosine deaminase activity	0	3	3	3	0.04092	0.583386	-	gene1639(YALI0_B18436g),gene4699(YALI0_E13728g),gene5265(YALI0_E26543g)
MF	GO:0004340	glucokinase activity	3	0	3	3	0.04092	0.583386	gene1813(YALI0_B22308g),gene4773(YALI0_E15488g),gene4979(YALI0_E20207g)	-
MF	GO:0004396	hexokinase activity	3	0	3	3	0.04092	0.583386	gene1813(YALI0_B22308g),gene4773(YALI0_E15488g),gene4979(YALI0_E20207g)	-
MF	GO:0005536	glucose binding	3	0	3	3	0.04092	0.583386	gene1813(YALI0_B22308g),gene4773(YALI0_E15488g),gene4979(YALI0_E20207g)	-
MF	GO:0008131	primary amine oxidase activity	3	0	3	3	0.04092	0.583386	gene2641(YALI0_C18315g),gene2841(YALI0_C22792g),gene636(YALI0_A16445g)	-
MF	GO:0008172	S-methyltransferase activity	2	1	3	3	0.04092	0.583386	gene4337(YALI0_E05467g),gene4656(YALI0_E12683g)	gene6805(YALI0_F25641g)
MF	GO:0008251	tRNA-specific adenosine deaminase activity	0	3	3	3	0.04092	0.583386	-	gene1639(YALI0_B18436g),gene4699(YALI0_E13728g),gene5265(YALI0_E26543g)
MF	GO:0008865	fructokinase activity	3	0	3	3	0.04092	0.583386	gene1813(YALI0_B22308g),gene4773(YALI0_E15488g),gene4979(YALI0_E20207g)	-
MF	GO:0015203	polyamine transmembrane transporter activity	2	1	3	3	0.04092	0.583386	gene1019(YALI0_B04202g),gene2541(YALI0_C15807g)	gene5794(YALI0_F02959g)
MF	GO:0016300	tRNA (uracil) methyltransferase activity	0	3	3	3	0.04092	0.583386	-	gene3486(YALI0_D12837g),gene4002(YALI0_D25212g),gene6567(YALI0_F20196g)
MF	GO:0016453	C-acetyltransferase activity	2	1	3	3	0.04092	0.583386	gene2922(YALI0_D00176g),gene4581(YALI0_E11099g)	gene1198(YALI0_B08536g)
MF	GO:0016639	oxidoreductase activity, acting on the CH-NH2 group of donors, NAD or NADP as acceptor	3	0	3	3	0.04092	0.583386	gene1706(YALI0_B19998g),gene4513(YALI0_E09603g),gene6458(YALI0_F17820g)	-
MF	GO:0016743	carboxyl- or carbamoyltransferase activity	0	3	3	3	0.04092	0.583386	-	gene2895(YALI0_C23969g),gene3568(YALI0_D14894g),gene4509(YALI0_E09493g)
MF	GO:0019158	mannokinase activity	3	0	3	3	0.04092	0.583386	gene1813(YALI0_B22308g),gene4773(YALI0_E15488g),gene4979(YALI0_E20207g)	-
MF	GO:0047536	2-aminoadipate transaminase activity	3	0	3	3	0.04092	0.583386	gene2088(YALI0_C05258g),gene4458(YALI0_E08360g),gene5013(YALI0_E20977g)	-
MF	GO:1990189	peptide-serine-N-acetyltransferase activity	2	1	3	3	0.04092	0.583386	gene869(YALI0_B00638g),gene916(YALI0_B01716g)	gene1084(YALI0_B05742g)
MF	GO:0004521	endoribonuclease activity	4	18	22	46	0.04136	0.583386	gene1775(YALI0_B21494g),gene494(YALI0_A12705g),gene6814(YALI0_F25839g),gene6846(YALI0_F26543g)	gene1043(YALI0_B04752g),gene2029(YALI0_C03784g),gene218(YALI0_A05555g),gene253(YALI0_A06523g),gene3131(YALI0_D05071g),gene3706(YALI0_D18150g),gene4390(YALI0_E06677g),gene493(YALI0_A12683g),gene5267(YALI0_E26587g),gene5357(YALI0_E28600g),gene5377(YALI0_E29007g),gene579(YALI0_A15059g),gene5797(YALI0_F03025g),gene5969(YALI0_F06732g),gene6369(YALI0_F15829g),gene6404(YALI0_F16643g),gene714(YALI0_A1829…
BP	GO:0009719	response to endogenous stimulus	5	1	6	9	0.04181	0.583386	gene1795(YALI0_B21890g),gene3035(YALI0_D02783g),gene3886(YALI0_D22484g),gene4809(YALI0_E16346g),gene5318(YALI0_E27742g)	gene4641(YALI0_E12375g)
BP	GO:0016180	snRNA processing	0	6	6	9	0.04181	0.583386	-	gene1197(YALI0_B08514g),gene3151(YALI0_D05511g),gene3208(YALI0_D06776g),gene3404(YALI0_D11000g),gene5574(YALI0_E33121g),gene6569(YALI0_F20240g)
BP	GO:0034472	snRNA 3'-end processing	0	6	6	9	0.04181	0.583386	-	gene1197(YALI0_B08514g),gene3151(YALI0_D05511g),gene3208(YALI0_D06776g),gene3404(YALI0_D11000g),gene5574(YALI0_E33121g),gene6569(YALI0_F20240g)
BP	GO:0050667	homocysteine metabolic process	6	0	6	9	0.04181	0.583386	gene2942(YALI0_D00605g),gene3671(YALI0_D17402g),gene4000(YALI0_D25168g),gene5926(YALI0_F05874g),gene5929(YALI0_F05940g),gene6465(YALI0_F17974g)	-
BP	GO:0071417	cellular response to organonitrogen compound	5	1	6	9	0.04181	0.583386	gene1795(YALI0_B21890g),gene3035(YALI0_D02783g),gene3886(YALI0_D22484g),gene4809(YALI0_E16346g),gene5318(YALI0_E27742g)	gene4641(YALI0_E12375g)
BP	GO:0071495	cellular response to endogenous stimulus	5	1	6	9	0.04181	0.583386	gene1795(YALI0_B21890g),gene3035(YALI0_D02783g),gene3886(YALI0_D22484g),gene4809(YALI0_E16346g),gene5318(YALI0_E27742g)	gene4641(YALI0_E12375g)
MF	GO:0004620	phospholipase activity	7	5	12	22	0.04188	0.583386	gene2046(YALI0_C04180g),gene3272(YALI0_D08206g),gene4797(YALI0_E16060g),gene5655(YALI0_E34881g),gene5950(YALI0_F06358g),gene6036(YALI0_F08217g),gene643(YALI0_A16610g)	gene1526(YALI0_B15972g),gene1660(YALI0_B18876g),gene3691(YALI0_D17842g),gene5612(YALI0_E33935g),gene919(YALI0_B01771g)
MF	GO:0016782	transferase activity, transferring sulfur-containing groups	4	4	8	13	0.04204	0.583755	gene3589(YALI0_D15400g),gene4015(YALI0_D25542g),gene6848(YALI0_F26587g),gene862(YALI0_B00462g)	gene1273(YALI0_B10263g),gene2631(YALI0_C18095g),gene5467(YALI0_E30965g),gene6780(YALI0_F25069g)
BP	GO:0006418	tRNA aminoacylation for protein translation	0	17	17	35	0.04265	0.590352	-	gene1092(YALI0_B05918g),gene2333(YALI0_C10780g),gene2645(YALI0_C18425g),gene2652(YALI0_C18535g),gene3067(YALI0_D03619g),gene3599(YALI0_D15620g),gene369(YALI0_A09427g),gene3936(YALI0_D23639g),gene4313(YALI0_E04939g),gene4673(YALI0_E13123g),gene4877(YALI0_E17919g),gene4880(YALI0_E17985g),gene5180(YALI0_E24607g),gene5383(YALI0_E29139g),gene5766(YALI0_F02299g),gene6841(YALI0_F26433g),gene6981(YALI0_F…
CC	GO:0030677	ribonuclease P complex	0	5	5	7	0.04456	0.597558	-	gene1043(YALI0_B04752g),gene2029(YALI0_C03784g),gene5267(YALI0_E26587g),gene5377(YALI0_E29007g),gene6243(YALI0_F13068g)
CC	GO:0033588	Elongator holoenzyme complex	0	5	5	7	0.04456	0.597558	-	gene1377(YALI0_B12628g),gene2870(YALI0_C23386g),gene4170(YALI0_E01738g),gene6588(YALI0_F20658g),gene6642(YALI0_F21879g)
BP	GO:0006448	regulation of translational elongation	0	5	5	7	0.04471	0.597558	-	gene4384(YALI0_E06545g),gene6310(YALI0_F14553g),gene6650(YALI0_F22055g),gene6776(YALI0_F24981g),gene785(YALI0_A19954g)
BP	GO:0006551	leucine metabolic process	3	2	5	7	0.04471	0.597558	gene1824(YALI0_B22550g),gene2972(YALI0_D01265g),gene4651(YALI0_E12595g)	gene1883(YALI0_C00407g),gene901(YALI0_B01364g)
BP	GO:0031125	rRNA 3'-end processing	0	5	5	7	0.04471	0.597558	-	gene1197(YALI0_B08514g),gene3151(YALI0_D05511g),gene3404(YALI0_D11000g),gene4291(YALI0_E04444g),gene5574(YALI0_E33121g)
BP	GO:0001678	cellular glucose homeostasis	4	0	4	5	0.04481	0.597558	gene1813(YALI0_B22308g),gene2141(YALI0_C06424g),gene4773(YALI0_E15488g),gene4979(YALI0_E20207g)	-
BP	GO:0007584	response to nutrient	4	0	4	5	0.04481	0.597558	gene2267(YALI0_C09232g),gene3035(YALI0_D02783g),gene5318(YALI0_E27742g),gene5886(YALI0_F05038g)	-
BP	GO:0016556	mRNA modification	1	3	4	5	0.04481	0.597558	gene11(YALI0_A00369g)	gene2418(YALI0_C12749g),gene4003(YALI0_D25234g),gene6477(YALI0_F18216g)
BP	GO:0033500	carbohydrate homeostasis	4	0	4	5	0.04481	0.597558	gene1813(YALI0_B22308g),gene2141(YALI0_C06424g),gene4773(YALI0_E15488g),gene4979(YALI0_E20207g)	-
BP	GO:0033615	mitochondrial proton-transporting ATP synthase complex assembly	0	4	4	5	0.04481	0.597558	-	gene1588(YALI0_B17314g),gene4167(YALI0_E01672g),gene4324(YALI0_E05181g),gene6145(YALI0_F10769g)
BP	GO:0042593	glucose homeostasis	4	0	4	5	0.04481	0.597558	gene1813(YALI0_B22308g),gene2141(YALI0_C06424g),gene4773(YALI0_E15488g),gene4979(YALI0_E20207g)	-
BP	GO:0051180	vitamin transport	0	4	4	5	0.04481	0.597558	-	gene2293(YALI0_C09823g),gene3235(YALI0_D07392g),gene5975(YALI0_F06842g),gene652(YALI0_A16863g)
MF	GO:0016407	acetyltransferase activity	18	13	31	69	0.04505	0.598932	gene1375(YALI0_B12584g),gene1720(YALI0_B20328g),gene2467(YALI0_C14058g),gene2922(YALI0_D00176g),gene3189(YALI0_D06391g),gene3452(YALI0_D12078g),gene37(YALI0_A00957g),gene3790(YALI0_D20152g),gene3945(YALI0_D23815g),gene4128(YALI0_E00836g),gene4340(YALI0_E05533g),gene4531(YALI0_E09999g),gene4581(YALI0_E11099g),gene5325(YALI0_E27896g),gene5625(YALI0_E34221g),gene596(YALI0_A15444g),gene869(YALI0_B006…	gene1084(YALI0_B05742g),gene1198(YALI0_B08536g),gene1377(YALI0_B12628g),gene1470(YALI0_B14751g),gene1485(YALI0_B15059g),gene2006(YALI0_C03267g),gene2366(YALI0_C11539g),gene3753(YALI0_D19272g),gene418(YALI0_A10571g),gene6051(YALI0_F08591g),gene6180(YALI0_F11605g),gene6209(YALI0_F12221g),gene6462(YALI0_F17897g)
MF	GO:0015171	amino acid transmembrane transporter activity	15	4	19	39	0.04583	0.607456	gene1240(YALI0_B09537g),gene1551(YALI0_B16522g),gene1680(YALI0_B19338g),gene2390(YALI0_C12100g),gene2598(YALI0_C17237g),gene3004(YALI0_D02046g),gene3209(YALI0_D06798g),gene3323(YALI0_D09295g),gene3590(YALI0_D15422g),gene3770(YALI0_D19646g),gene4856(YALI0_E17457g),gene5001(YALI0_E20713g),gene5817(YALI0_F03498g),gene6812(YALI0_F25795g),gene6992(YALI0_F30063g)	gene1709(YALI0_B20064g),gene4501(YALI0_E09284g),gene5986(YALI0_F07106g),gene6552(YALI0_F19866g)
MF	GO:0004549	tRNA-specific ribonuclease activity	0	7	7	11	0.04605	0.608528	-	gene1043(YALI0_B04752g),gene2029(YALI0_C03784g),gene5267(YALI0_E26587g),gene5357(YALI0_E28600g),gene5377(YALI0_E29007g),gene714(YALI0_A18293g),gene86(YALI0_A02178g)
MF	GO:0042887	amide transmembrane transporter activity	11	10	21	44	0.04676	0.614971	gene0(YALI0_A00110g),gene1019(YALI0_B04202g),gene157(YALI0_A03949g),gene2541(YALI0_C15807g),gene2584(YALI0_C16907g),gene4938(YALI0_E19294g),gene5358(YALI0_E28622g),gene6099(YALI0_F09691g),gene6282(YALI0_F13959g),gene6395(YALI0_F16423g),gene6513(YALI0_F18964g)	gene2293(YALI0_C09823g),gene278(YALI0_A07084g),gene4759(YALI0_E15136g),gene4861(YALI0_E17589g),gene5409(YALI0_E29711g),gene5975(YALI0_F06842g),gene6123(YALI0_F10241g),gene6958(YALI0_F29183g),gene7046(YALI0_F31207g),gene933(YALI0_B02090g)
MF	GO:0016298	lipase activity	9	5	14	27	0.04691	0.614971	gene1175(YALI0_B08030g),gene2046(YALI0_C04180g),gene3272(YALI0_D08206g),gene3677(YALI0_D17534g),gene4797(YALI0_E16060g),gene5655(YALI0_E34881g),gene5950(YALI0_F06358g),gene6036(YALI0_F08217g),gene643(YALI0_A16610g)	gene1526(YALI0_B15972g),gene1660(YALI0_B18876g),gene3691(YALI0_D17842g),gene5612(YALI0_E33935g),gene919(YALI0_B01771g)
MF	GO:0008080	N-acetyltransferase activity	14	11	25	54	0.047	0.614971	gene1375(YALI0_B12584g),gene1720(YALI0_B20328g),gene2467(YALI0_C14058g),gene3189(YALI0_D06391g),gene3452(YALI0_D12078g),gene37(YALI0_A00957g),gene3790(YALI0_D20152g),gene4340(YALI0_E05533g),gene4531(YALI0_E09999g),gene5325(YALI0_E27896g),gene5625(YALI0_E34221g),gene596(YALI0_A15444g),gene869(YALI0_B00638g),gene916(YALI0_B01716g)	gene1084(YALI0_B05742g),gene1377(YALI0_B12628g),gene1470(YALI0_B14751g),gene2006(YALI0_C03267g),gene2366(YALI0_C11539g),gene3753(YALI0_D19272g),gene418(YALI0_A10571g),gene6051(YALI0_F08591g),gene6180(YALI0_F11605g),gene6209(YALI0_F12221g),gene6462(YALI0_F17897g)
MF	GO:0046873	metal ion transmembrane transporter activity	13	10	23	49	0.0471	0.614971	gene1613(YALI0_B17864g),gene2314(YALI0_C10311g),gene2929(YALI0_D00319g),gene3121(YALI0_D04873g),gene3324(YALI0_D09317g),gene4070(YALI0_D26818g),gene4124(YALI0_E00748g),gene4189(YALI0_E02156g),gene4508(YALI0_E09471g),gene4598(YALI0_E11473g),gene5146(YALI0_E23859g),gene5162(YALI0_E24211g),gene957(YALI0_B02684g)	gene1781(YALI0_B21604g),gene2397(YALI0_C12254g),gene2731(YALI0_C20295g),gene2949(YALI0_D00759g),gene3207(YALI0_D06754g),gene4237(YALI0_E03234g),gene6508(YALI0_F18854g),gene6546(YALI0_F19734g),gene6632(YALI0_F21659g),gene6746(YALI0_F24277g)
MF	GO:0046914	transition metal ion binding	60	36	96	242	0.04725	0.615094	gene1033(YALI0_B04510g),gene1057(YALI0_B05038g),gene1075(YALI0_B05522g),gene1247(YALI0_B09713g),gene1428(YALI0_B13838g),gene1635(YALI0_B18348g),gene1706(YALI0_B19998g),gene1792(YALI0_B21824g),gene2300(YALI0_C10010g),gene2302(YALI0_C10054g),gene2321(YALI0_C10494g),gene2324(YALI0_C10604g),gene2513(YALI0_C15202g),gene2571(YALI0_C16621g),gene2641(YALI0_C18315g),gene2648(YALI0_C18475g),gene2649(YALI0_…	gene1048(YALI0_B04851g),gene1059(YALI0_B05126g),gene1427(YALI0_B13816g),gene1660(YALI0_B18876g),gene1757(YALI0_B21098g),gene2850(YALI0_C22990g),gene2860(YALI0_C23210g),gene3207(YALI0_D06754g),gene321(YALI0_A08151g),gene3495(YALI0_D13068g),gene3563(YALI0_D14762g),gene3800(YALI0_D20394g),gene3832(YALI0_D21164g),gene384(YALI0_A09768g),gene4496(YALI0_E09196g),gene4699(YALI0_E13728g),gene4871(YALI0_E1…
BP	GO:0071027	nuclear RNA surveillance	2	7	9	16	0.04897	0.633712	gene6066(YALI0_F08943g),gene6765(YALI0_F24717g)	gene1197(YALI0_B08514g),gene3151(YALI0_D05511g),gene3208(YALI0_D06776g),gene3404(YALI0_D11000g),gene4291(YALI0_E04444g),gene5574(YALI0_E33121g),gene6569(YALI0_F20240g)
BP	GO:0071028	nuclear mRNA surveillance	2	7	9	16	0.04897	0.633712	gene6066(YALI0_F08943g),gene6765(YALI0_F24717g)	gene1197(YALI0_B08514g),gene3151(YALI0_D05511g),gene3208(YALI0_D06776g),gene3404(YALI0_D11000g),gene4291(YALI0_E04444g),gene5574(YALI0_E33121g),gene6569(YALI0_F20240g)
MF	GO:0003899	DNA-directed 5'-3' RNA polymerase activity	0	16	16	32	0.05009	0.642503	-	gene1048(YALI0_B04851g),gene3193(YALI0_D06457g),gene321(YALI0_A08151g),gene3254(YALI0_D07788g),gene3761(YALI0_D19448g),gene3809(YALI0_D20592g),gene4326(YALI0_E05225g),gene4524(YALI0_E09845g),gene468(YALI0_A12001g),gene5149(YALI0_E23947g),gene5808(YALI0_F03300g),gene5941(YALI0_F06182g),gene6053(YALI0_F08635g),gene6081(YALI0_F09295g),gene6277(YALI0_F13783g),gene6445(YALI0_F17534g)
MF	GO:0034062	5'-3' RNA polymerase activity	0	16	16	32	0.05009	0.642503	-	gene1048(YALI0_B04851g),gene3193(YALI0_D06457g),gene321(YALI0_A08151g),gene3254(YALI0_D07788g),gene3761(YALI0_D19448g),gene3809(YALI0_D20592g),gene4326(YALI0_E05225g),gene4524(YALI0_E09845g),gene468(YALI0_A12001g),gene5149(YALI0_E23947g),gene5808(YALI0_F03300g),gene5941(YALI0_F06182g),gene6053(YALI0_F08635g),gene6081(YALI0_F09295g),gene6277(YALI0_F13783g),gene6445(YALI0_F17534g)
MF	GO:0097747	RNA polymerase activity	0	16	16	32	0.05009	0.642503	-	gene1048(YALI0_B04851g),gene3193(YALI0_D06457g),gene321(YALI0_A08151g),gene3254(YALI0_D07788g),gene3761(YALI0_D19448g),gene3809(YALI0_D20592g),gene4326(YALI0_E05225g),gene4524(YALI0_E09845g),gene468(YALI0_A12001g),gene5149(YALI0_E23947g),gene5808(YALI0_F03300g),gene5941(YALI0_F06182g),gene6053(YALI0_F08635g),gene6081(YALI0_F09295g),gene6277(YALI0_F13783g),gene6445(YALI0_F17534g)
BP	GO:0042221	response to chemical	45	18	63	159	0.0508	0.647098	gene1194(YALI0_B08448g),gene1795(YALI0_B21890g),gene1903(YALI0_C00847g),gene2014(YALI0_C03465g),gene2059(YALI0_C04477g),gene2096(YALI0_C05467g),gene2141(YALI0_C06424g),gene2201(YALI0_C07722g),gene2267(YALI0_C09232g),gene2571(YALI0_C16621g),gene2593(YALI0_C17105g),gene261(YALI0_A06699g),gene293(YALI0_A07447g),gene3035(YALI0_D02783g),gene3343(YALI0_D09735g),gene3819(YALI0_D20834g),gene3886(YALI0_D2…	gene1006(YALI0_B03916g),gene1561(YALI0_B16742g),gene1609(YALI0_B17776g),gene1710(YALI0_B20086g),gene1759(YALI0_B21142g),gene3706(YALI0_D18150g),gene3865(YALI0_D22000g),gene3871(YALI0_D22132g),gene4641(YALI0_E12375g),gene4816(YALI0_E16533g),gene5428(YALI0_E30151g),gene5447(YALI0_E30547g),gene5627(YALI0_E34265g),gene5794(YALI0_F02959g),gene6284(YALI0_F13981g),gene6529(YALI0_F19360g),gene6581(YALI0_…
MF	GO:0008410	CoA-transferase activity	3	1	4	5	0.05104	0.647098	gene4015(YALI0_D25542g),gene6848(YALI0_F26587g),gene862(YALI0_B00462g)	gene5467(YALI0_E30965g)
MF	GO:0016813	hydrolase activity, acting on carbon-nitrogen (but not peptide) bonds, in linear amidines	4	0	4	5	0.05104	0.647098	gene105(YALI0_A02607g),gene3712(YALI0_D18337g),gene4425(YALI0_E07535g),gene5968(YALI0_F06710g)	-
MF	GO:0051183	vitamin transporter activity	0	4	4	5	0.05104	0.647098	-	gene2293(YALI0_C09823g),gene3235(YALI0_D07392g),gene5975(YALI0_F06842g),gene652(YALI0_A16863g)
BP	GO:1901607	alpha-amino acid biosynthetic process	19	15	34	80	0.05122	0.647504	gene1681(YALI0_B19360g),gene1706(YALI0_B19998g),gene2057(YALI0_C04433g),gene2088(YALI0_C05258g),gene2942(YALI0_D00605g),gene2972(YALI0_D01265g),gene3493(YALI0_D13024g),gene3886(YALI0_D22484g),gene4128(YALI0_E00836g),gene4656(YALI0_E12683g),gene4809(YALI0_E16346g),gene5013(YALI0_E20977g),gene559(YALI0_A14498g),gene5685(YALI0_F00506g),gene5926(YALI0_F05874g),gene6458(YALI0_F17820g),gene6963(YALI0_F…	gene1876(YALI0_C00253g),gene1883(YALI0_C00407g),gene2085(YALI0_C05170g),gene2895(YALI0_C23969g),gene3023(YALI0_D02497g),gene3050(YALI0_D03135g),gene3234(YALI0_D07370g),gene3568(YALI0_D14894g),gene4215(YALI0_E02728g),gene4509(YALI0_E09493g),gene4742(YALI0_E14751g),gene520(YALI0_A13387g),gene6805(YALI0_F25641g),gene6919(YALI0_F28149g),gene901(YALI0_B01364g)
MF	GO:0004022	alcohol dehydrogenase (NAD) activity	4	1	5	7	0.05204	0.650351	gene4432(YALI0_E07766g),gene4787(YALI0_E15818g),gene583(YALI0_A15147g),gene633(YALI0_A16379g)	gene4871(YALI0_E17787g)
MF	GO:0004526	ribonuclease P activity	0	5	5	7	0.05204	0.650351	-	gene1043(YALI0_B04752g),gene2029(YALI0_C03784g),gene5267(YALI0_E26587g),gene5377(YALI0_E29007g),gene86(YALI0_A02178g)
MF	GO:0009982	pseudouridine synthase activity	0	5	5	7	0.05204	0.650351	-	gene2418(YALI0_C12749g),gene2987(YALI0_D01628g),gene4003(YALI0_D25234g),gene6208(YALI0_F12199g),gene6477(YALI0_F18216g)
MF	GO:0051184	cofactor transporter activity	1	4	5	7	0.05204	0.650351	gene5284(YALI0_E26983g)	gene2293(YALI0_C09823g),gene2680(YALI0_C19195g),gene5975(YALI0_F06842g),gene652(YALI0_A16863g)
BP	GO:0042273	ribosomal large subunit biogenesis	1	25	26	59	0.05312	0.661957	gene3497(YALI0_D13104g)	gene1344(YALI0_B11880g),gene1363(YALI0_B12320g),gene154(YALI0_A03905g),gene1557(YALI0_B16654g),gene1634(YALI0_B18326g),gene206(YALI0_A05181g),gene251(YALI0_A06479g),gene3449(YALI0_D12012g),gene3727(YALI0_D18700g),gene3769(YALI0_D19624g),gene3869(YALI0_D22088g),gene4172(YALI0_E01782g),gene4210(YALI0_E02618g),gene4536(YALI0_E10109g),gene4593(YALI0_E11363g),gene474(YALI0_A12155g),gene4805(YALI0_E162…
MF	GO:0010181	FMN binding	9	4	13	25	0.05336	0.663059	gene1112(YALI0_B06413g),gene1138(YALI0_B07029g),gene1706(YALI0_B19998g),gene2700(YALI0_C19646g),gene2701(YALI0_C19668g),gene2971(YALI0_D01243g),gene3619(YALI0_D16247g),gene4810(YALI0_E16368g),gene4902(YALI0_E18502g)	gene2230(YALI0_C08459g),gene3102(YALI0_D04422g),gene3544(YALI0_D14322g),gene6718(YALI0_F23661g)
CC	GO:0031312	extrinsic component of organelle membrane	0	8	8	14	0.05635	0.698229	-	gene1513(YALI0_B15664g),gene1522(YALI0_B15884g),gene2636(YALI0_C18205g),gene356(YALI0_A09042g),gene4763(YALI0_E15224g),gene5544(YALI0_E32483g),gene6145(YALI0_F10769g),gene6878(YALI0_F27247g)
BP	GO:0031167	rRNA methylation	0	8	8	14	0.05661	0.699347	-	gene3341(YALI0_D09691g),gene4125(YALI0_E00770g),gene4159(YALI0_E01496g),gene5187(YALI0_E24761g),gene5516(YALI0_E31933g),gene5958(YALI0_F06512g),gene6449(YALI0_F17622g),gene6993(YALI0_F30085g)
BP	GO:1901700	response to oxygen-containing compound	7	6	13	26	0.05676	0.699347	gene1795(YALI0_B21890g),gene2014(YALI0_C03465g),gene2141(YALI0_C06424g),gene2571(YALI0_C16621g),gene3886(YALI0_D22484g),gene4809(YALI0_E16346g),gene7035(YALI0_F30987g)	gene1561(YALI0_B16742g),gene1710(YALI0_B20086g),gene4641(YALI0_E12375g),gene5627(YALI0_E34265g),gene6581(YALI0_F20504g),gene6621(YALI0_F21406g)
MF	GO:0004812	aminoacyl-tRNA ligase activity	0	17	17	35	0.05898	0.724659	-	gene1092(YALI0_B05918g),gene2333(YALI0_C10780g),gene2645(YALI0_C18425g),gene2652(YALI0_C18535g),gene3067(YALI0_D03619g),gene3599(YALI0_D15620g),gene369(YALI0_A09427g),gene3936(YALI0_D23639g),gene4313(YALI0_E04939g),gene4673(YALI0_E13123g),gene4877(YALI0_E17919g),gene4880(YALI0_E17985g),gene5180(YALI0_E24607g),gene5383(YALI0_E29139g),gene5766(YALI0_F02299g),gene6841(YALI0_F26433g),gene6981(YALI0_F…
MF	GO:0015291	secondary active transmembrane transporter activity	19	13	32	73	0.05953	0.729368	gene1111(YALI0_B06391g),gene1204(YALI0_B08712g),gene1616(YALI0_B17930g),gene1685(YALI0_B19470g),gene2141(YALI0_C06424g),gene2195(YALI0_C07590g),gene2718(YALI0_C20053g),gene2965(YALI0_D01111g),gene354(YALI0_A08998g),gene4066(YALI0_D26730g),gene4189(YALI0_E02156g),gene5146(YALI0_E23859g),gene5284(YALI0_E26983g),gene5565(YALI0_E32901g),gene6471(YALI0_F18084g),gene6545(YALI0_F19712g),gene6801(YALI0_F…	gene1294(YALI0_B10736g),gene2293(YALI0_C09823g),gene2397(YALI0_C12254g),gene2530(YALI0_C15488g),gene2777(YALI0_C21406g),gene3788(YALI0_D20108g),gene422(YALI0_A10659g),gene4487(YALI0_E09015g),gene5409(YALI0_E29711g),gene5971(YALI0_F06776g),gene6546(YALI0_F19734g),gene6690(YALI0_F23023g),gene6731(YALI0_F23903g)
BP	GO:0065002	intracellular protein transmembrane transport	5	20	25	57	0.06048	0.73394	gene1691(YALI0_B19624g),gene5661(YALI0_E35046g),gene6204(YALI0_F12111g),gene6715(YALI0_F23595g),gene6790(YALI0_F25289g)	gene1391(YALI0_B12958g),gene2168(YALI0_C06974g),gene2651(YALI0_C18513g),gene278(YALI0_A07084g),gene2795(YALI0_C21780g),gene2944(YALI0_D00649g),gene2947(YALI0_D00715g),gene3108(YALI0_D04554g),gene3214(YALI0_D06908g),gene3831(YALI0_D21142g),gene4321(YALI0_E05115g),gene4372(YALI0_E06237g),gene4759(YALI0_E15136g),gene5457(YALI0_E30745g),gene5798(YALI0_F03047g),gene5838(YALI0_F03949g),gene6909(YALI0_F…
MF	GO:0005507	copper ion binding	11	1	12	23	0.06079	0.73394	gene2641(YALI0_C18315g),gene2648(YALI0_C18475g),gene2649(YALI0_C18481g),gene2719(YALI0_C20060g),gene2720(YALI0_C20066g),gene2841(YALI0_C22792g),gene636(YALI0_A16445g),gene796(YALI0_A20273g),gene957(YALI0_B02684g),gene96(YALI0_A02416g),gene97(YALI0_A02423g)	gene3207(YALI0_D06754g)
MF	GO:0046915	transition metal ion transmembrane transporter activity	4	8	12	23	0.06079	0.73394	gene4070(YALI0_D26818g),gene4124(YALI0_E00748g),gene4508(YALI0_E09471g),gene957(YALI0_B02684g)	gene1781(YALI0_B21604g),gene2397(YALI0_C12254g),gene2731(YALI0_C20295g),gene2949(YALI0_D00759g),gene3207(YALI0_D06754g),gene6546(YALI0_F19734g),gene6632(YALI0_F21659g),gene6746(YALI0_F24277g)
MF	GO:0004180	carboxypeptidase activity	9	0	9	16	0.06091	0.73394	gene1064(YALI0_B05258g),gene1901(YALI0_C00803g),gene2787(YALI0_C21604g),gene2881(YALI0_C23661g),gene3266(YALI0_D08052g),gene4708(YALI0_E13970g),gene6398(YALI0_F16489g),gene6792(YALI0_F25333g),gene903(YALI0_B01408g)	-
MF	GO:0015103	inorganic anion transmembrane transporter activity	7	2	9	16	0.06091	0.73394	gene1616(YALI0_B17930g),gene2195(YALI0_C07590g),gene2718(YALI0_C20053g),gene3959(YALI0_D24145g),gene5146(YALI0_E23859g),gene5160(YALI0_E24167g),gene984(YALI0_B03344g)	gene4487(YALI0_E09015g),gene6690(YALI0_F23023g)
MF	GO:0030515	snoRNA binding	0	9	9	16	0.06091	0.73394	-	gene2047(YALI0_C04213g),gene2799(YALI0_C21846g),gene3740(YALI0_D18986g),gene3947(YALI0_D23859g),gene5673(YALI0_F00242g),gene6042(YALI0_F08371g),gene6302(YALI0_F14377g),gene6438(YALI0_F17380g),gene812(YALI0_A20614g)
MF	GO:0016410	N-acyltransferase activity	14	12	26	58	0.06468	0.777226	gene1375(YALI0_B12584g),gene1720(YALI0_B20328g),gene2467(YALI0_C14058g),gene3189(YALI0_D06391g),gene3452(YALI0_D12078g),gene37(YALI0_A00957g),gene3790(YALI0_D20152g),gene4340(YALI0_E05533g),gene4531(YALI0_E09999g),gene5325(YALI0_E27896g),gene5625(YALI0_E34221g),gene596(YALI0_A15444g),gene869(YALI0_B00638g),gene916(YALI0_B01716g)	gene1084(YALI0_B05742g),gene1377(YALI0_B12628g),gene1470(YALI0_B14751g),gene2006(YALI0_C03267g),gene2366(YALI0_C11539g),gene3084(YALI0_D04026g),gene3753(YALI0_D19272g),gene418(YALI0_A10571g),gene6051(YALI0_F08591g),gene6180(YALI0_F11605g),gene6209(YALI0_F12221g),gene6462(YALI0_F17897g)
MF	GO:0016620	oxidoreductase activity, acting on the aldehyde or oxo group of donors, NAD or NADP as acceptor	10	4	14	28	0.06487	0.777374	gene1245(YALI0_B09647g),gene1822(YALI0_B22506g),gene1945(YALI0_C01859g),gene3262(YALI0_D07942g),gene4722(YALI0_E14256g),gene5862(YALI0_F04444g),gene6831(YALI0_F26191g),gene693(YALI0_A17875g),gene762(YALI0_A19448g),gene898(YALI0_B01298g)	gene1704(YALI0_B19976g),gene2214(YALI0_C08074g),gene4771(YALI0_E15400g),gene6945(YALI0_F28765g)
BP	GO:0000463	maturation of LSU-rRNA from tricistronic rRNA transcript (SSU-rRNA, 5.8S rRNA, LSU-rRNA)	0	7	7	12	0.06544	0.779931	-	gene1363(YALI0_B12320g),gene154(YALI0_A03905g),gene4172(YALI0_E01782g),gene4593(YALI0_E11363g),gene4805(YALI0_E16258g),gene5257(YALI0_E26389g),gene6023(YALI0_F07953g)
BP	GO:0015850	organic hydroxy compound transport	3	4	7	12	0.06544	0.779931	gene1685(YALI0_B19470g),gene5565(YALI0_E32901g),gene6471(YALI0_F18084g)	gene2530(YALI0_C15488g),gene2777(YALI0_C21406g),gene3788(YALI0_D20108g),gene6731(YALI0_F23903g)
BP	GO:0016053	organic acid biosynthetic process	24	28	52	131	0.06897	0.817547	gene1661(YALI0_B18898g),gene1681(YALI0_B19360g),gene1706(YALI0_B19998g),gene2057(YALI0_C04433g),gene2088(YALI0_C05258g),gene2942(YALI0_D00605g),gene2972(YALI0_D01265g),gene3493(YALI0_D13024g),gene3589(YALI0_D15400g),gene3886(YALI0_D22484g),gene4128(YALI0_E00836g),gene4138(YALI0_E01056g),gene4656(YALI0_E12683g),gene4795(YALI0_E16016g),gene4809(YALI0_E16346g),gene5013(YALI0_E20977g),gene559(YALI0_A…	gene1096(YALI0_B06006g),gene1485(YALI0_B15059g),gene1682(YALI0_B19382g),gene1707(YALI0_B20020g),gene1876(YALI0_C00253g),gene1883(YALI0_C00407g),gene2085(YALI0_C05170g),gene2360(YALI0_C11407g),gene2871(YALI0_C23408g),gene2895(YALI0_C23969g),gene3023(YALI0_D02497g),gene3050(YALI0_D03135g),gene3234(YALI0_D07370g),gene3568(YALI0_D14894g),gene396(YALI0_A10032g),gene3972(YALI0_D24431g),gene4215(YALI0_E…
BP	GO:0046394	carboxylic acid biosynthetic process	24	28	52	131	0.06897	0.817547	gene1661(YALI0_B18898g),gene1681(YALI0_B19360g),gene1706(YALI0_B19998g),gene2057(YALI0_C04433g),gene2088(YALI0_C05258g),gene2942(YALI0_D00605g),gene2972(YALI0_D01265g),gene3493(YALI0_D13024g),gene3589(YALI0_D15400g),gene3886(YALI0_D22484g),gene4128(YALI0_E00836g),gene4138(YALI0_E01056g),gene4656(YALI0_E12683g),gene4795(YALI0_E16016g),gene4809(YALI0_E16346g),gene5013(YALI0_E20977g),gene559(YALI0_A…	gene1096(YALI0_B06006g),gene1485(YALI0_B15059g),gene1682(YALI0_B19382g),gene1707(YALI0_B20020g),gene1876(YALI0_C00253g),gene1883(YALI0_C00407g),gene2085(YALI0_C05170g),gene2360(YALI0_C11407g),gene2871(YALI0_C23408g),gene2895(YALI0_C23969g),gene3023(YALI0_D02497g),gene3050(YALI0_D03135g),gene3234(YALI0_D07370g),gene3568(YALI0_D14894g),gene396(YALI0_A10032g),gene3972(YALI0_D24431g),gene4215(YALI0_E…
MF	GO:0022892	substrate-specific transporter activity	70	46	116	301	0.07059	0.834488	gene0(YALI0_A00110g),gene1019(YALI0_B04202g),gene1111(YALI0_B06391g),gene1204(YALI0_B08712g),gene1240(YALI0_B09537g),gene1551(YALI0_B16522g),gene157(YALI0_A03949g),gene1613(YALI0_B17864g),gene1616(YALI0_B17930g),gene1680(YALI0_B19338g),gene1685(YALI0_B19470g),gene2141(YALI0_C06424g),gene2149(YALI0_C06578g),gene2195(YALI0_C07590g),gene2314(YALI0_C10311g),gene2390(YALI0_C12100g),gene2541(YALI0_C158…	gene1294(YALI0_B10736g),gene1426(YALI0_B13794g),gene1530(YALI0_B16060g),gene1709(YALI0_B20064g),gene1781(YALI0_B21604g),gene2293(YALI0_C09823g),gene2397(YALI0_C12254g),gene2483(YALI0_C14498g),gene2530(YALI0_C15488g),gene2629(YALI0_C18051g),gene2731(YALI0_C20295g),gene2777(YALI0_C21406g),gene278(YALI0_A07084g),gene2949(YALI0_D00759g),gene3207(YALI0_D06754g),gene3304(YALI0_D08866g),gene3788(YALI0_D…
CC	GO:0005666	DNA-directed RNA polymerase III complex	0	9	9	17	0.07377	0.867863	-	gene1048(YALI0_B04851g),gene3193(YALI0_D06457g),gene3254(YALI0_D07788g),gene3761(YALI0_D19448g),gene3809(YALI0_D20592g),gene5149(YALI0_E23947g),gene5808(YALI0_F03300g),gene6053(YALI0_F08635g),gene6081(YALI0_F09295g)
BP	GO:0071806	protein transmembrane transport	5	20	25	58	0.07381	0.867863	gene1691(YALI0_B19624g),gene5661(YALI0_E35046g),gene6204(YALI0_F12111g),gene6715(YALI0_F23595g),gene6790(YALI0_F25289g)	gene1391(YALI0_B12958g),gene2168(YALI0_C06974g),gene2651(YALI0_C18513g),gene278(YALI0_A07084g),gene2795(YALI0_C21780g),gene2944(YALI0_D00649g),gene2947(YALI0_D00715g),gene3108(YALI0_D04554g),gene3214(YALI0_D06908g),gene3831(YALI0_D21142g),gene4321(YALI0_E05115g),gene4372(YALI0_E06237g),gene4759(YALI0_E15136g),gene5457(YALI0_E30745g),gene5798(YALI0_F03047g),gene5838(YALI0_F03949g),gene6909(YALI0_F…
BP	GO:0071025	RNA surveillance	2	7	9	17	0.07412	0.869171	gene6066(YALI0_F08943g),gene6765(YALI0_F24717g)	gene1197(YALI0_B08514g),gene3151(YALI0_D05511g),gene3208(YALI0_D06776g),gene3404(YALI0_D11000g),gene4291(YALI0_E04444g),gene5574(YALI0_E33121g),gene6569(YALI0_F20240g)
BP	GO:0034427	nuclear-transcribed mRNA catabolic process, exonucleolytic, 3'-5'	0	6	6	10	0.07558	0.883922	-	gene1197(YALI0_B08514g),gene3151(YALI0_D05511g),gene3208(YALI0_D06776g),gene3404(YALI0_D11000g),gene5574(YALI0_E33121g),gene6569(YALI0_F20240g)
BP	GO:0006360	transcription from RNA polymerase I promoter	0	13	13	27	0.07714	0.899761	-	gene1048(YALI0_B04851g),gene1349(YALI0_B11968g),gene2993(YALI0_D01782g),gene3193(YALI0_D06457g),gene321(YALI0_A08151g),gene4078(YALI0_D26994g),gene4165(YALI0_E01628g),gene4326(YALI0_E05225g),gene4524(YALI0_E09845g),gene5149(YALI0_E23947g),gene5400(YALI0_E29506g),gene5941(YALI0_F06182g),gene6277(YALI0_F13783g)
MF	GO:0004540	ribonuclease activity	4	22	26	59	0.07895	0.903657	gene1775(YALI0_B21494g),gene494(YALI0_A12705g),gene6814(YALI0_F25839g),gene6846(YALI0_F26543g)	gene1043(YALI0_B04752g),gene2029(YALI0_C03784g),gene218(YALI0_A05555g),gene2506(YALI0_C15048g),gene253(YALI0_A06523g),gene3131(YALI0_D05071g),gene3524(YALI0_D13750g),gene3706(YALI0_D18150g),gene4291(YALI0_E04444g),gene4390(YALI0_E06677g),gene493(YALI0_A12683g),gene5267(YALI0_E26587g),gene5304(YALI0_E27390g),gene5357(YALI0_E28600g),gene5377(YALI0_E29007g),gene579(YALI0_A15059g),gene5797(YALI0_F030…
CC	GO:0031414	N-terminal protein acetyltransferase complex	0	5	5	8	0.08672	0.903657	-	gene1084(YALI0_B05742g),gene2366(YALI0_C11539g),gene418(YALI0_A10571g),gene6051(YALI0_F08591g),gene6209(YALI0_F12221g)
BP	GO:0009084	glutamine family amino acid biosynthetic process	6	2	8	15	0.08685	0.903657	gene1706(YALI0_B19998g),gene2057(YALI0_C04433g),gene3493(YALI0_D13024g),gene5685(YALI0_F00506g),gene6458(YALI0_F17820g),gene753(YALI0_A19206g)	gene3234(YALI0_D07370g),gene3568(YALI0_D14894g)
MF	GO:0051213	dioxygenase activity	10	4	14	29	0.08688	0.903657	gene1793(YALI0_B21846g),gene2324(YALI0_C10604g),gene3243(YALI0_D07546g),gene3829(YALI0_D21098g),gene4163(YALI0_E01584g),gene4274(YALI0_E04070g),gene4683(YALI0_E13343g),gene559(YALI0_A14498g),gene6684(YALI0_F22825g),gene845(YALI0_A21439g)	gene1757(YALI0_B21098g),gene3612(YALI0_D15928g),gene6917(YALI0_F28105g),gene965(YALI0_B02852g)
BP	GO:0006544	glycine metabolic process	5	0	5	8	0.087	0.903657	gene3886(YALI0_D22484g),gene389(YALI0_A09856g),gene4809(YALI0_E16346g),gene5789(YALI0_F02849g),gene844(YALI0_A21417g)	-
BP	GO:0006829	zinc II ion transport	1	4	5	8	0.087	0.903657	gene4124(YALI0_E00748g)	gene2397(YALI0_C12254g),gene2949(YALI0_D00759g),gene6546(YALI0_F19734g),gene6632(YALI0_F21659g)
BP	GO:0015696	ammonium transport	3	2	5	8	0.087	0.903657	gene1019(YALI0_B04202g),gene2541(YALI0_C15807g),gene5294(YALI0_E27203g)	gene1426(YALI0_B13794g),gene754(YALI0_A19228g)
BP	GO:0032048	cardiolipin metabolic process	1	4	5	8	0.087	0.903657	gene5655(YALI0_E34881g)	gene2466(YALI0_C14036g),gene3691(YALI0_D17842g),gene4714(YALI0_E14102g),gene6726(YALI0_F23837g)
BP	GO:0046471	phosphatidylglycerol metabolic process	1	4	5	8	0.087	0.903657	gene5655(YALI0_E34881g)	gene2466(YALI0_C14036g),gene3691(YALI0_D17842g),gene4714(YALI0_E14102g),gene6726(YALI0_F23837g)
BP	GO:0051181	cofactor transport	1	4	5	8	0.087	0.903657	gene5284(YALI0_E26983g)	gene2293(YALI0_C09823g),gene2680(YALI0_C19195g),gene5975(YALI0_F06842g),gene652(YALI0_A16863g)
BP	GO:0071577	zinc II ion transmembrane transport	1	4	5	8	0.087	0.903657	gene4124(YALI0_E00748g)	gene2397(YALI0_C12254g),gene2949(YALI0_D00759g),gene6546(YALI0_F19734g),gene6632(YALI0_F21659g)
BP	GO:0072488	ammonium transmembrane transport	3	2	5	8	0.087	0.903657	gene1019(YALI0_B04202g),gene2541(YALI0_C15807g),gene5294(YALI0_E27203g)	gene1426(YALI0_B13794g),gene754(YALI0_A19228g)
BP	GO:2000765	regulation of cytoplasmic translation	0	5	5	8	0.087	0.903657	-	gene4384(YALI0_E06545g),gene6310(YALI0_F14553g),gene6650(YALI0_F22055g),gene6776(YALI0_F24981g),gene785(YALI0_A19954g)
BP	GO:0000470	maturation of LSU-rRNA	0	10	10	20	0.0902	0.903657	-	gene1363(YALI0_B12320g),gene154(YALI0_A03905g),gene3727(YALI0_D18700g),gene4172(YALI0_E01782g),gene4536(YALI0_E10109g),gene4593(YALI0_E11363g),gene4805(YALI0_E16258g),gene5257(YALI0_E26389g),gene6023(YALI0_F07953g),gene6578(YALI0_F20438g)
BP	GO:0008652	cellular amino acid biosynthetic process	19	17	36	89	0.09123	0.903657	gene1681(YALI0_B19360g),gene1706(YALI0_B19998g),gene2057(YALI0_C04433g),gene2088(YALI0_C05258g),gene2942(YALI0_D00605g),gene2972(YALI0_D01265g),gene3493(YALI0_D13024g),gene3886(YALI0_D22484g),gene4128(YALI0_E00836g),gene4656(YALI0_E12683g),gene4809(YALI0_E16346g),gene5013(YALI0_E20977g),gene559(YALI0_A14498g),gene5685(YALI0_F00506g),gene5926(YALI0_F05874g),gene6458(YALI0_F17820g),gene6963(YALI0_F…	gene1707(YALI0_B20020g),gene1876(YALI0_C00253g),gene1883(YALI0_C00407g),gene2085(YALI0_C05170g),gene2871(YALI0_C23408g),gene2895(YALI0_C23969g),gene3023(YALI0_D02497g),gene3050(YALI0_D03135g),gene3234(YALI0_D07370g),gene3568(YALI0_D14894g),gene4215(YALI0_E02728g),gene4509(YALI0_E09493g),gene4742(YALI0_E14751g),gene520(YALI0_A13387g),gene6805(YALI0_F25641g),gene6919(YALI0_F28149g),gene901(YALI0_B0…
BP	GO:0043038	amino acid activation	0	17	17	38	0.09274	0.903657	-	gene1092(YALI0_B05918g),gene2333(YALI0_C10780g),gene2645(YALI0_C18425g),gene2652(YALI0_C18535g),gene3067(YALI0_D03619g),gene3599(YALI0_D15620g),gene369(YALI0_A09427g),gene3936(YALI0_D23639g),gene4313(YALI0_E04939g),gene4673(YALI0_E13123g),gene4877(YALI0_E17919g),gene4880(YALI0_E17985g),gene5180(YALI0_E24607g),gene5383(YALI0_E29139g),gene5766(YALI0_F02299g),gene6841(YALI0_F26433g),gene6981(YALI0_F…
BP	GO:0043039	tRNA aminoacylation	0	17	17	38	0.09274	0.903657	-	gene1092(YALI0_B05918g),gene2333(YALI0_C10780g),gene2645(YALI0_C18425g),gene2652(YALI0_C18535g),gene3067(YALI0_D03619g),gene3599(YALI0_D15620g),gene369(YALI0_A09427g),gene3936(YALI0_D23639g),gene4313(YALI0_E04939g),gene4673(YALI0_E13123g),gene4877(YALI0_E17919g),gene4880(YALI0_E17985g),gene5180(YALI0_E24607g),gene5383(YALI0_E29139g),gene5766(YALI0_F02299g),gene6841(YALI0_F26433g),gene6981(YALI0_F…
MF	GO:0022804	active transmembrane transporter activity	34	19	53	132	0.09745	0.903657	gene1111(YALI0_B06391g),gene1204(YALI0_B08712g),gene1358(YALI0_B12188g),gene1392(YALI0_B12980g),gene1616(YALI0_B17930g),gene1685(YALI0_B19470g),gene2141(YALI0_C06424g),gene2195(YALI0_C07590g),gene2718(YALI0_C20053g),gene2729(YALI0_C20265g),gene2965(YALI0_D01111g),gene3121(YALI0_D04873g),gene354(YALI0_A08998g),gene3961(YALI0_D24189g),gene40(YALI0_A01023g),gene4028(YALI0_D25828g),gene4066(YALI0_D26…	gene1294(YALI0_B10736g),gene2293(YALI0_C09823g),gene2397(YALI0_C12254g),gene2530(YALI0_C15488g),gene2629(YALI0_C18051g),gene2777(YALI0_C21406g),gene278(YALI0_A07084g),gene3788(YALI0_D20108g),gene4130(YALI0_E00880g),gene422(YALI0_A10659g),gene4360(YALI0_E05973g),gene4487(YALI0_E09015g),gene449(YALI0_A11473g),gene5409(YALI0_E29711g),gene5971(YALI0_F06776g),gene6546(YALI0_F19734g),gene6566(YALI0_F20…
BP	GO:0090305	nucleic acid phosphodiester bond hydrolysis	7	40	47	120	0.09868	0.903657	gene1775(YALI0_B21494g),gene2884(YALI0_C23727g),gene3456(YALI0_D12166g),gene3794(YALI0_D20240g),gene494(YALI0_A12705g),gene6814(YALI0_F25839g),gene6846(YALI0_F26543g)	gene1002(YALI0_B03784g),gene1016(YALI0_B04136g),gene1043(YALI0_B04752g),gene1197(YALI0_B08514g),gene2029(YALI0_C03784g),gene218(YALI0_A05555g),gene2506(YALI0_C15048g),gene253(YALI0_A06523g),gene3131(YALI0_D05071g),gene3151(YALI0_D05511g),gene321(YALI0_A08151g),gene3404(YALI0_D11000g),gene3524(YALI0_D13750g),gene3571(YALI0_D14982g),gene3706(YALI0_D18150g),gene3727(YALI0_D18700g),gene4291(YALI0_E04…
BP	GO:0044281	small molecule metabolic process	105	90	195	545	0.09887	0.903657	gene1153(YALI0_B07359g),gene1215(YALI0_B08965g),gene1244(YALI0_B09625g),gene1245(YALI0_B09647g),gene1280(YALI0_B10406g),gene1319(YALI0_B11286g),gene1353(YALI0_B12078g),gene1537(YALI0_B16214g),gene1582(YALI0_B17204g),gene1661(YALI0_B18898g),gene1681(YALI0_B19360g),gene1706(YALI0_B19998g),gene1793(YALI0_B21846g),gene1813(YALI0_B22308g),gene1822(YALI0_B22506g),gene1824(YALI0_B22550g),gene1927(YALI0_…	gene1059(YALI0_B05126g),gene1092(YALI0_B05918g),gene1096(YALI0_B06006g),gene1198(YALI0_B08536g),gene1485(YALI0_B15059g),gene1513(YALI0_B15664g),gene1522(YALI0_B15884g),gene1536(YALI0_B16192g),gene1538(YALI0_B16236g),gene1660(YALI0_B18876g),gene1682(YALI0_B19382g),gene1704(YALI0_B19976g),gene1707(YALI0_B20020g),gene1859(YALI0_B23298g),gene1876(YALI0_C00253g),gene1883(YALI0_C00407g),gene1996(YALI0_…
CC	GO:0005655	nucleolar ribonuclease P complex	0	4	4	6	0.099	0.903657	-	gene1043(YALI0_B04752g),gene5267(YALI0_E26587g),gene5377(YALI0_E29007g),gene6243(YALI0_F13068g)
CC	GO:0030681	multimeric ribonuclease P complex	0	4	4	6	0.099	0.903657	-	gene1043(YALI0_B04752g),gene5267(YALI0_E26587g),gene5377(YALI0_E29007g),gene6243(YALI0_F13068g)
BP	GO:0006560	proline metabolic process	4	0	4	6	0.09926	0.903657	gene1244(YALI0_B09625g),gene1245(YALI0_B09647g),gene2057(YALI0_C04433g),gene753(YALI0_A19206g)	-
BP	GO:0009068	aspartate family amino acid catabolic process	3	1	4	6	0.09926	0.903657	gene1537(YALI0_B16214g),gene4340(YALI0_E05533g),gene844(YALI0_A21417g)	gene3023(YALI0_D02497g)
BP	GO:0015851	nucleobase transport	3	1	4	6	0.09926	0.903657	gene3773(YALI0_D19756g),gene5323(YALI0_E27852g),gene7016(YALI0_F30569g)	gene4438(YALI0_E07920g)
BP	GO:0018026	peptidyl-lysine monomethylation	0	4	4	6	0.09926	0.903657	-	gene1201(YALI0_B08624g),gene6601(YALI0_F20944g),gene6915(YALI0_F28061g),gene7004(YALI0_F30327g)
BP	GO:0070127	tRNA aminoacylation for mitochondrial protein translation	0	4	4	6	0.09926	0.903657	-	gene1092(YALI0_B05918g),gene2645(YALI0_C18425g),gene369(YALI0_A09427g),gene3936(YALI0_D23639g)
BP	GO:0070525	tRNA threonylcarbamoyladenosine metabolic process	0	4	4	6	0.09926	0.903657	-	gene3150(YALI0_D05489g),gene3261(YALI0_D07920g),gene4402(YALI0_E06941g),gene6089(YALI0_F09471g)
MF	GO:0005385	zinc ion transmembrane transporter activity	1	4	5	8	0.09992	0.903657	gene4124(YALI0_E00748g)	gene2397(YALI0_C12254g),gene2949(YALI0_D00759g),gene6546(YALI0_F19734g),gene6632(YALI0_F21659g)
MF	GO:0008519	ammonium transmembrane transporter activity	3	2	5	8	0.09992	0.903657	gene1019(YALI0_B04202g),gene2541(YALI0_C15807g),gene5294(YALI0_E27203g)	gene1426(YALI0_B13794g),gene754(YALI0_A19228g)
MF	GO:0015215	nucleotide transmembrane transporter activity	1	4	5	8	0.09992	0.903657	gene6545(YALI0_F19712g)	gene2483(YALI0_C14498g),gene422(YALI0_A10659g),gene5908(YALI0_F05500g),gene652(YALI0_A16863g)
MF	GO:0016597	amino acid binding	3	2	5	8	0.09992	0.903657	gene3886(YALI0_D22484g),gene389(YALI0_A09856g),gene4809(YALI0_E16346g)	gene3568(YALI0_D14894g),gene4509(YALI0_E09493g)
MF	GO:0043023	ribosomal large subunit binding	1	4	5	8	0.09992	0.903657	gene1262(YALI0_B10021g)	gene3495(YALI0_D13068g),gene428(YALI0_A10813g),gene5287(YALI0_E27049g),gene6031(YALI0_F08151g)
BP	GO:0010035	response to inorganic substance	3	4	7	13	0.10215	0.903657	gene2571(YALI0_C16621g),gene4337(YALI0_E05467g),gene7035(YALI0_F30987g)	gene1561(YALI0_B16742g),gene1710(YALI0_B20086g),gene5627(YALI0_E34265g),gene6621(YALI0_F21406g)
BP	GO:0016073	snRNA metabolic process	0	7	7	13	0.10215	0.903657	-	gene1197(YALI0_B08514g),gene3151(YALI0_D05511g),gene3208(YALI0_D06776g),gene3404(YALI0_D11000g),gene4291(YALI0_E04444g),gene5574(YALI0_E33121g),gene6569(YALI0_F20240g)
MF	GO:0036094	small molecule binding	133	143	276	756	0.10437	0.903657	gene1112(YALI0_B06413g),gene1138(YALI0_B07029g),gene1199(YALI0_B08558g),gene1244(YALI0_B09625g),gene1358(YALI0_B12188g),gene1392(YALI0_B12980g),gene1464(YALI0_B14619g),gene1518(YALI0_B15774g),gene1523(YALI0_B15906g),gene1537(YALI0_B16214g),gene1599(YALI0_B17556g),gene1681(YALI0_B19360g),gene1706(YALI0_B19998g),gene172(YALI0_A04367g),gene1743(YALI0_B20834g),gene1813(YALI0_B22308g),gene1822(YALI0_B…	gene1016(YALI0_B04136g),gene1092(YALI0_B05918g),gene1270(YALI0_B10197g),gene1309(YALI0_B11066g),gene1349(YALI0_B11968g),gene1420(YALI0_B13662g),gene1436(YALI0_B14014g),gene1470(YALI0_B14751g),gene1536(YALI0_B16192g),gene1568(YALI0_B16896g),gene1646(YALI0_B18590g),gene1647(YALI0_B18612g),gene1704(YALI0_B19976g),gene1757(YALI0_B21098g),gene1776(YALI0_B21516g),gene1778(YALI0_B21538g),gene1797(YALI0_…
MF	GO:0016814	hydrolase activity, acting on carbon-nitrogen (but not peptide) bonds, in cyclic amidines	4	4	8	15	0.1045	0.903657	gene3274(YALI0_D08250g),gene4138(YALI0_E01056g),gene4599(YALI0_E11495g),gene5227(YALI0_E25740g)	gene1639(YALI0_B18436g),gene2860(YALI0_C23210g),gene4699(YALI0_E13728g),gene5265(YALI0_E26543g)
BP	GO:0046148	pigment biosynthetic process	4	5	9	18	0.10586	0.903657	gene1353(YALI0_B12078g),gene4138(YALI0_E01056g),gene6534(YALI0_F19470g),gene6604(YALI0_F21010g)	gene5421(YALI0_E29975g),gene6594(YALI0_F20790g),gene6721(YALI0_F23727g),gene6762(YALI0_F24651g),gene6849(YALI0_F26609g)
BP	GO:1901701	cellular response to oxygen-containing compound	5	4	9	18	0.10586	0.903657	gene1795(YALI0_B21890g),gene2141(YALI0_C06424g),gene2571(YALI0_C16621g),gene3886(YALI0_D22484g),gene4809(YALI0_E16346g)	gene1561(YALI0_B16742g),gene1710(YALI0_B20086g),gene4641(YALI0_E12375g),gene6621(YALI0_F21406g)
BP	GO:0009108	coenzyme biosynthetic process	6	19	25	60	0.10617	0.903657	gene1661(YALI0_B18898g),gene2697(YALI0_C19580g),gene4138(YALI0_E01056g),gene4996(YALI0_E20603g),gene5029(YALI0_E21351g),gene852(YALI0_B00220g)	gene1096(YALI0_B06006g),gene1513(YALI0_B15664g),gene1522(YALI0_B15884g),gene2636(YALI0_C18205g),gene2661(YALI0_C18755g),gene3544(YALI0_D14322g),gene356(YALI0_A09042g),gene396(YALI0_A10032g),gene3972(YALI0_D24431g),gene4262(YALI0_E03806g),gene4763(YALI0_E15224g),gene5151(YALI0_E23991g),gene5319(YALI0_E27764g),gene5650(YALI0_E34793g),gene5930(YALI0_F05962g),gene6599(YALI0_F20900g),gene6878(YALI0_F2…
CC	GO:0001401	mitochondrial sorting and assembly machinery complex	0	3	3	4	0.11012	0.903657	-	gene2168(YALI0_C06974g),gene3108(YALI0_D04554g),gene3722(YALI0_D18590g)
CC	GO:0005851	eukaryotic translation initiation factor 2B complex	0	3	3	4	0.11012	0.903657	-	gene1515(YALI0_B15708g),gene2634(YALI0_C18161g),gene887(YALI0_B01034g)
CC	GO:0031415	NatA complex	0	3	3	4	0.11012	0.903657	-	gene1084(YALI0_B05742g),gene418(YALI0_A10571g),gene6209(YALI0_F12221g)
CC	GO:0070545	PeBoW complex	0	3	3	4	0.11012	0.903657	-	gene1363(YALI0_B12320g),gene2836(YALI0_C22704g),gene5257(YALI0_E26389g)
BP	GO:0006549	isoleucine metabolic process	0	3	3	4	0.11036	0.903657	-	gene1876(YALI0_C00253g),gene3023(YALI0_D02497g),gene3050(YALI0_D03135g)
BP	GO:0006565	L-serine catabolic process	3	0	3	4	0.11036	0.903657	gene1537(YALI0_B16214g),gene3886(YALI0_D22484g),gene4809(YALI0_E16346g)	-
BP	GO:0006567	threonine catabolic process	2	1	3	4	0.11036	0.903657	gene1537(YALI0_B16214g),gene844(YALI0_A21417g)	gene3023(YALI0_D02497g)
BP	GO:0006570	tyrosine metabolic process	3	0	3	4	0.11036	0.903657	gene1793(YALI0_B21846g),gene2088(YALI0_C05258g),gene5013(YALI0_E20977g)	-
BP	GO:0008272	sulfate transport	2	1	3	4	0.11036	0.903657	gene1616(YALI0_B17930g),gene984(YALI0_B03344g)	gene6690(YALI0_F23023g)
BP	GO:0009097	isoleucine biosynthetic process	0	3	3	4	0.11036	0.903657	-	gene1876(YALI0_C00253g),gene3023(YALI0_D02497g),gene3050(YALI0_D03135g)
BP	GO:0009099	valine biosynthetic process	1	2	3	4	0.11036	0.903657	gene2972(YALI0_D01265g)	gene1876(YALI0_C00253g),gene3050(YALI0_D03135g)
BP	GO:0014070	response to organic cyclic compound	2	1	3	4	0.11036	0.903657	gene3886(YALI0_D22484g),gene4809(YALI0_E16346g)	gene3706(YALI0_D18150g)
BP	GO:0015691	cadmium ion transport	1	2	3	4	0.11036	0.903657	gene4070(YALI0_D26818g)	gene2397(YALI0_C12254g),gene6546(YALI0_F19734g)
BP	GO:0015840	urea transport	3	0	3	4	0.11036	0.903657	gene1019(YALI0_B04202g),gene2541(YALI0_C15807g),gene5358(YALI0_E28622g)	-
BP	GO:0015939	pantothenate metabolic process	1	2	3	4	0.11036	0.903657	gene1661(YALI0_B18898g)	gene1096(YALI0_B06006g),gene6599(YALI0_F20900g)
BP	GO:0015940	pantothenate biosynthetic process	1	2	3	4	0.11036	0.903657	gene1661(YALI0_B18898g)	gene1096(YALI0_B06006g),gene6599(YALI0_F20900g)
BP	GO:0019755	one-carbon compound transport	3	0	3	4	0.11036	0.903657	gene1019(YALI0_B04202g),gene2541(YALI0_C15807g),gene5358(YALI0_E28622g)	-
BP	GO:0031670	cellular response to nutrient	3	0	3	4	0.11036	0.903657	gene2267(YALI0_C09232g),gene3035(YALI0_D02783g),gene5318(YALI0_E27742g)	-
BP	GO:0035965	cardiolipin acyl-chain remodeling	1	2	3	4	0.11036	0.903657	gene5655(YALI0_E34881g)	gene2466(YALI0_C14036g),gene3691(YALI0_D17842g)
BP	GO:0045943	positive regulation of transcription from RNA polymerase I promoter	0	3	3	4	0.11036	0.903657	-	gene1349(YALI0_B11968g),gene4165(YALI0_E01628g),gene5400(YALI0_E29506g)
BP	GO:0051182	coenzyme transport	1	2	3	4	0.11036	0.903657	gene5284(YALI0_E26983g)	gene2680(YALI0_C19195g),gene5975(YALI0_F06842g)
BP	GO:0070574	cadmium ion transmembrane transport	1	2	3	4	0.11036	0.903657	gene4070(YALI0_D26818g)	gene2397(YALI0_C12254g),gene6546(YALI0_F19734g)
BP	GO:0071407	cellular response to organic cyclic compound	2	1	3	4	0.11036	0.903657	gene3886(YALI0_D22484g),gene4809(YALI0_E16346g)	gene3706(YALI0_D18150g)
BP	GO:0071918	urea transmembrane transport	3	0	3	4	0.11036	0.903657	gene1019(YALI0_B04202g),gene2541(YALI0_C15807g),gene5358(YALI0_E28622g)	-
BP	GO:1902358	sulfate transmembrane transport	2	1	3	4	0.11036	0.903657	gene1616(YALI0_B17930g),gene984(YALI0_B03344g)	gene6690(YALI0_F23023g)
BP	GO:1990481	mRNA pseudouridine synthesis	0	3	3	4	0.11036	0.903657	-	gene2418(YALI0_C12749g),gene4003(YALI0_D25234g),gene6477(YALI0_F18216g)
CC	GO:0005835	fatty acid synthase complex	0	2	2	2	0.1104	0.903657	-	gene1485(YALI0_B15059g),gene1682(YALI0_B19382g)
CC	GO:0030692	Noc4p-Nop14p complex	0	2	2	2	0.1104	0.903657	-	gene6042(YALI0_F08371g),gene6571(YALI0_F20284g)
CC	GO:0031417	NatC complex	0	2	2	2	0.1104	0.903657	-	gene2366(YALI0_C11539g),gene6051(YALI0_F08591g)
CC	GO:0031511	Mis6-Sim4 complex	2	0	2	2	0.1104	0.903657	gene2902(YALI0_C24123g),gene5553(YALI0_E32659g)	-
CC	GO:0031515	tRNA (m1A) methyltransferase complex	0	2	2	2	0.1104	0.903657	-	gene1288(YALI0_B10582g),gene6680(YALI0_F22737g)
CC	GO:0032432	actin filament bundle	1	1	2	2	0.1104	0.903657	gene1602(YALI0_B17622g)	gene6007(YALI0_F07601g)
CC	GO:0032585	multivesicular body membrane	2	0	2	2	0.1104	0.903657	gene2138(YALI0_C06347g),gene5950(YALI0_F06358g)	-
CC	GO:0034245	mitochondrial DNA-directed RNA polymerase complex	0	2	2	2	0.1104	0.903657	-	gene468(YALI0_A12001g),gene928(YALI0_B01980g)
CC	GO:0034455	t-UTP complex	0	2	2	2	0.1104	0.903657	-	gene5400(YALI0_E29506g),gene6054(YALI0_F08657g)
CC	GO:0042721	mitochondrial inner membrane protein insertion complex	0	2	2	2	0.1104	0.903657	-	gene4321(YALI0_E05115g),gene6985(YALI0_F29931g)
CC	GO:0052718	tRNA-specific adenosine-34 deaminase complex	0	2	2	2	0.1104	0.903657	-	gene4699(YALI0_E13728g),gene5265(YALI0_E26543g)
CC	GO:0070761	pre-snoRNP complex	0	2	2	2	0.1104	0.903657	-	gene4593(YALI0_E11363g),gene6023(YALI0_F07953g)
CC	GO:0097344	Rix1 complex	0	2	2	2	0.1104	0.903657	-	gene3532(YALI0_D13948g),gene405(YALI0_A10252g)
BP	GO:0000737	DNA catabolic process, endonucleolytic	0	2	2	2	0.11058	0.903657	-	gene3131(YALI0_D05071g),gene6391(YALI0_F16335g)
BP	GO:0001079	nitrogen catabolite regulation of transcription from RNA polymerase II promoter	2	0	2	2	0.11058	0.903657	gene3035(YALI0_D02783g),gene5318(YALI0_E27742g)	-
BP	GO:0001080	nitrogen catabolite activation of transcription from RNA polymerase II promoter	2	0	2	2	0.11058	0.903657	gene3035(YALI0_D02783g),gene5318(YALI0_E27742g)	-
BP	GO:0002100	tRNA wobble adenosine to inosine editing	0	2	2	2	0.11058	0.903657	-	gene4699(YALI0_E13728g),gene5265(YALI0_E26543g)
BP	GO:0006046	N-acetylglucosamine catabolic process	2	0	2	2	0.11058	0.903657	gene1927(YALI0_C01419g),gene4977(YALI0_E20163g)	-
BP	GO:0006083	acetate metabolic process	0	2	2	2	0.11058	0.903657	-	gene5467(YALI0_E30965g),gene5930(YALI0_F05962g)
BP	GO:0006106	fumarate metabolic process	1	1	2	2	0.11058	0.903657	gene4513(YALI0_E09603g)	gene2158(YALI0_C06776g)
BP	GO:0006231	dTMP biosynthetic process	1	1	2	2	0.11058	0.903657	gene2339(YALI0_C10901g)	gene2860(YALI0_C23210g)
BP	GO:0006264	mitochondrial DNA replication	0	2	2	2	0.11058	0.903657	-	gene4852(YALI0_E17369g),gene6531(YALI0_F19404g)
BP	GO:0006308	DNA catabolic process	0	2	2	2	0.11058	0.903657	-	gene3131(YALI0_D05071g),gene6391(YALI0_F16335g)
BP	GO:0006382	adenosine to inosine editing	0	2	2	2	0.11058	0.903657	-	gene4699(YALI0_E13728g),gene5265(YALI0_E26543g)
BP	GO:0006390	transcription from mitochondrial promoter	0	2	2	2	0.11058	0.903657	-	gene468(YALI0_A12001g),gene928(YALI0_B01980g)
BP	GO:0006409	tRNA export from nucleus	0	2	2	2	0.11058	0.903657	-	gene4297(YALI0_E04576g),gene5499(YALI0_E31625g)
BP	GO:0006429	leucyl-tRNA aminoacylation	0	2	2	2	0.11058	0.903657	-	gene5180(YALI0_E24607g),gene5766(YALI0_F02299g)
BP	GO:0006431	methionyl-tRNA aminoacylation	0	2	2	2	0.11058	0.903657	-	gene3067(YALI0_D03619g),gene6981(YALI0_F29843g)
BP	GO:0006527	arginine catabolic process	2	0	2	2	0.11058	0.903657	gene2057(YALI0_C04433g),gene4425(YALI0_E07535g)	-
BP	GO:0006529	asparagine biosynthetic process	0	2	2	2	0.11058	0.903657	-	gene520(YALI0_A13387g),gene6919(YALI0_F28149g)
BP	GO:0006537	glutamate biosynthetic process	2	0	2	2	0.11058	0.903657	gene1706(YALI0_B19998g),gene6458(YALI0_F17820g)	-
BP	GO:0006538	glutamate catabolic process	1	1	2	2	0.11058	0.903657	gene4513(YALI0_E09603g)	gene6044(YALI0_F08415g)
BP	GO:0006542	glutamine biosynthetic process	2	0	2	2	0.11058	0.903657	gene3493(YALI0_D13024g),gene5685(YALI0_F00506g)	-
BP	GO:0006552	leucine catabolic process	2	0	2	2	0.11058	0.903657	gene1824(YALI0_B22550g),gene4651(YALI0_E12595g)	-
BP	GO:0006562	proline catabolic process	2	0	2	2	0.11058	0.903657	gene1244(YALI0_B09625g),gene1245(YALI0_B09647g)	-
BP	GO:0006863	purine nucleobase transport	1	1	2	2	0.11058	0.903657	gene5323(YALI0_E27852g)	gene4438(YALI0_E07920g)
BP	GO:0006876	cellular cadmium ion homeostasis	0	2	2	2	0.11058	0.903657	-	gene2397(YALI0_C12254g),gene6546(YALI0_F19734g)
BP	GO:0009448	gamma-aminobutyric acid metabolic process	2	0	2	2	0.11058	0.903657	gene4891(YALI0_E18238g),gene6831(YALI0_F26191g)	-
BP	GO:0009450	gamma-aminobutyric acid catabolic process	2	0	2	2	0.11058	0.903657	gene4891(YALI0_E18238g),gene6831(YALI0_F26191g)	-
BP	GO:0010133	proline catabolic process to glutamate	2	0	2	2	0.11058	0.903657	gene1244(YALI0_B09625g),gene1245(YALI0_B09647g)	-
BP	GO:0010230	alternative respiration	2	0	2	2	0.11058	0.903657	gene3352(YALI0_D09933g),gene4127(YALI0_E00814g)	-
BP	GO:0010817	regulation of hormone levels	1	1	2	2	0.11058	0.903657	gene3662(YALI0_D17182g)	gene4360(YALI0_E05973g)
BP	GO:0015847	putrescine transport	2	0	2	2	0.11058	0.903657	gene1019(YALI0_B04202g),gene2541(YALI0_C15807g)	-
BP	GO:0015848	spermidine transport	2	0	2	2	0.11058	0.903657	gene1019(YALI0_B04202g),gene2541(YALI0_C15807g)	-
BP	GO:0016553	base conversion or substitution editing	0	2	2	2	0.11058	0.903657	-	gene4699(YALI0_E13728g),gene5265(YALI0_E26543g)
BP	GO:0017003	protein-heme linkage	0	2	2	2	0.11058	0.903657	-	gene2424(YALI0_C12918g),gene4371(YALI0_E06215g)
BP	GO:0017006	protein-tetrapyrrole linkage	0	2	2	2	0.11058	0.903657	-	gene2424(YALI0_C12918g),gene4371(YALI0_E06215g)
BP	GO:0017198	N-terminal peptidyl-serine acetylation	1	1	2	2	0.11058	0.903657	gene916(YALI0_B01716g)	gene1084(YALI0_B05742g)
BP	GO:0018063	cytochrome c-heme linkage	0	2	2	2	0.11058	0.903657	-	gene2424(YALI0_C12918g),gene4371(YALI0_E06215g)
BP	GO:0019264	glycine biosynthetic process from serine	2	0	2	2	0.11058	0.903657	gene3886(YALI0_D22484g),gene4809(YALI0_E16346g)	-
BP	GO:0019918	peptidyl-arginine methylation, to symmetrical-dimethyl arginine	0	2	2	2	0.11058	0.903657	-	gene3487(YALI0_D12859g),gene6598(YALI0_F20878g)
BP	GO:0019988	charged-tRNA amino acid modification	0	2	2	2	0.11058	0.903657	-	gene5058(YALI0_E22000g),gene5973(YALI0_F06820g)
BP	GO:0030920	peptidyl-serine acetylation	1	1	2	2	0.11058	0.903657	gene916(YALI0_B01716g)	gene1084(YALI0_B05742g)
BP	GO:0031119	tRNA pseudouridine synthesis	0	2	2	2	0.11058	0.903657	-	gene2418(YALI0_C12749g),gene6477(YALI0_F18216g)
BP	GO:0033317	pantothenate biosynthetic process from valine	0	2	2	2	0.11058	0.903657	-	gene1096(YALI0_B06006g),gene6599(YALI0_F20900g)
BP	GO:0042906	xanthine transport	1	1	2	2	0.11058	0.903657	gene5323(YALI0_E27852g)	gene4438(YALI0_E07920g)
BP	GO:0043418	homocysteine catabolic process	2	0	2	2	0.11058	0.903657	gene5929(YALI0_F05940g),gene6465(YALI0_F17974g)	-
BP	GO:0045911	positive regulation of DNA recombination	0	2	2	2	0.11058	0.903657	-	gene3645(YALI0_D16841g),gene6592(YALI0_F20746g)
BP	GO:0046073	dTMP metabolic process	1	1	2	2	0.11058	0.903657	gene2339(YALI0_C10901g)	gene2860(YALI0_C23210g)
BP	GO:0046950	cellular ketone body metabolic process	2	0	2	2	0.11058	0.903657	gene1824(YALI0_B22550g),gene6848(YALI0_F26587g)	-
BP	GO:0048254	snoRNA localization	0	2	2	2	0.11058	0.903657	-	gene4593(YALI0_E11363g),gene6023(YALI0_F07953g)
BP	GO:0055073	cadmium ion homeostasis	0	2	2	2	0.11058	0.903657	-	gene2397(YALI0_C12254g),gene6546(YALI0_F19734g)
BP	GO:0070124	mitochondrial translational initiation	0	2	2	2	0.11058	0.903657	-	gene1482(YALI0_B14993g),gene1797(YALI0_B21978g)
BP	GO:0070125	mitochondrial translational elongation	0	2	2	2	0.11058	0.903657	-	gene3232(YALI0_D07326g),gene6751(YALI0_F24387g)
BP	GO:0070476	rRNA (guanine-N7)-methylation	0	2	2	2	0.11058	0.903657	-	gene5187(YALI0_E24761g),gene5958(YALI0_F06512g)
BP	GO:0070682	proteasome regulatory particle assembly	2	0	2	2	0.11058	0.903657	gene1037(YALI0_B04620g),gene4946(YALI0_E19470g)	-
BP	GO:0071031	nuclear mRNA surveillance of mRNA 3'-end processing	0	2	2	2	0.11058	0.903657	-	gene3151(YALI0_D05511g),gene5574(YALI0_E33121g)
BP	GO:0071049	nuclear retention of pre-mRNA with aberrant 3'-ends at the site of transcription	0	2	2	2	0.11058	0.903657	-	gene3151(YALI0_D05511g),gene5574(YALI0_E33121g)
BP	GO:0071431	tRNA-containing ribonucleoprotein complex export from nucleus	0	2	2	2	0.11058	0.903657	-	gene4297(YALI0_E04576g),gene5499(YALI0_E31625g)
BP	GO:0072321	chaperone-mediated protein transport	0	2	2	2	0.11058	0.903657	-	gene3214(YALI0_D06908g),gene3430(YALI0_D11572g)
BP	GO:0090293	nitrogen catabolite regulation of transcription	2	0	2	2	0.11058	0.903657	gene3035(YALI0_D02783g),gene5318(YALI0_E27742g)	-
BP	GO:0090294	nitrogen catabolite activation of transcription	2	0	2	2	0.11058	0.903657	gene3035(YALI0_D02783g),gene5318(YALI0_E27742g)	-
BP	GO:1902224	ketone body metabolic process	2	0	2	2	0.11058	0.903657	gene1824(YALI0_B22550g),gene6848(YALI0_F26587g)	-
BP	GO:1903711	spermidine transmembrane transport	2	0	2	2	0.11058	0.903657	gene1019(YALI0_B04202g),gene2541(YALI0_C15807g)	-
BP	GO:1904481	response to tetrahydrofolate	2	0	2	2	0.11058	0.903657	gene3886(YALI0_D22484g),gene4809(YALI0_E16346g)	-
BP	GO:1904482	cellular response to tetrahydrofolate	2	0	2	2	0.11058	0.903657	gene3886(YALI0_D22484g),gene4809(YALI0_E16346g)	-
MF	GO:0008238	exopeptidase activity	16	0	16	35	0.11132	0.903657	gene1064(YALI0_B05258g),gene1075(YALI0_B05522g),gene1689(YALI0_B19580g),gene1901(YALI0_C00803g),gene2321(YALI0_C10494g),gene2787(YALI0_C21604g),gene2881(YALI0_C23661g),gene3266(YALI0_D08052g),gene3921(YALI0_D23309g),gene4687(YALI0_E13464g),gene4708(YALI0_E13970g),gene5855(YALI0_F04290g),gene6398(YALI0_F16489g),gene6792(YALI0_F25333g),gene6911(YALI0_F27973g),gene903(YALI0_B01408g)	-
MF	GO:0003959	NADPH dehydrogenase activity	3	1	4	6	0.11163	0.903657	gene1112(YALI0_B06413g),gene2971(YALI0_D01243g),gene3619(YALI0_D16247g)	gene6718(YALI0_F23661g)
MF	GO:0004312	fatty acid synthase activity	0	4	4	6	0.11163	0.903657	-	gene1485(YALI0_B15059g),gene1682(YALI0_B19382g),gene5970(YALI0_F06754g),gene7021(YALI0_F30679g)
MF	GO:0015205	nucleobase transmembrane transporter activity	3	1	4	6	0.11163	0.903657	gene3773(YALI0_D19756g),gene5323(YALI0_E27852g),gene7016(YALI0_F30569g)	gene4438(YALI0_E07920g)
MF	GO:0016742	hydroxymethyl-, formyl- and related transferase activity	3	1	4	6	0.11163	0.903657	gene1661(YALI0_B18898g),gene3886(YALI0_D22484g),gene4809(YALI0_E16346g)	gene5973(YALI0_F06820g)
MF	GO:0016846	carbon-sulfur lyase activity	2	2	4	6	0.11163	0.903657	gene2942(YALI0_D00605g),gene5926(YALI0_F05874g)	gene2424(YALI0_C12918g),gene4371(YALI0_E06215g)
MF	GO:0070181	small ribosomal subunit rRNA binding	0	4	4	6	0.11163	0.903657	-	gene4100(YALI0_E00220g),gene4715(YALI0_E14124g),gene5439(YALI0_E30371g),gene6851(YALI0_F26653g)
MF	GO:0016705	oxidoreductase activity, acting on paired donors, with incorporation or reduction of molecular oxygen	13	13	26	61	0.1135	0.903657	gene1428(YALI0_B13838g),gene1792(YALI0_B21824g),gene2302(YALI0_C10054g),gene2324(YALI0_C10604g),gene292(YALI0_A07425g),gene3829(YALI0_D21098g),gene4683(YALI0_E13343g),gene4967(YALI0_E19943g),gene5125(YALI0_E23474g),gene5238(YALI0_E25982g),gene6684(YALI0_F22825g),gene6867(YALI0_F26983g),gene845(YALI0_A21439g)	gene1059(YALI0_B05126g),gene1289(YALI0_B10604g),gene1427(YALI0_B13816g),gene1757(YALI0_B21098g),gene356(YALI0_A09042g),gene3612(YALI0_D15928g),gene3687(YALI0_D17754g),gene4450(YALI0_E08162g),gene4763(YALI0_E15224g),gene5826(YALI0_F03663g),gene6166(YALI0_F11297g),gene6917(YALI0_F28105g),gene923(YALI0_B01848g)
MF	GO:0001032	RNA polymerase III type 3 promoter DNA binding	1	1	2	2	0.11879	0.903657	gene6135(YALI0_F10541g)	gene5153(YALI0_E24035g)
MF	GO:0003826	alpha-ketoacid dehydrogenase activity	2	0	2	2	0.11879	0.903657	gene3295(YALI0_D08690g),gene5886(YALI0_F05038g)	-
MF	GO:0003878	ATP citrate synthase activity	0	2	2	2	0.11879	0.903657	-	gene3972(YALI0_D24431g),gene5650(YALI0_E34793g)
MF	GO:0003995	acyl-CoA dehydrogenase activity	2	0	2	2	0.11879	0.903657	gene3603(YALI0_D15708g),gene4650(YALI0_E12573g)	-
MF	GO:0004066	asparagine synthase (glutamine-hydrolyzing) activity	0	2	2	2	0.11879	0.903657	-	gene520(YALI0_A13387g),gene6919(YALI0_F28149g)
MF	GO:0004070	aspartate carbamoyltransferase activity	0	2	2	2	0.11879	0.903657	-	gene2895(YALI0_C23969g),gene4509(YALI0_E09493g)
MF	GO:0004088	carbamoyl-phosphate synthase (glutamine-hydrolyzing) activity	0	2	2	2	0.11879	0.903657	-	gene3234(YALI0_D07370g),gene4509(YALI0_E09493g)
MF	GO:0004123	cystathionine gamma-lyase activity	2	0	2	2	0.11879	0.903657	gene2942(YALI0_D00605g),gene5926(YALI0_F05874g)	-
MF	GO:0004315	3-oxoacyl-[acyl-carrier-protein] synthase activity	0	2	2	2	0.11879	0.903657	-	gene1682(YALI0_B19382g),gene7021(YALI0_F30679g)
MF	GO:0004321	fatty-acyl-CoA synthase activity	0	2	2	2	0.11879	0.903657	-	gene1485(YALI0_B15059g),gene1682(YALI0_B19382g)
MF	GO:0004353	glutamate dehydrogenase [NAD(P)+] activity	2	0	2	2	0.11879	0.903657	gene4513(YALI0_E09603g),gene6458(YALI0_F17820g)	-
MF	GO:0004356	glutamate-ammonia ligase activity	2	0	2	2	0.11879	0.903657	gene3493(YALI0_D13024g),gene5685(YALI0_F00506g)	-
MF	GO:0004372	glycine hydroxymethyltransferase activity	2	0	2	2	0.11879	0.903657	gene3886(YALI0_D22484g),gene4809(YALI0_E16346g)	-
MF	GO:0004408	holocytochrome-c synthase activity	0	2	2	2	0.11879	0.903657	-	gene2424(YALI0_C12918g),gene4371(YALI0_E06215g)
MF	GO:0004474	malate synthase activity	2	0	2	2	0.11879	0.903657	gene3747(YALI0_D19140g),gene4783(YALI0_E15708g)	-
MF	GO:0004809	tRNA (guanine-N2-)-methyltransferase activity	0	2	2	2	0.11879	0.903657	-	gene2460(YALI0_C13882g),gene5456(YALI0_E30723g)
MF	GO:0004823	leucine-tRNA ligase activity	0	2	2	2	0.11879	0.903657	-	gene5180(YALI0_E24607g),gene5766(YALI0_F02299g)
MF	GO:0004825	methionine-tRNA ligase activity	0	2	2	2	0.11879	0.903657	-	gene3067(YALI0_D03619g),gene6981(YALI0_F29843g)
MF	GO:0005047	signal recognition particle binding	1	1	2	2	0.11879	0.903657	gene6706(YALI0_F23375g)	gene2670(YALI0_C18997g)
MF	GO:0005345	purine nucleobase transmembrane transporter activity	1	1	2	2	0.11879	0.903657	gene5323(YALI0_E27852g)	gene4438(YALI0_E07920g)
MF	GO:0005388	calcium-transporting ATPase activity	2	0	2	2	0.11879	0.903657	gene3121(YALI0_D04873g),gene4508(YALI0_E09471g)	-
MF	GO:0008425	2-polyprenyl-6-methoxy-1,4-benzoquinone methyltransferase activity	0	2	2	2	0.11879	0.903657	-	gene1522(YALI0_B15884g),gene2636(YALI0_C18205g)
MF	GO:0008479	queuine tRNA-ribosyltransferase activity	0	2	2	2	0.11879	0.903657	-	gene1633(YALI0_B18304g),gene6065(YALI0_F08921g)
MF	GO:0008793	aromatic-amino-acid:2-oxoglutarate aminotransferase activity	2	0	2	2	0.11879	0.903657	gene2088(YALI0_C05258g),gene5013(YALI0_E20977g)	-
MF	GO:0009019	tRNA (guanine-N1-)-methyltransferase activity	0	2	2	2	0.11879	0.903657	-	gene3150(YALI0_D05489g),gene6232(YALI0_F12771g)
MF	GO:0009916	alternative oxidase activity	2	0	2	2	0.11879	0.903657	gene3352(YALI0_D09933g),gene4127(YALI0_E00814g)	-
MF	GO:0015093	ferrous iron transmembrane transporter activity	0	2	2	2	0.11879	0.903657	-	gene2397(YALI0_C12254g),gene6546(YALI0_F19734g)
MF	GO:0015341	zinc efflux active transmembrane transporter activity	0	2	2	2	0.11879	0.903657	-	gene2397(YALI0_C12254g),gene6546(YALI0_F19734g)
MF	GO:0015489	putrescine transmembrane transporter activity	2	0	2	2	0.11879	0.903657	gene1019(YALI0_B04202g),gene2541(YALI0_C15807g)	-
MF	GO:0015606	spermidine transmembrane transporter activity	2	0	2	2	0.11879	0.903657	gene1019(YALI0_B04202g),gene2541(YALI0_C15807g)	-
MF	GO:0016211	ammonia ligase activity	2	0	2	2	0.11879	0.903657	gene3493(YALI0_D13024g),gene5685(YALI0_F00506g)	-
MF	GO:0016421	CoA carboxylase activity	1	1	2	2	0.11879	0.903657	gene4651(YALI0_E12595g)	gene2360(YALI0_C11407g)
MF	GO:0016426	tRNA (adenine) methyltransferase activity	0	2	2	2	0.11879	0.903657	-	gene1288(YALI0_B10582g),gene6680(YALI0_F22737g)
MF	GO:0016429	tRNA (adenine-N1-)-methyltransferase activity	0	2	2	2	0.11879	0.903657	-	gene1288(YALI0_B10582g),gene6680(YALI0_F22737g)
MF	GO:0016682	oxidoreductase activity, acting on diphenols and related substances as donors, oxygen as acceptor	2	0	2	2	0.11879	0.903657	gene3352(YALI0_D09933g),gene4127(YALI0_E00814g)	-
MF	GO:0016880	acid-ammonia (or amide) ligase activity	2	0	2	2	0.11879	0.903657	gene3493(YALI0_D13024g),gene5685(YALI0_F00506g)	-
MF	GO:0019171	3-hydroxyacyl-[acyl-carrier-protein] dehydratase activity	1	1	2	2	0.11879	0.903657	gene748(YALI0_A19096g)	gene1485(YALI0_B15059g)
MF	GO:0022883	zinc efflux transmembrane transporter activity	0	2	2	2	0.11879	0.903657	-	gene2397(YALI0_C12254g),gene6546(YALI0_F19734g)
MF	GO:0030580	quinone cofactor methyltransferase activity	0	2	2	2	0.11879	0.903657	-	gene1522(YALI0_B15884g),gene2636(YALI0_C18205g)
MF	GO:0032977	membrane insertase activity	0	2	2	2	0.11879	0.903657	-	gene6259(YALI0_F13387g),gene7079(YALI0_F32021g)
MF	GO:0034648	histone demethylase activity (H3-dimethyl-K4 specific)	2	0	2	2	0.11879	0.903657	gene1865(YALI0_B23430g),gene4077(YALI0_D26972g)	-
MF	GO:0035243	protein-arginine omega-N symmetric methyltransferase activity	0	2	2	2	0.11879	0.903657	-	gene3487(YALI0_D12859g),gene6598(YALI0_F20878g)
MF	GO:0042907	xanthine transmembrane transporter activity	1	1	2	2	0.11879	0.903657	gene5323(YALI0_E27852g)	gene4438(YALI0_E07920g)
MF	GO:0046583	cation efflux transmembrane transporter activity	0	2	2	2	0.11879	0.903657	-	gene2397(YALI0_C12254g),gene6546(YALI0_F19734g)
MF	GO:0051538	3 iron, 4 sulfur cluster binding	1	1	2	2	0.11879	0.903657	gene1706(YALI0_B19998g)	gene3926(YALI0_D23397g)
MF	GO:0052717	tRNA-specific adenosine-34 deaminase activity	0	2	2	2	0.11879	0.903657	-	gene4699(YALI0_E13728g),gene5265(YALI0_E26543g)
MF	GO:0070905	serine binding	2	0	2	2	0.11879	0.903657	gene3886(YALI0_D22484g),gene4809(YALI0_E16346g)	-
MF	GO:0016712	oxidoreductase activity, acting on paired donors, with incorporation or reduction of molecular oxygen, reduced flavin or flavoprotein as one donor, and incorporation of one atom of oxygen	4	3	7	13	0.12054	0.903657	gene1428(YALI0_B13838g),gene2302(YALI0_C10054g),gene5125(YALI0_E23474g),gene5238(YALI0_E25982g)	gene1427(YALI0_B13816g),gene356(YALI0_A09042g),gene923(YALI0_B01848g)
BP	GO:0001522	pseudouridine synthesis	0	6	6	11	0.1207	0.903657	-	gene1271(YALI0_B10219g),gene2418(YALI0_C12749g),gene2987(YALI0_D01628g),gene4003(YALI0_D25234g),gene6208(YALI0_F12199g),gene6477(YALI0_F18216g)
BP	GO:0006144	purine nucleobase metabolic process	6	0	6	11	0.1207	0.903657	gene1353(YALI0_B12078g),gene4138(YALI0_E01056g),gene5227(YALI0_E25740g),gene6079(YALI0_F09251g),gene6604(YALI0_F21010g),gene6674(YALI0_F22605g)	-
BP	GO:0019748	secondary metabolic process	6	0	6	11	0.1207	0.903657	gene1071(YALI0_B05434g),gene1901(YALI0_C00803g),gene2787(YALI0_C21604g),gene2881(YALI0_C23661g),gene3266(YALI0_D08052g),gene903(YALI0_B01408g)	-
BP	GO:0031365	N-terminal protein amino acid modification	2	4	6	11	0.1207	0.903657	gene869(YALI0_B00638g),gene916(YALI0_B01716g)	gene1084(YALI0_B05742g),gene2366(YALI0_C11539g),gene6051(YALI0_F08591g),gene6209(YALI0_F12221g)
BP	GO:0044550	secondary metabolite biosynthetic process	6	0	6	11	0.1207	0.903657	gene1071(YALI0_B05434g),gene1901(YALI0_C00803g),gene2787(YALI0_C21604g),gene2881(YALI0_C23661g),gene3266(YALI0_D08052g),gene903(YALI0_B01408g)	-
MF	GO:0004028	3-chloroallyl aldehyde dehydrogenase activity	2	1	3	4	0.12141	0.903657	gene693(YALI0_A17875g),gene898(YALI0_B01298g)	gene4771(YALI0_E15400g)
MF	GO:0004525	ribonuclease III activity	0	3	3	4	0.12141	0.903657	-	gene3706(YALI0_D18150g),gene4390(YALI0_E06677g),gene5969(YALI0_F06732g)
MF	GO:0015086	cadmium ion transmembrane transporter activity	1	2	3	4	0.12141	0.903657	gene4070(YALI0_D26818g)	gene2397(YALI0_C12254g),gene6546(YALI0_F19734g)
MF	GO:0015116	sulfate transmembrane transporter activity	2	1	3	4	0.12141	0.903657	gene1616(YALI0_B17930g),gene984(YALI0_B03344g)	gene6690(YALI0_F23023g)
MF	GO:0015204	urea transmembrane transporter activity	3	0	3	4	0.12141	0.903657	gene1019(YALI0_B04202g),gene2541(YALI0_C15807g),gene5358(YALI0_E28622g)	-
MF	GO:0016433	rRNA (adenine) methyltransferase activity	0	3	3	4	0.12141	0.903657	-	gene4125(YALI0_E00770g),gene6449(YALI0_F17622g),gene6993(YALI0_F30085g)
MF	GO:0032296	double-stranded RNA-specific ribonuclease activity	0	3	3	4	0.12141	0.903657	-	gene3706(YALI0_D18150g),gene4390(YALI0_E06677g),gene5969(YALI0_F06732g)
MF	GO:0051185	coenzyme transporter activity	1	2	3	4	0.12141	0.903657	gene5284(YALI0_E26983g)	gene2680(YALI0_C19195g),gene5975(YALI0_F06842g)
MF	GO:0051731	polynucleotide 5'-hydroxyl-kinase activity	1	2	3	4	0.12141	0.903657	gene3569(YALI0_D14916g)	gene4805(YALI0_E16258g),gene5379(YALI0_E29051g)
CC	GO:0016021	integral component of membrane	263	160	423	1223	0.12191	0.903657	gene0(YALI0_A00110g),gene1019(YALI0_B04202g),gene1064(YALI0_B05258g),gene1071(YALI0_B05434g),gene1111(YALI0_B06391g),gene1139(YALI0_B07051g),gene1163(YALI0_B07601g),gene1194(YALI0_B08448g),gene1204(YALI0_B08712g),gene1240(YALI0_B09537g),gene1296(YALI0_B10780g),gene1358(YALI0_B12188g),gene1392(YALI0_B12980g),gene14(YALI0_A00418g),gene1505(YALI0_B15488g),gene1551(YALI0_B16522g),gene1566(YALI0_B1685…	gene1059(YALI0_B05126g),gene1062(YALI0_B05214g),gene1123(YALI0_B06710g),gene1212(YALI0_B08899g),gene1228(YALI0_B09251g),gene1252(YALI0_B09812g),gene1268(YALI0_B10153g),gene1294(YALI0_B10736g),gene1305(YALI0_B10978g),gene1391(YALI0_B12958g),gene1426(YALI0_B13794g),gene1530(YALI0_B16060g),gene1538(YALI0_B16236g),gene1609(YALI0_B17776g),gene1642(YALI0_B18502g),gene1709(YALI0_B20064g),gene1727(YALI0_…
BP	GO:0000154	rRNA modification	0	10	10	21	0.1227	0.903657	-	gene1470(YALI0_B14751g),gene3341(YALI0_D09691g),gene4125(YALI0_E00770g),gene4159(YALI0_E01496g),gene5187(YALI0_E24761g),gene5516(YALI0_E31933g),gene5958(YALI0_F06512g),gene6208(YALI0_F12199g),gene6449(YALI0_F17622g),gene6993(YALI0_F30085g)
BP	GO:0006835	dicarboxylic acid transport	4	4	8	16	0.12473	0.903657	gene2390(YALI0_C12100g),gene6203(YALI0_F12089g),gene7072(YALI0_F31845g),gene984(YALI0_B03344g)	gene1294(YALI0_B10736g),gene2629(YALI0_C18051g),gene5986(YALI0_F07106g),gene652(YALI0_A16863g)
MF	GO:0016903	oxidoreductase activity, acting on the aldehyde or oxo group of donors	11	4	15	33	0.12626	0.903657	gene1245(YALI0_B09647g),gene1822(YALI0_B22506g),gene1945(YALI0_C01859g),gene3262(YALI0_D07942g),gene3295(YALI0_D08690g),gene4722(YALI0_E14256g),gene5862(YALI0_F04444g),gene6831(YALI0_F26191g),gene693(YALI0_A17875g),gene762(YALI0_A19448g),gene898(YALI0_B01298g)	gene1704(YALI0_B19976g),gene2214(YALI0_C08074g),gene4771(YALI0_E15400g),gene6945(YALI0_F28765g)
CC	GO:0005576	extracellular region	23	7	30	75	0.12949	0.903657	gene1080(YALI0_B05654g),gene1550(YALI0_B16500g),gene2227(YALI0_C08393g),gene2306(YALI0_C10135g),gene2501(YALI0_C14938g),gene2730(YALI0_C20273g),gene3061(YALI0_D03465g),gene3882(YALI0_D22396g),gene4540(YALI0_E10175g),gene4797(YALI0_E16060g),gene5007(YALI0_E20845g),gene5019(YALI0_E21109g),gene5370(YALI0_E28875g),gene5585(YALI0_E33363g),gene5622(YALI0_E34155g),gene5865(YALI0_F04532g),gene5903(YALI0_…	gene1526(YALI0_B15972g),gene1679(YALI0_B19316g),gene1730(YALI0_B20526g),gene3044(YALI0_D02981g),gene4816(YALI0_E16533g),gene5630(YALI0_E34331g),gene6224(YALI0_F12595g)
MF	GO:0043168	anion binding	135	133	268	738	0.1321	0.903657	gene1013(YALI0_B04070g),gene1112(YALI0_B06413g),gene1138(YALI0_B07029g),gene1199(YALI0_B08558g),gene1243(YALI0_B09603g),gene1244(YALI0_B09625g),gene1358(YALI0_B12188g),gene1392(YALI0_B12980g),gene1464(YALI0_B14619g),gene1518(YALI0_B15774g),gene1523(YALI0_B15906g),gene1537(YALI0_B16214g),gene1599(YALI0_B17556g),gene1681(YALI0_B19360g),gene1706(YALI0_B19998g),gene172(YALI0_A04367g),gene1743(YALI0_B…	gene1092(YALI0_B05918g),gene1270(YALI0_B10197g),gene1309(YALI0_B11066g),gene1349(YALI0_B11968g),gene1420(YALI0_B13662g),gene1436(YALI0_B14014g),gene1470(YALI0_B14751g),gene1568(YALI0_B16896g),gene1646(YALI0_B18590g),gene1647(YALI0_B18612g),gene1757(YALI0_B21098g),gene1776(YALI0_B21516g),gene1778(YALI0_B21538g),gene1797(YALI0_B21978g),gene1825(YALI0_B22572g),gene1828(YALI0_B22638g),gene1876(YALI0_…
BP	GO:0015718	monocarboxylic acid transport	6	5	11	24	0.13766	0.903657	gene1685(YALI0_B19470g),gene2584(YALI0_C16907g),gene2865(YALI0_C23298g),gene4795(YALI0_E16016g),gene5565(YALI0_E32901g),gene6395(YALI0_F16423g)	gene2293(YALI0_C09823g),gene2530(YALI0_C15488g),gene2777(YALI0_C21406g),gene3788(YALI0_D20108g),gene5975(YALI0_F06842g)
MF	GO:0016894	endonuclease activity, active with either ribo- or deoxyribonucleic acids and producing 3'-phosphomonoesters	3	3	6	11	0.13965	0.903657	gene3794(YALI0_D20240g),gene5602(YALI0_E33715g),gene6814(YALI0_F25839g)	gene5357(YALI0_E28600g),gene6391(YALI0_F16335g),gene714(YALI0_A18293g)
MF	GO:1901681	sulfur compound binding	3	3	6	11	0.13965	0.903657	gene3215(YALI0_D06930g),gene3945(YALI0_D23815g),gene5029(YALI0_E21351g)	gene1876(YALI0_C00253g),gene3362(YALI0_D10131g),gene5111(YALI0_E23185g)
CC	GO:0031224	intrinsic component of membrane	264	160	424	1230	0.14283	0.903657	gene0(YALI0_A00110g),gene1019(YALI0_B04202g),gene1064(YALI0_B05258g),gene1071(YALI0_B05434g),gene1111(YALI0_B06391g),gene1139(YALI0_B07051g),gene1163(YALI0_B07601g),gene1194(YALI0_B08448g),gene1204(YALI0_B08712g),gene1240(YALI0_B09537g),gene1296(YALI0_B10780g),gene1358(YALI0_B12188g),gene1392(YALI0_B12980g),gene14(YALI0_A00418g),gene1505(YALI0_B15488g),gene1551(YALI0_B16522g),gene1566(YALI0_B1685…	gene1059(YALI0_B05126g),gene1062(YALI0_B05214g),gene1123(YALI0_B06710g),gene1212(YALI0_B08899g),gene1228(YALI0_B09251g),gene1252(YALI0_B09812g),gene1268(YALI0_B10153g),gene1294(YALI0_B10736g),gene1305(YALI0_B10978g),gene1391(YALI0_B12958g),gene1426(YALI0_B13794g),gene1530(YALI0_B16060g),gene1538(YALI0_B16236g),gene1609(YALI0_B17776g),gene1642(YALI0_B18502g),gene1709(YALI0_B20064g),gene1727(YALI0_…
BP	GO:0048878	chemical homeostasis	18	15	33	84	0.14326	0.903657	gene1613(YALI0_B17864g),gene1813(YALI0_B22308g),gene1905(YALI0_C00891g),gene2141(YALI0_C06424g),gene2890(YALI0_C23859g),gene2929(YALI0_D00319g),gene3121(YALI0_D04873g),gene3984(YALI0_D24750g),gene4070(YALI0_D26818g),gene4105(YALI0_E00330g),gene4189(YALI0_E02156g),gene4385(YALI0_E06567g),gene4508(YALI0_E09471g),gene4773(YALI0_E15488g),gene4979(YALI0_E20207g),gene5313(YALI0_E27654g),gene5655(YALI0_…	gene2397(YALI0_C12254g),gene2731(YALI0_C20295g),gene3207(YALI0_D06754g),gene3691(YALI0_D17842g),gene3919(YALI0_D23265g),gene4866(YALI0_E17677g),gene5352(YALI0_E28512g),gene5662(YALI0_E35112g),gene5794(YALI0_F02959g),gene5983(YALI0_F07040g),gene6139(YALI0_F10615g),gene6191(YALI0_F11825g),gene6546(YALI0_F19734g),gene6746(YALI0_F24277g),gene6747(YALI0_F24299g)
BP	GO:0006862	nucleotide transport	1	4	5	9	0.14349	0.903657	gene6545(YALI0_F19712g)	gene2483(YALI0_C14498g),gene422(YALI0_A10659g),gene5908(YALI0_F05500g),gene652(YALI0_A16863g)
BP	GO:0009071	serine family amino acid catabolic process	5	0	5	9	0.14349	0.903657	gene1537(YALI0_B16214g),gene3886(YALI0_D22484g),gene389(YALI0_A09856g),gene4809(YALI0_E16346g),gene5789(YALI0_F02849g)	-
BP	GO:0046349	amino sugar biosynthetic process	5	0	5	9	0.14349	0.903657	gene1772(YALI0_B21428g),gene1927(YALI0_C01419g),gene3052(YALI0_D03179g),gene3790(YALI0_D20152g),gene4033(YALI0_D25938g)	-
BP	GO:0046937	phytochelatin metabolic process	5	0	5	9	0.14349	0.903657	gene1901(YALI0_C00803g),gene2787(YALI0_C21604g),gene2881(YALI0_C23661g),gene3266(YALI0_D08052g),gene903(YALI0_B01408g)	-
BP	GO:0046938	phytochelatin biosynthetic process	5	0	5	9	0.14349	0.903657	gene1901(YALI0_C00803g),gene2787(YALI0_C21604g),gene2881(YALI0_C23661g),gene3266(YALI0_D08052g),gene903(YALI0_B01408g)	-
BP	GO:0042440	pigment metabolic process	4	5	9	19	0.14404	0.903657	gene1353(YALI0_B12078g),gene4138(YALI0_E01056g),gene6534(YALI0_F19470g),gene6604(YALI0_F21010g)	gene5421(YALI0_E29975g),gene6594(YALI0_F20790g),gene6721(YALI0_F23727g),gene6762(YALI0_F24651g),gene6849(YALI0_F26609g)
BP	GO:0072528	pyrimidine-containing compound biosynthetic process	2	7	9	19	0.14404	0.903657	gene2339(YALI0_C10901g),gene5029(YALI0_E21351g)	gene2532(YALI0_C15554g),gene2860(YALI0_C23210g),gene2895(YALI0_C23969g),gene3234(YALI0_D07370g),gene384(YALI0_A09768g),gene4281(YALI0_E04224g),gene4509(YALI0_E09493g)
MF	GO:0072509	divalent inorganic cation transmembrane transporter activity	7	5	12	26	0.14712	0.903657	gene2929(YALI0_D00319g),gene3121(YALI0_D04873g),gene3324(YALI0_D09317g),gene4070(YALI0_D26818g),gene4124(YALI0_E00748g),gene4508(YALI0_E09471g),gene5162(YALI0_E24211g)	gene2397(YALI0_C12254g),gene2949(YALI0_D00759g),gene6508(YALI0_F18854g),gene6546(YALI0_F19734g),gene6632(YALI0_F21659g)
BP	GO:1901566	organonitrogen compound biosynthetic process	62	154	216	614	0.14769	0.903657	gene1215(YALI0_B08965g),gene1353(YALI0_B12078g),gene1635(YALI0_B18348g),gene1661(YALI0_B18898g),gene1681(YALI0_B19360g),gene1706(YALI0_B19998g),gene1772(YALI0_B21428g),gene1901(YALI0_C00803g),gene1930(YALI0_C01485g),gene2057(YALI0_C04433g),gene2088(YALI0_C05258g),gene2324(YALI0_C10604g),gene2339(YALI0_C10901g),gene2551(YALI0_C16049g),gene2591(YALI0_C17061g),gene2697(YALI0_C19580g),gene2723(YALI0_…	gene1092(YALI0_B05918g),gene1096(YALI0_B06006g),gene1101(YALI0_B06116g),gene1118(YALI0_B06578g),gene114(YALI0_A02849g),gene121(YALI0_A03003g),gene1284(YALI0_B10494g),gene1306(YALI0_B11000g),gene1482(YALI0_B14993g),gene1515(YALI0_B15708g),gene1607(YALI0_B17732g),gene1707(YALI0_B20020g),gene1757(YALI0_B21098g),gene1797(YALI0_B21978g),gene1826(YALI0_B22594g),gene1876(YALI0_C00253g),gene1883(YALI0_C0…
MF	GO:0001056	RNA polymerase III activity	0	8	8	16	0.14809	0.903657	-	gene1048(YALI0_B04851g),gene3193(YALI0_D06457g),gene3761(YALI0_D19448g),gene3809(YALI0_D20592g),gene5149(YALI0_E23947g),gene5808(YALI0_F03300g),gene6053(YALI0_F08635g),gene6081(YALI0_F09295g)
MF	GO:0016709	oxidoreductase activity, acting on paired donors, with incorporation or reduction of molecular oxygen, NAD(P)H as one donor, and incorporation of one atom of oxygen	2	6	8	16	0.14809	0.903657	gene292(YALI0_A07425g),gene6867(YALI0_F26983g)	gene1059(YALI0_B05126g),gene356(YALI0_A09042g),gene3687(YALI0_D17754g),gene4450(YALI0_E08162g),gene4763(YALI0_E15224g),gene6166(YALI0_F11297g)
MF	GO:0016763	transferase activity, transferring pentosyl groups	3	5	8	16	0.14809	0.903657	gene2591(YALI0_C17061g),gene6995(YALI0_F30129g),gene852(YALI0_B00220g)	gene1633(YALI0_B18304g),gene2085(YALI0_C05170g),gene384(YALI0_A09768g),gene5058(YALI0_E22000g),gene6065(YALI0_F08921g)
MF	GO:0004519	endonuclease activity	7	21	28	68	0.14846	0.903657	gene1775(YALI0_B21494g),gene2884(YALI0_C23727g),gene3794(YALI0_D20240g),gene494(YALI0_A12705g),gene5602(YALI0_E33715g),gene6814(YALI0_F25839g),gene6846(YALI0_F26543g)	gene1043(YALI0_B04752g),gene2029(YALI0_C03784g),gene218(YALI0_A05555g),gene253(YALI0_A06523g),gene3131(YALI0_D05071g),gene3706(YALI0_D18150g),gene3727(YALI0_D18700g),gene4390(YALI0_E06677g),gene493(YALI0_A12683g),gene5087(YALI0_E22671g),gene5267(YALI0_E26587g),gene5357(YALI0_E28600g),gene5377(YALI0_E29007g),gene579(YALI0_A15059g),gene5797(YALI0_F03025g),gene5969(YALI0_F06732g),gene6369(YALI0_F158…
MF	GO:0015297	antiporter activity	8	2	10	21	0.14925	0.903657	gene1204(YALI0_B08712g),gene1616(YALI0_B17930g),gene2195(YALI0_C07590g),gene2718(YALI0_C20053g),gene4066(YALI0_D26730g),gene4189(YALI0_E02156g),gene6545(YALI0_F19712g),gene984(YALI0_B03344g)	gene422(YALI0_A10659g),gene4487(YALI0_E09015g)
MF	GO:0004497	monooxygenase activity	8	9	17	39	0.15067	0.903657	gene1428(YALI0_B13838g),gene1792(YALI0_B21824g),gene2302(YALI0_C10054g),gene292(YALI0_A07425g),gene4967(YALI0_E19943g),gene5125(YALI0_E23474g),gene5238(YALI0_E25982g),gene6867(YALI0_F26983g)	gene1059(YALI0_B05126g),gene1289(YALI0_B10604g),gene1427(YALI0_B13816g),gene356(YALI0_A09042g),gene3687(YALI0_D17754g),gene4450(YALI0_E08162g),gene4763(YALI0_E15224g),gene6166(YALI0_F11297g),gene923(YALI0_B01848g)
CC	GO:0015935	small ribosomal subunit	1	21	22	54	0.15082	0.903657	gene6794(YALI0_F25399g)	gene1101(YALI0_B06116g),gene121(YALI0_A03003g),gene1284(YALI0_B10494g),gene1482(YALI0_B14993g),gene1826(YALI0_B22594g),gene2207(YALI0_C07887g),gene2451(YALI0_C13706g),gene2994(YALI0_D01804g),gene3078(YALI0_D03916g),gene3283(YALI0_D08448g),gene3284(YALI0_D08470g),gene3649(YALI0_D16929g),gene3851(YALI0_D21626g),gene4100(YALI0_E00220g),gene4517(YALI0_E09691g),gene4715(YALI0_E14124g),gene526(YALI0_A1…
BP	GO:0051188	cofactor biosynthetic process	8	27	35	90	0.151	0.903657	gene1661(YALI0_B18898g),gene2697(YALI0_C19580g),gene4138(YALI0_E01056g),gene4199(YALI0_E02354g),gene4996(YALI0_E20603g),gene5029(YALI0_E21351g),gene6534(YALI0_F19470g),gene852(YALI0_B00220g)	gene1096(YALI0_B06006g),gene1513(YALI0_B15664g),gene1522(YALI0_B15884g),gene1646(YALI0_B18590g),gene2636(YALI0_C18205g),gene2661(YALI0_C18755g),gene3544(YALI0_D14322g),gene356(YALI0_A09042g),gene3605(YALI0_D15774g),gene3645(YALI0_D16841g),gene396(YALI0_A10032g),gene3972(YALI0_D24431g),gene4262(YALI0_E03806g),gene4763(YALI0_E15224g),gene5151(YALI0_E23991g),gene5319(YALI0_E27764g),gene5421(YALI0_E2…
BP	GO:0006383	transcription from RNA polymerase III promoter	1	11	12	27	0.15102	0.903657	gene6135(YALI0_F10541g)	gene1048(YALI0_B04851g),gene3193(YALI0_D06457g),gene3254(YALI0_D07788g),gene3761(YALI0_D19448g),gene3809(YALI0_D20592g),gene4942(YALI0_E19382g),gene5149(YALI0_E23947g),gene5153(YALI0_E24035g),gene5808(YALI0_F03300g),gene6053(YALI0_F08635g),gene6081(YALI0_F09295g)
MF	GO:0015075	ion transmembrane transporter activity	56	31	87	230	0.1518	0.903657	gene1019(YALI0_B04202g),gene1111(YALI0_B06391g),gene1240(YALI0_B09537g),gene1551(YALI0_B16522g),gene1613(YALI0_B17864g),gene1616(YALI0_B17930g),gene1680(YALI0_B19338g),gene1685(YALI0_B19470g),gene2141(YALI0_C06424g),gene2195(YALI0_C07590g),gene2314(YALI0_C10311g),gene2390(YALI0_C12100g),gene2541(YALI0_C15807g),gene2584(YALI0_C16907g),gene2598(YALI0_C17237g),gene2718(YALI0_C20053g),gene2865(YALI0_…	gene1294(YALI0_B10736g),gene1426(YALI0_B13794g),gene1530(YALI0_B16060g),gene1709(YALI0_B20064g),gene1781(YALI0_B21604g),gene2293(YALI0_C09823g),gene2397(YALI0_C12254g),gene2530(YALI0_C15488g),gene2629(YALI0_C18051g),gene2731(YALI0_C20295g),gene2777(YALI0_C21406g),gene2949(YALI0_D00759g),gene3207(YALI0_D06754g),gene3788(YALI0_D20108g),gene422(YALI0_A10659g),gene4237(YALI0_E03234g),gene4487(YALI0_E…
CC	GO:0031967	organelle envelope	13	81	94	259	0.15576	0.903657	gene1215(YALI0_B08965g),gene2497(YALI0_C14806g),gene2888(YALI0_C23815g),gene3569(YALI0_D14916g),gene4127(YALI0_E00814g),gene4958(YALI0_E19745g),gene5243(YALI0_E26081g),gene5655(YALI0_E34881g),gene6010(YALI0_F07667g),gene6545(YALI0_F19712g),gene6603(YALI0_F20988g),gene6753(YALI0_F24431g),gene6901(YALI0_F27753g)	gene1274(YALI0_B10274g),gene1305(YALI0_B10978g),gene1391(YALI0_B12958g),gene1402(YALI0_B13222g),gene1513(YALI0_B15664g),gene1522(YALI0_B15884g),gene1530(YALI0_B16060g),gene1646(YALI0_B18590g),gene1692(YALI0_B19646g),gene204(YALI0_A05137g),gene2168(YALI0_C06974g),gene2272(YALI0_C09350g),gene2344(YALI0_C11011g),gene2424(YALI0_C12918g),gene2636(YALI0_C18205g),gene2651(YALI0_C18513g),gene2680(YALI0_C…
CC	GO:0031975	envelope	13	81	94	259	0.15576	0.903657	gene1215(YALI0_B08965g),gene2497(YALI0_C14806g),gene2888(YALI0_C23815g),gene3569(YALI0_D14916g),gene4127(YALI0_E00814g),gene4958(YALI0_E19745g),gene5243(YALI0_E26081g),gene5655(YALI0_E34881g),gene6010(YALI0_F07667g),gene6545(YALI0_F19712g),gene6603(YALI0_F20988g),gene6753(YALI0_F24431g),gene6901(YALI0_F27753g)	gene1274(YALI0_B10274g),gene1305(YALI0_B10978g),gene1391(YALI0_B12958g),gene1402(YALI0_B13222g),gene1513(YALI0_B15664g),gene1522(YALI0_B15884g),gene1530(YALI0_B16060g),gene1646(YALI0_B18590g),gene1692(YALI0_B19646g),gene204(YALI0_A05137g),gene2168(YALI0_C06974g),gene2272(YALI0_C09350g),gene2344(YALI0_C11011g),gene2424(YALI0_C12918g),gene2636(YALI0_C18205g),gene2651(YALI0_C18513g),gene2680(YALI0_C…
BP	GO:0090150	establishment of protein localization to membrane	6	17	23	57	0.15799	0.903657	gene1087(YALI0_B05808g),gene1691(YALI0_B19624g),gene3683(YALI0_D17666g),gene5661(YALI0_E35046g),gene6706(YALI0_F23375g),gene6790(YALI0_F25289g)	gene1692(YALI0_B19646g),gene2168(YALI0_C06974g),gene2670(YALI0_C18997g),gene2795(YALI0_C21780g),gene3108(YALI0_D04554g),gene3214(YALI0_D06908g),gene3304(YALI0_D08866g),gene4173(YALI0_E01804g),gene4321(YALI0_E05115g),gene4372(YALI0_E06237g),gene5457(YALI0_E30745g),gene5629(YALI0_E34309g),gene6259(YALI0_F13387g),gene6626(YALI0_F21505g),gene6909(YALI0_F27929g),gene6985(YALI0_F29931g),gene7079(YALI0_…
BP	GO:1901360	organic cyclic compound metabolic process	144	311	455	1324	0.15893	0.903657	gene1023(YALI0_B04290g),gene1033(YALI0_B04510g),gene1057(YALI0_B05038g),gene1073(YALI0_B05478g),gene11(YALI0_A00369g),gene1215(YALI0_B08965g),gene1237(YALI0_B09449g),gene1244(YALI0_B09625g),gene1245(YALI0_B09647g),gene1247(YALI0_B09713g),gene1258(YALI0_B09977g),gene1353(YALI0_B12078g),gene1375(YALI0_B12584g),gene1401(YALI0_B13200g),gene1408(YALI0_B13376g),gene1419(YALI0_B13640g),gene1540(YALI0_B1…	gene1002(YALI0_B03784g),gene1016(YALI0_B04136g),gene1043(YALI0_B04752g),gene1044(YALI0_B04774g),gene1048(YALI0_B04851g),gene1059(YALI0_B05126g),gene1079(YALI0_B05632g),gene1092(YALI0_B05918g),gene1197(YALI0_B08514g),gene1198(YALI0_B08536g),gene1223(YALI0_B09119g),gene1264(YALI0_B10065g),gene1270(YALI0_B10197g),gene1271(YALI0_B10219g),gene1273(YALI0_B10263g),gene1288(YALI0_B10582g),gene1349(YALI0_…
BP	GO:0009112	nucleobase metabolic process	7	3	10	22	0.1607	0.903657	gene1353(YALI0_B12078g),gene1945(YALI0_C01859g),gene4138(YALI0_E01056g),gene5227(YALI0_E25740g),gene6079(YALI0_F09251g),gene6604(YALI0_F21010g),gene6674(YALI0_F22605g)	gene2895(YALI0_C23969g),gene3234(YALI0_D07370g),gene4509(YALI0_E09493g)
BP	GO:0015698	inorganic anion transport	8	2	10	22	0.1607	0.903657	gene1616(YALI0_B17930g),gene2195(YALI0_C07590g),gene2718(YALI0_C20053g),gene3959(YALI0_D24145g),gene5146(YALI0_E23859g),gene5160(YALI0_E24167g),gene840(YALI0_A21307g),gene984(YALI0_B03344g)	gene4487(YALI0_E09015g),gene6690(YALI0_F23023g)
BP	GO:0072527	pyrimidine-containing compound metabolic process	3	7	10	22	0.1607	0.903657	gene1945(YALI0_C01859g),gene2339(YALI0_C10901g),gene5029(YALI0_E21351g)	gene2532(YALI0_C15554g),gene2860(YALI0_C23210g),gene2895(YALI0_C23969g),gene3234(YALI0_D07370g),gene384(YALI0_A09768g),gene4281(YALI0_E04224g),gene4509(YALI0_E09493g)
BP	GO:0044255	cellular lipid metabolic process	41	38	79	216	0.16167	0.903657	gene1280(YALI0_B10406g),gene1582(YALI0_B17204g),gene1930(YALI0_C01485g),gene2246(YALI0_C08811g),gene2890(YALI0_C23859g),gene2922(YALI0_D00176g),gene3062(YALI0_D03480g),gene3184(YALI0_D06281g),gene3264(YALI0_D07986g),gene3272(YALI0_D08206g),gene3288(YALI0_D08558g),gene3715(YALI0_D18403g),gene3984(YALI0_D24750g),gene4095(YALI0_E00110g),gene4385(YALI0_E06567g),gene4532(YALI0_E10021g),gene4581(YALI0_…	gene1059(YALI0_B05126g),gene1198(YALI0_B08536g),gene1485(YALI0_B15059g),gene1526(YALI0_B15972g),gene1660(YALI0_B18876g),gene1682(YALI0_B19382g),gene1859(YALI0_B23298g),gene1970(YALI0_C02475g),gene2343(YALI0_C10989g),gene2360(YALI0_C11407g),gene2466(YALI0_C14036g),gene2644(YALI0_C18403g),gene2661(YALI0_C18755g),gene3084(YALI0_D04026g),gene3092(YALI0_D04202g),gene3102(YALI0_D04422g),gene3691(YALI0_…
CC	GO:0019867	outer membrane	2	11	13	30	0.16222	0.903657	gene5243(YALI0_E26081g),gene691(YALI0_A17831g)	gene2168(YALI0_C06974g),gene2344(YALI0_C11011g),gene278(YALI0_A07084g),gene2836(YALI0_C22704g),gene3102(YALI0_D04422g),gene3108(YALI0_D04554g),gene3722(YALI0_D18590g),gene4731(YALI0_E14487g),gene5457(YALI0_E30745g),gene6139(YALI0_F10615g),gene7046(YALI0_F31207g)
MF	GO:0004623	phospholipase A2 activity	3	2	5	9	0.16273	0.903657	gene3272(YALI0_D08206g),gene4797(YALI0_E16060g),gene5655(YALI0_E34881g)	gene3691(YALI0_D17842g),gene919(YALI0_B01771g)
MF	GO:0015605	organophosphate ester transmembrane transporter activity	1	4	5	9	0.16273	0.903657	gene6545(YALI0_F19712g)	gene2483(YALI0_C14498g),gene422(YALI0_A10659g),gene5908(YALI0_F05500g),gene652(YALI0_A16863g)
MF	GO:0017069	snRNA binding	0	5	5	9	0.16273	0.903657	-	gene3842(YALI0_D21450g),gene5337(YALI0_E28226g),gene5448(YALI0_E30569g),gene5608(YALI0_E33847g),gene6953(YALI0_F29073g)
MF	GO:1901682	sulfur compound transmembrane transporter activity	3	2	5	9	0.16273	0.903657	gene1616(YALI0_B17930g),gene5160(YALI0_E24167g),gene984(YALI0_B03344g)	gene2680(YALI0_C19195g),gene6690(YALI0_F23023g)
BP	GO:0072511	divalent inorganic cation transport	8	5	13	30	0.16302	0.903657	gene2929(YALI0_D00319g),gene3121(YALI0_D04873g),gene3324(YALI0_D09317g),gene4070(YALI0_D26818g),gene4124(YALI0_E00748g),gene4508(YALI0_E09471g),gene5162(YALI0_E24211g),gene957(YALI0_B02684g)	gene2397(YALI0_C12254g),gene2949(YALI0_D00759g),gene6508(YALI0_F18854g),gene6546(YALI0_F19734g),gene6632(YALI0_F21659g)
MF	GO:0016740	transferase activity	112	156	268	743	0.16663	0.903657	gene108(YALI0_A02673g),gene1199(YALI0_B08558g),gene1319(YALI0_B11286g),gene1375(YALI0_B12584g),gene1523(YALI0_B15906g),gene1575(YALI0_B17050g),gene1599(YALI0_B17556g),gene1661(YALI0_B18898g),gene1720(YALI0_B20328g),gene1772(YALI0_B21428g),gene1813(YALI0_B22308g),gene187(YALI0_A04697g),gene1905(YALI0_C00891g),gene1930(YALI0_C01485g),gene1933(YALI0_C01573g),gene2057(YALI0_C04433g),gene2064(YALI0_C0…	gene1044(YALI0_B04774g),gene1048(YALI0_B04851g),gene1084(YALI0_B05742g),gene1198(YALI0_B08536g),gene1201(YALI0_B08624g),gene1273(YALI0_B10263g),gene1288(YALI0_B10582g),gene1377(YALI0_B12628g),gene1470(YALI0_B14751g),gene1485(YALI0_B15059g),gene1513(YALI0_B15664g),gene1515(YALI0_B15708g),gene1522(YALI0_B15884g),gene1633(YALI0_B18304g),gene1682(YALI0_B19382g),gene1688(YALI0_B19558g),gene1707(YALI0_…
BP	GO:0046483	heterocycle metabolic process	138	303	441	1284	0.1691	0.903657	gene1023(YALI0_B04290g),gene1033(YALI0_B04510g),gene1057(YALI0_B05038g),gene1073(YALI0_B05478g),gene11(YALI0_A00369g),gene1215(YALI0_B08965g),gene1237(YALI0_B09449g),gene1244(YALI0_B09625g),gene1245(YALI0_B09647g),gene1247(YALI0_B09713g),gene1258(YALI0_B09977g),gene1353(YALI0_B12078g),gene1375(YALI0_B12584g),gene1401(YALI0_B13200g),gene1408(YALI0_B13376g),gene1419(YALI0_B13640g),gene1540(YALI0_B1…	gene1002(YALI0_B03784g),gene1016(YALI0_B04136g),gene1043(YALI0_B04752g),gene1044(YALI0_B04774g),gene1048(YALI0_B04851g),gene1079(YALI0_B05632g),gene1092(YALI0_B05918g),gene1197(YALI0_B08514g),gene1223(YALI0_B09119g),gene1264(YALI0_B10065g),gene1270(YALI0_B10197g),gene1271(YALI0_B10219g),gene1273(YALI0_B10263g),gene1288(YALI0_B10582g),gene1349(YALI0_B11968g),gene1361(YALI0_B12276g),gene1363(YALI0_…
BP	GO:0015807	L-amino acid transport	6	2	8	17	0.16972	0.903657	gene2390(YALI0_C12100g),gene3209(YALI0_D06798g),gene3770(YALI0_D19646g),gene4856(YALI0_E17457g),gene5817(YALI0_F03498g),gene6812(YALI0_F25795g)	gene4501(YALI0_E09284g),gene5986(YALI0_F07106g)
MF	GO:1901363	heterocyclic compound binding	214	310	524	1478	0.17032	0.903657	gene1073(YALI0_B05478g),gene1112(YALI0_B06413g),gene1138(YALI0_B07029g),gene1199(YALI0_B08558g),gene1244(YALI0_B09625g),gene1247(YALI0_B09713g),gene1358(YALI0_B12188g),gene1392(YALI0_B12980g),gene1401(YALI0_B13200g),gene1408(YALI0_B13376g),gene1419(YALI0_B13640g),gene1428(YALI0_B13838g),gene1464(YALI0_B14619g),gene1518(YALI0_B15774g),gene1523(YALI0_B15906g),gene1537(YALI0_B16214g),gene1540(YALI0_…	gene1016(YALI0_B04136g),gene1048(YALI0_B04851g),gene1059(YALI0_B05126g),gene1092(YALI0_B05918g),gene1101(YALI0_B06116g),gene1118(YALI0_B06578g),gene1270(YALI0_B10197g),gene1271(YALI0_B10219g),gene1273(YALI0_B10263g),gene1284(YALI0_B10494g),gene1288(YALI0_B10582g),gene1309(YALI0_B11066g),gene1349(YALI0_B11968g),gene1361(YALI0_B12276g),gene139(YALI0_A03509g),gene1420(YALI0_B13662g),gene1427(YALI0_B…
CC	GO:0045121	membrane raft	4	0	4	7	0.17159	0.903657	gene1163(YALI0_B07601g),gene6212(YALI0_F12331g),gene657(YALI0_A17020g),gene7018(YALI0_F30613g)	-
CC	GO:0098857	membrane microdomain	4	0	4	7	0.17159	0.903657	gene1163(YALI0_B07601g),gene6212(YALI0_F12331g),gene657(YALI0_A17020g),gene7018(YALI0_F30613g)	-
BP	GO:0006023	aminoglycan biosynthetic process	4	0	4	7	0.172	0.903657	gene1772(YALI0_B21428g),gene3016(YALI0_D02321g),gene3052(YALI0_D03179g),gene4033(YALI0_D25938g)	-
BP	GO:0019346	transsulfuration	4	0	4	7	0.172	0.903657	gene2942(YALI0_D00605g),gene3671(YALI0_D17402g),gene4000(YALI0_D25168g),gene5926(YALI0_F05874g)	-
BP	GO:0070475	rRNA base methylation	0	4	4	7	0.172	0.903657	-	gene3341(YALI0_D09691g),gene4159(YALI0_E01496g),gene5187(YALI0_E24761g),gene5958(YALI0_F06512g)
MF	GO:0016289	CoA hydrolase activity	4	3	7	14	0.17202	0.903657	gene2811(YALI0_C22121g),gene5035(YALI0_E21472g),gene5369(YALI0_E28853g),gene6798(YALI0_F25487g)	gene3181(YALI0_D06215g),gene5467(YALI0_E30965g),gene6822(YALI0_F26037g)
MF	GO:0016706	oxidoreductase activity, acting on paired donors, with incorporation or reduction of molecular oxygen, 2-oxoglutarate as one donor, and incorporation of one atom each of oxygen into both donors	5	2	7	14	0.17202	0.903657	gene2324(YALI0_C10604g),gene3829(YALI0_D21098g),gene4683(YALI0_E13343g),gene6684(YALI0_F22825g),gene845(YALI0_A21439g)	gene1757(YALI0_B21098g),gene6917(YALI0_F28105g)
CC	GO:0098589	membrane region	5	1	6	12	0.17542	0.903657	gene1163(YALI0_B07601g),gene1243(YALI0_B09603g),gene6212(YALI0_F12331g),gene657(YALI0_A17020g),gene7018(YALI0_F30613g)	gene2655(YALI0_C18623g)
CC	GO:0098799	outer mitochondrial membrane protein complex	1	5	6	12	0.17542	0.903657	gene5243(YALI0_E26081g)	gene2168(YALI0_C06974g),gene278(YALI0_A07084g),gene3108(YALI0_D04554g),gene3722(YALI0_D18590g),gene7046(YALI0_F31207g)
BP	GO:0000291	nuclear-transcribed mRNA catabolic process, exonucleolytic	0	6	6	12	0.17595	0.903657	-	gene1197(YALI0_B08514g),gene3151(YALI0_D05511g),gene3208(YALI0_D06776g),gene3404(YALI0_D11000g),gene5574(YALI0_E33121g),gene6569(YALI0_F20240g)
BP	GO:0006022	aminoglycan metabolic process	6	0	6	12	0.17595	0.903657	gene1772(YALI0_B21428g),gene2288(YALI0_C09680g),gene3016(YALI0_D02321g),gene3052(YALI0_D03179g),gene4033(YALI0_D25938g),gene5865(YALI0_F04532g)	-
BP	GO:0006353	DNA-templated transcription, termination	0	6	6	12	0.17595	0.903657	-	gene321(YALI0_A08151g),gene3524(YALI0_D13750g),gene4496(YALI0_E09196g),gene5351(YALI0_E28490g),gene6476(YALI0_F18194g),gene6725(YALI0_F23815g)
BP	GO:0006779	porphyrin-containing compound biosynthetic process	1	5	6	12	0.17595	0.903657	gene6534(YALI0_F19470g)	gene5421(YALI0_E29975g),gene6594(YALI0_F20790g),gene6721(YALI0_F23727g),gene6762(YALI0_F24651g),gene6849(YALI0_F26609g)
BP	GO:0006783	heme biosynthetic process	1	5	6	12	0.17595	0.903657	gene6534(YALI0_F19470g)	gene5421(YALI0_E29975g),gene6594(YALI0_F20790g),gene6721(YALI0_F23727g),gene6762(YALI0_F24651g),gene6849(YALI0_F26609g)
BP	GO:0033014	tetrapyrrole biosynthetic process	1	5	6	12	0.17595	0.903657	gene6534(YALI0_F19470g)	gene5421(YALI0_E29975g),gene6594(YALI0_F20790g),gene6721(YALI0_F23727g),gene6762(YALI0_F24651g),gene6849(YALI0_F26609g)
BP	GO:0010608	posttranscriptional regulation of gene expression	3	19	22	55	0.17716	0.903657	gene317(YALI0_A08063g),gene6066(YALI0_F08943g),gene6765(YALI0_F24717g)	gene1284(YALI0_B10494g),gene1757(YALI0_B21098g),gene2634(YALI0_C18161g),gene2637(YALI0_C18227g),gene265(YALI0_A06765g),gene3358(YALI0_D10065g),gene3706(YALI0_D18150g),gene3784(YALI0_D20020g),gene3871(YALI0_D22132g),gene4167(YALI0_E01672g),gene4384(YALI0_E06545g),gene5287(YALI0_E27049g),gene5544(YALI0_E32483g),gene6143(YALI0_F10725g),gene6310(YALI0_F14553g),gene6650(YALI0_F22055g),gene6776(YALI0_F…
BP	GO:0006605	protein targeting	9	28	37	97	0.1773	0.903657	gene1013(YALI0_B04070g),gene1087(YALI0_B05808g),gene1691(YALI0_B19624g),gene2138(YALI0_C06347g),gene5661(YALI0_E35046g),gene6204(YALI0_F12111g),gene6706(YALI0_F23375g),gene6715(YALI0_F23595g),gene6790(YALI0_F25289g)	gene1305(YALI0_B10978g),gene1391(YALI0_B12958g),gene2168(YALI0_C06974g),gene2651(YALI0_C18513g),gene2670(YALI0_C18997g),gene278(YALI0_A07084g),gene2795(YALI0_C21780g),gene2944(YALI0_D00649g),gene2947(YALI0_D00715g),gene3108(YALI0_D04554g),gene3214(YALI0_D06908g),gene3831(YALI0_D21142g),gene394(YALI0_A09988g),gene4173(YALI0_E01804g),gene4321(YALI0_E05115g),gene4372(YALI0_E06237g),gene4731(YALI0_E1…
BP	GO:0000041	transition metal ion transport	4	11	15	36	0.18371	0.903657	gene4070(YALI0_D26818g),gene4124(YALI0_E00748g),gene4508(YALI0_E09471g),gene957(YALI0_B02684g)	gene1781(YALI0_B21604g),gene2397(YALI0_C12254g),gene2731(YALI0_C20295g),gene2949(YALI0_D00759g),gene3207(YALI0_D06754g),gene5662(YALI0_E35112g),gene5983(YALI0_F07040g),gene6191(YALI0_F11825g),gene6546(YALI0_F19734g),gene6632(YALI0_F21659g),gene6746(YALI0_F24277g)
CC	GO:0005741	mitochondrial outer membrane	1	11	12	28	0.1872	0.903657	gene5243(YALI0_E26081g)	gene2168(YALI0_C06974g),gene2344(YALI0_C11011g),gene278(YALI0_A07084g),gene2836(YALI0_C22704g),gene3102(YALI0_D04422g),gene3108(YALI0_D04554g),gene3722(YALI0_D18590g),gene4731(YALI0_E14487g),gene5457(YALI0_E30745g),gene6139(YALI0_F10615g),gene7046(YALI0_F31207g)
BP	GO:0070838	divalent metal ion transport	7	5	12	28	0.18805	0.903657	gene2929(YALI0_D00319g),gene3121(YALI0_D04873g),gene3324(YALI0_D09317g),gene4070(YALI0_D26818g),gene4124(YALI0_E00748g),gene4508(YALI0_E09471g),gene5162(YALI0_E24211g)	gene2397(YALI0_C12254g),gene2949(YALI0_D00759g),gene6508(YALI0_F18854g),gene6546(YALI0_F19734g),gene6632(YALI0_F21659g)
MF	GO:0004300	enoyl-CoA hydratase activity	4	0	4	7	0.19109	0.903657	gene1280(YALI0_B10406g),gene6653(YALI0_F22121g),gene6937(YALI0_F28567g),gene794(YALI0_A20207g)	-
MF	GO:0015079	potassium ion transmembrane transporter activity	3	1	4	7	0.19109	0.903657	gene1613(YALI0_B17864g),gene2314(YALI0_C10311g),gene4598(YALI0_E11473g)	gene4237(YALI0_E03234g)
MF	GO:0016671	oxidoreductase activity, acting on a sulfur group of donors, disulfide as acceptor	1	3	4	7	0.19109	0.903657	gene1180(YALI0_B08140g)	gene1006(YALI0_B03916g),gene3337(YALI0_D09603g),gene5428(YALI0_E30151g)
MF	GO:0016881	acid-amino acid ligase activity	1	3	4	7	0.19109	0.903657	gene5427(YALI0_E30129g)	gene1096(YALI0_B06006g),gene396(YALI0_A10032g),gene6310(YALI0_F14553g)
MF	GO:0045182	translation regulator activity	1	3	4	7	0.19109	0.903657	gene317(YALI0_A08063g)	gene265(YALI0_A06765g),gene5544(YALI0_E32483g),gene6874(YALI0_F27159g)
MF	GO:0008028	monocarboxylic acid transmembrane transporter activity	5	5	10	22	0.19291	0.903657	gene1685(YALI0_B19470g),gene2584(YALI0_C16907g),gene2865(YALI0_C23298g),gene5565(YALI0_E32901g),gene6395(YALI0_F16423g)	gene2293(YALI0_C09823g),gene2530(YALI0_C15488g),gene2777(YALI0_C21406g),gene3788(YALI0_D20108g),gene5975(YALI0_F06842g)
MF	GO:0015179	L-amino acid transmembrane transporter activity	6	2	8	17	0.19892	0.903657	gene2390(YALI0_C12100g),gene3209(YALI0_D06798g),gene3770(YALI0_D19646g),gene4856(YALI0_E17457g),gene5817(YALI0_F03498g),gene6812(YALI0_F25795g)	gene4501(YALI0_E09284g),gene5986(YALI0_F07106g)
BP	GO:0098661	inorganic anion transmembrane transport	5	2	7	15	0.20091	0.903657	gene1616(YALI0_B17930g),gene2718(YALI0_C20053g),gene3959(YALI0_D24145g),gene5146(YALI0_E23859g),gene984(YALI0_B03344g)	gene4487(YALI0_E09015g),gene6690(YALI0_F23023g)
MF	GO:0008649	rRNA methyltransferase activity	0	6	6	12	0.20104	0.903657	-	gene4125(YALI0_E00770g),gene4159(YALI0_E01496g),gene5516(YALI0_E31933g),gene5958(YALI0_F06512g),gene6449(YALI0_F17622g),gene6993(YALI0_F30085g)
MF	GO:0016645	oxidoreductase activity, acting on the CH-NH group of donors	5	1	6	12	0.20104	0.903657	gene1244(YALI0_B09625g),gene1245(YALI0_B09647g),gene1353(YALI0_B12078g),gene2497(YALI0_C14806g),gene4138(YALI0_E01056g)	gene2230(YALI0_C08459g)
MF	GO:0016877	ligase activity, forming carbon-sulfur bonds	3	3	6	12	0.20104	0.903657	gene2723(YALI0_C20119g),gene4795(YALI0_E16016g),gene5849(YALI0_F04147g)	gene2631(YALI0_C18095g),gene5930(YALI0_F05962g),gene6549(YALI0_F19800g)
MF	GO:0048029	monosaccharide binding	4	2	6	12	0.20104	0.903657	gene1813(YALI0_B22308g),gene3790(YALI0_D20152g),gene4773(YALI0_E15488g),gene4979(YALI0_E20207g)	gene1757(YALI0_B21098g),gene2430(YALI0_C13090g)
MF	GO:0140102	catalytic activity, acting on a rRNA	0	6	6	12	0.20104	0.903657	-	gene4125(YALI0_E00770g),gene4159(YALI0_E01496g),gene5516(YALI0_E31933g),gene5958(YALI0_F06512g),gene6449(YALI0_F17622g),gene6993(YALI0_F30085g)
BP	GO:0009308	amine metabolic process	5	5	10	23	0.20367	0.903657	gene2641(YALI0_C18315g),gene2841(YALI0_C22792g),gene3493(YALI0_D13024g),gene3662(YALI0_D17182g),gene636(YALI0_A16445g)	gene1660(YALI0_B18876g),gene4262(YALI0_E03806g),gene4306(YALI0_E04763g),gene4742(YALI0_E14751g),gene965(YALI0_B02852g)
MF	GO:1904680	peptide transmembrane transporter activity	8	8	16	38	0.20379	0.903657	gene0(YALI0_A00110g),gene157(YALI0_A03949g),gene2584(YALI0_C16907g),gene4938(YALI0_E19294g),gene6099(YALI0_F09691g),gene6282(YALI0_F13959g),gene6395(YALI0_F16423g),gene6513(YALI0_F18964g)	gene278(YALI0_A07084g),gene4759(YALI0_E15136g),gene4861(YALI0_E17589g),gene5409(YALI0_E29711g),gene6123(YALI0_F10241g),gene6958(YALI0_F29183g),gene7046(YALI0_F31207g),gene933(YALI0_B02090g)
CC	GO:0005782	peroxisomal matrix	3	0	3	5	0.20829	0.903657	gene3747(YALI0_D19140g),gene4783(YALI0_E15708g),gene6715(YALI0_F23595g)	-
CC	GO:0031907	microbody lumen	3	0	3	5	0.20829	0.903657	gene3747(YALI0_D19140g),gene4783(YALI0_E15708g),gene6715(YALI0_F23595g)	-
MF	GO:0097159	organic cyclic compound binding	214	310	524	1484	0.2086	0.903657	gene1073(YALI0_B05478g),gene1112(YALI0_B06413g),gene1138(YALI0_B07029g),gene1199(YALI0_B08558g),gene1244(YALI0_B09625g),gene1247(YALI0_B09713g),gene1358(YALI0_B12188g),gene1392(YALI0_B12980g),gene1401(YALI0_B13200g),gene1408(YALI0_B13376g),gene1419(YALI0_B13640g),gene1428(YALI0_B13838g),gene1464(YALI0_B14619g),gene1518(YALI0_B15774g),gene1523(YALI0_B15906g),gene1537(YALI0_B16214g),gene1540(YALI0_…	gene1016(YALI0_B04136g),gene1048(YALI0_B04851g),gene1059(YALI0_B05126g),gene1092(YALI0_B05918g),gene1101(YALI0_B06116g),gene1118(YALI0_B06578g),gene1270(YALI0_B10197g),gene1271(YALI0_B10219g),gene1273(YALI0_B10263g),gene1284(YALI0_B10494g),gene1288(YALI0_B10582g),gene1309(YALI0_B11066g),gene1349(YALI0_B11968g),gene1361(YALI0_B12276g),gene139(YALI0_A03509g),gene1420(YALI0_B13662g),gene1427(YALI0_B…
BP	GO:0000018	regulation of DNA recombination	1	2	3	5	0.20869	0.903657	gene1540(YALI0_B16280g)	gene3645(YALI0_D16841g),gene6592(YALI0_F20746g)
BP	GO:0006047	UDP-N-acetylglucosamine metabolic process	3	0	3	5	0.20869	0.903657	gene1772(YALI0_B21428g),gene1927(YALI0_C01419g),gene3790(YALI0_D20152g)	-
BP	GO:0006085	acetyl-CoA biosynthetic process	0	3	3	5	0.20869	0.903657	-	gene3972(YALI0_D24431g),gene5650(YALI0_E34793g),gene5930(YALI0_F05962g)
BP	GO:0006545	glycine biosynthetic process	3	0	3	5	0.20869	0.903657	gene3886(YALI0_D22484g),gene4809(YALI0_E16346g),gene844(YALI0_A21417g)	-
BP	GO:0006627	protein processing involved in protein targeting to mitochondrion	0	3	3	5	0.20869	0.903657	-	gene1305(YALI0_B10978g),gene394(YALI0_A09988g),gene6260(YALI0_F13409g)
BP	GO:0006882	cellular zinc ion homeostasis	0	3	3	5	0.20869	0.903657	-	gene2397(YALI0_C12254g),gene4866(YALI0_E17677g),gene6546(YALI0_F19734g)
BP	GO:0009098	leucine biosynthetic process	1	2	3	5	0.20869	0.903657	gene2972(YALI0_D01265g)	gene1883(YALI0_C00407g),gene901(YALI0_B01364g)
BP	GO:0015804	neutral amino acid transport	1	2	3	5	0.20869	0.903657	gene2390(YALI0_C12100g)	gene4501(YALI0_E09284g),gene5986(YALI0_F07106g)
BP	GO:0017196	N-terminal peptidyl-methionine acetylation	0	3	3	5	0.20869	0.903657	-	gene2366(YALI0_C11539g),gene6051(YALI0_F08591g),gene6209(YALI0_F12221g)
BP	GO:0018206	peptidyl-methionine modification	0	3	3	5	0.20869	0.903657	-	gene2366(YALI0_C11539g),gene6051(YALI0_F08591g),gene6209(YALI0_F12221g)
BP	GO:0022413	reproductive process in single-celled organism	3	0	3	5	0.20869	0.903657	gene4469(YALI0_E08580g),gene5946(YALI0_F06270g),gene7028(YALI0_F30833g)	-
BP	GO:0035384	thioester biosynthetic process	0	3	3	5	0.20869	0.903657	-	gene3972(YALI0_D24431g),gene5650(YALI0_E34793g),gene5930(YALI0_F05962g)
BP	GO:0035434	copper ion transmembrane transport	1	2	3	5	0.20869	0.903657	gene957(YALI0_B02684g)	gene2731(YALI0_C20295g),gene6746(YALI0_F24277g)
BP	GO:0036265	RNA (guanine-N7)-methylation	0	3	3	5	0.20869	0.903657	-	gene1688(YALI0_B19558g),gene5187(YALI0_E24761g),gene5958(YALI0_F06512g)
BP	GO:0042908	xenobiotic transport	3	0	3	5	0.20869	0.903657	gene3961(YALI0_D24189g),gene4066(YALI0_D26730g),gene5207(YALI0_E25201g)	-
BP	GO:0055069	zinc ion homeostasis	0	3	3	5	0.20869	0.903657	-	gene2397(YALI0_C12254g),gene4866(YALI0_E17677g),gene6546(YALI0_F19734g)
BP	GO:0071616	acyl-CoA biosynthetic process	0	3	3	5	0.20869	0.903657	-	gene3972(YALI0_D24431g),gene5650(YALI0_E34793g),gene5930(YALI0_F05962g)
BP	GO:0090307	mitotic spindle assembly	1	2	3	5	0.20869	0.903657	gene5781(YALI0_F02673g)	gene2422(YALI0_C12859g),gene6293(YALI0_F14179g)
BP	GO:1901679	nucleotide transmembrane transport	0	3	3	5	0.20869	0.903657	-	gene2483(YALI0_C14498g),gene5908(YALI0_F05500g),gene652(YALI0_A16863g)
BP	GO:0006030	chitin metabolic process	5	0	5	10	0.2114	0.903657	gene1772(YALI0_B21428g),gene2288(YALI0_C09680g),gene3052(YALI0_D03179g),gene4033(YALI0_D25938g),gene5865(YALI0_F04532g)	-
BP	GO:0015942	formate metabolic process	2	3	5	10	0.2114	0.903657	gene1822(YALI0_B22506g),gene4722(YALI0_E14256g)	gene1704(YALI0_B19976g),gene2214(YALI0_C08074g),gene6945(YALI0_F28765g)
BP	GO:0031126	snoRNA 3'-end processing	0	5	5	10	0.2114	0.903657	-	gene3151(YALI0_D05511g),gene3208(YALI0_D06776g),gene4291(YALI0_E04444g),gene5574(YALI0_E33121g),gene6569(YALI0_F20240g)
BP	GO:0042183	formate catabolic process	2	3	5	10	0.2114	0.903657	gene1822(YALI0_B22506g),gene4722(YALI0_E14256g)	gene1704(YALI0_B19976g),gene2214(YALI0_C08074g),gene6945(YALI0_F28765g)
BP	GO:0046835	carbohydrate phosphorylation	4	1	5	10	0.2114	0.903657	gene1813(YALI0_B22308g),gene4773(YALI0_E15488g),gene4979(YALI0_E20207g),gene6150(YALI0_F10923g)	gene2430(YALI0_C13090g)
BP	GO:0070071	proton-transporting two-sector ATPase complex assembly	0	5	5	10	0.2114	0.903657	-	gene1588(YALI0_B17314g),gene2692(YALI0_C19448g),gene4167(YALI0_E01672g),gene4324(YALI0_E05181g),gene6145(YALI0_F10769g)
BP	GO:0072523	purine-containing compound catabolic process	4	1	5	10	0.2114	0.903657	gene316(YALI0_A08041g),gene5227(YALI0_E25740g),gene6079(YALI0_F09251g),gene6221(YALI0_F12529g)	gene6822(YALI0_F26037g)
MF	GO:0016891	endoribonuclease activity, producing 5'-phosphomonoesters	3	11	14	33	0.21544	0.903657	gene1775(YALI0_B21494g),gene494(YALI0_A12705g),gene6846(YALI0_F26543g)	gene1043(YALI0_B04752g),gene2029(YALI0_C03784g),gene253(YALI0_A06523g),gene3706(YALI0_D18150g),gene4390(YALI0_E06677g),gene493(YALI0_A12683g),gene5267(YALI0_E26587g),gene5377(YALI0_E29007g),gene579(YALI0_A15059g),gene5969(YALI0_F06732g),gene86(YALI0_A02178g)
BP	GO:0006417	regulation of translation	1	18	19	48	0.21555	0.903657	gene317(YALI0_A08063g)	gene1284(YALI0_B10494g),gene1757(YALI0_B21098g),gene2634(YALI0_C18161g),gene2637(YALI0_C18227g),gene265(YALI0_A06765g),gene3358(YALI0_D10065g),gene3706(YALI0_D18150g),gene3784(YALI0_D20020g),gene3871(YALI0_D22132g),gene4384(YALI0_E06545g),gene5287(YALI0_E27049g),gene5544(YALI0_E32483g),gene6143(YALI0_F10725g),gene6310(YALI0_F14553g),gene6650(YALI0_F22055g),gene6776(YALI0_F24981g),gene6874(YALI0_F…
BP	GO:0006629	lipid metabolic process	49	42	91	255	0.21695	0.903657	gene1175(YALI0_B08030g),gene1233(YALI0_B09361g),gene1280(YALI0_B10406g),gene1582(YALI0_B17204g),gene1824(YALI0_B22550g),gene1930(YALI0_C01485g),gene2046(YALI0_C04180g),gene2246(YALI0_C08811g),gene2890(YALI0_C23859g),gene2922(YALI0_D00176g),gene3062(YALI0_D03480g),gene3184(YALI0_D06281g),gene3264(YALI0_D07986g),gene3272(YALI0_D08206g),gene3288(YALI0_D08558g),gene3677(YALI0_D17534g),gene3715(YALI0_…	gene1059(YALI0_B05126g),gene1198(YALI0_B08536g),gene1268(YALI0_B10153g),gene1485(YALI0_B15059g),gene1526(YALI0_B15972g),gene1660(YALI0_B18876g),gene1682(YALI0_B19382g),gene1859(YALI0_B23298g),gene1970(YALI0_C02475g),gene2343(YALI0_C10989g),gene2360(YALI0_C11407g),gene2466(YALI0_C14036g),gene2644(YALI0_C18403g),gene2661(YALI0_C18755g),gene3084(YALI0_D04026g),gene3092(YALI0_D04202g),gene3102(YALI0_…
BP	GO:0044272	sulfur compound biosynthetic process	8	7	15	37	0.2188	0.903657	gene2942(YALI0_D00605g),gene3589(YALI0_D15400g),gene4128(YALI0_E00836g),gene4656(YALI0_E12683g),gene5029(YALI0_E21351g),gene5427(YALI0_E30129g),gene559(YALI0_A14498g),gene5926(YALI0_F05874g)	gene2532(YALI0_C15554g),gene384(YALI0_A09768g),gene3972(YALI0_D24431g),gene4281(YALI0_E04224g),gene5650(YALI0_E34793g),gene5930(YALI0_F05962g),gene6805(YALI0_F25641g)
BP	GO:0043628	ncRNA 3'-end processing	0	8	8	18	0.2208	0.903657	-	gene1197(YALI0_B08514g),gene3151(YALI0_D05511g),gene3208(YALI0_D06776g),gene3404(YALI0_D11000g),gene4291(YALI0_E04444g),gene509(YALI0_A13057g),gene5574(YALI0_E33121g),gene6569(YALI0_F20240g)
BP	GO:0090503	RNA phosphodiester bond hydrolysis, exonucleolytic	0	8	8	18	0.2208	0.903657	-	gene1197(YALI0_B08514g),gene2506(YALI0_C15048g),gene3151(YALI0_D05511g),gene3404(YALI0_D11000g),gene3524(YALI0_D13750g),gene4291(YALI0_E04444g),gene5304(YALI0_E27390g),gene5574(YALI0_E33121g)
MF	GO:0004222	metalloendopeptidase activity	3	6	9	20	0.22171	0.903657	gene4335(YALI0_E05423g),gene6010(YALI0_F07667g),gene6603(YALI0_F20988g)	gene3261(YALI0_D07920g),gene394(YALI0_A09988g),gene6052(YALI0_F08613g),gene6111(YALI0_F09988g),gene6145(YALI0_F10769g),gene6630(YALI0_F21615g)
MF	GO:0005375	copper ion transmembrane transporter activity	1	2	3	5	0.22695	0.903657	gene957(YALI0_B02684g)	gene2731(YALI0_C20295g),gene6746(YALI0_F24277g)
MF	GO:0008312	7S RNA binding	0	3	3	5	0.22695	0.903657	-	gene2670(YALI0_C18997g),gene5629(YALI0_E34309g),gene6626(YALI0_F21505g)
MF	GO:0015175	neutral amino acid transmembrane transporter activity	1	2	3	5	0.22695	0.903657	gene2390(YALI0_C12100g)	gene4501(YALI0_E09284g),gene5986(YALI0_F07106g)
MF	GO:0015301	anion:anion antiporter activity	2	1	3	5	0.22695	0.903657	gene1616(YALI0_B17930g),gene6545(YALI0_F19712g)	gene422(YALI0_A10659g)
MF	GO:0016841	ammonia-lyase activity	2	1	3	5	0.22695	0.903657	gene1537(YALI0_B16214g),gene1681(YALI0_B19360g)	gene3023(YALI0_D02497g)
MF	GO:0016889	endodeoxyribonuclease activity, producing 3'-phosphomonoesters	2	1	3	5	0.22695	0.903657	gene3794(YALI0_D20240g),gene5602(YALI0_E33715g)	gene6391(YALI0_F16335g)
MF	GO:0017070	U6 snRNA binding	0	3	3	5	0.22695	0.903657	-	gene5337(YALI0_E28226g),gene5608(YALI0_E33847g),gene6953(YALI0_F29073g)
MF	GO:0030976	thiamine pyrophosphate binding	1	2	3	5	0.22695	0.903657	gene3215(YALI0_D06930g)	gene1876(YALI0_C00253g),gene3362(YALI0_D10131g)
MF	GO:0042910	xenobiotic transmembrane transporter activity	3	0	3	5	0.22695	0.903657	gene3961(YALI0_D24189g),gene4066(YALI0_D26730g),gene5207(YALI0_E25201g)	-
CC	GO:0031968	organelle outer membrane	1	11	12	29	0.22782	0.903657	gene5243(YALI0_E26081g)	gene2168(YALI0_C06974g),gene2344(YALI0_C11011g),gene278(YALI0_A07084g),gene2836(YALI0_C22704g),gene3102(YALI0_D04422g),gene3108(YALI0_D04554g),gene3722(YALI0_D18590g),gene4731(YALI0_E14487g),gene5457(YALI0_E30745g),gene6139(YALI0_F10615g),gene7046(YALI0_F31207g)
BP	GO:0006725	cellular aromatic compound metabolic process	133	304	437	1281	0.22824	0.903657	gene1023(YALI0_B04290g),gene1033(YALI0_B04510g),gene1057(YALI0_B05038g),gene1073(YALI0_B05478g),gene11(YALI0_A00369g),gene1237(YALI0_B09449g),gene1247(YALI0_B09713g),gene1258(YALI0_B09977g),gene1353(YALI0_B12078g),gene1375(YALI0_B12584g),gene1401(YALI0_B13200g),gene1408(YALI0_B13376g),gene1419(YALI0_B13640g),gene1540(YALI0_B16280g),gene1635(YALI0_B18348g),gene1752(YALI0_B20988g),gene1772(YALI0_B2…	gene1002(YALI0_B03784g),gene1016(YALI0_B04136g),gene1043(YALI0_B04752g),gene1044(YALI0_B04774g),gene1048(YALI0_B04851g),gene1079(YALI0_B05632g),gene1092(YALI0_B05918g),gene1197(YALI0_B08514g),gene1223(YALI0_B09119g),gene1264(YALI0_B10065g),gene1270(YALI0_B10197g),gene1271(YALI0_B10219g),gene1273(YALI0_B10263g),gene1288(YALI0_B10582g),gene1349(YALI0_B11968g),gene1361(YALI0_B12276g),gene1363(YALI0_…
BP	GO:0006857	oligopeptide transport	8	4	12	29	0.22878	0.903657	gene0(YALI0_A00110g),gene157(YALI0_A03949g),gene2584(YALI0_C16907g),gene4938(YALI0_E19294g),gene6099(YALI0_F09691g),gene6282(YALI0_F13959g),gene6395(YALI0_F16423g),gene6513(YALI0_F18964g)	gene4861(YALI0_E17589g),gene5409(YALI0_E29711g),gene6123(YALI0_F10241g),gene933(YALI0_B02090g)
BP	GO:0035672	oligopeptide transmembrane transport	8	4	12	29	0.22878	0.903657	gene0(YALI0_A00110g),gene157(YALI0_A03949g),gene2584(YALI0_C16907g),gene4938(YALI0_E19294g),gene6099(YALI0_F09691g),gene6282(YALI0_F13959g),gene6395(YALI0_F16423g),gene6513(YALI0_F18964g)	gene4861(YALI0_E17589g),gene5409(YALI0_E29711g),gene6123(YALI0_F10241g),gene933(YALI0_B02090g)
MF	GO:0004185	serine-type carboxypeptidase activity	5	0	5	10	0.23686	0.903657	gene1901(YALI0_C00803g),gene2787(YALI0_C21604g),gene2881(YALI0_C23661g),gene3266(YALI0_D08052g),gene903(YALI0_B01408g)	-
MF	GO:0005199	structural constituent of cell wall	4	1	5	10	0.23686	0.903657	gene2844(YALI0_C22836g),gene4435(YALI0_E07832g),gene4915(YALI0_E18788g),gene5473(YALI0_E31108g)	gene5610(YALI0_E33891g)
MF	GO:0008863	formate dehydrogenase (NAD+) activity	2	3	5	10	0.23686	0.903657	gene1822(YALI0_B22506g),gene4722(YALI0_E14256g)	gene1704(YALI0_B19976g),gene2214(YALI0_C08074g),gene6945(YALI0_F28765g)
MF	GO:0015662	ATPase activity, coupled to transmembrane movement of ions, phosphorylative mechanism	5	0	5	10	0.23686	0.903657	gene3121(YALI0_D04873g),gene40(YALI0_A01023g),gene4508(YALI0_E09471g),gene4940(YALI0_E19338g),gene957(YALI0_B02684g)	-
MF	GO:0019200	carbohydrate kinase activity	4	1	5	10	0.23686	0.903657	gene1813(YALI0_B22308g),gene4773(YALI0_E15488g),gene4979(YALI0_E20207g),gene6150(YALI0_F10923g)	gene2430(YALI0_C13090g)
MF	GO:0070008	serine-type exopeptidase activity	5	0	5	10	0.23686	0.903657	gene1901(YALI0_C00803g),gene2787(YALI0_C21604g),gene2881(YALI0_C23661g),gene3266(YALI0_D08052g),gene903(YALI0_B01408g)	-
BP	GO:0006633	fatty acid biosynthetic process	2	7	9	21	0.23713	0.903657	gene4795(YALI0_E16016g),gene748(YALI0_A19096g)	gene1485(YALI0_B15059g),gene1682(YALI0_B19382g),gene2360(YALI0_C11407g),gene3972(YALI0_D24431g),gene5650(YALI0_E34793g),gene5970(YALI0_F06754g),gene7021(YALI0_F30679g)
BP	GO:0046434	organophosphate catabolic process	9	4	13	32	0.2391	0.903657	gene316(YALI0_A08041g),gene3272(YALI0_D08206g),gene4095(YALI0_E00110g),gene4797(YALI0_E16060g),gene5498(YALI0_E31603g),gene5665(YALI0_E35222g),gene6036(YALI0_F08217g),gene6207(YALI0_F12177g),gene643(YALI0_A16610g)	gene490(YALI0_A12573g),gene6811(YALI0_F25773g),gene6822(YALI0_F26037g),gene919(YALI0_B01771g)
BP	GO:0000054	ribosomal subunit export from nucleus	1	5	6	13	0.23921	0.903657	gene1262(YALI0_B10021g)	gene3495(YALI0_D13068g),gene4210(YALI0_E02618g),gene4463(YALI0_E08448g),gene6031(YALI0_F08151g),gene696(YALI0_A17941g)
BP	GO:0006778	porphyrin-containing compound metabolic process	1	5	6	13	0.23921	0.903657	gene6534(YALI0_F19470g)	gene5421(YALI0_E29975g),gene6594(YALI0_F20790g),gene6721(YALI0_F23727g),gene6762(YALI0_F24651g),gene6849(YALI0_F26609g)
BP	GO:0033013	tetrapyrrole metabolic process	1	5	6	13	0.23921	0.903657	gene6534(YALI0_F19470g)	gene5421(YALI0_E29975g),gene6594(YALI0_F20790g),gene6721(YALI0_F23727g),gene6762(YALI0_F24651g),gene6849(YALI0_F26609g)
BP	GO:0033750	ribosome localization	1	5	6	13	0.23921	0.903657	gene1262(YALI0_B10021g)	gene3495(YALI0_D13068g),gene4210(YALI0_E02618g),gene4463(YALI0_E08448g),gene6031(YALI0_F08151g),gene696(YALI0_A17941g)
BP	GO:0034250	positive regulation of cellular amide metabolic process	0	6	6	13	0.23921	0.903657	-	gene1284(YALI0_B10494g),gene2637(YALI0_C18227g),gene265(YALI0_A06765g),gene3784(YALI0_D20020g),gene5544(YALI0_E32483g),gene6143(YALI0_F10725g)
BP	GO:0042168	heme metabolic process	1	5	6	13	0.23921	0.903657	gene6534(YALI0_F19470g)	gene5421(YALI0_E29975g),gene6594(YALI0_F20790g),gene6721(YALI0_F23727g),gene6762(YALI0_F24651g),gene6849(YALI0_F26609g)
BP	GO:0043650	dicarboxylic acid biosynthetic process	4	2	6	13	0.23921	0.903657	gene1706(YALI0_B19998g),gene4138(YALI0_E01056g),gene6458(YALI0_F17820g),gene6963(YALI0_F29337g)	gene396(YALI0_A10032g),gene965(YALI0_B02852g)
BP	GO:0045727	positive regulation of translation	0	6	6	13	0.23921	0.903657	-	gene1284(YALI0_B10494g),gene2637(YALI0_C18227g),gene265(YALI0_A06765g),gene3784(YALI0_D20020g),gene5544(YALI0_E32483g),gene6143(YALI0_F10725g)
BP	GO:0071428	rRNA-containing ribonucleoprotein complex export from nucleus	1	5	6	13	0.23921	0.903657	gene1262(YALI0_B10021g)	gene3495(YALI0_D13068g),gene4210(YALI0_E02618g),gene4463(YALI0_E08448g),gene6031(YALI0_F08151g),gene696(YALI0_A17941g)
CC	GO:0000322	storage vacuole	32	7	39	106	0.24533	0.903657	gene1075(YALI0_B05522g),gene14(YALI0_A00418g),gene1505(YALI0_B15488g),gene1901(YALI0_C00803g),gene1902(YALI0_C00825g),gene2050(YALI0_C04279g),gene2138(YALI0_C06347g),gene2321(YALI0_C10494g),gene2390(YALI0_C12100g),gene2787(YALI0_C21604g),gene2881(YALI0_C23661g),gene3004(YALI0_D02046g),gene3266(YALI0_D08052g),gene3666(YALI0_D17270g),gene3907(YALI0_D22957g),gene4212(YALI0_E02662g),gene4325(YALI0_E0…	gene1759(YALI0_B21142g),gene2396(YALI0_C12232g),gene2426(YALI0_C12980g),gene2629(YALI0_C18051g),gene3865(YALI0_D22000g),gene5986(YALI0_F07106g),gene6441(YALI0_F17446g)
CC	GO:0000324	fungal-type vacuole	32	7	39	106	0.24533	0.903657	gene1075(YALI0_B05522g),gene14(YALI0_A00418g),gene1505(YALI0_B15488g),gene1901(YALI0_C00803g),gene1902(YALI0_C00825g),gene2050(YALI0_C04279g),gene2138(YALI0_C06347g),gene2321(YALI0_C10494g),gene2390(YALI0_C12100g),gene2787(YALI0_C21604g),gene2881(YALI0_C23661g),gene3004(YALI0_D02046g),gene3266(YALI0_D08052g),gene3666(YALI0_D17270g),gene3907(YALI0_D22957g),gene4212(YALI0_E02662g),gene4325(YALI0_E0…	gene1759(YALI0_B21142g),gene2396(YALI0_C12232g),gene2426(YALI0_C12980g),gene2629(YALI0_C18051g),gene3865(YALI0_D22000g),gene5986(YALI0_F07106g),gene6441(YALI0_F17446g)
BP	GO:0034248	regulation of cellular amide metabolic process	1	18	19	49	0.24814	0.903657	gene317(YALI0_A08063g)	gene1284(YALI0_B10494g),gene1757(YALI0_B21098g),gene2634(YALI0_C18161g),gene2637(YALI0_C18227g),gene265(YALI0_A06765g),gene3358(YALI0_D10065g),gene3706(YALI0_D18150g),gene3784(YALI0_D20020g),gene3871(YALI0_D22132g),gene4384(YALI0_E06545g),gene5287(YALI0_E27049g),gene5544(YALI0_E32483g),gene6143(YALI0_F10725g),gene6310(YALI0_F14553g),gene6650(YALI0_F22055g),gene6776(YALI0_F24981g),gene6874(YALI0_F…
BP	GO:0009066	aspartate family amino acid metabolic process	9	5	14	35	0.24828	0.903657	gene1153(YALI0_B07359g),gene1537(YALI0_B16214g),gene2942(YALI0_D00605g),gene4128(YALI0_E00836g),gene4340(YALI0_E05533g),gene4656(YALI0_E12683g),gene559(YALI0_A14498g),gene6963(YALI0_F29337g),gene844(YALI0_A21417g)	gene3023(YALI0_D02497g),gene4215(YALI0_E02728g),gene520(YALI0_A13387g),gene6805(YALI0_F25641g),gene6919(YALI0_F28149g)
MF	GO:0016790	thiolester hydrolase activity	4	4	8	18	0.25558	0.903657	gene2811(YALI0_C22121g),gene5035(YALI0_E21472g),gene5369(YALI0_E28853g),gene6798(YALI0_F25487g)	gene1485(YALI0_B15059g),gene3181(YALI0_D06215g),gene5467(YALI0_E30965g),gene6822(YALI0_F26037g)
BP	GO:0034220	ion transmembrane transport	48	26	74	208	0.25586	0.903657	gene1019(YALI0_B04202g),gene1111(YALI0_B06391g),gene1240(YALI0_B09537g),gene1551(YALI0_B16522g),gene1613(YALI0_B17864g),gene1616(YALI0_B17930g),gene1680(YALI0_B19338g),gene1685(YALI0_B19470g),gene2141(YALI0_C06424g),gene2314(YALI0_C10311g),gene2390(YALI0_C12100g),gene2541(YALI0_C15807g),gene2598(YALI0_C17237g),gene2718(YALI0_C20053g),gene2865(YALI0_C23298g),gene2929(YALI0_D00319g),gene2965(YALI0_…	gene1426(YALI0_B13794g),gene1530(YALI0_B16060g),gene1709(YALI0_B20064g),gene2293(YALI0_C09823g),gene2397(YALI0_C12254g),gene2530(YALI0_C15488g),gene2731(YALI0_C20295g),gene2777(YALI0_C21406g),gene2949(YALI0_D00759g),gene3207(YALI0_D06754g),gene3788(YALI0_D20108g),gene4237(YALI0_E03234g),gene4487(YALI0_E09015g),gene4501(YALI0_E09284g),gene5409(YALI0_E29711g),gene5971(YALI0_F06776g),gene5975(YALI0_…
CC	GO:0005769	early endosome	3	1	4	8	0.25646	0.903657	gene2718(YALI0_C20053g),gene4907(YALI0_E18612g),gene6875(YALI0_F27181g)	gene4487(YALI0_E09015g)
BP	GO:0000491	small nucleolar ribonucleoprotein complex assembly	0	4	4	8	0.257	0.903657	-	gene1271(YALI0_B10219g),gene4593(YALI0_E11363g),gene5673(YALI0_F00242g),gene6023(YALI0_F07953g)
BP	GO:0006379	mRNA cleavage	0	4	4	8	0.257	0.903657	-	gene321(YALI0_A08151g),gene3571(YALI0_D14982g),gene6243(YALI0_F13068g),gene6445(YALI0_F17534g)
BP	GO:0009074	aromatic amino acid family catabolic process	2	2	4	8	0.257	0.903657	gene1793(YALI0_B21846g),gene2656(YALI0_C18645g)	gene4262(YALI0_E03806g),gene965(YALI0_B02852g)
BP	GO:0034982	mitochondrial protein processing	0	4	4	8	0.257	0.903657	-	gene1305(YALI0_B10978g),gene394(YALI0_A09988g),gene6145(YALI0_F10769g),gene6260(YALI0_F13409g)
BP	GO:0043408	regulation of MAPK cascade	4	0	4	8	0.257	0.903657	gene1523(YALI0_B15906g),gene2012(YALI0_C03399g),gene5700(YALI0_F00858g),gene9(YALI0_A00330g)	-
BP	GO:0043487	regulation of RNA stability	3	1	4	8	0.257	0.903657	gene317(YALI0_A08063g),gene6066(YALI0_F08943g),gene6765(YALI0_F24717g)	gene4167(YALI0_E01672g)
BP	GO:0043488	regulation of mRNA stability	3	1	4	8	0.257	0.903657	gene317(YALI0_A08063g),gene6066(YALI0_F08943g),gene6765(YALI0_F24717g)	gene4167(YALI0_E01672g)
BP	GO:0043928	exonucleolytic nuclear-transcribed mRNA catabolic process involved in deadenylation-dependent decay	0	4	4	8	0.257	0.903657	-	gene1197(YALI0_B08514g),gene3151(YALI0_D05511g),gene3404(YALI0_D11000g),gene5574(YALI0_E33121g)
BP	GO:0045332	phospholipid translocation	4	0	4	8	0.257	0.903657	gene1887(YALI0_C00495g),gene4278(YALI0_E04158g),gene4279(YALI0_E04169g),gene4841(YALI0_E17105g)	-
BP	GO:0046475	glycerophospholipid catabolic process	3	1	4	8	0.257	0.903657	gene3272(YALI0_D08206g),gene4797(YALI0_E16060g),gene6036(YALI0_F08217g)	gene919(YALI0_B01771g)
BP	GO:0051054	positive regulation of DNA metabolic process	0	4	4	8	0.257	0.903657	-	gene3645(YALI0_D16841g),gene4852(YALI0_E17369g),gene6592(YALI0_F20746g),gene6617(YALI0_F21329g)
BP	GO:0051788	response to misfolded protein	4	0	4	8	0.257	0.903657	gene3343(YALI0_D09735g),gene5243(YALI0_E26081g),gene6206(YALI0_F12155g),gene6596(YALI0_F20834g)	-
BP	GO:0071804	cellular potassium ion transport	3	1	4	8	0.257	0.903657	gene1613(YALI0_B17864g),gene2314(YALI0_C10311g),gene4598(YALI0_E11473g)	gene4237(YALI0_E03234g)
BP	GO:0071805	potassium ion transmembrane transport	3	1	4	8	0.257	0.903657	gene1613(YALI0_B17864g),gene2314(YALI0_C10311g),gene4598(YALI0_E11473g)	gene4237(YALI0_E03234g)
CC	GO:0031981	nuclear lumen	29	139	168	485	0.25747	0.903657	gene1375(YALI0_B12584g),gene1408(YALI0_B13376g),gene1865(YALI0_B23430g),gene2241(YALI0_C08701g),gene2285(YALI0_C09614g),gene2301(YALI0_C10032g),gene2403(YALI0_C12364g),gene2467(YALI0_C14058g),gene2566(YALI0_C16500g),gene2591(YALI0_C17061g),gene2902(YALI0_C24123g),gene3129(YALI0_D05041g),gene3452(YALI0_D12078g),gene3456(YALI0_D12166g),gene4077(YALI0_D26972g),gene433(YALI0_A10945g),gene4529(YALI0_E…	gene1002(YALI0_B03784g),gene1016(YALI0_B04136g),gene1043(YALI0_B04752g),gene1048(YALI0_B04851g),gene1197(YALI0_B08514g),gene1264(YALI0_B10065g),gene1344(YALI0_B11880g),gene1349(YALI0_B11968g),gene1361(YALI0_B12276g),gene1363(YALI0_B12320g),gene1411(YALI0_B13442g),gene1470(YALI0_B14751g),gene1471(YALI0_B14773g),gene149(YALI0_A03773g),gene154(YALI0_A03905g),gene1557(YALI0_B16654g),gene1568(YALI0_B1…
CC	GO:0000126	transcription factor TFIIIB complex	0	2	2	3	0.25789	0.903657	-	gene4942(YALI0_E19382g),gene5153(YALI0_E24035g)
CC	GO:0000328	fungal-type vacuole lumen	2	0	2	3	0.25789	0.903657	gene6398(YALI0_F16489g),gene6792(YALI0_F25333g)	-
CC	GO:0005742	mitochondrial outer membrane translocase complex	0	2	2	3	0.25789	0.903657	-	gene278(YALI0_A07084g),gene7046(YALI0_F31207g)
CC	GO:0005947	mitochondrial alpha-ketoglutarate dehydrogenase complex	2	0	2	3	0.25789	0.903657	gene3295(YALI0_D08690g),gene5886(YALI0_F05038g)	-
CC	GO:0030062	mitochondrial tricarboxylic acid cycle enzyme complex	2	0	2	3	0.25789	0.903657	gene3295(YALI0_D08690g),gene5886(YALI0_F05038g)	-
CC	GO:0043527	tRNA methyltransferase complex	0	2	2	3	0.25789	0.903657	-	gene1288(YALI0_B10582g),gene6680(YALI0_F22737g)
CC	GO:0071540	eukaryotic translation initiation factor 3 complex, eIF3e	0	2	2	3	0.25789	0.903657	-	gene2557(YALI0_C16247g),gene6512(YALI0_F18942g)
CC	GO:1990316	ATG1/ULK1 kinase complex	2	0	2	3	0.25789	0.903657	gene1036(YALI0_B04598g),gene5814(YALI0_F03432g)	-
BP	GO:0000066	mitochondrial ornithine transport	2	0	2	3	0.25824	0.903657	gene3209(YALI0_D06798g),gene4856(YALI0_E17457g)	-
BP	GO:0000098	sulfur amino acid catabolic process	2	0	2	3	0.25824	0.903657	gene5929(YALI0_F05940g),gene6465(YALI0_F17974g)	-
BP	GO:0000188	inactivation of MAPK activity	2	0	2	3	0.25824	0.903657	gene2012(YALI0_C03399g),gene5700(YALI0_F00858g)	-
BP	GO:0000255	allantoin metabolic process	2	0	2	3	0.25824	0.903657	gene3712(YALI0_D18337g),gene5968(YALI0_F06710g)	-
BP	GO:0000256	allantoin catabolic process	2	0	2	3	0.25824	0.903657	gene3712(YALI0_D18337g),gene5968(YALI0_F06710g)	-
BP	GO:0000966	RNA 5'-end processing	0	2	2	3	0.25824	0.903657	-	gene1016(YALI0_B04136g),gene1402(YALI0_B13222g)
BP	GO:0001676	long-chain fatty acid metabolic process	1	1	2	3	0.25824	0.903657	gene4795(YALI0_E16016g)	gene1682(YALI0_B19382g)
BP	GO:0006097	glyoxylate cycle	2	0	2	3	0.25824	0.903657	gene3747(YALI0_D19140g),gene4783(YALI0_E15708g)	-
BP	GO:0006108	malate metabolic process	0	2	2	3	0.25824	0.903657	-	gene2158(YALI0_C06776g),gene4908(YALI0_E18634g)
BP	GO:0006228	UTP biosynthetic process	0	2	2	3	0.25824	0.903657	-	gene2895(YALI0_C23969g),gene4509(YALI0_E09493g)
BP	GO:0006546	glycine catabolic process	2	0	2	3	0.25824	0.903657	gene389(YALI0_A09856g),gene5789(YALI0_F02849g)	-
BP	GO:0006571	tyrosine biosynthetic process	2	0	2	3	0.25824	0.903657	gene2088(YALI0_C05258g),gene5013(YALI0_E20977g)	-
BP	GO:0006984	ER-nucleus signaling pathway	1	1	2	3	0.25824	0.903657	gene3586(YALI0_D15334g)	gene3871(YALI0_D22132g)
BP	GO:0006991	response to sterol depletion	1	1	2	3	0.25824	0.903657	gene3586(YALI0_D15334g)	gene3871(YALI0_D22132g)
BP	GO:0008614	pyridoxine metabolic process	1	1	2	3	0.25824	0.903657	gene4996(YALI0_E20603g)	gene3544(YALI0_D14322g)
BP	GO:0009176	pyrimidine deoxyribonucleoside monophosphate metabolic process	1	1	2	3	0.25824	0.903657	gene2339(YALI0_C10901g)	gene2860(YALI0_C23210g)
BP	GO:0009177	pyrimidine deoxyribonucleoside monophosphate biosynthetic process	1	1	2	3	0.25824	0.903657	gene2339(YALI0_C10901g)	gene2860(YALI0_C23210g)
BP	GO:0015791	polyol transport	1	1	2	3	0.25824	0.903657	gene6471(YALI0_F18084g)	gene6731(YALI0_F23903g)
BP	GO:0015798	myo-inositol transport	1	1	2	3	0.25824	0.903657	gene6471(YALI0_F18084g)	gene6731(YALI0_F23903g)
BP	GO:0015822	ornithine transport	2	0	2	3	0.25824	0.903657	gene3209(YALI0_D06798g),gene4856(YALI0_E17457g)	-
BP	GO:0019343	cysteine biosynthetic process via cystathionine	2	0	2	3	0.25824	0.903657	gene2942(YALI0_D00605g),gene5926(YALI0_F05874g)	-
BP	GO:0019432	triglyceride biosynthetic process	1	1	2	3	0.25824	0.903657	gene3264(YALI0_D07986g)	gene411(YALI0_A10362g)
BP	GO:0019464	glycine decarboxylation via glycine cleavage system	2	0	2	3	0.25824	0.903657	gene389(YALI0_A09856g),gene5789(YALI0_F02849g)	-
BP	GO:0030007	cellular potassium ion homeostasis	2	0	2	3	0.25824	0.903657	gene1613(YALI0_B17864g),gene4189(YALI0_E02156g)	-
BP	GO:0031554	regulation of DNA-templated transcription, termination	0	2	2	3	0.25824	0.903657	-	gene4496(YALI0_E09196g),gene6725(YALI0_F23815g)
BP	GO:0031555	transcriptional attenuation	0	2	2	3	0.25824	0.903657	-	gene4496(YALI0_E09196g),gene6725(YALI0_F23815g)
BP	GO:0031564	transcription antitermination	0	2	2	3	0.25824	0.903657	-	gene4496(YALI0_E09196g),gene6725(YALI0_F23815g)
BP	GO:0031590	wybutosine metabolic process	0	2	2	3	0.25824	0.903657	-	gene3874(YALI0_D22220g),gene5578(YALI0_E33209g)
BP	GO:0031591	wybutosine biosynthetic process	0	2	2	3	0.25824	0.903657	-	gene3874(YALI0_D22220g),gene5578(YALI0_E33209g)
BP	GO:0032187	actomyosin contractile ring localization	1	1	2	3	0.25824	0.903657	gene3255(YALI0_D07810g)	gene6007(YALI0_F07601g)
BP	GO:0032933	SREBP signaling pathway	1	1	2	3	0.25824	0.903657	gene3586(YALI0_D15334g)	gene3871(YALI0_D22132g)
BP	GO:0034473	U1 snRNA 3'-end processing	0	2	2	3	0.25824	0.903657	-	gene1197(YALI0_B08514g),gene3404(YALI0_D11000g)
BP	GO:0034476	U5 snRNA 3'-end processing	0	2	2	3	0.25824	0.903657	-	gene1197(YALI0_B08514g),gene3404(YALI0_D11000g)
BP	GO:0034720	histone H3-K4 demethylation	2	0	2	3	0.25824	0.903657	gene1865(YALI0_B23430g),gene4077(YALI0_D26972g)	-
BP	GO:0035247	peptidyl-arginine omega-N-methylation	0	2	2	3	0.25824	0.903657	-	gene3487(YALI0_D12859g),gene6598(YALI0_F20878g)
BP	GO:0036214	contractile ring localization	1	1	2	3	0.25824	0.903657	gene3255(YALI0_D07810g)	gene6007(YALI0_F07601g)
BP	GO:0042542	response to hydrogen peroxide	1	1	2	3	0.25824	0.903657	gene7035(YALI0_F30987g)	gene5627(YALI0_E34265g)
BP	GO:0042770	signal transduction in response to DNA damage	1	1	2	3	0.25824	0.903657	gene4700(YALI0_E13750g)	gene4205(YALI0_E02508g)
BP	GO:0043407	negative regulation of MAP kinase activity	2	0	2	3	0.25824	0.903657	gene2012(YALI0_C03399g),gene5700(YALI0_F00858g)	-
BP	GO:0043409	negative regulation of MAPK cascade	2	0	2	3	0.25824	0.903657	gene2012(YALI0_C03399g),gene5700(YALI0_F00858g)	-
BP	GO:0043605	cellular amide catabolic process	2	0	2	3	0.25824	0.903657	gene3712(YALI0_D18337g),gene5968(YALI0_F06710g)	-
BP	GO:0045002	double-strand break repair via single-strand annealing	2	0	2	3	0.25824	0.903657	gene2884(YALI0_C23727g),gene5772(YALI0_F02431g)	-
BP	GO:0046051	UTP metabolic process	0	2	2	3	0.25824	0.903657	-	gene2895(YALI0_C23969g),gene4509(YALI0_E09493g)
BP	GO:0046113	nucleobase catabolic process	2	0	2	3	0.25824	0.903657	gene1945(YALI0_C01859g),gene5227(YALI0_E25740g)	-
BP	GO:0046460	neutral lipid biosynthetic process	1	1	2	3	0.25824	0.903657	gene3264(YALI0_D07986g)	gene411(YALI0_A10362g)
BP	GO:0046463	acylglycerol biosynthetic process	1	1	2	3	0.25824	0.903657	gene3264(YALI0_D07986g)	gene411(YALI0_A10362g)
BP	GO:0046487	glyoxylate metabolic process	2	0	2	3	0.25824	0.903657	gene3747(YALI0_D19140g),gene4783(YALI0_E15708g)	-
BP	GO:0061912	selective autophagy	2	0	2	3	0.25824	0.903657	gene1036(YALI0_B04598g),gene5814(YALI0_F03432g)	-
BP	GO:0070940	dephosphorylation of RNA polymerase II C-terminal domain	1	1	2	3	0.25824	0.903657	gene855(YALI0_B00308g)	gene6476(YALI0_F18194g)
BP	GO:0071042	nuclear polyadenylation-dependent mRNA catabolic process	0	2	2	3	0.25824	0.903657	-	gene1197(YALI0_B08514g),gene3404(YALI0_D11000g)
BP	GO:0071047	polyadenylation-dependent mRNA catabolic process	0	2	2	3	0.25824	0.903657	-	gene1197(YALI0_B08514g),gene3404(YALI0_D11000g)
BP	GO:0071501	cellular response to sterol depletion	1	1	2	3	0.25824	0.903657	gene3586(YALI0_D15334g)	gene3871(YALI0_D22132g)
BP	GO:0101030	tRNA-guanine transglycosylation	0	2	2	3	0.25824	0.903657	-	gene1633(YALI0_B18304g),gene6065(YALI0_F08921g)
BP	GO:1902405	mitotic actomyosin contractile ring localization	1	1	2	3	0.25824	0.903657	gene3255(YALI0_D07810g)	gene6007(YALI0_F07601g)
BP	GO:1903352	L-ornithine transmembrane transport	2	0	2	3	0.25824	0.903657	gene3209(YALI0_D06798g),gene4856(YALI0_E17457g)	-
BP	GO:1990575	mitochondrial L-ornithine transmembrane transport	2	0	2	3	0.25824	0.903657	gene3209(YALI0_D06798g),gene4856(YALI0_E17457g)	-
BP	GO:0000302	response to reactive oxygen species	3	4	7	16	0.26015	0.903657	gene2014(YALI0_C03465g),gene2571(YALI0_C16621g),gene7035(YALI0_F30987g)	gene1561(YALI0_B16742g),gene1710(YALI0_B20086g),gene5627(YALI0_E34265g),gene6581(YALI0_F20504g)
BP	GO:0072503	cellular divalent inorganic cation homeostasis	3	4	7	16	0.26015	0.903657	gene2929(YALI0_D00319g),gene3121(YALI0_D04873g),gene4508(YALI0_E09471g)	gene2397(YALI0_C12254g),gene3919(YALI0_D23265g),gene4866(YALI0_E17677g),gene6546(YALI0_F19734g)
BP	GO:0072507	divalent inorganic cation homeostasis	3	4	7	16	0.26015	0.903657	gene2929(YALI0_D00319g),gene3121(YALI0_D04873g),gene4508(YALI0_E09471g)	gene2397(YALI0_C12254g),gene3919(YALI0_D23265g),gene4866(YALI0_E17677g),gene6546(YALI0_F19734g)
BP	GO:0006414	translational elongation	2	9	11	27	0.2625	0.903657	gene2551(YALI0_C16049g),gene792(YALI0_A20152g)	gene2653(YALI0_C18557g),gene3232(YALI0_D07326g),gene4384(YALI0_E06545g),gene5287(YALI0_E27049g),gene6310(YALI0_F14553g),gene6650(YALI0_F22055g),gene6751(YALI0_F24387g),gene6776(YALI0_F24981g),gene785(YALI0_A19954g)
BP	GO:0006811	ion transport	65	36	101	288	0.26951	0.903657	gene1019(YALI0_B04202g),gene1111(YALI0_B06391g),gene1240(YALI0_B09537g),gene1551(YALI0_B16522g),gene1613(YALI0_B17864g),gene1616(YALI0_B17930g),gene1680(YALI0_B19338g),gene1685(YALI0_B19470g),gene1887(YALI0_C00495g),gene2141(YALI0_C06424g),gene2195(YALI0_C07590g),gene2314(YALI0_C10311g),gene2390(YALI0_C12100g),gene2541(YALI0_C15807g),gene2584(YALI0_C16907g),gene2598(YALI0_C17237g),gene2718(YALI0_…	gene1294(YALI0_B10736g),gene1426(YALI0_B13794g),gene1530(YALI0_B16060g),gene1709(YALI0_B20064g),gene1781(YALI0_B21604g),gene2293(YALI0_C09823g),gene2397(YALI0_C12254g),gene2530(YALI0_C15488g),gene2629(YALI0_C18051g),gene2731(YALI0_C20295g),gene2777(YALI0_C21406g),gene2949(YALI0_D00759g),gene3207(YALI0_D06754g),gene3304(YALI0_D08866g),gene3788(YALI0_D20108g),gene3919(YALI0_D23265g),gene422(YALI0_A…
MF	GO:0005310	dicarboxylic acid transmembrane transporter activity	4	2	6	13	0.27004	0.903657	gene2390(YALI0_C12100g),gene6203(YALI0_F12089g),gene7072(YALI0_F31845g),gene984(YALI0_B03344g)	gene2629(YALI0_C18051g),gene5986(YALI0_F07106g)
MF	GO:0016780	phosphotransferase activity, for other substituted phosphate groups	0	6	6	13	0.27004	0.903657	-	gene1682(YALI0_B19382g),gene2343(YALI0_C10989g),gene4044(YALI0_D26235g),gene4714(YALI0_E14102g),gene5266(YALI0_E26565g),gene6726(YALI0_F23837g)
MF	GO:0015198	oligopeptide transporter activity	8	4	12	29	0.27384	0.903657	gene0(YALI0_A00110g),gene157(YALI0_A03949g),gene2584(YALI0_C16907g),gene4938(YALI0_E19294g),gene6099(YALI0_F09691g),gene6282(YALI0_F13959g),gene6395(YALI0_F16423g),gene6513(YALI0_F18964g)	gene4861(YALI0_E17589g),gene5409(YALI0_E29711g),gene6123(YALI0_F10241g),gene933(YALI0_B02090g)
MF	GO:0016879	ligase activity, forming carbon-nitrogen bonds	5	7	12	29	0.27384	0.903657	gene3493(YALI0_D13024g),gene4138(YALI0_E01056g),gene5427(YALI0_E30129g),gene5685(YALI0_F00506g),gene6604(YALI0_F21010g)	gene1096(YALI0_B06006g),gene3234(YALI0_D07370g),gene396(YALI0_A10032g),gene4509(YALI0_E09493g),gene520(YALI0_A13387g),gene6310(YALI0_F14553g),gene6919(YALI0_F28149g)
MF	GO:0035673	oligopeptide transmembrane transporter activity	8	4	12	29	0.27384	0.903657	gene0(YALI0_A00110g),gene157(YALI0_A03949g),gene2584(YALI0_C16907g),gene4938(YALI0_E19294g),gene6099(YALI0_F09691g),gene6282(YALI0_F13959g),gene6395(YALI0_F16423g),gene6513(YALI0_F18964g)	gene4861(YALI0_E17589g),gene5409(YALI0_E29711g),gene6123(YALI0_F10241g),gene933(YALI0_B02090g)
MF	GO:0000064	L-ornithine transmembrane transporter activity	2	0	2	3	0.27455	0.903657	gene3209(YALI0_D06798g),gene4856(YALI0_E17457g)	-
MF	GO:0000171	ribonuclease MRP activity	0	2	2	3	0.27455	0.903657	-	gene2029(YALI0_C03784g),gene5377(YALI0_E29007g)
MF	GO:0003941	L-serine ammonia-lyase activity	2	0	2	3	0.27455	0.903657	gene1537(YALI0_B16214g),gene1681(YALI0_B19360g)	-
MF	GO:0003986	acetyl-CoA hydrolase activity	0	2	2	3	0.27455	0.903657	-	gene5467(YALI0_E30965g),gene6822(YALI0_F26037g)
MF	GO:0004061	arylformamidase activity	1	1	2	3	0.27455	0.903657	gene2697(YALI0_C19580g)	gene4262(YALI0_E03806g)
MF	GO:0004084	branched-chain-amino-acid transaminase activity	2	0	2	3	0.27455	0.903657	gene2972(YALI0_D01265g),gene3620(YALI0_D16269g)	-
MF	GO:0004096	catalase activity	1	1	2	3	0.27455	0.903657	gene7035(YALI0_F30987g)	gene5627(YALI0_E34265g)
MF	GO:0004151	dihydroorotase activity	0	2	2	3	0.27455	0.903657	-	gene2895(YALI0_C23969g),gene4509(YALI0_E09493g)
MF	GO:0004181	metallocarboxypeptidase activity	2	0	2	3	0.27455	0.903657	gene6398(YALI0_F16489g),gene6792(YALI0_F25333g)	-
MF	GO:0004488	methylenetetrahydrofolate dehydrogenase (NADP+) activity	2	0	2	3	0.27455	0.903657	gene1353(YALI0_B12078g),gene4138(YALI0_E01056g)	-
MF	GO:0004602	glutathione peroxidase activity	2	0	2	3	0.27455	0.903657	gene4196(YALI0_E02310g),gene4958(YALI0_E19745g)	-
MF	GO:0004629	phospholipase C activity	2	0	2	3	0.27455	0.903657	gene2046(YALI0_C04180g),gene6036(YALI0_F08217g)	-
MF	GO:0004794	L-threonine ammonia-lyase activity	1	1	2	3	0.27455	0.903657	gene1537(YALI0_B16214g)	gene3023(YALI0_D02497g)
MF	GO:0005247	voltage-gated chloride channel activity	1	1	2	3	0.27455	0.903657	gene2718(YALI0_C20053g)	gene4487(YALI0_E09015g)
MF	GO:0005254	chloride channel activity	1	1	2	3	0.27455	0.903657	gene2718(YALI0_C20053g)	gene4487(YALI0_E09015g)
MF	GO:0005365	myo-inositol transmembrane transporter activity	1	1	2	3	0.27455	0.903657	gene6471(YALI0_F18084g)	gene6731(YALI0_F23903g)
MF	GO:0005366	myo-inositol:proton symporter activity	1	1	2	3	0.27455	0.903657	gene6471(YALI0_F18084g)	gene6731(YALI0_F23903g)
MF	GO:0005471	ATP:ADP antiporter activity	1	1	2	3	0.27455	0.903657	gene6545(YALI0_F19712g)	gene422(YALI0_A10659g)
MF	GO:0008113	peptide-methionine (S)-S-oxide reductase activity	0	2	2	3	0.27455	0.903657	-	gene1006(YALI0_B03916g),gene5428(YALI0_E30151g)
MF	GO:0008271	secondary active sulfate transmembrane transporter activity	1	1	2	3	0.27455	0.903657	gene1616(YALI0_B17930g)	gene6690(YALI0_F23023g)
MF	GO:0008420	CTD phosphatase activity	1	1	2	3	0.27455	0.903657	gene855(YALI0_B00308g)	gene6476(YALI0_F18194g)
MF	GO:0008559	xenobiotic transmembrane transporting ATPase activity	2	0	2	3	0.27455	0.903657	gene3961(YALI0_D24189g),gene5207(YALI0_E25201g)	-
MF	GO:0015101	organic cation transmembrane transporter activity	2	0	2	3	0.27455	0.903657	gene1019(YALI0_B04202g),gene2541(YALI0_C15807g)	-
MF	GO:0015166	polyol transmembrane transporter activity	1	1	2	3	0.27455	0.903657	gene6471(YALI0_F18084g)	gene6731(YALI0_F23903g)
MF	GO:0015562	efflux transmembrane transporter activity	0	2	2	3	0.27455	0.903657	-	gene2397(YALI0_C12254g),gene6546(YALI0_F19734g)
MF	GO:0015665	alcohol transmembrane transporter activity	1	1	2	3	0.27455	0.903657	gene6471(YALI0_F18084g)	gene6731(YALI0_F23903g)
MF	GO:0016885	ligase activity, forming carbon-carbon bonds	1	1	2	3	0.27455	0.903657	gene4651(YALI0_E12595g)	gene2360(YALI0_C11407g)
MF	GO:0031404	chloride ion binding	1	1	2	3	0.27455	0.903657	gene2718(YALI0_C20053g)	gene4487(YALI0_E09015g)
MF	GO:0032453	histone demethylase activity (H3-K4 specific)	2	0	2	3	0.27455	0.903657	gene1865(YALI0_B23430g),gene4077(YALI0_D26972g)	-
MF	GO:0033549	MAP kinase phosphatase activity	2	0	2	3	0.27455	0.903657	gene2012(YALI0_C03399g),gene5700(YALI0_F00858g)	-
MF	GO:0033744	L-methionine:thioredoxin-disulfide S-oxidoreductase activity	0	2	2	3	0.27455	0.903657	-	gene1006(YALI0_B03916g),gene5428(YALI0_E30151g)
MF	GO:0036456	L-methionine-(S)-S-oxide reductase activity	0	2	2	3	0.27455	0.903657	-	gene1006(YALI0_B03916g),gene5428(YALI0_E30151g)
MF	GO:0050897	cobalt ion binding	2	0	2	3	0.27455	0.903657	gene3886(YALI0_D22484g),gene4809(YALI0_E16346g)	-
MF	GO:1901618	organic hydroxy compound transmembrane transporter activity	1	1	2	3	0.27455	0.903657	gene6471(YALI0_F18084g)	gene6731(YALI0_F23903g)
CC	GO:0000407	pre-autophagosomal structure	7	1	8	19	0.27578	0.903657	gene1036(YALI0_B04598g),gene1140(YALI0_B07073g),gene2723(YALI0_C20119g),gene4010(YALI0_D25388g),gene4705(YALI0_E13904g),gene5090(YALI0_E22737g),gene5814(YALI0_F03432g)	gene2182(YALI0_C07282g)
BP	GO:1901361	organic cyclic compound catabolic process	21	22	43	119	0.27992	0.903657	gene1244(YALI0_B09625g),gene1245(YALI0_B09647g),gene1775(YALI0_B21494g),gene1793(YALI0_B21846g),gene1945(YALI0_C01859g),gene2656(YALI0_C18645g),gene316(YALI0_A08041g),gene317(YALI0_A08063g),gene3712(YALI0_D18337g),gene4445(YALI0_E08074g),gene4905(YALI0_E18568g),gene494(YALI0_A12705g),gene5227(YALI0_E25740g),gene5968(YALI0_F06710g),gene6066(YALI0_F08943g),gene6079(YALI0_F09251g),gene6221(YALI0_F12…	gene1197(YALI0_B08514g),gene253(YALI0_A06523g),gene3131(YALI0_D05071g),gene3151(YALI0_D05511g),gene3208(YALI0_D06776g),gene3404(YALI0_D11000g),gene4167(YALI0_E01672g),gene4206(YALI0_E02530g),gene4262(YALI0_E03806g),gene4291(YALI0_E04444g),gene4305(YALI0_E04741g),gene493(YALI0_A12683g),gene5304(YALI0_E27390g),gene5574(YALI0_E33121g),gene579(YALI0_A15059g),gene6337(YALI0_F15147g),gene6391(YALI0_F16…
BP	GO:0030001	metal ion transport	13	13	26	70	0.28221	0.903657	gene1613(YALI0_B17864g),gene2314(YALI0_C10311g),gene2929(YALI0_D00319g),gene3121(YALI0_D04873g),gene3324(YALI0_D09317g),gene4070(YALI0_D26818g),gene4124(YALI0_E00748g),gene4189(YALI0_E02156g),gene4508(YALI0_E09471g),gene4598(YALI0_E11473g),gene5146(YALI0_E23859g),gene5162(YALI0_E24211g),gene957(YALI0_B02684g)	gene1781(YALI0_B21604g),gene2397(YALI0_C12254g),gene2731(YALI0_C20295g),gene2949(YALI0_D00759g),gene3207(YALI0_D06754g),gene4237(YALI0_E03234g),gene5662(YALI0_E35112g),gene5983(YALI0_F07040g),gene6191(YALI0_F11825g),gene6508(YALI0_F18854g),gene6546(YALI0_F19734g),gene6632(YALI0_F21659g),gene6746(YALI0_F24277g)
MF	GO:0008171	O-methyltransferase activity	1	3	4	8	0.28226	0.903657	gene976(YALI0_B03124g)	gene1522(YALI0_B15884g),gene5291(YALI0_E27137g),gene5516(YALI0_E31933g)
MF	GO:0008641	ubiquitin-like modifier activating enzyme activity	2	2	4	8	0.28226	0.903657	gene2723(YALI0_C20119g),gene5849(YALI0_F04147g)	gene2631(YALI0_C18095g),gene6549(YALI0_F19800g)
MF	GO:0015238	drug transmembrane transporter activity	3	1	4	8	0.28226	0.903657	gene2390(YALI0_C12100g),gene3961(YALI0_D24189g),gene5207(YALI0_E25201g)	gene5986(YALI0_F07106g)
MF	GO:0016653	oxidoreductase activity, acting on NAD(P)H, heme protein as acceptor	1	3	4	8	0.28226	0.903657	gene4810(YALI0_E16368g)	gene2644(YALI0_C18403g),gene3102(YALI0_D04422g),gene6762(YALI0_F24651g)
MF	GO:0016783	sulfurtransferase activity	1	3	4	8	0.28226	0.903657	gene3589(YALI0_D15400g)	gene1273(YALI0_B10263g),gene2631(YALI0_C18095g),gene6780(YALI0_F25069g)
MF	GO:0030145	manganese ion binding	3	1	4	8	0.28226	0.903657	gene2571(YALI0_C16621g),gene4425(YALI0_E07535g),gene4687(YALI0_E13464g)	gene6822(YALI0_F26037g)
MF	GO:0048038	quinone binding	4	0	4	8	0.28226	0.903657	gene2497(YALI0_C14806g),gene2641(YALI0_C18315g),gene2841(YALI0_C22792g),gene636(YALI0_A16445g)	-
MF	GO:0070403	NAD+ binding	1	3	4	8	0.28226	0.903657	gene2246(YALI0_C08811g)	gene3009(YALI0_D02145g),gene3143(YALI0_D05335g),gene3815(YALI0_D20724g)
MF	GO:0090484	drug transporter activity	3	1	4	8	0.28226	0.903657	gene2390(YALI0_C12100g),gene3961(YALI0_D24189g),gene5207(YALI0_E25201g)	gene5986(YALI0_F07106g)
MF	GO:0000166	nucleotide binding	111	136	247	696	0.28255	0.903657	gene1112(YALI0_B06413g),gene1138(YALI0_B07029g),gene1199(YALI0_B08558g),gene1244(YALI0_B09625g),gene1358(YALI0_B12188g),gene1392(YALI0_B12980g),gene1464(YALI0_B14619g),gene1518(YALI0_B15774g),gene1523(YALI0_B15906g),gene1599(YALI0_B17556g),gene1681(YALI0_B19360g),gene1706(YALI0_B19998g),gene172(YALI0_A04367g),gene1743(YALI0_B20834g),gene1813(YALI0_B22308g),gene1822(YALI0_B22506g),gene1865(YALI0_B…	gene1016(YALI0_B04136g),gene1092(YALI0_B05918g),gene1270(YALI0_B10197g),gene1309(YALI0_B11066g),gene1349(YALI0_B11968g),gene1420(YALI0_B13662g),gene1436(YALI0_B14014g),gene1470(YALI0_B14751g),gene1536(YALI0_B16192g),gene1568(YALI0_B16896g),gene1646(YALI0_B18590g),gene1647(YALI0_B18612g),gene1704(YALI0_B19976g),gene1776(YALI0_B21516g),gene1778(YALI0_B21538g),gene1797(YALI0_B21978g),gene1825(YALI0_…
MF	GO:1901265	nucleoside phosphate binding	111	136	247	696	0.28255	0.903657	gene1112(YALI0_B06413g),gene1138(YALI0_B07029g),gene1199(YALI0_B08558g),gene1244(YALI0_B09625g),gene1358(YALI0_B12188g),gene1392(YALI0_B12980g),gene1464(YALI0_B14619g),gene1518(YALI0_B15774g),gene1523(YALI0_B15906g),gene1599(YALI0_B17556g),gene1681(YALI0_B19360g),gene1706(YALI0_B19998g),gene172(YALI0_A04367g),gene1743(YALI0_B20834g),gene1813(YALI0_B22308g),gene1822(YALI0_B22506g),gene1865(YALI0_B…	gene1016(YALI0_B04136g),gene1092(YALI0_B05918g),gene1270(YALI0_B10197g),gene1309(YALI0_B11066g),gene1349(YALI0_B11968g),gene1420(YALI0_B13662g),gene1436(YALI0_B14014g),gene1470(YALI0_B14751g),gene1536(YALI0_B16192g),gene1568(YALI0_B16896g),gene1646(YALI0_B18590g),gene1647(YALI0_B18612g),gene1704(YALI0_B19976g),gene1776(YALI0_B21516g),gene1778(YALI0_B21538g),gene1797(YALI0_B21978g),gene1825(YALI0_…
BP	GO:0006415	translational termination	1	4	5	11	0.28698	0.903657	gene6241(YALI0_F13035g)	gene1757(YALI0_B21098g),gene3871(YALI0_D22132g),gene5091(YALI0_E22759g),gene696(YALI0_A17941g)
BP	GO:0051017	actin filament bundle assembly	3	2	5	11	0.28698	0.903657	gene1602(YALI0_B17622g),gene2962(YALI0_D01045g),gene7018(YALI0_F30613g)	gene1420(YALI0_B13662g),gene6007(YALI0_F07601g)
BP	GO:0061572	actin filament bundle organization	3	2	5	11	0.28698	0.903657	gene1602(YALI0_B17622g),gene2962(YALI0_D01045g),gene7018(YALI0_F30613g)	gene1420(YALI0_B13662g),gene6007(YALI0_F07601g)
MF	GO:0016836	hydro-lyase activity	5	8	13	32	0.2875	0.903657	gene1280(YALI0_B10406g),gene6653(YALI0_F22121g),gene6937(YALI0_F28567g),gene748(YALI0_A19096g),gene794(YALI0_A20207g)	gene1485(YALI0_B15059g),gene2158(YALI0_C06776g),gene2871(YALI0_C23408g),gene4215(YALI0_E02728g),gene6549(YALI0_F19800g),gene6594(YALI0_F20790g),gene6621(YALI0_F21406g),gene901(YALI0_B01364g)
MF	GO:0005198	structural molecule activity	6	67	73	200	0.29238	0.903657	gene2844(YALI0_C22836g),gene3497(YALI0_D13104g),gene4435(YALI0_E07832g),gene4915(YALI0_E18788g),gene5473(YALI0_E31108g),gene6794(YALI0_F25399g)	gene1101(YALI0_B06116g),gene1118(YALI0_B06578g),gene114(YALI0_A02849g),gene1177(YALI0_B08074g),gene121(YALI0_A03003g),gene1220(YALI0_B09075g),gene1284(YALI0_B10494g),gene1306(YALI0_B11000g),gene1482(YALI0_B14993g),gene1607(YALI0_B17732g),gene1826(YALI0_B22594g),gene2207(YALI0_C07887g),gene2242(YALI0_C08723g),gene2334(YALI0_C10802g),gene2451(YALI0_C13706g),gene252(YALI0_A06501g),gene2633(YALI0_C18…
MF	GO:0015932	nucleobase-containing compound transmembrane transporter activity	3	4	7	16	0.29567	0.903657	gene1204(YALI0_B08712g),gene2149(YALI0_C06578g),gene6545(YALI0_F19712g)	gene2483(YALI0_C14498g),gene422(YALI0_A10659g),gene5908(YALI0_F05500g),gene652(YALI0_A16863g)
BP	GO:0042180	cellular ketone metabolic process	0	10	10	25	0.30119	0.903657	-	gene1513(YALI0_B15664g),gene1522(YALI0_B15884g),gene2636(YALI0_C18205g),gene2661(YALI0_C18755g),gene356(YALI0_A09042g),gene4262(YALI0_E03806g),gene4763(YALI0_E15224g),gene5319(YALI0_E27764g),gene6878(YALI0_F27247g),gene6881(YALI0_F27313g)
BP	GO:0044774	mitotic DNA integrity checkpoint	3	3	6	14	0.30786	0.903657	gene1408(YALI0_B13376g),gene4700(YALI0_E13750g),gene5602(YALI0_E33715g)	gene1896(YALI0_C00671g),gene4205(YALI0_E02508g),gene5057(YALI0_E21978g)
BP	GO:0046112	nucleobase biosynthetic process	3	3	6	14	0.30786	0.903657	gene1353(YALI0_B12078g),gene4138(YALI0_E01056g),gene6604(YALI0_F21010g)	gene2895(YALI0_C23969g),gene3234(YALI0_D07370g),gene4509(YALI0_E09493g)
MF	GO:0016779	nucleotidyltransferase activity	2	26	28	74	0.30859	0.903657	gene1933(YALI0_C01573g),gene7005(YALI0_F30349g)	gene1048(YALI0_B04851g),gene1273(YALI0_B10263g),gene1515(YALI0_B15708g),gene2631(YALI0_C18095g),gene3193(YALI0_D06457g),gene321(YALI0_A08151g),gene3254(YALI0_D07788g),gene3680(YALI0_D17600g),gene3761(YALI0_D19448g),gene3809(YALI0_D20592g),gene4224(YALI0_E02904g),gene4326(YALI0_E05225g),gene4451(YALI0_E08184g),gene4507(YALI0_E09449g),gene4524(YALI0_E09845g),gene468(YALI0_A12001g),gene4729(YALI0_E1…
CC	GO:0019898	extrinsic component of membrane	3	8	11	28	0.30959	0.903657	gene1036(YALI0_B04598g),gene261(YALI0_A06699g),gene5814(YALI0_F03432g)	gene1513(YALI0_B15664g),gene1522(YALI0_B15884g),gene2636(YALI0_C18205g),gene356(YALI0_A09042g),gene4763(YALI0_E15224g),gene5544(YALI0_E32483g),gene6145(YALI0_F10769g),gene6878(YALI0_F27247g)
BP	GO:0006139	nucleobase-containing compound metabolic process	122	291	413	1220	0.31307	0.903657	gene1023(YALI0_B04290g),gene1033(YALI0_B04510g),gene1057(YALI0_B05038g),gene1073(YALI0_B05478g),gene11(YALI0_A00369g),gene1237(YALI0_B09449g),gene1247(YALI0_B09713g),gene1258(YALI0_B09977g),gene1353(YALI0_B12078g),gene1375(YALI0_B12584g),gene1401(YALI0_B13200g),gene1408(YALI0_B13376g),gene1419(YALI0_B13640g),gene1540(YALI0_B16280g),gene1635(YALI0_B18348g),gene1752(YALI0_B20988g),gene1772(YALI0_B2…	gene1002(YALI0_B03784g),gene1016(YALI0_B04136g),gene1043(YALI0_B04752g),gene1044(YALI0_B04774g),gene1048(YALI0_B04851g),gene1079(YALI0_B05632g),gene1092(YALI0_B05918g),gene1197(YALI0_B08514g),gene1223(YALI0_B09119g),gene1264(YALI0_B10065g),gene1270(YALI0_B10197g),gene1271(YALI0_B10219g),gene1273(YALI0_B10263g),gene1288(YALI0_B10582g),gene1349(YALI0_B11968g),gene1361(YALI0_B12276g),gene1363(YALI0_…
MF	GO:0043022	ribosome binding	1	7	8	19	0.31637	0.903657	gene792(YALI0_A20152g)	gene1692(YALI0_B19646g),gene265(YALI0_A06765g),gene5091(YALI0_E22759g),gene5629(YALI0_E34309g),gene6143(YALI0_F10725g),gene6371(YALI0_F15873g),gene887(YALI0_B01034g)
CC	GO:0005786	signal recognition particle, endoplasmic reticulum targeting	0	3	3	6	0.31758	0.903657	-	gene2670(YALI0_C18997g),gene5629(YALI0_E34309g),gene6626(YALI0_F21505g)
CC	GO:0048500	signal recognition particle	0	3	3	6	0.31758	0.903657	-	gene2670(YALI0_C18997g),gene5629(YALI0_E34309g),gene6626(YALI0_F21505g)
BP	GO:0000492	box C/D snoRNP assembly	0	3	3	6	0.31811	0.903657	-	gene4593(YALI0_E11363g),gene5673(YALI0_F00242g),gene6023(YALI0_F07953g)
BP	GO:0001101	response to acid chemical	3	0	3	6	0.31811	0.903657	gene1795(YALI0_B21890g),gene3886(YALI0_D22484g),gene4809(YALI0_E16346g)	-
BP	GO:0006031	chitin biosynthetic process	3	0	3	6	0.31811	0.903657	gene1772(YALI0_B21428g),gene3052(YALI0_D03179g),gene4033(YALI0_D25938g)	-
BP	GO:0006638	neutral lipid metabolic process	2	1	3	6	0.31811	0.903657	gene3264(YALI0_D07986g),gene5950(YALI0_F06358g)	gene411(YALI0_A10362g)
BP	GO:0009113	purine nucleobase biosynthetic process	3	0	3	6	0.31811	0.903657	gene1353(YALI0_B12078g),gene4138(YALI0_E01056g),gene6604(YALI0_F21010g)	-
BP	GO:0015723	bilirubin transport	2	1	3	6	0.31811	0.903657	gene6203(YALI0_F12089g),gene7072(YALI0_F31845g)	gene2629(YALI0_C18051g)
BP	GO:0015865	purine nucleotide transport	1	2	3	6	0.31811	0.903657	gene6545(YALI0_F19712g)	gene2483(YALI0_C14498g),gene422(YALI0_A10659g)
BP	GO:0017062	respiratory chain complex III assembly	0	3	3	6	0.31811	0.903657	-	gene2637(YALI0_C18227g),gene3063(YALI0_D03509g),gene4782(YALI0_E15686g)
BP	GO:0018342	protein prenylation	1	2	3	6	0.31811	0.903657	gene5938(YALI0_F06116g)	gene3563(YALI0_D14762g),gene4500(YALI0_E09276g)
BP	GO:0033314	mitotic DNA replication checkpoint	1	2	3	6	0.31811	0.903657	gene1408(YALI0_B13376g)	gene1896(YALI0_C00671g),gene5057(YALI0_E21978g)
BP	GO:0034551	mitochondrial respiratory chain complex III assembly	0	3	3	6	0.31811	0.903657	-	gene2637(YALI0_C18227g),gene3063(YALI0_D03509g),gene4782(YALI0_E15686g)
BP	GO:0043405	regulation of MAP kinase activity	3	0	3	6	0.31811	0.903657	gene1523(YALI0_B15906g),gene2012(YALI0_C03399g),gene5700(YALI0_F00858g)	-
BP	GO:0043484	regulation of RNA splicing	0	3	3	6	0.31811	0.903657	-	gene1361(YALI0_B12276g),gene4206(YALI0_E02530g),gene6953(YALI0_F29073g)
BP	GO:0046416	D-amino acid metabolic process	3	0	3	6	0.31811	0.903657	gene1681(YALI0_B19360g),gene6121(YALI0_F10197g),gene7017(YALI0_F30591g)	-
BP	GO:0071033	nuclear retention of pre-mRNA at the site of transcription	0	3	3	6	0.31811	0.903657	-	gene3151(YALI0_D05511g),gene4291(YALI0_E04444g),gene5574(YALI0_E33121g)
BP	GO:0071229	cellular response to acid chemical	3	0	3	6	0.31811	0.903657	gene1795(YALI0_B21890g),gene3886(YALI0_D22484g),gene4809(YALI0_E16346g)	-
BP	GO:0097033	mitochondrial respiratory chain complex III biogenesis	0	3	3	6	0.31811	0.903657	-	gene2637(YALI0_C18227g),gene3063(YALI0_D03509g),gene4782(YALI0_E15686g)
BP	GO:0097354	prenylation	1	2	3	6	0.31811	0.903657	gene5938(YALI0_F06116g)	gene3563(YALI0_D14762g),gene4500(YALI0_E09276g)
BP	GO:1901073	glucosamine-containing compound biosynthetic process	3	0	3	6	0.31811	0.903657	gene1772(YALI0_B21428g),gene3052(YALI0_D03179g),gene4033(YALI0_D25938g)	-
CC	GO:0005618	cell wall	17	3	20	54	0.32135	0.903657	gene1080(YALI0_B05654g),gene2288(YALI0_C09680g),gene2306(YALI0_C10135g),gene2501(YALI0_C14938g),gene2730(YALI0_C20273g),gene2844(YALI0_C22836g),gene4435(YALI0_E07832g),gene4540(YALI0_E10175g),gene4915(YALI0_E18788g),gene5019(YALI0_E21109g),gene5473(YALI0_E31108g),gene5585(YALI0_E33363g),gene6076(YALI0_F09163g),gene6136(YALI0_F10549g),gene695(YALI0_A17919g),gene848(YALI0_B00132g),gene858(YALI0_B00…	gene1730(YALI0_B20526g),gene5610(YALI0_E33891g),gene5630(YALI0_E34331g)
CC	GO:0030312	external encapsulating structure	17	3	20	54	0.32135	0.903657	gene1080(YALI0_B05654g),gene2288(YALI0_C09680g),gene2306(YALI0_C10135g),gene2501(YALI0_C14938g),gene2730(YALI0_C20273g),gene2844(YALI0_C22836g),gene4435(YALI0_E07832g),gene4540(YALI0_E10175g),gene4915(YALI0_E18788g),gene5019(YALI0_E21109g),gene5473(YALI0_E31108g),gene5585(YALI0_E33363g),gene6076(YALI0_F09163g),gene6136(YALI0_F10549g),gene695(YALI0_A17919g),gene848(YALI0_B00132g),gene858(YALI0_B00…	gene1730(YALI0_B20526g),gene5610(YALI0_E33891g),gene5630(YALI0_E34331g)
MF	GO:0016811	hydrolase activity, acting on carbon-nitrogen (but not peptide) bonds, in linear amides	7	5	12	30	0.32231	0.903657	gene1153(YALI0_B07359g),gene2697(YALI0_C19580g),gene4977(YALI0_E20163g),gene4996(YALI0_E20603g),gene6806(YALI0_F25663g),gene7028(YALI0_F30833g),gene822(YALI0_A20834g)	gene2125(YALI0_C06061g),gene3009(YALI0_D02145g),gene3815(YALI0_D20724g),gene4262(YALI0_E03806g),gene5055(YALI0_E21934g)
BP	GO:1901136	carbohydrate derivative catabolic process	6	1	7	17	0.32346	0.903657	gene1927(YALI0_C01419g),gene316(YALI0_A08041g),gene4977(YALI0_E20163g),gene5865(YALI0_F04532g),gene6221(YALI0_F12529g),gene7005(YALI0_F30349g)	gene6822(YALI0_F26037g)
BP	GO:0000122	negative regulation of transcription from RNA polymerase II promoter	9	4	13	34	0.326	0.903657	gene1865(YALI0_B23430g),gene3129(YALI0_D05041g),gene3950(YALI0_D23925g),gene4077(YALI0_D26972g),gene5318(YALI0_E27742g),gene5890(YALI0_F05126g),gene6644(YALI0_F21923g),gene6806(YALI0_F25663g),gene722(YALI0_A18469g)	gene3607(YALI0_D15818g),gene4496(YALI0_E09196g),gene4888(YALI0_E18161g),gene6725(YALI0_F23815g)
BP	GO:0031505	fungal-type cell wall organization	17	4	21	57	0.32697	0.903657	gene1080(YALI0_B05654g),gene1163(YALI0_B07601g),gene1635(YALI0_B18348g),gene2288(YALI0_C09680g),gene2306(YALI0_C10135g),gene2501(YALI0_C14938g),gene2730(YALI0_C20273g),gene4435(YALI0_E07832g),gene4540(YALI0_E10175g),gene5585(YALI0_E33363g),gene6076(YALI0_F09163g),gene6136(YALI0_F10549g),gene6212(YALI0_F12331g),gene6313(YALI0_F14619g),gene7028(YALI0_F30833g),gene848(YALI0_B00132g),gene858(YALI0_B0…	gene1730(YALI0_B20526g),gene3382(YALI0_D10549g),gene5630(YALI0_E34331g),gene878(YALI0_B00836g)
CC	GO:0000229	cytoplasmic chromosome	0	1	1	1	0.33234	0.903657	-	gene4355(YALI0_E05863g)
CC	GO:0000262	mitochondrial chromosome	0	1	1	1	0.33234	0.903657	-	gene4355(YALI0_E05863g)
CC	GO:0000421	autophagosome membrane	1	0	1	1	0.33234	0.903657	gene4212(YALI0_E02662g)	-
CC	GO:0000791	euchromatin	0	1	1	1	0.33234	0.903657	-	gene5796(YALI0_F03003g)
CC	GO:0002144	cytosolic tRNA wobble base thiouridylase complex	0	1	1	1	0.33234	0.903657	-	gene3680(YALI0_D17600g)
CC	GO:0005712	chiasma	1	0	1	1	0.33234	0.903657	gene2301(YALI0_C10032g)	-
CC	GO:0005719	nuclear euchromatin	0	1	1	1	0.33234	0.903657	-	gene5796(YALI0_F03003g)
CC	GO:0005760	gamma DNA polymerase complex	0	1	1	1	0.33234	0.903657	-	gene6531(YALI0_F19404g)
CC	GO:0005785	signal recognition particle receptor complex	1	0	1	1	0.33234	0.903657	gene6706(YALI0_F23375g)	-
CC	GO:0005951	carbamoyl-phosphate synthase complex	0	1	1	1	0.33234	0.903657	-	gene3234(YALI0_D07370g)
CC	GO:0009316	3-isopropylmalate dehydratase complex	0	1	1	1	0.33234	0.903657	-	gene901(YALI0_B01364g)
CC	GO:0030690	Noc1p-Noc2p complex	0	1	1	1	0.33234	0.903657	-	gene3449(YALI0_D12012g)
CC	GO:0030691	Noc2p-Noc3p complex	0	1	1	1	0.33234	0.903657	-	gene3449(YALI0_D12012g)
CC	GO:0031012	extracellular matrix	0	1	1	1	0.33234	0.903657	-	gene1526(YALI0_B15972g)
CC	GO:0032797	SMN complex	1	0	1	1	0.33234	0.903657	gene1752(YALI0_B20988g)	-
CC	GO:0033107	Cvt vesicle	1	0	1	1	0.33234	0.903657	gene4212(YALI0_E02662g)	-
CC	GO:0033110	Cvt vesicle membrane	1	0	1	1	0.33234	0.903657	gene4212(YALI0_E02662g)	-
CC	GO:0033565	ESCRT-0 complex	1	0	1	1	0.33234	0.903657	gene1013(YALI0_B04070g)	-
CC	GO:0033597	mitotic checkpoint complex	0	1	1	1	0.33234	0.903657	-	gene6538(YALI0_F19558g)
CC	GO:0034098	VCP-NPL4-UFD1 AAA ATPase complex	1	0	1	1	0.33234	0.903657	gene6206(YALI0_F12155g)	-
CC	GO:0036266	Cdc48p-Npl4p-Vms1p AAA ATPase complex	1	0	1	1	0.33234	0.903657	gene5243(YALI0_E26081g)	-
CC	GO:0036396	RNA N6-methyladenosine methyltransferase complex	1	0	1	1	0.33234	0.903657	gene990(YALI0_B03498g)	-
CC	GO:0044665	MLL1/2 complex	0	1	1	1	0.33234	0.903657	-	gene405(YALI0_A10252g)
CC	GO:0044853	plasma membrane raft	1	0	1	1	0.33234	0.903657	gene7018(YALI0_F30613g)	-
CC	GO:0045025	mitochondrial degradosome	0	1	1	1	0.33234	0.903657	-	gene6337(YALI0_F15147g)
CC	GO:0045293	mRNA editing complex	1	0	1	1	0.33234	0.903657	gene990(YALI0_B03498g)	-
CC	GO:0048189	Lid2 complex	0	1	1	1	0.33234	0.903657	-	gene5447(YALI0_E30547g)
CC	GO:0071339	MLL1 complex	0	1	1	1	0.33234	0.903657	-	gene405(YALI0_A10252g)
CC	GO:0071819	DUBm complex	0	1	1	1	0.33234	0.903657	-	gene6827(YALI0_F26136g)
CC	GO:0090730	Las1 complex	0	1	1	1	0.33234	0.903657	-	gene3727(YALI0_D18700g)
CC	GO:0097422	tubular endosome	1	0	1	1	0.33234	0.903657	gene4907(YALI0_E18612g)	-
CC	GO:1902773	GTPase activator complex	1	0	1	1	0.33234	0.903657	gene3588(YALI0_D15378g)	-
CC	GO:1903600	glutaminase complex	1	0	1	1	0.33234	0.903657	gene4996(YALI0_E20603g)	-
CC	GO:1905202	methylcrotonoyl-CoA carboxylase complex	1	0	1	1	0.33234	0.903657	gene4651(YALI0_E12595g)	-
CC	GO:1990298	bub1-bub3 complex	0	1	1	1	0.33234	0.903657	-	gene6538(YALI0_F19558g)
CC	GO:1990304	MUB1-RAD6-UBR2 ubiquitin ligase complex	1	0	1	1	0.33234	0.903657	gene4276(YALI0_E04114g)	-
CC	GO:1990334	Bfa1-Bub2 complex	1	0	1	1	0.33234	0.903657	gene3588(YALI0_D15378g)	-
BP	GO:0000019	regulation of mitotic recombination	0	1	1	1	0.33261	0.903657	-	gene6592(YALI0_F20746g)
BP	GO:0000316	sulfite transport	1	0	1	1	0.33261	0.903657	gene5160(YALI0_E24167g)	-
BP	GO:0000388	spliceosome conformational change to release U4 (or U4atac) and U1 (or U11)	0	1	1	1	0.33261	0.903657	-	gene6591(YALI0_F20724g)
BP	GO:0000423	mitophagy	1	0	1	1	0.33261	0.903657	gene5814(YALI0_F03432g)	-
BP	GO:0000432	positive regulation of transcription from RNA polymerase II promoter by glucose	1	0	1	1	0.33261	0.903657	gene2267(YALI0_C09232g)	-
BP	GO:0000436	carbon catabolite activation of transcription from RNA polymerase II promoter	1	0	1	1	0.33261	0.903657	gene2267(YALI0_C09232g)	-
BP	GO:0000448	cleavage in ITS2 between 5.8S rRNA and LSU-rRNA of tricistronic rRNA transcript (SSU-rRNA, 5.8S rRNA, LSU-rRNA)	0	1	1	1	0.33261	0.903657	-	gene4805(YALI0_E16258g)
BP	GO:0000472	endonucleolytic cleavage to generate mature 5'-end of SSU-rRNA from (SSU-rRNA, 5.8S rRNA, LSU-rRNA)	0	1	1	1	0.33261	0.903657	-	gene1016(YALI0_B04136g)
BP	GO:0000480	endonucleolytic cleavage in 5'-ETS of tricistronic rRNA transcript (SSU-rRNA, 5.8S rRNA, LSU-rRNA)	0	1	1	1	0.33261	0.903657	-	gene1016(YALI0_B04136g)
BP	GO:0000717	nucleotide-excision repair, DNA duplex unwinding	0	1	1	1	0.33261	0.903657	-	gene6592(YALI0_F20746g)
BP	GO:0000754	adaptation of signaling pathway by response to pheromone involved in conjugation with cellular fusion	1	0	1	1	0.33261	0.903657	gene5700(YALI0_F00858g)	-
BP	GO:0000770	peptide pheromone export	0	1	1	1	0.33261	0.903657	-	gene4360(YALI0_E05973g)
BP	GO:0000963	mitochondrial RNA processing	0	1	1	1	0.33261	0.903657	-	gene6232(YALI0_F12771g)
BP	GO:0000964	mitochondrial RNA 5'-end processing	0	1	1	1	0.33261	0.903657	-	gene1402(YALI0_B13222g)
BP	GO:0000965	mitochondrial RNA 3'-end processing	0	1	1	1	0.33261	0.903657	-	gene6337(YALI0_F15147g)
BP	GO:0000967	rRNA 5'-end processing	0	1	1	1	0.33261	0.903657	-	gene1016(YALI0_B04136g)
BP	GO:0001112	DNA-templated transcriptional open complex formation	0	1	1	1	0.33261	0.903657	-	gene6838(YALI0_F26367g)
BP	GO:0001113	transcriptional open complex formation at RNA polymerase II promoter	0	1	1	1	0.33261	0.903657	-	gene6838(YALI0_F26367g)
BP	GO:0001120	protein-DNA complex remodeling	0	1	1	1	0.33261	0.903657	-	gene6838(YALI0_F26367g)
BP	GO:0001192	maintenance of transcriptional fidelity during DNA-templated transcription elongation	0	1	1	1	0.33261	0.903657	-	gene6445(YALI0_F17534g)
BP	GO:0001193	maintenance of transcriptional fidelity during DNA-templated transcription elongation from RNA polymerase II promoter	0	1	1	1	0.33261	0.903657	-	gene6445(YALI0_F17534g)
BP	GO:0001408	guanine nucleotide transport	0	1	1	1	0.33261	0.903657	-	gene2483(YALI0_C14498g)
BP	GO:0001666	response to hypoxia	0	1	1	1	0.33261	0.903657	-	gene3871(YALI0_D22132g)
BP	GO:0001682	tRNA 5'-leader removal	0	1	1	1	0.33261	0.903657	-	gene5377(YALI0_E29007g)
BP	GO:0002128	tRNA nucleoside ribose methylation	0	1	1	1	0.33261	0.903657	-	gene6379(YALI0_F16049g)
BP	GO:0002926	tRNA wobble base 5-methoxycarbonylmethyl-2-thiouridinylation	0	1	1	1	0.33261	0.903657	-	gene1377(YALI0_B12628g)
BP	GO:0002939	tRNA N1-guanine methylation	0	1	1	1	0.33261	0.903657	-	gene3150(YALI0_D05489g)
BP	GO:0002940	tRNA N2-guanine methylation	0	1	1	1	0.33261	0.903657	-	gene5456(YALI0_E30723g)
BP	GO:0005987	sucrose catabolic process	1	0	1	1	0.33261	0.903657	gene5273(YALI0_E26719g)	-
BP	GO:0005997	xylulose metabolic process	1	0	1	1	0.33261	0.903657	gene6150(YALI0_F10923g)	-
BP	GO:0006024	glycosaminoglycan biosynthetic process	1	0	1	1	0.33261	0.903657	gene3016(YALI0_D02321g)	-
BP	GO:0006026	aminoglycan catabolic process	1	0	1	1	0.33261	0.903657	gene5865(YALI0_F04532g)	-
BP	GO:0006032	chitin catabolic process	1	0	1	1	0.33261	0.903657	gene5865(YALI0_F04532g)	-
BP	GO:0006041	glucosamine metabolic process	1	0	1	1	0.33261	0.903657	gene1927(YALI0_C01419g)	-
BP	GO:0006043	glucosamine catabolic process	1	0	1	1	0.33261	0.903657	gene1927(YALI0_C01419g)	-
BP	GO:0006054	N-acetylneuraminate metabolic process	1	0	1	1	0.33261	0.903657	gene1927(YALI0_C01419g)	-
BP	GO:0006059	hexitol metabolic process	0	1	1	1	0.33261	0.903657	-	gene1536(YALI0_B16192g)
BP	GO:0006107	oxaloacetate metabolic process	1	0	1	1	0.33261	0.903657	gene1153(YALI0_B07359g)	-
BP	GO:0006147	guanine catabolic process	1	0	1	1	0.33261	0.903657	gene5227(YALI0_E25740g)	-
BP	GO:0006208	pyrimidine nucleobase catabolic process	1	0	1	1	0.33261	0.903657	gene1945(YALI0_C01859g)	-
BP	GO:0006210	thymine catabolic process	1	0	1	1	0.33261	0.903657	gene1945(YALI0_C01859g)	-
BP	GO:0006274	DNA replication termination	1	0	1	1	0.33261	0.903657	gene5946(YALI0_F06270g)	-
BP	GO:0006309	apoptotic DNA fragmentation	0	1	1	1	0.33261	0.903657	-	gene3131(YALI0_D05071g)
BP	GO:0006362	transcription elongation from RNA polymerase I promoter	0	1	1	1	0.33261	0.903657	-	gene4326(YALI0_E05225g)
BP	GO:0006363	termination of RNA polymerase I transcription	0	1	1	1	0.33261	0.903657	-	gene321(YALI0_A08151g)
BP	GO:0006391	transcription initiation from mitochondrial promoter	0	1	1	1	0.33261	0.903657	-	gene928(YALI0_B01980g)
BP	GO:0006420	arginyl-tRNA aminoacylation	0	1	1	1	0.33261	0.903657	-	gene4880(YALI0_E17985g)
BP	GO:0006427	histidyl-tRNA aminoacylation	0	1	1	1	0.33261	0.903657	-	gene4673(YALI0_E13123g)
BP	GO:0006471	protein ADP-ribosylation	1	0	1	1	0.33261	0.903657	gene2591(YALI0_C17061g)	-
BP	GO:0006507	GPI anchor release	0	1	1	1	0.33261	0.903657	-	gene1526(YALI0_B15972g)
BP	GO:0006532	aspartate biosynthetic process	1	0	1	1	0.33261	0.903657	gene6963(YALI0_F29337g)	-
BP	GO:0006554	lysine catabolic process	1	0	1	1	0.33261	0.903657	gene4340(YALI0_E05533g)	-
BP	GO:0006559	L-phenylalanine catabolic process	1	0	1	1	0.33261	0.903657	gene1793(YALI0_B21846g)	-
BP	GO:0006572	tyrosine catabolic process	1	0	1	1	0.33261	0.903657	gene1793(YALI0_B21846g)	-
BP	GO:0006598	polyamine catabolic process	1	0	1	1	0.33261	0.903657	gene3493(YALI0_D13024g)	-
BP	GO:0006617	SRP-dependent cotranslational protein targeting to membrane, signal sequence recognition	0	1	1	1	0.33261	0.903657	-	gene6626(YALI0_F21505g)
BP	GO:0006684	sphingomyelin metabolic process	1	0	1	1	0.33261	0.903657	gene643(YALI0_A16610g)	-
BP	GO:0006685	sphingomyelin catabolic process	1	0	1	1	0.33261	0.903657	gene643(YALI0_A16610g)	-
BP	GO:0006740	NADPH regeneration	1	0	1	1	0.33261	0.903657	gene3388(YALI0_D10659g)	-
BP	GO:0006761	dihydrofolate biosynthetic process	0	1	1	1	0.33261	0.903657	-	gene396(YALI0_A10032g)
BP	GO:0006784	heme a biosynthetic process	0	1	1	1	0.33261	0.903657	-	gene6762(YALI0_F24651g)
BP	GO:0006798	polyphosphate catabolic process	0	1	1	1	0.33261	0.903657	-	gene1538(YALI0_B16236g)
BP	GO:0006805	xenobiotic metabolic process	1	0	1	1	0.33261	0.903657	gene4905(YALI0_E18568g)	-
BP	GO:0006864	pyrimidine nucleotide transport	0	1	1	1	0.33261	0.903657	-	gene5908(YALI0_F05500g)
BP	GO:0006921	cellular component disassembly involved in execution phase of apoptosis	0	1	1	1	0.33261	0.903657	-	gene3131(YALI0_D05071g)
BP	GO:0007166	cell surface receptor signaling pathway	0	1	1	1	0.33261	0.903657	-	gene4641(YALI0_E12375g)
BP	GO:0007167	enzyme linked receptor protein signaling pathway	0	1	1	1	0.33261	0.903657	-	gene4641(YALI0_E12375g)
BP	GO:0007169	transmembrane receptor protein tyrosine kinase signaling pathway	0	1	1	1	0.33261	0.903657	-	gene4641(YALI0_E12375g)
BP	GO:0007530	sex determination	1	0	1	1	0.33261	0.903657	gene5946(YALI0_F06270g)	-
BP	GO:0007531	mating type determination	1	0	1	1	0.33261	0.903657	gene5946(YALI0_F06270g)	-
BP	GO:0007533	mating type switching	1	0	1	1	0.33261	0.903657	gene5946(YALI0_F06270g)	-
BP	GO:0007568	aging	0	1	1	1	0.33261	0.903657	-	gene3077(YALI0_D03888g)
BP	GO:0007569	cell aging	0	1	1	1	0.33261	0.903657	-	gene3077(YALI0_D03888g)
BP	GO:0007623	circadian rhythm	0	1	1	1	0.33261	0.903657	-	gene1413(YALI0_B13486g)
BP	GO:0008277	regulation of G-protein coupled receptor protein signaling pathway	1	0	1	1	0.33261	0.903657	gene5700(YALI0_F00858g)	-
BP	GO:0008286	insulin receptor signaling pathway	0	1	1	1	0.33261	0.903657	-	gene4641(YALI0_E12375g)
BP	GO:0008630	intrinsic apoptotic signaling pathway in response to DNA damage	0	1	1	1	0.33261	0.903657	-	gene3077(YALI0_D03888g)
BP	GO:0009229	thiamine diphosphate biosynthetic process	1	0	1	1	0.33261	0.903657	gene5029(YALI0_E21351g)	-
BP	GO:0009304	tRNA transcription	0	1	1	1	0.33261	0.903657	-	gene1048(YALI0_B04851g)
BP	GO:0009403	toxin biosynthetic process	1	0	1	1	0.33261	0.903657	gene1071(YALI0_B05434g)	-
BP	GO:0009404	toxin metabolic process	1	0	1	1	0.33261	0.903657	gene1071(YALI0_B05434g)	-
BP	GO:0009410	response to xenobiotic stimulus	1	0	1	1	0.33261	0.903657	gene4905(YALI0_E18568g)	-
BP	GO:0009690	cytokinin metabolic process	1	0	1	1	0.33261	0.903657	gene3662(YALI0_D17182g)	-
BP	GO:0009691	cytokinin biosynthetic process	1	0	1	1	0.33261	0.903657	gene3662(YALI0_D17182g)	-
BP	GO:0009725	response to hormone	0	1	1	1	0.33261	0.903657	-	gene4641(YALI0_E12375g)
BP	GO:0009790	embryo development	0	1	1	1	0.33261	0.903657	-	gene1647(YALI0_B18612g)
BP	GO:0009914	hormone transport	0	1	1	1	0.33261	0.903657	-	gene4360(YALI0_E05973g)
BP	GO:0010032	meiotic chromosome condensation	0	1	1	1	0.33261	0.903657	-	gene5953(YALI0_F06402g)
BP	GO:0010037	response to carbon dioxide	0	1	1	1	0.33261	0.903657	-	gene6621(YALI0_F21406g)
BP	GO:0010038	response to metal ion	1	0	1	1	0.33261	0.903657	gene4337(YALI0_E05467g)	-
BP	GO:0010121	arginine catabolic process to proline via ornithine	1	0	1	1	0.33261	0.903657	gene2057(YALI0_C04433g)	-
BP	GO:0010124	phenylacetate catabolic process	1	0	1	1	0.33261	0.903657	gene4905(YALI0_E18568g)	-
BP	GO:0010453	regulation of cell fate commitment	1	0	1	1	0.33261	0.903657	gene5946(YALI0_F06270g)	-
BP	GO:0010509	polyamine homeostasis	0	1	1	1	0.33261	0.903657	-	gene5794(YALI0_F02959g)
BP	GO:0010569	regulation of double-strand break repair via homologous recombination	0	1	1	1	0.33261	0.903657	-	gene3645(YALI0_D16841g)
BP	GO:0010792	DNA double-strand break processing involved in repair via single-strand annealing	1	0	1	1	0.33261	0.903657	gene2884(YALI0_C23727g)	-
BP	GO:0010822	positive regulation of mitochondrion organization	0	1	1	1	0.33261	0.903657	-	gene4852(YALI0_E17369g)
BP	GO:0010969	regulation of pheromone-dependent signal transduction involved in conjugation with cellular fusion	1	0	1	1	0.33261	0.903657	gene5700(YALI0_F00858g)	-
BP	GO:0010992	ubiquitin recycling	1	0	1	1	0.33261	0.903657	gene3411(YALI0_D11132g)	-
BP	GO:0015699	antimonite transport	1	0	1	1	0.33261	0.903657	gene2195(YALI0_C07590g)	-
BP	GO:0015700	arsenite transport	1	0	1	1	0.33261	0.903657	gene2195(YALI0_C07590g)	-
BP	GO:0015709	thiosulfate transport	1	0	1	1	0.33261	0.903657	gene984(YALI0_B03344g)	-
BP	GO:0015729	oxaloacetate transport	1	0	1	1	0.33261	0.903657	gene984(YALI0_B03344g)	-
BP	GO:0015742	alpha-ketoglutarate transport	0	1	1	1	0.33261	0.903657	-	gene1294(YALI0_B10736g)
BP	GO:0015743	malate transport	1	0	1	1	0.33261	0.903657	gene984(YALI0_B03344g)	-
BP	GO:0015805	S-adenosyl-L-methionine transport	0	1	1	1	0.33261	0.903657	-	gene2680(YALI0_C19195g)
BP	GO:0015816	glycine transport	0	1	1	1	0.33261	0.903657	-	gene4501(YALI0_E09284g)
BP	GO:0015855	pyrimidine nucleobase transport	1	0	1	1	0.33261	0.903657	gene7016(YALI0_F30569g)	-
BP	GO:0015856	cytosine transport	1	0	1	1	0.33261	0.903657	gene7016(YALI0_F30569g)	-
BP	GO:0015876	acetyl-CoA transport	1	0	1	1	0.33261	0.903657	gene5284(YALI0_E26983g)	-
BP	GO:0015878	biotin transport	0	1	1	1	0.33261	0.903657	-	gene2293(YALI0_C09823g)
BP	GO:0015884	folic acid transport	0	1	1	1	0.33261	0.903657	-	gene652(YALI0_A16863g)
BP	GO:0015887	pantothenate transmembrane transport	0	1	1	1	0.33261	0.903657	-	gene5975(YALI0_F06842g)
BP	GO:0015909	long-chain fatty acid transport	1	0	1	1	0.33261	0.903657	gene4795(YALI0_E16016g)	-
BP	GO:0015916	fatty-acyl-CoA transport	1	0	1	1	0.33261	0.903657	gene5284(YALI0_E26983g)	-
BP	GO:0015976	carbon utilization	0	1	1	1	0.33261	0.903657	-	gene6621(YALI0_F21406g)
BP	GO:0016024	CDP-diacylglycerol biosynthetic process	0	1	1	1	0.33261	0.903657	-	gene4729(YALI0_E14443g)
BP	GO:0016031	tRNA import into mitochondrion	0	1	1	1	0.33261	0.903657	-	gene278(YALI0_A07084g)
BP	GO:0016076	snRNA catabolic process	0	1	1	1	0.33261	0.903657	-	gene4291(YALI0_E04444g)
BP	GO:0016077	snoRNA catabolic process	0	1	1	1	0.33261	0.903657	-	gene4291(YALI0_E04444g)
BP	GO:0016266	O-glycan processing	1	0	1	1	0.33261	0.903657	gene6710(YALI0_F23485g)	-
BP	GO:0016267	O-glycan processing, core 1	1	0	1	1	0.33261	0.903657	gene6710(YALI0_F23485g)	-
BP	GO:0016480	negative regulation of transcription from RNA polymerase III promoter	1	0	1	1	0.33261	0.903657	gene6135(YALI0_F10541g)	-
BP	GO:0016598	protein arginylation	0	1	1	1	0.33261	0.903657	-	gene4266(YALI0_E03894g)
BP	GO:0018002	N-terminal peptidyl-glutamic acid acetylation	0	1	1	1	0.33261	0.903657	-	gene1084(YALI0_B05742g)
BP	GO:0018106	peptidyl-histidine phosphorylation	1	0	1	1	0.33261	0.903657	gene6059(YALI0_F08789g)	-
BP	GO:0018131	oxazole or thiazole biosynthetic process	0	1	1	1	0.33261	0.903657	-	gene384(YALI0_A09768g)
BP	GO:0018160	peptidyl-pyrromethane cofactor linkage	0	1	1	1	0.33261	0.903657	-	gene6849(YALI0_F26609g)
BP	GO:0018192	enzyme active site formation via cysteine modification to L-cysteine persulfide	0	1	1	1	0.33261	0.903657	-	gene2631(YALI0_C18095g)
BP	GO:0018200	peptidyl-glutamic acid modification	0	1	1	1	0.33261	0.903657	-	gene1084(YALI0_B05742g)
BP	GO:0018307	enzyme active site formation	0	1	1	1	0.33261	0.903657	-	gene2631(YALI0_C18095g)
BP	GO:0019262	N-acetylneuraminate catabolic process	1	0	1	1	0.33261	0.903657	gene1927(YALI0_C01419g)	-
BP	GO:0019357	nicotinate nucleotide biosynthetic process	1	0	1	1	0.33261	0.903657	gene852(YALI0_B00220g)	-
BP	GO:0019365	pyridine nucleotide salvage	1	0	1	1	0.33261	0.903657	gene852(YALI0_B00220g)	-
BP	GO:0019427	acetyl-CoA biosynthetic process from acetate	0	1	1	1	0.33261	0.903657	-	gene5930(YALI0_F05962g)
BP	GO:0019473	L-lysine catabolic process to glutarate, by acetylation	1	0	1	1	0.33261	0.903657	gene4340(YALI0_E05533g)	-
BP	GO:0019477	L-lysine catabolic process	1	0	1	1	0.33261	0.903657	gene4340(YALI0_E05533g)	-
BP	GO:0019493	arginine catabolic process to proline	1	0	1	1	0.33261	0.903657	gene2057(YALI0_C04433g)	-
BP	GO:0019544	arginine catabolic process to glutamate	1	0	1	1	0.33261	0.903657	gene2057(YALI0_C04433g)	-
BP	GO:0019547	arginine catabolic process to ornithine	1	0	1	1	0.33261	0.903657	gene4425(YALI0_E07535g)	-
BP	GO:0019551	glutamate catabolic process to 2-oxoglutarate	1	0	1	1	0.33261	0.903657	gene4513(YALI0_E09603g)	-
BP	GO:0019594	mannitol metabolic process	0	1	1	1	0.33261	0.903657	-	gene1536(YALI0_B16192g)
BP	GO:0019628	urate catabolic process	1	0	1	1	0.33261	0.903657	gene6079(YALI0_F09251g)	-
BP	GO:0019676	ammonia assimilation cycle	1	0	1	1	0.33261	0.903657	gene1706(YALI0_B19998g)	-
BP	GO:0019679	propionate metabolic process, methylcitrate cycle	0	1	1	1	0.33261	0.903657	-	gene5467(YALI0_E30965g)
BP	GO:0019859	thymine metabolic process	1	0	1	1	0.33261	0.903657	gene1945(YALI0_C01859g)	-
BP	GO:0019933	cAMP-mediated signaling	1	0	1	1	0.33261	0.903657	gene316(YALI0_A08041g)	-
BP	GO:0023058	adaptation of signaling pathway	1	0	1	1	0.33261	0.903657	gene5700(YALI0_F00858g)	-
BP	GO:0030174	regulation of DNA-dependent DNA replication initiation	0	1	1	1	0.33261	0.903657	-	gene3532(YALI0_D13948g)
BP	GO:0030243	cellulose metabolic process	1	0	1	1	0.33261	0.903657	gene5737(YALI0_F01672g)	-
BP	GO:0030245	cellulose catabolic process	1	0	1	1	0.33261	0.903657	gene5737(YALI0_F01672g)	-
BP	GO:0030259	lipid glycosylation	1	0	1	1	0.33261	0.903657	gene3715(YALI0_D18403g)	-
BP	GO:0030262	apoptotic nuclear changes	0	1	1	1	0.33261	0.903657	-	gene3131(YALI0_D05071g)
BP	GO:0030397	membrane disassembly	1	0	1	1	0.33261	0.903657	gene5950(YALI0_F06358g)	-
BP	GO:0030437	ascospore formation	1	0	1	1	0.33261	0.903657	gene7028(YALI0_F30833g)	-
BP	GO:0030476	ascospore wall assembly	1	0	1	1	0.33261	0.903657	gene7028(YALI0_F30833g)	-
BP	GO:0031494	regulation of mating type switching	1	0	1	1	0.33261	0.903657	gene5946(YALI0_F06270g)	-
BP	GO:0031532	actin cytoskeleton reorganization	1	0	1	1	0.33261	0.903657	gene5709(YALI0_F01056g)	-
BP	GO:0031919	vitamin B6 transport	0	1	1	1	0.33261	0.903657	-	gene3235(YALI0_D07392g)
BP	GO:0031930	mitochondria-nucleus signaling pathway	1	0	1	1	0.33261	0.903657	gene3950(YALI0_D23925g)	-
BP	GO:0032091	negative regulation of protein binding	1	0	1	1	0.33261	0.903657	gene9(YALI0_A00330g)	-
BP	GO:0032101	regulation of response to external stimulus	1	0	1	1	0.33261	0.903657	gene5318(YALI0_E27742g)	-
BP	GO:0032103	positive regulation of response to external stimulus	1	0	1	1	0.33261	0.903657	gene5318(YALI0_E27742g)	-
BP	GO:0032104	regulation of response to extracellular stimulus	1	0	1	1	0.33261	0.903657	gene5318(YALI0_E27742g)	-
BP	GO:0032106	positive regulation of response to extracellular stimulus	1	0	1	1	0.33261	0.903657	gene5318(YALI0_E27742g)	-
BP	GO:0032107	regulation of response to nutrient levels	1	0	1	1	0.33261	0.903657	gene5318(YALI0_E27742g)	-
BP	GO:0032109	positive regulation of response to nutrient levels	1	0	1	1	0.33261	0.903657	gene5318(YALI0_E27742g)	-
BP	GO:0032868	response to insulin	0	1	1	1	0.33261	0.903657	-	gene4641(YALI0_E12375g)
BP	GO:0032869	cellular response to insulin stimulus	0	1	1	1	0.33261	0.903657	-	gene4641(YALI0_E12375g)
BP	GO:0032870	cellular response to hormone stimulus	0	1	1	1	0.33261	0.903657	-	gene4641(YALI0_E12375g)
BP	GO:0032957	inositol trisphosphate metabolic process	1	0	1	1	0.33261	0.903657	gene2046(YALI0_C04180g)	-
BP	GO:0032959	inositol trisphosphate biosynthetic process	1	0	1	1	0.33261	0.903657	gene2046(YALI0_C04180g)	-
BP	GO:0033120	positive regulation of RNA splicing	0	1	1	1	0.33261	0.903657	-	gene6953(YALI0_F29073g)
BP	GO:0033173	calcineurin-NFAT signaling cascade	1	0	1	1	0.33261	0.903657	gene4533(YALI0_E10043g)	-
BP	GO:0033477	S-methylmethionine metabolic process	0	1	1	1	0.33261	0.903657	-	gene6805(YALI0_F25641g)
BP	GO:0033528	S-methylmethionine cycle	0	1	1	1	0.33261	0.903657	-	gene6805(YALI0_F25641g)
BP	GO:0034293	sexual sporulation	1	0	1	1	0.33261	0.903657	gene7028(YALI0_F30833g)	-
BP	GO:0034355	NAD salvage	1	0	1	1	0.33261	0.903657	gene852(YALI0_B00220g)	-
BP	GO:0034367	macromolecular complex remodeling	0	1	1	1	0.33261	0.903657	-	gene6838(YALI0_F26367g)
BP	GO:0034414	tRNA 3'-trailer cleavage, endonucleolytic	0	1	1	1	0.33261	0.903657	-	gene509(YALI0_A13057g)
BP	GO:0034462	small-subunit processome assembly	0	1	1	1	0.33261	0.903657	-	gene1016(YALI0_B04136g)
BP	GO:0034488	basic amino acid transmembrane export from vacuole	1	0	1	1	0.33261	0.903657	gene3004(YALI0_D02046g)	-
BP	GO:0034496	multivesicular body membrane disassembly	1	0	1	1	0.33261	0.903657	gene5950(YALI0_F06358g)	-
BP	GO:0034498	early endosome to Golgi transport	0	1	1	1	0.33261	0.903657	-	gene1832(YALI0_B22726g)
BP	GO:0034754	cellular hormone metabolic process	1	0	1	1	0.33261	0.903657	gene3662(YALI0_D17182g)	-
BP	GO:0035511	oxidative DNA demethylation	1	0	1	1	0.33261	0.903657	gene3243(YALI0_D07546g)	-
BP	GO:0035552	oxidative single-stranded DNA demethylation	1	0	1	1	0.33261	0.903657	gene3243(YALI0_D07546g)	-
BP	GO:0035927	RNA import into mitochondrion	0	1	1	1	0.33261	0.903657	-	gene278(YALI0_A07084g)
BP	GO:0036046	protein demalonylation	0	1	1	1	0.33261	0.903657	-	gene3815(YALI0_D20724g)
BP	GO:0036047	peptidyl-lysine demalonylation	0	1	1	1	0.33261	0.903657	-	gene3815(YALI0_D20724g)
BP	GO:0036048	protein desuccinylation	0	1	1	1	0.33261	0.903657	-	gene3815(YALI0_D20724g)
BP	GO:0036049	peptidyl-lysine desuccinylation	0	1	1	1	0.33261	0.903657	-	gene3815(YALI0_D20724g)
BP	GO:0036257	multivesicular body organization	1	0	1	1	0.33261	0.903657	gene5950(YALI0_F06358g)	-
BP	GO:0036261	7-methylguanosine cap hypermethylation	0	1	1	1	0.33261	0.903657	-	gene1044(YALI0_B04774g)
BP	GO:0036293	response to decreased oxygen levels	0	1	1	1	0.33261	0.903657	-	gene3871(YALI0_D22132g)
BP	GO:0036294	cellular response to decreased oxygen levels	0	1	1	1	0.33261	0.903657	-	gene3871(YALI0_D22132g)
BP	GO:0042126	nitrate metabolic process	0	1	1	1	0.33261	0.903657	-	gene1996(YALI0_C03069g)
BP	GO:0042128	nitrate assimilation	0	1	1	1	0.33261	0.903657	-	gene1996(YALI0_C03069g)
BP	GO:0042178	xenobiotic catabolic process	1	0	1	1	0.33261	0.903657	gene4905(YALI0_E18568g)	-
BP	GO:0042244	spore wall assembly	1	0	1	1	0.33261	0.903657	gene7028(YALI0_F30833g)	-
BP	GO:0042357	thiamine diphosphate metabolic process	1	0	1	1	0.33261	0.903657	gene5029(YALI0_E21351g)	-
BP	GO:0042439	ethanolamine-containing compound metabolic process	0	1	1	1	0.33261	0.903657	-	gene1660(YALI0_B18876g)
BP	GO:0042445	hormone metabolic process	1	0	1	1	0.33261	0.903657	gene3662(YALI0_D17182g)	-
BP	GO:0042446	hormone biosynthetic process	1	0	1	1	0.33261	0.903657	gene3662(YALI0_D17182g)	-
BP	GO:0042732	D-xylose metabolic process	1	0	1	1	0.33261	0.903657	gene6150(YALI0_F10923g)	-
BP	GO:0042759	long-chain fatty acid biosynthetic process	0	1	1	1	0.33261	0.903657	-	gene1682(YALI0_B19382g)
BP	GO:0042797	tRNA transcription from RNA polymerase III promoter	0	1	1	1	0.33261	0.903657	-	gene1048(YALI0_B04851g)
BP	GO:0042866	pyruvate biosynthetic process	1	0	1	1	0.33261	0.903657	gene1681(YALI0_B19360g)	-
BP	GO:0042868	antisense RNA metabolic process	0	1	1	1	0.33261	0.903657	-	gene4291(YALI0_E04444g)
BP	GO:0043007	maintenance of rDNA	0	1	1	1	0.33261	0.903657	-	gene3307(YALI0_D08932g)
BP	GO:0043048	dolichyl monophosphate biosynthetic process	1	0	1	1	0.33261	0.903657	gene4922(YALI0_E18942g)	-
BP	GO:0043385	mycotoxin metabolic process	1	0	1	1	0.33261	0.903657	gene1071(YALI0_B05434g)	-
BP	GO:0043386	mycotoxin biosynthetic process	1	0	1	1	0.33261	0.903657	gene1071(YALI0_B05434g)	-
BP	GO:0043393	regulation of protein binding	1	0	1	1	0.33261	0.903657	gene9(YALI0_A00330g)	-
BP	GO:0043434	response to peptide hormone	0	1	1	1	0.33261	0.903657	-	gene4641(YALI0_E12375g)
BP	GO:0043489	RNA stabilization	0	1	1	1	0.33261	0.903657	-	gene4167(YALI0_E01672g)
BP	GO:0043491	protein kinase B signaling	1	0	1	1	0.33261	0.903657	gene5709(YALI0_F01056g)	-
BP	GO:0043504	mitochondrial DNA repair	0	1	1	1	0.33261	0.903657	-	gene1270(YALI0_B10197g)
BP	GO:0043619	regulation of transcription from RNA polymerase II promoter in response to oxidative stress	0	1	1	1	0.33261	0.903657	-	gene5447(YALI0_E30547g)
BP	GO:0043935	sexual sporulation resulting in formation of a cellular spore	1	0	1	1	0.33261	0.903657	gene7028(YALI0_F30833g)	-
BP	GO:0044539	long-chain fatty acid import	1	0	1	1	0.33261	0.903657	gene4795(YALI0_E16016g)	-
BP	GO:0044782	cilium organization	1	0	1	1	0.33261	0.903657	gene1794(YALI0_B21868g)	-
BP	GO:0045022	early endosome to late endosome transport	1	0	1	1	0.33261	0.903657	gene4907(YALI0_E18612g)	-
BP	GO:0045165	cell fate commitment	1	0	1	1	0.33261	0.903657	gene5946(YALI0_F06270g)	-
BP	GO:0045595	regulation of cell differentiation	1	0	1	1	0.33261	0.903657	gene5946(YALI0_F06270g)	-
BP	GO:0045951	positive regulation of mitotic recombination	0	1	1	1	0.33261	0.903657	-	gene6592(YALI0_F20746g)
BP	GO:0045991	carbon catabolite activation of transcription	1	0	1	1	0.33261	0.903657	gene2267(YALI0_C09232g)	-
BP	GO:0046016	positive regulation of transcription by glucose	1	0	1	1	0.33261	0.903657	gene2267(YALI0_C09232g)	-
BP	GO:0046098	guanine metabolic process	1	0	1	1	0.33261	0.903657	gene5227(YALI0_E25740g)	-
BP	GO:0046160	heme a metabolic process	0	1	1	1	0.33261	0.903657	-	gene6762(YALI0_F24651g)
BP	GO:0046341	CDP-diacylglycerol metabolic process	0	1	1	1	0.33261	0.903657	-	gene4729(YALI0_E14443g)
BP	GO:0046415	urate metabolic process	1	0	1	1	0.33261	0.903657	gene6079(YALI0_F09251g)	-
BP	GO:0046437	D-amino acid biosynthetic process	1	0	1	1	0.33261	0.903657	gene1681(YALI0_B19360g)	-
BP	GO:0046440	L-lysine metabolic process	1	0	1	1	0.33261	0.903657	gene4340(YALI0_E05533g)	-
BP	GO:0046484	oxazole or thiazole metabolic process	0	1	1	1	0.33261	0.903657	-	gene384(YALI0_A09768g)
BP	GO:0046497	nicotinate nucleotide metabolic process	1	0	1	1	0.33261	0.903657	gene852(YALI0_B00220g)	-
BP	GO:0046626	regulation of insulin receptor signaling pathway	0	1	1	1	0.33261	0.903657	-	gene4641(YALI0_E12375g)
BP	GO:0046627	negative regulation of insulin receptor signaling pathway	0	1	1	1	0.33261	0.903657	-	gene4641(YALI0_E12375g)
BP	GO:0046951	ketone body biosynthetic process	1	0	1	1	0.33261	0.903657	gene1824(YALI0_B22550g)	-
BP	GO:0046952	ketone body catabolic process	1	0	1	1	0.33261	0.903657	gene6848(YALI0_F26587g)	-
BP	GO:0048016	inositol phosphate-mediated signaling	1	0	1	1	0.33261	0.903657	gene4533(YALI0_E10043g)	-
BP	GO:0048033	heme o metabolic process	0	1	1	1	0.33261	0.903657	-	gene6721(YALI0_F23727g)
BP	GO:0048034	heme O biosynthetic process	0	1	1	1	0.33261	0.903657	-	gene6721(YALI0_F23727g)
BP	GO:0048250	mitochondrial iron ion transport	0	1	1	1	0.33261	0.903657	-	gene1781(YALI0_B21604g)
BP	GO:0048255	mRNA stabilization	0	1	1	1	0.33261	0.903657	-	gene4167(YALI0_E01672g)
BP	GO:0048312	intracellular distribution of mitochondria	0	1	1	1	0.33261	0.903657	-	gene1656(YALI0_B18810g)
BP	GO:0048511	rhythmic process	0	1	1	1	0.33261	0.903657	-	gene1413(YALI0_B13486g)
BP	GO:0048513	animal organ development	0	1	1	1	0.33261	0.903657	-	gene1647(YALI0_B18612g)
BP	GO:0048568	embryonic organ development	0	1	1	1	0.33261	0.903657	-	gene1647(YALI0_B18612g)
BP	GO:0050848	regulation of calcium-mediated signaling	1	0	1	1	0.33261	0.903657	gene4533(YALI0_E10043g)	-
BP	GO:0051013	microtubule severing	1	0	1	1	0.33261	0.903657	gene1743(YALI0_B20834g)	-
BP	GO:0051100	negative regulation of binding	1	0	1	1	0.33261	0.903657	gene9(YALI0_A00330g)	-
BP	GO:0051228	mitotic spindle disassembly	1	0	1	1	0.33261	0.903657	gene6206(YALI0_F12155g)	-
BP	GO:0051230	spindle disassembly	1	0	1	1	0.33261	0.903657	gene6206(YALI0_F12155g)	-
BP	GO:0051275	beta-glucan catabolic process	1	0	1	1	0.33261	0.903657	gene5737(YALI0_F01672g)	-
BP	GO:0051391	tRNA acetylation	0	1	1	1	0.33261	0.903657	-	gene1470(YALI0_B14751g)
BP	GO:0051639	actin filament network formation	1	0	1	1	0.33261	0.903657	gene1602(YALI0_B17622g)	-
BP	GO:0051865	protein autoubiquitination	0	1	1	1	0.33261	0.903657	-	gene3429(YALI0_D11528g)
BP	GO:0051896	regulation of protein kinase B signaling	1	0	1	1	0.33261	0.903657	gene5709(YALI0_F01056g)	-
BP	GO:0051897	positive regulation of protein kinase B signaling	1	0	1	1	0.33261	0.903657	gene5709(YALI0_F01056g)	-
BP	GO:0051973	positive regulation of telomerase activity	0	1	1	1	0.33261	0.903657	-	gene6617(YALI0_F21329g)
BP	GO:0052837	thiazole biosynthetic process	0	1	1	1	0.33261	0.903657	-	gene384(YALI0_A09768g)
BP	GO:0052838	thiazole metabolic process	0	1	1	1	0.33261	0.903657	-	gene384(YALI0_A09768g)
BP	GO:0055091	phospholipid homeostasis	1	0	1	1	0.33261	0.903657	gene4105(YALI0_E00330g)	-
BP	GO:0060238	regulation of signal transduction involved in conjugation with cellular fusion	1	0	1	1	0.33261	0.903657	gene5700(YALI0_F00858g)	-
BP	GO:0060271	cilium assembly	1	0	1	1	0.33261	0.903657	gene1794(YALI0_B21868g)	-
BP	GO:0060962	regulation of ribosomal protein gene transcription from RNA polymerase II promoter	0	1	1	1	0.33261	0.903657	-	gene5279(YALI0_E26873g)
BP	GO:0061504	cyclic threonylcarbamoyladenosine biosynthetic process	0	1	1	1	0.33261	0.903657	-	gene6549(YALI0_F19800g)
BP	GO:0061709	reticulophagy	1	0	1	1	0.33261	0.903657	gene1036(YALI0_B04598g)	-
BP	GO:0061723	glycophagy	1	0	1	1	0.33261	0.903657	gene1036(YALI0_B04598g)	-
BP	GO:0070126	mitochondrial translational termination	0	1	1	1	0.33261	0.903657	-	gene5091(YALI0_E22759g)
BP	GO:0070154	mitochondrial lysyl-tRNA aminoacylation	0	1	1	1	0.33261	0.903657	-	gene3936(YALI0_D23639g)
BP	GO:0070158	mitochondrial seryl-tRNA aminoacylation	0	1	1	1	0.33261	0.903657	-	gene1092(YALI0_B05918g)
BP	GO:0070159	mitochondrial threonyl-tRNA aminoacylation	0	1	1	1	0.33261	0.903657	-	gene369(YALI0_A09427g)
BP	GO:0070179	D-serine biosynthetic process	1	0	1	1	0.33261	0.903657	gene1681(YALI0_B19360g)	-
BP	GO:0070183	mitochondrial tryptophanyl-tRNA aminoacylation	0	1	1	1	0.33261	0.903657	-	gene2645(YALI0_C18425g)
BP	GO:0070212	protein poly-ADP-ribosylation	1	0	1	1	0.33261	0.903657	gene2591(YALI0_C17061g)	-
BP	GO:0070291	N-acylethanolamine metabolic process	0	1	1	1	0.33261	0.903657	-	gene1660(YALI0_B18876g)
BP	GO:0070292	N-acylphosphatidylethanolamine metabolic process	0	1	1	1	0.33261	0.903657	-	gene1660(YALI0_B18876g)
BP	GO:0070371	ERK1 and ERK2 cascade	1	0	1	1	0.33261	0.903657	gene9(YALI0_A00330g)	-
BP	GO:0070372	regulation of ERK1 and ERK2 cascade	1	0	1	1	0.33261	0.903657	gene9(YALI0_A00330g)	-
BP	GO:0070482	response to oxygen levels	0	1	1	1	0.33261	0.903657	-	gene3871(YALI0_D22132g)
BP	GO:0070590	spore wall biogenesis	1	0	1	1	0.33261	0.903657	gene7028(YALI0_F30833g)	-
BP	GO:0070591	ascospore wall biogenesis	1	0	1	1	0.33261	0.903657	gene7028(YALI0_F30833g)	-
BP	GO:0070650	actin filament bundle distribution	0	1	1	1	0.33261	0.903657	-	gene6007(YALI0_F07601g)
BP	GO:0070726	cell wall assembly	1	0	1	1	0.33261	0.903657	gene7028(YALI0_F30833g)	-
BP	GO:0070884	regulation of calcineurin-NFAT signaling cascade	1	0	1	1	0.33261	0.903657	gene4533(YALI0_E10043g)	-
BP	GO:0070899	mitochondrial tRNA wobble uridine modification	0	1	1	1	0.33261	0.903657	-	gene4402(YALI0_E06941g)
BP	GO:0070901	mitochondrial tRNA methylation	0	1	1	1	0.33261	0.903657	-	gene3150(YALI0_D05489g)
BP	GO:0070989	oxidative demethylation	1	0	1	1	0.33261	0.903657	gene3243(YALI0_D07546g)	-
BP	GO:0071036	nuclear polyadenylation-dependent snoRNA catabolic process	0	1	1	1	0.33261	0.903657	-	gene4291(YALI0_E04444g)
BP	GO:0071037	nuclear polyadenylation-dependent snRNA catabolic process	0	1	1	1	0.33261	0.903657	-	gene4291(YALI0_E04444g)
BP	GO:0071039	nuclear polyadenylation-dependent CUT catabolic process	0	1	1	1	0.33261	0.903657	-	gene4291(YALI0_E04444g)
BP	GO:0071040	nuclear polyadenylation-dependent antisense transcript catabolic process	0	1	1	1	0.33261	0.903657	-	gene4291(YALI0_E04444g)
BP	GO:0071041	antisense RNA transcript catabolic process	0	1	1	1	0.33261	0.903657	-	gene4291(YALI0_E04444g)
BP	GO:0071108	protein K48-linked deubiquitination	1	0	1	1	0.33261	0.903657	gene4708(YALI0_E13970g)	-
BP	GO:0071170	site-specific DNA replication termination	1	0	1	1	0.33261	0.903657	gene5946(YALI0_F06270g)	-
BP	GO:0071171	site-specific DNA replication termination at RTS1 barrier	1	0	1	1	0.33261	0.903657	gene5946(YALI0_F06270g)	-
BP	GO:0071241	cellular response to inorganic substance	0	1	1	1	0.33261	0.903657	-	gene6621(YALI0_F21406g)
BP	GO:0071244	cellular response to carbon dioxide	0	1	1	1	0.33261	0.903657	-	gene6621(YALI0_F21406g)
BP	GO:0071266	'de novo' L-methionine biosynthetic process	1	0	1	1	0.33261	0.903657	gene2942(YALI0_D00605g)	-
BP	GO:0071375	cellular response to peptide hormone stimulus	0	1	1	1	0.33261	0.903657	-	gene4641(YALI0_E12375g)
BP	GO:0071422	succinate transmembrane transport	1	0	1	1	0.33261	0.903657	gene984(YALI0_B03344g)	-
BP	GO:0071423	malate transmembrane transport	1	0	1	1	0.33261	0.903657	gene984(YALI0_B03344g)	-
BP	GO:0071453	cellular response to oxygen levels	0	1	1	1	0.33261	0.903657	-	gene3871(YALI0_D22132g)
BP	GO:0071456	cellular response to hypoxia	0	1	1	1	0.33261	0.903657	-	gene3871(YALI0_D22132g)
BP	GO:0071466	cellular response to xenobiotic stimulus	1	0	1	1	0.33261	0.903657	gene4905(YALI0_E18568g)	-
BP	GO:0071514	genetic imprinting	1	0	1	1	0.33261	0.903657	gene5946(YALI0_F06270g)	-
BP	GO:0071515	genetic imprinting at mating-type locus	1	0	1	1	0.33261	0.903657	gene5946(YALI0_F06270g)	-
BP	GO:0071516	establishment of imprinting at mating-type locus	1	0	1	1	0.33261	0.903657	gene5946(YALI0_F06270g)	-
BP	GO:0071520	actomyosin contractile ring assembly actin filament bundle convergence	0	1	1	1	0.33261	0.903657	-	gene6007(YALI0_F07601g)
BP	GO:0071528	tRNA re-export from nucleus	0	1	1	1	0.33261	0.903657	-	gene4297(YALI0_E04576g)
BP	GO:0071578	zinc II ion transmembrane import	0	1	1	1	0.33261	0.903657	-	gene6632(YALI0_F21659g)
BP	GO:0071940	fungal-type cell wall assembly	1	0	1	1	0.33261	0.903657	gene7028(YALI0_F30833g)	-
BP	GO:0071941	nitrogen cycle metabolic process	0	1	1	1	0.33261	0.903657	-	gene1996(YALI0_C03069g)
BP	GO:0071951	conversion of methionyl-tRNA to N-formyl-methionyl-tRNA	0	1	1	1	0.33261	0.903657	-	gene5973(YALI0_F06820g)
BP	GO:0072670	mitochondrial tRNA threonylcarbamoyladenosine modification	0	1	1	1	0.33261	0.903657	-	gene3261(YALI0_D07920g)
BP	GO:0072671	mitochondria-associated ubiquitin-dependent protein catabolic process	1	0	1	1	0.33261	0.903657	gene5243(YALI0_E26081g)	-
BP	GO:0072684	mitochondrial tRNA 3'-trailer cleavage, endonucleolytic	0	1	1	1	0.33261	0.903657	-	gene509(YALI0_A13057g)
BP	GO:0080009	mRNA methylation	1	0	1	1	0.33261	0.903657	gene11(YALI0_A00369g)	-
BP	GO:0080111	DNA demethylation	1	0	1	1	0.33261	0.903657	gene3243(YALI0_D07546g)	-
BP	GO:0090296	regulation of mitochondrial DNA replication	0	1	1	1	0.33261	0.903657	-	gene4852(YALI0_E17369g)
BP	GO:0090297	positive regulation of mitochondrial DNA replication	0	1	1	1	0.33261	0.903657	-	gene4852(YALI0_E17369g)
BP	GO:0090399	replicative senescence	0	1	1	1	0.33261	0.903657	-	gene3077(YALI0_D03888g)
BP	GO:0090426	actin filament bundle convergence	0	1	1	1	0.33261	0.903657	-	gene6007(YALI0_F07601g)
BP	GO:0090646	mitochondrial tRNA processing	0	1	1	1	0.33261	0.903657	-	gene6232(YALI0_F12771g)
BP	GO:0097194	execution phase of apoptosis	0	1	1	1	0.33261	0.903657	-	gene3131(YALI0_D05071g)
BP	GO:0097352	autophagosome maturation	1	0	1	1	0.33261	0.903657	gene6206(YALI0_F12155g)	-
BP	GO:0098502	DNA dephosphorylation	0	1	1	1	0.33261	0.903657	-	gene5379(YALI0_E29051g)
BP	GO:0098503	DNA 3' dephosphorylation	0	1	1	1	0.33261	0.903657	-	gene5379(YALI0_E29051g)
BP	GO:0098504	DNA 3' dephosphorylation involved in DNA repair	0	1	1	1	0.33261	0.903657	-	gene5379(YALI0_E29051g)
BP	GO:0098506	polynucleotide 3' dephosphorylation	0	1	1	1	0.33261	0.903657	-	gene5379(YALI0_E29051g)
BP	GO:0098717	pantothenate import across plasma membrane	0	1	1	1	0.33261	0.903657	-	gene5975(YALI0_F06842g)
BP	GO:0098822	peptidyl-cysteine modification to L-cysteine persulfide	0	1	1	1	0.33261	0.903657	-	gene2631(YALI0_C18095g)
BP	GO:0098927	vesicle-mediated transport between endosomal compartments	1	0	1	1	0.33261	0.903657	gene4907(YALI0_E18612g)	-
BP	GO:0106056	regulation of calcineurin-mediated signaling	1	0	1	1	0.33261	0.903657	gene4533(YALI0_E10043g)	-
BP	GO:1900037	regulation of cellular response to hypoxia	0	1	1	1	0.33261	0.903657	-	gene3871(YALI0_D22132g)
BP	GO:1900039	positive regulation of cellular response to hypoxia	0	1	1	1	0.33261	0.903657	-	gene3871(YALI0_D22132g)
BP	GO:1900076	regulation of cellular response to insulin stimulus	0	1	1	1	0.33261	0.903657	-	gene4641(YALI0_E12375g)
BP	GO:1900077	negative regulation of cellular response to insulin stimulus	0	1	1	1	0.33261	0.903657	-	gene4641(YALI0_E12375g)
BP	GO:1901337	thioester transport	1	0	1	1	0.33261	0.903657	gene5284(YALI0_E26983g)	-
BP	GO:1901569	fatty acid derivative catabolic process	1	0	1	1	0.33261	0.903657	gene6848(YALI0_F26587g)	-
BP	GO:1901652	response to peptide	0	1	1	1	0.33261	0.903657	-	gene4641(YALI0_E12375g)
BP	GO:1901653	cellular response to peptide	0	1	1	1	0.33261	0.903657	-	gene4641(YALI0_E12375g)
BP	GO:1901688	pantothenate import	0	1	1	1	0.33261	0.903657	-	gene5975(YALI0_F06842g)
BP	GO:1901858	regulation of mitochondrial DNA metabolic process	0	1	1	1	0.33261	0.903657	-	gene4852(YALI0_E17369g)
BP	GO:1901860	positive regulation of mitochondrial DNA metabolic process	0	1	1	1	0.33261	0.903657	-	gene4852(YALI0_E17369g)
BP	GO:1901962	S-adenosyl-L-methionine transmembrane transport	0	1	1	1	0.33261	0.903657	-	gene2680(YALI0_C19195g)
BP	GO:1902222	erythrose 4-phosphate/phosphoenolpyruvate family amino acid catabolic process	1	0	1	1	0.33261	0.903657	gene1793(YALI0_B21846g)	-
BP	GO:1902294	cell cycle DNA replication termination	1	0	1	1	0.33261	0.903657	gene5946(YALI0_F06270g)	-
BP	GO:1902317	nuclear DNA replication termination	1	0	1	1	0.33261	0.903657	gene5946(YALI0_F06270g)	-
BP	GO:1902356	oxaloacetate(2-) transmembrane transport	1	0	1	1	0.33261	0.903657	gene984(YALI0_B03344g)	-
BP	GO:1902369	negative regulation of RNA catabolic process	0	1	1	1	0.33261	0.903657	-	gene4167(YALI0_E01672g)
BP	GO:1902373	negative regulation of mRNA catabolic process	0	1	1	1	0.33261	0.903657	-	gene4167(YALI0_E01672g)
BP	GO:1902440	protein localization to mitotic spindle pole body	0	1	1	1	0.33261	0.903657	-	gene4034(YALI0_D26015g)
BP	GO:1902542	regulation of protein localization to mitotic spindle pole body	0	1	1	1	0.33261	0.903657	-	gene4034(YALI0_D26015g)
BP	GO:1902979	mitotic DNA replication termination	1	0	1	1	0.33261	0.903657	gene5946(YALI0_F06270g)	-
BP	GO:1903259	exon-exon junction complex disassembly	0	1	1	1	0.33261	0.903657	-	gene909(YALI0_B01562g)
BP	GO:1903457	lactate catabolic process	1	0	1	1	0.33261	0.903657	gene4236(YALI0_E03212g)	-
BP	GO:1903461	Okazaki fragment processing involved in mitotic DNA replication	1	0	1	1	0.33261	0.903657	gene5708(YALI0_F01034g)	-
BP	GO:1903478	actin filament bundle convergence involved in mitotic contractile ring assembly	0	1	1	1	0.33261	0.903657	-	gene6007(YALI0_F07601g)
BP	GO:1903479	mitotic actomyosin contractile ring assembly actin filament organization	0	1	1	1	0.33261	0.903657	-	gene6007(YALI0_F07601g)
BP	GO:1903576	response to L-arginine	1	0	1	1	0.33261	0.903657	gene1795(YALI0_B21890g)	-
BP	GO:1903577	cellular response to L-arginine	1	0	1	1	0.33261	0.903657	gene1795(YALI0_B21890g)	-
BP	GO:1903790	guanine nucleotide transmembrane transport	0	1	1	1	0.33261	0.903657	-	gene2483(YALI0_C14498g)
BP	GO:1903832	regulation of cellular response to amino acid starvation	1	0	1	1	0.33261	0.903657	gene5318(YALI0_E27742g)	-
BP	GO:1903833	positive regulation of cellular response to amino acid starvation	1	0	1	1	0.33261	0.903657	gene5318(YALI0_E27742g)	-
BP	GO:1904262	negative regulation of TORC1 signaling	0	1	1	1	0.33261	0.903657	-	gene3077(YALI0_D03888g)
BP	GO:1904812	rRNA acetylation involved in maturation of SSU-rRNA	0	1	1	1	0.33261	0.903657	-	gene1470(YALI0_B14751g)
BP	GO:1904983	transmembrane glycine transport from cytosol to mitochondrion	0	1	1	1	0.33261	0.903657	-	gene4501(YALI0_E09284g)
BP	GO:1905168	positive regulation of double-strand break repair via homologous recombination	0	1	1	1	0.33261	0.903657	-	gene3645(YALI0_D16841g)
BP	GO:1905267	endonucleolytic cleavage involved in tRNA processing	0	1	1	1	0.33261	0.903657	-	gene509(YALI0_A13057g)
BP	GO:1990126	retrograde transport, endosome to plasma membrane	1	0	1	1	0.33261	0.903657	gene4907(YALI0_E18612g)	-
BP	GO:1990519	mitochondrial pyrimidine nucleotide import	0	1	1	1	0.33261	0.903657	-	gene5908(YALI0_F05500g)
BP	GO:1990616	magnesium ion export from mitochondrion	0	1	1	1	0.33261	0.903657	-	gene6508(YALI0_F18854g)
BP	GO:1990882	rRNA acetylation	0	1	1	1	0.33261	0.903657	-	gene1470(YALI0_B14751g)
BP	GO:1990884	RNA acetylation	0	1	1	1	0.33261	0.903657	-	gene1470(YALI0_B14751g)
BP	GO:2000008	regulation of protein localization to cell surface	1	0	1	1	0.33261	0.903657	gene5765(YALI0_F02277g)	-
BP	GO:2000009	negative regulation of protein localization to cell surface	1	0	1	1	0.33261	0.903657	gene5765(YALI0_F02277g)	-
BP	GO:2000573	positive regulation of DNA biosynthetic process	0	1	1	1	0.33261	0.903657	-	gene6617(YALI0_F21329g)
BP	GO:2000638	regulation of SREBP signaling pathway	0	1	1	1	0.33261	0.903657	-	gene3871(YALI0_D22132g)
BP	GO:2000640	positive regulation of SREBP signaling pathway	0	1	1	1	0.33261	0.903657	-	gene3871(YALI0_D22132g)
BP	GO:2000689	actomyosin contractile ring assembly actin filament organization	0	1	1	1	0.33261	0.903657	-	gene6007(YALI0_F07601g)
BP	GO:2000781	positive regulation of double-strand break repair	0	1	1	1	0.33261	0.903657	-	gene3645(YALI0_D16841g)
MF	GO:0000149	SNARE binding	9	0	9	22	0.33362	0.903657	gene1243(YALI0_B09603g),gene1296(YALI0_B10780g),gene2562(YALI0_C16412g),gene2580(YALI0_C16819g),gene4030(YALI0_D25872g),gene4614(YALI0_E11825g),gene4898(YALI0_E18414g),gene4907(YALI0_E18612g),gene5465(YALI0_E30921g)	-
BP	GO:0045229	external encapsulating structure organization	19	4	23	63	0.33427	0.903657	gene1080(YALI0_B05654g),gene1163(YALI0_B07601g),gene1635(YALI0_B18348g),gene2288(YALI0_C09680g),gene2306(YALI0_C10135g),gene2501(YALI0_C14938g),gene2730(YALI0_C20273g),gene3347(YALI0_D09823g),gene4435(YALI0_E07832g),gene4540(YALI0_E10175g),gene5585(YALI0_E33363g),gene5903(YALI0_F05390g),gene6076(YALI0_F09163g),gene6136(YALI0_F10549g),gene6212(YALI0_F12331g),gene6313(YALI0_F14619g),gene7028(YALI0_…	gene1730(YALI0_B20526g),gene3382(YALI0_D10549g),gene5630(YALI0_E34331g),gene878(YALI0_B00836g)
BP	GO:0071555	cell wall organization	19	4	23	63	0.33427	0.903657	gene1080(YALI0_B05654g),gene1163(YALI0_B07601g),gene1635(YALI0_B18348g),gene2288(YALI0_C09680g),gene2306(YALI0_C10135g),gene2501(YALI0_C14938g),gene2730(YALI0_C20273g),gene3347(YALI0_D09823g),gene4435(YALI0_E07832g),gene4540(YALI0_E10175g),gene5585(YALI0_E33363g),gene5903(YALI0_F05390g),gene6076(YALI0_F09163g),gene6136(YALI0_F10549g),gene6212(YALI0_F12331g),gene6313(YALI0_F14619g),gene7028(YALI0_…	gene1730(YALI0_B20526g),gene3382(YALI0_D10549g),gene5630(YALI0_E34331g),gene878(YALI0_B00836g)
BP	GO:1903311	regulation of mRNA metabolic process	3	5	8	20	0.33567	0.903657	gene317(YALI0_A08063g),gene6066(YALI0_F08943g),gene6765(YALI0_F24717g)	gene1361(YALI0_B12276g),gene4167(YALI0_E01672g),gene4206(YALI0_E02530g),gene4496(YALI0_E09196g),gene6725(YALI0_F23815g)
MF	GO:0000907	sulfonate dioxygenase activity	3	0	3	6	0.34227	0.903657	gene3829(YALI0_D21098g),gene6684(YALI0_F22825g),gene845(YALI0_A21439g)	-
MF	GO:0000908	taurine dioxygenase activity	3	0	3	6	0.34227	0.903657	gene3829(YALI0_D21098g),gene6684(YALI0_F22825g),gene845(YALI0_A21439g)	-
MF	GO:0004784	superoxide dismutase activity	1	2	3	6	0.34227	0.903657	gene2571(YALI0_C16621g)	gene1561(YALI0_B16742g),gene1710(YALI0_B20086g)
MF	GO:0004806	triglyceride lipase activity	3	0	3	6	0.34227	0.903657	gene1175(YALI0_B08030g),gene3677(YALI0_D17534g),gene5950(YALI0_F06358g)	-
MF	GO:0015085	calcium ion transmembrane transporter activity	3	0	3	6	0.34227	0.903657	gene3121(YALI0_D04873g),gene4508(YALI0_E09471g),gene5162(YALI0_E24211g)	-
MF	GO:0015127	bilirubin transmembrane transporter activity	2	1	3	6	0.34227	0.903657	gene6203(YALI0_F12089g),gene7072(YALI0_F31845g)	gene2629(YALI0_C18051g)
MF	GO:0015174	basic amino acid transmembrane transporter activity	2	1	3	6	0.34227	0.903657	gene2390(YALI0_C12100g),gene3004(YALI0_D02046g)	gene5986(YALI0_F07106g)
MF	GO:0015216	purine nucleotide transmembrane transporter activity	1	2	3	6	0.34227	0.903657	gene6545(YALI0_F19712g)	gene2483(YALI0_C14498g),gene422(YALI0_A10659g)
MF	GO:0016721	oxidoreductase activity, acting on superoxide radicals as acceptor	1	2	3	6	0.34227	0.903657	gene2571(YALI0_C16621g)	gene1561(YALI0_B16742g),gene1710(YALI0_B20086g)
MF	GO:0016812	hydrolase activity, acting on carbon-nitrogen (but not peptide) bonds, in cyclic amides	1	2	3	6	0.34227	0.903657	gene6674(YALI0_F22605g)	gene2895(YALI0_C23969g),gene4509(YALI0_E09493g)
MF	GO:0016892	endoribonuclease activity, producing 3'-phosphomonoesters	1	2	3	6	0.34227	0.903657	gene6814(YALI0_F25839g)	gene5357(YALI0_E28600g),gene714(YALI0_A18293g)
MF	GO:0043175	RNA polymerase core enzyme binding	2	4	6	14	0.34355	0.903657	gene6135(YALI0_F10541g),gene855(YALI0_B00308g)	gene4078(YALI0_D26994g),gene6257(YALI0_F13354g),gene6642(YALI0_F21879g),gene6838(YALI0_F26367g)
MF	GO:0070063	RNA polymerase binding	2	4	6	14	0.34355	0.903657	gene6135(YALI0_F10541g),gene855(YALI0_B00308g)	gene4078(YALI0_D26994g),gene6257(YALI0_F13354g),gene6642(YALI0_F21879g),gene6838(YALI0_F26367g)
MF	GO:0000007	low-affinity zinc ion transmembrane transporter activity	0	1	1	1	0.34474	0.903657	-	gene6632(YALI0_F21659g)
MF	GO:0000095	S-adenosyl-L-methionine transmembrane transporter activity	0	1	1	1	0.34474	0.903657	-	gene2680(YALI0_C19195g)
MF	GO:0000179	rRNA (adenine-N6,N6-)-dimethyltransferase activity	0	1	1	1	0.34474	0.903657	-	gene4125(YALI0_E00770g)
MF	GO:0000225	N-acetylglucosaminylphosphatidylinositol deacetylase activity	0	1	1	1	0.34474	0.903657	-	gene5055(YALI0_E21934g)
MF	GO:0000254	C-4 methylsterol oxidase activity	0	1	1	1	0.34474	0.903657	-	gene6166(YALI0_F11297g)
MF	GO:0000319	sulfite transmembrane transporter activity	1	0	1	1	0.34474	0.903657	gene5160(YALI0_E24167g)	-
MF	GO:0000334	3-hydroxyanthranilate 3,4-dioxygenase activity	0	1	1	1	0.34474	0.903657	-	gene965(YALI0_B02852g)
MF	GO:0000980	RNA polymerase II distal enhancer sequence-specific DNA binding	1	0	1	1	0.34474	0.903657	gene2403(YALI0_C12364g)	-
MF	GO:0000994	RNA polymerase III core binding	1	0	1	1	0.34474	0.903657	gene6135(YALI0_F10541g)	-
MF	GO:0001006	RNA polymerase III type 3 promoter sequence-specific DNA binding	0	1	1	1	0.34474	0.903657	-	gene5153(YALI0_E24035g)
MF	GO:0001018	mitochondrial RNA polymerase regulatory region DNA binding	0	1	1	1	0.34474	0.903657	-	gene468(YALI0_A12001g)
MF	GO:0001025	RNA polymerase III transcription factor binding	0	1	1	1	0.34474	0.903657	-	gene4942(YALI0_E19382g)
MF	GO:0001042	RNA polymerase I core binding	0	1	1	1	0.34474	0.903657	-	gene4078(YALI0_D26994g)
MF	GO:0001156	TFIIIC-class transcription factor binding	0	1	1	1	0.34474	0.903657	-	gene4942(YALI0_E19382g)
MF	GO:0001158	enhancer sequence-specific DNA binding	1	0	1	1	0.34474	0.903657	gene2403(YALI0_C12364g)	-
MF	GO:0001409	guanine nucleotide transmembrane transporter activity	0	1	1	1	0.34474	0.903657	-	gene2483(YALI0_C14498g)
MF	GO:0001965	G-protein alpha-subunit binding	1	0	1	1	0.34474	0.903657	gene6893(YALI0_F27577g)	-
MF	GO:0002953	5'-deoxynucleotidase activity	1	0	1	1	0.34474	0.903657	gene1553(YALI0_B16566g)	-
MF	GO:0003786	actin lateral binding	0	1	1	1	0.34474	0.903657	-	gene6007(YALI0_F07601g)
MF	GO:0003842	1-pyrroline-5-carboxylate dehydrogenase activity	1	0	1	1	0.34474	0.903657	gene1245(YALI0_B09647g)	-
MF	GO:0003857	3-hydroxyacyl-CoA dehydrogenase activity	1	0	1	1	0.34474	0.903657	gene2246(YALI0_C08811g)	-
MF	GO:0003860	3-hydroxyisobutyryl-CoA hydrolase activity	0	1	1	1	0.34474	0.903657	-	gene3181(YALI0_D06215g)
MF	GO:0003861	3-isopropylmalate dehydratase activity	0	1	1	1	0.34474	0.903657	-	gene901(YALI0_B01364g)
MF	GO:0003862	3-isopropylmalate dehydrogenase activity	0	1	1	1	0.34474	0.903657	-	gene1883(YALI0_C00407g)
MF	GO:0003863	3-methyl-2-oxobutanoate dehydrogenase (2-methylpropanoyl-transferring) activity	1	0	1	1	0.34474	0.903657	gene3295(YALI0_D08690g)	-
MF	GO:0003864	3-methyl-2-oxobutanoate hydroxymethyltransferase activity	1	0	1	1	0.34474	0.903657	gene1661(YALI0_B18898g)	-
MF	GO:0003867	4-aminobutyrate transaminase activity	1	0	1	1	0.34474	0.903657	gene4891(YALI0_E18238g)	-
MF	GO:0003868	4-hydroxyphenylpyruvate dioxygenase activity	1	0	1	1	0.34474	0.903657	gene1793(YALI0_B21846g)	-
MF	GO:0003871	5-methyltetrahydropteroyltriglutamate-homocysteine S-methyltransferase activity	1	0	1	1	0.34474	0.903657	gene4656(YALI0_E12683g)	-
MF	GO:0003876	AMP deaminase activity	1	0	1	1	0.34474	0.903657	gene4599(YALI0_E11495g)	-
MF	GO:0003877	ATP adenylyltransferase activity	1	0	1	1	0.34474	0.903657	gene7005(YALI0_F30349g)	-
MF	GO:0003879	ATP phosphoribosyltransferase activity	0	1	1	1	0.34474	0.903657	-	gene2085(YALI0_C05170g)
MF	GO:0003950	NAD+ ADP-ribosyltransferase activity	1	0	1	1	0.34474	0.903657	gene2591(YALI0_C17061g)	-
MF	GO:0003962	cystathionine gamma-synthase activity	1	0	1	1	0.34474	0.903657	gene3671(YALI0_D17402g)	-
MF	GO:0003979	UDP-glucose 6-dehydrogenase activity	1	0	1	1	0.34474	0.903657	gene3016(YALI0_D02321g)	-
MF	GO:0003987	acetate-CoA ligase activity	0	1	1	1	0.34474	0.903657	-	gene5930(YALI0_F05962g)
MF	GO:0003989	acetyl-CoA carboxylase activity	0	1	1	1	0.34474	0.903657	-	gene2360(YALI0_C11407g)
MF	GO:0004012	phospholipid-translocating ATPase activity	1	0	1	1	0.34474	0.903657	gene4278(YALI0_E04158g)	-
MF	GO:0004021	L-alanine:2-oxoglutarate aminotransferase activity	1	0	1	1	0.34474	0.903657	gene3186(YALI0_D06325g)	-
MF	GO:0004034	aldose 1-epimerase activity	0	1	1	1	0.34474	0.903657	-	gene2283(YALI0_C09570g)
MF	GO:0004037	allantoicase activity	1	0	1	1	0.34474	0.903657	gene3712(YALI0_D18337g)	-
MF	GO:0004045	aminoacyl-tRNA hydrolase activity	0	1	1	1	0.34474	0.903657	-	gene5305(YALI0_E27412g)
MF	GO:0004047	aminomethyltransferase activity	1	0	1	1	0.34474	0.903657	gene5789(YALI0_F02849g)	-
MF	GO:0004053	arginase activity	1	0	1	1	0.34474	0.903657	gene4425(YALI0_E07535g)	-
MF	GO:0004057	arginyltransferase activity	0	1	1	1	0.34474	0.903657	-	gene4266(YALI0_E03894g)
MF	GO:0004076	biotin synthase activity	1	0	1	1	0.34474	0.903657	gene3589(YALI0_D15400g)	-
MF	GO:0004089	carbonate dehydratase activity	0	1	1	1	0.34474	0.903657	-	gene6621(YALI0_F21406g)
MF	GO:0004099	chitin deacetylase activity	1	0	1	1	0.34474	0.903657	gene7028(YALI0_F30833g)	-
MF	GO:0004109	coproporphyrinogen oxidase activity	0	1	1	1	0.34474	0.903657	-	gene5421(YALI0_E29975g)
MF	GO:0004121	cystathionine beta-lyase activity	1	0	1	1	0.34474	0.903657	gene2942(YALI0_D00605g)	-
MF	GO:0004132	dCMP deaminase activity	0	1	1	1	0.34474	0.903657	-	gene2860(YALI0_C23210g)
MF	GO:0004144	diacylglycerol O-acyltransferase activity	1	0	1	1	0.34474	0.903657	gene3264(YALI0_D07986g)	-
MF	GO:0004160	dihydroxy-acid dehydratase activity	0	1	1	1	0.34474	0.903657	-	gene2871(YALI0_C23408g)
MF	GO:0004168	dolichol kinase activity	1	0	1	1	0.34474	0.903657	gene4922(YALI0_E18942g)	-
MF	GO:0004174	electron-transferring-flavoprotein dehydrogenase activity	1	0	1	1	0.34474	0.903657	gene2497(YALI0_C14806g)	-
MF	GO:0004198	calcium-dependent cysteine-type endopeptidase activity	0	1	1	1	0.34474	0.903657	-	gene3562(YALI0_D14740g)
MF	GO:0004309	exopolyphosphatase activity	0	1	1	1	0.34474	0.903657	-	gene1538(YALI0_B16236g)
MF	GO:0004313	[acyl-carrier-protein] S-acetyltransferase activity	0	1	1	1	0.34474	0.903657	-	gene1485(YALI0_B15059g)
MF	GO:0004316	3-oxoacyl-[acyl-carrier-protein] reductase (NADPH) activity	0	1	1	1	0.34474	0.903657	-	gene1682(YALI0_B19382g)
MF	GO:0004318	enoyl-[acyl-carrier-protein] reductase (NADH) activity	0	1	1	1	0.34474	0.903657	-	gene1485(YALI0_B15059g)
MF	GO:0004320	oleoyl-[acyl-carrier-protein] hydrolase activity	0	1	1	1	0.34474	0.903657	-	gene1485(YALI0_B15059g)
MF	GO:0004333	fumarate hydratase activity	0	1	1	1	0.34474	0.903657	-	gene2158(YALI0_C06776g)
MF	GO:0004335	galactokinase activity	0	1	1	1	0.34474	0.903657	-	gene2430(YALI0_C13090g)
MF	GO:0004338	glucan exo-1,3-beta-glucosidase activity	1	0	1	1	0.34474	0.903657	gene5903(YALI0_F05390g)	-
MF	GO:0004339	glucan 1,4-alpha-glucosidase activity	1	0	1	1	0.34474	0.903657	gene4325(YALI0_E05203g)	-
MF	GO:0004342	glucosamine-6-phosphate deaminase activity	1	0	1	1	0.34474	0.903657	gene1927(YALI0_C01419g)	-
MF	GO:0004343	glucosamine 6-phosphate N-acetyltransferase activity	1	0	1	1	0.34474	0.903657	gene3790(YALI0_D20152g)	-
MF	GO:0004349	glutamate 5-kinase activity	1	0	1	1	0.34474	0.903657	gene753(YALI0_A19206g)	-
MF	GO:0004351	glutamate decarboxylase activity	0	1	1	1	0.34474	0.903657	-	gene6044(YALI0_F08415g)
MF	GO:0004352	glutamate dehydrogenase (NAD+) activity	1	0	1	1	0.34474	0.903657	gene4513(YALI0_E09603g)	-
MF	GO:0004354	glutamate dehydrogenase (NADP+) activity	1	0	1	1	0.34474	0.903657	gene6458(YALI0_F17820g)	-
MF	GO:0004357	glutamate-cysteine ligase activity	1	0	1	1	0.34474	0.903657	gene5427(YALI0_E30129g)	-
MF	GO:0004360	glutamine-fructose-6-phosphate transaminase (isomerizing) activity	1	0	1	1	0.34474	0.903657	gene1772(YALI0_B21428g)	-
MF	GO:0004375	glycine dehydrogenase (decarboxylating) activity	1	0	1	1	0.34474	0.903657	gene389(YALI0_A09856g)	-
MF	GO:0004377	GDP-Man:Man3GlcNAc2-PP-Dol alpha-1,2-mannosyltransferase activity	1	0	1	1	0.34474	0.903657	gene3288(YALI0_D08558g)	-
MF	GO:0004395	hexaprenyldihydroxybenzoate methyltransferase activity	0	1	1	1	0.34474	0.903657	-	gene1522(YALI0_B15884g)
MF	GO:0004409	homoaconitate hydratase activity	0	1	1	1	0.34474	0.903657	-	gene4215(YALI0_E02728g)
MF	GO:0004417	hydroxyethylthiazole kinase activity	0	1	1	1	0.34474	0.903657	-	gene2532(YALI0_C15554g)
MF	GO:0004418	hydroxymethylbilane synthase activity	0	1	1	1	0.34474	0.903657	-	gene6849(YALI0_F26609g)
MF	GO:0004419	hydroxymethylglutaryl-CoA lyase activity	1	0	1	1	0.34474	0.903657	gene1824(YALI0_B22550g)	-
MF	GO:0004435	phosphatidylinositol phospholipase C activity	1	0	1	1	0.34474	0.903657	gene2046(YALI0_C04180g)	-
MF	GO:0004455	ketol-acid reductoisomerase activity	0	1	1	1	0.34474	0.903657	-	gene3050(YALI0_D03135g)
MF	GO:0004458	D-lactate dehydrogenase (cytochrome) activity	1	0	1	1	0.34474	0.903657	gene4236(YALI0_E03212g)	-
MF	GO:0004467	long-chain fatty acid-CoA ligase activity	1	0	1	1	0.34474	0.903657	gene4795(YALI0_E16016g)	-
MF	GO:0004468	lysine N-acetyltransferase activity, acting on acetyl phosphate as donor	1	0	1	1	0.34474	0.903657	gene4340(YALI0_E05533g)	-
MF	GO:0004470	malic enzyme activity	0	1	1	1	0.34474	0.903657	-	gene4908(YALI0_E18634g)
MF	GO:0004471	malate dehydrogenase (decarboxylating) (NAD+) activity	0	1	1	1	0.34474	0.903657	-	gene4908(YALI0_E18634g)
MF	GO:0004476	mannose-6-phosphate isomerase activity	1	0	1	1	0.34474	0.903657	gene1635(YALI0_B18348g)	-
MF	GO:0004479	methionyl-tRNA formyltransferase activity	0	1	1	1	0.34474	0.903657	-	gene5973(YALI0_F06820g)
MF	GO:0004485	methylcrotonoyl-CoA carboxylase activity	1	0	1	1	0.34474	0.903657	gene4651(YALI0_E12595g)	-
MF	GO:0004487	methylenetetrahydrofolate dehydrogenase (NAD+) activity	1	0	1	1	0.34474	0.903657	gene1353(YALI0_B12078g)	-
MF	GO:0004491	methylmalonate-semialdehyde dehydrogenase (acylating) activity	1	0	1	1	0.34474	0.903657	gene1945(YALI0_C01859g)	-
MF	GO:0004516	nicotinate phosphoribosyltransferase activity	1	0	1	1	0.34474	0.903657	gene852(YALI0_B00220g)	-
MF	GO:0004564	beta-fructofuranosidase activity	1	0	1	1	0.34474	0.903657	gene5273(YALI0_E26719g)	-
MF	GO:0004568	chitinase activity	1	0	1	1	0.34474	0.903657	gene5865(YALI0_F04532g)	-
MF	GO:0004575	sucrose alpha-glucosidase activity	1	0	1	1	0.34474	0.903657	gene5273(YALI0_E26719g)	-
MF	GO:0004578	chitobiosyldiphosphodolichol beta-mannosyltransferase activity	0	1	1	1	0.34474	0.903657	-	gene5621(YALI0_E34133g)
MF	GO:0004584	dolichyl-phosphate-mannose-glycolipid alpha-mannosyltransferase activity	1	0	1	1	0.34474	0.903657	gene6183(YALI0_F11649g)	-
MF	GO:0004585	ornithine carbamoyltransferase activity	0	1	1	1	0.34474	0.903657	-	gene3568(YALI0_D14894g)
MF	GO:0004587	ornithine-oxo-acid transaminase activity	1	0	1	1	0.34474	0.903657	gene2057(YALI0_C04433g)	-
MF	GO:0004592	pantoate-beta-alanine ligase activity	0	1	1	1	0.34474	0.903657	-	gene1096(YALI0_B06006g)
MF	GO:0004604	phosphoadenylyl-sulfate reductase (thioredoxin) activity	1	0	1	1	0.34474	0.903657	gene1180(YALI0_B08140g)	-
MF	GO:0004608	phosphatidylethanolamine N-methyltransferase activity	0	1	1	1	0.34474	0.903657	-	gene4364(YALI0_E06061g)
MF	GO:0004611	phosphoenolpyruvate carboxykinase activity	1	0	1	1	0.34474	0.903657	gene2588(YALI0_C16995g)	-
MF	GO:0004612	phosphoenolpyruvate carboxykinase (ATP) activity	1	0	1	1	0.34474	0.903657	gene2588(YALI0_C16995g)	-
MF	GO:0004621	glycosylphosphatidylinositol phospholipase D activity	0	1	1	1	0.34474	0.903657	-	gene1526(YALI0_B15972g)
MF	GO:0004637	phosphoribosylamine-glycine ligase activity	1	0	1	1	0.34474	0.903657	gene6604(YALI0_F21010g)	-
MF	GO:0004641	phosphoribosylformylglycinamidine cyclo-ligase activity	1	0	1	1	0.34474	0.903657	gene6604(YALI0_F21010g)	-
MF	GO:0004655	porphobilinogen synthase activity	0	1	1	1	0.34474	0.903657	-	gene6594(YALI0_F20790g)
MF	GO:0004657	proline dehydrogenase activity	1	0	1	1	0.34474	0.903657	gene1244(YALI0_B09625g)	-
MF	GO:0004697	protein kinase C activity	1	0	1	1	0.34474	0.903657	gene6100(YALI0_F09746g)	-
MF	GO:0004726	non-membrane spanning protein tyrosine phosphatase activity	1	0	1	1	0.34474	0.903657	gene5554(YALI0_E32681g)	-
MF	GO:0004733	pyridoxamine-phosphate oxidase activity	0	1	1	1	0.34474	0.903657	-	gene3544(YALI0_D14322g)
MF	GO:0004767	sphingomyelin phosphodiesterase activity	1	0	1	1	0.34474	0.903657	gene643(YALI0_A16610g)	-
MF	GO:0004772	sterol O-acyltransferase activity	1	0	1	1	0.34474	0.903657	gene5962(YALI0_F06578g)	-
MF	GO:0004777	succinate-semialdehyde dehydrogenase (NAD+) activity	1	0	1	1	0.34474	0.903657	gene6831(YALI0_F26191g)	-
MF	GO:0004780	sulfate adenylyltransferase (ADP) activity	1	0	1	1	0.34474	0.903657	gene7005(YALI0_F30349g)	-
MF	GO:0004788	thiamine diphosphokinase activity	1	0	1	1	0.34474	0.903657	gene5029(YALI0_E21351g)	-
MF	GO:0004789	thiamine-phosphate diphosphorylase activity	0	1	1	1	0.34474	0.903657	-	gene2532(YALI0_C15554g)
MF	GO:0004793	threonine aldolase activity	1	0	1	1	0.34474	0.903657	gene844(YALI0_A21417g)	-
MF	GO:0004799	thymidylate synthase activity	1	0	1	1	0.34474	0.903657	gene2339(YALI0_C10901g)	-
MF	GO:0004814	arginine-tRNA ligase activity	0	1	1	1	0.34474	0.903657	-	gene4880(YALI0_E17985g)
MF	GO:0004821	histidine-tRNA ligase activity	0	1	1	1	0.34474	0.903657	-	gene4673(YALI0_E13123g)
MF	GO:0004846	urate oxidase activity	1	0	1	1	0.34474	0.903657	gene6079(YALI0_F09251g)	-
MF	GO:0004848	ureidoglycolate hydrolase activity	1	0	1	1	0.34474	0.903657	gene5968(YALI0_F06710g)	-
MF	GO:0004856	xylulokinase activity	1	0	1	1	0.34474	0.903657	gene6150(YALI0_F10923g)	-
MF	GO:0005044	scavenger receptor activity	1	0	1	1	0.34474	0.903657	gene4458(YALI0_E08360g)	-
MF	GO:0005324	long-chain fatty acid transporter activity	1	0	1	1	0.34474	0.903657	gene4795(YALI0_E16016g)	-
MF	GO:0005436	sodium:phosphate symporter activity	1	0	1	1	0.34474	0.903657	gene5146(YALI0_E23859g)	-
MF	GO:0005544	calcium-dependent phospholipid binding	1	0	1	1	0.34474	0.903657	gene3278(YALI0_D08338g)	-
MF	GO:0005545	1-phosphatidylinositol binding	1	0	1	1	0.34474	0.903657	gene1243(YALI0_B09603g)	-
MF	GO:0008061	chitin binding	1	0	1	1	0.34474	0.903657	gene5865(YALI0_F04532g)	-
MF	GO:0008119	thiopurine S-methyltransferase activity	1	0	1	1	0.34474	0.903657	gene4337(YALI0_E05467g)	-
MF	GO:0008239	dipeptidyl-peptidase activity	1	0	1	1	0.34474	0.903657	gene1689(YALI0_B19580g)	-
MF	GO:0008260	3-oxoacid CoA-transferase activity	1	0	1	1	0.34474	0.903657	gene6848(YALI0_F26587g)	-
MF	GO:0008398	sterol 14-demethylase activity	0	1	1	1	0.34474	0.903657	-	gene1059(YALI0_B05126g)
MF	GO:0008429	phosphatidylethanolamine binding	1	0	1	1	0.34474	0.903657	gene4212(YALI0_E02662g)	-
MF	GO:0008442	3-hydroxyisobutyrate dehydrogenase activity	1	0	1	1	0.34474	0.903657	gene5778(YALI0_F02607g)	-
MF	GO:0008444	CDP-diacylglycerol-glycerol-3-phosphate 3-phosphatidyltransferase activity	0	1	1	1	0.34474	0.903657	-	gene4714(YALI0_E14102g)
MF	GO:0008448	N-acetylglucosamine-6-phosphate deacetylase activity	1	0	1	1	0.34474	0.903657	gene4977(YALI0_E20163g)	-
MF	GO:0008470	isovaleryl-CoA dehydrogenase activity	1	0	1	1	0.34474	0.903657	gene4650(YALI0_E12573g)	-
MF	GO:0008494	translation activator activity	0	1	1	1	0.34474	0.903657	-	gene265(YALI0_A06765g)
MF	GO:0008495	protoheme IX farnesyltransferase activity	0	1	1	1	0.34474	0.903657	-	gene6721(YALI0_F23727g)
MF	GO:0008517	folic acid transporter activity	0	1	1	1	0.34474	0.903657	-	gene652(YALI0_A16863g)
MF	GO:0008521	acetyl-CoA transporter activity	1	0	1	1	0.34474	0.903657	gene5284(YALI0_E26983g)	-
MF	GO:0008568	microtubule-severing ATPase activity	1	0	1	1	0.34474	0.903657	gene1743(YALI0_B20834g)	-
MF	GO:0008597	calcium-dependent protein serine/threonine phosphatase regulator activity	1	0	1	1	0.34474	0.903657	gene4533(YALI0_E10043g)	-
MF	GO:0008659	(3R)-hydroxymyristoyl-[acyl-carrier-protein] dehydratase activity	0	1	1	1	0.34474	0.903657	-	gene1485(YALI0_B15059g)
MF	GO:0008682	2-octoprenyl-3-methyl-6-methoxy-1,4-benzoquinone hydroxylase activity	0	1	1	1	0.34474	0.903657	-	gene4763(YALI0_E15224g)
MF	GO:0008686	3,4-dihydroxy-2-butanone-4-phosphate synthase activity	1	0	1	1	0.34474	0.903657	gene1215(YALI0_B08965g)	-
MF	GO:0008689	3-demethylubiquinone-9 3-O-methyltransferase activity	0	1	1	1	0.34474	0.903657	-	gene1522(YALI0_B15884g)
MF	GO:0008703	5-amino-6-(5-phosphoribosylamino)uracil reductase activity	1	0	1	1	0.34474	0.903657	gene3195(YALI0_D06501g)	-
MF	GO:0008720	D-lactate dehydrogenase activity	1	0	1	1	0.34474	0.903657	gene4236(YALI0_E03212g)	-
MF	GO:0008732	L-allo-threonine aldolase activity	1	0	1	1	0.34474	0.903657	gene844(YALI0_A21417g)	-
MF	GO:0008775	acetate CoA-transferase activity	0	1	1	1	0.34474	0.903657	-	gene5467(YALI0_E30965g)
MF	GO:0008794	arsenate reductase (glutaredoxin) activity	1	0	1	1	0.34474	0.903657	gene3670(YALI0_D17380g)	-
MF	GO:0008796	bis(5'-nucleosyl)-tetraphosphatase activity	1	0	1	1	0.34474	0.903657	gene7005(YALI0_F30349g)	-
MF	GO:0008808	cardiolipin synthase activity	0	1	1	1	0.34474	0.903657	-	gene6726(YALI0_F23837g)
MF	GO:0008841	dihydrofolate synthase activity	0	1	1	1	0.34474	0.903657	-	gene396(YALI0_A10032g)
MF	GO:0008892	guanine deaminase activity	1	0	1	1	0.34474	0.903657	gene5227(YALI0_E25740g)	-
MF	GO:0008898	S-adenosylmethionine-homocysteine S-methyltransferase activity	0	1	1	1	0.34474	0.903657	-	gene6805(YALI0_F25641g)
MF	GO:0008902	hydroxymethylpyrimidine kinase activity	0	1	1	1	0.34474	0.903657	-	gene4281(YALI0_E04224g)
MF	GO:0008972	phosphomethylpyrimidine kinase activity	0	1	1	1	0.34474	0.903657	-	gene4281(YALI0_E04224g)
MF	GO:0008999	ribosomal-protein-alanine N-acetyltransferase activity	1	0	1	1	0.34474	0.903657	gene916(YALI0_B01716g)	-
MF	GO:0009013	succinate-semialdehyde dehydrogenase [NAD(P)+] activity	1	0	1	1	0.34474	0.903657	gene6831(YALI0_F26191g)	-
MF	GO:0010309	acireductone dioxygenase [iron(II)-requiring] activity	1	0	1	1	0.34474	0.903657	gene559(YALI0_A14498g)	-
MF	GO:0010420	polyprenyldihydroxybenzoate methyltransferase activity	0	1	1	1	0.34474	0.903657	-	gene1522(YALI0_B15884g)
MF	GO:0015104	antimonite transmembrane transporter activity	1	0	1	1	0.34474	0.903657	gene2195(YALI0_C07590g)	-
MF	GO:0015105	arsenite transmembrane transporter activity	1	0	1	1	0.34474	0.903657	gene2195(YALI0_C07590g)	-
MF	GO:0015117	thiosulfate transmembrane transporter activity	1	0	1	1	0.34474	0.903657	gene984(YALI0_B03344g)	-
MF	GO:0015131	oxaloacetate transmembrane transporter activity	1	0	1	1	0.34474	0.903657	gene984(YALI0_B03344g)	-
MF	GO:0015140	malate transmembrane transporter activity	1	0	1	1	0.34474	0.903657	gene984(YALI0_B03344g)	-
MF	GO:0015141	succinate transmembrane transporter activity	1	0	1	1	0.34474	0.903657	gene984(YALI0_B03344g)	-
MF	GO:0015187	glycine transmembrane transporter activity	0	1	1	1	0.34474	0.903657	-	gene4501(YALI0_E09284g)
MF	GO:0015218	pyrimidine nucleotide transmembrane transporter activity	0	1	1	1	0.34474	0.903657	-	gene5908(YALI0_F05500g)
MF	GO:0015225	biotin transporter activity	0	1	1	1	0.34474	0.903657	-	gene2293(YALI0_C09823g)
MF	GO:0015233	pantothenate transmembrane transporter activity	0	1	1	1	0.34474	0.903657	-	gene5975(YALI0_F06842g)
MF	GO:0015245	fatty acid transporter activity	1	0	1	1	0.34474	0.903657	gene4795(YALI0_E16016g)	-
MF	GO:0015319	sodium:inorganic phosphate symporter activity	1	0	1	1	0.34474	0.903657	gene5146(YALI0_E23859g)	-
MF	GO:0015410	manganese-transporting ATPase activity	1	0	1	1	0.34474	0.903657	gene4508(YALI0_E09471g)	-
MF	GO:0015645	fatty acid ligase activity	1	0	1	1	0.34474	0.903657	gene4795(YALI0_E16016g)	-
MF	GO:0015930	glutamate synthase activity	1	0	1	1	0.34474	0.903657	gene1706(YALI0_B19998g)	-
MF	GO:0016040	glutamate synthase (NADH) activity	1	0	1	1	0.34474	0.903657	gene1706(YALI0_B19998g)	-
MF	GO:0016263	glycoprotein-N-acetylgalactosamine 3-beta-galactosyltransferase activity	1	0	1	1	0.34474	0.903657	gene6710(YALI0_F23485g)	-
MF	GO:0016295	myristoyl-[acyl-carrier-protein] hydrolase activity	0	1	1	1	0.34474	0.903657	-	gene1485(YALI0_B15059g)
MF	GO:0016296	palmitoyl-[acyl-carrier-protein] hydrolase activity	0	1	1	1	0.34474	0.903657	-	gene1485(YALI0_B15059g)
MF	GO:0016297	acyl-[acyl-carrier-protein] hydrolase activity	0	1	1	1	0.34474	0.903657	-	gene1485(YALI0_B15059g)
MF	GO:0016415	octanoyltransferase activity	0	1	1	1	0.34474	0.903657	-	gene6883(YALI0_F27357g)
MF	GO:0016428	tRNA (cytosine-5-)-methyltransferase activity	0	1	1	1	0.34474	0.903657	-	gene4394(YALI0_E06765g)
MF	GO:0016594	glycine binding	1	0	1	1	0.34474	0.903657	gene389(YALI0_A09856g)	-
MF	GO:0016631	enoyl-[acyl-carrier-protein] reductase activity	0	1	1	1	0.34474	0.903657	-	gene1485(YALI0_B15059g)
MF	GO:0016642	oxidoreductase activity, acting on the CH-NH2 group of donors, disulfide as acceptor	1	0	1	1	0.34474	0.903657	gene389(YALI0_A09856g)	-
MF	GO:0016649	oxidoreductase activity, acting on the CH-NH group of donors, quinone or similar compound as acceptor	1	0	1	1	0.34474	0.903657	gene2497(YALI0_C14806g)	-
MF	GO:0016661	oxidoreductase activity, acting on other nitrogenous compounds as donors	1	0	1	1	0.34474	0.903657	gene6079(YALI0_F09251g)	-
MF	GO:0016663	oxidoreductase activity, acting on other nitrogenous compounds as donors, oxygen as acceptor	1	0	1	1	0.34474	0.903657	gene6079(YALI0_F09251g)	-
MF	GO:0016807	cysteine-type carboxypeptidase activity	1	0	1	1	0.34474	0.903657	gene4708(YALI0_E13970g)	-
MF	GO:0016855	racemase and epimerase activity, acting on amino acids and derivatives	1	0	1	1	0.34474	0.903657	gene1681(YALI0_B19360g)	-
MF	GO:0016906	sterol 3-beta-glucosyltransferase activity	1	0	1	1	0.34474	0.903657	gene3715(YALI0_D18403g)	-
MF	GO:0016920	pyroglutamyl-peptidase activity	1	0	1	1	0.34474	0.903657	gene6911(YALI0_F27973g)	-
MF	GO:0017017	MAP kinase tyrosine/serine/threonine phosphatase activity	1	0	1	1	0.34474	0.903657	gene5700(YALI0_F00858g)	-
MF	GO:0017178	diphthine-ammonia ligase activity	0	1	1	1	0.34474	0.903657	-	gene6310(YALI0_F14553g)
MF	GO:0018114	threonine racemase activity	1	0	1	1	0.34474	0.903657	gene1681(YALI0_B19360g)	-
MF	GO:0018478	malonate-semialdehyde dehydrogenase (acetylating) activity	1	0	1	1	0.34474	0.903657	gene1945(YALI0_C01859g)	-
MF	GO:0019187	beta-1,4-mannosyltransferase activity	0	1	1	1	0.34474	0.903657	-	gene5621(YALI0_E34133g)
MF	GO:0019777	Atg12 transferase activity	0	1	1	1	0.34474	0.903657	-	gene3925(YALI0_D23386g)
MF	GO:0019778	Atg12 activating enzyme activity	1	0	1	1	0.34474	0.903657	gene2723(YALI0_C20119g)	-
MF	GO:0019779	Atg8 activating enzyme activity	1	0	1	1	0.34474	0.903657	gene2723(YALI0_C20119g)	-
MF	GO:0030371	translation repressor activity	1	0	1	1	0.34474	0.903657	gene317(YALI0_A08063g)	-
MF	GO:0030378	serine racemase activity	1	0	1	1	0.34474	0.903657	gene1681(YALI0_B19360g)	-
MF	GO:0030507	spectrin binding	1	0	1	1	0.34474	0.903657	gene7018(YALI0_F30613g)	-
MF	GO:0030572	phosphatidyltransferase activity	0	1	1	1	0.34474	0.903657	-	gene6726(YALI0_F23837g)
MF	GO:0030611	arsenate reductase activity	1	0	1	1	0.34474	0.903657	gene3670(YALI0_D17380g)	-
MF	GO:0030613	oxidoreductase activity, acting on phosphorus or arsenic in donors	1	0	1	1	0.34474	0.903657	gene3670(YALI0_D17380g)	-
MF	GO:0030614	oxidoreductase activity, acting on phosphorus or arsenic in donors, disulfide as acceptor	1	0	1	1	0.34474	0.903657	gene3670(YALI0_D17380g)	-
MF	GO:0030621	U4 snRNA binding	0	1	1	1	0.34474	0.903657	-	gene5337(YALI0_E28226g)
MF	GO:0030696	tRNA (m5U54) methyltransferase activity	0	1	1	1	0.34474	0.903657	-	gene6567(YALI0_F20196g)
MF	GO:0030697	S-adenosylmethionine-dependent tRNA (m5U54) methyltransferase activity	0	1	1	1	0.34474	0.903657	-	gene6567(YALI0_F20196g)
MF	GO:0030943	mitochondrion targeting sequence binding	0	1	1	1	0.34474	0.903657	-	gene278(YALI0_A07084g)
MF	GO:0030975	thiamine binding	1	0	1	1	0.34474	0.903657	gene5029(YALI0_E21351g)	-
MF	GO:0031405	lipoic acid binding	1	0	1	1	0.34474	0.903657	gene3945(YALI0_D23815g)	-
MF	GO:0031492	nucleosomal DNA binding	1	0	1	1	0.34474	0.903657	gene1540(YALI0_B16280g)	-
MF	GO:0031681	G-protein beta-subunit binding	1	0	1	1	0.34474	0.903657	gene261(YALI0_A06699g)	-
MF	GO:0031924	vitamin B6 transporter activity	0	1	1	1	0.34474	0.903657	-	gene3235(YALI0_D07392g)
MF	GO:0031957	very long-chain fatty acid-CoA ligase activity	1	0	1	1	0.34474	0.903657	gene4795(YALI0_E16016g)	-
MF	GO:0033204	ribonuclease P RNA binding	0	1	1	1	0.34474	0.903657	-	gene2029(YALI0_C03784g)
MF	GO:0033819	lipoyl(octanoyl) transferase activity	0	1	1	1	0.34474	0.903657	-	gene6883(YALI0_F27357g)
MF	GO:0033971	hydroxyisourate hydrolase activity	1	0	1	1	0.34474	0.903657	gene6674(YALI0_F22605g)	-
MF	GO:0034479	phosphatidylglycerol phospholipase C activity	1	0	1	1	0.34474	0.903657	gene6036(YALI0_F08217g)	-
MF	GO:0034737	ergosterol O-acyltransferase activity	1	0	1	1	0.34474	0.903657	gene5962(YALI0_F06578g)	-
MF	GO:0035326	enhancer binding	1	0	1	1	0.34474	0.903657	gene2403(YALI0_C12364g)	-
MF	GO:0036054	protein-malonyllysine demalonylase activity	0	1	1	1	0.34474	0.903657	-	gene3815(YALI0_D20724g)
MF	GO:0036055	protein-succinyllysine desuccinylase activity	0	1	1	1	0.34474	0.903657	-	gene3815(YALI0_D20724g)
MF	GO:0036361	racemase activity, acting on amino acids and derivatives	1	0	1	1	0.34474	0.903657	gene1681(YALI0_B19360g)	-
MF	GO:0038024	cargo receptor activity	1	0	1	1	0.34474	0.903657	gene4458(YALI0_E08360g)	-
MF	GO:0042083	5,10-methylenetetrahydrofolate-dependent methyltransferase activity	1	0	1	1	0.34474	0.903657	gene2339(YALI0_C10901g)	-
MF	GO:0042085	5-methyltetrahydropteroyltri-L-glutamate-dependent methyltransferase activity	1	0	1	1	0.34474	0.903657	gene4656(YALI0_E12683g)	-
MF	GO:0042134	rRNA primary transcript binding	0	1	1	1	0.34474	0.903657	-	gene4305(YALI0_E04741g)
MF	GO:0042292	URM1 activating enzyme activity	0	1	1	1	0.34474	0.903657	-	gene2631(YALI0_C18095g)
MF	GO:0042602	riboflavin reductase (NADPH) activity	0	1	1	1	0.34474	0.903657	-	gene2230(YALI0_C08459g)
MF	GO:0043333	2-octaprenyl-6-methoxy-1,4-benzoquinone methyltransferase activity	0	1	1	1	0.34474	0.903657	-	gene2636(YALI0_C18205g)
MF	GO:0043334	2-hexaprenyl-6-methoxy-1,4-benzoquinone methyltransferase activity	0	1	1	1	0.34474	0.903657	-	gene2636(YALI0_C18205g)
MF	GO:0043399	tRNA A64-2'-O-ribosylphosphate transferase activity	0	1	1	1	0.34474	0.903657	-	gene5058(YALI0_E22000g)
MF	GO:0043821	propionyl-CoA:succinate CoA-transferase activity	0	1	1	1	0.34474	0.903657	-	gene5467(YALI0_E30965g)
MF	GO:0043829	tRNA-specific adenosine-37 deaminase activity	0	1	1	1	0.34474	0.903657	-	gene1639(YALI0_B18436g)
MF	GO:0043998	H2A histone acetyltransferase activity	1	0	1	1	0.34474	0.903657	gene869(YALI0_B00638g)	-
MF	GO:0045140	inositol phosphoceramide synthase activity	1	0	1	1	0.34474	0.903657	gene4812(YALI0_E16434g)	-
MF	GO:0045181	glutamate synthase activity, NAD(P)H as acceptor	1	0	1	1	0.34474	0.903657	gene1706(YALI0_B19998g)	-
MF	GO:0046403	polynucleotide 3'-phosphatase activity	0	1	1	1	0.34474	0.903657	-	gene5379(YALI0_E29051g)
MF	GO:0046404	ATP-dependent polydeoxyribonucleotide 5'-hydroxyl-kinase activity	0	1	1	1	0.34474	0.903657	-	gene5379(YALI0_E29051g)
MF	GO:0046557	glucan endo-1,6-beta-glucosidase activity	1	0	1	1	0.34474	0.903657	gene5622(YALI0_E34155g)	-
MF	GO:0047419	N-acetylgalactosamine-6-phosphate deacetylase activity	1	0	1	1	0.34474	0.903657	gene4977(YALI0_E20163g)	-
MF	GO:0047451	3-hydroxyoctanoyl-[acyl-carrier-protein] dehydratase activity	0	1	1	1	0.34474	0.903657	-	gene1485(YALI0_B15059g)
MF	GO:0047623	adenosine-phosphate deaminase activity	1	0	1	1	0.34474	0.903657	gene4599(YALI0_E11495g)	-
MF	GO:0047635	alanine-oxo-acid transaminase activity	1	0	1	1	0.34474	0.903657	gene3186(YALI0_D06325g)	-
MF	GO:0047661	amino-acid racemase activity	1	0	1	1	0.34474	0.903657	gene1681(YALI0_B19360g)	-
MF	GO:0047874	dolichyldiphosphatase activity	0	1	1	1	0.34474	0.903657	-	gene3827(YALI0_D21032g)
MF	GO:0048040	UDP-glucuronate decarboxylase activity	0	1	1	1	0.34474	0.903657	-	gene3143(YALI0_D05335g)
MF	GO:0048531	beta-1,3-galactosyltransferase activity	1	0	1	1	0.34474	0.903657	gene6710(YALI0_F23485g)	-
MF	GO:0050085	mannitol 2-dehydrogenase (NADP+) activity	0	1	1	1	0.34474	0.903657	-	gene1536(YALI0_B16192g)
MF	GO:0050145	nucleoside phosphate kinase activity	0	1	1	1	0.34474	0.903657	-	gene5379(YALI0_E29051g)
MF	GO:0050152	omega-amidase activity	1	0	1	1	0.34474	0.903657	gene1153(YALI0_B07359g)	-
MF	GO:0050353	trimethyllysine dioxygenase activity	1	0	1	1	0.34474	0.903657	gene2324(YALI0_C10604g)	-
MF	GO:0050385	ureidoglycolate lyase activity	1	0	1	1	0.34474	0.903657	gene5968(YALI0_F06710g)	-
MF	GO:0050613	delta14-sterol reductase activity	0	1	1	1	0.34474	0.903657	-	gene1859(YALI0_B23298g)
MF	GO:0051267	CP2 mannose-ethanolamine phosphotransferase activity	0	1	1	1	0.34474	0.903657	-	gene4044(YALI0_D26235g)
MF	GO:0051730	GTP-dependent polyribonucleotide 5'-hydroxyl-kinase activity	1	0	1	1	0.34474	0.903657	gene3569(YALI0_D14916g)	-
MF	GO:0051732	polyribonucleotide kinase activity	1	0	1	1	0.34474	0.903657	gene3569(YALI0_D14916g)	-
MF	GO:0051733	polydeoxyribonucleotide kinase activity	0	1	1	1	0.34474	0.903657	-	gene5379(YALI0_E29051g)
MF	GO:0051734	ATP-dependent polynucleotide kinase activity	0	1	1	1	0.34474	0.903657	-	gene5379(YALI0_E29051g)
MF	GO:0051735	GTP-dependent polynucleotide kinase activity	1	0	1	1	0.34474	0.903657	gene3569(YALI0_D14916g)	-
MF	GO:0051750	delta3,5-delta2,4-dienoyl-CoA isomerase activity	1	0	1	1	0.34474	0.903657	gene304(YALI0_A07733g)	-
MF	GO:0052824	dolichyl-pyrophosphate Man7GlcNAc2 alpha-1,6-mannosyltransferase activity	0	1	1	1	0.34474	0.903657	-	gene1970(YALI0_C02475g)
MF	GO:0052905	tRNA (guanine(9)-N(1))-methyltransferase activity	0	1	1	1	0.34474	0.903657	-	gene6232(YALI0_F12771g)
MF	GO:0052906	tRNA (guanine(37)-N(1))-methyltransferase activity	0	1	1	1	0.34474	0.903657	-	gene3150(YALI0_D05489g)
MF	GO:0052909	18S rRNA (adenine(1779)-N(6)/adenine(1780)-N(6))-dimethyltransferase activity	0	1	1	1	0.34474	0.903657	-	gene4125(YALI0_E00770g)
MF	GO:0061503	tRNA threonylcarbamoyladenosine dehydratase	0	1	1	1	0.34474	0.903657	-	gene6549(YALI0_F19800g)
MF	GO:0061542	3-demethylubiquinone-n 3-O-methyltransferase activity	0	1	1	1	0.34474	0.903657	-	gene1522(YALI0_B15884g)
MF	GO:0061543	3-demethylubiquinone-6 3-O-methyltransferase activity	0	1	1	1	0.34474	0.903657	-	gene1522(YALI0_B15884g)
MF	GO:0061632	RNA lariat debranching enzyme activator activity	0	1	1	1	0.34474	0.903657	-	gene1814(YALI0_B22330g)
MF	GO:0061656	SUMO conjugating enzyme activity	0	1	1	1	0.34474	0.903657	-	gene1828(YALI0_B22638g)
MF	GO:0061710	L-threonylcarbamoyladenylate synthase	0	1	1	1	0.34474	0.903657	-	gene4507(YALI0_E09449g)
MF	GO:0070004	cysteine-type exopeptidase activity	1	0	1	1	0.34474	0.903657	gene4708(YALI0_E13970g)	-
MF	GO:0070037	rRNA (pseudouridine) methyltransferase activity	0	1	1	1	0.34474	0.903657	-	gene4159(YALI0_E01496g)
MF	GO:0070548	L-glutamine aminotransferase activity	1	0	1	1	0.34474	0.903657	gene1772(YALI0_B21428g)	-
MF	GO:0071074	eukaryotic initiation factor eIF2 binding	0	1	1	1	0.34474	0.903657	-	gene3237(YALI0_D07436g)
MF	GO:0071164	RNA trimethylguanosine synthase activity	0	1	1	1	0.34474	0.903657	-	gene1044(YALI0_B04774g)
MF	GO:0090079	translation regulator activity, nucleic acid binding	0	1	1	1	0.34474	0.903657	-	gene265(YALI0_A06765g)
MF	GO:0097177	mitochondrial ribosome binding	0	1	1	1	0.34474	0.903657	-	gene265(YALI0_A06765g)
MF	GO:0102131	3-oxo-glutaryl-[acp] methyl ester reductase activity	0	1	1	1	0.34474	0.903657	-	gene1682(YALI0_B19382g)
MF	GO:0102132	3-oxo-pimeloyl-[acp] methyl ester reductase activity	0	1	1	1	0.34474	0.903657	-	gene1682(YALI0_B19382g)
MF	GO:0102202	soladodine glucosyltransferase activity	1	0	1	1	0.34474	0.903657	gene3715(YALI0_D18403g)	-
MF	GO:0102203	brassicasterol glucosyltransferase activity	1	0	1	1	0.34474	0.903657	gene3715(YALI0_D18403g)	-
MF	GO:0102205	cholesterol allpha-glucosyltransferase activity	1	0	1	1	0.34474	0.903657	gene3715(YALI0_D18403g)	-
MF	GO:0102265	tRNA-dihydrouridine47 synthase activity	0	1	1	1	0.34474	0.903657	-	gene5241(YALI0_E26048g)
MF	GO:0102483	scopolin beta-glucosidase activity	1	0	1	1	0.34474	0.903657	gene5737(YALI0_F01672g)	-
MF	GO:0106050	tRNA 2'-O-methyltransferase activity	0	1	1	1	0.34474	0.903657	-	gene5291(YALI0_E27137g)
MF	GO:0140103	catalytic activity, acting on a glycoprotein	1	0	1	1	0.34474	0.903657	gene6710(YALI0_F23485g)	-
MF	GO:0140107	high-affinity potassium ion transmembrane transporter activity	1	0	1	1	0.34474	0.903657	gene1613(YALI0_B17864g)	-
MF	GO:1901604	dethiobiotin transmembrane transporter activity	0	1	1	1	0.34474	0.903657	-	gene2293(YALI0_C09823g)
MF	GO:1990190	peptide-glutamate-N-acetyltransferase activity	0	1	1	1	0.34474	0.903657	-	gene1084(YALI0_B05742g)
MF	GO:1990275	preribosome binding	0	1	1	1	0.34474	0.903657	-	gene6617(YALI0_F21329g)
MF	GO:1990380	Lys48-specific deubiquitinase activity	1	0	1	1	0.34474	0.903657	gene4708(YALI0_E13970g)	-
MF	GO:1990404	protein ADP-ribosylase activity	1	0	1	1	0.34474	0.903657	gene2591(YALI0_C17061g)	-
MF	GO:1990444	F-box domain binding	1	0	1	1	0.34474	0.903657	gene9(YALI0_A00330g)	-
MF	GO:1990593	nascent polypeptide-associated complex binding	0	1	1	1	0.34474	0.903657	-	gene4731(YALI0_E14487g)
MF	GO:1990883	rRNA cytidine N-acetyltransferase activity	0	1	1	1	0.34474	0.903657	-	gene1470(YALI0_B14751g)
MF	GO:1990886	3,4-dihydroxy-5-polyprenylbenzoic acid O-methyltransferase activity	0	1	1	1	0.34474	0.903657	-	gene1522(YALI0_B15884g)
MF	GO:0052689	carboxylic ester hydrolase activity	7	7	14	36	0.34521	0.903657	gene1175(YALI0_B08030g),gene3272(YALI0_D08206g),gene3677(YALI0_D17534g),gene4797(YALI0_E16060g),gene5655(YALI0_E34881g),gene5837(YALI0_F03927g),gene5950(YALI0_F06358g)	gene2333(YALI0_C10780g),gene3691(YALI0_D17842g),gene5180(YALI0_E24607g),gene5305(YALI0_E27412g),gene5612(YALI0_E33935g),gene5766(YALI0_F02299g),gene919(YALI0_B01771g)
BP	GO:0008204	ergosterol metabolic process	2	7	9	23	0.34555	0.903657	gene1582(YALI0_B17204g),gene5962(YALI0_F06578g)	gene1059(YALI0_B05126g),gene1198(YALI0_B08536g),gene1859(YALI0_B23298g),gene2644(YALI0_C18403g),gene3102(YALI0_D04422g),gene5523(YALI0_E32065g),gene6166(YALI0_F11297g)
BP	GO:0016128	phytosteroid metabolic process	2	7	9	23	0.34555	0.903657	gene1582(YALI0_B17204g),gene5962(YALI0_F06578g)	gene1059(YALI0_B05126g),gene1198(YALI0_B08536g),gene1859(YALI0_B23298g),gene2644(YALI0_C18403g),gene3102(YALI0_D04422g),gene5523(YALI0_E32065g),gene6166(YALI0_F11297g)
BP	GO:0044107	cellular alcohol metabolic process	2	7	9	23	0.34555	0.903657	gene1582(YALI0_B17204g),gene5962(YALI0_F06578g)	gene1059(YALI0_B05126g),gene1198(YALI0_B08536g),gene1859(YALI0_B23298g),gene2644(YALI0_C18403g),gene3102(YALI0_D04422g),gene5523(YALI0_E32065g),gene6166(YALI0_F11297g)
BP	GO:1902652	secondary alcohol metabolic process	2	7	9	23	0.34555	0.903657	gene1582(YALI0_B17204g),gene5962(YALI0_F06578g)	gene1059(YALI0_B05126g),gene1198(YALI0_B08536g),gene1859(YALI0_B23298g),gene2644(YALI0_C18403g),gene3102(YALI0_D04422g),gene5523(YALI0_E32065g),gene6166(YALI0_F11297g)
BP	GO:0000055	ribosomal large subunit export from nucleus	1	3	4	9	0.34781	0.903657	gene1262(YALI0_B10021g)	gene3495(YALI0_D13068g),gene4210(YALI0_E02618g),gene6031(YALI0_F08151g)
BP	GO:0006813	potassium ion transport	3	1	4	9	0.34781	0.903657	gene1613(YALI0_B17864g),gene2314(YALI0_C10311g),gene4598(YALI0_E11473g)	gene4237(YALI0_E03234g)
BP	GO:0007008	outer mitochondrial membrane organization	0	4	4	9	0.34781	0.903657	-	gene2168(YALI0_C06974g),gene278(YALI0_A07084g),gene3108(YALI0_D04554g),gene5457(YALI0_E30745g)
BP	GO:0008298	intracellular mRNA localization	0	4	4	9	0.34781	0.903657	-	gene3151(YALI0_D05511g),gene3769(YALI0_D19624g),gene4291(YALI0_E04444g),gene5574(YALI0_E33121g)
BP	GO:0010972	negative regulation of G2/M transition of mitotic cell cycle	1	3	4	9	0.34781	0.903657	gene1408(YALI0_B13376g)	gene1896(YALI0_C00671g),gene4205(YALI0_E02508g),gene5057(YALI0_E21978g)
BP	GO:0034204	lipid translocation	4	0	4	9	0.34781	0.903657	gene1887(YALI0_C00495g),gene4278(YALI0_E04158g),gene4279(YALI0_E04169g),gene4841(YALI0_E17105g)	-
BP	GO:0034727	piecemeal microautophagy of nucleus	4	0	4	9	0.34781	0.903657	gene1036(YALI0_B04598g),gene2723(YALI0_C20119g),gene5814(YALI0_F03432g),gene5950(YALI0_F06358g)	-
BP	GO:0042743	hydrogen peroxide metabolic process	2	2	4	9	0.34781	0.903657	gene5202(YALI0_E25091g),gene7035(YALI0_F30987g)	gene5627(YALI0_E34265g),gene6581(YALI0_F20504g)
BP	GO:0042744	hydrogen peroxide catabolic process	2	2	4	9	0.34781	0.903657	gene5202(YALI0_E25091g),gene7035(YALI0_F30987g)	gene5627(YALI0_E34265g),gene6581(YALI0_F20504g)
BP	GO:0044818	mitotic G2/M transition checkpoint	1	3	4	9	0.34781	0.903657	gene1408(YALI0_B13376g)	gene1896(YALI0_C00671g),gene4205(YALI0_E02508g),gene5057(YALI0_E21978g)
BP	GO:0046503	glycerolipid catabolic process	3	1	4	9	0.34781	0.903657	gene3272(YALI0_D08206g),gene4797(YALI0_E16060g),gene6036(YALI0_F08217g)	gene919(YALI0_B01771g)
BP	GO:0061013	regulation of mRNA catabolic process	3	1	4	9	0.34781	0.903657	gene317(YALI0_A08063g),gene6066(YALI0_F08943g),gene6765(YALI0_F24717g)	gene4167(YALI0_E01672g)
BP	GO:1902750	negative regulation of cell cycle G2/M phase transition	1	3	4	9	0.34781	0.903657	gene1408(YALI0_B13376g)	gene1896(YALI0_C00671g),gene4205(YALI0_E02508g),gene5057(YALI0_E21978g)
MF	GO:0004518	nuclease activity	8	27	35	95	0.34791	0.903657	gene1775(YALI0_B21494g),gene2884(YALI0_C23727g),gene3456(YALI0_D12166g),gene3794(YALI0_D20240g),gene494(YALI0_A12705g),gene5602(YALI0_E33715g),gene6814(YALI0_F25839g),gene6846(YALI0_F26543g)	gene1043(YALI0_B04752g),gene2029(YALI0_C03784g),gene218(YALI0_A05555g),gene2506(YALI0_C15048g),gene253(YALI0_A06523g),gene3131(YALI0_D05071g),gene3524(YALI0_D13750g),gene3706(YALI0_D18150g),gene3727(YALI0_D18700g),gene4291(YALI0_E04444g),gene4390(YALI0_E06677g),gene493(YALI0_A12683g),gene5087(YALI0_E22671g),gene5267(YALI0_E26587g),gene5304(YALI0_E27390g),gene5351(YALI0_E28490g),gene5357(YALI0_E28…
MF	GO:0016830	carbon-carbon lyase activity	6	4	10	25	0.34835	0.904263	gene1215(YALI0_B08965g),gene1824(YALI0_B22550g),gene2588(YALI0_C16995g),gene3062(YALI0_D03480g),gene3215(YALI0_D06930g),gene844(YALI0_A21417g)	gene3143(YALI0_D05335g),gene3362(YALI0_D10131g),gene4742(YALI0_E14751g),gene6044(YALI0_F08415g)
MF	GO:0000981	RNA polymerase II transcription factor activity, sequence-specific DNA binding	26	4	30	81	0.35129	0.911354	gene1033(YALI0_B04510g),gene1057(YALI0_B05038g),gene1247(YALI0_B09713g),gene1807(YALI0_B22176g),gene2513(YALI0_C15202g),gene2656(YALI0_C18645g),gene2976(YALI0_D01353g),gene3035(YALI0_D02783g),gene3104(YALI0_D04466g),gene3129(YALI0_D05041g),gene3180(YALI0_D06193g),gene3370(YALI0_D10285g),gene3698(YALI0_D17988g),gene3804(YALI0_D20482g),gene421(YALI0_A10637g),gene4245(YALI0_E03410g),gene5165(YALI0_E…	gene2850(YALI0_C22990g),gene3800(YALI0_D20394g),gene3941(YALI0_D23749g),gene4888(YALI0_E18161g)
BP	GO:0006403	RNA localization	4	17	21	58	0.36229	0.939334	gene1262(YALI0_B10021g),gene4353(YALI0_E05819g),gene6066(YALI0_F08943g),gene6765(YALI0_F24717g)	gene278(YALI0_A07084g),gene3151(YALI0_D05511g),gene3495(YALI0_D13068g),gene3769(YALI0_D19624g),gene4210(YALI0_E02618g),gene4291(YALI0_E04444g),gene4297(YALI0_E04576g),gene4463(YALI0_E08448g),gene4593(YALI0_E11363g),gene5499(YALI0_E31625g),gene5574(YALI0_E33121g),gene6023(YALI0_F07953g),gene6031(YALI0_F08151g),gene6759(YALI0_F24563g),gene6827(YALI0_F26136g),gene696(YALI0_A17941g),gene701(YALI0_A18…
MF	GO:0019213	deacetylase activity	4	3	7	17	0.3634	0.941654	gene4977(YALI0_E20163g),gene6806(YALI0_F25663g),gene7028(YALI0_F30833g),gene822(YALI0_A20834g)	gene2125(YALI0_C06061g),gene3009(YALI0_D02145g),gene5055(YALI0_E21934g)
MF	GO:0016893	endonuclease activity, active with either ribo- or deoxyribonucleic acids and producing 5'-phosphomonoesters	4	12	16	42	0.36418	0.943116	gene1775(YALI0_B21494g),gene3794(YALI0_D20240g),gene494(YALI0_A12705g),gene6846(YALI0_F26543g)	gene1043(YALI0_B04752g),gene2029(YALI0_C03784g),gene253(YALI0_A06523g),gene3706(YALI0_D18150g),gene4390(YALI0_E06677g),gene493(YALI0_A12683g),gene5087(YALI0_E22671g),gene5267(YALI0_E26587g),gene5377(YALI0_E29007g),gene579(YALI0_A15059g),gene5969(YALI0_F06732g),gene86(YALI0_A02178g)
CC	GO:0000786	nucleosome	5	0	5	12	0.36553	0.946052	gene1540(YALI0_B16280g),gene5261(YALI0_E26455g),gene5262(YALI0_E26477g),gene6816(YALI0_F25883g),gene6817(YALI0_F25905g)	-
BP	GO:0009092	homoserine metabolic process	5	0	5	12	0.36629	0.946899	gene2942(YALI0_D00605g),gene3671(YALI0_D17402g),gene4000(YALI0_D25168g),gene4128(YALI0_E00836g),gene5926(YALI0_F05874g)	-
BP	GO:0043144	snoRNA processing	0	5	5	12	0.36629	0.946899	-	gene3151(YALI0_D05511g),gene3208(YALI0_D06776g),gene4291(YALI0_E04444g),gene5574(YALI0_E33121g),gene6569(YALI0_F20240g)
BP	GO:0009636	response to toxic substance	8	4	12	32	0.36671	0.947424	gene2096(YALI0_C05467g),gene2571(YALI0_C16621g),gene4196(YALI0_E02310g),gene4958(YALI0_E19745g),gene5202(YALI0_E25091g),gene5929(YALI0_F05940g),gene6465(YALI0_F17974g),gene7035(YALI0_F30987g)	gene1561(YALI0_B16742g),gene1710(YALI0_B20086g),gene5627(YALI0_E34265g),gene6581(YALI0_F20504g)
CC	GO:0000323	lytic vacuole	32	7	39	111	0.36755	0.949034	gene1075(YALI0_B05522g),gene14(YALI0_A00418g),gene1505(YALI0_B15488g),gene1901(YALI0_C00803g),gene1902(YALI0_C00825g),gene2050(YALI0_C04279g),gene2138(YALI0_C06347g),gene2321(YALI0_C10494g),gene2390(YALI0_C12100g),gene2787(YALI0_C21604g),gene2881(YALI0_C23661g),gene3004(YALI0_D02046g),gene3266(YALI0_D08052g),gene3666(YALI0_D17270g),gene3907(YALI0_D22957g),gene4212(YALI0_E02662g),gene4325(YALI0_E0…	gene1759(YALI0_B21142g),gene2396(YALI0_C12232g),gene2426(YALI0_C12980g),gene2629(YALI0_C18051g),gene3865(YALI0_D22000g),gene5986(YALI0_F07106g),gene6441(YALI0_F17446g)
BP	GO:0046700	heterocycle catabolic process	18	22	40	114	0.37131	0.958177	gene1244(YALI0_B09625g),gene1245(YALI0_B09647g),gene1775(YALI0_B21494g),gene1945(YALI0_C01859g),gene316(YALI0_A08041g),gene317(YALI0_A08063g),gene3712(YALI0_D18337g),gene4445(YALI0_E08074g),gene494(YALI0_A12705g),gene5227(YALI0_E25740g),gene5968(YALI0_F06710g),gene6066(YALI0_F08943g),gene6079(YALI0_F09251g),gene6221(YALI0_F12529g),gene6765(YALI0_F24717g),gene6814(YALI0_F25839g),gene6846(YALI0_F26…	gene1197(YALI0_B08514g),gene253(YALI0_A06523g),gene3131(YALI0_D05071g),gene3151(YALI0_D05511g),gene3208(YALI0_D06776g),gene3404(YALI0_D11000g),gene4167(YALI0_E01672g),gene4206(YALI0_E02530g),gene4262(YALI0_E03806g),gene4291(YALI0_E04444g),gene4305(YALI0_E04741g),gene493(YALI0_A12683g),gene5304(YALI0_E27390g),gene5574(YALI0_E33121g),gene579(YALI0_A15059g),gene6337(YALI0_F15147g),gene6391(YALI0_F16…
MF	GO:0008170	N-methyltransferase activity	0	12	12	31	0.37248	0.960629	-	gene1201(YALI0_B08624g),gene2460(YALI0_C13882g),gene3367(YALI0_D10234g),gene3487(YALI0_D12859g),gene3854(YALI0_D21684g),gene4125(YALI0_E00770g),gene4364(YALI0_E06061g),gene5456(YALI0_E30723g),gene6598(YALI0_F20878g),gene6601(YALI0_F20944g),gene6915(YALI0_F28061g),gene7004(YALI0_F30327g)
MF	GO:0004622	lysophospholipase activity	2	2	4	9	0.37789	0.971717	gene3272(YALI0_D08206g),gene4797(YALI0_E16060g)	gene5612(YALI0_E33935g),gene919(YALI0_B01771g)
MF	GO:0005381	iron ion transmembrane transporter activity	0	4	4	9	0.37789	0.971717	-	gene1781(YALI0_B21604g),gene2397(YALI0_C12254g),gene3207(YALI0_D06754g),gene6546(YALI0_F19734g)
MF	GO:0008320	protein transmembrane transporter activity	0	4	4	9	0.37789	0.971717	-	gene278(YALI0_A07084g),gene4759(YALI0_E15136g),gene6958(YALI0_F29183g),gene7046(YALI0_F31207g)
MF	GO:0022884	macromolecule transmembrane transporter activity	0	4	4	9	0.37789	0.971717	-	gene278(YALI0_A07084g),gene4759(YALI0_E15136g),gene6958(YALI0_F29183g),gene7046(YALI0_F31207g)
MF	GO:0046912	transferase activity, transferring acyl groups, acyl groups converted into alkyl on transfer	2	2	4	9	0.37789	0.971717	gene3747(YALI0_D19140g),gene4783(YALI0_E15708g)	gene3972(YALI0_D24431g),gene5650(YALI0_E34793g)
CC	GO:0044815	DNA packaging complex	5	1	6	15	0.37831	0.972226	gene1540(YALI0_B16280g),gene5261(YALI0_E26455g),gene5262(YALI0_E26477g),gene6816(YALI0_F25883g),gene6817(YALI0_F25905g)	gene5953(YALI0_F06402g)
BP	GO:0006613	cotranslational protein targeting to membrane	3	3	6	15	0.37917	0.973292	gene5661(YALI0_E35046g),gene6706(YALI0_F23375g),gene6790(YALI0_F25289g)	gene2670(YALI0_C18997g),gene5629(YALI0_E34309g),gene6626(YALI0_F21505g)
BP	GO:0006614	SRP-dependent cotranslational protein targeting to membrane	3	3	6	15	0.37917	0.973292	gene5661(YALI0_E35046g),gene6706(YALI0_F23375g),gene6790(YALI0_F25289g)	gene2670(YALI0_C18997g),gene5629(YALI0_E34309g),gene6626(YALI0_F21505g)
BP	GO:0042255	ribosome assembly	1	14	15	41	0.38064	0.976492	gene3497(YALI0_D13104g)	gene1016(YALI0_B04136g),gene1344(YALI0_B11880g),gene154(YALI0_A03905g),gene1826(YALI0_B22594g),gene206(YALI0_A05181g),gene251(YALI0_A06479g),gene3284(YALI0_D08470g),gene3869(YALI0_D22088g),gene4715(YALI0_E14124g),gene474(YALI0_A12155g),gene5140(YALI0_E23760g),gene5628(YALI0_E34287g),gene889(YALI0_B01078g),gene925(YALI0_B01892g)
BP	GO:0006979	response to oxidative stress	9	9	18	50	0.39066	0.995165	gene2014(YALI0_C03465g),gene2096(YALI0_C05467g),gene2571(YALI0_C16621g),gene4196(YALI0_E02310g),gene5202(YALI0_E25091g),gene5312(YALI0_E27632g),gene6066(YALI0_F08943g),gene6765(YALI0_F24717g),gene7035(YALI0_F30987g)	gene1006(YALI0_B03916g),gene1561(YALI0_B16742g),gene1710(YALI0_B20086g),gene5428(YALI0_E30151g),gene5447(YALI0_E30547g),gene5627(YALI0_E34265g),gene6581(YALI0_F20504g),gene6592(YALI0_F20746g),gene6621(YALI0_F21406g)
MF	GO:0001012	RNA polymerase II regulatory region DNA binding	11	3	14	37	0.39176	0.995165	gene2403(YALI0_C12364g),gene3104(YALI0_D04466g),gene3116(YALI0_D04785g),gene3370(YALI0_D10285g),gene3804(YALI0_D20482g),gene5318(YALI0_E27742g),gene5512(YALI0_E31845g),gene5890(YALI0_F05126g),gene6505(YALI0_F18788g),gene651(YALI0_A16841g),gene722(YALI0_A18469g)	gene3941(YALI0_D23749g),gene4496(YALI0_E09196g),gene6725(YALI0_F23815g)
BP	GO:1901575	organic substance catabolic process	117	48	165	487	0.39667	0.995165	gene1013(YALI0_B04070g),gene1036(YALI0_B04598g),gene1080(YALI0_B05654g),gene1175(YALI0_B08030g),gene1244(YALI0_B09625g),gene1245(YALI0_B09647g),gene1280(YALI0_B10406g),gene1301(YALI0_B10890g),gene1537(YALI0_B16214g),gene1775(YALI0_B21494g),gene1793(YALI0_B21846g),gene1813(YALI0_B22308g),gene1822(YALI0_B22506g),gene1824(YALI0_B22550g),gene1901(YALI0_C00803g),gene1927(YALI0_C01419g),gene1945(YALI0_…	gene1197(YALI0_B08514g),gene1198(YALI0_B08536g),gene1538(YALI0_B16236g),gene1704(YALI0_B19976g),gene1730(YALI0_B20526g),gene1980(YALI0_C02717g),gene2214(YALI0_C08074g),gene2283(YALI0_C09570g),gene2426(YALI0_C12980g),gene2430(YALI0_C13090g),gene253(YALI0_A06523g),gene2944(YALI0_D00649g),gene3023(YALI0_D02497g),gene3131(YALI0_D05071g),gene3151(YALI0_D05511g),gene3181(YALI0_D06215g),gene3208(YALI0_D…
MF	GO:0016829	lyase activity	17	16	33	91	0.39674	0.995165	gene1215(YALI0_B08965g),gene1280(YALI0_B10406g),gene1537(YALI0_B16214g),gene1681(YALI0_B19360g),gene1824(YALI0_B22550g),gene2588(YALI0_C16995g),gene2942(YALI0_D00605g),gene3062(YALI0_D03480g),gene3215(YALI0_D06930g),gene5926(YALI0_F05874g),gene5968(YALI0_F06710g),gene6534(YALI0_F19470g),gene6653(YALI0_F22121g),gene6937(YALI0_F28567g),gene748(YALI0_A19096g),gene794(YALI0_A20207g),gene844(YALI0_A21…	gene1485(YALI0_B15059g),gene2158(YALI0_C06776g),gene2424(YALI0_C12918g),gene2871(YALI0_C23408g),gene3023(YALI0_D02497g),gene3143(YALI0_D05335g),gene3362(YALI0_D10131g),gene4215(YALI0_E02728g),gene4371(YALI0_E06215g),gene4742(YALI0_E14751g),gene5357(YALI0_E28600g),gene6044(YALI0_F08415g),gene6549(YALI0_F19800g),gene6594(YALI0_F20790g),gene6621(YALI0_F21406g),gene901(YALI0_B01364g)
MF	GO:0043492	ATPase activity, coupled to movement of substances	16	5	21	57	0.40072	0.995165	gene1358(YALI0_B12188g),gene1392(YALI0_B12980g),gene2729(YALI0_C20265g),gene3121(YALI0_D04873g),gene3961(YALI0_D24189g),gene40(YALI0_A01023g),gene4028(YALI0_D25828g),gene4278(YALI0_E04158g),gene4508(YALI0_E09471g),gene4720(YALI0_E14234g),gene4940(YALI0_E19338g),gene5207(YALI0_E25201g),gene6203(YALI0_F12089g),gene6466(YALI0_F17996g),gene7072(YALI0_F31845g),gene957(YALI0_B02684g)	gene2629(YALI0_C18051g),gene4130(YALI0_E00880g),gene4360(YALI0_E05973g),gene449(YALI0_A11473g),gene6566(YALI0_F20174g)
MF	GO:0005216	ion channel activity	3	2	5	12	0.4013	0.995165	gene2718(YALI0_C20053g),gene5162(YALI0_E24211g),gene6131(YALI0_F10461g)	gene4237(YALI0_E03234g),gene4487(YALI0_E09015g)
MF	GO:0008235	metalloexopeptidase activity	5	0	5	12	0.4013	0.995165	gene1075(YALI0_B05522g),gene2321(YALI0_C10494g),gene3921(YALI0_D23309g),gene6398(YALI0_F16489g),gene6792(YALI0_F25333g)	-
MF	GO:0051087	chaperone binding	1	4	5	12	0.4013	0.995165	gene4901(YALI0_E18480g)	gene2651(YALI0_C18513g),gene3393(YALI0_D10769g),gene3831(YALI0_D21142g),gene5838(YALI0_F03949g)
MF	GO:0008270	zinc ion binding	38	25	63	177	0.4027	0.995165	gene1033(YALI0_B04510g),gene1057(YALI0_B05038g),gene1075(YALI0_B05522g),gene1247(YALI0_B09713g),gene1635(YALI0_B18348g),gene2300(YALI0_C10010g),gene2321(YALI0_C10494g),gene2513(YALI0_C15202g),gene2656(YALI0_C18645g),gene2976(YALI0_D01353g),gene3035(YALI0_D02783g),gene3129(YALI0_D05041g),gene3180(YALI0_D06193g),gene3343(YALI0_D09735g),gene3370(YALI0_D10285g),gene3397(YALI0_D10857g),gene3698(YALI0_…	gene1048(YALI0_B04851g),gene1660(YALI0_B18876g),gene2850(YALI0_C22990g),gene2860(YALI0_C23210g),gene321(YALI0_A08151g),gene3495(YALI0_D13068g),gene3563(YALI0_D14762g),gene3800(YALI0_D20394g),gene3832(YALI0_D21164g),gene4496(YALI0_E09196g),gene4699(YALI0_E13728g),gene4871(YALI0_E17787g),gene4877(YALI0_E17919g),gene4888(YALI0_E18161g),gene5287(YALI0_E27049g),gene5317(YALI0_E27720g),gene5447(YALI0_E…
BP	GO:0072657	protein localization to membrane	7	17	24	68	0.40434	0.995165	gene1087(YALI0_B05808g),gene1645(YALI0_B18568g),gene1691(YALI0_B19624g),gene3683(YALI0_D17666g),gene5661(YALI0_E35046g),gene6706(YALI0_F23375g),gene6790(YALI0_F25289g)	gene1692(YALI0_B19646g),gene2168(YALI0_C06974g),gene2670(YALI0_C18997g),gene2795(YALI0_C21780g),gene3108(YALI0_D04554g),gene3214(YALI0_D06908g),gene3304(YALI0_D08866g),gene4173(YALI0_E01804g),gene4321(YALI0_E05115g),gene4372(YALI0_E06237g),gene5457(YALI0_E30745g),gene5629(YALI0_E34309g),gene6259(YALI0_F13387g),gene6626(YALI0_F21505g),gene6909(YALI0_F27929g),gene6985(YALI0_F29931g),gene7079(YALI0_…
MF	GO:0034212	peptide N-acetyltransferase activity	5	5	10	26	0.40445	0.995165	gene1375(YALI0_B12584g),gene2467(YALI0_C14058g),gene3452(YALI0_D12078g),gene869(YALI0_B00638g),gene916(YALI0_B01716g)	gene1084(YALI0_B05742g),gene1377(YALI0_B12628g),gene2366(YALI0_C11539g),gene6051(YALI0_F08591g),gene6209(YALI0_F12221g)
CC	GO:0000214	tRNA-intron endonuclease complex	0	2	2	4	0.40565	0.995165	-	gene5357(YALI0_E28600g),gene714(YALI0_A18293g)
CC	GO:0000408	EKC/KEOPS complex	0	2	2	4	0.40565	0.995165	-	gene3261(YALI0_D07920g),gene6089(YALI0_F09471g)
CC	GO:0000939	condensed chromosome inner kinetochore	2	0	2	4	0.40565	0.995165	gene2902(YALI0_C24123g),gene5553(YALI0_E32659g)	-
CC	GO:0001405	presequence translocase-associated import motor	0	2	2	4	0.40565	0.995165	-	gene1391(YALI0_B12958g),gene2651(YALI0_C18513g)
CC	GO:0005775	vacuolar lumen	2	0	2	4	0.40565	0.995165	gene6398(YALI0_F16489g),gene6792(YALI0_F25333g)	-
CC	GO:0035145	exon-exon junction complex	0	2	2	4	0.40565	0.995165	-	gene4206(YALI0_E02530g),gene909(YALI0_B01562g)
CC	GO:0071541	eukaryotic translation initiation factor 3 complex, eIF3m	0	2	2	4	0.40565	0.995165	-	gene2557(YALI0_C16247g),gene6512(YALI0_F18942g)
BP	GO:0000083	regulation of transcription involved in G1/S transition of mitotic cell cycle	2	0	2	4	0.40612	0.995165	gene6399(YALI0_F16511g),gene822(YALI0_A20834g)	-
BP	GO:0000272	polysaccharide catabolic process	2	0	2	4	0.40612	0.995165	gene1036(YALI0_B04598g),gene5737(YALI0_F01672g)	-
BP	GO:0000379	tRNA-type intron splice site recognition and cleavage	0	2	2	4	0.40612	0.995165	-	gene5357(YALI0_E28600g),gene714(YALI0_A18293g)
BP	GO:0002188	translation reinitiation	0	2	2	4	0.40612	0.995165	-	gene2557(YALI0_C16247g),gene6512(YALI0_F18942g)
BP	GO:0006048	UDP-N-acetylglucosamine biosynthetic process	2	0	2	4	0.40612	0.995165	gene1927(YALI0_C01419g),gene3790(YALI0_D20152g)	-
BP	GO:0006561	proline biosynthetic process	2	0	2	4	0.40612	0.995165	gene2057(YALI0_C04433g),gene753(YALI0_A19206g)	-
BP	GO:0006641	triglyceride metabolic process	1	1	2	4	0.40612	0.995165	gene3264(YALI0_D07986g)	gene411(YALI0_A10362g)
BP	GO:0006655	phosphatidylglycerol biosynthetic process	0	2	2	4	0.40612	0.995165	-	gene4714(YALI0_E14102g),gene6726(YALI0_F23837g)
BP	GO:0006821	chloride transport	1	1	2	4	0.40612	0.995165	gene2718(YALI0_C20053g)	gene4487(YALI0_E09015g)
BP	GO:0006828	manganese ion transport	2	0	2	4	0.40612	0.995165	gene4070(YALI0_D26818g),gene4508(YALI0_E09471g)	-
BP	GO:0007105	cytokinesis, site selection	2	0	2	4	0.40612	0.995165	gene2070(YALI0_C04774g),gene6069(YALI0_F09009g)	-
BP	GO:0009095	aromatic amino acid family biosynthetic process, prephenate pathway	2	0	2	4	0.40612	0.995165	gene2088(YALI0_C05258g),gene5013(YALI0_E20977g)	-
BP	GO:0009157	deoxyribonucleoside monophosphate biosynthetic process	1	1	2	4	0.40612	0.995165	gene2339(YALI0_C10901g)	gene2860(YALI0_C23210g)
BP	GO:0009162	deoxyribonucleoside monophosphate metabolic process	1	1	2	4	0.40612	0.995165	gene2339(YALI0_C10901g)	gene2860(YALI0_C23210g)
BP	GO:0009164	nucleoside catabolic process	2	0	2	4	0.40612	0.995165	gene6221(YALI0_F12529g),gene7005(YALI0_F30349g)	-
BP	GO:0009219	pyrimidine deoxyribonucleotide metabolic process	1	1	2	4	0.40612	0.995165	gene2339(YALI0_C10901g)	gene2860(YALI0_C23210g)
BP	GO:0009221	pyrimidine deoxyribonucleotide biosynthetic process	1	1	2	4	0.40612	0.995165	gene2339(YALI0_C10901g)	gene2860(YALI0_C23210g)
BP	GO:0009251	glucan catabolic process	2	0	2	4	0.40612	0.995165	gene1036(YALI0_B04598g),gene5737(YALI0_F01672g)	-
BP	GO:0009265	2'-deoxyribonucleotide biosynthetic process	1	1	2	4	0.40612	0.995165	gene2339(YALI0_C10901g)	gene2860(YALI0_C23210g)
BP	GO:0009268	response to pH	1	1	2	4	0.40612	0.995165	gene1836(YALI0_B22814g)	gene1123(YALI0_B06710g)
BP	GO:0009394	2'-deoxyribonucleotide metabolic process	1	1	2	4	0.40612	0.995165	gene2339(YALI0_C10901g)	gene2860(YALI0_C23210g)
BP	GO:0010212	response to ionizing radiation	1	1	2	4	0.40612	0.995165	gene2241(YALI0_C08701g)	gene3077(YALI0_D03888g)
BP	GO:0010610	regulation of mRNA stability involved in response to stress	2	0	2	4	0.40612	0.995165	gene6066(YALI0_F08943g),gene6765(YALI0_F24717g)	-
BP	GO:0015695	organic cation transport	2	0	2	4	0.40612	0.995165	gene1019(YALI0_B04202g),gene2541(YALI0_C15807g)	-
BP	GO:0015801	aromatic amino acid transport	1	1	2	4	0.40612	0.995165	gene2390(YALI0_C12100g)	gene5986(YALI0_F07106g)
BP	GO:0015825	L-serine transport	1	1	2	4	0.40612	0.995165	gene2390(YALI0_C12100g)	gene5986(YALI0_F07106g)
BP	GO:0015828	tyrosine transport	1	1	2	4	0.40612	0.995165	gene2390(YALI0_C12100g)	gene5986(YALI0_F07106g)
BP	GO:0015866	ADP transport	1	1	2	4	0.40612	0.995165	gene6545(YALI0_F19712g)	gene422(YALI0_A10659g)
BP	GO:0016233	telomere capping	1	1	2	4	0.40612	0.995165	gene3456(YALI0_D12166g)	gene4205(YALI0_E02508g)
BP	GO:0019692	deoxyribose phosphate metabolic process	1	1	2	4	0.40612	0.995165	gene2339(YALI0_C10901g)	gene2860(YALI0_C23210g)
BP	GO:0030970	retrograde protein transport, ER to cytosol	2	0	2	4	0.40612	0.995165	gene5485(YALI0_E31339g),gene6206(YALI0_F12155g)	-
BP	GO:0031440	regulation of mRNA 3'-end processing	0	2	2	4	0.40612	0.995165	-	gene4496(YALI0_E09196g),gene6725(YALI0_F23815g)
BP	GO:0032049	cardiolipin biosynthetic process	0	2	2	4	0.40612	0.995165	-	gene4714(YALI0_E14102g),gene6726(YALI0_F23837g)
BP	GO:0032186	cellular bud neck septin ring organization	2	0	2	4	0.40612	0.995165	gene2070(YALI0_C04774g),gene6069(YALI0_F09009g)	-
BP	GO:0032329	serine transport	1	1	2	4	0.40612	0.995165	gene2390(YALI0_C12100g)	gene5986(YALI0_F07106g)
BP	GO:0033499	galactose catabolic process via UDP-galactose	0	2	2	4	0.40612	0.995165	-	gene2283(YALI0_C09570g),gene2430(YALI0_C13090g)
BP	GO:0035725	sodium ion transmembrane transport	2	0	2	4	0.40612	0.995165	gene4189(YALI0_E02156g),gene5146(YALI0_E23859g)	-
BP	GO:0042816	vitamin B6 metabolic process	1	1	2	4	0.40612	0.995165	gene4996(YALI0_E20603g)	gene3544(YALI0_D14322g)
BP	GO:0042819	vitamin B6 biosynthetic process	1	1	2	4	0.40612	0.995165	gene4996(YALI0_E20603g)	gene3544(YALI0_D14322g)
BP	GO:0042822	pyridoxal phosphate metabolic process	1	1	2	4	0.40612	0.995165	gene4996(YALI0_E20603g)	gene3544(YALI0_D14322g)
BP	GO:0042823	pyridoxal phosphate biosynthetic process	1	1	2	4	0.40612	0.995165	gene4996(YALI0_E20603g)	gene3544(YALI0_D14322g)
BP	GO:0043649	dicarboxylic acid catabolic process	1	1	2	4	0.40612	0.995165	gene4513(YALI0_E09603g)	gene6044(YALI0_F08415g)
BP	GO:0044247	cellular polysaccharide catabolic process	2	0	2	4	0.40612	0.995165	gene1036(YALI0_B04598g),gene5737(YALI0_F01672g)	-
BP	GO:0046337	phosphatidylethanolamine metabolic process	1	1	2	4	0.40612	0.995165	gene3062(YALI0_D03480g)	gene1660(YALI0_B18876g)
BP	GO:0046385	deoxyribose phosphate biosynthetic process	1	1	2	4	0.40612	0.995165	gene2339(YALI0_C10901g)	gene2860(YALI0_C23210g)
BP	GO:0046655	folic acid metabolic process	2	0	2	4	0.40612	0.995165	gene3886(YALI0_D22484g),gene4809(YALI0_E16346g)	-
BP	GO:0048015	phosphatidylinositol-mediated signaling	1	1	2	4	0.40612	0.995165	gene2046(YALI0_C04180g)	gene5334(YALI0_E28153g)
BP	GO:0055075	potassium ion homeostasis	2	0	2	4	0.40612	0.995165	gene1613(YALI0_B17864g),gene4189(YALI0_E02156g)	-
BP	GO:0071421	manganese ion transmembrane transport	2	0	2	4	0.40612	0.995165	gene4070(YALI0_D26818g),gene4508(YALI0_E09471g)	-
BP	GO:0071467	cellular response to pH	1	1	2	4	0.40612	0.995165	gene1836(YALI0_B22814g)	gene1123(YALI0_B06710g)
BP	GO:0072337	modified amino acid transport	0	2	2	4	0.40612	0.995165	-	gene5975(YALI0_F06842g),gene652(YALI0_A16863g)
BP	GO:0089709	L-histidine transmembrane transport	1	1	2	4	0.40612	0.995165	gene2390(YALI0_C12100g)	gene5986(YALI0_F07106g)
BP	GO:1901568	fatty acid derivative metabolic process	2	0	2	4	0.40612	0.995165	gene1824(YALI0_B22550g),gene6848(YALI0_F26587g)	-
BP	GO:1902022	L-lysine transport	1	1	2	4	0.40612	0.995165	gene2390(YALI0_C12100g)	gene5986(YALI0_F07106g)
BP	GO:1902023	L-arginine transport	1	1	2	4	0.40612	0.995165	gene2390(YALI0_C12100g)	gene5986(YALI0_F07106g)
BP	GO:1902024	L-histidine transport	1	1	2	4	0.40612	0.995165	gene2390(YALI0_C12100g)	gene5986(YALI0_F07106g)
BP	GO:1902476	chloride transmembrane transport	1	1	2	4	0.40612	0.995165	gene2718(YALI0_C20053g)	gene4487(YALI0_E09015g)
BP	GO:1903400	L-arginine transmembrane transport	1	1	2	4	0.40612	0.995165	gene2390(YALI0_C12100g)	gene5986(YALI0_F07106g)
BP	GO:1903401	L-lysine transmembrane transport	1	1	2	4	0.40612	0.995165	gene2390(YALI0_C12100g)	gene5986(YALI0_F07106g)
BP	GO:1903513	endoplasmic reticulum to cytosol transport	2	0	2	4	0.40612	0.995165	gene5485(YALI0_E31339g),gene6206(YALI0_F12155g)	-
BP	GO:2000815	regulation of mRNA stability involved in response to oxidative stress	2	0	2	4	0.40612	0.995165	gene6066(YALI0_F08943g),gene6765(YALI0_F24717g)	-
BP	GO:2001057	reactive nitrogen species metabolic process	0	2	2	4	0.40612	0.995165	-	gene1996(YALI0_C03069g),gene3612(YALI0_D15928g)
BP	GO:0000096	sulfur amino acid metabolic process	9	1	10	27	0.40745	0.996748	gene2942(YALI0_D00605g),gene3671(YALI0_D17402g),gene4000(YALI0_D25168g),gene4128(YALI0_E00836g),gene4656(YALI0_E12683g),gene559(YALI0_A14498g),gene5926(YALI0_F05874g),gene5929(YALI0_F05940g),gene6465(YALI0_F17974g)	gene6805(YALI0_F25641g)
BP	GO:0016125	sterol metabolic process	3	7	10	27	0.40745	0.996748	gene1582(YALI0_B17204g),gene3715(YALI0_D18403g),gene5962(YALI0_F06578g)	gene1059(YALI0_B05126g),gene1198(YALI0_B08536g),gene1859(YALI0_B23298g),gene2644(YALI0_C18403g),gene3102(YALI0_D04422g),gene5523(YALI0_E32065g),gene6166(YALI0_F11297g)
BP	GO:0043241	protein complex disassembly	3	7	10	27	0.40745	0.996748	gene6206(YALI0_F12155g),gene6241(YALI0_F13035g),gene7018(YALI0_F30613g)	gene1757(YALI0_B21098g),gene3871(YALI0_D22132g),gene4496(YALI0_E09196g),gene5091(YALI0_E22759g),gene6725(YALI0_F23815g),gene696(YALI0_A17941g),gene909(YALI0_B01562g)
MF	GO:0004177	aminopeptidase activity	6	0	6	15	0.41851	1	gene1075(YALI0_B05522g),gene1689(YALI0_B19580g),gene2321(YALI0_C10494g),gene3921(YALI0_D23309g),gene4687(YALI0_E13464g),gene5855(YALI0_F04290g)	-
MF	GO:0004601	peroxidase activity	4	2	6	15	0.41851	1	gene4196(YALI0_E02310g),gene4958(YALI0_E19745g),gene5202(YALI0_E25091g),gene7035(YALI0_F30987g)	gene5627(YALI0_E34265g),gene6581(YALI0_F20504g)
MF	GO:0015267	channel activity	4	2	6	15	0.41851	1	gene2718(YALI0_C20053g),gene4346(YALI0_E05665g),gene5162(YALI0_E24211g),gene6131(YALI0_F10461g)	gene4237(YALI0_E03234g),gene4487(YALI0_E09015g)
MF	GO:0016684	oxidoreductase activity, acting on peroxide as acceptor	4	2	6	15	0.41851	1	gene4196(YALI0_E02310g),gene4958(YALI0_E19745g),gene5202(YALI0_E25091g),gene7035(YALI0_F30987g)	gene5627(YALI0_E34265g),gene6581(YALI0_F20504g)
MF	GO:0016831	carboxy-lyase activity	3	3	6	15	0.41851	1	gene2588(YALI0_C16995g),gene3062(YALI0_D03480g),gene3215(YALI0_D06930g)	gene3143(YALI0_D05335g),gene3362(YALI0_D10131g),gene6044(YALI0_F08415g)
MF	GO:0022803	passive transmembrane transporter activity	4	2	6	15	0.41851	1	gene2718(YALI0_C20053g),gene4346(YALI0_E05665g),gene5162(YALI0_E24211g),gene6131(YALI0_F10461g)	gene4237(YALI0_E03234g),gene4487(YALI0_E09015g)
MF	GO:0000287	magnesium ion binding	9	9	18	49	0.42142	1	gene1661(YALI0_B18898g),gene1681(YALI0_B19360g),gene1887(YALI0_C00495g),gene3215(YALI0_D06930g),gene4278(YALI0_E04158g),gene4279(YALI0_E04169g),gene4841(YALI0_E17105g),gene494(YALI0_A12705g),gene6846(YALI0_F26543g)	gene1682(YALI0_B19382g),gene1876(YALI0_C00253g),gene2085(YALI0_C05170g),gene2377(YALI0_C11803g),gene253(YALI0_A06523g),gene3362(YALI0_D10131g),gene579(YALI0_A15059g),gene6822(YALI0_F26037g),gene878(YALI0_B00836g)
BP	GO:0071166	ribonucleoprotein complex localization	4	10	14	39	0.42142	1	gene1262(YALI0_B10021g),gene4353(YALI0_E05819g),gene6066(YALI0_F08943g),gene6765(YALI0_F24717g)	gene3495(YALI0_D13068g),gene4210(YALI0_E02618g),gene4297(YALI0_E04576g),gene4463(YALI0_E08448g),gene5499(YALI0_E31625g),gene6031(YALI0_F08151g),gene6759(YALI0_F24563g),gene6827(YALI0_F26136g),gene696(YALI0_A17941g),gene701(YALI0_A18007g)
BP	GO:0071426	ribonucleoprotein complex export from nucleus	4	10	14	39	0.42142	1	gene1262(YALI0_B10021g),gene4353(YALI0_E05819g),gene6066(YALI0_F08943g),gene6765(YALI0_F24717g)	gene3495(YALI0_D13068g),gene4210(YALI0_E02618g),gene4297(YALI0_E04576g),gene4463(YALI0_E08448g),gene5499(YALI0_E31625g),gene6031(YALI0_F08151g),gene6759(YALI0_F24563g),gene6827(YALI0_F26136g),gene696(YALI0_A17941g),gene701(YALI0_A18007g)
BP	GO:0006644	phospholipid metabolic process	19	19	38	110	0.42167	1	gene1930(YALI0_C01485g),gene3062(YALI0_D03480g),gene3184(YALI0_D06281g),gene3272(YALI0_D08206g),gene4095(YALI0_E00110g),gene4532(YALI0_E10021g),gene4797(YALI0_E16060g),gene4812(YALI0_E16434g),gene4922(YALI0_E18942g),gene5498(YALI0_E31603g),gene5655(YALI0_E34881g),gene5665(YALI0_E35222g),gene5837(YALI0_F03927g),gene6036(YALI0_F08217g),gene6183(YALI0_F11649g),gene6207(YALI0_F12177g),gene643(YALI0_A…	gene1526(YALI0_B15972g),gene1660(YALI0_B18876g),gene2343(YALI0_C10989g),gene2466(YALI0_C14036g),gene3092(YALI0_D04202g),gene3691(YALI0_D17842g),gene4044(YALI0_D26235g),gene411(YALI0_A10362g),gene4364(YALI0_E06061g),gene4714(YALI0_E14102g),gene4729(YALI0_E14443g),gene490(YALI0_A12573g),gene5055(YALI0_E21934g),gene5266(YALI0_E26565g),gene5334(YALI0_E28153g),gene6726(YALI0_F23837g),gene6811(YALI0_F2…
CC	GO:0032592	integral component of mitochondrial membrane	2	13	15	42	0.42247	1	gene2497(YALI0_C14806g),gene6753(YALI0_F24431g)	gene278(YALI0_A07084g),gene3992(YALI0_D24992g),gene4731(YALI0_E14487g),gene4759(YALI0_E15136g),gene4782(YALI0_E15686g),gene5457(YALI0_E30745g),gene6114(YALI0_F10054g),gene6139(YALI0_F10615g),gene6259(YALI0_F13387g),gene6752(YALI0_F24409g),gene6799(YALI0_F25509g),gene6958(YALI0_F29183g),gene7079(YALI0_F32021g)
CC	GO:0031902	late endosome membrane	2	1	3	7	0.42707	1	gene2138(YALI0_C06347g),gene5950(YALI0_F06358g)	gene4463(YALI0_E08448g)
CC	GO:0045239	tricarboxylic acid cycle enzyme complex	2	1	3	7	0.42707	1	gene3295(YALI0_D08690g),gene5886(YALI0_F05038g)	gene2158(YALI0_C06776g)
BP	GO:0000750	pheromone-dependent signal transduction involved in conjugation with cellular fusion	2	1	3	7	0.42769	1	gene261(YALI0_A06699g),gene5700(YALI0_F00858g)	gene4816(YALI0_E16533g)
BP	GO:0000912	assembly of actomyosin apparatus involved in cytokinesis	2	1	3	7	0.42769	1	gene2070(YALI0_C04774g),gene6069(YALI0_F09009g)	gene6007(YALI0_F07601g)
BP	GO:0000915	actomyosin contractile ring assembly	2	1	3	7	0.42769	1	gene2070(YALI0_C04774g),gene6069(YALI0_F09009g)	gene6007(YALI0_F07601g)
BP	GO:0006207	'de novo' pyrimidine nucleobase biosynthetic process	0	3	3	7	0.42769	1	-	gene2895(YALI0_C23969g),gene3234(YALI0_D07370g),gene4509(YALI0_E09493g)
BP	GO:0006771	riboflavin metabolic process	3	0	3	7	0.42769	1	gene1215(YALI0_B08965g),gene3195(YALI0_D06501g),gene3274(YALI0_D08250g)	-
BP	GO:0009226	nucleotide-sugar biosynthetic process	3	0	3	7	0.42769	1	gene1635(YALI0_B18348g),gene1927(YALI0_C01419g),gene3790(YALI0_D20152g)	-
BP	GO:0009231	riboflavin biosynthetic process	3	0	3	7	0.42769	1	gene1215(YALI0_B08965g),gene3195(YALI0_D06501g),gene3274(YALI0_D08250g)	-
BP	GO:0009310	amine catabolic process	1	2	3	7	0.42769	1	gene3493(YALI0_D13024g)	gene4262(YALI0_E03806g),gene965(YALI0_B02852g)
BP	GO:0018198	peptidyl-cysteine modification	0	3	3	7	0.42769	1	-	gene2631(YALI0_C18095g),gene4173(YALI0_E01804g),gene6849(YALI0_F26609g)
BP	GO:0031032	actomyosin structure organization	2	1	3	7	0.42769	1	gene2070(YALI0_C04774g),gene6069(YALI0_F09009g)	gene6007(YALI0_F07601g)
[truncated: 2,563 more rows]

## Sheet: Sheet2
Table S6: GO functional enrichment of all the differentially expressed genes.
[truncated: 339 more rows]
