# Supplementary material for: Metabolome and Transcriptome Profiling Reveal Carbon Metabolic Flux Changes in Yarrowia lipolytica Cells to Rapamycin
Source: J Fungi (Basel). 2022 Sep 6;8(9):939. doi: 10.3390/jof8090939 (PMC9504542; doi:10.3390/jof8090939)
Supplement: Supplementary file 1 [file jof-08-00939-s001.zip › Table S7.xlsx]

## Sheet: Sheet1
Table S7: KEGG pathway enrichment analysis.
PathwayID	Pathway	Level1	Level2	Up_number	Down_number	DEG_number	total_number	Pvalue	FDR	Up_gene	Down_gene	URL
yli00280	Valine, leucine and isoleucine degradation	Metabolism	Amino acid metabolism	16	2	18	23	5.7594e-06	0.000313409	gene1280(YALI0_B10406g),gene898(YALI0_B01298g),gene4905(YALI0_E18568g),gene3295(YALI0_D08690g),gene5778(YALI0_F02607g),gene5886(YALI0_F05038g),gene4581(YALI0_E11099g),gene1464(YALI0_B14619g),gene2972(YALI0_D01265g),gene4650(YALI0_E12573g),gene1945(YALI0_C01859g),gene4891(YALI0_E18238g),gene1824(YALI0_B22550g),gene6848(YALI0_F26587g),gene6653(YALI0_F22121g),gene3945(YALI0_D23815g)	gene1198(YALI0_B08536g),gene3181(YALI0_D06215g)	http://www.kegg.jp/kegg-bin/show_pathway?map00280/K00166%09%23FFFFFF,red/K00167%09%23FFFFFF,red/K01640%09%23FFFFFF,red/K01968%09%23FFFFFF,red/K00020%09%23FFFFFF,red/K00253%09%23FFFFFF,red/K00626%09%23FFFFFF,purple/K09699%09%23FFFFFF,red/K00128%09%23FFFFFF,red/K05607%09%23FFFFFF,red/K00140%09%23FFFFFF,red/K01027%09%23FFFFFF,red/K13524%09%23FFFFFF,red/K05605%09%23FFFFFF,green/K07511%09%23FFFFFF,red…
yli00360	Phenylalanine metabolism	Metabolism	Amino acid metabolism	13	1	14	16	6.08561e-06	0.000313409	gene4615(YALI0_E11847g),gene1720(YALI0_B20328g),gene5862(YALI0_F04444g),gene6394(YALI0_F16401g),gene1793(YALI0_B21846g),gene5013(YALI0_E20977g),gene2246(YALI0_C08811g),gene2088(YALI0_C05258g),gene2841(YALI0_C22792g),gene5649(YALI0_E34771g),gene3262(YALI0_D07942g),gene2641(YALI0_C18315g),gene6963(YALI0_F29337g)	gene5826(YALI0_F03663g)	http://www.kegg.jp/kegg-bin/show_pathway?map00360/K00457%09%23FFFFFF,red/K18852%09%23FFFFFF,red/K10437%09%23FFFFFF,green/K00838%09%23FFFFFF,red/K00074%09%23FFFFFF,red/K00276%09%23FFFFFF,red/K00129%09%23FFFFFF,red/K01426%09%23FFFFFF,red/K14454%09%23FFFFFF,red/K05821%09%23FFFFFF,red/
yli03008	Ribosome biogenesis in eukaryotes	Genetic Information Processing	Translation	1	39	40	72	2.14133e-05	0.000735189	gene1262(YALI0_B10021g)	gene139(YALI0_A03509g),gene4159(YALI0_E01496g),gene6243(YALI0_F13068g),gene1049(YALI0_B04862g),gene5377(YALI0_E29007g),gene5400(YALI0_E29506g),gene5522(YALI0_E32043g),gene6681(YALI0_F22759g),gene218(YALI0_A05555g),gene1906(YALI0_C00913g),gene7058(YALI0_F31471g),gene1043(YALI0_B04752g),gene86(YALI0_A02178g),gene4165(YALI0_E01628g),gene3058(YALI0_D03355g),gene6438(YALI0_F17380g),gene6916(YALI0_F280…	http://www.kegg.jp/kegg-bin/show_pathway?map03008/K03538%09%23FFFFFF,green/K14557%09%23FFFFFF,green/K12619%09%23FFFFFF,green/K14552%09%23FFFFFF,green/K03539%09%23FFFFFF,green/K14284%09%23FFFFFF,green/K07178%09%23FFFFFF,green/K14561%09%23FFFFFF,green/K14553%09%23FFFFFF,green/K14575%09%23FFFFFF,green/K14568%09%23FFFFFF,green/K14559%09%23FFFFFF,green/K14556%09%23FFFFFF,green/K14560%09%23FFFFFF,green…
yli00250	Alanine, aspartate and glutamate metabolism	Metabolism	Amino acid metabolism	12	5	17	24	9.41739e-05	0.00242498	gene4513(YALI0_E09603g),gene6831(YALI0_F26191g),gene1245(YALI0_B09647g),gene4891(YALI0_E18238g),gene6458(YALI0_F17820g),gene3186(YALI0_D06325g),gene1706(YALI0_B19998g),gene3493(YALI0_D13024g),gene1772(YALI0_B21428g),gene1153(YALI0_B07359g),gene6963(YALI0_F29337g),gene5685(YALI0_F00506g)	gene2895(YALI0_C23969g),gene3234(YALI0_D07370g),gene520(YALI0_A13387g),gene4509(YALI0_E09493g),gene6044(YALI0_F08415g)	http://www.kegg.jp/kegg-bin/show_pathway?map00250/K01955%09%23FFFFFF,green/K00135%09%23FFFFFF,red/K00814%09%23FFFFFF,red/K00294%09%23FFFFFF,red/K14454%09%23FFFFFF,red/K01953%09%23FFFFFF,green/K15371%09%23FFFFFF,red/K00262%09%23FFFFFF,red/K13524%09%23FFFFFF,red/K01580%09%23FFFFFF,green/K01915%09%23FFFFFF,red/K13566%09%23FFFFFF,red/K00820%09%23FFFFFF,red/K00264%09%23FFFFFF,red/K11541%09%23FFFFFF,gr…
yli00350	Tyrosine metabolism	Metabolism	Amino acid metabolism	12	1	13	17	0.000193029	0.00397639	gene6831(YALI0_F26191g),gene5862(YALI0_F04444g),gene583(YALI0_A15147g),gene1793(YALI0_B21846g),gene633(YALI0_A16379g),gene5013(YALI0_E20977g),gene2088(YALI0_C05258g),gene976(YALI0_B03124g),gene2841(YALI0_C22792g),gene3262(YALI0_D07942g),gene2641(YALI0_C18315g),gene6963(YALI0_F29337g)	gene4871(YALI0_E17787g)	http://www.kegg.jp/kegg-bin/show_pathway?map00350/K00457%09%23FFFFFF,red/K00838%09%23FFFFFF,red/K00135%09%23FFFFFF,red/K00545%09%23FFFFFF,red/K13953%09%23FFFFFF,purple/K00276%09%23FFFFFF,red/K00129%09%23FFFFFF,red/K14454%09%23FFFFFF,red/K05821%09%23FFFFFF,red/
yli00910	Nitrogen metabolism	Metabolism	Energy metabolism	5	1	6	6	0.00102337	0.0117716	gene4513(YALI0_E09603g),gene6458(YALI0_F17820g),gene1706(YALI0_B19998g),gene3493(YALI0_D13024g),gene5685(YALI0_F00506g)	gene6621(YALI0_F21406g)	http://www.kegg.jp/kegg-bin/show_pathway?map00910/K00262%09%23FFFFFF,red/K00264%09%23FFFFFF,red/K01915%09%23FFFFFF,red/K15371%09%23FFFFFF,red/K01673%09%23FFFFFF,green/
yli00650	Butanoate metabolism	Metabolism	Carbohydrate metabolism	7	3	10	13	0.00106651	0.0117716	gene1280(YALI0_B10406g),gene6831(YALI0_F26191g),gene4581(YALI0_E11099g),gene2246(YALI0_C08811g),gene4891(YALI0_E18238g),gene1824(YALI0_B22550g),gene6848(YALI0_F26587g)	gene1198(YALI0_B08536g),gene1876(YALI0_C00253g),gene6044(YALI0_F08415g)	http://www.kegg.jp/kegg-bin/show_pathway?map00650/K13524%09%23FFFFFF,red/K01580%09%23FFFFFF,green/K00074%09%23FFFFFF,red/K01640%09%23FFFFFF,red/K00135%09%23FFFFFF,red/K07511%09%23FFFFFF,red/K01652%09%23FFFFFF,green/K00626%09%23FFFFFF,purple/K01027%09%23FFFFFF,red/
yli00071	Fatty acid degradation	Metabolism	Lipid metabolism	11	2	13	19	0.00110915	0.0117716	gene1280(YALI0_B10406g),gene5562(YALI0_E32835g),gene898(YALI0_B01298g),gene4905(YALI0_E18568g),gene2890(YALI0_C23859g),gene583(YALI0_A15147g),gene3984(YALI0_D24750g),gene4581(YALI0_E11099g),gene633(YALI0_A16379g),gene6722(YALI0_F23749g),gene6147(YALI0_F10857g)	gene1198(YALI0_B08536g),gene4871(YALI0_E17787g)	http://www.kegg.jp/kegg-bin/show_pathway?map00071/K13953%09%23FFFFFF,purple/K00232%09%23FFFFFF,red/K07513%09%23FFFFFF,red/K00128%09%23FFFFFF,red/K00626%09%23FFFFFF,purple/K07511%09%23FFFFFF,red/K00252%09%23FFFFFF,red/
yli00640	Propanoate metabolism	Metabolism	Carbohydrate metabolism	7	4	11	15	0.00113514	0.0117716	gene1280(YALI0_B10406g),gene3295(YALI0_D08690g),gene5886(YALI0_F05038g),gene4581(YALI0_E11099g),gene1945(YALI0_C01859g),gene4891(YALI0_E18238g),gene3945(YALI0_D23815g)	gene1198(YALI0_B08536g),gene5930(YALI0_F05962g),gene2360(YALI0_C11407g),gene3181(YALI0_D06215g)	http://www.kegg.jp/kegg-bin/show_pathway?map00640/K00166%09%23FFFFFF,red/K13524%09%23FFFFFF,red/K11262%09%23FFFFFF,green/K00167%09%23FFFFFF,red/K05605%09%23FFFFFF,green/K07511%09%23FFFFFF,red/K01895%09%23FFFFFF,green/K09699%09%23FFFFFF,red/K00626%09%23FFFFFF,purple/K00140%09%23FFFFFF,red/
yli00410	beta-Alanine metabolism	Metabolism	Metabolism of other amino acids	9	3	12	17	0.00114288	0.0117716	gene1280(YALI0_B10406g),gene898(YALI0_B01298g),gene5862(YALI0_F04444g),gene1865(YALI0_B23430g),gene1945(YALI0_C01859g),gene4891(YALI0_E18238g),gene2841(YALI0_C22792g),gene3262(YALI0_D07942g),gene2641(YALI0_C18315g)	gene3181(YALI0_D06215g),gene1096(YALI0_B06006g),gene6044(YALI0_F08415g)	http://www.kegg.jp/kegg-bin/show_pathway?map00410/K13524%09%23FFFFFF,red/K01580%09%23FFFFFF,green/K05605%09%23FFFFFF,green/K07511%09%23FFFFFF,red/K13367%09%23FFFFFF,red/K00276%09%23FFFFFF,red/K00129%09%23FFFFFF,red/K00128%09%23FFFFFF,red/K01918%09%23FFFFFF,green/K00140%09%23FFFFFF,red/
yli00290	Valine, leucine and isoleucine biosynthesis	Metabolism	Amino acid metabolism	2	6	8	11	0.00632238	0.0592005	gene1537(YALI0_B16214g),gene2972(YALI0_D01265g)	gene1876(YALI0_C00253g),gene3050(YALI0_D03135g),gene1883(YALI0_C00407g),gene3023(YALI0_D02497g),gene901(YALI0_B01364g),gene2871(YALI0_C23408g)	http://www.kegg.jp/kegg-bin/show_pathway?map00290/K01754%09%23FFFFFF,green/K17989%09%23FFFFFF,red/K01652%09%23FFFFFF,green/K01687%09%23FFFFFF,green/K00826%09%23FFFFFF,red/K01702%09%23FFFFFF,green/K00053%09%23FFFFFF,green/K00052%09%23FFFFFF,green/
yli00380	Tryptophan metabolism	Metabolism	Amino acid metabolism	9	4	13	22	0.00733212	0.0629341	gene1280(YALI0_B10406g),gene4615(YALI0_E11847g),gene898(YALI0_B01298g),gene6394(YALI0_F16401g),gene4581(YALI0_E11099g),gene5013(YALI0_E20977g),gene5649(YALI0_E34771g),gene6722(YALI0_F23749g),gene7035(YALI0_F30987g)	gene1198(YALI0_B08536g),gene4262(YALI0_E03806g),gene965(YALI0_B02852g),gene5627(YALI0_E34265g)	http://www.kegg.jp/kegg-bin/show_pathway?map00380/K00452%09%23FFFFFF,green/K00838%09%23FFFFFF,red/K03781%09%23FFFFFF,purple/K07511%09%23FFFFFF,red/K14263%09%23FFFFFF,green/K01426%09%23FFFFFF,red/K00626%09%23FFFFFF,purple/K00128%09%23FFFFFF,red/K00252%09%23FFFFFF,red/
yli00630	Glyoxylate and dicarboxylate metabolism	Metabolism	Carbohydrate metabolism	13	7	20	39	0.00853635	0.0676341	gene4663(YALI0_E12859g),gene4581(YALI0_E11099g),gene4809(YALI0_E16346g),gene4722(YALI0_E14256g),gene3493(YALI0_D13024g),gene1822(YALI0_B22506g),gene389(YALI0_A09856g),gene4783(YALI0_E15708g),gene3886(YALI0_D22484g),gene3747(YALI0_D19140g),gene7035(YALI0_F30987g),gene5685(YALI0_F00506g),gene5789(YALI0_F02849g)	gene1198(YALI0_B08536g),gene5930(YALI0_F05962g),gene4262(YALI0_E03806g),gene2214(YALI0_C08074g),gene5627(YALI0_E34265g),gene6945(YALI0_F28765g),gene1704(YALI0_B19976g)	http://www.kegg.jp/kegg-bin/show_pathway?map00630/K01915%09%23FFFFFF,red/K03781%09%23FFFFFF,purple/K00600%09%23FFFFFF,red/K14263%09%23FFFFFF,green/K00605%09%23FFFFFF,red/K00281%09%23FFFFFF,red/K01895%09%23FFFFFF,green/K00626%09%23FFFFFF,purple/K01638%09%23FFFFFF,red/K22133%09%23FFFFFF,red/K00122%09%23FFFFFF,purple/
yli00730	Thiamine metabolism	Metabolism	Metabolism of cofactors and vitamins	3	5	8	12	0.0137133	0.0952979	gene5554(YALI0_E32681g),gene5029(YALI0_E21351g),gene5665(YALI0_E35222g)	gene4281(YALI0_E04224g),gene872(YALI0_B00704g),gene2532(YALI0_C15554g),gene490(YALI0_A12573g),gene6811(YALI0_F25773g)	http://www.kegg.jp/kegg-bin/show_pathway?map00730/K00877%09%23FFFFFF,green/K00949%09%23FFFFFF,red/K14394%09%23FFFFFF,red/K01078%09%23FFFFFF,purple/K14154%09%23FFFFFF,green/K00939%09%23FFFFFF,green/
yli00592	alpha-Linolenic acid metabolism	Metabolism	Lipid metabolism	5	0	5	6	0.0142577	0.0952979	gene5562(YALI0_E32835g),gene4905(YALI0_E18568g),gene2890(YALI0_C23859g),gene3984(YALI0_D24750g),gene6147(YALI0_F10857g)	-	http://www.kegg.jp/kegg-bin/show_pathway?map00592/K00232%09%23FFFFFF,red/K07513%09%23FFFFFF,red/
yli00130	Ubiquinone and other terpenoid-quinone biosynthesis	Metabolism	Metabolism of cofactors and vitamins	3	4	7	10	0.0148036	0.0952979	gene2700(YALI0_C19646g),gene1793(YALI0_B21846g),gene5013(YALI0_E20977g)	gene1522(YALI0_B15884g),gene4763(YALI0_E15224g),gene2636(YALI0_C18205g),gene356(YALI0_A09042g)	http://www.kegg.jp/kegg-bin/show_pathway?map00130/K00457%09%23FFFFFF,red/K03809%09%23FFFFFF,red/K06126%09%23FFFFFF,green/K00838%09%23FFFFFF,red/K06127%09%23FFFFFF,green/K00591%09%23FFFFFF,green/K06134%09%23FFFFFF,green/
yli03020	RNA polymerase	Genetic Information Processing	Transcription	0	15	15	29	0.0197996	0.119962	-	gene5149(YALI0_E23947g),gene5808(YALI0_F03300g),gene5941(YALI0_F06182g),gene1048(YALI0_B04851g),gene6081(YALI0_F09295g),gene4326(YALI0_E05225g),gene3193(YALI0_D06457g),gene3254(YALI0_D07788g),gene3761(YALI0_D19448g),gene2993(YALI0_D01782g),gene6053(YALI0_F08635g),gene6277(YALI0_F13783g),gene321(YALI0_A08151g),gene6445(YALI0_F17534g),gene4524(YALI0_E09845g)	http://www.kegg.jp/kegg-bin/show_pathway?map03020/K03025%09%23FFFFFF,green/K03000%09%23FFFFFF,green/K14721%09%23FFFFFF,green/K03013%09%23FFFFFF,green/K03005%09%23FFFFFF,green/K03023%09%23FFFFFF,green/K03024%09%23FFFFFF,green/K03004%09%23FFFFFF,green/K02999%09%23FFFFFF,green/K03003%09%23FFFFFF,green/K03026%09%23FFFFFF,green/K03017%09%23FFFFFF,green/K03002%09%23FFFFFF,green/K03027%09%23FFFFFF,green…
yli00220	Arginine biosynthesis	Metabolism	Amino acid metabolism	8	1	9	15	0.0223271	0.127761	gene4513(YALI0_E09603g),gene4425(YALI0_E07535g),gene4414(YALI0_E07271g),gene6458(YALI0_F17820g),gene3186(YALI0_D06325g),gene3493(YALI0_D13024g),gene5685(YALI0_F00506g),gene6963(YALI0_F29337g)	gene3568(YALI0_D14894g)	http://www.kegg.jp/kegg-bin/show_pathway?map00220/K00262%09%23FFFFFF,red/K00611%09%23FFFFFF,green/K01915%09%23FFFFFF,red/K14541%09%23FFFFFF,red/K01476%09%23FFFFFF,red/K00814%09%23FFFFFF,red/K14454%09%23FFFFFF,red/K15371%09%23FFFFFF,red/
yli00970	Aminoacyl-tRNA biosynthesis	Genetic Information Processing	Translation	1	18	19	40	0.0266843	0.144657	gene3106(YALI0_D04510g)	gene5973(YALI0_F06820g),gene4673(YALI0_E13123g),gene2652(YALI0_C18535g),gene4313(YALI0_E04939g),gene2645(YALI0_C18425g),gene6981(YALI0_F29843g),gene3599(YALI0_D15620g),gene5766(YALI0_F02299g),gene369(YALI0_A09427g),gene2333(YALI0_C10780g),gene5383(YALI0_E29139g),gene3936(YALI0_D23639g),gene3067(YALI0_D03619g),gene4880(YALI0_E17985g),gene5180(YALI0_E24607g),gene1092(YALI0_B05918g),gene6841(YALI0_F…	http://www.kegg.jp/kegg-bin/show_pathway?map00970/K01887%09%23FFFFFF,green/K01870%09%23FFFFFF,green/K04567%09%23FFFFFF,green/K00604%09%23FFFFFF,green/K01876%09%23FFFFFF,green/K01875%09%23FFFFFF,green/K14237%09%23FFFFFF,red/K01892%09%23FFFFFF,green/K01867%09%23FFFFFF,green/K01889%09%23FFFFFF,green/K01866%09%23FFFFFF,green/K01868%09%23FFFFFF,green/K01893%09%23FFFFFF,green/K01869%09%23FFFFFF,green/K…
yli00450	Selenocompound metabolism	Metabolism	Metabolism of other amino acids	4	2	6	9	0.0335256	0.172657	gene5926(YALI0_F05874g),gene4656(YALI0_E12683g),gene3671(YALI0_D17402g),gene2942(YALI0_D00605g)	gene6981(YALI0_F29843g),gene3067(YALI0_D03619g)	http://www.kegg.jp/kegg-bin/show_pathway?map00450/K01760%09%23FFFFFF,red/K00549%09%23FFFFFF,red/K01758%09%23FFFFFF,red/K01739%09%23FFFFFF,red/K01874%09%23FFFFFF,green/
yli04122	Sulfur relay system	Genetic Information Processing	Folding, sorting and degradation	2	3	5	7	0.0368545	0.177882	gene5202(YALI0_E25091g),gene4947(YALI0_E19481g)	gene1273(YALI0_B10263g),gene2631(YALI0_C18095g),gene3680(YALI0_D17600g)	http://www.kegg.jp/kegg-bin/show_pathway?map04122/K14171%09%23FFFFFF,red/K14169%09%23FFFFFF,green/K11996%09%23FFFFFF,green/K12161%09%23FFFFFF,red/K14168%09%23FFFFFF,green/
yli00072	Synthesis and degradation of ketone bodies	Metabolism	Lipid metabolism	3	1	4	5	0.0379942	0.177882	gene4581(YALI0_E11099g),gene1824(YALI0_B22550g),gene6848(YALI0_F26587g)	gene1198(YALI0_B08536g)	http://www.kegg.jp/kegg-bin/show_pathway?map00072/K00626%09%23FFFFFF,purple/K01640%09%23FFFFFF,red/K01027%09%23FFFFFF,red/
yli00330	Arginine and proline metabolism	Metabolism	Amino acid metabolism	12	0	12	24	0.0477543	0.213856	gene4615(YALI0_E11847g),gene898(YALI0_B01298g),gene1245(YALI0_B09647g),gene4425(YALI0_E07535g),gene6394(YALI0_F16401g),gene1865(YALI0_B23430g),gene753(YALI0_A19206g),gene5649(YALI0_E34771g),gene2057(YALI0_C04433g),gene1244(YALI0_B09625g),gene4531(YALI0_E09999g),gene6963(YALI0_F29337g)	-	http://www.kegg.jp/kegg-bin/show_pathway?map00330/K00819%09%23FFFFFF,red/K00931%09%23FFFFFF,red/K00318%09%23FFFFFF,red/K22842%09%23FFFFFF,red/K01476%09%23FFFFFF,red/K13367%09%23FFFFFF,red/K00294%09%23FFFFFF,red/K01426%09%23FFFFFF,red/K14454%09%23FFFFFF,red/K00128%09%23FFFFFF,red/
yli01040	Biosynthesis of unsaturated fatty acids	Metabolism	Lipid metabolism	6	1	7	12	0.0519508	0.222956	gene5562(YALI0_E32835g),gene4905(YALI0_E18568g),gene2890(YALI0_C23859g),gene3984(YALI0_D24750g),gene2922(YALI0_D00176g),gene6147(YALI0_F10857g)	gene1268(YALI0_B10153g)	http://www.kegg.jp/kegg-bin/show_pathway?map01040/K08764%09%23FFFFFF,red/K00232%09%23FFFFFF,red/K10256%09%23FFFFFF,green/K07513%09%23FFFFFF,red/
yli00520	Amino sugar and nucleotide sugar metabolism	Metabolism	Carbohydrate metabolism	14	2	16	35	0.058217	0.239854	gene3790(YALI0_D20152g),gene5865(YALI0_F04532g),gene1813(YALI0_B22308g),gene3016(YALI0_D02321g),gene7028(YALI0_F30833g),gene4033(YALI0_D25938g),gene1635(YALI0_B18348g),gene1772(YALI0_B21428g),gene4979(YALI0_E20207g),gene3052(YALI0_D03179g),gene1927(YALI0_C01419g),gene3882(YALI0_D22396g),gene4773(YALI0_E15488g),gene4977(YALI0_E20163g)	gene2430(YALI0_C13090g),gene3143(YALI0_D05335g)	http://www.kegg.jp/kegg-bin/show_pathway?map00520/K01452%09%23FFFFFF,red/K00698%09%23FFFFFF,red/K01443%09%23FFFFFF,red/K08678%09%23FFFFFF,green/K00844%09%23FFFFFF,red/K00621%09%23FFFFFF,red/K00820%09%23FFFFFF,red/K00012%09%23FFFFFF,red/K00849%09%23FFFFFF,green/K01809%09%23FFFFFF,red/K02564%09%23FFFFFF,red/K01183%09%23FFFFFF,red/
yli00740	Riboflavin metabolism	Metabolism	Metabolism of cofactors and vitamins	4	3	7	13	0.0824201	0.303464	gene5554(YALI0_E32681g),gene3195(YALI0_D06501g),gene1215(YALI0_B08965g),gene5665(YALI0_E35222g)	gene6208(YALI0_F12199g),gene490(YALI0_A12573g),gene6811(YALI0_F25773g)	http://www.kegg.jp/kegg-bin/show_pathway?map00740/K14655%09%23FFFFFF,green/K14394%09%23FFFFFF,red/K01078%09%23FFFFFF,purple/K02858%09%23FFFFFF,red/K14654%09%23FFFFFF,red/
yli00670	One carbon pool by folate	Metabolism	Metabolism of cofactors and vitamins	6	1	7	13	0.0824201	0.303464	gene4809(YALI0_E16346g),gene1353(YALI0_B12078g),gene4138(YALI0_E01056g),gene2339(YALI0_C10901g),gene3886(YALI0_D22484g),gene5789(YALI0_F02849g)	gene5973(YALI0_F06820g)	http://www.kegg.jp/kegg-bin/show_pathway?map00670/K00560%09%23FFFFFF,red/K00604%09%23FFFFFF,green/K00605%09%23FFFFFF,red/K00288%09%23FFFFFF,red/K00295%09%23FFFFFF,red/K00600%09%23FFFFFF,red/
yli00860	Porphyrin and chlorophyll metabolism	Metabolism	Metabolism of cofactors and vitamins	1	8	9	18	0.082495	0.303464	gene6534(YALI0_F19470g)	gene5421(YALI0_E29975g),gene2424(YALI0_C12918g),gene6721(YALI0_F23727g),gene6849(YALI0_F26609g),gene4371(YALI0_E06215g),gene6762(YALI0_F24651g),gene6594(YALI0_F20790g),gene4877(YALI0_E17919g)	http://www.kegg.jp/kegg-bin/show_pathway?map00860/K01698%09%23FFFFFF,green/K02257%09%23FFFFFF,green/K01772%09%23FFFFFF,red/K00228%09%23FFFFFF,green/K01764%09%23FFFFFF,green/K01885%09%23FFFFFF,green/K01749%09%23FFFFFF,green/K02259%09%23FFFFFF,green/
yli00460	Cyanoamino acid metabolism	Metabolism	Metabolism of other amino acids	4	0	4	6	0.0854673	0.303556	gene2745(YALI0_C20669g),gene4809(YALI0_E16346g),gene3886(YALI0_D22484g),gene5737(YALI0_F01672g)	-	http://www.kegg.jp/kegg-bin/show_pathway?map00460/K00681%09%23FFFFFF,red/K00600%09%23FFFFFF,red/K05349%09%23FFFFFF,red/
yli00310	Lysine degradation	Metabolism	Amino acid metabolism	7	2	9	19	0.11408	0.391674	gene2324(YALI0_C10604g),gene1280(YALI0_B10406g),gene6831(YALI0_F26191g),gene4581(YALI0_E11099g),gene898(YALI0_B01298g),gene6722(YALI0_F23749g),gene4340(YALI0_E05533g)	gene1198(YALI0_B08536g),gene3854(YALI0_D21684g)	http://www.kegg.jp/kegg-bin/show_pathway?map00310/K18854%09%23FFFFFF,red/K00474%09%23FFFFFF,red/K00135%09%23FFFFFF,red/K07511%09%23FFFFFF,red/K06101%09%23FFFFFF,green/K00128%09%23FFFFFF,red/K00626%09%23FFFFFF,purple/K00252%09%23FFFFFF,red/
yli00770	Pantothenate and CoA biosynthesis	Metabolism	Metabolism of cofactors and vitamins	2	5	7	14	0.121063	0.392778	gene1661(YALI0_B18898g),gene2972(YALI0_D01265g)	gene6599(YALI0_F20900g),gene1876(YALI0_C00253g),gene1096(YALI0_B06006g),gene3050(YALI0_D03135g),gene2871(YALI0_C23408g)	http://www.kegg.jp/kegg-bin/show_pathway?map00770/K00077%09%23FFFFFF,green/K00826%09%23FFFFFF,red/K00053%09%23FFFFFF,green/K01918%09%23FFFFFF,green/K00606%09%23FFFFFF,red/K01652%09%23FFFFFF,green/K01687%09%23FFFFFF,green/
yli02010	ABC transporters	Environmental Information Processing	Membrane transport	2	3	5	9	0.122028	0.392778	gene1358(YALI0_B12188g),gene6466(YALI0_F17996g)	gene6566(YALI0_F20174g),gene449(YALI0_A11473g),gene4360(YALI0_E05973g)	http://www.kegg.jp/kegg-bin/show_pathway?map02010/K08712%09%23FFFFFF,red/K05658%09%23FFFFFF,purple/
yli00052	Galactose metabolism	Metabolism	Carbohydrate metabolism	4	2	6	12	0.147978	0.455273	gene1813(YALI0_B22308g),gene5273(YALI0_E26719g),gene4979(YALI0_E20207g),gene4773(YALI0_E15488g)	gene2430(YALI0_C13090g),gene2283(YALI0_C09570g)	http://www.kegg.jp/kegg-bin/show_pathway?map00052/K00849%09%23FFFFFF,green/K01193%09%23FFFFFF,red/K01785%09%23FFFFFF,green/K00844%09%23FFFFFF,red/
yli00061	Fatty acid biosynthesis	Metabolism	Lipid metabolism	0	4	4	7	0.150284	0.455273	-	gene2360(YALI0_C11407g),gene7021(YALI0_F30679g),gene1682(YALI0_B19382g),gene1485(YALI0_B15059g)	http://www.kegg.jp/kegg-bin/show_pathway?map00061/K11262%09%23FFFFFF,green/K00667%09%23FFFFFF,green/K00668%09%23FFFFFF,green/K09458%09%23FFFFFF,green/
yli00590	Arachidonic acid metabolism	Metabolism	Lipid metabolism	2	1	3	5	0.187498	0.551779	gene57(YALI0_A01441g),gene2861(YALI0_C23224g)	gene4965(YALI0_E19899g)	http://www.kegg.jp/kegg-bin/show_pathway?map00590/K08726%09%23FFFFFF,purple/
yli00660	C5-Branched dibasic acid metabolism	Metabolism	Carbohydrate metabolism	0	2	2	3	0.238948	0.677759	-	gene1876(YALI0_C00253g),gene1883(YALI0_C00407g)	http://www.kegg.jp/kegg-bin/show_pathway?map00660/K01652%09%23FFFFFF,green/K00052%09%23FFFFFF,green/
yli00620	Pyruvate metabolism	Metabolism	Carbohydrate metabolism	6	6	12	31	0.257961	0.677759	gene898(YALI0_B01298g),gene4581(YALI0_E11099g),gene4783(YALI0_E15708g),gene2588(YALI0_C16995g),gene3747(YALI0_D19140g),gene4236(YALI0_E03212g)	gene1198(YALI0_B08536g),gene5930(YALI0_F05962g),gene2360(YALI0_C11407g),gene4908(YALI0_E18634g),gene2158(YALI0_C06776g),gene5467(YALI0_E30965g)	http://www.kegg.jp/kegg-bin/show_pathway?map00620/K11262%09%23FFFFFF,green/K01679%09%23FFFFFF,green/K01610%09%23FFFFFF,red/K00102%09%23FFFFFF,red/K01895%09%23FFFFFF,green/K00626%09%23FFFFFF,purple/K00128%09%23FFFFFF,red/K01638%09%23FFFFFF,red/K01067%09%23FFFFFF,green/K00027%09%23FFFFFF,green/
yli00564	Glycerophospholipid metabolism	Metabolism	Lipid metabolism	5	8	13	34	0.261745	0.677759	gene6036(YALI0_F08217g),gene6516(YALI0_F19052g),gene5655(YALI0_E34881g),gene3062(YALI0_D03480g),gene4797(YALI0_E16060g)	gene2466(YALI0_C14036g),gene4833(YALI0_E16907g),gene4364(YALI0_E06061g),gene2343(YALI0_C10989g),gene6726(YALI0_F23837g),gene4714(YALI0_E14102g),gene3691(YALI0_D17842g),gene4729(YALI0_E14443g)	http://www.kegg.jp/kegg-bin/show_pathway?map00564/K16368%09%23FFFFFF,red/K18694%09%23FFFFFF,red/K01613%09%23FFFFFF,red/K00995%09%23FFFFFF,green/K13333%09%23FFFFFF,red/K08744%09%23FFFFFF,green/K16369%09%23FFFFFF,green/K13511%09%23FFFFFF,green/K00981%09%23FFFFFF,green/K00994%09%23FFFFFF,green/K00866%09%23FFFFFF,green/K13535%09%23FFFFFF,purple/
yli00010	Glycolysis / Gluconeogenesis	Metabolism	Carbohydrate metabolism	10	4	14	37	0.264857	0.677759	gene898(YALI0_B01298g),gene1813(YALI0_B22308g),gene5862(YALI0_F04444g),gene583(YALI0_A15147g),gene633(YALI0_A16379g),gene3262(YALI0_D07942g),gene4979(YALI0_E20207g),gene3215(YALI0_D06930g),gene2588(YALI0_C16995g),gene4773(YALI0_E15488g)	gene5930(YALI0_F05962g),gene3362(YALI0_D10131g),gene4871(YALI0_E17787g),gene2283(YALI0_C09570g)	http://www.kegg.jp/kegg-bin/show_pathway?map00010/K01568%09%23FFFFFF,purple/K00844%09%23FFFFFF,red/K01610%09%23FFFFFF,red/K13953%09%23FFFFFF,purple/K00129%09%23FFFFFF,red/K00128%09%23FFFFFF,red/K01785%09%23FFFFFF,green/K01895%09%23FFFFFF,green/
yli00920	Sulfur metabolism	Metabolism	Energy metabolism	6	0	6	14	0.266501	0.677759	gene4810(YALI0_E16368g),gene3671(YALI0_D17402g),gene4000(YALI0_D25168g),gene7005(YALI0_F30349g),gene1180(YALI0_B08140g),gene4128(YALI0_E00836g)	-	http://www.kegg.jp/kegg-bin/show_pathway?map00920/K00988%09%23FFFFFF,red/K00641%09%23FFFFFF,red/K00390%09%23FFFFFF,red/K00380%09%23FFFFFF,red/K01739%09%23FFFFFF,red/K17069%09%23FFFFFF,red/
yli04146	Peroxisome	Cellular Processes	Transport and catabolism	14	4	18	49	0.272737	0.677759	gene5562(YALI0_E32835g),gene4905(YALI0_E18568g),gene57(YALI0_A01441g),gene2890(YALI0_C23859g),gene2571(YALI0_C16621g),gene3984(YALI0_D24750g),gene862(YALI0_B00462g),gene304(YALI0_A07733g),gene2888(YALI0_C23815g),gene1824(YALI0_B22550g),gene2861(YALI0_C23224g),gene2922(YALI0_D00176g),gene6147(YALI0_F10857g),gene7035(YALI0_F30987g)	gene4965(YALI0_E19899g),gene5627(YALI0_E34265g),gene1710(YALI0_B20086g),gene1561(YALI0_B16742g)	http://www.kegg.jp/kegg-bin/show_pathway?map04146/K13348%09%23FFFFFF,red/K04564%09%23FFFFFF,purple/K12663%09%23FFFFFF,red/K01640%09%23FFFFFF,red/K01796%09%23FFFFFF,red/K03781%09%23FFFFFF,purple/K08726%09%23FFFFFF,purple/K08764%09%23FFFFFF,red/K00232%09%23FFFFFF,red/K07513%09%23FFFFFF,red/
yli00100	Steroid biosynthesis	Metabolism	Lipid metabolism	3	4	7	17	0.277166	0.677759	gene5962(YALI0_F06578g),gene1582(YALI0_B17204g),gene5521(YALI0_E32035g)	gene6166(YALI0_F11297g),gene5523(YALI0_E32065g),gene1859(YALI0_B23298g),gene1059(YALI0_B05126g)	http://www.kegg.jp/kegg-bin/show_pathway?map00100/K09829%09%23FFFFFF,purple/K01052%09%23FFFFFF,red/K00222%09%23FFFFFF,green/K05917%09%23FFFFFF,green/K07750%09%23FFFFFF,green/K00637%09%23FFFFFF,red/
yli00780	Biotin metabolism	Metabolism	Metabolism of cofactors and vitamins	2	1	3	6	0.289528	0.677759	gene3589(YALI0_D15400g),gene4859(YALI0_E17545g)	gene7021(YALI0_F30679g)	http://www.kegg.jp/kegg-bin/show_pathway?map00780/K01012%09%23FFFFFF,red/K09458%09%23FFFFFF,green/K00652%09%23FFFFFF,red/
yli00430	Taurine and hypotaurine metabolism	Metabolism	Metabolism of other amino acids	2	1	3	6	0.289528	0.677759	gene4513(YALI0_E09603g),gene2745(YALI0_C20669g)	gene6044(YALI0_F08415g)	http://www.kegg.jp/kegg-bin/show_pathway?map00430/K00681%09%23FFFFFF,red/K01580%09%23FFFFFF,green/K15371%09%23FFFFFF,red/
yli00791	Atrazine degradation	Metabolism	Xenobiotics biodegradation and metabolism	1	0	1	1	0.317972	0.727803	gene4414(YALI0_E07271g)	-	http://www.kegg.jp/kegg-bin/show_pathway?map00791/K14541%09%23FFFFFF,red/
yli00563	Glycosylphosphatidylinositol (GPI)-anchor biosynthesis	Metabolism	Glycan biosynthesis and metabolism	4	5	9	24	0.343177	0.768417	gene5837(YALI0_F03927g),gene1930(YALI0_C01485g),gene6183(YALI0_F11649g),gene4532(YALI0_E10021g)	gene825(YALI0_A20922g),gene4044(YALI0_D26235g),gene5055(YALI0_E21934g),gene3092(YALI0_D04202g),gene1526(YALI0_B15972g)	http://www.kegg.jp/kegg-bin/show_pathway?map00563/K05286%09%23FFFFFF,green/K05284%09%23FFFFFF,green/K01127%09%23FFFFFF,green/K05294%09%23FFFFFF,red/K03434%09%23FFFFFF,green/K03860%09%23FFFFFF,red/K08098%09%23FFFFFF,red/K07542%09%23FFFFFF,red/K05310%09%23FFFFFF,green/
yli00270	Cysteine and methionine metabolism	Metabolism	Amino acid metabolism	12	1	13	37	0.389655	0.841684	gene1537(YALI0_B16214g),gene559(YALI0_A14498g),gene5013(YALI0_E20977g),gene5926(YALI0_F05874g),gene4656(YALI0_E12683g),gene2972(YALI0_D01265g),gene3671(YALI0_D17402g),gene4000(YALI0_D25168g),gene2942(YALI0_D00605g),gene4128(YALI0_E00836g),gene5427(YALI0_E30129g),gene6963(YALI0_F29337g)	gene6805(YALI0_F25641g)	http://www.kegg.jp/kegg-bin/show_pathway?map00270/K01760%09%23FFFFFF,red/K00549%09%23FFFFFF,red/K17989%09%23FFFFFF,red/K00838%09%23FFFFFF,red/K11204%09%23FFFFFF,red/K08967%09%23FFFFFF,red/K00826%09%23FFFFFF,red/K00641%09%23FFFFFF,red/K01758%09%23FFFFFF,red/K14454%09%23FFFFFF,red/K01739%09%23FFFFFF,red/K00547%09%23FFFFFF,green/K17069%09%23FFFFFF,red/
yli04136	Autophagy - other	Cellular Processes	Transport and catabolism	6	2	8	22	0.398432	0.841684	gene2723(YALI0_C20119g),gene4010(YALI0_D25388g),gene4212(YALI0_E02662g),gene5173(YALI0_E24453g),gene1036(YALI0_B04598g),gene5814(YALI0_F03432g)	gene3925(YALI0_D23386g),gene384(YALI0_A09768g)	http://www.kegg.jp/kegg-bin/show_pathway?map04136/K17606%09%23FFFFFF,green/K08331%09%23FFFFFF,red/K08330%09%23FFFFFF,red/K08343%09%23FFFFFF,red/K17888%09%23FFFFFF,green/K08269%09%23FFFFFF,red/K08337%09%23FFFFFF,red/K08341%09%23FFFFFF,red/
yli00340	Histidine metabolism	Metabolism	Amino acid metabolism	4	2	6	16	0.400413	0.841684	gene898(YALI0_B01298g),gene5862(YALI0_F04444g),gene3262(YALI0_D07942g),gene4499(YALI0_E09262g)	gene2085(YALI0_C05170g),gene3228(YALI0_D07238g)	http://www.kegg.jp/kegg-bin/show_pathway?map00340/K00129%09%23FFFFFF,red/K19787%09%23FFFFFF,green/K00765%09%23FFFFFF,green/K00128%09%23FFFFFF,red/K20247%09%23FFFFFF,red/
yli00750	Vitamin B6 metabolism	Metabolism	Metabolism of cofactors and vitamins	2	1	3	8	0.493712	0.995537	gene4996(YALI0_E20603g),gene5752(YALI0_F02013g)	gene3544(YALI0_D14322g)	http://www.kegg.jp/kegg-bin/show_pathway?map00750/K08681%09%23FFFFFF,red/K05275%09%23FFFFFF,red/K00275%09%23FFFFFF,green/
yli00790	Folate biosynthesis	Metabolism	Metabolism of cofactors and vitamins	1	2	3	8	0.493712	0.995537	gene3620(YALI0_D16269g)	gene212(YALI0_A05379g),gene396(YALI0_A10032g)	http://www.kegg.jp/kegg-bin/show_pathway?map00790/K02619%09%23FFFFFF,red/K13950%09%23FFFFFF,green/K20457%09%23FFFFFF,green/
yli00053	Ascorbate and aldarate metabolism	Metabolism	Carbohydrate metabolism	2	0	2	5	0.508503	0.995537	gene898(YALI0_B01298g),gene3016(YALI0_D02321g)	-	http://www.kegg.jp/kegg-bin/show_pathway?map00053/K00012%09%23FFFFFF,red/K00128%09%23FFFFFF,red/
yli00500	Starch and sucrose metabolism	Metabolism	Carbohydrate metabolism	7	1	8	24	0.512267	0.995537	gene1813(YALI0_B22308g),gene5903(YALI0_F05390g),gene5273(YALI0_E26719g),gene4979(YALI0_E20207g),gene4325(YALI0_E05203g),gene4773(YALI0_E15488g),gene5737(YALI0_F01672g)	gene3598(YALI0_D15598g)	http://www.kegg.jp/kegg-bin/show_pathway?map00500/K01193%09%23FFFFFF,red/K01194%09%23FFFFFF,green/K01178%09%23FFFFFF,red/K00844%09%23FFFFFF,red/K01210%09%23FFFFFF,red/K05349%09%23FFFFFF,red/
yli00332	Carbapenem biosynthesis	Metabolism	Biosynthesis of other secondary metabolites	1	0	1	2	0.534905	1	gene753(YALI0_A19206g)	-	http://www.kegg.jp/kegg-bin/show_pathway?map00332/K00931%09%23FFFFFF,red/
yli00260	Glycine, serine and threonine metabolism	Metabolism	Amino acid metabolism	9	1	10	31	0.545751	1	gene1537(YALI0_B16214g),gene5926(YALI0_F05874g),gene4809(YALI0_E16346g),gene2841(YALI0_C22792g),gene389(YALI0_A09856g),gene3886(YALI0_D22484g),gene2641(YALI0_C18315g),gene844(YALI0_A21417g),gene5789(YALI0_F02849g)	gene3023(YALI0_D02497g)	http://www.kegg.jp/kegg-bin/show_pathway?map00260/K01754%09%23FFFFFF,green/K17989%09%23FFFFFF,red/K00600%09%23FFFFFF,red/K01758%09%23FFFFFF,red/K00605%09%23FFFFFF,red/K00276%09%23FFFFFF,red/K00281%09%23FFFFFF,red/K01620%09%23FFFFFF,red/
yli03060	Protein export	Genetic Information Processing	Folding, sorting and degradation	1	5	6	19	0.593973	1	gene6706(YALI0_F23375g)	gene7079(YALI0_F32021g),gene5629(YALI0_E34309g),gene1305(YALI0_B10978g),gene6626(YALI0_F21505g),gene2670(YALI0_C18997g)	http://www.kegg.jp/kegg-bin/show_pathway?map03060/K03107%09%23FFFFFF,green/K03108%09%23FFFFFF,green/K13431%09%23FFFFFF,red/K09648%09%23FFFFFF,green/K03217%09%23FFFFFF,green/K03105%09%23FFFFFF,green/
yli04070	Phosphatidylinositol signaling system	Environmental Information Processing	Signal transduction	4	2	6	19	0.593973	1	gene2046(YALI0_C04180g),gene6100(YALI0_F09746g),gene99(YALI0_A02453g),gene1319(YALI0_B11286g)	gene5334(YALI0_E28153g),gene4729(YALI0_E14443g)	http://www.kegg.jp/kegg-bin/show_pathway?map04070/K00915%09%23FFFFFF,red/K05857%09%23FFFFFF,red/K00981%09%23FFFFFF,green/K13711%09%23FFFFFF,red/K00888%09%23FFFFFF,green/K02677%09%23FFFFFF,red/
yli00240	Pyrimidine metabolism	Metabolism	Nucleotide metabolism	5	4	9	29	0.604725	1	gene325(YALI0_A08217g),gene6995(YALI0_F30129g),gene4997(YALI0_E20625g),gene2339(YALI0_C10901g),gene2704(YALI0_C19712g)	gene2895(YALI0_C23969g),gene3234(YALI0_D07370g),gene2860(YALI0_C23210g),gene4509(YALI0_E09493g)	http://www.kegg.jp/kegg-bin/show_pathway?map00240/K01493%09%23FFFFFF,green/K01955%09%23FFFFFF,green/K03783%09%23FFFFFF,red/K00761%09%23FFFFFF,red/K00560%09%23FFFFFF,red/K03787%09%23FFFFFF,red/K11541%09%23FFFFFF,green/K14642%09%23FFFFFF,red/K01956%09%23FFFFFF,green/
yli00680	Methane metabolism	Metabolism	Energy metabolism	4	4	8	26	0.617964	1	gene4809(YALI0_E16346g),gene4722(YALI0_E14256g),gene1822(YALI0_B22506g),gene3886(YALI0_D22484g)	gene5930(YALI0_F05962g),gene2214(YALI0_C08074g),gene6945(YALI0_F28765g),gene1704(YALI0_B19976g)	http://www.kegg.jp/kegg-bin/show_pathway?map00680/K01895%09%23FFFFFF,green/K00122%09%23FFFFFF,purple/K00600%09%23FFFFFF,red/
yli04213	Longevity regulating pathway - multiple species	Organismal Systems	Aging	5	4	9	30	0.651057	1	gene6790(YALI0_F25289g),gene2571(YALI0_C16621g),gene6532(YALI0_F19426g),gene5661(YALI0_E35046g),gene7035(YALI0_F30987g)	gene3009(YALI0_D02145g),gene5627(YALI0_E34265g),gene1710(YALI0_B20086g),gene1561(YALI0_B16742g)	http://www.kegg.jp/kegg-bin/show_pathway?map04213/K03283%09%23FFFFFF,red/K12762%09%23FFFFFF,red/K04564%09%23FFFFFF,purple/K11121%09%23FFFFFF,green/K03781%09%23FFFFFF,purple/
yli00400	Phenylalanine, tyrosine and tryptophan biosynthesis	Metabolism	Amino acid metabolism	3	2	5	17	0.671888	1	gene5013(YALI0_E20977g),gene2088(YALI0_C05258g),gene6963(YALI0_F29337g)	gene1707(YALI0_B20020g),gene4742(YALI0_E14751g)	http://www.kegg.jp/kegg-bin/show_pathway?map00400/K01657%09%23FFFFFF,green/K14454%09%23FFFFFF,red/K00838%09%23FFFFFF,red/K05821%09%23FFFFFF,red/K01626%09%23FFFFFF,green/
yli03013	RNA transport	Genetic Information Processing	Translation	3	24	27	90	0.682805	1	gene6020(YALI0_F07887g),gene1262(YALI0_B10021g),gene1752(YALI0_B20988g)	gene1515(YALI0_B15708g),gene5389(YALI0_E29293g),gene3237(YALI0_D07436g),gene6243(YALI0_F13068g),gene1828(YALI0_B22638g),gene5377(YALI0_E29007g),gene4206(YALI0_E02530g),gene4099(YALI0_E00198g),gene1044(YALI0_B04774g),gene887(YALI0_B01034g),gene1043(YALI0_B04752g),gene86(YALI0_A02178g),gene6759(YALI0_F24563g),gene909(YALI0_B01562g),gene6031(YALI0_F08151g),gene5051(YALI0_E21846g),gene2634(YALI0_C181…	http://www.kegg.jp/kegg-bin/show_pathway?map03013/K14288%09%23FFFFFF,green/K14526%09%23FFFFFF,green/K03538%09%23FFFFFF,green/K03239%09%23FFFFFF,green/K14304%09%23FFFFFF,green/K13137%09%23FFFFFF,red/K03241%09%23FFFFFF,green/K14294%09%23FFFFFF,green/K03237%09%23FFFFFF,green/K03262%09%23FFFFFF,green/K00784%09%23FFFFFF,green/K03539%09%23FFFFFF,green/K14284%09%23FFFFFF,green/K03240%09%23FFFFFF,green/K…
yli00440	Phosphonate and phosphinate metabolism	Metabolism	Metabolism of other amino acids	0	1	1	3	0.682883	1	-	gene2343(YALI0_C10989g)	http://www.kegg.jp/kegg-bin/show_pathway?map00440/K00994%09%23FFFFFF,green/
yli00040	Pentose and glucuronate interconversions	Metabolism	Carbohydrate metabolism	2	0	2	7	0.707603	1	gene3016(YALI0_D02321g),gene6150(YALI0_F10923g)	-	http://www.kegg.jp/kegg-bin/show_pathway?map00040/K00854%09%23FFFFFF,red/K00012%09%23FFFFFF,red/
yli00230	Purine metabolism	Metabolism	Nucleotide metabolism	12	2	14	49	0.736169	1	gene6674(YALI0_F22605g),gene5227(YALI0_E25740g),gene325(YALI0_A08217g),gene5968(YALI0_F06710g),gene6604(YALI0_F21010g),gene6995(YALI0_F30129g),gene7005(YALI0_F30349g),gene4599(YALI0_E11495g),gene6079(YALI0_F09251g),gene2704(YALI0_C19712g),gene3712(YALI0_D18337g),gene316(YALI0_A08041g)	gene872(YALI0_B00704g),gene878(YALI0_B00836g)	http://www.kegg.jp/kegg-bin/show_pathway?map00230/K01487%09%23FFFFFF,red/K01120%09%23FFFFFF,red/K00939%09%23FFFFFF,green/K11788%09%23FFFFFF,red/K03783%09%23FFFFFF,red/K01483%09%23FFFFFF,red/K01490%09%23FFFFFF,red/K00988%09%23FFFFFF,red/K07127%09%23FFFFFF,red/K00365%09%23FFFFFF,red/K03787%09%23FFFFFF,red/K14642%09%23FFFFFF,red/K00948%09%23FFFFFF,green/K01477%09%23FFFFFF,red/
yli00561	Glycerolipid metabolism	Metabolism	Lipid metabolism	5	1	6	22	0.748624	1	gene898(YALI0_B01298g),gene3264(YALI0_D07986g),gene1142(YALI0_B07117g),gene3677(YALI0_D17534g),gene5950(YALI0_F06358g)	gene5493(YALI0_E31515g)	http://www.kegg.jp/kegg-bin/show_pathway?map00561/K11155%09%23FFFFFF,red/K17900%09%23FFFFFF,red/K18097%09%23FFFFFF,red/K00128%09%23FFFFFF,red/K01046%09%23FFFFFF,green/K14675%09%23FFFFFF,red/
yli00760	Nicotinate and nicotinamide metabolism	Metabolism	Metabolism of cofactors and vitamins	4	1	5	19	0.772415	1	gene6831(YALI0_F26191g),gene325(YALI0_A08217g),gene6995(YALI0_F30129g),gene852(YALI0_B00220g)	gene3009(YALI0_D02145g)	http://www.kegg.jp/kegg-bin/show_pathway?map00760/K03787%09%23FFFFFF,red/K11121%09%23FFFFFF,green/K03783%09%23FFFFFF,red/K00763%09%23FFFFFF,red/K00135%09%23FFFFFF,red/
yli04933	AGE-RAGE signaling pathway in diabetic complications	Human Diseases	Endocrine and metabolic diseases	2	0	2	8	0.7789	1	gene2046(YALI0_C04180g),gene6100(YALI0_F09746g)	-	http://www.kegg.jp/kegg-bin/show_pathway?map04933/K05857%09%23FFFFFF,red/K02677%09%23FFFFFF,red/
yli03450	Non-homologous end-joining	Genetic Information Processing	Replication and repair	1	1	2	8	0.7789	1	gene2241(YALI0_C08701g)	gene4205(YALI0_E02508g)	http://www.kegg.jp/kegg-bin/show_pathway?map03450/K10868%09%23FFFFFF,green/K10884%09%23FFFFFF,red/
yli00514	Other types of O-glycan biosynthesis	Metabolism	Glycan biosynthesis and metabolism	0	1	1	4	0.783811	1	-	gene255(YALI0_A06589g)	http://www.kegg.jp/kegg-bin/show_pathway?map00514/K10967%09%23FFFFFF,green/
yli00480	Glutathione metabolism	Metabolism	Metabolism of other amino acids	5	1	6	23	0.789394	1	gene4958(YALI0_E19745g),gene2762(YALI0_C21021g),gene2745(YALI0_C20669g),gene5427(YALI0_E30129g),gene6802(YALI0_F25575g)	gene1996(YALI0_C03069g)	http://www.kegg.jp/kegg-bin/show_pathway?map00480/K00681%09%23FFFFFF,red/K00799%09%23FFFFFF,purple/K11204%09%23FFFFFF,red/
yli04139	Mitophagy - yeast	Cellular Processes	Transport and catabolism	6	3	9	34	0.80207	1	gene6059(YALI0_F08789g),gene1523(YALI0_B15906g),gene4010(YALI0_D25388g),gene6100(YALI0_F09746g),gene4212(YALI0_E02662g),gene1036(YALI0_B04598g)	gene6531(YALI0_F19404g),gene6371(YALI0_F15873g),gene4324(YALI0_E05181g)	http://www.kegg.jp/kegg-bin/show_pathway?map04139/K17800%09%23FFFFFF,green/K08330%09%23FFFFFF,red/K11227%09%23FFFFFF,red/K11231%09%23FFFFFF,red/K08269%09%23FFFFFF,red/K08341%09%23FFFFFF,red/K18191%09%23FFFFFF,green/K02677%09%23FFFFFF,red/K02332%09%23FFFFFF,green/
yli00562	Inositol phosphate metabolism	Metabolism	Carbohydrate metabolism	4	1	5	20	0.812963	1	gene2046(YALI0_C04180g),gene1945(YALI0_C01859g),gene99(YALI0_A02453g),gene1319(YALI0_B11286g)	gene5334(YALI0_E28153g)	http://www.kegg.jp/kegg-bin/show_pathway?map00562/K00915%09%23FFFFFF,red/K05857%09%23FFFFFF,red/K13711%09%23FFFFFF,red/K00888%09%23FFFFFF,green/K00140%09%23FFFFFF,red/
yli03010	Ribosome	Genetic Information Processing	Translation	2	30	32	113	0.818329	1	gene3497(YALI0_D13104g),gene6794(YALI0_F25399g)	gene2994(YALI0_D01804g),gene5439(YALI0_E30371g),gene6687(YALI0_F22935g),gene2207(YALI0_C07887g),gene6115(YALI0_F10076g),gene4991(YALI0_E20493g),gene1177(YALI0_B08074g),gene6446(YALI0_F17556g),gene2909(YALI0_C24277g),gene3869(YALI0_D22088g),gene6113(YALI0_F10032g),gene4517(YALI0_E09691g),gene121(YALI0_A03003g),gene3358(YALI0_D10065g),gene3484(YALI0_D12793g),gene1101(YALI0_B06116g),gene5484(YALI0_E…	http://www.kegg.jp/kegg-bin/show_pathway?map03010/K02959%09%23FFFFFF,green/K02992%09%23FFFFFF,green/K02911%09%23FFFFFF,green/K02948%09%23FFFFFF,green/K02996%09%23FFFFFF,green/K02864%09%23FFFFFF,green/K02988%09%23FFFFFF,green/K02961%09%23FFFFFF,green/K02914%09%23FFFFFF,green/K02990%09%23FFFFFF,green/K02957%09%23FFFFFF,red/K02892%09%23FFFFFF,green/K02946%09%23FFFFFF,green/K02956%09%23FFFFFF,green/K…
yli00051	Fructose and mannose metabolism	Metabolism	Carbohydrate metabolism	4	1	5	21	0.847511	1	gene1813(YALI0_B22308g),gene1635(YALI0_B18348g),gene4979(YALI0_E20207g),gene4773(YALI0_E15488g)	gene1536(YALI0_B16192g)	http://www.kegg.jp/kegg-bin/show_pathway?map00051/K17742%09%23FFFFFF,green/K01809%09%23FFFFFF,red/K00844%09%23FFFFFF,red/
yli00565	Ether lipid metabolism	Metabolism	Lipid metabolism	0	1	1	5	0.852637	1	-	gene2343(YALI0_C10989g)	http://www.kegg.jp/kegg-bin/show_pathway?map00565/K00994%09%23FFFFFF,green/
yli04138	Autophagy - yeast	Cellular Processes	Transport and catabolism	14	3	17	66	0.886131	1	gene2723(YALI0_C20119g),gene5018(YALI0_E21087g),gene4010(YALI0_D25388g),gene5950(YALI0_F06358g),gene4212(YALI0_E02662g),gene2848(YALI0_C22946g),gene2562(YALI0_C16412g),gene5173(YALI0_E24453g),gene2138(YALI0_C06347g),gene1036(YALI0_B04598g),gene5814(YALI0_F03432g),gene5318(YALI0_E27742g),gene1550(YALI0_B16500g),gene1319(YALI0_B11286g)	gene887(YALI0_B01034g),gene3925(YALI0_D23386g),gene384(YALI0_A09768g)	http://www.kegg.jp/kegg-bin/show_pathway?map04138/K17606%09%23FFFFFF,green/K08343%09%23FFFFFF,red/K03237%09%23FFFFFF,green/K17888%09%23FFFFFF,green/K01336%09%23FFFFFF,red/K08269%09%23FFFFFF,red/K08337%09%23FFFFFF,red/K08341%09%23FFFFFF,red/K09464%09%23FFFFFF,red/K20195%09%23FFFFFF,red/K08331%09%23FFFFFF,red/K08502%09%23FFFFFF,red/K17900%09%23FFFFFF,red/K08330%09%23FFFFFF,red/K21197%09%23FFFFFF,re…
yli03022	Basal transcription factors	Genetic Information Processing	Transcription	1	6	7	30	0.886944	1	gene3153(YALI0_D05547g)	gene6997(YALI0_F30173g),gene6838(YALI0_F26367g),gene2054(YALI0_C04367g),gene4174(YALI0_E01826g),gene3098(YALI0_D04334g),gene6592(YALI0_F20746g)	http://www.kegg.jp/kegg-bin/show_pathway?map03022/K03136%09%23FFFFFF,green/K10844%09%23FFFFFF,green/K03143%09%23FFFFFF,green/K14651%09%23FFFFFF,red/K03144%09%23FFFFFF,green/K10842%09%23FFFFFF,green/K02202%09%23FFFFFF,green/
yli00900	Terpenoid backbone biosynthesis	Metabolism	Metabolism of terpenoids and polyketides	1	3	4	19	0.899684	1	gene4581(YALI0_E11099g)	gene1198(YALI0_B08536g),gene3563(YALI0_D14762g),gene2661(YALI0_C18755g)	http://www.kegg.jp/kegg-bin/show_pathway?map00900/K05355%09%23FFFFFF,green/K00626%09%23FFFFFF,purple/K05954%09%23FFFFFF,green/
yli00510	N-Glycan biosynthesis	Metabolism	Glycan biosynthesis and metabolism	3	3	6	27	0.903475	1	gene4922(YALI0_E18942g),gene3184(YALI0_D06281g),gene3288(YALI0_D08558g)	gene5621(YALI0_E34133g),gene3827(YALI0_D21032g),gene1970(YALI0_C02475g)	http://www.kegg.jp/kegg-bin/show_pathway?map00510/K07252%09%23FFFFFF,green/K03842%09%23FFFFFF,green/K03847%09%23FFFFFF,green/K03844%09%23FFFFFF,red/K00721%09%23FFFFFF,red/K00902%09%23FFFFFF,red/
yli00300	Lysine biosynthesis	Metabolism	Amino acid metabolism	1	1	2	11	0.909348	1	gene5013(YALI0_E20977g)	gene4215(YALI0_E02728g)	http://www.kegg.jp/kegg-bin/show_pathway?map00300/K01705%09%23FFFFFF,green/K00838%09%23FFFFFF,red/
yli03420	Nucleotide excision repair	Genetic Information Processing	Replication and repair	2	6	8	35	0.910798	1	gene3794(YALI0_D20240g),gene5708(YALI0_F01034g)	gene6997(YALI0_F30173g),gene5297(YALI0_E27269g),gene2054(YALI0_C04367g),gene4174(YALI0_E01826g),gene3098(YALI0_D04334g),gene6592(YALI0_F20746g)	http://www.kegg.jp/kegg-bin/show_pathway?map03420/K03143%09%23FFFFFF,green/K03144%09%23FFFFFF,green/K02202%09%23FFFFFF,green/K03657%09%23FFFFFF,green/K10844%09%23FFFFFF,green/K10747%09%23FFFFFF,red/K10842%09%23FFFFFF,green/K10846%09%23FFFFFF,red/
yli03018	RNA degradation	Genetic Information Processing	Folding, sorting and degradation	1	11	12	51	0.926872	1	gene6655(YALI0_F22165g)	gene5574(YALI0_E33121g),gene7043(YALI0_F31141g),gene233(YALI0_A05995g),gene3404(YALI0_D11000g),gene1197(YALI0_B08514g),gene6569(YALI0_F20240g),gene3208(YALI0_D06776g),gene669(YALI0_A17292g),gene3524(YALI0_D13750g),gene3151(YALI0_D05511g),gene4291(YALI0_E04444g)	http://www.kegg.jp/kegg-bin/show_pathway?map03018/K12590%09%23FFFFFF,green/K11600%09%23FFFFFF,green/K12591%09%23FFFFFF,green/K12584%09%23FFFFFF,green/K03678%09%23FFFFFF,green/K03681%09%23FFFFFF,green/K12619%09%23FFFFFF,green/K12597%09%23FFFFFF,green/K03679%09%23FFFFFF,green/K12609%09%23FFFFFF,red/K07573%09%23FFFFFF,green/K12589%09%23FFFFFF,green/
yli04011	MAPK signaling pathway - yeast	Environmental Information Processing	Signal transduction	11	4	15	62	0.927411	1	gene2582(YALI0_C16863g),gene6059(YALI0_F08789g),gene261(YALI0_A06699g),gene1523(YALI0_B15906g),gene6100(YALI0_F09746g),gene5700(YALI0_F00858g),gene6505(YALI0_F18788g),gene3521(YALI0_D13684g),gene4152(YALI0_E01364g),gene1272(YALI0_B10241g),gene7035(YALI0_F30987g)	gene4816(YALI0_E16533g),gene3085(YALI0_D04048g),gene5627(YALI0_E34265g),gene5334(YALI0_E28153g)	http://www.kegg.jp/kegg-bin/show_pathway?map04011/K11246%09%23FFFFFF,green/K09051%09%23FFFFFF,red/K03781%09%23FFFFFF,purple/K00888%09%23FFFFFF,green/K09265%09%23FFFFFF,red/K19845%09%23FFFFFF,red/K11234%09%23FFFFFF,green/K11227%09%23FFFFFF,red/K11231%09%23FFFFFF,red/K04536%09%23FFFFFF,red/K19839%09%23FFFFFF,red/K07973%09%23FFFFFF,red/K11240%09%23FFFFFF,red/K02677%09%23FFFFFF,red/
yli00062	Fatty acid elongation	Metabolism	Lipid metabolism	1	0	1	7	0.931561	1	gene1280(YALI0_B10406g)	-	http://www.kegg.jp/kegg-bin/show_pathway?map00062/K07511%09%23FFFFFF,red/
yli00020	Citrate cycle (TCA cycle)	Metabolism	Carbohydrate metabolism	1	4	5	25	0.937126	1	gene2588(YALI0_C16995g)	gene5650(YALI0_E34793g),gene3972(YALI0_D24431g),gene2158(YALI0_C06776g),gene3926(YALI0_D23397g)	http://www.kegg.jp/kegg-bin/show_pathway?map00020/K01648%09%23FFFFFF,green/K00235%09%23FFFFFF,green/K01679%09%23FFFFFF,green/K01610%09%23FFFFFF,red/
yli04130	SNARE interactions in vesicular transport	Genetic Information Processing	Folding, sorting and degradation	4	0	4	21	0.938742	1	gene1296(YALI0_B10780g),gene2562(YALI0_C16412g),gene2580(YALI0_C16819g),gene4030(YALI0_D25872g)	-	http://www.kegg.jp/kegg-bin/show_pathway?map04130/K08486%09%23FFFFFF,red/K08502%09%23FFFFFF,red/K08490%09%23FFFFFF,red/
yli03015	mRNA surveillance pathway	Genetic Information Processing	Translation	1	8	9	45	0.973652	1	gene5390(YALI0_E29307g)	gene3571(YALI0_D14982g),gene5389(YALI0_E29293g),gene6476(YALI0_F18194g),gene4206(YALI0_E02530g),gene5835(YALI0_F03883g),gene909(YALI0_B01562g),gene701(YALI0_A18007g),gene6304(YALI0_F14421g)	http://www.kegg.jp/kegg-bin/show_pathway?map03015/K12883%09%23FFFFFF,green/K15544%09%23FFFFFF,green/K06100%09%23FFFFFF,green/K14294%09%23FFFFFF,green/K14397%09%23FFFFFF,green/K12876%09%23FFFFFF,green/K06269%09%23FFFFFF,red/K14284%09%23FFFFFF,green/K14404%09%23FFFFFF,green/
yli03430	Mismatch repair	Genetic Information Processing	Replication and repair	2	1	3	20	0.975837	1	gene2301(YALI0_C10032g),gene5708(YALI0_F01034g)	gene5297(YALI0_E27269g)	http://www.kegg.jp/kegg-bin/show_pathway?map03430/K08734%09%23FFFFFF,red/K10747%09%23FFFFFF,red/K03657%09%23FFFFFF,green/
yli03440	Homologous recombination	Genetic Information Processing	Replication and repair	1	2	3	20	0.975837	1	gene5772(YALI0_F02431g)	gene3077(YALI0_D03888g),gene4205(YALI0_E02508g)	http://www.kegg.jp/kegg-bin/show_pathway?map03440/K10868%09%23FFFFFF,green/K10873%09%23FFFFFF,red/K04728%09%23FFFFFF,green/
yli00513	Various types of N-glycan biosynthesis	Metabolism	Glycan biosynthesis and metabolism	1	2	3	21	0.982019	1	gene3288(YALI0_D08558g)	gene5621(YALI0_E34133g),gene1970(YALI0_C02475g)	http://www.kegg.jp/kegg-bin/show_pathway?map00513/K03842%09%23FFFFFF,green/K03847%09%23FFFFFF,green/K03844%09%23FFFFFF,red/
yli03410	Base excision repair	Genetic Information Processing	Replication and repair	2	0	2	18	0.990568	1	gene2591(YALI0_C17061g),gene5708(YALI0_F01034g)	-	http://www.kegg.jp/kegg-bin/show_pathway?map03410/K10798%09%23FFFFFF,red/K10747%09%23FFFFFF,red/
yli00600	Sphingolipid metabolism	Metabolism	Lipid metabolism	0	1	1	13	0.993168	1	-	gene3084(YALI0_D04026g)	http://www.kegg.jp/kegg-bin/show_pathway?map00600/K04709%09%23FFFFFF,green/
yli04113	Meiosis - yeast	Cellular Processes	Cell growth and death	4	7	11	61	0.995147	1	gene6532(YALI0_F19426g),gene6742(YALI0_F24167g),gene5390(YALI0_E29307g),gene1408(YALI0_B13376g)	gene6391(YALI0_F16335g),gene4697(YALI0_E13684g),gene1896(YALI0_C00671g),gene5801(YALI0_F03113g),gene7067(YALI0_F31647g),gene4034(YALI0_D26015g),gene1471(YALI0_B14773g)	http://www.kegg.jp/kegg-bin/show_pathway?map04113/K12762%09%23FFFFFF,red/K10878%09%23FFFFFF,green/K02213%09%23FFFFFF,green/K06662%09%23FFFFFF,red/K02608%09%23FFFFFF,green/K12765%09%23FFFFFF,green/K02537%09%23FFFFFF,green/K06269%09%23FFFFFF,red/K12769%09%23FFFFFF,green/K06660%09%23FFFFFF,green/K12772%09%23FFFFFF,red/
yli03030	DNA replication	Genetic Information Processing	Replication and repair	3	2	5	36	0.996341	1	gene6846(YALI0_F26543g),gene494(YALI0_A12705g),gene5708(YALI0_F01034g)	gene253(YALI0_A06523g),gene579(YALI0_A15059g)	http://www.kegg.jp/kegg-bin/show_pathway?map03030/K03469%09%23FFFFFF,purple/K10747%09%23FFFFFF,red/
yli03040	Spliceosome	Genetic Information Processing	Transcription	2	14	16	84	0.997236	1	gene6790(YALI0_F25289g),gene5661(YALI0_E35046g)	gene3353(YALI0_D09955g),gene5448(YALI0_E30569g),gene2102(YALI0_C05555g),gene4769(YALI0_E15356g),gene5389(YALI0_E29293g),gene1429(YALI0_B13860g),gene1422(YALI0_B13706g),gene6591(YALI0_F20724g),gene5608(YALI0_E33847g),gene4206(YALI0_E02530g),gene2037(YALI0_C03982g),gene6929(YALI0_F28391g),gene5337(YALI0_E28226g),gene1079(YALI0_B05632g)	http://www.kegg.jp/kegg-bin/show_pathway?map03040/K12883%09%23FFFFFF,green/K11092%09%23FFFFFF,green/K12844%09%23FFFFFF,green/K12831%09%23FFFFFF,green/K12872%09%23FFFFFF,green/K03283%09%23FFFFFF,red/K10599%09%23FFFFFF,green/K12857%09%23FFFFFF,green/K12833%09%23FFFFFF,green/K12843%09%23FFFFFF,green/K12854%09%23FFFFFF,green/K12876%09%23FFFFFF,green/K12662%09%23FFFFFF,green/K12858%09%23FFFFFF,green/K…
yli00030	Pentose phosphate pathway	Metabolism	Carbohydrate metabolism	0	1	1	21	0.999686	1	-	gene878(YALI0_B00836g)	http://www.kegg.jp/kegg-bin/show_pathway?map00030/K00948%09%23FFFFFF,green/
yli04120	Ubiquitin mediated proteolysis	Genetic Information Processing	Folding, sorting and degradation	2	3	5	49	0.999921	1	gene1258(YALI0_B09977g),gene5849(YALI0_F04147g)	gene1828(YALI0_B22638g),gene2037(YALI0_C03982g),gene4096(YALI0_E00132g)	http://www.kegg.jp/kegg-bin/show_pathway?map04120/K10599%09%23FFFFFF,green/K10577%09%23FFFFFF,green/K10259%09%23FFFFFF,red/K10686%09%23FFFFFF,red/K10598%09%23FFFFFF,green/
yli04144	Endocytosis	Cellular Processes	Transport and catabolism	7	1	8	67	0.999966	1	gene2487(YALI0_C14586g),gene6790(YALI0_F25289g),gene5661(YALI0_E35046g),gene3241(YALI0_D07524g),gene4705(YALI0_E13904g),gene6875(YALI0_F27181g),gene6347(YALI0_F15367g)	gene2655(YALI0_C18623g)	http://www.kegg.jp/kegg-bin/show_pathway?map04144/K03283%09%23FFFFFF,red/K11839%09%23FFFFFF,red/K12488%09%23FFFFFF,red/K07889%09%23FFFFFF,red/K07941%09%23FFFFFF,red/K17919%09%23FFFFFF,red/K11824%09%23FFFFFF,green/
yli04141	Protein processing in endoplasmic reticulum	Genetic Information Processing	Folding, sorting and degradation	7	2	9	76	0.999989	1	gene5701(YALI0_F00880g),gene3411(YALI0_D11132g),gene4679(YALI0_E13255g),gene5661(YALI0_E35046g),gene4904(YALI0_E18546g),gene6206(YALI0_F12155g),gene6790(YALI0_F25289g)	gene887(YALI0_B01034g),gene6529(YALI0_F19360g)	http://www.kegg.jp/kegg-bin/show_pathway?map04141/K13525%09%23FFFFFF,red/K13993%09%23FFFFFF,red/K03283%09%23FFFFFF,red/K03237%09%23FFFFFF,green/K14018%09%23FFFFFF,red/K10661%09%23FFFFFF,green/K09485%09%23FFFFFF,red/K09503%09%23FFFFFF,red/
yli04111	Cell cycle - yeast	Cellular Processes	Cell growth and death	3	6	9	78	0.999994	1	gene5647(YALI0_E34727g),gene1408(YALI0_B13376g),gene1258(YALI0_B09977g)	gene4697(YALI0_E13684g),gene6538(YALI0_F19558g),gene1896(YALI0_C00671g),gene7067(YALI0_F31647g),gene4034(YALI0_D26015g),gene5953(YALI0_F06402g)	http://www.kegg.jp/kegg-bin/show_pathway?map04111/K10259%09%23FFFFFF,red/K02213%09%23FFFFFF,green/K06677%09%23FFFFFF,green/K06681%09%23FFFFFF,red/K06662%09%23FFFFFF,red/K02608%09%23FFFFFF,green/K02180%09%23FFFFFF,green/K02537%09%23FFFFFF,green/K06660%09%23FFFFFF,green/
yli04145	Phagosome	Cellular Processes	Transport and catabolism	1	0	1	34	0.999998	1	gene6875(YALI0_F27181g)	-	http://www.kegg.jp/kegg-bin/show_pathway?map04145/K07889%09%23FFFFFF,red/
yli00190	Oxidative phosphorylation	Metabolism	Energy metabolism	0	10	10	92	1	1	-	gene7139(cob-i1),gene7119(atp6),gene2377(YALI0_C11803g),gene6721(YALI0_F23727g),gene7135(cob),gene7128(cox2),gene3926(YALI0_D23397g),gene6052(YALI0_F08613g),gene7118(atp8),gene6762(YALI0_F24651g)	http://www.kegg.jp/kegg-bin/show_pathway?map00190/K02125%09%23FFFFFF,green/K00412%09%23FFFFFF,green/K02126%09%23FFFFFF,green/K02261%09%23FFFFFF,green/K02257%09%23FFFFFF,green/K00415%09%23FFFFFF,green/K01507%09%23FFFFFF,green/K00235%09%23FFFFFF,green/K02259%09%23FFFFFF,green/
