# Supplementary figures and images for: Metabolome and Transcriptome Profiling Reveal Carbon Metabolic Flux Changes in Yarrowia lipolytica Cells to Rapamycin
Source: MDPI journal article supplement (doi:10.3390/jof8090939), 2022-09-06

Figure S1: PCA score plots and RSD of QC samples.

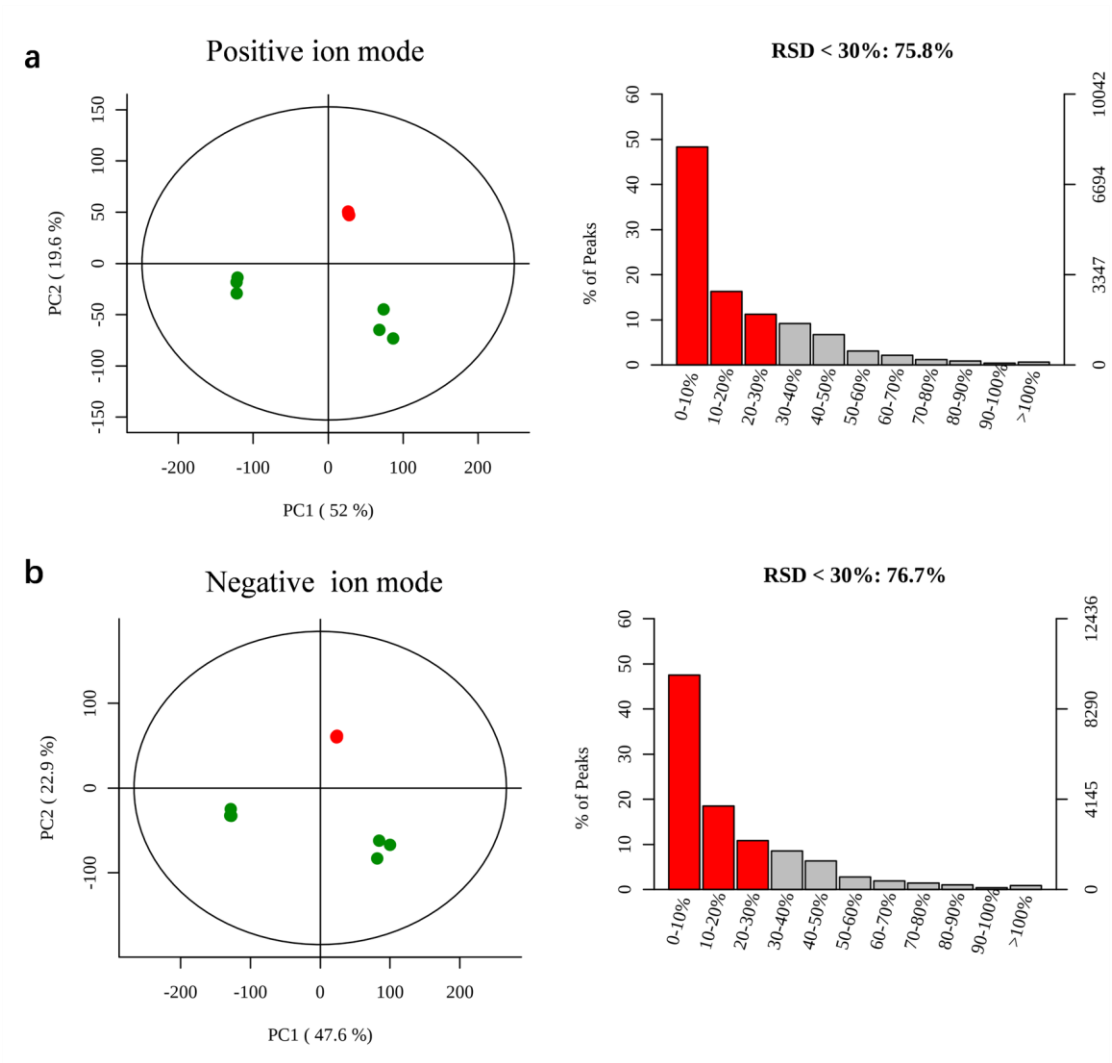

Supplement: s1 [file s1]
